# Supplementary material for: TP53-inducible putative long noncoding RNAs encode functional polypeptides that suppress cell proliferation
Source: HighWire-hosted journal article supplement (doi:10.1101/gr.275831.121), 2022-05-24
Supplement: Supplemental_Table_S1.xlsx [file Supplemental_Table_S1.xlsx]

## Sheet: README
Supplemental Table S1: Transcripts differentially expressed upon DNA damage treatment with ADR identified by the RNA-seq analysis.
The table below indicates figures that the other tabs are corresponding to.
tab name	Figure
WT+ vs WT-(ALL)	1C
WT+ vs KO+ (ALL)	1C
WT+ vs WT- (protein)	S2A,S2B
WT+ vs KO+ (protein)	S2A,S2B
2012 overlapped proteins	S2C

## Sheet: WT+ vs WT-(ALL)
gene	baseMean	log2FoldChange	lfcSE	stat	pvalue	padj	genename	genetype
ENSG00000268903.1	7.70636	4.85651	1.83091	2.65251	0.00798955	0.0263421	AL627309.6	processed_pseudogene
ENSG00000225972.1	53.7597	1.43734	0.559873	2.56726	0.0102506	0.0324877	MTND1P23	unprocessed_pseudogene
ENSG00000230092.7	61.326	1.44148	0.470949	3.0608	0.0022075	0.00876277	AL669831.4	transcribed_unprocessed_pseudogene
ENSG00000187634.12	16.9897	-2.66664	0.911235	-2.92641	0.00342903	0.012848	SAMD11	protein_coding
ENSG00000187961.14	381.375	-1.43169	0.275076	-5.2047	1.94311e-07	1.88212e-06	KLHL17	protein_coding
ENSG00000187642.9	123.824	6.56915	0.72752	9.0295	1.72452e-19	6.29867e-18	PERM1	protein_coding
ENSG00000272512.1	38.7533	-1.79702	0.583667	-3.07885	0.00207803	0.00833139	AL645608.7	lincRNA
ENSG00000188290.10	107.32	-1.54471	0.395264	-3.90805	9.30455e-05	0.000537007	HES4	protein_coding
ENSG00000217801.10	123.21	-1.49645	0.351285	-4.25995	2.04476e-05	0.000135622	AL390719.1	transcribed_unprocessed_pseudogene
ENSG00000131591.17	345.576	-1.05369	0.254341	-4.1428	3.43084e-05	0.000217193	C1orf159	protein_coding
ENSG00000223823.1	52.7901	-3.64154	0.630713	-5.77369	7.7555e-09	9.37092e-08	LINC01342	lincRNA
ENSG00000272141.1	18.7539	-4.67302	1.10891	-4.21407	2.50808e-05	0.000163058	AL390719.2	lincRNA
ENSG00000162572.20	80.3535	1.31352	0.443389	2.96245	0.00305199	0.0116321	SCNN1D	protein_coding
ENSG00000169972.12	486.042	-1.16479	0.258844	-4.49995	6.79679e-06	4.98632e-05	PUSL1	protein_coding
ENSG00000169962.5	24.9488	1.76181	0.696702	2.52878	0.011446	0.0355935	TAS1R3	protein_coding
ENSG00000107404.20	2439.75	-1.72908	0.219036	-7.89404	2.92558e-15	7.49889e-14	DVL1	protein_coding
ENSG00000162576.16	517.666	-1.33491	0.265747	-5.02323	5.08105e-07	4.58573e-06	MXRA8	protein_coding
ENSG00000235098.8	1151.71	2.04736	0.243245	8.41689	3.86616e-17	1.16271e-15	ANKRD65	protein_coding
ENSG00000225905.1	31.8776	2.84867	0.714265	3.98826	6.65605e-05	0.000395977	AL391244.1	antisense
ENSG00000179403.12	1768.88	-1.88528	0.243475	-7.74321	9.69394e-15	2.34124e-13	VWA1	protein_coding
ENSG00000215915.9	163.876	1.30109	0.338007	3.8493	0.000118455	0.000667539	ATAD3C	protein_coding
ENSG00000160072.19	1352.26	-1.50737	0.22336	-6.74861	1.49271e-11	2.57579e-10	ATAD3B	protein_coding
ENSG00000197785.13	1234.16	-1.64209	0.228999	-7.17073	7.45997e-13	1.50564e-11	ATAD3A	protein_coding
ENSG00000197530.12	2419.12	1.60247	0.197546	8.1119	4.98355e-16	1.36607e-14	MIB2	protein_coding
ENSG00000169885.10	19.8721	4.18592	1.01666	4.11731	3.83313e-05	0.000240041	CALML6	protein_coding
ENSG00000142609.18	65.3992	1.85406	0.4581	4.04728	5.18157e-05	0.000316056	CFAP74	protein_coding
ENSG00000269896.2	63.8194	2.25194	0.476548	4.72551	2.29536e-06	1.84489e-05	AL513477.1	transcribed_processed_pseudogene
ENSG00000197921.6	12.8753	2.8631	1.09801	2.60755	0.00911932	0.0294366	HES5	protein_coding
ENSG00000238164.6	434.582	3.90784	0.31665	12.3412	5.4322e-35	5.6278e-33	TNFRSF14-AS1	antisense
ENSG00000157873.17	1130.43	2.25029	0.222072	10.1331	3.93834e-24	2.05571e-22	TNFRSF14	protein_coding
ENSG00000157870.16	616.871	-1.60887	0.228507	-7.0408	1.91139e-12	3.65728e-11	PRXL2B	protein_coding
ENSG00000130762.15	762.81	-1.45164	0.236569	-6.13624	8.44965e-10	1.16042e-08	ARHGEF16	protein_coding
ENSG00000207776.1	47.6602	-1.47889	0.509962	-2.90001	0.00373149	0.0138235	MIR551A	miRNA
ENSG00000158109.15	1031.63	-1.11395	0.227548	-4.89546	9.80744e-07	8.43508e-06	TPRG1L	protein_coding
ENSG00000078900.15	89.8171	1.08648	0.410522	2.64659	0.00813088	0.0267304	TP73	protein_coding
ENSG00000169598.15	230.004	-2.02049	0.292031	-6.91875	4.55661e-12	8.32689e-11	DFFB	protein_coding
ENSG00000198912.11	773.899	-1.38588	0.228686	-6.06018	1.35971e-09	1.81875e-08	C1orf174	protein_coding
ENSG00000236423.5	120.254	-1.66354	0.386654	-4.30241	1.68947e-05	0.000114056	LINC01134	lincRNA
ENSG00000131697.18	992.799	-1.0594	0.220608	-4.80218	1.5695e-06	1.30022e-05	NPHP4	protein_coding
ENSG00000116254.18	215.482	4.27281	0.361436	11.8217	3.01344e-32	2.66582e-30	CHD5	protein_coding
ENSG00000158286.13	343.526	-1.49242	0.245795	-6.07178	1.265e-09	1.69908e-08	RNF207	protein_coding
ENSG00000116237.16	3232.9	-1.403	0.214171	-6.55085	5.72087e-11	9.22893e-10	ICMT	protein_coding
ENSG00000158292.7	189.549	2.70022	0.319445	8.45285	2.84274e-17	8.67371e-16	GPR153	protein_coding
ENSG00000069812.11	168.279	4.42906	0.408527	10.8415	2.18798e-27	1.42622e-25	HES2	protein_coding
ENSG00000187017.16	1473.14	-1.16748	0.217606	-5.36511	8.09015e-08	8.33078e-07	ESPN	protein_coding
ENSG00000215788.10	54.1007	1.83075	0.500482	3.65796	0.000254228	0.00131466	TNFRSF25	protein_coding
ENSG00000171680.21	508.777	1.23343	0.247636	4.98084	6.33079e-07	5.60595e-06	PLEKHG5	protein_coding
ENSG00000270035.1	9.88022	3.55008	1.28726	2.75786	0.00581805	0.0201891	AL359881.2	lincRNA
ENSG00000269978.1	21.5697	1.86612	0.753457	2.47675	0.0132585	0.0402557	AL359881.1	lincRNA
ENSG00000049246.14	301.215	-1.65682	0.261236	-6.34225	2.26435e-10	3.32776e-09	PER3	protein_coding
ENSG00000049249.8	7.3742	4.78806	1.83861	2.60417	0.00920972	0.0296546	TNFRSF9	protein_coding
ENSG00000074800.15	56426.8	-1.0039	0.197387	-5.08596	3.65772e-07	3.38295e-06	ENO1	protein_coding
ENSG00000232208.2	30.8279	6.88891	1.55163	4.43978	9.00512e-06	6.47223e-05	AL139415.1	processed_pseudogene
ENSG00000142583.17	34.101	8.48913	1.55081	5.47398	4.4003e-08	4.75774e-07	SLC2A5	protein_coding
ENSG00000180758.12	757.77	-1.31183	0.227845	-5.75758	8.53261e-09	1.02282e-07	GPR157	protein_coding
ENSG00000234546.3	130.17	2.28228	0.357048	6.39208	1.63643e-10	2.46887e-09	LNCTAM34A	lincRNA
ENSG00000173614.14	304.294	1.55832	0.256897	6.06594	1.31183e-09	1.75989e-08	NMNAT1	protein_coding
ENSG00000116649.10	2237.83	-1.72093	0.215319	-7.99247	1.32257e-15	3.48511e-14	SRM	protein_coding
ENSG00000120942.13	1272.15	-1.05522	0.207714	-5.08015	3.77143e-07	3.47751e-06	UBIAD1	protein_coding
ENSG00000204624.8	14.5122	3.70132	1.09644	3.37575	0.000736154	0.00338132	DISP3	protein_coding
ENSG00000116661.11	2790.14	1.18911	0.208849	5.69364	1.24358e-08	1.45926e-07	FBXO2	protein_coding
ENSG00000132879.14	1080.14	1.20156	0.224503	5.35207	8.69529e-08	8.88341e-07	FBXO44	protein_coding
ENSG00000116663.11	106.386	-1.35325	0.386734	-3.49917	0.000466707	0.00225228	FBXO6	protein_coding
ENSG00000116670.15	709.232	-1.54332	0.249628	-6.18248	6.31008e-10	8.78543e-09	MAD2L2	protein_coding
ENSG00000162490.7	370.428	8.15998	0.688648	11.8493	2.17071e-32	1.94725e-30	DRAXIN	protein_coding
ENSG00000177674.16	1137.36	1.39322	0.241807	5.76168	8.32808e-09	1.00051e-07	AGTRAP	protein_coding
ENSG00000215910.7	7.96286	6.38737	1.84091	3.46968	0.00052107	0.00248688	C1orf167	protein_coding
ENSG00000011021.23	1821.77	-1.21169	0.186741	-6.48861	8.66305e-11	1.36047e-09	CLCN6	protein_coding
ENSG00000116685.16	2703.63	-1.71556	0.212638	-8.068	7.14618e-16	1.93743e-14	KIAA2013	protein_coding
ENSG00000083444.17	5469.81	-1.53259	0.193537	-7.91886	2.39699e-15	6.19647e-14	PLOD1	protein_coding
ENSG00000116691.11	437.731	-1.67582	0.253691	-6.60576	3.95484e-11	6.52681e-10	MIIP	protein_coding
ENSG00000272482.1	238.952	1.28909	0.275784	4.67429	2.94978e-06	2.32157e-05	AC254633.1	lincRNA
ENSG00000162494.6	20.73	7.76674	1.62669	4.77457	1.80089e-06	1.47202e-05	LRRC38	protein_coding
ENSG00000175147.12	179.661	-2.48212	0.331317	-7.49166	6.80083e-14	1.5365e-12	TMEM51-AS1	antisense
ENSG00000171729.14	645.381	-1.86899	0.241691	-7.73299	1.05053e-14	2.52193e-13	TMEM51	protein_coding
ENSG00000142621.19	12.891	2.8729	1.03739	2.76934	0.005617	0.0196158	FHAD1	protein_coding
ENSG00000142634.13	912.262	-1.20316	0.231631	-5.19431	2.05485e-07	1.9833e-06	EFHD2	protein_coding
ENSG00000272510.1	28.6798	-1.63668	0.657077	-2.49085	0.0127436	0.0389835	AL121992.3	antisense
ENSG00000116771.6	3232.68	-1.65076	0.202801	-8.13982	3.95881e-16	1.09397e-14	AGMAT	protein_coding
ENSG00000162461.8	12.6008	4.54141	1.35956	3.34036	0.000836698	0.00377442	SLC25A34	protein_coding
ENSG00000162458.13	1311.18	-1.44372	0.214646	-6.72603	1.74356e-11	2.98973e-10	FBLIM1	protein_coding
ENSG00000132881.12	32.4775	1.49555	0.614074	2.43545	0.0148731	0.0442314	CPLANE2	protein_coding
ENSG00000187144.11	94.2519	1.59409	0.404422	3.94165	8.09245e-05	0.000473877	SPATA21	protein_coding
ENSG00000080947.14	1011.51	2.59411	0.201711	12.8605	7.50866e-38	9.42804e-36	CROCCP3	transcribed_unprocessed_pseudogene
ENSG00000206652.1	41.221	1.6758	0.558313	3.00154	0.0026862	0.0103935	RNU1-1	snRNA
ENSG00000233421.4	49.9792	1.58996	0.543897	2.92327	0.00346371	0.0129637	LINC01783	lincRNA
ENSG00000219481.10	8362.34	1.44785	0.170049	8.51429	1.67621e-17	5.23158e-16	NBPF1	protein_coding
ENSG00000058453.17	579.569	1.65789	0.231319	7.16711	7.65951e-13	1.54135e-11	CROCC	protein_coding
ENSG00000227684.2	22.5452	2.51493	0.774603	3.24673	0.00116737	0.00505339	CROCCP4	transcribed_unprocessed_pseudogene
ENSG00000142623.11	4.91903	5.69636	2.04193	2.7897	0.00527568	0.0185599	PADI1	protein_coding
ENSG00000142619.4	208.314	8.65116	1.06029	8.15925	3.37125e-16	9.34449e-15	PADI3	protein_coding
ENSG00000266634.1	4.03729	5.40954	2.14675	2.51987	0.0117398	0.0363452	MIR3972	miRNA
ENSG00000159339.13	1798.97	9.76482	0.546512	17.8676	2.11052e-71	1.06491e-68	PADI4	protein_coding
ENSG00000276747.1	5.02774	5.72499	2.02926	2.82123	0.00478406	0.0170773	PADI6	protein_coding
ENSG00000179023.8	1635.1	4.65937	0.212805	21.895	2.89871e-106	4.38783e-103	KLHDC7A	protein_coding
ENSG00000159423.17	1582.56	-1.41346	0.205409	-6.88119	5.93525e-12	1.06886e-10	ALDH4A1	protein_coding
ENSG00000053372.5	1883.02	-1.58137	0.207217	-7.63147	2.32094e-14	5.42822e-13	MRTO4	protein_coding
ENSG00000173436.15	322.869	1.01	0.257545	3.92162	8.79547e-05	0.000510872	MICOS10	protein_coding
ENSG00000158747.14	351.23	-1.53039	0.291345	-5.25285	1.49764e-07	1.47528e-06	NBL1	protein_coding
ENSG00000188257.11	2089.34	-1.44	0.228385	-6.30514	2.87928e-10	4.18409e-09	PLA2G2A	protein_coding
ENSG00000162545.6	3509.8	-1.76865	0.179657	-9.84458	7.2338e-23	3.43978e-21	CAMK2N1	protein_coding
ENSG00000158825.6	36.6842	1.84505	0.589111	3.13193	0.00173662	0.00715093	CDA	protein_coding
ENSG00000158828.8	803.199	1.2549	0.230318	5.44854	5.07841e-08	5.42846e-07	PINK1	protein_coding
ENSG00000117245.12	130.185	2.49538	0.361156	6.90942	4.86649e-12	8.85753e-11	KIF17	protein_coding
ENSG00000235432.1	6.56778	6.10848	1.92052	3.18065	0.00146947	0.00617266	AL663074.2	unprocessed_pseudogene
ENSG00000162551.14	1790.09	3.34911	0.217777	15.3786	2.27788e-53	5.17211e-51	ALPL	protein_coding
ENSG00000233431.1	5.98196	5.97577	1.94781	3.06794	0.00215541	0.00859734	LINC02596	antisense
ENSG00000142798.20	20409.1	1.81819	0.191148	9.51198	1.87069e-21	8.1553e-20	HSPG2	protein_coding
ENSG00000283234.1	12.6734	5.5891	1.71087	3.26682	0.00108763	0.00474229	AL590556.2	transcribed_unitary_pseudogene
ENSG00000230068.2	85.4209	1.56013	0.407492	3.82861	0.000128871	0.000719831	CDC42-IT1	sense_intronic
ENSG00000133216.16	18.3841	4.07509	1.0337	3.94223	8.07259e-05	0.000472816	EPHB2	protein_coding
ENSG00000125945.15	486.208	1.01296	0.225611	4.48986	7.12684e-06	5.20743e-05	ZNF436	protein_coding
ENSG00000249087.6	149.156	1.20441	0.324404	3.71269	0.000205071	0.00109153	ZNF436-AS1	antisense
ENSG00000007968.7	491.369	-1.30379	0.241794	-5.39217	6.96134e-08	7.27563e-07	E2F2	protein_coding
ENSG00000197880.8	20.5251	3.16742	0.890726	3.556	0.000376538	0.00186808	MDS2	lincRNA
ENSG00000011009.11	4179.23	1.30784	0.221549	5.90315	3.56618e-09	4.51523e-08	LYPLA2	protein_coding
ENSG00000117305.15	693.84	1.4184	0.225281	6.29613	3.05173e-10	4.4229e-09	HMGCL	protein_coding
ENSG00000179163.11	987.403	1.01972	0.204506	4.98624	6.15657e-07	5.46055e-06	FUCA1	protein_coding
ENSG00000142677.4	180.7	-1.072	0.344414	-3.11253	0.00185492	0.0075547	IL22RA1	protein_coding
ENSG00000158055.15	338.027	11.7977	1.46424	8.05724	7.80347e-16	2.10308e-14	GRHL3	protein_coding
ENSG00000184454.7	27.0899	-3.19284	0.787653	-4.05361	5.04333e-05	0.00030873	NCMAP	protein_coding
ENSG00000169504.15	4476.87	-1.31959	0.182461	-7.23218	4.75298e-13	9.84077e-12	CLIC4	protein_coding
ENSG00000187010.21	8.2197	4.95164	1.80621	2.74146	0.00611675	0.0210361	RHD	protein_coding
ENSG00000188672.18	16.4728	3.56317	1.01782	3.50078	0.000463895	0.00224038	RHCE	protein_coding
ENSG00000117643.14	55.6642	4.21384	0.628086	6.70903	1.95927e-11	3.3386e-10	MAN1C1	protein_coding
ENSG00000228172.5	53.7882	1.24232	0.482922	2.57251	0.0100964	0.0320587	AL020996.1	antisense
ENSG00000127423.10	285.875	-1.04548	0.260441	-4.01429	5.96249e-05	0.000359107	AUNIP	protein_coding
ENSG00000182749.5	1487.26	1.00878	0.206134	4.8938	9.89097e-07	8.49887e-06	PAQR7	protein_coding
ENSG00000158022.6	21.3611	7.81315	1.604	4.87103	1.11018e-06	9.43808e-06	TRIM63	protein_coding
ENSG00000176083.17	15.3791	7.33955	1.65983	4.42186	9.78535e-06	6.9705e-05	ZNF683	protein_coding
ENSG00000117676.14	2710.91	1.33274	0.198612	6.71026	1.94279e-11	3.31259e-10	RPS6KA1	protein_coding
ENSG00000204160.12	1198.94	-1.26363	0.210255	-6.00996	1.85573e-09	2.41812e-08	ZDHHC18	protein_coding
ENSG00000175793.12	1604.64	2.11028	0.213682	9.87581	5.30028e-23	2.55153e-21	SFN	protein_coding
ENSG00000131910.5	3447.11	2.04637	0.219724	9.31333	1.23885e-20	5.08359e-19	NR0B2	protein_coding
ENSG00000090020.11	1644.68	1.37016	0.210027	6.52372	6.85864e-11	1.09413e-09	SLC9A1	protein_coding
ENSG00000142765.18	2174.68	3.72672	0.2082	17.8997	1.18508e-71	6.09244e-69	SYTL1	protein_coding
ENSG00000174950.11	4.87978	5.6795	2.05906	2.7583	0.00581032	0.0201674	CD164L2	protein_coding
ENSG00000181773.7	352.58	2.01821	0.291601	6.92114	4.48011e-12	8.19258e-11	GPR3	protein_coding
ENSG00000237429.1	30.1852	2.27792	0.660165	3.45053	0.000559493	0.00264616	BX293535.1	antisense
ENSG00000126705.14	2273.8	1.44814	0.225704	6.4161	1.39811e-10	2.12937e-09	AHDC1	protein_coding
ENSG00000000938.13	4.00105	5.39774	2.15326	2.50677	0.012184	0.0374946	FGR	protein_coding
ENSG00000126709.15	622.579	2.59439	0.25446	10.1957	2.07303e-24	1.09678e-22	IFI6	protein_coding
ENSG00000117758.14	1152.61	1.9252	0.213131	9.03291	1.67164e-19	6.11373e-18	STX12	protein_coding
ENSG00000169403.12	247.067	5.47926	0.416386	13.1591	1.50883e-39	2.02518e-37	PTAFR	protein_coding
ENSG00000270605.1	159.122	1.46235	0.31983	4.57229	4.82432e-06	3.65033e-05	AL353622.1	antisense
ENSG00000130766.5	2981.05	1.77082	0.211093	8.38882	4.91057e-17	1.46548e-15	SESN2	protein_coding
ENSG00000180198.16	3307.09	-1.68248	0.214271	-7.8521	4.09118e-15	1.03215e-13	RCC1	protein_coding
ENSG00000197989.14	981.824	-1.19426	0.198755	-6.00868	1.8704e-09	2.43608e-08	SNHG12	antisense
ENSG00000120656.11	401.266	1.51732	0.241545	6.28174	3.34796e-10	4.81891e-09	TAF12	protein_coding
ENSG00000060656.20	7719.64	1.16509	0.191775	6.0753	1.2376e-09	1.66522e-08	PTPRU	protein_coding
ENSG00000230523.1	3.81686	5.32794	2.18098	2.44291	0.0145693	0.043475	LINC01756	lincRNA
ENSG00000228176.1	16.6987	7.45724	1.64489	4.53357	5.79938e-06	4.32091e-05	AC092265.1	lincRNA
ENSG00000186056.10	33.3723	1.65898	0.630601	2.63079	0.00851872	0.0278177	MATN1-AS1	antisense
ENSG00000162511.8	1418.35	7.24428	0.308217	23.5038	3.72594e-122	1.01521e-118	LAPTM5	protein_coding
ENSG00000060688.13	1762.21	-1.20442	0.195068	-6.17435	6.64378e-10	9.23117e-09	SNRNP40	protein_coding
ENSG00000229167.1	253.029	3.34399	0.310912	10.7554	5.58822e-27	3.55753e-25	AC114488.1	antisense
ENSG00000121764.11	9.14051	6.59018	1.79255	3.67643	0.00023652	0.0012341	HCRTR1	protein_coding
ENSG00000084636.18	1220.26	-1.08375	0.229858	-4.71486	2.41872e-06	1.9315e-05	COL16A1	protein_coding
ENSG00000121753.12	42.8286	5.34654	0.901017	5.93389	2.95839e-09	3.77552e-08	ADGRB2	protein_coding
ENSG00000134668.12	19.1298	3.26478	0.903862	3.61204	0.0003038	0.0015406	SPOCD1	protein_coding
ENSG00000121775.18	318.576	-1.9089	0.267572	-7.13417	9.73715e-13	1.93232e-11	TMEM39B	protein_coding
ENSG00000220785.7	80.5975	3.07924	0.461492	6.67235	2.51743e-11	4.24459e-10	MTMR9LP	transcribed_unprocessed_pseudogene
ENSG00000162526.7	85.2302	1.654	0.44268	3.73633	0.000186725	0.0010025	TSSK3	protein_coding
ENSG00000116514.16	2048.6	1.95322	0.187997	10.3896	2.76412e-25	1.57232e-23	RNF19B	protein_coding
ENSG00000279179.1	14.8838	2.24587	0.930723	2.41304	0.0158201	0.0465585	AL662907.2	TEC
ENSG00000121904.17	12.1208	5.52208	1.70652	3.23588	0.0012127	0.00522491	CSMD2	protein_coding
ENSG00000189280.3	6.86069	6.17061	1.91251	3.22644	0.00125342	0.00537064	GJB5	protein_coding
ENSG00000196182.10	3142.39	-1.16733	0.209332	-5.57644	2.45496e-08	2.76635e-07	STK40	protein_coding
ENSG00000181817.6	591.904	-1.18526	0.282846	-4.19047	2.78376e-05	0.000179737	LSM10	protein_coding
ENSG00000116885.18	52.6985	2.47615	0.531146	4.6619	3.13306e-06	2.45729e-05	OSCP1	protein_coding
ENSG00000119535.17	317.094	1.07324	0.264894	4.05157	5.08756e-05	0.000310879	CSF3R	protein_coding
ENSG00000163879.11	18.3935	2.16974	0.832476	2.60637	0.00915074	0.0295275	DNALI1	protein_coding
ENSG00000183317.17	36.8342	3.09251	0.656298	4.71206	2.45231e-06	1.95489e-05	EPHA10	protein_coding
ENSG00000185090.14	798.383	-2.76678	0.225759	-12.2554	1.57097e-34	1.60315e-32	MANEAL	protein_coding
ENSG00000185668.7	174.609	5.91812	0.530658	11.1524	6.96915e-29	5.01025e-27	POU3F1	protein_coding
ENSG00000224592.5	136.646	3.61161	0.387766	9.31388	1.23244e-20	5.06492e-19	AL139158.2	lincRNA
ENSG00000158315.11	82.8236	-2.88746	0.444239	-6.49978	8.04373e-11	1.26907e-09	RHBDL2	protein_coding
ENSG00000183682.8	77.8651	5.19877	0.64444	8.06711	7.19801e-16	1.94761e-14	BMP8A	protein_coding
ENSG00000116985.12	171.128	1.68527	0.314543	5.35783	8.42255e-08	8.6339e-07	BMP8B	protein_coding
ENSG00000049089.15	2981.28	1.35703	0.19738	6.87524	6.18849e-12	1.11257e-10	COL9A2	protein_coding
ENSG00000187801.15	183.773	-2.49775	0.311141	-8.02773	9.92932e-16	2.65239e-14	ZFP69B	protein_coding
ENSG00000260920.2	79.8583	-2.86031	0.472134	-6.05825	1.37611e-09	1.83798e-08	AL031985.3	sense_overlapping
ENSG00000179862.6	271.109	1.27355	0.273844	4.65063	3.30927e-06	2.58582e-05	CITED4	protein_coding
ENSG00000010803.16	1990.79	-1.32312	0.203623	-6.49789	8.14549e-11	1.28363e-09	SCMH1	protein_coding
ENSG00000204060.7	12.4054	2.56402	1.06661	2.4039	0.0162212	0.0475195	FOXO6	protein_coding
ENSG00000044012.4	232.644	9.81423	1.46202	6.71279	1.90932e-11	3.25961e-10	GUCA2B	protein_coding
ENSG00000197273.4	11.6597	2.7154	1.11486	2.43564	0.0148654	0.04422	GUCA2A	protein_coding
ENSG00000177181.15	200.093	-2.57715	0.312915	-8.23594	1.78158e-16	5.07239e-15	RIMKLA	protein_coding
ENSG00000117394.21	26594	-1.7491	0.178039	-9.82421	8.85667e-23	4.17505e-21	SLC2A1	protein_coding
ENSG00000284138.1	112.781	-1.94671	0.379004	-5.13638	2.80086e-07	2.63155e-06	ATP6V0CP4	processed_pseudogene
ENSG00000283973.1	13.803	-3.75692	1.11483	-3.36994	0.000751859	0.00344301	AC099795.1	lincRNA
ENSG00000186973.11	28.4844	1.92015	0.669558	2.86779	0.00413351	0.015063	FAM183A	protein_coding
ENSG00000243710.7	14.9287	2.62966	0.968428	2.71539	0.00661969	0.0224858	CFAP57	protein_coding
ENSG00000253313.5	59.9386	3.74629	0.615827	6.08335	1.17697e-09	1.586e-08	C1orf210	protein_coding
ENSG00000132768.14	1182.77	-1.11238	0.208207	-5.34268	9.15811e-08	9.33175e-07	DPH2	protein_coding
ENSG00000196517.11	407.525	-1.6646	0.256717	-6.48418	8.9213e-11	1.39861e-09	SLC6A9	protein_coding
ENSG00000230615.6	23.2067	2.4418	0.756024	3.2298	0.00123879	0.00531881	AL139220.2	lincRNA
ENSG00000187147.18	2445.17	-1.15438	0.190931	-6.04607	1.48424e-09	1.97178e-08	RNF220	protein_coding
ENSG00000263381.1	3.85114	-5.4605	2.18943	-2.49402	0.0126305	0.0386807	MIR5584	miRNA
ENSG00000126106.14	200.948	-1.76551	0.315578	-5.59452	2.21232e-08	2.51372e-07	TMEM53	protein_coding
ENSG00000173846.13	1870.92	2.58556	0.240147	10.7666	4.95018e-27	3.16614e-25	PLK3	protein_coding
ENSG00000222009.8	1096.36	3.16443	0.215647	14.6741	9.4437e-49	1.77457e-46	BTBD19	protein_coding
ENSG00000162415.7	1048.08	-1.02908	0.20567	-5.00354	5.62879e-07	5.02845e-06	ZSWIM5	protein_coding
ENSG00000132773.12	543.722	-1.15199	0.228186	-5.04848	4.45349e-07	4.05833e-06	TOE1	protein_coding
ENSG00000280670.3	188.002	-1.66407	0.314481	-5.29149	1.21323e-07	1.21622e-06	CCDC163	protein_coding
ENSG00000117448.13	2063.06	-1.07455	0.220706	-4.86868	1.12346e-06	9.53346e-06	AKR1A1	protein_coding
ENSG00000086015.21	2703.57	-1.62778	0.196257	-8.29413	1.09382e-16	3.18071e-15	MAST2	protein_coding
ENSG00000117472.10	163.811	4.1881	0.398595	10.5072	8.00674e-26	4.77373e-24	TSPAN1	protein_coding
ENSG00000171357.6	38.9896	6.21634	1.1492	5.40928	6.32789e-08	6.65185e-07	LURAP1	protein_coding
ENSG00000162456.9	4.3302	5.50888	2.11045	2.61029	0.00904663	0.029247	KNCN	protein_coding
ENSG00000162366.8	13.1565	-5.77369	1.6667	-3.46415	0.000531911	0.00253152	PDZK1IP1	protein_coding
ENSG00000123473.15	1103.09	-1.14785	0.206294	-5.56413	2.63458e-08	2.95653e-07	STIL	protein_coding
ENSG00000237424.1	113.329	-1.45014	0.362231	-4.00335	6.24527e-05	0.000374483	FOXD2-AS1	lincRNA
ENSG00000225028.1	9.91354	6.70932	1.78421	3.76039	0.000169649	0.000920619	AC096541.1	lincRNA
ENSG00000117834.12	835.781	-3.03856	0.275202	-11.0412	2.41856e-28	1.67255e-26	SLC5A9	protein_coding
ENSG00000132122.12	200.911	1.02032	0.296929	3.43626	0.000589804	0.00277463	SPATA6	protein_coding
ENSG00000123080.11	260.304	-1.90433	0.317455	-5.99875	1.98839e-09	2.58604e-08	CDKN2C	protein_coding
ENSG00000085831.15	57.8832	1.62754	0.49201	3.30795	0.000939832	0.00417947	TTC39A	protein_coding
ENSG00000227742.2	9.50289	6.64131	1.79369	3.70258	0.000213414	0.00112933	CALR4P	transcribed_unitary_pseudogene
ENSG00000169213.7	628.632	1.57795	0.243765	6.47324	9.5923e-11	1.49777e-09	RAB3B	protein_coding
ENSG00000117862.12	424.67	-1.09899	0.263048	-4.17791	2.94199e-05	0.000189102	TXNDC12	protein_coding
ENSG00000157077.14	1248.72	-1.14492	0.207721	-5.51182	3.55138e-08	3.88768e-07	ZFYVE9	protein_coding
ENSG00000085840.13	838.748	-1.35772	0.209897	-6.4685	9.89824e-11	1.54201e-09	ORC1	protein_coding
ENSG00000203995.9	11.3114	4.37306	1.42154	3.07628	0.00209598	0.00839596	ZYG11A	protein_coding
ENSG00000236360.2	34.6136	1.4532	0.604598	2.40358	0.0162356	0.0475463	AL445183.3	processed_pseudogene
ENSG00000157184.7	1089.82	1.88828	0.201913	9.35195	8.60487e-21	3.60149e-19	CPT2	protein_coding
ENSG00000157193.16	1453.61	-3.64894	0.198714	-18.3627	2.61076e-75	1.54642e-72	LRP8	protein_coding
ENSG00000225030.1	15.3989	-5.00244	1.31427	-3.80626	0.000141086	0.000780226	AL355483.1	sense_intronic
ENSG00000211452.10	69.7368	-2.99902	0.520452	-5.76233	8.29622e-09	9.9756e-08	DIO1	protein_coding
ENSG00000203985.11	877.83	4.54335	0.237417	19.1366	1.25279e-81	9.22561e-79	LDLRAD1	protein_coding
ENSG00000116209.11	2819.3	1.16224	0.182342	6.37393	1.8424e-10	2.75672e-09	TMEM59	protein_coding
ENSG00000162390.17	275.922	-1.28823	0.273071	-4.71755	2.38701e-06	1.90953e-05	ACOT11	protein_coding
ENSG00000162391.12	20.1856	-3.5396	0.966852	-3.66096	0.000251274	0.00130087	FAM151A	protein_coding
ENSG00000242396.1	21.9148	1.80045	0.751065	2.3972	0.0165208	0.0482777	AC096536.2	antisense
ENSG00000169174.10	2722.7	-4.25703	0.243903	-17.4538	3.22293e-68	1.27268e-65	PCSK9	protein_coding
ENSG00000234810.3	6.20239	6.02838	1.93133	3.12135	0.00180021	0.00736487	AL603840.1	lincRNA
ENSG00000260971.4	34.8343	-1.80157	0.598377	-3.01075	0.002606	0.0101205	AC119674.1	lincRNA
ENSG00000284686.1	19.8278	-2.04763	0.811796	-2.52235	0.0116575	0.0361437	AC119674.2	protein_coding
ENSG00000162407.9	1256.19	-1.51951	0.193583	-7.84937	4.18143e-15	1.05394e-13	PLPP3	protein_coding
ENSG00000162409.11	2266.91	-1.21832	0.197905	-6.15609	7.45609e-10	1.03125e-08	PRKAA2	protein_coding
ENSG00000187889.13	313.82	2.0266	0.277743	7.29666	2.94992e-13	6.24526e-12	FYB2	protein_coding
ENSG00000157131.10	133.098	-3.12688	0.369742	-8.45692	2.74539e-17	8.42972e-16	C8A	protein_coding
ENSG00000021852.13	52.4386	-1.78579	0.542789	-3.29002	0.00100179	0.00442683	C8B	protein_coding
ENSG00000173406.15	20.3163	2.33463	0.798623	2.92331	0.00346326	0.0129637	DAB1	protein_coding
ENSG00000162601.10	4130.41	1.12375	0.208008	5.40246	6.5732e-08	6.89641e-07	MYSM1	protein_coding
ENSG00000237352.3	5.06398	5.73441	2.02951	2.82551	0.00472052	0.0169037	LINC01358	lincRNA
ENSG00000162599.16	2066.09	-1.44729	0.181114	-7.99102	1.33826e-15	3.52306e-14	NFIA	protein_coding
ENSG00000132854.19	1424.71	-1.65323	0.217528	-7.60007	2.9597e-14	6.87494e-13	KANK4	protein_coding
ENSG00000162607.13	2519.04	-1.08009	0.187624	-5.75668	8.57854e-09	1.02788e-07	USP1	protein_coding
ENSG00000224209.7	4.55064	5.58109	2.0812	2.68167	0.00732549	0.0244575	LINC00466	processed_transcript
ENSG00000079739.17	2329.24	-2.0075	0.20644	-9.72437	2.37375e-22	1.09437e-20	PGM1	protein_coding
ENSG00000185483.12	60.7422	1.20957	0.463059	2.61213	0.00899798	0.029152	ROR1	protein_coding
ENSG00000158966.15	26.2176	1.9412	0.69309	2.80079	0.00509769	0.0180152	CACHD1	protein_coding
ENSG00000162437.14	578.456	-1.299	0.226733	-5.7292	1.00904e-08	1.19536e-07	RAVER2	protein_coding
ENSG00000226891.8	20.6215	4.67936	1.1	4.25397	2.10013e-05	0.000139058	LINC01359	processed_transcript
ENSG00000162433.15	4093.46	-1.54719	0.192891	-8.02109	1.04808e-15	2.79151e-14	AK4	protein_coding
ENSG00000118473.22	7.26832	6.25949	1.87031	3.34676	0.000817617	0.0037006	SGIP1	protein_coding
ENSG00000152763.17	49.3816	1.45727	0.523045	2.78613	0.00533414	0.0187438	WDR78	protein_coding
ENSG00000081985.11	18.9001	7.63553	1.62461	4.69992	2.60261e-06	2.06564e-05	IL12RB2	protein_coding
ENSG00000142864.14	17278.1	-1.01819	0.179343	-5.6773	1.36838e-08	1.59813e-07	SERBP1	protein_coding
ENSG00000116717.13	1989.63	1.67538	0.185752	9.01943	1.89071e-19	6.87801e-18	GADD45A	protein_coding
ENSG00000172380.6	100.658	3.58436	0.443668	8.07892	6.53438e-16	1.77333e-14	GNG12	protein_coding
ENSG00000223883.1	38.8541	8.67331	1.55883	5.56398	2.63686e-08	2.95787e-07	LINC01707	lincRNA
ENSG00000033122.19	15.63	5.89609	1.64941	3.57467	0.00035067	0.00174995	LRRC7	protein_coding
ENSG00000197568.14	40.711	1.32187	0.549723	2.40462	0.0161893	0.0474415	HHLA3	protein_coding
ENSG00000116761.11	326.063	-3.7286	0.295823	-12.6042	2.00297e-36	2.28346e-34	CTH	protein_coding
ENSG00000229956.10	55.6547	1.76701	0.514863	3.432	0.000599156	0.00281081	ZRANB2-AS2	processed_transcript
ENSG00000137968.16	1403.59	2.34698	0.218394	10.7465	6.15528e-27	3.90939e-25	SLC44A5	protein_coding
ENSG00000184005.11	4.84355	5.66966	2.0552	2.75869	0.00580334	0.0201585	ST6GALNAC3	protein_coding
ENSG00000226415.1	203.214	-1.06483	0.305134	-3.48969	0.000483572	0.00232707	TPI1P1	processed_pseudogene
ENSG00000154027.19	5.46861	5.84717	1.98699	2.94273	0.00325334	0.0122878	AK5	protein_coding
ENSG00000235927.4	12.5344	2.82329	1.06231	2.6577	0.00786755	0.0260154	NEXN-AS1	antisense
ENSG00000162614.18	69.8839	1.52137	0.448962	3.38865	0.000702381	0.0032481	NEXN	protein_coding
ENSG00000285782.1	4.18224	5.45598	2.15357	2.53346	0.0112943	0.035206	AC116099.1	lincRNA
ENSG00000271576.1	89.1084	-1.18934	0.404254	-2.94207	0.00326024	0.0123036	AL359504.2	lincRNA
ENSG00000203943.8	9.55679	3.4868	1.35977	2.56425	0.0103398	0.0327212	SAMD13	protein_coding
ENSG00000285851.1	28.6721	2.91397	0.725203	4.01814	5.86594e-05	0.000354126	AL359762.3	processed_transcript
ENSG00000117151.13	282.986	1.13016	0.266993	4.23291	2.30686e-05	0.000151492	CTBS	protein_coding
ENSG00000284882.1	8.23431	3.89363	1.50933	2.5797	0.00988856	0.0315164	AL359762.1	bidirectional_promoter_lncRNA
ENSG00000117155.16	455.027	-1.79356	0.26306	-6.81807	9.22699e-12	1.63677e-10	SSX2IP	protein_coding
ENSG00000153898.13	3.8561	5.34912	2.22107	2.40835	0.0160246	0.0470346	MCOLN2	protein_coding
ENSG00000162643.13	128.801	10.4039	1.48612	7.00073	2.54638e-12	4.79484e-11	WDR63	protein_coding
ENSG00000055732.13	49.7732	5.56053	0.860758	6.46003	1.04679e-10	1.62333e-09	MCOLN3	protein_coding
ENSG00000282057.1	28.596	1.94898	0.741432	2.62868	0.00857179	0.0279774	AC092807.3	lincRNA
ENSG00000171502.15	39.264	1.95862	0.591377	3.31196	0.000926464	0.00412811	COL24A1	protein_coding
ENSG00000137975.8	36.9997	6.13736	1.16565	5.26517	1.40059e-07	1.38619e-06	CLCA2	protein_coding
ENSG00000236915.2	21.8287	2.8899	0.830591	3.47933	0.000502665	0.00240874	CLCA4-AS1	antisense
ENSG00000143013.13	1173.28	-1.15327	0.192481	-5.9916	2.07783e-09	2.69593e-08	LMO4	protein_coding
ENSG00000233593.9	205.716	-1.11827	0.285766	-3.91323	9.1068e-05	0.00052671	LINC02609	processed_transcript
ENSG00000239794.3	52.7274	1.44861	0.518601	2.79329	0.00521746	0.0183954	RN7SL653P	misc_RNA
ENSG00000137948.18	5.72528	5.9129	1.96641	3.00695	0.00263885	0.0102321	BRDT	protein_coding
ENSG00000189195.13	123.736	2.64725	0.374219	7.07406	1.50467e-12	2.92842e-11	BTBD8	protein_coding
ENSG00000162676.12	222.24	-2.21394	0.290416	-7.62334	2.47196e-14	5.77645e-13	GFI1	protein_coding
ENSG00000154511.12	377.499	-1.59271	0.25986	-6.12911	8.837e-10	1.2124e-08	DIPK1A	protein_coding
ENSG00000122483.17	910.099	1.05021	0.212192	4.94932	7.44732e-07	6.5142e-06	CCDC18	protein_coding
ENSG00000223745.7	289.689	1.99391	0.28962	6.88456	5.7967e-12	1.04598e-10	CCDC18-AS1	processed_transcript
ENSG00000137936.18	381.52	-1.26854	0.251751	-5.03887	4.68288e-07	4.25173e-06	BCAR3	protein_coding
ENSG00000224093.5	1696.77	1.18714	0.203605	5.83059	5.52328e-09	6.79733e-08	AL109613.1	antisense
ENSG00000235501.5	170.801	-1.1431	0.305729	-3.73891	0.000184819	0.000993639	AC105942.1	antisense
ENSG00000162627.17	535.855	-1.31774	0.233626	-5.64036	1.69693e-08	1.9542e-07	SNX7	protein_coding
ENSG00000099260.11	438.526	-1.26043	0.272682	-4.62233	3.79459e-06	2.93142e-05	PALMD	protein_coding
ENSG00000156869.13	391.179	-1.70959	0.239582	-7.13571	9.62896e-13	1.91225e-11	FRRS1	protein_coding
ENSG00000156875.14	177.264	-1.19653	0.325161	-3.67982	0.000233397	0.00121904	MFSD14A	protein_coding
ENSG00000183298.5	514.366	-1.07258	0.275931	-3.88711	0.000101443	0.00058031	RPSAP19	processed_pseudogene
ENSG00000060718.22	13.1475	5.64106	1.68296	3.35186	0.000802696	0.00364032	COL11A1	protein_coding
ENSG00000162631.18	4.07353	5.42124	2.14345	2.52922	0.0114317	0.0355531	NTNG1	protein_coding
ENSG00000134215.16	562.589	-1.92259	0.23665	-8.12421	4.50272e-16	1.23839e-14	VAV3	protein_coding
ENSG00000085491.17	690.514	-1.67793	0.209639	-8.00392	1.20525e-15	3.19449e-14	SLC25A24	protein_coding
ENSG00000116266.11	1572.85	1.52132	0.209626	7.25727	3.94973e-13	8.2534e-12	STXBP3	protein_coding
ENSG00000085433.15	481.483	1.18142	0.232287	5.08606	3.65576e-07	3.3823e-06	WDR47	protein_coding
ENSG00000273382.1	42.1912	1.59046	0.585787	2.71507	0.00662611	0.0225025	AL356488.3	antisense
ENSG00000116299.17	33.101	3.90533	0.771054	5.06492	4.08566e-07	3.74443e-06	KIAA1324	protein_coding
ENSG00000134222.16	595.995	-1.30505	0.282654	-4.61713	3.89075e-06	3.00145e-05	PSRC1	protein_coding
ENSG00000143028.9	43.0032	1.85955	0.556883	3.3392	0.000840186	0.0037889	SYPL2	protein_coding
ENSG00000162650.16	176.81	-1.02026	0.303589	-3.36065	0.000777598	0.0035442	ATXN7L2	protein_coding
ENSG00000116337.16	1531.05	-1.28556	0.232644	-5.52586	3.27885e-08	3.61842e-07	AMPD2	protein_coding
ENSG00000168765.17	415.127	-1.9047	0.27589	-6.90383	5.06181e-12	9.1946e-11	GSTM4	protein_coding
ENSG00000134202.10	603.419	-1.17032	0.242536	-4.82533	1.39773e-06	1.16919e-05	GSTM3	protein_coding
ENSG00000198758.10	1101.69	-1.90063	0.224493	-8.46636	2.53185e-17	7.78616e-16	EPS8L3	protein_coding
ENSG00000235005.1	8.77801	5.04143	1.78228	2.82864	0.0046747	0.0167616	AL450468.1	antisense
ENSG00000261055.1	32.8271	3.40344	0.713521	4.76993	1.84287e-06	1.50411e-05	AL450468.2	lincRNA
ENSG00000184371.14	1749.69	1.98927	0.198953	9.99872	1.54385e-23	7.69019e-22	CSF1	protein_coding
ENSG00000116396.14	1743.15	1.45308	0.189023	7.68729	1.50286e-14	3.55454e-13	KCNC4	protein_coding
ENSG00000177301.15	4.29396	5.49786	2.11192	2.60325	0.00923453	0.0296959	KCNA2	protein_coding
ENSG00000173947.14	39.3594	2.28426	0.587026	3.89124	9.97351e-05	0.00057114	PIFO	protein_coding
ENSG00000197852.11	1651.92	2.10063	0.189229	11.101	1.24049e-28	8.75641e-27	INKA2	protein_coding
ENSG00000227811.2	59.5389	3.04071	0.522432	5.8203	5.87423e-09	7.19026e-08	INKA2-AS1	bidirectional_promoter_lncRNA
ENSG00000143079.15	960.793	1.12824	0.197162	5.72243	1.05013e-08	1.24296e-07	CTTNBP2NL	protein_coding
ENSG00000155366.16	2722.62	1.68445	0.217516	7.74401	9.63272e-15	2.33093e-13	RHOC	protein_coding
ENSG00000155367.15	24.8236	2.9441	0.816428	3.60607	0.000310866	0.00157263	PPM1J	protein_coding
ENSG00000233839.1	4.00105	5.39774	2.15326	2.50677	0.012184	0.0374946	AL357055.1	processed_pseudogene
ENSG00000134242.16	3.85309	5.34033	2.17896	2.45086	0.0142516	0.0427283	PTPN22	protein_coding
ENSG00000118655.6	495.082	-1.05076	0.23419	-4.48677	7.2311e-06	5.27089e-05	DCLRE1B	protein_coding
ENSG00000235527.6	14.392	2.376	0.952693	2.49398	0.0126319	0.0386807	HIPK1-AS1	antisense
ENSG00000116774.12	153.796	-2.37992	0.394961	-6.02572	1.68361e-09	2.21504e-08	OLFML3	protein_coding
ENSG00000175984.15	28.0616	3.00618	0.735346	4.08812	4.3489e-05	0.000269367	DENND2C	protein_coding
ENSG00000198765.12	3.96481	5.38582	2.16321	2.48974	0.0127837	0.0390667	SYCP1	protein_coding
ENSG00000173218.15	1001.98	-1.4515	0.201634	-7.1987	6.07875e-13	1.2388e-11	VANGL1	protein_coding
ENSG00000118729.11	3.70814	5.29009	2.20913	2.39465	0.0166363	0.0485684	CASQ2	protein_coding
ENSG00000203865.9	85.8647	1.21133	0.418743	2.89279	0.0038184	0.0141014	ATP1A1-AS1	processed_transcript
ENSG00000134247.10	1549.98	-1.53178	0.193691	-7.90834	2.6085e-15	6.71775e-14	PTGFRN	protein_coding
ENSG00000183508.5	54.2332	3.70004	0.582076	6.35662	2.06237e-10	3.05398e-09	TENT5C	protein_coding
ENSG00000155761.13	16.1403	5.9413	1.66028	3.5785	0.000345572	0.0017264	SPAG17	protein_coding
ENSG00000092607.15	174.929	2.63524	0.32465	8.11717	4.77191e-16	1.30937e-14	TBX15	protein_coding
ENSG00000232650.5	63.7701	1.33528	0.461657	2.89237	0.00382352	0.0141126	LINC01780	lincRNA
ENSG00000226443.3	28.2308	8.21754	1.5751	5.21716	1.81691e-07	1.77121e-06	GAPDHP32	processed_pseudogene
ENSG00000239873.2	33.5847	8.46642	1.55068	5.45983	4.76601e-08	5.11862e-07	GAPDHP27	processed_pseudogene
ENSG00000203855.7	5.98196	5.97577	1.94781	3.06794	0.00215541	0.00859734	HSD3BP4	unprocessed_pseudogene
ENSG00000240244.3	104.143	7.6495	1.08434	7.05449	1.73231e-12	3.3357e-11	GAPDHP33	processed_pseudogene
ENSG00000260941.1	156.69	10.6868	1.48112	7.21538	5.37821e-13	1.10847e-11	LINC00622	sense_overlapping
ENSG00000198857.3	325.003	8.7083	0.869806	10.0118	1.35298e-23	6.78909e-22	HSD3BP5	transcribed_unprocessed_pseudogene
ENSG00000092621.12	3405.07	-4.52562	0.217959	-20.7637	9.22831e-96	9.67091e-93	PHGDH	protein_coding
ENSG00000272150.5	97.5062	1.43277	0.380779	3.76272	0.000168075	0.000913535	NBPF25P	transcribed_unprocessed_pseudogene
ENSG00000143127.13	78.8323	-2.60151	0.449848	-5.78308	7.3345e-09	8.88586e-08	ITGA10	protein_coding
ENSG00000271601.4	631.173	-1.37359	0.212136	-6.47506	9.47754e-11	1.4824e-09	LIX1L	protein_coding
ENSG00000121851.13	128.909	1.07005	0.341753	3.13106	0.00174174	0.00716858	POLR3GL	protein_coding
ENSG00000265972.5	1684.2	4.09751	0.25554	16.0347	7.30971e-58	1.95263e-55	TXNIP	protein_coding
ENSG00000233396.7	84.128	1.21935	0.401169	3.03949	0.00236977	0.00932137	LINC01719	lincRNA
ENSG00000276975.3	7.9991	6.39336	1.84325	3.46853	0.000523306	0.00249482	HYDIN2	transcribed_unprocessed_pseudogene
ENSG00000131781.13	735.896	-1.35268	0.210185	-6.43565	1.22943e-10	1.89256e-09	FMO5	protein_coding
ENSG00000226015.2	102.848	-1.06201	0.371677	-2.85735	0.00427191	0.0154907	CCT8P1	processed_pseudogene
ENSG00000131778.19	238.97	-1.02244	0.297726	-3.43419	0.000594338	0.00279254	CHD1L	protein_coding
ENSG00000116128.11	585.225	-1.9701	0.230565	-8.54463	1.28945e-17	4.05231e-16	BCL9	protein_coding
ENSG00000265107.3	5.02774	5.72499	2.02926	2.82123	0.00478406	0.0170773	GJA5	protein_coding
ENSG00000227733.9	11.7797	6.9528	1.72288	4.03558	5.44683e-05	0.000330682	AC239809.3	lincRNA
ENSG00000203814.6	3681.72	-2.46687	0.25802	-9.56078	1.16877e-21	5.1697e-20	HIST2H2BF	protein_coding
ENSG00000183598.3	1080.37	-2.43815	0.28919	-8.43095	3.42862e-17	1.038e-15	HIST2H3D	protein_coding
ENSG00000270882.2	159.141	-1.41075	0.337	-4.1862	2.83667e-05	0.000183023	HIST2H4A	protein_coding
ENSG00000203811.1	1567.64	-1.22305	0.267662	-4.56936	4.89215e-06	3.69652e-05	HIST2H3C	protein_coding
ENSG00000203812.2	4087.96	-1.66014	0.252379	-6.57799	4.76863e-11	7.7432e-10	HIST2H2AA3	protein_coding
ENSG00000203852.3	306.398	-1.09697	0.340149	-3.22496	0.00125991	0.00539591	HIST2H3A	protein_coding
ENSG00000270276.2	1724.43	-1.34865	0.277022	-4.86838	1.12515e-06	9.54453e-06	HIST2H4B	protein_coding
ENSG00000184678.10	7675.53	-1.43503	0.254717	-5.63381	1.76267e-08	2.02647e-07	HIST2H2BE	protein_coding
ENSG00000184260.5	7979.03	-1.082	0.26125	-4.14165	3.44822e-05	0.000218142	HIST2H2AC	protein_coding
ENSG00000184270.5	2540.05	-2.09093	0.267167	-7.82633	5.02324e-15	1.24635e-13	HIST2H2AB	protein_coding
ENSG00000023902.14	483.317	-2.16166	0.241862	-8.93758	3.97798e-19	1.4113e-17	PLEKHO1	protein_coding
ENSG00000143401.15	2252.17	-1.91303	0.18333	-10.4349	1.71786e-25	1.00228e-23	ANP32E	protein_coding
ENSG00000118298.12	48.9167	-2.7751	0.55313	-5.01708	5.24622e-07	4.72542e-06	CA14	protein_coding
ENSG00000143369.15	97.7625	2.17245	0.409127	5.30995	1.09653e-07	1.10697e-06	ECM1	protein_coding
ENSG00000228126.1	46.3795	2.7681	0.562614	4.92006	8.65166e-07	7.50499e-06	FALEC	lincRNA
ENSG00000143382.14	2152.74	1.35512	0.197956	6.84553	7.61916e-12	1.35952e-10	ADAMTSL4	protein_coding
ENSG00000197622.13	1118.73	1.12574	0.192272	5.85495	4.77162e-09	5.93393e-08	CDC42SE1	protein_coding
ENSG00000143416.21	485.531	-1.34342	0.272544	-4.9292	8.2568e-07	7.18534e-06	SELENBP1	protein_coding
ENSG00000143375.15	119.91	1.18356	0.344963	3.43099	0.000601383	0.00281835	CGN	protein_coding
ENSG00000159409.14	124.374	8.90993	1.47686	6.03301	1.60931e-09	2.12652e-08	CELF3	protein_coding
ENSG00000178796.12	46.9407	8.94854	1.52384	5.87236	4.29644e-09	5.37736e-08	RIIAD1	protein_coding
ENSG00000182134.16	305.709	1.3831	0.253887	5.4477	5.10252e-08	5.44782e-07	TDRKH	protein_coding
ENSG00000143365.18	42.8248	-2.59802	0.603864	-4.30233	1.69011e-05	0.000114071	RORC	protein_coding
ENSG00000159445.13	306.973	-1.02575	0.252821	-4.0572	4.96643e-05	0.000304433	THEM4	protein_coding
ENSG00000163191.6	1390.55	1.17332	0.218733	5.36417	8.13211e-08	8.37082e-07	S100A11	protein_coding
ENSG00000159450.12	5.57733	5.87302	1.98783	2.95448	0.00313192	0.0118835	TCHH	protein_coding
ENSG00000237975.6	179.876	5.83493	0.509179	11.4595	2.10773e-30	1.69408e-28	FLG-AS1	antisense
ENSG00000236427.1	25.3898	3.94444	0.891311	4.42543	9.62485e-06	6.87053e-05	AL589986.2	lincRNA
ENSG00000197915.6	8.51562	5.00703	1.81682	2.75593	0.00585247	0.0202904	HRNR	protein_coding
ENSG00000143631.10	28.5481	6.7757	1.5624	4.33672	1.44626e-05	9.92049e-05	FLG	protein_coding
ENSG00000240386.3	329.101	11.759	1.46405	8.03182	9.60357e-16	2.56789e-14	LCE1F	protein_coding
ENSG00000186226.9	139.001	10.5156	1.47752	7.11705	1.1026e-12	2.16756e-11	LCE1E	protein_coding
ENSG00000172155.9	8.15006	6.42556	1.83423	3.50314	0.000459808	0.00222447	LCE1D	protein_coding
ENSG00000197084.5	240.601	11.3071	1.46751	7.70495	1.3089e-14	3.11201e-13	LCE1C	protein_coding
ENSG00000196734.8	229.666	11.2401	1.46846	7.65434	1.94309e-14	4.56803e-13	LCE1B	protein_coding
ENSG00000197956.10	1716.49	1.1054	0.213414	5.17962	2.22339e-07	2.13614e-06	S100A6	protein_coding
ENSG00000196154.12	95.8661	-1.99999	0.387038	-5.16742	2.37349e-07	2.26429e-06	S100A4	protein_coding
ENSG00000169418.10	13.326	4.02467	1.20365	3.34372	0.000826634	0.00373583	NPR1	protein_coding
ENSG00000231827.3	11.1243	5.3902	1.72449	3.12569	0.00177391	0.00727478	AL513523.2	transcribed_unprocessed_pseudogene
ENSG00000223599.1	78.0605	1.06713	0.422768	2.52414	0.0115981	0.0359965	AL513523.1	processed_pseudogene
ENSG00000163239.12	4.25772	5.48677	2.11613	2.59283	0.00951897	0.0304703	TDRD10	protein_coding
ENSG00000143603.19	6.93333	4.69521	1.86085	2.52316	0.0116307	0.0360854	KCNN3	protein_coding
ENSG00000270361.1	14.1803	2.77265	0.9831	2.82031	0.00479774	0.0171217	AL451085.1	lincRNA
ENSG00000271380.1	39.9322	1.37707	0.561689	2.45165	0.0142203	0.0427047	AL451085.2	antisense
ENSG00000163354.15	20.8264	3.63325	0.909561	3.99451	6.48271e-05	0.000387017	DCST2	protein_coding
ENSG00000143537.13	1383.74	-1.05871	0.220832	-4.7942	1.63327e-06	1.34649e-05	ADAM15	protein_coding
ENSG00000143590.14	31.967	-1.80981	0.637303	-2.8398	0.00451418	0.0162497	EFNA3	protein_coding
ENSG00000169242.12	1975.19	-2.26859	0.244914	-9.26281	1.99119e-20	8.02573e-19	EFNA1	protein_coding
ENSG00000169231.13	87.2409	1.29088	0.416237	3.10131	0.00192669	0.00779807	THBS3	protein_coding
ENSG00000160767.21	983.828	-1.68645	0.218638	-7.71344	1.2247e-14	2.92713e-13	FAM189B	protein_coding
ENSG00000143630.10	233.832	-1.28469	0.302529	-4.2465	2.17136e-05	0.000143252	HCN3	protein_coding
ENSG00000143627.19	209.911	-2.73751	0.33376	-8.20205	2.36322e-16	6.67954e-15	PKLR	protein_coding
ENSG00000160752.14	3863.1	-2.03812	0.232787	-8.75531	2.03546e-18	6.85539e-17	FDPS	protein_coding
ENSG00000225855.6	145.963	1.43673	0.340682	4.21721	2.47348e-05	0.000161155	RUSC1-AS1	antisense
ENSG00000203761.5	110.602	-1.35576	0.43739	-3.09966	0.00193743	0.00782989	MSTO2P	unprocessed_pseudogene
ENSG00000132718.9	137.225	3.92123	0.412043	9.51657	1.78993e-21	7.81572e-20	SYT11	protein_coding
ENSG00000254726.3	1260.36	-1.34273	0.254565	-5.27462	1.33032e-07	1.32702e-06	MEX3A	protein_coding
ENSG00000196189.13	31.8035	2.64458	0.661881	3.99556	6.45425e-05	0.000385486	SEMA4A	protein_coding
ENSG00000160783.19	675.065	-1.62827	0.260374	-6.25358	4.01139e-10	5.71345e-09	PMF1	protein_coding
ENSG00000237390.1	41.4412	2.06008	0.585065	3.5211	0.000429753	0.00209509	AL139130.1	lincRNA
ENSG00000187862.11	20.9718	2.52764	0.79696	3.1716	0.00151603	0.00633934	TTC24	protein_coding
ENSG00000272068.1	96.8065	2.9527	0.422537	6.98801	2.78812e-12	5.23195e-11	AL365181.2	lincRNA
ENSG00000272405.1	2172.24	2.37698	0.190297	12.4909	8.36911e-36	9.30747e-34	AL365181.3	antisense
ENSG00000229953.1	764.55	1.53809	0.23238	6.61887	3.61944e-11	5.99872e-10	AL590666.2	antisense
ENSG00000143320.9	34.1976	3.07896	0.669216	4.60084	4.20791e-06	3.22693e-05	CRABP2	protein_coding
ENSG00000143321.19	7341.33	-1.02093	0.180661	-5.6511	1.59422e-08	1.84293e-07	HDGF	protein_coding
ENSG00000027869.11	512.782	5.00506	0.290334	17.2389	1.355e-66	4.85786e-64	SH2D2A	protein_coding
ENSG00000187800.13	405.995	3.61321	0.268702	13.4469	3.21085e-41	4.72897e-39	PEAR1	protein_coding
ENSG00000132694.18	2400.21	-1.20725	0.186474	-6.4741	9.53781e-11	1.49012e-09	ARHGEF11	protein_coding
ENSG00000229961.3	6.42282	6.07914	1.91621	3.17248	0.00151145	0.0063231	AL357143.1	transcribed_unprocessed_pseudogene
ENSG00000143297.19	5.94572	5.96781	1.94907	3.06188	0.00219952	0.00873493	FCRL5	protein_coding
ENSG00000163564.14	24.876	8.02987	1.60183	5.01295	5.36028e-07	4.81859e-06	PYHIN1	protein_coding
ENSG00000163565.18	5.87024	5.94584	1.97464	3.01111	0.00260297	0.0101131	IFI16	protein_coding
ENSG00000177807.9	722.705	-1.42982	0.214074	-6.67908	2.40455e-11	4.06431e-10	KCNJ10	protein_coding
ENSG00000162729.14	933.025	-2.4265	0.216599	-11.2027	3.95326e-29	2.88006e-27	IGSF8	protein_coding
ENSG00000018625.14	143.997	-4.80541	0.441615	-10.8815	1.41292e-27	9.32153e-26	ATP1A2	protein_coding
ENSG00000158764.7	9.54514	6.65353	1.7842	3.72914	0.000192136	0.00102751	ITLN2	protein_coding
ENSG00000186517.14	75.3944	2.61944	0.460356	5.69004	1.27012e-08	1.48783e-07	ARHGAP30	protein_coding
ENSG00000143217.9	2916.78	3.38594	0.215136	15.7386	8.21906e-56	2.03586e-53	NECTIN4	protein_coding
ENSG00000228917.1	6.93617	6.18935	1.88667	3.28057	0.00103598	0.00455208	AL591806.1	antisense
ENSG00000158850.15	1344.8	-1.08793	0.225232	-4.83025	1.3636e-06	1.14249e-05	B4GALT3	protein_coding
ENSG00000158859.10	187.136	-1.02039	0.301425	-3.38522	0.000711207	0.00328389	ADAMTS4	protein_coding
ENSG00000158874.11	42742.8	-2.04709	0.228409	-8.96238	3.17748e-19	1.13469e-17	APOA2	protein_coding
ENSG00000248485.2	4.22149	5.47558	2.12353	2.57853	0.00992226	0.0316053	PCP4L1	protein_coding
ENSG00000158887.16	510.252	-2.40904	0.23313	-10.3335	4.97329e-25	2.77679e-23	MPZ	protein_coding
ENSG00000283317.1	3.99805	5.38939	2.21332	2.43498	0.0148925	0.0442745	AL831711.1	lincRNA
ENSG00000132185.16	147.308	10.5999	1.47825	7.17054	7.4703e-13	1.50661e-11	FCRLA	protein_coding
ENSG00000185630.18	12.2238	3.0848	1.0908	2.828	0.00468396	0.0167904	PBX1	protein_coding
ENSG00000143179.16	1819.3	-1.74452	0.189553	-9.20332	3.4705e-20	1.36451e-18	UCK2	protein_coding
ENSG00000232148.1	3.88933	5.35264	2.18051	2.45476	0.0140978	0.0424025	FMO11P	unprocessed_pseudogene
ENSG00000232223.1	15.3429	7.33646	1.6607	4.4177	9.97572e-06	7.09683e-05	CNN2P10	processed_pseudogene
ENSG00000143195.13	33.0263	4.61878	0.873259	5.28913	1.22898e-07	1.23156e-06	ILDR2	protein_coding
ENSG00000143194.13	16.2216	7.41542	1.65024	4.49355	7.00465e-06	5.12639e-05	MAEL	protein_coding
ENSG00000143167.12	5.24818	5.78737	2.0071	2.88345	0.00393349	0.0144442	GPA33	protein_coding
ENSG00000198771.11	5.837	5.94364	1.9625	3.02861	0.00245684	0.00961387	RCSD1	protein_coding
ENSG00000197965.12	2139.21	-1.51061	0.183477	-8.23327	1.82172e-16	5.18126e-15	MPZL1	protein_coding
ENSG00000143158.11	879.98	-1.654	0.213617	-7.74283	9.72285e-15	2.34441e-13	MPC2	protein_coding
ENSG00000117479.14	1782.45	-1.3498	0.198347	-6.80521	1.00899e-11	1.7852e-10	SLC19A2	protein_coding
ENSG00000198734.10	9440.1	1.17627	0.173969	6.7614	1.36661e-11	2.3642e-10	F5	protein_coding
ENSG00000174175.17	17.5501	6.06409	1.62495	3.73187	0.000190064	0.00101762	SELP	protein_coding
ENSG00000197959.14	16.6441	2.6123	0.965063	2.70687	0.00679202	0.0229891	DNM3	protein_coding
ENSG00000117586.11	675.358	3.40798	0.233398	14.6016	2.74339e-48	5.05061e-46	TNFSF4	protein_coding
ENSG00000203739.3	137.899	-1.65027	0.342298	-4.82114	1.42737e-06	1.19007e-05	AL645568.1	antisense
ENSG00000117601.13	408.982	-1.5425	0.265759	-5.80413	6.47029e-09	7.88443e-08	SERPINC1	protein_coding
ENSG00000116183.11	16.4235	4.32816	1.15887	3.7348	0.000187865	0.00100783	PAPPA2	protein_coding
ENSG00000152092.16	7.77583	4.86412	1.83148	2.65584	0.00791108	0.0261403	ASTN1	protein_coding
ENSG00000188585.9	4.81031	5.66695	2.07747	2.72782	0.00637552	0.0217877	CLEC20A	protein_coding
ENSG00000213057.5	94.8518	-1.38978	0.380768	-3.64995	0.000262294	0.00135201	C1orf220	lincRNA
ENSG00000116191.17	1328.32	-1.00459	0.208153	-4.8262	1.39165e-06	1.16493e-05	RALGPS2	protein_coding
ENSG00000116194.13	115.505	-2.28245	0.379332	-6.01704	1.77638e-09	2.32585e-08	ANGPTL1	protein_coding
ENSG00000162779.22	25.5009	2.0618	0.754866	2.73134	0.00630767	0.0215965	AXDND1	protein_coding
ENSG00000143337.18	1211.38	-1.1434	0.205204	-5.57203	2.51791e-08	2.83259e-07	TOR1AIP1	protein_coding
ENSG00000116260.17	308.311	-1.1466	0.264017	-4.34291	1.40605e-05	9.66955e-05	QSOX1	protein_coding
ENSG00000236719.3	9.24923	6.60567	1.78564	3.69934	0.000216165	0.00114078	OVAAL	lincRNA
ENSG00000135823.14	2447.29	1.52106	0.179073	8.49408	1.9951e-17	6.18436e-16	STX6	protein_coding
ENSG00000153029.14	2883.49	6.03315	0.214216	28.1638	1.62214e-174	1.47328e-170	MR1	protein_coding
ENSG00000198216.12	17.5775	7.53007	1.6404	4.5904	4.42405e-06	3.37747e-05	CACNA1E	protein_coding
ENSG00000228918.3	6.67365	4.63371	1.90834	2.42814	0.0151763	0.044976	LINC01344	lincRNA
ENSG00000121446.20	8.03834	6.40365	1.83147	3.49645	0.000471498	0.00227419	RGSL1	protein_coding
ENSG00000135824.12	5.42937	5.83221	2.0244	2.88096	0.0039646	0.0145369	RGS8	protein_coding
ENSG00000135838.13	14.3977	2.79507	0.992166	2.81714	0.00484535	0.0172758	NPL	protein_coding
ENSG00000058085.14	12.0815	5.51513	1.69852	3.24702	0.0011662	0.00505012	LAMC2	protein_coding
ENSG00000157064.11	12.8094	7.07544	1.69866	4.16531	3.1093e-05	0.000198452	NMNAT2	protein_coding
ENSG00000143344.15	2334.39	1.38195	0.192938	7.16267	7.91185e-13	1.58627e-11	RGL1	protein_coding
ENSG00000198756.12	730.552	-1.62231	0.228141	-7.111	1.15203e-12	2.25986e-11	COLGALT2	protein_coding
ENSG00000198860.12	802.152	-1.83975	0.252807	-7.27729	3.40603e-13	7.16082e-12	TSEN15	protein_coding
ENSG00000135842.17	18.1988	3.17069	0.947086	3.34783	0.000814456	0.00368813	FAM129A	protein_coding
ENSG00000116668.13	259.633	1.02247	0.325912	3.13725	0.00170539	0.00704153	SWT1	protein_coding
ENSG00000273004.1	58.3692	-1.49175	0.503211	-2.96447	0.00303209	0.0115643	AL078644.2	lincRNA
ENSG00000143341.12	36.269	4.4808	0.822481	5.44792	5.09636e-08	5.44552e-07	HMCN1	protein_coding
ENSG00000230426.3	323.233	2.42863	0.264619	9.17785	4.39782e-20	1.71182e-18	ERVMER61-1	lincRNA
ENSG00000274702.1	10.7982	5.3504	1.72897	3.09455	0.0019711	0.00795299	AL357559.1	processed_pseudogene
ENSG00000162630.5	4.03729	5.40954	2.14675	2.51987	0.0117398	0.0363452	B3GALT2	protein_coding
ENSG00000162687.17	4.66236	5.61968	2.07269	2.7113	0.00670195	0.0227181	KCNT2	protein_coding
ENSG00000000971.15	4.62311	5.60187	2.08403	2.688	0.0071881	0.0241319	CFH	protein_coding
ENSG00000213047.13	329.716	-1.16951	0.252087	-4.63931	3.49572e-06	2.72137e-05	DENND1B	protein_coding
ENSG00000116833.14	32.2404	-1.58278	0.627178	-2.52365	0.0116144	0.0360388	NR5A2	protein_coding
ENSG00000163362.11	1317.06	1.02194	0.231758	4.40954	1.03592e-05	7.33897e-05	INAVA	protein_coding
ENSG00000163395.16	19.2257	2.68157	0.857385	3.12762	0.00176228	0.0072358	IGFN1	protein_coding
ENSG00000174307.6	2075.14	1.07099	0.205696	5.20665	1.92282e-07	1.86445e-06	PHLDA3	protein_coding
ENSG00000159176.14	1428.2	-1.08525	0.229733	-4.72395	2.31312e-06	1.85713e-05	CSRP1	protein_coding
ENSG00000134369.15	20.103	2.77496	0.871333	3.18473	0.00144891	0.00610413	NAV1	protein_coding
ENSG00000234678.2	124.412	-1.13243	0.339919	-3.33148	0.000863869	0.00388349	ELF3-AS1	antisense
ENSG00000143862.8	1105.34	1.56132	0.23676	6.59453	4.26593e-11	6.98521e-10	ARL8A	protein_coding
ENSG00000143851.15	6.4953	6.09385	1.91565	3.1811	0.00146719	0.00616732	PTPN7	protein_coding
ENSG00000243323.7	17.3967	3.99317	1.05404	3.78846	0.000151587	0.000833053	PTPRVP	transcribed_unitary_pseudogene
ENSG00000117153.16	1646.04	1.11761	0.188819	5.91895	3.24011e-09	4.11769e-08	KLHL12	protein_coding
ENSG00000199471.1	13.1927	2.42195	1.00273	2.41534	0.0157204	0.046361	RF00019	misc_RNA
ENSG00000133063.16	4.62311	5.60187	2.08403	2.688	0.0071881	0.0241319	CHIT1	protein_coding
ENSG00000233791.5	15.9901	2.98384	0.985095	3.02898	0.00245377	0.00960325	LINC01136	lincRNA
ENSG00000159388.6	4016.15	3.29307	0.200514	16.4231	1.30692e-60	3.91315e-58	BTG2	protein_coding
ENSG00000143842.15	1003.02	-2.06171	0.221188	-9.32109	1.15154e-20	4.75394e-19	SOX13	protein_coding
ENSG00000261065.1	4.64755	-5.73088	2.07065	-2.76767	0.00564588	0.0196954	AL592146.1	antisense
ENSG00000174567.8	559.487	1.44866	0.23805	6.08552	1.16115e-09	1.56623e-08	GOLT1A	protein_coding
ENSG00000219133.2	67.9536	1.53019	0.473644	3.23067	0.00123502	0.00530515	AL592114.1	processed_pseudogene
ENSG00000133056.13	719.925	-1.09334	0.206786	-5.28731	1.24129e-07	1.24207e-06	PIK3C2B	protein_coding
ENSG00000163531.15	23.3871	6.48459	1.58333	4.09553	4.21203e-05	0.000261484	NFASC	protein_coding
ENSG00000163545.8	638.992	1.66021	0.236806	7.01087	2.36842e-12	4.47781e-11	NUAK2	protein_coding
ENSG00000281406.2	252.19	1.16454	0.277293	4.19966	2.67315e-05	0.000173129	BLACAT1	protein_coding
ENSG00000174514.13	73.5081	3.6521	0.506949	7.20408	5.84364e-13	1.19536e-11	MFSD4A	protein_coding
ENSG00000276600.5	12.5617	3.12177	1.0853	2.87641	0.00402232	0.0147188	RAB7B	protein_coding
ENSG00000263528.8	279.269	-1.10548	0.267139	-4.13821	3.50022e-05	0.000221072	IKBKE	protein_coding
ENSG00000266094.7	85.1348	3.31502	0.479178	6.91815	4.57571e-12	8.35059e-11	RASSF5	protein_coding
ENSG00000279946.1	16.6263	4.96174	1.28265	3.86835	0.000109573	0.000621468	AC244034.3	TEC
ENSG00000224462.2	7.82079	4.86481	1.834	2.65256	0.00798832	0.0263412	C4BPAP1	unprocessed_pseudogene
ENSG00000237074.2	3.88933	5.35264	2.18051	2.45476	0.0140978	0.0424025	AL596218.1	lincRNA
ENSG00000196352.15	1172.77	1.16583	0.229143	5.08778	3.62283e-07	3.35297e-06	CD55	protein_coding
ENSG00000117322.17	6.79122	6.16169	1.89713	3.24791	0.00116256	0.00503599	CR2	protein_coding
ENSG00000203710.11	7.70619	6.34035	1.85101	3.42534	0.000614033	0.00287256	CR1	protein_coding
ENSG00000008118.10	54.1756	7.70503	1.50826	5.10855	3.2464e-07	3.02203e-06	CAMK1G	protein_coding
ENSG00000196878.15	34.4872	4.17292	0.779291	5.35476	8.56689e-08	8.76209e-07	LAMB3	protein_coding
ENSG00000162757.4	53.0115	1.675	0.492209	3.40302	0.000666458	0.00309563	C1orf74	protein_coding
ENSG00000143469.19	14.3857	7.24148	1.67591	4.32091	1.55385e-05	0.000105898	SYT14	protein_coding
ENSG00000054392.13	1163.56	3.26467	0.201974	16.1638	9.07643e-59	2.52353e-56	HHAT	protein_coding
ENSG00000279333.1	98.9852	3.50721	0.435016	8.06226	7.48939e-16	2.02444e-14	AC096636.1	TEC
ENSG00000226986.4	87.7106	-1.54371	0.41926	-3.68197	0.000231436	0.00121082	AC092017.1	processed_pseudogene
ENSG00000153363.12	128.118	2.5843	0.360537	7.16792	7.61485e-13	1.5335e-11	LINC00467	lincRNA
ENSG00000170385.10	4558.76	1.57164	0.200458	7.84022	4.49745e-15	1.12838e-13	SLC30A1	protein_coding
ENSG00000261314.1	3.96481	5.38582	2.16321	2.48974	0.0127837	0.0390667	AC105275.2	sense_overlapping
ENSG00000228792.2	15.8538	2.96687	0.965991	3.07133	0.00213109	0.00851906	AL356310.1	lincRNA
ENSG00000227764.1	9.46687	3.48972	1.30886	2.66623	0.00767076	0.0254388	LINC01693	lincRNA
ENSG00000143493.13	1099.3	-1.59134	0.213335	-7.45932	8.69672e-14	1.94708e-12	INTS7	protein_coding
ENSG00000143476.18	1309.63	-1.20836	0.188557	-6.40848	1.46975e-10	2.23348e-09	DTL	protein_coding
ENSG00000162769.13	1443.08	-1.30004	0.199837	-6.50553	7.7418e-11	1.2264e-09	FLVCR1	protein_coding
ENSG00000143494.15	102.021	-1.2572	0.389723	-3.22589	0.00125582	0.0053801	VASH2	protein_coding
ENSG00000230461.8	189.317	1.86572	0.313878	5.94411	2.77959e-09	3.55565e-08	PROX1-AS1	processed_transcript
ENSG00000281664.1	19.7216	2.73039	0.835042	3.26977	0.00107636	0.00470067	LINC00538	lincRNA
ENSG00000143499.14	1578.39	-1.1368	0.187615	-6.0592	1.36804e-09	1.8281e-08	SMYD2	protein_coding
ENSG00000136636.13	1997.66	-1.62262	0.192374	-8.43471	3.32037e-17	1.00746e-15	KCTD3	protein_coding
ENSG00000042781.13	19.3108	4.14565	1.01411	4.08798	4.35149e-05	0.000269466	USH2A	protein_coding
ENSG00000196482.17	5.98196	5.97577	1.94781	3.06794	0.00215541	0.00859734	ESRRG	protein_coding
ENSG00000162814.11	12.556	2.5736	1.02377	2.51384	0.0119423	0.0368626	SPATA17	protein_coding
ENSG00000196660.10	119.101	-1.941	0.358945	-5.40751	6.39062e-08	6.7152e-07	SLC30A10	protein_coding
ENSG00000136628.18	3379.29	-1.0384	0.228084	-4.55271	5.29583e-06	3.97837e-05	EPRS	protein_coding
ENSG00000116141.15	5.72228	5.90726	2.01806	2.92719	0.00342035	0.0128243	MARK1	protein_coding
ENSG00000117791.16	253.095	1.32746	0.277378	4.78573	1.70366e-06	1.40029e-05	MARC2	protein_coding
ENSG00000186205.13	606.314	-2.1059	0.230334	-9.14279	6.08631e-20	2.3226e-18	MARC1	protein_coding
ENSG00000238078.1	12.4016	-2.48447	1.02954	-2.41319	0.0158134	0.046545	LINC01352	lincRNA
ENSG00000225265.1	23.1921	2.32412	0.761438	3.05228	0.00227111	0.00898256	TAF1A-AS1	antisense
ENSG00000162909.18	543.49	2.28927	0.231418	9.89236	4.49292e-23	2.17827e-21	CAPN2	protein_coding
ENSG00000272645.3	352.658	1.253	0.257831	4.85977	1.17525e-06	9.92928e-06	GTF2IP20	transcribed_unprocessed_pseudogene
ENSG00000237101.1	10.3816	6.76752	1.7918	3.77693	0.000158772	0.000867642	AC092809.4	antisense
ENSG00000143815.15	4618.32	-1.20345	0.175882	-6.8424	7.7878e-12	1.38508e-10	LBR	protein_coding
ENSG00000234476.2	27.0923	6.69832	1.565	4.28006	1.86839e-05	0.000124866	AC092811.1	lincRNA
ENSG00000282418.1	21.4643	4.7479	1.09709	4.3277	1.50675e-05	0.000102945	AC092811.2	lincRNA
ENSG00000143819.12	4850.96	1.07504	0.222426	4.83325	1.34319e-06	1.12678e-05	EPHX1	protein_coding
ENSG00000242861.1	39.0519	2.07862	0.601473	3.45589	0.00054848	0.00260084	AL591895.1	antisense
ENSG00000203685.10	21.5483	7.82743	1.60665	4.87189	1.10533e-06	9.40275e-06	STUM	protein_coding
ENSG00000143772.9	20.0023	7.7179	1.6142	4.78126	1.74197e-06	1.43048e-05	ITPKB	protein_coding
ENSG00000143816.8	115.324	5.97409	0.657597	9.08473	1.03955e-19	3.90684e-18	WNT9A	protein_coding
ENSG00000198835.4	90.3894	-1.53341	0.390393	-3.92787	8.57002e-05	0.000499315	GJC2	protein_coding
ENSG00000154358.20	57.2498	1.37154	0.480066	2.85698	0.00427691	0.0155046	OBSCN	protein_coding
ENSG00000183929.7	26.1488	-3.71467	0.846965	-4.38586	1.15527e-05	8.09609e-05	DUSP5P1	processed_pseudogene
ENSG00000282111.1	5.54109	5.86443	1.98574	2.95327	0.00314427	0.0119221	AL137793.2	lincRNA
ENSG00000168118.11	2401.57	-1.00005	0.181085	-5.52253	3.34143e-08	3.6845e-07	RAB4A	protein_coding
ENSG00000143632.14	97.5223	-2.22778	0.418111	-5.32821	9.91854e-08	1.00802e-06	ACTA1	protein_coding
ENSG00000135776.5	1232.57	-2.32535	0.195436	-11.8983	1.20807e-32	1.10829e-30	ABCB10	protein_coding
ENSG00000135763.10	1186	-1.61674	0.208674	-7.74771	9.35635e-15	2.27213e-13	URB2	protein_coding
ENSG00000135744.8	11631.6	-1.77153	0.235735	-7.51495	5.6932e-14	1.29269e-12	AGT	protein_coding
ENSG00000135773.13	82.3322	3.75623	0.489491	7.67375	1.67045e-14	3.94408e-13	CAPN9	protein_coding
ENSG00000182118.8	71.74	1.19057	0.445815	2.67055	0.00757275	0.0251597	FAM89A	protein_coding
ENSG00000119283.15	14.498	2.39768	0.953463	2.51471	0.0119132	0.0368025	TRIM67	protein_coding
ENSG00000116906.13	2350.6	-1.14912	0.183009	-6.27904	3.40676e-10	4.90095e-09	GNPAT	protein_coding
ENSG00000233461.5	137.705	-1.07873	0.325746	-3.31158	0.000927711	0.00413163	AL445524.1	antisense
ENSG00000286071.1	14.1987	5.75513	1.66826	3.44977	0.000561056	0.00265263	AL136171.1	processed_transcript
ENSG00000116991.10	75.6319	4.02489	0.537246	7.49171	6.79809e-14	1.5365e-12	SIPA1L2	protein_coding
ENSG00000135778.12	2809.06	2.01113	0.189001	10.6409	1.92323e-26	1.1829e-24	NTPCR	protein_coding
ENSG00000135749.19	38.8152	5.19361	0.924088	5.62026	1.90675e-08	2.182e-07	PCNX2	protein_coding
ENSG00000236358.1	21.0866	2.0361	0.76772	2.65214	0.00799828	0.0263613	AL355472.2	antisense
ENSG00000273367.1	13.8032	2.73118	0.995636	2.74315	0.00608523	0.0209507	AL355472.3	antisense
ENSG00000168264.10	11002.5	-1.15353	0.175035	-6.59025	4.39075e-11	7.17234e-10	IRF2BP2	protein_coding
ENSG00000230628.1	14.5527	3.3728	1.11141	3.03472	0.00240762	0.0094457	AL160408.3	lincRNA
ENSG00000258082.1	21.6576	3.46665	0.905418	3.82878	0.000128779	0.000719617	AL391832.3	lincRNA
ENSG00000280587.1	441.836	1.14662	0.243839	4.70235	2.57185e-06	2.0436e-05	LINC01348	lincRNA
ENSG00000168243.11	452.792	-2.37956	0.252695	-9.41672	4.65385e-21	1.97513e-19	GNG4	protein_coding
ENSG00000116962.15	9560.08	-1.89366	0.181126	-10.4549	1.39099e-25	8.16818e-24	NID1	protein_coding
ENSG00000086619.13	351.88	1.10773	0.268897	4.11952	3.79658e-05	0.000238079	ERO1B	protein_coding
ENSG00000186197.14	55.2176	-1.61068	0.491515	-3.27696	0.0010493	0.0046002	EDARADD	protein_coding
ENSG00000198626.16	29.3663	4.77767	0.932614	5.12288	3.00907e-07	2.81552e-06	RYR2	protein_coding
ENSG00000117009.12	3.78062	5.31545	2.18654	2.43099	0.0150578	0.044683	KMO	protein_coding
ENSG00000054277.14	155.645	-1.26034	0.322657	-3.90613	9.37862e-05	0.000540252	OPN3	protein_coding
ENSG00000203668.2	1764.69	-1.48499	0.191898	-7.73846	1.00629e-14	2.42425e-13	CHML	protein_coding
ENSG00000174371.17	574.963	-1.1983	0.217779	-5.50238	3.74697e-08	4.08866e-07	EXO1	protein_coding
ENSG00000180287.16	68.5104	8.04568	1.4996	5.36521	8.08571e-08	8.32935e-07	PLD5	protein_coding
ENSG00000213690.3	8.14706	6.42125	1.82885	3.51109	0.000446271	0.00216709	AL360271.1	processed_pseudogene
ENSG00000253326.2	12.4137	5.55671	1.69714	3.27416	0.00105977	0.00463641	AL606534.4	processed_pseudogene
ENSG00000214837.8	42.7606	2.17155	0.57182	3.79761	0.000146097	0.000804995	LINC01347	transcribed_unprocessed_pseudogene
ENSG00000227230.1	7.18984	6.23706	1.91641	3.25455	0.00113571	0.00493222	AL606534.1	antisense
ENSG00000054282.16	559.804	1.24729	0.226602	5.5043	3.70641e-08	4.05051e-07	SDCCAG8	protein_coding
ENSG00000179456.10	240.157	-1.02403	0.274586	-3.72937	0.00019196	0.00102677	ZBTB18	protein_coding
ENSG00000179397.18	60.5536	1.14919	0.472552	2.43189	0.0150203	0.0446057	CATSPERE	protein_coding
ENSG00000162849.16	110.711	3.16752	0.40477	7.82548	5.05713e-15	1.25265e-13	KIF26B	protein_coding
ENSG00000162714.12	1794.5	-1.70328	0.197362	-8.63025	6.12204e-18	1.96707e-16	ZNF496	protein_coding
ENSG00000184731.6	225.21	1.48718	0.298733	4.97829	6.4148e-07	5.67665e-06	FAM110C	protein_coding
ENSG00000172554.12	5.06699	5.74128	2.04285	2.81043	0.00494756	0.0175647	SNTG2	protein_coding
ENSG00000130508.11	518.459	8.38287	0.63272	13.2489	4.57644e-40	6.36195e-38	PXDN	protein_coding
ENSG00000186487.19	11.4506	6.91291	1.72661	4.00374	6.23477e-05	0.000373966	MYT1L	protein_coding
ENSG00000151360.10	41.8985	1.42701	0.540448	2.64042	0.00828022	0.0271494	ALLC	protein_coding
ENSG00000236790.5	17.9553	2.41187	0.854757	2.8217	0.004777	0.0170768	LINC00299	lincRNA
ENSG00000236008.2	101.642	2.39653	0.402354	5.95627	2.58053e-09	3.31035e-08	LINC01814	lincRNA
ENSG00000231083.1	91.883	1.16375	0.385171	3.02139	0.00251619	0.00981792	AC011747.1	lincRNA
ENSG00000115738.10	11433.8	1.4637	0.16847	8.68817	3.68309e-18	1.20617e-16	ID2	protein_coding
ENSG00000143797.12	26.1344	2.88485	0.772975	3.73214	0.000189863	0.00101674	MBOAT2	protein_coding
ENSG00000172059.11	820.619	1.33848	0.204237	6.55358	5.61746e-11	9.07284e-10	KLF11	protein_coding
ENSG00000205795.4	11.6378	6.93952	1.73021	4.0108	6.05134e-05	0.000363871	CYS1	protein_coding
ENSG00000143882.12	40.0038	3.32284	0.680475	4.88312	1.04423e-06	8.92475e-06	ATP6V1C2	protein_coding
ENSG00000145063.14	4.95527	5.70597	2.03541	2.80335	0.00505741	0.0179007	AC062028.1	lincRNA
ENSG00000150873.11	20.461	4.23117	1.01467	4.16998	3.04621e-05	0.000195203	C2orf50	protein_coding
ENSG00000162976.13	113.653	1.32805	0.377073	3.52199	0.000428323	0.00208925	PQLC3	protein_coding
ENSG00000230952.1	1297.32	2.36807	0.204439	11.5833	5.00829e-31	4.26441e-29	AC099344.1	lincRNA
ENSG00000196208.14	6402.02	-2.46871	0.186409	-13.2435	4.92243e-40	6.8082e-38	GREB1	protein_coding
ENSG00000239899.3	60.0635	-2.85391	0.509905	-5.59696	2.18147e-08	2.48178e-07	RN7SL674P	misc_RNA
ENSG00000134324.11	695.344	-1.04095	0.215205	-4.83702	1.318e-06	1.10701e-05	LPIN1	protein_coding
ENSG00000265172.1	17.2151	7.50268	1.63944	4.57636	4.73133e-06	3.58794e-05	MIR4262	miRNA
ENSG00000224184.5	10.2426	5.26675	1.75335	3.00382	0.00266617	0.0103262	MIR3681HG	lincRNA
ENSG00000162981.14	177.922	7.09499	0.714713	9.92705	3.17507e-23	1.55595e-21	FAM84A	protein_coding
ENSG00000134323.12	65.9781	-2.25432	0.461532	-4.88442	1.03732e-06	8.8685e-06	MYCN	protein_coding
ENSG00000197872.11	56.613	6.17067	0.973604	6.33797	2.32816e-10	3.41608e-09	FAM49A	protein_coding
ENSG00000236204.6	78.466	1.345	0.413702	3.25112	0.0011495	0.00498572	LINC01376	lincRNA
ENSG00000227210.1	23.5321	1.73823	0.722626	2.40543	0.0161533	0.0473563	AC079145.1	antisense
ENSG00000132031.13	2746.43	1.19857	0.179075	6.69309	2.18512e-11	3.70954e-10	MATN3	protein_coding
ENSG00000115884.11	12236	1.17361	0.204238	5.74632	9.12059e-09	1.08804e-07	SDC1	protein_coding
ENSG00000269976.1	298.775	1.24937	0.255109	4.89739	9.71194e-07	8.35558e-06	AC012065.3	lincRNA
ENSG00000218819.4	86.3477	1.97438	0.416797	4.73703	2.16878e-06	1.75188e-05	TDRD15	protein_coding
ENSG00000228999.3	4.84655	5.67687	2.06252	2.75239	0.00591617	0.0204488	AC096570.1	lincRNA
ENSG00000119771.15	23.8416	2.89764	0.814072	3.55944	0.000371644	0.00184616	KLHL29	protein_coding
ENSG00000115129.14	15154.6	5.26349	0.196997	26.7186	2.86423e-157	1.95104e-153	TP53I3	protein_coding
ENSG00000176732.6	14.3645	2.369	0.950221	2.49311	0.012663	0.0387674	PFN4	protein_coding
ENSG00000184924.5	740.295	-1.26914	0.26319	-4.82216	1.4201e-06	1.18437e-05	PTRHD1	protein_coding
ENSG00000138092.11	2107.07	-1.05925	0.207028	-5.11647	3.11301e-07	2.9048e-06	CENPO	protein_coding
ENSG00000138031.14	45.5988	1.95857	0.553446	3.53887	0.000401847	0.00197816	ADCY3	protein_coding
ENSG00000084710.14	228.302	2.19699	0.305551	7.19027	6.46615e-13	1.31186e-11	EFR3B	protein_coding
ENSG00000157833.13	350.191	2.49265	0.276155	9.02626	1.77637e-19	6.47937e-18	GAREM2	protein_coding
ENSG00000115155.17	182.204	5.85442	0.506004	11.5699	5.85464e-31	4.90835e-29	OTOF	protein_coding
ENSG00000171303.7	6.89409	4.6828	1.88971	2.47805	0.0132104	0.0401542	KCNK3	protein_coding
ENSG00000157851.17	48.248	2.38435	0.538937	4.42417	9.68127e-06	6.90357e-05	DPYSL5	protein_coding
ENSG00000084764.11	180.295	2.81446	0.321836	8.74502	2.22975e-18	7.48202e-17	MAPRE3	protein_coding
ENSG00000231636.1	9.72049	5.19555	1.76503	2.94361	0.0032441	0.0122596	AGBL5-AS1	antisense
ENSG00000143994.14	24.8552	3.27909	0.793323	4.13336	3.57505e-05	0.000225294	ABHD1	protein_coding
ENSG00000084774.14	4383.95	-1.19004	0.197797	-6.01647	1.78265e-09	2.33183e-08	CAD	protein_coding
ENSG00000163794.6	36.6164	1.45948	0.603174	2.41967	0.0155346	0.045918	UCN	protein_coding
ENSG00000115216.14	3676.55	-1.15844	0.207597	-5.58026	2.4016e-08	2.71183e-07	NRBP1	protein_coding
ENSG00000138002.15	604.249	-2.26491	0.241051	-9.39598	5.66894e-21	2.39847e-19	IFT172	protein_coding
ENSG00000084734.9	347.1	-2.55199	0.254317	-10.0347	1.07285e-23	5.42336e-22	GCKR	protein_coding
ENSG00000221843.4	70.6216	2.19215	0.528626	4.14688	3.37037e-05	0.000213763	C2orf16	protein_coding
ENSG00000205334.2	67.3508	6.42687	0.931035	6.90293	5.09415e-12	9.24719e-11	LINC01460	lincRNA
ENSG00000243147.8	1809.16	1.03552	0.187605	5.51969	3.39604e-08	3.74169e-07	MRPL33	protein_coding
ENSG00000171174.15	207.102	3.23235	0.328015	9.85427	6.56899e-23	3.14561e-21	RBKS	protein_coding
ENSG00000265321.1	15.5088	2.31874	0.910936	2.54545	0.0109138	0.0342453	MIR4263	miRNA
ENSG00000225991.1	40.2507	1.53827	0.556871	2.76234	0.00573881	0.0199791	RPL23AP34	processed_pseudogene
ENSG00000229951.5	5.10022	5.74381	2.03182	2.82693	0.00469971	0.0168402	AC104695.2	antisense
ENSG00000075426.12	2307.02	1.53671	0.214966	7.14863	8.76509e-13	1.74961e-11	FOSL2	protein_coding
ENSG00000270640.1	32.1753	1.92453	0.625564	3.07647	0.00209468	0.00839196	AC104695.4	sense_intronic
ENSG00000163803.13	221.498	2.99324	0.326381	9.17098	4.6872e-20	1.81667e-18	PLB1	protein_coding
ENSG00000179270.7	4.21848	5.46751	2.16514	2.52525	0.0115617	0.0358998	PCARE	protein_coding
ENSG00000171094.18	11.6798	4.42318	1.39519	3.17031	0.00152277	0.00636462	ALK	protein_coding
ENSG00000119801.13	1484.4	2.15139	0.190399	11.2994	1.32177e-29	1.00598e-27	YPEL5	protein_coding
ENSG00000213626.13	32.7149	4.60466	0.856763	5.37449	7.67998e-08	7.95652e-07	LBH	protein_coding
ENSG00000158125.10	14.5035	4.76223	1.31649	3.61736	0.000297622	0.00151208	XDH	protein_coding
ENSG00000091106.19	7.55823	6.31088	1.86957	3.37558	0.000736613	0.00338286	NLRC4	protein_coding
ENSG00000018699.13	1198.87	-1.03954	0.196166	-5.29929	1.16251e-07	1.16796e-06	TTC27	protein_coding
ENSG00000049323.16	47.0343	2.17432	0.535621	4.05945	4.91895e-05	0.000302202	LTBP1	protein_coding
ENSG00000152689.18	8.3677	3.29758	1.34545	2.45092	0.0142493	0.0427283	RASGRP3	protein_coding
ENSG00000119812.19	1138.14	-1.00563	0.192759	-5.21702	1.81826e-07	1.77189e-06	FAM98A	protein_coding
ENSG00000260025.1	37.37	2.00198	0.594702	3.36635	0.00076169	0.00348393	CRIM1-DT	lincRNA
ENSG00000218739.10	2222.38	1.57177	0.211703	7.42445	1.13254e-13	2.51699e-12	CEBPZOS	protein_coding
ENSG00000272054.1	75.4366	1.53339	0.463017	3.31173	0.000927195	0.00413069	AC007390.2	sense_intronic
ENSG00000115828.17	66.3166	3.64048	0.55146	6.60154	4.06905e-11	6.69906e-10	QPCT	protein_coding
ENSG00000236213.1	11.5202	5.44804	1.71242	3.18148	0.00146523	0.00616096	AC006369.1	antisense
ENSG00000163171.7	69.503	5.45158	0.72227	7.54785	4.42492e-14	1.01829e-12	CDC42EP3	protein_coding
ENSG00000115841.20	355.784	1.49816	0.258032	5.80613	6.39345e-09	7.79778e-08	RMDN2	protein_coding
ENSG00000143891.17	1443.84	-1.28157	0.219218	-5.84611	5.03195e-09	6.24342e-08	GALM	protein_coding
ENSG00000214694.11	17.3182	3.98277	1.0519	3.78625	0.000152939	0.000839637	ARHGEF33	protein_coding
ENSG00000231312.6	748.88	1.09009	0.222498	4.89933	9.61648e-07	8.28915e-06	MAP4K3-DT	antisense
ENSG00000227028.6	21.3188	7.80782	1.61492	4.83479	1.33287e-06	1.11916e-05	SLC8A1-AS1	antisense
ENSG00000183023.18	25.6375	5.00841	1.08604	4.61161	3.99565e-06	3.07628e-05	SLC8A1	protein_coding
ENSG00000162878.13	1699.12	-1.87763	0.219857	-8.54023	1.33955e-17	4.20491e-16	PKDCC	protein_coding
ENSG00000143924.19	22426.4	-1.65181	0.189258	-8.72785	2.59566e-18	8.63539e-17	EML4	protein_coding
ENSG00000162882.15	924.226	1.04279	0.236281	4.41335	1.01783e-05	7.21836e-05	HAAO	protein_coding
ENSG00000231826.5	14.3108	2.79818	0.992843	2.81835	0.0048271	0.0172129	LINC01819	lincRNA
ENSG00000231336.1	6.6795	6.1353	1.90077	3.22779	0.00124751	0.00535206	AC017006.1	antisense
ENSG00000228100.1	540.933	5.80024	0.327055	17.7348	2.26094e-70	1.02673e-67	LINC01820	lincRNA
ENSG00000095002.14	2153.14	-1.23683	0.183699	-6.73289	1.6632e-11	2.85733e-10	MSH2	protein_coding
ENSG00000116062.15	2797.6	-2.0188	0.180211	-11.2024	3.96961e-29	2.88426e-27	MSH6	protein_coding
ENSG00000230773.8	34.6959	1.98962	0.608178	3.27144	0.00107	0.00467615	AC092650.1	lincRNA
ENSG00000282890.1	4.43891	5.54165	2.12434	2.60865	0.00909009	0.0293596	AC009975.1	lincRNA
ENSG00000179915.23	27.8475	6.73852	1.57196	4.28669	1.81354e-05	0.000121409	NRXN1	protein_coding
ENSG00000204993.3	32.3739	4.92259	0.91937	5.35431	8.58821e-08	8.7806e-07	AC139712.1	processed_pseudogene
ENSG00000233266.1	17.9801	2.13204	0.848255	2.51344	0.0119559	0.0368968	HMGB1P31	processed_pseudogene
ENSG00000178021.11	10.9402	6.85034	1.74606	3.92331	8.73417e-05	0.000507853	TSPYL6	protein_coding
ENSG00000285519.1	6.6825	6.14045	1.91907	3.19971	0.00137568	0.00583124	AC104781.2	antisense
ENSG00000240401.8	32.7793	3.01797	0.685829	4.40046	1.08019e-05	7.61273e-05	AC012358.3	antisense
ENSG00000119866.21	8.21958	3.89291	1.52991	2.54454	0.0109421	0.0343197	BCL11A	protein_coding
ENSG00000237522.1	81.8766	-1.12698	0.405319	-2.78048	0.00542791	0.0190487	NONOP2	processed_pseudogene
ENSG00000162927.14	995.298	-1.04584	0.198324	-5.27339	1.33928e-07	1.33229e-06	PUS10	protein_coding
ENSG00000212978.6	314.089	1.22086	0.256495	4.75979	1.93796e-06	1.57623e-05	AC016747.1	processed_transcript
ENSG00000237651.6	57.5096	1.34137	0.473917	2.83039	0.0046491	0.0166786	C2orf74	protein_coding
ENSG00000273302.1	11.0824	3.73637	1.25037	2.9882	0.00280625	0.0107997	AC016747.3	sense_intronic
ENSG00000270820.5	109.408	1.58667	0.365647	4.33936	1.429e-05	9.81367e-05	AC016727.1	antisense
ENSG00000229503.1	12.4018	7.02569	1.72047	4.08359	4.43447e-05	0.000274044	AC092155.2	processed_pseudogene
ENSG00000226622.5	7.19284	6.24146	1.87375	3.33101	0.000865329	0.00388838	AC092155.1	antisense
ENSG00000226605.1	3.78062	5.31545	2.18654	2.43099	0.0150578	0.044683	AC092567.1	antisense
ENSG00000115507.10	616.005	-1.19643	0.260208	-4.59797	4.26627e-06	3.26617e-05	OTX1	protein_coding
ENSG00000228305.2	477.687	-1.36645	0.268871	-5.08216	3.73161e-07	3.44311e-06	AC016734.1	processed_pseudogene
ENSG00000225889.7	29.2154	6.81164	1.55842	4.37086	1.23756e-05	8.60637e-05	AC012368.1	antisense
ENSG00000179833.4	7264.73	1.52688	0.181124	8.43004	3.45557e-17	1.04499e-15	SERTAD2	protein_coding
ENSG00000115902.11	3039.24	-1.03473	0.181667	-5.69572	1.2285e-08	1.4428e-07	SLC1A4	protein_coding
ENSG00000138069.18	5592.31	1.01836	0.205186	4.9631	6.93774e-07	6.10373e-06	RAB1A	protein_coding
ENSG00000232693.2	160.767	1.8115	0.357135	5.07232	3.92988e-07	3.61289e-06	AC012370.1	sense_intronic
ENSG00000204929.12	111.998	3.80705	0.438491	8.68217	3.88292e-18	1.27008e-16	AC007389.1	processed_transcript
ENSG00000281920.1	18.2055	7.58305	1.62924	4.65434	3.25015e-06	2.54182e-05	AC007389.5	lincRNA
ENSG00000280257.1	4.47816	5.56007	2.08879	2.66187	0.00777089	0.0257364	AC007741.1	TEC
ENSG00000236780.6	24.8469	2.44435	0.743248	3.28874	0.00100638	0.00444495	LINC01829	antisense
ENSG00000119865.8	3.85309	5.34033	2.17896	2.45086	0.0142516	0.0427283	CNRIP1	protein_coding
ENSG00000115956.10	12.6341	5.58281	1.69399	3.29566	0.000981896	0.00434949	PLEK	protein_coding
ENSG00000169621.10	265.022	2.09463	0.294154	7.12086	1.07255e-12	2.11613e-11	APLF	protein_coding
ENSG00000163219.11	6.60702	6.12101	1.90507	3.21301	0.00131352	0.00559646	ARHGAP25	protein_coding
ENSG00000169599.12	891.661	1.05525	0.198716	5.31035	1.09413e-07	1.10536e-06	NFU1	protein_coding
ENSG00000232228.1	21.2346	1.83332	0.761803	2.40655	0.016104	0.0472335	AC092431.2	processed_pseudogene
ENSG00000075340.23	13.172	5.64553	1.68133	3.35778	0.000785703	0.00357755	ADD2	protein_coding
ENSG00000124370.11	1096.67	-1.132	0.20541	-5.51092	3.56961e-08	3.90607e-07	MCEE	protein_coding
ENSG00000124374.9	23.6128	2.34043	0.771573	3.03332	0.00241878	0.00948266	PAIP2B	protein_coding
ENSG00000135636.14	75.3593	1.4541	0.420052	3.46171	0.000536759	0.00255059	DYSF	protein_coding
ENSG00000116096.6	653.117	-1.01141	0.220276	-4.59156	4.39941e-06	3.3596e-05	SPR	protein_coding
ENSG00000278060.1	17.1678	2.68591	0.916184	2.93163	0.00337189	0.0126618	AC012366.1	antisense
ENSG00000135632.12	1934.32	-1.51393	0.212143	-7.13637	9.58287e-13	1.90448e-11	SMYD5	protein_coding
ENSG00000135617.4	277.066	-1.03158	0.303607	-3.39774	0.000679448	0.00314953	PRADC1	protein_coding
ENSG00000144035.3	359.967	3.25841	0.277509	11.7416	7.79547e-32	6.80779e-30	NAT8	protein_coding
ENSG00000163016.10	227.992	4.25407	0.344408	12.3518	4.76049e-35	4.9697e-33	ALMS1P1	transcribed_unprocessed_pseudogene
ENSG00000273245.1	45.7155	1.42517	0.526764	2.70553	0.00681959	0.0230767	AC092653.1	lincRNA
ENSG00000187833.7	5.32065	5.80538	2.00761	2.89169	0.00383173	0.0141314	C2orf78	protein_coding
ENSG00000187605.15	2488.94	-1.18762	0.184612	-6.43308	1.25045e-10	1.92166e-09	TET3	protein_coding
ENSG00000225439.2	329.021	-1.34554	0.260269	-5.1698	2.34351e-07	2.23655e-06	BOLA3-AS1	antisense
ENSG00000005448.16	156.559	1.05487	0.324569	3.25006	0.00115381	0.00500206	WDR54	protein_coding
ENSG00000114993.16	3728.88	-1.34085	0.209586	-6.39763	1.57803e-10	2.39268e-09	RTKN	protein_coding
ENSG00000239779.7	166.679	1.08172	0.333322	3.24527	0.0011734	0.00507405	WBP1	protein_coding
ENSG00000115275.12	3611.92	-1.07366	0.205848	-5.21581	1.83011e-07	1.78153e-06	MOGS	protein_coding
ENSG00000272183.1	67.2256	1.08949	0.448075	2.4315	0.0150366	0.0446493	AC005041.3	antisense
ENSG00000144045.14	1772.43	1.44379	0.206454	6.99329	2.68516e-12	5.04917e-11	DQX1	protein_coding
ENSG00000159374.17	7.30761	3.71938	1.52144	2.44464	0.0144996	0.0433668	M1AP	protein_coding
ENSG00000159399.9	11702.5	-2.11747	0.187815	-11.2742	1.75925e-29	1.3205e-27	HK2	protein_coding
ENSG00000204792.2	16.2354	-2.7616	0.932125	-2.9627	0.00304954	0.0116243	LINC01291	lincRNA
ENSG00000230836.1	21.1408	-2.53787	0.794482	-3.19437	0.00140135	0.00592804	LINC01293	lincRNA
ENSG00000115350.11	967.206	-1.0552	0.199602	-5.28654	1.2465e-07	1.2459e-06	POLE4	protein_coding
ENSG00000115353.11	12.5527	7.04645	1.70343	4.13663	3.52438e-05	0.000222495	TACR1	protein_coding
ENSG00000270571.2	95.5824	-1.02224	0.418975	-2.43986	0.0146929	0.0437911	AC007681.1	antisense
ENSG00000176204.13	85.7762	-1.44636	0.406616	-3.55706	0.000375026	0.00186092	LRRTM4	protein_coding
ENSG00000066032.18	9.58448	3.04963	1.21924	2.50126	0.0123752	0.0379973	CTNNA2	protein_coding
ENSG00000115423.18	34.8595	4.42731	0.819539	5.40219	6.58309e-08	6.90151e-07	DNAH6	protein_coding
ENSG00000042445.14	7856.51	2.64936	0.209819	12.6269	1.5007e-36	1.73261e-34	RETSAT	protein_coding
ENSG00000152292.17	16.6468	3.90599	1.09492	3.56737	0.00036058	0.0017948	SH2D6	protein_coding
ENSG00000118640.11	1578.53	1.77832	0.209419	8.49168	2.03663e-17	6.30592e-16	VAMP8	protein_coding
ENSG00000168899.5	339.51	1.88493	0.28992	6.50155	7.94979e-11	1.25497e-09	VAMP5	protein_coding
ENSG00000115561.16	1808.96	1.22396	0.198085	6.17897	6.45192e-10	8.97374e-09	CHMP3	protein_coding
ENSG00000225933.1	31.3154	-1.90102	0.636846	-2.98506	0.00283525	0.0108944	AC133965.1	processed_pseudogene
ENSG00000172086.8	145.001	1.77821	0.341485	5.20729	1.91618e-07	1.85867e-06	KRCC1	protein_coding
ENSG00000115593.15	6.12991	6.01299	1.93647	3.10514	0.0019019	0.00771146	SMYD1	protein_coding
ENSG00000163586.9	1601.39	-4.39928	0.237779	-18.5016	2.00521e-76	1.21413e-73	FABP1	protein_coding
ENSG00000172073.4	343.041	7.04476	0.518393	13.5896	4.61481e-42	6.98554e-40	TEX37	protein_coding
ENSG00000225420.1	258.46	7.374	0.652886	11.2945	1.39745e-29	1.05768e-27	AC104134.1	antisense
ENSG00000153574.9	1123.05	-1.13188	0.2104	-5.37965	7.46317e-08	7.75253e-07	RPIA	protein_coding
ENSG00000230006.7	6.41982	6.07396	1.95213	3.11145	0.00186168	0.00757659	ANKRD36BP2	transcribed_unprocessed_pseudogene
ENSG00000283132.1	5.61657	5.8878	1.97842	2.97601	0.00292022	0.0111783	AC006453.1	unprocessed_pseudogene
ENSG00000230964.1	20.1111	6.26697	1.60426	3.90645	9.36633e-05	0.000540001	AC233266.1	processed_pseudogene
ENSG00000261600.1	60.0722	3.1145	0.534621	5.82562	5.69019e-09	6.98371e-08	AC233266.2	lincRNA
ENSG00000286156.1	584.91	1.52259	0.232236	6.55621	5.51914e-11	8.91933e-10	AC026273.1	transcribed_unprocessed_pseudogene
ENSG00000229089.8	21.7443	4.32294	0.996875	4.33649	1.44778e-05	9.92645e-05	ANKRD20A8P	transcribed_unprocessed_pseudogene
ENSG00000259848.9	16.4538	4.94156	1.29069	3.82862	0.000128863	0.000719831	AC097374.1	transcribed_unprocessed_pseudogene
ENSG00000155066.16	15.5213	5.88679	1.64776	3.5726	0.000353453	0.00176319	PROM2	protein_coding
ENSG00000174501.14	1253.35	-1.28011	0.214191	-5.97648	2.28006e-09	2.9429e-08	ANKRD36C	protein_coding
ENSG00000198885.9	541.304	-2.33057	0.263403	-8.84793	8.91555e-19	3.09061e-17	ITPRIPL1	protein_coding
ENSG00000196843.16	391.251	-1.01916	0.253173	-4.02556	5.68404e-05	0.000344163	ARID5A	protein_coding
ENSG00000168758.11	1985.56	-1.02825	0.238458	-4.3121	1.61712e-05	0.000109825	SEMA4C	protein_coding
ENSG00000168754.15	6.27487	6.04363	1.93208	3.12805	0.00175971	0.00722853	FAM178B	protein_coding
ENSG00000135976.19	2192.33	-1.14869	0.20255	-5.67113	1.41862e-08	1.65255e-07	ANKRD36	protein_coding
ENSG00000196912.12	725.86	-1.08592	0.257386	-4.21902	2.45364e-05	0.000160015	ANKRD36B	protein_coding
ENSG00000115085.13	449.151	4.5365	0.287988	15.7524	6.61109e-56	1.65259e-53	ZAP70	protein_coding
ENSG00000168658.18	13.655	4.66845	1.32402	3.52597	0.000421934	0.00206325	VWA3B	protein_coding
ENSG00000144191.11	5.72528	5.9129	1.96641	3.00695	0.00263885	0.0102321	CNGA3	protein_coding
ENSG00000071073.13	4882.95	-1.05906	0.186356	-5.683	1.32353e-08	1.54906e-07	MGAT4A	protein_coding
ENSG00000144218.18	56.0782	9.20498	1.513	6.08394	1.17262e-09	1.58092e-08	AFF3	protein_coding
ENSG00000170500.12	14.3644	3.34017	1.04943	3.18285	0.00145834	0.00614149	LONRF2	protein_coding
ENSG00000115526.11	482.928	-1.62547	0.229113	-7.09461	1.29716e-12	2.53543e-11	CHST10	protein_coding
ENSG00000163162.8	2999.45	-1.07006	0.187747	-5.6995	1.20161e-08	1.41183e-07	RNF149	protein_coding
ENSG00000175874.10	15.5422	2.15761	0.89699	2.40539	0.0161552	0.0473566	CREG2	protein_coding
ENSG00000196460.14	9.06808	4.0497	1.44067	2.81098	0.00493903	0.0175478	RFX8	protein_coding
ENSG00000286101.1	235.619	4.0805	0.353782	11.5339	8.89785e-31	7.39145e-29	AC093894.2	lincRNA
ENSG00000115594.12	1865.03	-1.80381	0.189074	-9.54025	1.42492e-21	6.26206e-20	IL1R1	protein_coding
ENSG00000115598.10	3.88933	5.35264	2.18051	2.45476	0.0140978	0.0424025	IL1RL2	protein_coding
ENSG00000115616.2	10.7011	3.21006	1.2538	2.56026	0.0104593	0.0330417	SLC9A2	protein_coding
ENSG00000228528.1	6.45906	6.08651	1.91521	3.17798	0.00148305	0.00622139	AC068057.1	lincRNA
ENSG00000071051.14	1093.81	-1.37971	0.217458	-6.34471	2.22849e-10	3.28215e-09	NCK2	protein_coding
ENSG00000153165.18	54.3979	1.39425	0.547126	2.54833	0.0108241	0.0340363	RGPD3	protein_coding
ENSG00000225328.1	13.1327	5.63922	1.69335	3.33021	0.000867819	0.00389841	LINC01594	antisense
ENSG00000236877.2	14.9833	4.7995	1.32018	3.63548	0.000277461	0.00142132	SETD6P1	processed_pseudogene
ENSG00000198075.10	342.938	2.81804	0.275346	10.2345	1.38859e-24	7.49205e-23	SULT1C4	protein_coding
ENSG00000135968.20	5694	1.66449	0.201981	8.24085	1.70997e-16	4.8736e-15	GCC2	protein_coding
ENSG00000214184.3	119.835	1.40876	0.347319	4.0561	4.98985e-05	0.000305799	GCC2-AS1	antisense
ENSG00000169756.16	2746.75	-1.07887	0.179369	-6.01481	1.80095e-09	2.3515e-08	LIMS1	protein_coding
ENSG00000163006.12	828.844	-1.20018	0.207507	-5.7838	7.30296e-09	8.8516e-08	CCDC138	protein_coding
ENSG00000135960.10	5.3599	5.82087	2.00308	2.90596	0.00366133	0.013608	EDAR	protein_coding
ENSG00000153093.18	13.214	7.12101	1.69219	4.20816	2.57458e-05	0.000167142	ACOXL	protein_coding
ENSG00000227992.1	101.17	-1.60254	0.377315	-4.24722	2.1644e-05	0.000142897	AC108463.1	processed_pseudogene
ENSG00000271590.1	114.624	-1.23029	0.394072	-3.12199	0.00179635	0.00735466	AC108463.3	lincRNA
ENSG00000270190.1	127.816	-1.08389	0.353014	-3.07039	0.0021378	0.00853959	AC068491.3	lincRNA
ENSG00000226928.1	80.6449	-1.04556	0.413568	-2.52815	0.0114665	0.0356437	RPS14P4	processed_pseudogene
ENSG00000153214.11	2071.34	1.18531	0.195804	6.05357	1.41669e-09	1.88741e-08	TMEM87B	protein_coding
ENSG00000188177.14	233.454	2.18843	0.290939	7.52197	5.39577e-14	1.22925e-12	ZC3H6	protein_coding
ENSG00000144130.11	221.679	3.84004	0.330952	11.603	3.97848e-31	3.39817e-29	NT5DC4	protein_coding
ENSG00000280228.1	111.831	2.63765	0.380556	6.93105	4.17729e-12	7.6594e-11	AC079753.1	TEC
ENSG00000180152.3	25.287	3.69855	0.849245	4.35511	1.33e-05	9.20017e-05	XIAPP3	processed_pseudogene
ENSG00000136689.18	1108.19	1.85624	0.205361	9.03892	1.58226e-19	5.79462e-18	IL1RN	protein_coding
ENSG00000272563.1	8.18329	6.42708	1.8298	3.51246	0.000443983	0.00215637	AC016745.2	lincRNA
ENSG00000144134.18	648.833	1.41513	0.218886	6.46514	1.01206e-10	1.57305e-09	RABL2A	protein_coding
ENSG00000243179.1	38.2171	1.74163	0.588692	2.95847	0.00309172	0.0117621	AC110769.1	lincRNA
ENSG00000019169.10	7.05094	3.66434	1.53767	2.38305	0.01717	0.0498754	MARCO	protein_coding
ENSG00000155368.16	3993.55	-1.5306	0.21462	-7.13166	9.91648e-13	1.96648e-11	DBI	protein_coding
ENSG00000171227.7	987.607	-1.16539	0.221697	-5.25666	1.46692e-07	1.44606e-06	TMEM37	protein_coding
ENSG00000163075.13	26.9502	5.6734	1.19745	4.73791	2.15939e-06	1.7459e-05	CFAP221	protein_coding
ENSG00000144120.13	881.936	-1.15563	0.223252	-5.17634	2.26286e-07	2.16565e-06	TMEM177	protein_coding
ENSG00000163083.6	347.946	-1.0979	0.254677	-4.31096	1.62548e-05	0.000110255	INHBB	protein_coding
ENSG00000115112.8	19.7788	7.70011	1.6223	4.74642	2.07052e-06	1.67853e-05	TFCP2L1	protein_coding
ENSG00000155052.14	4.22149	5.47558	2.12353	2.57853	0.00992226	0.0316053	CNTNAP5	protein_coding
ENSG00000136717.15	419.411	-1.03971	0.260541	-3.9906	6.59062e-05	0.000392598	BIN1	protein_coding
ENSG00000236682.1	134.962	-1.30546	0.330221	-3.9533	7.70811e-05	0.000453319	MAP3K2-DT	lincRNA
ENSG00000169994.18	71.8678	8.11493	1.4931	5.43494	5.48161e-08	5.82518e-07	MYO7B	protein_coding
ENSG00000180178.11	322.162	1.97004	0.275548	7.14954	8.70665e-13	1.73922e-11	FAR2P1	transcribed_unprocessed_pseudogene
ENSG00000286058.1	836.3	1.56149	0.21223	7.35751	1.87374e-13	4.06155e-12	AC018865.3	processed_transcript
ENSG00000196604.12	1631.14	1.4456	0.188717	7.66017	1.85692e-14	4.36921e-13	POTEF	protein_coding
ENSG00000223760.4	43.7115	2.4054	0.57899	4.15448	3.26035e-05	0.000207267	MED15P9	transcribed_unprocessed_pseudogene
ENSG00000152076.18	40.3771	2.6924	0.601696	4.47469	7.65232e-06	5.56304e-05	CCDC74B	protein_coding
ENSG00000136718.9	2289.13	-1.59928	0.195491	-8.18084	2.81864e-16	7.88496e-15	IMP4	protein_coding
ENSG00000072135.13	901.561	-1.52267	0.208051	-7.31874	2.50311e-13	5.34082e-12	PTPN18	protein_coding
ENSG00000178162.8	26.1111	3.03164	0.759833	3.98987	6.61084e-05	0.000393545	FAR2P2	transcribed_unprocessed_pseudogene
ENSG00000196834.12	90.0996	2.06872	0.412821	5.01117	5.40989e-07	4.85838e-06	POTEI	protein_coding
ENSG00000240253.6	8.34303	3.91199	1.49828	2.61098	0.00902826	0.0292257	FAR2P3	transcribed_unprocessed_pseudogene
ENSG00000136002.18	89.1738	4.79699	0.557403	8.60596	7.56779e-18	2.40606e-16	ARHGEF4	protein_coding
ENSG00000188219.14	324.083	1.67971	0.254532	6.59921	4.13351e-11	6.79286e-10	POTEE	protein_coding
ENSG00000231431.7	80.3759	1.9802	0.418011	4.73721	2.16682e-06	1.75087e-05	FAR2P4	transcribed_unprocessed_pseudogene
ENSG00000163040.14	67.9033	3.52733	0.520563	6.776	1.23546e-11	2.15509e-10	CCDC74A	protein_coding
ENSG00000286208.1	74.5345	6.15182	0.834579	7.37117	1.69132e-13	3.69029e-12	AC093838.2	lincRNA
ENSG00000204434.5	33.8111	5.41293	1.00227	5.40067	6.63928e-08	6.95504e-07	POTEKP	unprocessed_pseudogene
ENSG00000273588.1	8.32541	4.96483	1.81899	2.72944	0.00634424	0.0217026	AC093838.1	unprocessed_pseudogene
ENSG00000224559.2	31.0061	6.89561	1.55496	4.4346	9.22442e-06	6.61589e-05	LINC01087	lincRNA
ENSG00000183840.7	73.4134	1.37548	0.434024	3.16915	0.00152887	0.00638444	GPR39	protein_coding
ENSG00000176771.17	17.475	4.43635	1.13832	3.8973	9.72725e-05	0.000558563	NCKAP5	protein_coding
ENSG00000152127.9	6363.86	-1.39113	0.176232	-7.89378	2.93177e-15	7.5077e-14	MGAT5	protein_coding
ENSG00000152128.13	7.92967	3.84255	1.48862	2.58129	0.00984318	0.0313791	TMEM163	protein_coding
ENSG00000176601.12	9.25512	5.12014	1.76679	2.89799	0.00375568	0.013898	MAP3K19	protein_coding
ENSG00000115850.10	15.3041	2.68211	0.950656	2.82133	0.00478257	0.0170773	LCT	protein_coding
ENSG00000076003.5	1182.88	-2.81005	0.202526	-13.875	8.98035e-44	1.43092e-41	MCM6	protein_coding
ENSG00000231890.7	157.938	1.60868	0.333544	4.82298	1.41426e-06	1.18167e-05	DARS-AS1	antisense
ENSG00000144229.12	15.1195	7.31314	1.66629	4.38887	1.13944e-05	7.99336e-05	THSD7B	protein_coding
ENSG00000230569.1	4.14901	5.45285	2.14832	2.53819	0.0111426	0.0348648	AC114763.2	lincRNA
ENSG00000241772.2	68.7194	1.04025	0.432172	2.40702	0.0160833	0.0471815	AC092620.1	3prime_overlapping_ncRNA
ENSG00000168702.17	31.0291	2.31283	0.712432	3.24638	0.00116881	0.00505744	LRP1B	protein_coding
ENSG00000226674.10	14.428	3.69607	1.09013	3.39049	0.000697676	0.00322908	TEX41	lincRNA
ENSG00000281469.1	98.1786	1.23923	0.376896	3.288	0.00100901	0.00445509	AC019226.1	TEC
ENSG00000168280.17	79.8967	2.97611	0.466015	6.3863	1.69946e-10	2.55971e-09	KIF5C	protein_coding
ENSG00000115963.13	48.7621	2.84988	0.558389	5.10376	3.32977e-07	3.09365e-06	RND3	protein_coding
ENSG00000184898.7	36.1817	2.42034	0.635055	3.81122	0.00013828	0.000766577	RBM43	protein_coding
ENSG00000183091.19	220.88	4.93914	0.397419	12.428	1.84083e-35	1.98249e-33	NEB	protein_coding
ENSG00000286207.1	44.3005	2.17325	0.574183	3.78494	0.000153744	0.00084338	AC012443.2	antisense
ENSG00000177917.10	963.064	-1.39169	0.200747	-6.93257	4.13257e-12	7.5825e-11	ARL6IP6	protein_coding
ENSG00000227708.1	3.99805	5.38939	2.21332	2.43498	0.0148925	0.0442745	LINC01850	lincRNA
ENSG00000144278.15	122.424	-1.01506	0.342298	-2.96543	0.00302261	0.0115314	GALNT13	protein_coding
ENSG00000162989.5	5.02774	5.72499	2.02926	2.82123	0.00478406	0.0170773	KCNJ3	protein_coding
ENSG00000115159.16	8.55173	3.95621	1.47696	2.67862	0.00739254	0.0246572	GPD2	protein_coding
ENSG00000283436.1	7.00865	6.20301	1.8887	3.28427	0.00102248	0.00450562	LINC01958	lincRNA
ENSG00000007001.12	5.87024	5.94584	1.97464	3.01111	0.00260297	0.0101131	UPP2	protein_coding
ENSG00000144283.21	5453.85	-1.19368	0.171755	-6.9499	3.65546e-12	6.74342e-11	PKP4	protein_coding
ENSG00000204380.4	22.7466	3.31692	0.848907	3.90729	9.33368e-05	0.00053846	PKP4-AS1	antisense
ENSG00000228586.1	23.5594	7.95287	1.5948	4.98675	6.14045e-07	5.44803e-06	AC005042.2	lincRNA
ENSG00000231675.1	9.65085	6.66476	1.77933	3.74566	0.000179922	0.000969606	AC005042.3	processed_pseudogene
ENSG00000054219.11	4.69859	5.62983	2.06425	2.7273	0.00638558	0.0218112	LY75	protein_coding
ENSG00000153246.13	15.7446	4.87983	1.29917	3.7561	0.000172582	0.000933373	PLA2R1	protein_coding
ENSG00000144290.17	13.9448	7.19623	1.68401	4.27326	1.92634e-05	0.000128425	SLC4A10	protein_coding
ENSG00000184611.11	7.33779	6.26781	1.88453	3.32593	0.000881244	0.00394857	KCNH7	protein_coding
ENSG00000212312.1	18.9303	7.635	1.65315	4.61847	3.86586e-06	2.98478e-05	RNA5SP109	rRNA_pseudogene
ENSG00000182263.14	894.824	-2.29486	0.221081	-10.3802	3.05139e-25	1.72135e-23	FIGN	protein_coding
ENSG00000115290.9	204.069	-1.67558	0.312053	-5.36956	7.89302e-08	8.16171e-07	GRB14	protein_coding
ENSG00000236283.4	519.203	1.31426	0.239366	5.4906	4.00564e-08	4.36043e-07	AC019197.1	antisense
ENSG00000223318.1	10.9964	-2.76885	1.11832	-2.47591	0.0132897	0.040337	RNA5SP111	rRNA_pseudogene
ENSG00000169507.9	499.405	-2.40998	0.232847	-10.35	4.18289e-25	2.34509e-23	SLC38A11	protein_coding
ENSG00000153253.17	18.0908	7.57139	1.63678	4.6258	3.73162e-06	2.88605e-05	SCN3A	protein_coding
ENSG00000178662.16	8.0325	4.91226	1.82281	2.69488	0.00704138	0.0237358	CSRNP3	protein_coding
ENSG00000136546.15	22.6473	6.43503	1.59189	4.04239	5.29094e-05	0.000322078	SCN7A	protein_coding
ENSG00000073734.9	32.9957	6.9837	1.54975	4.50633	6.59593e-06	4.85728e-05	ABCB11	protein_coding
ENSG00000081479.14	89.7831	4.12149	0.532166	7.74474	9.57801e-15	2.32182e-13	LRP2	protein_coding
ENSG00000163093.12	101.11	-1.58717	0.373833	-4.24566	2.17954e-05	0.000143687	BBS5	protein_coding
ENSG00000071909.18	37.471	8.62326	1.54157	5.59382	2.22133e-08	2.5229e-07	MYO3B	protein_coding
ENSG00000204335.3	4287.18	-1.2019	0.181298	-6.62943	3.36986e-11	5.60212e-10	SP5	protein_coding
ENSG00000128683.14	185.332	5.4551	0.459265	11.8779	1.54207e-32	1.3959e-30	GAD1	protein_coding
ENSG00000235934.1	6.6825	6.14045	1.91907	3.19971	0.00137568	0.00583124	AC007405.2	antisense
ENSG00000123600.19	3884.84	1.24276	0.189114	6.57146	4.98227e-11	8.07566e-10	METTL8	protein_coding
ENSG00000224553.1	80.273	1.8162	0.434182	4.18303	2.87651e-05	0.000185418	AC008065.1	processed_pseudogene
ENSG00000115844.11	101.596	1.59397	0.373844	4.26372	2.01055e-05	0.000133548	DLX2	protein_coding
ENSG00000152256.13	2954.88	-1.45779	0.205065	-7.10891	1.16961e-12	2.29269e-11	PDK1	protein_coding
ENSG00000091436.17	1100.34	-1.43273	0.208657	-6.86643	6.58303e-12	1.17928e-10	MAP3K20	protein_coding
ENSG00000238133.6	6.34734	6.05881	1.93874	3.12513	0.00177727	0.00728309	MAP3K20-AS1	antisense
ENSG00000271151.1	39.5586	1.59758	0.603258	2.64826	0.00809078	0.026634	AC016737.1	lincRNA
ENSG00000260868.1	14.9051	4.80142	1.30255	3.68616	0.000227659	0.00119335	LINC01960	lincRNA
ENSG00000231453.1	6.38659	6.07173	1.91855	3.16475	0.00155218	0.00646869	LINC01305	lincRNA
ENSG00000144306.14	294.325	1.02729	0.278553	3.68795	0.000226068	0.00118524	SCRN3	protein_coding
ENSG00000163328.13	34.176	2.419	0.686369	3.52434	0.000424535	0.00207337	GPR155	protein_coding
ENSG00000115935.17	11.8974	3.83793	1.23443	3.10907	0.00187675	0.00762767	WIPF1	protein_coding
ENSG00000138435.15	5.90948	5.95981	1.95187	3.05338	0.0022628	0.00895619	CHRNA1	protein_coding
ENSG00000272729.1	13.3258	4.63287	1.32875	3.48664	0.000489122	0.00235129	AC009336.1	antisense
ENSG00000213963.6	197.772	1.46088	0.33349	4.38058	1.18361e-05	8.27876e-05	AC019080.1	sense_overlapping
ENSG00000196659.9	172.801	1.73025	0.319389	5.41738	6.04791e-08	6.37969e-07	TTC30B	protein_coding
ENSG00000197557.7	197.445	1.80627	0.313509	5.76144	8.3399e-09	1.00149e-07	TTC30A	protein_coding
ENSG00000079156.17	20.3795	3.59562	0.948966	3.78899	0.00015126	0.000831597	OSBPL6	protein_coding
ENSG00000079150.18	103.944	-1.47522	0.366489	-4.02528	5.6908e-05	0.000344495	FKBP7	protein_coding
ENSG00000155657.26	619.204	6.4566	0.361675	17.8519	2.79128e-71	1.35811e-68	TTN	protein_coding
ENSG00000163492.15	25.1086	4.54256	0.960644	4.72866	2.26007e-06	1.81867e-05	CCDC141	protein_coding
ENSG00000234663.6	165.677	5.03301	0.459595	10.951	6.57424e-28	4.3904e-26	LINC01934	lincRNA
ENSG00000115232.14	10.4933	6.7842	1.76732	3.83869	0.000123693	0.000693681	ITGA4	protein_coding
ENSG00000188452.14	4.29396	5.49786	2.11192	2.60325	0.00923453	0.0296959	CERKL	protein_coding
ENSG00000077232.18	5154.87	-1.20303	0.180278	-6.67319	2.50299e-11	4.22546e-10	DNAJC10	protein_coding
ENSG00000188738.15	41.571	4.45152	0.771718	5.76833	8.00616e-09	9.65238e-08	FSIP2	protein_coding
ENSG00000231646.5	32.6214	-2.35367	0.661116	-3.56015	0.000370649	0.00184155	FSIP2-AS1	antisense
ENSG00000224019.1	33.3301	-1.81015	0.656209	-2.7585	0.00580681	0.0201655	RPL21P32	processed_pseudogene
ENSG00000237877.6	127.326	-1.25308	0.340103	-3.68442	0.000229222	0.00120038	LINC01473	lincRNA
ENSG00000144369.13	29.2437	2.60932	0.705347	3.69934	0.000216162	0.00114078	FAM171B	protein_coding
ENSG00000224063.5	1605.9	-2.96436	0.198739	-14.9159	2.59889e-50	5.32421e-48	AC007319.1	antisense
ENSG00000064989.13	6.71862	4.63463	1.91667	2.41806	0.0156036	0.046067	CALCRL	protein_coding
ENSG00000204262.13	162.339	2.92527	0.34645	8.44355	3.07855e-17	9.37221e-16	COL5A2	protein_coding
ENSG00000138449.10	4711.26	3.10086	0.192287	16.1262	1.67065e-58	4.59801e-56	SLC40A1	protein_coding
ENSG00000187699.10	132.662	1.12922	0.355334	3.17792	0.00148334	0.00622139	C2orf88	protein_coding
ENSG00000138379.4	4.07353	5.42124	2.14345	2.52922	0.0114317	0.0355531	MSTN	protein_coding
ENSG00000151689.13	1509.33	1.87885	0.190757	9.84948	6.89009e-23	3.28782e-21	INPP1	protein_coding
ENSG00000151690.15	62.3163	1.12645	0.458911	2.45462	0.0141034	0.0424146	MFSD6	protein_coding
ENSG00000138386.17	1057.91	-1.20017	0.200454	-5.98727	2.13389e-09	2.76735e-08	NAB1	protein_coding
ENSG00000228509.5	4.03729	5.40954	2.14675	2.51987	0.0117398	0.0363452	AC006460.1	antisense
ENSG00000115415.18	9177.02	1.81115	0.174457	10.3817	3.00476e-25	1.7021e-23	STAT1	protein_coding
ENSG00000229023.1	50.3935	2.83767	0.556096	5.10283	3.34604e-07	3.10735e-06	AC067945.1	processed_pseudogene
ENSG00000138378.19	34.6915	3.35749	0.753309	4.45699	8.31168e-06	6.00871e-05	STAT4	protein_coding
ENSG00000128641.19	5154.21	-1.07854	0.176348	-6.11599	9.59584e-10	1.31096e-08	MYO1B	protein_coding
ENSG00000252130.1	30.9747	-1.77377	0.639814	-2.77232	0.00556582	0.019475	RNU6-1045P	snRNA
ENSG00000173559.12	3962.41	1.91284	0.215698	8.86812	7.43905e-19	2.59197e-17	NABP1	protein_coding
ENSG00000224099.1	3.81686	5.32794	2.18098	2.44291	0.0145693	0.043475	AC104823.1	lincRNA
ENSG00000196950.14	2505.6	1.50993	0.20463	7.3788	1.59721e-13	3.49987e-12	SLC39A10	protein_coding
ENSG00000118997.14	28.8384	4.41938	0.891237	4.9587	7.09649e-07	6.22732e-06	DNAH7	protein_coding
ENSG00000138411.13	32.1714	3.22616	0.708308	4.55475	5.2449e-06	3.94573e-05	HECW2	protein_coding
ENSG00000187944.2	4.36944	5.52781	2.12236	2.60456	0.00919927	0.029635	C2orf66	protein_coding
ENSG00000197121.15	3645.31	2.28985	0.202899	11.2856	1.54549e-29	1.16326e-27	PGAP1	protein_coding
ENSG00000065413.20	26.6992	2.05445	0.70188	2.92706	0.00342183	0.0128263	ANKRD44	protein_coding
ENSG00000115896.16	11.7742	3.84084	1.26733	3.03067	0.00244012	0.00955669	PLCL1	protein_coding
ENSG00000138356.14	1457.37	1.77225	0.193402	9.16353	5.02274e-20	1.93571e-18	AOX1	protein_coding
ENSG00000243478.9	9.46682	5.16007	1.7613	2.9297	0.00339289	0.0127319	AOX2P	transcribed_unprocessed_pseudogene
ENSG00000224672.4	18.199	2.96003	0.917379	3.22662	0.00125262	0.00537059	RPL17P10	processed_pseudogene
ENSG00000003400.14	1896.07	1.07935	0.182088	5.92764	3.0732e-09	3.91653e-08	CASP10	protein_coding
ENSG00000213090.2	94.1674	1.3489	0.421048	3.20366	0.00135693	0.00576433	AC007256.1	processed_pseudogene
ENSG00000155754.15	17.2425	6.03872	1.64035	3.68135	0.000232002	0.00121308	C2CD6	protein_coding
ENSG00000082126.18	13.2171	4.62182	1.33274	3.46789	0.000524556	0.00249958	MPP4	protein_coding
ENSG00000138395.15	13.6911	7.17213	1.68426	4.25833	2.05962e-05	0.000136575	CDK15	protein_coding
ENSG00000155760.2	108.802	-2.05957	0.388396	-5.30276	1.14065e-07	1.14853e-06	FZD7	protein_coding
ENSG00000182329.13	7.37704	6.27892	1.8621	3.37196	0.000746344	0.00342093	KIAA2012	protein_coding
ENSG00000138380.18	181.364	2.13461	0.339517	6.28719	3.23271e-10	4.67029e-09	CARF	protein_coding
ENSG00000173166.18	1469.85	-1.0722	0.191859	-5.58848	2.29065e-08	2.5973e-07	RAPH1	protein_coding
ENSG00000178562.18	4.77107	5.64987	2.05488	2.74949	0.00596882	0.0205942	CD28	protein_coding
ENSG00000118257.16	5536.49	1.80588	0.192847	9.36432	7.65415e-21	3.21841e-19	NRP2	protein_coding
ENSG00000204186.9	191.561	1.82954	0.319731	5.72214	1.05189e-08	1.2445e-07	ZDBF2	protein_coding
ENSG00000114948.13	168.126	7.0141	0.711993	9.85135	6.76275e-23	3.23271e-21	ADAM23	protein_coding
ENSG00000118263.15	372.398	-2.13185	0.246759	-8.63939	5.65162e-18	1.82452e-16	KLF7	protein_coding
ENSG00000223725.6	30.433	2.3803	0.675601	3.52324	0.000426308	0.00208128	AC009226.1	antisense
ENSG00000178385.15	1582.32	1.57053	0.187477	8.37716	5.42184e-17	1.60925e-15	PLEKHM3	protein_coding
ENSG00000225111.1	143.777	4.29636	0.44364	9.68434	3.51485e-22	1.60687e-20	AC083900.1	sense_intronic
ENSG00000138413.13	8404.22	-1.73582	0.179756	-9.6565	4.61375e-22	2.09169e-20	IDH1	protein_coding
ENSG00000078018.19	15.926	3.50169	1.03848	3.37194	0.000746409	0.00342093	MAP2	protein_coding
ENSG00000144406.18	31.2324	8.36064	1.55826	5.36536	8.07887e-08	8.32546e-07	UNC80	protein_coding
ENSG00000115361.8	5.10322	5.75067	2.03082	2.83169	0.0046302	0.0166239	ACADL	protein_coding
ENSG00000178568.15	34.9884	5.45836	1.01388	5.38365	7.29913e-08	7.59952e-07	ERBB4	protein_coding
ENSG00000197585.9	9.98288	5.22599	1.80294	2.8986	0.00374834	0.0138784	AC068051.1	antisense
ENSG00000174453.9	4.95527	5.70597	2.03541	2.80335	0.00505741	0.0179007	VWC2L	protein_coding
ENSG00000138376.11	869.234	-1.25381	0.20522	-6.10961	9.98775e-10	1.35661e-08	BARD1	protein_coding
ENSG00000144452.15	4957.52	10.7536	1.16719	9.21326	3.16378e-20	1.24933e-18	ABCA12	protein_coding
ENSG00000115425.14	1029.04	-1.27654	0.203174	-6.28302	3.32069e-10	4.78218e-09	PECR	protein_coding
ENSG00000115457.10	98.2061	2.30592	0.397429	5.80208	6.54958e-09	7.97543e-08	IGFBP2	protein_coding
ENSG00000231672.6	33.195	3.56319	0.732166	4.86664	1.13512e-06	9.62132e-06	DIRC3	lincRNA
ENSG00000231035.1	9.87146	5.22302	1.75204	2.98111	0.00287209	0.0110096	RPL7L1P9	processed_pseudogene
ENSG00000180871.8	103.641	10.0911	1.48653	6.78836	1.13417e-11	1.99115e-10	CXCR2	protein_coding
ENSG00000261338.2	64.6976	1.09176	0.442288	2.46844	0.0135705	0.0410657	AC021016.2	sense_overlapping
ENSG00000127838.14	1569.61	-1.06268	0.231097	-4.59841	4.25724e-06	3.26018e-05	PNKD	protein_coding
ENSG00000135926.15	8898.18	1.33976	0.1905	7.03286	2.02338e-12	3.86343e-11	TMBIM1	protein_coding
ENSG00000237281.1	15.9436	2.74036	0.954308	2.87156	0.00408446	0.0149122	CATIP-AS2	antisense
ENSG00000158428.4	223.55	6.43269	1.02677	6.26497	3.72906e-10	5.33643e-09	CATIP	protein_coding
ENSG00000018280.17	41.7919	2.25682	0.58516	3.85676	0.000114901	0.000649387	SLC11A1	protein_coding
ENSG00000144579.7	3754.99	-1.65066	0.200505	-8.2325	1.83344e-16	5.20914e-15	CTDSP1	protein_coding
ENSG00000127831.10	6782.12	-2.11219	0.197049	-10.7191	8.27965e-27	5.22212e-25	VIL1	protein_coding
ENSG00000144580.13	3228.84	-1.1128	0.178703	-6.22713	4.7507e-10	6.69991e-09	CNOT9	protein_coding
ENSG00000115556.14	5.69205	5.91039	2.00861	2.94252	0.00325548	0.0122924	PLCD4	protein_coding
ENSG00000074582.14	856.255	-1.13882	0.227394	-5.00812	5.49647e-07	4.92315e-06	BCS1L	protein_coding
ENSG00000135912.11	3885.97	-1.14814	0.199787	-5.74681	9.09428e-09	1.08538e-07	TTLL4	protein_coding
ENSG00000115592.11	4.55364	5.58854	2.11787	2.63876	0.00832104	0.0272602	PRKAG3	protein_coding
ENSG00000135925.9	10.4239	6.7783	1.75086	3.87141	0.000108207	0.000614618	WNT10A	protein_coding
ENSG00000163501.7	15.9907	-3.98264	1.07414	-3.70775	0.000209111	0.00111022	IHH	protein_coding
ENSG00000163521.16	220.964	1.1414	0.285565	3.99698	6.41561e-05	0.000383547	GLB1L	protein_coding
ENSG00000127824.14	358.433	-1.03754	0.26528	-3.9111	9.18759e-05	0.000530931	TUBA4A	protein_coding
ENSG00000243910.7	129.504	7.37863	0.897716	8.21934	2.04626e-16	5.78966e-15	TUBA4B	protein_coding
ENSG00000123992.19	1322.87	-1.94412	0.228985	-8.49015	2.0637e-17	6.38247e-16	DNPEP	protein_coding
ENSG00000175084.11	18.3086	5.11256	1.26898	4.02888	5.60428e-05	0.000339408	DES	protein_coding
ENSG00000072195.15	78.3932	4.26442	0.53814	7.92437	2.29303e-15	5.93898e-14	SPEG	protein_coding
ENSG00000072182.12	12.2777	3.44298	1.18501	2.90546	0.00366716	0.0136241	ASIC4	protein_coding
ENSG00000188760.10	392.5	-2.02444	0.272929	-7.41746	1.19392e-13	2.64477e-12	TMEM198	protein_coding
ENSG00000123999.5	59.5891	-3.70382	0.557604	-6.64239	3.08641e-11	5.15923e-10	INHA	protein_coding
ENSG00000144589.22	544.869	-1.04862	0.250738	-4.18211	2.88812e-05	0.000185946	STK11IP	protein_coding
ENSG00000231802.1	6.20239	6.02838	1.93133	3.12135	0.00180021	0.00736487	AC009502.2	processed_pseudogene
ENSG00000135903.19	21.2222	4.29073	0.997128	4.30309	1.68431e-05	0.000113792	PAX3	protein_coding
ENSG00000163082.10	7.08413	6.22151	1.87753	3.31366	0.000920824	0.00410566	SGPP2	protein_coding
ENSG00000152049.6	20.1502	7.72912	1.61271	4.79264	1.64603e-06	1.35537e-05	KCNE4	protein_coding
ENSG00000171951.5	11.8856	5.49268	1.71272	3.207	0.00134127	0.005704	SCG2	protein_coding
ENSG00000152056.17	466.752	1.17945	0.236616	4.98465	6.20727e-07	5.50373e-06	AP1S3	protein_coding
ENSG00000135919.13	5063.41	3.25187	0.197741	16.4451	9.09387e-61	2.78405e-58	SERPINE2	protein_coding
ENSG00000224826.1	8.22254	6.43718	1.82553	3.52619	0.000421577	0.00206188	AC019109.1	processed_pseudogene
ENSG00000124019.10	5.54109	5.86443	1.98574	2.95327	0.00314427	0.0119221	FAM124B	protein_coding
ENSG00000135905.19	56.5191	6.76017	1.11632	6.05578	1.39737e-09	1.86364e-08	DOCK10	protein_coding
ENSG00000235070.3	6.23863	6.03602	1.93093	3.12596	0.00177223	0.00727117	AC062015.1	lincRNA
ENSG00000144468.17	480.573	1.14311	0.237879	4.80544	1.54409e-06	1.28151e-05	RHBDD1	protein_coding
ENSG00000081052.12	19.5369	5.19755	1.25359	4.14614	3.3812e-05	0.0002144	COL4A4	protein_coding
ENSG00000169031.19	42.3567	7.34754	1.52544	4.81666	1.45979e-06	1.21598e-05	COL4A3	protein_coding
ENSG00000135917.15	332.572	-2.6663	0.260428	-10.2381	1.33781e-24	7.23239e-23	SLC19A3	protein_coding
ENSG00000123977.10	5.32065	5.80538	2.00761	2.89169	0.00383173	0.0141314	DAW1	protein_coding
ENSG00000153820.13	8.80836	6.53471	1.80119	3.62799	0.000285638	0.00145936	SPHKAP	protein_coding
ENSG00000187957.8	11.9639	6.97579	1.71663	4.06364	4.8313e-05	0.000297152	DNER	protein_coding
ENSG00000163053.11	4.03729	5.40954	2.14675	2.51987	0.0117398	0.0363452	SLC16A14	protein_coding
ENSG00000079263.19	20.6905	2.11031	0.812133	2.59847	0.00936395	0.0300624	SP140	protein_coding
ENSG00000235419.5	31.5038	5.90408	1.17513	5.02421	5.05509e-07	4.56382e-06	AC010149.1	antisense
ENSG00000204128.6	2310.26	-2.00386	0.195214	-10.2649	1.01408e-24	5.54832e-23	C2orf72	protein_coding
ENSG00000261829.1	15.4148	-3.59113	1.02819	-3.49269	0.000478182	0.00230439	AC009407.1	sense_overlapping
ENSG00000156966.7	106.23	2.7977	0.432245	6.47248	9.64046e-11	1.50443e-09	B3GNT7	protein_coding
ENSG00000207280.1	66.2932	-1.48244	0.473035	-3.1339	0.00172501	0.00711173	SNORD20	snoRNA
ENSG00000156973.14	332.12	1.05847	0.25173	4.2048	2.61318e-05	0.000169459	PDE6D	protein_coding
ENSG00000163273.4	30.8699	6.88756	1.55269	4.43589	9.16918e-06	6.5832e-05	NPPC	protein_coding
ENSG00000251485.1	13.2228	-3.74612	1.17782	-3.18056	0.00146993	0.00617311	AC068134.3	processed_pseudogene
ENSG00000163286.9	4.03729	5.40954	2.14675	2.51987	0.0117398	0.0363452	ALPG	protein_coding
ENSG00000237412.6	14.8776	3.73861	1.08997	3.43001	0.000603566	0.00282664	PRSS56	protein_coding
ENSG00000115474.6	4.91602	5.68932	2.06559	2.75433	0.00588117	0.0203536	KCNJ13	protein_coding
ENSG00000066248.15	386.027	-2.35532	0.262026	-8.98885	2.49828e-19	8.99216e-18	NGEF	protein_coding
ENSG00000222001.2	30.0942	-1.69733	0.635874	-2.66928	0.00760135	0.0252393	AC106876.1	processed_transcript
ENSG00000167165.19	19.2651	-2.02041	0.798659	-2.52975	0.0114143	0.0355393	UGT1A6	protein_coding
ENSG00000185038.14	7.9384	3.83368	1.51962	2.52279	0.0116427	0.0361143	MROH2A	protein_coding
ENSG00000144481.17	15.6867	4.25631	1.17714	3.61579	0.000299434	0.00152016	TRPM8	protein_coding
ENSG00000280744.1	170.059	5.23857	0.474496	11.0403	2.44268e-28	1.6807e-26	LINC01173	lincRNA
ENSG00000168505.7	13.1444	5.63824	1.6803	3.35549	0.000792246	0.00360192	GBX2	protein_coding
ENSG00000233611.3	8.92012	4.02289	1.44954	2.7753	0.0055151	0.0193273	AC019068.1	antisense
ENSG00000132321.17	6.78821	6.15652	1.90394	3.23357	0.00122254	0.00525982	IQCA1	protein_coding
ENSG00000124835.2	70.3227	2.37285	0.503004	4.71736	2.38928e-06	1.91079e-05	AC105760.1	antisense
ENSG00000227252.1	182.449	1.59506	0.311548	5.11979	3.05872e-07	2.85806e-06	AC105760.2	antisense
ENSG00000163359.15	26.6106	1.88717	0.691756	2.72809	0.0063703	0.0217754	COL6A3	protein_coding
ENSG00000132330.17	543.365	-1.41493	0.2302	-6.14652	7.92023e-10	1.09322e-08	SCLY	protein_coding
ENSG00000144488.15	437.635	5.01138	0.307354	16.3049	9.11042e-60	2.61296e-57	ESPNL	protein_coding
ENSG00000168427.9	237.34	6.36837	0.509863	12.4904	8.42641e-36	9.33311e-34	KLHL30	protein_coding
ENSG00000186235.10	20.6245	4.68103	1.08863	4.29994	1.70845e-05	0.000115223	LINC02610	processed_transcript
ENSG00000068024.16	2197.06	-1.1597	0.205442	-5.64493	1.65246e-08	1.9054e-07	HDAC4	protein_coding
ENSG00000182083.7	15.9257	7.38743	1.65988	4.45058	8.56377e-06	6.18275e-05	OR6B2	protein_coding
ENSG00000178602.8	26.9474	8.15089	1.5844	5.14447	2.6828e-07	2.52847e-06	OTOS	protein_coding
ENSG00000063660.9	4807.41	2.65242	0.213992	12.3949	2.7838e-35	2.93993e-33	GPC1	protein_coding
ENSG00000142327.13	1756.2	-1.50506	0.218957	-6.87379	6.25162e-12	1.12286e-10	RNPEPL1	protein_coding
ENSG00000178623.12	1765.53	1.06779	0.20178	5.29188	1.21068e-07	1.21412e-06	GPR35	protein_coding
ENSG00000130294.16	7.23797	4.75553	1.85271	2.5668	0.0102642	0.0325222	KIF1A	protein_coding
ENSG00000172482.5	249.705	-2.76491	0.291624	-9.48107	2.51693e-21	1.08855e-19	AGXT	protein_coding
ENSG00000233392.5	156.759	1.56749	0.334591	4.6848	2.80228e-06	2.21315e-05	AC104809.2	processed_transcript
ENSG00000162804.14	94.745	2.73192	0.417827	6.53841	6.21768e-11	1.00067e-09	SNED1	protein_coding
ENSG00000115687.13	1434.89	-1.80699	0.221231	-8.16789	3.13827e-16	8.73425e-15	PASK	protein_coding
ENSG00000146205.13	669.863	-1.37425	0.239747	-5.73211	9.91885e-09	1.17709e-07	ANO7	protein_coding
ENSG00000176720.6	1444.06	-1.10235	0.208998	-5.27446	1.33146e-07	1.32742e-06	BOK	protein_coding
ENSG00000176946.12	2314.27	-1.01978	0.212588	-4.79701	1.61051e-06	1.32974e-05	THAP4	protein_coding
ENSG00000168395.15	2577.68	-1.68643	0.194537	-8.66895	4.36134e-18	1.41806e-16	ING5	protein_coding
ENSG00000224272.2	70.2089	-3.19042	0.48548	-6.57167	4.97533e-11	8.06922e-10	AC131097.3	antisense
ENSG00000204099.11	1304.22	-2.08456	0.241596	-8.6283	6.22692e-18	1.99606e-16	NEU4	protein_coding
ENSG00000237940.3	26.5264	2.05695	0.711385	2.89147	0.00383443	0.0141391	LINC01238	lincRNA
ENSG00000134121.10	7.23497	4.75015	1.84815	2.57022	0.0101635	0.0322568	CHL1	protein_coding
ENSG00000231249.1	30.4799	1.69407	0.67299	2.51723	0.0118281	0.0365811	ITPR1-DT	antisense
ENSG00000150995.19	2474.86	-1.59331	0.178573	-8.92246	4.5605e-19	1.61167e-17	ITPR1	protein_coding
ENSG00000233912.1	29.164	2.70528	0.694575	3.89488	9.82489e-05	0.000563239	AC026202.2	antisense
ENSG00000215160.3	9.7569	4.17088	1.44282	2.89078	0.00384289	0.014163	OR7E122P	transcribed_unprocessed_pseudogene
ENSG00000196220.16	506.287	5.28333	0.314125	16.8192	1.76563e-63	5.79617e-61	SRGAP3	protein_coding
ENSG00000114026.21	813.003	-1.2338	0.206518	-5.97431	2.31067e-09	2.97959e-08	OGG1	protein_coding
ENSG00000214021.16	1462.96	1.54989	0.196427	7.89041	3.01194e-15	7.69132e-14	TTLL3	protein_coding
ENSG00000187288.10	29.2319	-2.93775	0.71284	-4.1212	3.76907e-05	0.000236529	CIDEC	protein_coding
ENSG00000163701.19	270.859	-1.18408	0.315013	-3.75884	0.000170706	0.000924514	IL17RE	protein_coding
ENSG00000163702.20	323.696	-1.08604	0.257276	-4.22128	2.42914e-05	0.000158569	IL17RC	protein_coding
ENSG00000230082.1	117.363	-2.44411	0.37483	-6.5206	7.00263e-11	1.11579e-09	PRRT3-AS1	antisense
ENSG00000269982.1	171.266	-1.87891	0.338609	-5.54891	2.87451e-08	3.20335e-07	AC018809.2	antisense
ENSG00000206567.9	30.2601	3.77347	0.78527	4.80531	1.54509e-06	1.28195e-05	AC022007.1	lincRNA
ENSG00000134070.5	734.979	-1.45971	0.24148	-6.04486	1.49543e-09	1.98452e-08	IRAK2	protein_coding
ENSG00000157014.11	677.384	-1.51555	0.233637	-6.48675	8.77061e-11	1.37578e-09	TATDN2	protein_coding
ENSG00000157020.18	4797.99	-1.36427	0.211458	-6.45174	1.10576e-10	1.70894e-09	SEC13	protein_coding
ENSG00000157087.19	630.162	4.55058	0.257474	17.6739	6.65885e-70	2.97432e-67	ATP2B2	protein_coding
ENSG00000157103.12	19.492	5.19984	1.24566	4.17435	2.98834e-05	0.000191765	SLC6A1	protein_coding
ENSG00000157152.17	7.26832	6.25949	1.87031	3.34676	0.000817617	0.0037006	SYN2	protein_coding
ENSG00000157150.5	19.5737	2.89663	0.863533	3.35439	0.000795397	0.00361263	TIMP4	protein_coding
ENSG00000132170.21	665.055	-1.93195	0.218821	-8.82894	1.05672e-18	3.64001e-17	PPARG	protein_coding
ENSG00000154743.17	485.733	-1.04042	0.231088	-4.50229	6.72254e-06	4.93584e-05	TSEN2	protein_coding
ENSG00000088726.16	484.843	8.87203	0.755695	11.7402	7.92698e-32	6.90053e-30	TMEM40	protein_coding
ENSG00000144712.12	7.74259	4.8628	1.82605	2.66302	0.00774424	0.02567	CAND2	protein_coding
ENSG00000163520.14	66.1879	5.15393	0.68571	7.51619	5.63946e-14	1.28262e-12	FBLN2	protein_coding
ENSG00000154767.14	3194.03	1.64456	0.182637	9.00456	2.16525e-19	7.85575e-18	XPC	protein_coding
ENSG00000144596.13	730.903	7.3718	0.415471	17.7432	1.94395e-70	8.97743e-68	GRIP2	protein_coding
ENSG00000207163.1	9.17375	6.59154	1.79505	3.67207	0.000240594	0.001252	RNU6-905P	snRNA
ENSG00000234123.1	107.016	5.862	0.64764	9.05133	1.41242e-19	5.19354e-18	RHBDF1P1	processed_pseudogene
ENSG00000154783.11	6.50119	4.5897	1.88577	2.43386	0.0149386	0.0443923	FGD5	protein_coding
ENSG00000230524.8	38.1392	2.76076	0.629996	4.38218	1.17496e-05	8.2235e-05	COL6A4P1	transcribed_unprocessed_pseudogene
ENSG00000131370.16	12.4923	2.56119	1.02405	2.50105	0.0123827	0.0380032	SH3BP5	protein_coding
ENSG00000169814.13	499.78	-1.32058	0.226946	-5.8189	5.92362e-09	7.24421e-08	BTD	protein_coding
ENSG00000131378.14	24.4003	2.19827	0.745961	2.94689	0.00320984	0.0121453	RFTN1	protein_coding
ENSG00000092345.13	5.13946	5.75996	2.02162	2.84918	0.00438321	0.0158424	DAZL	protein_coding
ENSG00000154822.18	225.457	8.76686	1.05629	8.29971	1.04367e-16	3.03812e-15	PLCL2	protein_coding
ENSG00000114166.8	341.888	2.47218	0.261342	9.45954	3.09293e-21	1.32923e-19	KAT2B	protein_coding
ENSG00000151789.12	19.9328	5.23322	1.24159	4.21494	2.49848e-05	0.000162551	ZNF385D	protein_coding
ENSG00000132967.9	834.234	-1.0719	0.236156	-4.53896	5.65326e-06	4.22707e-05	HMGB1P5	transcribed_processed_pseudogene
ENSG00000163508.12	30.7081	3.80382	0.80412	4.73041	2.24062e-06	1.80461e-05	EOMES	protein_coding
ENSG00000144642.21	28.3512	4.38356	0.893206	4.90766	9.21685e-07	7.9699e-06	RBMS3	protein_coding
ENSG00000144644.14	12.7457	4.55699	1.35906	3.35305	0.00079925	0.0036265	GADL1	protein_coding
ENSG00000144645.13	2693.32	-1.75059	0.179754	-9.73881	2.05943e-22	9.52689e-21	OSBPL10	protein_coding
ENSG00000170293.9	309.844	-1.92808	0.267364	-7.21143	5.53675e-13	1.13771e-11	CMTM8	protein_coding
ENSG00000153551.13	536.106	-1.3203	0.220687	-5.98269	2.19484e-09	2.83963e-08	CMTM7	protein_coding
ENSG00000206557.6	11743.5	-1.17394	0.16855	-6.96492	3.28601e-12	6.10736e-11	TRIM71	protein_coding
ENSG00000173705.9	4.84655	5.67687	2.06252	2.75239	0.00591617	0.0204488	SUSD5	protein_coding
ENSG00000153558.15	231.819	1.52192	0.275766	5.51887	3.41177e-08	3.7575e-07	FBXL2	protein_coding
ENSG00000231382.1	4.80731	5.65979	2.0539	2.75562	0.00585801	0.0202915	NBPF21P	unprocessed_pseudogene
ENSG00000168016.14	118.299	2.41686	0.395561	6.10997	9.96522e-10	1.35423e-08	TRANK1	protein_coding
ENSG00000076242.14	2486.3	1.32433	0.185323	7.14609	8.92843e-13	1.77961e-11	MLH1	protein_coding
ENSG00000270194.1	120.896	1.16904	0.345623	3.38242	0.000718496	0.00331362	AC097359.2	antisense
ENSG00000198590.11	122.583	-1.01464	0.361949	-2.80326	0.00505883	0.0179034	C3orf35	processed_transcript
ENSG00000144668.12	29.0172	3.53407	0.809179	4.36748	1.25688e-05	8.72958e-05	ITGA9	protein_coding
ENSG00000136059.14	40.9306	-3.40897	0.63462	-5.37167	7.80104e-08	8.07273e-07	VILL	protein_coding
ENSG00000187091.13	1075.29	2.20893	0.243789	9.06082	1.29472e-19	4.76719e-18	PLCD1	protein_coding
ENSG00000008226.19	15.1157	3.40883	1.09465	3.11407	0.00184523	0.00751974	DLEC1	protein_coding
ENSG00000060971.18	2549.76	-1.47	0.210355	-6.98818	2.78478e-12	5.22929e-11	ACAA1	protein_coding
ENSG00000172936.14	1059.05	-1.29256	0.238864	-5.41127	6.25782e-08	6.58837e-07	MYD88	protein_coding
ENSG00000093217.10	1749.7	-1.51268	0.18523	-8.1665	3.17466e-16	8.81753e-15	XYLB	protein_coding
ENSG00000114745.13	914.319	-1.04928	0.207518	-5.05635	4.27354e-07	3.90742e-06	GORASP1	protein_coding
ENSG00000168026.18	75.8809	1.1381	0.42175	2.69851	0.00696507	0.0235193	TTC21A	protein_coding
ENSG00000170011.14	10.3241	2.8035	1.14903	2.43988	0.014692	0.0437911	MYRIP	protein_coding
ENSG00000182606.15	7051.73	1.54617	0.172274	8.97506	2.83186e-19	1.01526e-17	TRAK1	protein_coding
ENSG00000222872.1	19.1603	2.37346	0.851011	2.78899	0.00528731	0.0185936	RNU4-78P	snRNA
ENSG00000157093.9	4.62311	5.60187	2.08403	2.688	0.0071881	0.0241319	LYZL4	protein_coding
ENSG00000114812.13	25.4711	4.99686	1.04656	4.77454	1.80119e-06	1.47202e-05	VIPR1	protein_coding
ENSG00000008324.11	264.268	-1.06394	0.262572	-4.05199	5.07835e-05	0.000310455	SS18L2	protein_coding
ENSG00000010282.14	8.56062	3.32626	1.33729	2.48731	0.0128713	0.0392932	HHATL	protein_coding
ENSG00000280571.2	25.0752	4.9691	1.04934	4.73544	2.18577e-06	1.76409e-05	AC006059.2	protein_coding
ENSG00000144648.16	227.619	2.07672	0.283223	7.33244	2.26e-13	4.84486e-12	ACKR2	protein_coding
ENSG00000180432.5	32.1541	-1.95568	0.626437	-3.1219	0.00179685	0.0073556	CYP8B1	protein_coding
ENSG00000011198.9	392.964	1.00617	0.259165	3.88236	0.000103449	0.000590671	ABHD5	protein_coding
ENSG00000173769.4	7.19	4.74918	1.84873	2.56888	0.0102026	0.0323584	TOPAZ1	protein_coding
ENSG00000163810.11	204.669	6.14963	0.518991	11.8492	2.17259e-32	1.94725e-30	TGM4	protein_coding
ENSG00000235845.1	13.6942	7.17457	1.69497	4.23286	2.30737e-05	0.000151492	AC098649.1	antisense
ENSG00000012223.12	8.3009	4.95819	1.79938	2.7555	0.00586025	0.0202967	LTF	protein_coding
ENSG00000178038.17	6.16615	6.02071	1.93317	3.11442	0.00184306	0.00751203	ALS2CL	protein_coding
ENSG00000160799.11	960.843	-1.14932	0.234808	-4.8947	9.84538e-07	8.46395e-06	CCDC12	protein_coding
ENSG00000047849.21	7976.22	-1.10102	0.172952	-6.36604	1.93969e-10	2.8925e-09	MAP4	protein_coding
ENSG00000164045.11	1018.02	-1.47325	0.200166	-7.36012	1.83744e-13	3.9888e-12	CDC25A	protein_coding
ENSG00000145040.4	154.527	5.49772	0.516538	10.6434	1.87176e-26	1.15384e-24	UCN2	protein_coding
ENSG00000114270.17	5738.32	4.18501	0.196215	21.3287	6.14386e-101	6.97507e-98	COL7A1	protein_coding
ENSG00000008300.17	1252.6	-1.70509	0.212939	-8.00742	1.17136e-15	3.11072e-14	CELSR3	protein_coding
ENSG00000178537.10	283.709	1.00344	0.283639	3.53774	0.000403566	0.00198483	SLC25A20	protein_coding
ENSG00000233276.5	8544.19	2.03984	0.224772	9.07516	1.13509e-19	4.22511e-18	GPX1	polymorphic_pseudogene
ENSG00000145022.4	561.664	1.43192	0.227874	6.28381	3.30368e-10	4.76272e-09	TCTA	protein_coding
ENSG00000185614.5	29.6713	3.74253	0.783328	4.77772	1.7729e-06	1.45107e-05	INKA1	protein_coding
ENSG00000182179.13	127.751	-1.22694	0.383576	-3.1987	0.0013805	0.00584984	UBA7	protein_coding
ENSG00000164077.14	284.038	-2.12002	0.287469	-7.3748	1.64597e-13	3.59934e-12	MON1A	protein_coding
ENSG00000001617.12	3885.03	2.05419	0.205514	9.99538	1.5967e-23	7.93894e-22	SEMA3F	protein_coding
ENSG00000188338.15	1106.82	-1.39558	0.233637	-5.97327	2.32546e-09	2.99724e-08	SLC38A3	protein_coding
ENSG00000114353.17	2273.33	-1.08617	0.230935	-4.70334	2.55945e-06	2.03435e-05	GNAI2	protein_coding
ENSG00000232352.1	83.8486	2.918	0.44347	6.57992	4.70714e-11	7.66162e-10	SEMA3B-AS1	antisense
ENSG00000214706.10	1712.03	-1.96909	0.239386	-8.22557	1.94264e-16	5.51366e-15	IFRD2	protein_coding
ENSG00000088538.13	42.1183	3.78926	0.662603	5.71875	1.07313e-08	1.26853e-07	DOCK3	protein_coding
ENSG00000145050.16	1660.01	-1.29011	0.196581	-6.56274	5.28267e-11	8.54732e-10	MANF	protein_coding
ENSG00000114767.7	873.144	-1.18422	0.230322	-5.14161	2.72394e-07	2.56458e-06	RRP9	protein_coding
ENSG00000041880.14	840.969	1.44256	0.212608	6.78507	1.16028e-11	2.03306e-10	PARP3	protein_coding
ENSG00000164086.10	860.228	-1.54796	0.22907	-6.75761	1.40286e-11	2.42229e-10	DUSP7	protein_coding
ENSG00000247596.9	1820.38	1.49374	0.236153	6.32532	2.52713e-10	3.69649e-09	TWF2	protein_coding
ENSG00000168237.18	1121.45	-2.29712	0.233933	-9.81955	9.2755e-23	4.36493e-21	GLYCTK	protein_coding
ENSG00000010318.21	346.595	1.06728	0.243715	4.37922	1.19103e-05	8.31887e-05	PHF7	protein_coding
ENSG00000010319.6	1155.52	-2.07984	0.201284	-10.3329	5.00419e-25	2.78833e-23	SEMA3G	protein_coding
ENSG00000114854.7	127.449	-2.03867	0.353441	-5.76807	8.01843e-09	9.6629e-08	TNNC1	protein_coding
ENSG00000010327.10	34.7252	1.51321	0.603749	2.50636	0.0121982	0.0375297	STAB1	protein_coding
ENSG00000168268.11	4791.23	-1.43732	0.211515	-6.79537	1.08033e-11	1.90522e-10	NT5DC2	protein_coding
ENSG00000163938.17	3268.6	-1.19602	0.191135	-6.25748	3.91251e-10	5.58429e-09	GNL3	protein_coding
ENSG00000212493.1	29.5359	-1.8079	0.651416	-2.77534	0.00551437	0.0193273	SNORD19	snoRNA
ENSG00000213533.12	49.1541	-1.43291	0.50104	-2.85988	0.004238	0.0153841	STIMATE	protein_coding
ENSG00000157388.17	50.1798	4.05208	0.659741	6.14192	8.15274e-10	1.12247e-08	CACNA1D	protein_coding
ENSG00000157445.15	6.75197	6.14946	1.90159	3.23385	0.00122134	0.00525548	CACNA2D3	protein_coding
ENSG00000187672.13	15.3912	2.90722	0.958495	3.03311	0.0024205	0.00948804	ERC2	protein_coding
ENSG00000163947.11	3489.35	1.06429	0.175264	6.07249	1.2594e-09	1.69288e-08	ARHGEF3	protein_coding
ENSG00000174844.14	58.638	2.61212	0.533122	4.89967	9.59981e-07	8.27741e-06	DNAH12	protein_coding
ENSG00000168301.13	265.817	-1.49797	0.273436	-5.4783	4.29434e-08	4.65425e-07	KCTD6	protein_coding
ENSG00000168306.13	593.425	-1.81029	0.231454	-7.82139	5.2242e-15	1.29051e-13	ACOX2	protein_coding
ENSG00000163689.20	7.3742	4.78806	1.83861	2.60417	0.00920972	0.0296546	C3orf67	protein_coding
ENSG00000163618.18	11.1909	6.8774	1.7464	3.93804	8.21504e-05	0.000480127	CADPS	protein_coding
ENSG00000244342.5	4.3302	5.50888	2.11045	2.61029	0.00904663	0.029247	LINC00698	lincRNA
ENSG00000163637.13	111.036	5.72148	0.612889	9.33526	1.00739e-20	4.19059e-19	PRICKLE2	protein_coding
ENSG00000144749.13	1474.84	-2.38457	0.199318	-11.9636	5.50958e-33	5.19444e-31	LRIG1	protein_coding
ENSG00000163377.16	66.0116	-1.65037	0.445743	-3.70251	0.000213478	0.00112944	FAM19A4	protein_coding
ENSG00000114541.15	103.678	-1.02846	0.369307	-2.78483	0.0053555	0.018814	FRMD4B	protein_coding
ENSG00000240405.6	9.17375	6.59154	1.79505	3.67207	0.000240594	0.001252	SAMMSON	lincRNA
ENSG00000163412.13	64.2958	3.77313	0.557142	6.7723	1.26747e-11	2.2067e-10	EIF4E3	protein_coding
ENSG00000172986.12	130.792	-1.21545	0.351787	-3.45508	0.000550137	0.00260779	GXYLT2	protein_coding
ENSG00000121440.15	10.817	3.70713	1.29556	2.86142	0.00421751	0.015324	PDZRN3	protein_coding
ENSG00000242741.1	31.4527	6.91346	1.55795	4.43754	9.09921e-06	6.53469e-05	LINC02005	lincRNA
ENSG00000185008.17	9.13467	5.10491	1.77412	2.87744	0.00400922	0.0146807	ROBO2	protein_coding
ENSG00000240241.5	65.1379	2.73091	0.498591	5.47725	4.31988e-08	4.67821e-07	AC108752.1	lincRNA
ENSG00000114480.13	2123.06	1.34626	0.198228	6.79145	1.11013e-11	1.95147e-10	GBE1	protein_coding
ENSG00000241319.1	23.2861	2.33073	0.831458	2.80318	0.00506011	0.0179055	SETP6	processed_pseudogene
ENSG00000175161.13	9.70187	4.14493	1.44416	2.87014	0.00410293	0.0149676	CADM2	protein_coding
ENSG00000206538.9	54.8196	5.37598	0.798291	6.73436	1.64653e-11	2.83227e-10	VGLL3	protein_coding
ENSG00000175105.7	1293.5	1.69016	0.207199	8.15714	3.43049e-16	9.49904e-15	ZNF654	protein_coding
ENSG00000169379.15	449.171	-1.36649	0.228617	-5.97721	2.26998e-09	2.93128e-08	ARL13B	protein_coding
ENSG00000178700.7	236.324	1.05167	0.279691	3.76011	0.000169838	0.00092106	DHFR2	protein_coding
ENSG00000080224.17	8.44302	3.93849	1.46851	2.68196	0.00731921	0.0244575	EPHA6	protein_coding
ENSG00000170854.18	1159.77	-1.34008	0.191818	-6.98622	2.82386e-12	5.29537e-11	RIOX2	protein_coding
ENSG00000144810.16	7.56712	4.82033	1.83006	2.63397	0.00843917	0.0275975	COL8A1	protein_coding
ENSG00000184220.12	484.009	-1.42191	0.235043	-6.04959	1.45219e-09	1.93202e-08	CMSS1	protein_coding
ENSG00000206535.8	185.959	-1.47241	0.298068	-4.93983	7.81907e-07	6.81747e-06	LNP1	protein_coding
ENSG00000144820.8	3.96181	5.37714	2.19655	2.448	0.0143653	0.0430029	ADGRG7	protein_coding
ENSG00000154175.17	38.2047	7.19644	1.54015	4.67256	2.97472e-06	2.34052e-05	ABI3BP	protein_coding
ENSG00000081148.12	14.2137	2.55558	0.961035	2.6592	0.00783265	0.0259126	IMPG2	protein_coding
ENSG00000175841.8	10.1675	2.78296	1.15848	2.40225	0.0162946	0.0476987	FAM172BP	processed_pseudogene
ENSG00000170044.8	4.54763	5.57449	2.184	2.55243	0.0106976	0.0337046	ZPLD1	protein_coding
ENSG00000243701.6	120.526	2.60353	0.368564	7.06398	1.61801e-12	3.1311e-11	DUBR	lincRNA
ENSG00000114455.13	4.29096	5.49068	2.21084	2.48353	0.0130088	0.0396434	HHLA2	protein_coding
ENSG00000144821.9	24.8928	2.69201	0.820308	3.28171	0.0010318	0.00453883	MYH15	protein_coding
ENSG00000198919.13	1325.12	2.03862	0.207489	9.8252	8.76992e-23	4.14132e-21	DZIP3	protein_coding
ENSG00000114487.9	6.53743	4.59723	1.88702	2.43624	0.0148407	0.044164	MORC1	protein_coding
ENSG00000206532.2	87.3239	1.47878	0.416044	3.55438	0.000378878	0.00187833	AC117402.1	lincRNA
ENSG00000153283.12	5.94572	5.96781	1.94907	3.06188	0.00219952	0.00873493	CD96	protein_coding
ENSG00000240891.7	1147.94	2.91922	0.203136	14.3708	7.89596e-47	1.38785e-44	PLCXD2	protein_coding
ENSG00000144824.20	1322.03	-1.11165	0.190819	-5.82567	5.68848e-09	6.98371e-08	PHLDB2	protein_coding
ENSG00000176040.13	22.6896	6.44031	1.58718	4.05771	4.95566e-05	0.000303977	TMPRSS7	protein_coding
ENSG00000114529.12	251.85	1.64929	0.273574	6.02869	1.65294e-09	2.17994e-08	C3orf52	protein_coding
ENSG00000261488.1	29.1935	1.75335	0.689226	2.54395	0.0109608	0.0343669	TBILA	antisense
ENSG00000163606.11	5.17269	5.76253	2.04378	2.81955	0.00480913	0.0171556	CD200R1	protein_coding
ENSG00000072858.10	20.265	5.25868	1.24077	4.23824	2.25281e-05	0.000148159	SIDT1	protein_coding
ENSG00000176542.10	1451.67	-1.1668	0.206495	-5.65051	1.59975e-08	1.84854e-07	USF3	protein_coding
ENSG00000178075.20	22.4604	3.7505	0.938483	3.99634	6.43281e-05	0.00038429	GRAMD1C	protein_coding
ENSG00000163617.11	63.765	1.72938	0.481462	3.59193	0.000328241	0.00165011	CCDC191	protein_coding
ENSG00000185565.12	13.0299	4.59709	1.34001	3.43064	0.00060217	0.00282058	LSAMP	protein_coding
ENSG00000243276.5	9.42458	5.14769	1.80588	2.85052	0.00436476	0.0157832	AC068633.1	lincRNA
ENSG00000031081.10	14.2772	4.12711	1.17271	3.51929	0.0004327	0.00210758	ARHGAP31	protein_coding
ENSG00000121594.12	4.25772	5.48677	2.11613	2.59283	0.00951897	0.0304703	CD80	protein_coding
ENSG00000121577.13	17.3015	2.49811	0.959543	2.60344	0.00922944	0.0296959	POPDC2	protein_coding
ENSG00000183833.16	4.58687	5.59151	2.08123	2.68663	0.00721766	0.0241953	MAATS1	protein_coding
ENSG00000163428.4	2692.89	-1.699	0.191965	-8.85058	8.70682e-19	3.0221e-17	LRRC58	protein_coding
ENSG00000282950.1	7.78455	4.85852	1.83039	2.65436	0.00794596	0.0262358	AC063952.4	lincRNA
ENSG00000113924.12	3311.44	-1.11301	0.176734	-6.29764	3.02215e-10	4.38236e-09	HGD	protein_coding
ENSG00000145087.12	17.3237	6.04131	1.64384	3.67511	0.000237747	0.00123955	STXBP5L	protein_coding
ENSG00000114013.16	3.85309	5.34033	2.17896	2.45086	0.0142516	0.0427283	CD86	protein_coding
ENSG00000036828.16	6.57078	6.11381	1.90917	3.20234	0.00136315	0.00578621	CASR	protein_coding
ENSG00000121552.4	6499.4	9.44737	0.326295	28.9535	2.53643e-184	6.911e-180	CSTA	protein_coding
ENSG00000114030.13	3164.01	1.05292	0.187729	5.60869	2.0386e-08	2.32604e-07	KPNA1	protein_coding
ENSG00000173200.13	8.878	5.0629	1.78156	2.84184	0.00448543	0.0161574	PARP15	protein_coding
ENSG00000173193.15	1493.95	1.19038	0.195287	6.09552	1.09081e-09	1.47691e-08	PARP14	protein_coding
ENSG00000273033.2	154.544	1.71512	0.337672	5.07926	3.78909e-07	3.49261e-06	LINC02035	lincRNA
ENSG00000082684.15	5.80077	5.93546	1.97045	3.01224	0.00259325	0.0100854	SEMA5B	protein_coding
ENSG00000121542.12	304.998	1.39251	0.271325	5.13227	2.86267e-07	2.68777e-06	SEC22A	protein_coding
ENSG00000273454.1	10.8954	3.26013	1.19383	2.73082	0.00631761	0.0216224	AC112503.2	lincRNA
ENSG00000206527.10	3070.91	-1.1025	0.193436	-5.69957	1.20109e-08	1.41182e-07	HACD2	protein_coding
ENSG00000065534.18	2045.45	-1.78737	0.184716	-9.67627	3.80348e-22	1.733e-20	MYLK	protein_coding
ENSG00000173702.7	45.8721	1.5158	0.521683	2.90559	0.00366566	0.0136216	MUC13	protein_coding
ENSG00000221955.10	34.3596	1.66525	0.608458	2.73684	0.00620316	0.0212998	SLC12A8	protein_coding
ENSG00000241288.7	77.5071	2.03284	0.425435	4.77826	1.76815e-06	1.44762e-05	LINC02614	processed_transcript
ENSG00000189366.9	7.29889	3.72863	1.55925	2.39129	0.0167891	0.0489306	ALG1L	protein_coding
ENSG00000163884.4	279.034	-2.06096	0.282027	-7.30766	2.71829e-13	5.77281e-12	KLF15	protein_coding
ENSG00000180767.9	904.951	-2.18139	0.21469	-10.1606	2.97121e-24	1.55686e-22	CHST13	protein_coding
ENSG00000159685.10	415.872	-1.56561	0.242339	-6.46039	1.04433e-10	1.62044e-09	CHCHD6	protein_coding
ENSG00000163870.15	496.216	-1.2434	0.260146	-4.77964	1.75612e-06	1.43868e-05	TPRA1	protein_coding
ENSG00000073111.14	4801.69	-2.24537	0.247233	-9.08199	1.06607e-19	3.99549e-18	MCM2	protein_coding
ENSG00000114631.11	883.225	-1.83135	0.223732	-8.18549	2.71209e-16	7.61033e-15	PODXL2	protein_coding
ENSG00000114626.18	130.531	1.73074	0.348603	4.9648	6.87731e-07	6.05643e-06	ABTB1	protein_coding
ENSG00000114656.11	43.4797	2.38643	0.570804	4.18082	2.90466e-05	0.000186835	KIAA1257	protein_coding
ENSG00000172780.16	224.956	1.14338	0.303462	3.76778	0.000164706	0.000896829	RAB43	protein_coding
ENSG00000184897.6	1314.2	-1.06057	0.199897	-5.30559	1.12312e-07	1.13171e-06	H1FX	protein_coding
ENSG00000172771.12	60.8203	-1.64145	0.478132	-3.43306	0.000596819	0.00280178	EFCAB12	protein_coding
ENSG00000004399.12	6143.81	-1.32956	0.198461	-6.69936	2.09336e-11	3.56042e-10	PLXND1	protein_coding
ENSG00000172765.17	2269.08	-1.51547	0.183616	-8.25343	1.53909e-16	4.41893e-15	TMCC1	protein_coding
ENSG00000251287.8	42.7043	3.4352	0.626953	5.47921	4.27237e-08	4.63228e-07	ALG1L2	protein_coding
ENSG00000248243.1	172.606	7.79262	0.884923	8.80599	1.29703e-18	4.42306e-17	LINC02014	lincRNA
ENSG00000253540.5	119.134	1.19629	0.353924	3.38006	0.000724703	0.00333885	FAM86HP	transcribed_unprocessed_pseudogene
ENSG00000228252.9	6.16615	6.02071	1.93317	3.11442	0.00184306	0.00751203	COL6A4P2	transcribed_unitary_pseudogene
ENSG00000172752.14	9.13751	6.58633	1.79353	3.67227	0.000240406	0.0012515	COL6A5	protein_coding
ENSG00000206384.10	18.7639	5.13615	1.26575	4.0578	4.95363e-05	0.000303936	COL6A6	protein_coding
ENSG00000114670.14	113.665	1.44823	0.360372	4.01871	5.85172e-05	0.000353373	NEK11	protein_coding
ENSG00000198585.11	639.055	-1.41565	0.219148	-6.4598	1.0484e-10	1.62397e-09	NUDT16	protein_coding
ENSG00000114686.9	3092.04	-1.20297	0.176849	-6.80221	1.03025e-11	1.82044e-10	MRPL3	protein_coding
ENSG00000196353.11	5.98196	5.97577	1.94781	3.06794	0.00215541	0.00859734	CPNE4	protein_coding
ENSG00000251614.1	3.70814	5.29009	2.20913	2.39465	0.0166363	0.0485684	HSPA8P19	processed_pseudogene
ENSG00000144868.13	5.03075	5.73178	2.05779	2.78541	0.00534604	0.0187832	TMEM108	protein_coding
ENSG00000091513.16	94120.7	-1.00121	0.224026	-4.46916	7.85282e-06	5.69664e-05	TF	protein_coding
ENSG00000244062.1	590.378	-3.39924	0.288477	-11.7834	4.75324e-32	4.19131e-30	AC080128.1	processed_pseudogene
ENSG00000144867.11	1400.57	-1.19128	0.193055	-6.17069	6.79924e-10	9.44234e-09	SRPRB	protein_coding
ENSG00000154917.11	26.7841	2.79845	0.735373	3.80548	0.00014153	0.000782362	RAB6B	protein_coding
ENSG00000073711.11	68.2291	2.17521	0.48251	4.50812	6.54058e-06	4.82303e-05	PPP2R3A	protein_coding
ENSG00000118007.13	1626.09	-1.13749	0.184583	-6.16245	7.16258e-10	9.9267e-09	STAG1	protein_coding
ENSG00000168917.9	800.781	1.60393	0.203546	7.87993	3.27567e-15	8.32577e-14	SLC35G2	protein_coding
ENSG00000066405.13	9.50289	6.64131	1.79369	3.70258	0.000213414	0.00112933	CLDN18	protein_coding
ENSG00000158220.14	362.293	-1.13993	0.241309	-4.72393	2.31332e-06	1.85713e-05	ESYT3	protein_coding
ENSG00000206262.9	7.56428	3.7724	1.50666	2.50381	0.0122863	0.0377584	FOXL2NB	protein_coding
ENSG00000114115.9	881.015	1.72226	0.212821	8.09253	5.84374e-16	1.59065e-14	RBP1	protein_coding
ENSG00000158258.16	22.569	7.89105	1.59982	4.93245	8.12035e-07	7.07338e-06	CLSTN2	protein_coding
ENSG00000279147.1	6.66227	-4.77255	1.86355	-2.56101	0.010437	0.032998	AC112504.1	TEC
ENSG00000114126.17	1352.91	-1.62348	0.195989	-8.28355	1.19553e-16	3.46171e-15	TFDP2	protein_coding
ENSG00000175066.16	653.995	-1.12496	0.219559	-5.12371	2.99576e-07	2.805e-06	GK5	protein_coding
ENSG00000120756.13	585.07	-1.13575	0.227066	-5.00184	5.67846e-07	5.06451e-06	PLS1	protein_coding
ENSG00000163710.9	17.0602	3.30677	1.04375	3.16816	0.00153408	0.00640208	PCOLCE2	protein_coding
ENSG00000188582.8	100.28	1.24924	0.377495	3.3093	0.000935285	0.00416128	PAQR9	protein_coding
ENSG00000181804.15	5.13646	5.75317	2.03663	2.82485	0.00473031	0.0169343	SLC9A9	protein_coding
ENSG00000240216.7	27.8868	6.74135	1.56612	4.30448	1.67377e-05	0.000113165	CPHL1P	transcribed_unitary_pseudogene
ENSG00000163762.7	5.02774	5.72499	2.02926	2.82123	0.00478406	0.0170773	TM4SF18	protein_coding
ENSG00000206199.10	72.0009	9.565	1.50273	6.3651	1.95165e-10	2.90424e-09	ANKUB1	protein_coding
ENSG00000244265.1	63.0988	1.55683	0.479861	3.24434	0.00117725	0.00508667	SIAH2-AS1	antisense
ENSG00000144893.12	100.695	1.06591	0.36963	2.88373	0.00392989	0.0144368	MED12L	protein_coding
ENSG00000138271.5	88.0658	6.8157	0.927669	7.34713	2.02514e-13	4.37235e-12	GPR87	protein_coding
ENSG00000152580.8	7.22624	4.75597	1.84929	2.57179	0.0101176	0.0321223	IGSF10	protein_coding
ENSG00000114771.14	27.7574	-1.81661	0.668001	-2.71948	0.00653849	0.0222582	AADAC	protein_coding
ENSG00000152601.17	3281.56	-1.1694	0.174914	-6.68556	2.30042e-11	3.89556e-10	MBNL1	protein_coding
ENSG00000196549.10	4.77107	5.64987	2.05488	2.74949	0.00596882	0.0205942	MME	protein_coding
ENSG00000114805.17	134.669	-1.10297	0.328201	-3.36067	0.000777541	0.0035442	PLCH1	protein_coding
ENSG00000169282.17	7.44951	6.29175	1.86195	3.37911	0.000727206	0.00334756	KCNAB1	protein_coding
ENSG00000197415.12	7.78167	6.35718	1.84332	3.44877	0.000563138	0.00266016	VEPH1	protein_coding
ENSG00000214216.10	4.18224	5.45598	2.15357	2.53346	0.0112943	0.035206	IQCJ	protein_coding
ENSG00000169064.12	23.6407	5.47701	1.23795	4.42426	9.67725e-06	6.90251e-05	ZBBX	protein_coding
ENSG00000163536.12	67.092	-1.37206	0.449621	-3.0516	0.00227622	0.00899887	SERPINI1	protein_coding
ENSG00000206120.11	20.5872	3.1518	0.907929	3.47142	0.000517714	0.00247323	EGFEM1P	transcribed_unitary_pseudogene
ENSG00000270096.1	8.19223	3.25397	1.35498	2.40148	0.0163288	0.0477835	AC078795.2	antisense
ENSG00000013297.11	96.737	-3.00399	0.413929	-7.25727	3.94995e-13	8.2534e-12	CLDN11	protein_coding
ENSG00000163584.18	646.052	-1.13099	0.210251	-5.37923	7.4807e-08	7.76779e-07	RPL22L1	protein_coding
ENSG00000199488.1	39.1186	-1.37127	0.56363	-2.43292	0.0149777	0.0444934	RNU1-70P	snRNA
ENSG00000163581.14	501.011	-1.07395	0.222497	-4.82682	1.38731e-06	1.16165e-05	SLC2A2	protein_coding
ENSG00000186329.9	15.027	2.6594	1.03487	2.5698	0.0101756	0.0322845	TMEM212	protein_coding
ENSG00000075420.13	17233.1	-1.07271	0.17166	-6.24906	4.12941e-10	5.86621e-09	FNDC3B	protein_coding
ENSG00000121858.11	98.5872	2.67163	0.444898	6.00505	1.91279e-09	2.48891e-08	TNFSF10	protein_coding
ENSG00000169760.17	9.54214	6.64987	1.77693	3.74235	0.00018231	0.000981374	NLGN1	protein_coding
ENSG00000177565.16	3830	-1.42575	0.18025	-7.90982	2.57757e-15	6.65066e-14	TBL1XR1	protein_coding
ENSG00000172667.11	9176.18	1.94849	0.178623	10.9084	1.05056e-27	6.98164e-26	ZMAT3	protein_coding
ENSG00000121864.10	679.012	-1.09357	0.214568	-5.09662	3.4577e-07	3.20557e-06	ZNF639	protein_coding
ENSG00000114450.10	32.174	1.54127	0.644134	2.39278	0.0167215	0.0487596	GNB4	protein_coding
ENSG00000136521.13	1756.46	1.34817	0.201233	6.69955	2.09062e-11	3.55798e-10	NDUFB5	protein_coding
ENSG00000114757.19	7.63371	6.32794	1.8501	3.42033	0.00062546	0.00291914	PEX5L	protein_coding
ENSG00000284862.2	16.5174	5.97192	1.6468	3.62638	0.000287423	0.00146601	CCDC39	protein_coding
ENSG00000242808.8	20.2323	2.20351	0.791535	2.78384	0.00537197	0.0188646	SOX2-OT	sense_overlapping
ENSG00000242512.8	7.12926	4.7347	1.87821	2.52086	0.0117067	0.03628	LINC01206	lincRNA
ENSG00000078081.8	171.327	7.3667	0.779614	9.44917	3.41535e-21	1.46317e-19	LAMP3	protein_coding
ENSG00000053524.12	12.2847	3.4604	1.19491	2.89596	0.00378002	0.0139767	MCF2L2	protein_coding
ENSG00000172578.12	6.35624	4.55914	1.89462	2.40636	0.0161125	0.0472417	KLHL6	protein_coding
ENSG00000114796.16	771.309	1.55469	0.209772	7.41135	1.2502e-13	2.76495e-12	KLHL24	protein_coding
ENSG00000145198.14	32.9471	1.89588	0.634582	2.9876	0.00281173	0.0108162	VWA5B2	protein_coding
ENSG00000214160.9	1386.98	-1.10355	0.229911	-4.79989	1.58749e-06	1.31392e-05	ALG3	protein_coding
ENSG00000284753.1	212.538	-1.14298	0.314048	-3.63952	0.000273145	0.00140117	EEF1AKMT4	protein_coding
ENSG00000114859.16	573.787	-1.84345	0.241925	-7.6199	2.53864e-14	5.91706e-13	CLCN2	protein_coding
ENSG00000182580.3	47.9196	3.22258	0.591832	5.44509	5.17791e-08	5.52399e-07	EPHB3	protein_coding
ENSG00000187068.3	337.572	-2.41427	0.264319	-9.13392	6.6063e-20	2.50003e-18	C3orf70	protein_coding
ENSG00000229638.1	190.564	-1.11725	0.317177	-3.52248	0.000427524	0.00208609	RPL4P4	processed_pseudogene
ENSG00000163900.11	1791.38	1.36661	0.196635	6.94995	3.65423e-12	6.74342e-11	TMEM41A	protein_coding
ENSG00000286086.1	32.5439	3.39155	0.727982	4.65884	3.18002e-06	2.49054e-05	AC099661.1	lincRNA
ENSG00000163898.10	19.6819	5.20748	1.25468	4.15045	3.31816e-05	0.000210569	LIPH	protein_coding
ENSG00000163915.7	7.1566	6.23483	1.87391	3.32718	0.000877284	0.00393342	IGF2BP2-AS1	antisense
ENSG00000171658.8	195.38	-1.73579	0.325955	-5.32524	1.00821e-07	1.02312e-06	NMRAL2P	transcribed_unprocessed_pseudogene
ENSG00000244405.8	3203.26	-1.17934	0.185794	-6.3476	2.18705e-10	3.22285e-09	ETV5	protein_coding
ENSG00000226859.1	59.3906	6.24046	0.941483	6.62833	3.39496e-11	5.64039e-10	LINC02051	lincRNA
ENSG00000145192.13	54530.9	-1.52452	0.233909	-6.51759	7.14441e-11	1.13705e-09	AHSG	protein_coding
ENSG00000181092.10	29.2122	8.26364	1.56679	5.27425	1.33301e-07	1.32848e-06	ADIPOQ	protein_coding
ENSG00000175077.5	4.29396	5.49786	2.11192	2.60325	0.00923453	0.0296959	RTP1	protein_coding
ENSG00000073282.13	12.1089	6.99167	1.72189	4.06046	4.89755e-05	0.000301023	TP63	protein_coding
ENSG00000090530.10	24.6948	8.02001	1.59439	5.03016	4.90082e-07	4.4363e-06	P3H2	protein_coding
ENSG00000113946.3	28.4903	4.72731	0.950219	4.97497	6.52591e-07	5.76935e-06	CLDN16	protein_coding
ENSG00000188729.6	4.9915	5.71551	2.03126	2.81378	0.00489631	0.0174232	OSTN	protein_coding
ENSG00000214146.2	9.08269	3.41027	1.36042	2.50678	0.0121837	0.0374946	LINC02026	lincRNA
ENSG00000230102.7	48.2515	3.23025	0.578482	5.58401	2.35031e-08	2.65942e-07	LINC02028	processed_transcript
ENSG00000178772.7	1140.32	-3.20486	0.261724	-12.2452	1.78271e-34	1.8057e-32	CPN2	protein_coding
ENSG00000172061.8	8.81425	5.04696	1.78094	2.83387	0.0045988	0.0165177	LRRC15	protein_coding
ENSG00000231770.5	77.7673	1.20893	0.409664	2.95102	0.00316727	0.0119992	TMEM44-AS1	antisense
ENSG00000185112.5	546.864	2.42243	0.249435	9.71166	2.68922e-22	1.23772e-20	FAM43A	protein_coding
ENSG00000252620.1	18.8722	-1.96964	0.811934	-2.42586	0.015272	0.0452496	RNU6ATAC24P	snRNA
ENSG00000224769.1	3.70814	5.29009	2.20913	2.39465	0.0166363	0.0485684	MUC20P1	unprocessed_pseudogene
ENSG00000176945.17	23.1932	3.34275	0.873953	3.82486	0.000130848	0.000729532	MUC20	protein_coding
ENSG00000213123.11	11.7162	3.81664	1.22923	3.10491	0.00190334	0.007715	TCTEX1D2	protein_coding
ENSG00000235897.1	72.6994	3.30121	0.500169	6.6002	4.10602e-11	6.75502e-10	TM4SF19-AS1	antisense
ENSG00000174007.8	32.4553	1.73317	0.625289	2.7718	0.00557476	0.0194972	CEP19	protein_coding
ENSG00000270170.2	681.395	-1.16044	0.222103	-5.22477	1.74372e-07	1.70474e-06	NCBP2-AS2	protein_coding
ENSG00000161267.12	819.647	1.5868	0.215399	7.3668	1.74774e-13	3.80661e-12	BDH1	protein_coding
ENSG00000185621.11	170.279	1.10583	0.30729	3.59866	0.000319863	0.00161425	LMLN	protein_coding
ENSG00000226435.10	5.61657	5.8878	1.97842	2.97601	0.00292022	0.0111783	ANKRD18DP	transcribed_unprocessed_pseudogene
ENSG00000169020.10	866.409	-1.12904	0.265682	-4.24961	2.14143e-05	0.000141517	ATP5ME	protein_coding
ENSG00000168993.15	30.0305	-1.86359	0.648564	-2.87341	0.00406065	0.0148351	CPLX1	protein_coding
ENSG00000127419.17	266.795	1.24882	0.305176	4.09212	4.27441e-05	0.000265054	TMEM175	protein_coding
ENSG00000145217.14	650.058	-3.27953	0.302065	-10.857	1.84676e-27	1.2125e-25	SLC26A1	protein_coding
ENSG00000127415.13	105.71	1.50743	0.393971	3.82624	0.000130114	0.000726182	IDUA	protein_coding
ENSG00000127418.15	2194.12	-2.71526	0.218426	-12.4311	1.77262e-35	1.91661e-33	FGFRL1	protein_coding
ENSG00000159674.12	831.407	-1.97324	0.248205	-7.95002	1.86478e-15	4.85753e-14	SPON2	protein_coding
ENSG00000163950.13	1655.89	-1.24753	0.185801	-6.71435	1.88906e-11	3.22704e-10	SLBP	protein_coding
ENSG00000270195.2	34.9064	-1.53903	0.602416	-2.55477	0.0106258	0.0334939	AC016773.1	lincRNA
ENSG00000068078.18	7497.73	-1.35656	0.211207	-6.4229	1.33702e-10	2.04318e-09	FGFR3	protein_coding
ENSG00000168924.15	3000.72	-1.2734	0.217674	-5.85	4.91574e-09	6.10757e-08	LETM1	protein_coding
ENSG00000185049.14	1368.08	-1.11062	0.221752	-5.00838	5.48902e-07	4.9181e-06	NELFA	protein_coding
ENSG00000249673.6	1158.07	3.31478	0.221451	14.9685	1.18025e-50	2.43623e-48	NOP14-AS1	antisense
ENSG00000087269.16	2738.15	-1.03876	0.1891	-5.49319	3.94728e-08	4.30206e-07	NOP14	protein_coding
ENSG00000188981.11	44.5016	1.59104	0.533696	2.98118	0.00287142	0.0110085	MSANTD1	protein_coding
ENSG00000163956.12	8438.85	1.05257	0.215774	4.87814	1.07092e-06	9.13568e-06	LRPAP1	protein_coding
ENSG00000184160.7	2007.52	-1.30071	0.21357	-6.09032	1.12684e-09	1.52145e-08	ADRA2C	protein_coding
ENSG00000251271.3	48.6406	7.55	1.51474	4.98434	6.21729e-07	5.51082e-06	ALG1L7P	unprocessed_pseudogene
ENSG00000145220.14	1251.62	-1.27778	0.196191	-6.51292	7.37024e-11	1.17094e-09	LYAR	protein_coding
ENSG00000168824.14	176.719	7.08559	0.709785	9.98272	1.81419e-23	8.98751e-22	NSG1	protein_coding
ENSG00000152953.13	4.29396	5.49786	2.11192	2.60325	0.00923453	0.0296959	STK32B	protein_coding
ENSG00000072840.13	845.731	-1.82267	0.215602	-8.45384	2.81881e-17	8.61032e-16	EVC	protein_coding
ENSG00000181215.15	6.60702	6.12101	1.90507	3.21301	0.00131352	0.00559646	C4orf50	protein_coding
ENSG00000109501.13	3580.88	-1.30679	0.201598	-6.4822	9.03975e-11	1.41637e-09	WFS1	protein_coding
ENSG00000246526.2	286.373	1.65007	0.263307	6.2667	3.68779e-10	5.2857e-09	LINC002481	lincRNA
ENSG00000279859.2	58.1466	1.70564	0.487218	3.50077	0.000463913	0.00224038	AC093323.2	TEC
ENSG00000163993.7	3783.74	1.02353	0.201918	5.06906	3.99783e-07	3.67135e-06	S100P	protein_coding
ENSG00000173013.5	47.3183	2.2383	0.541508	4.13346	3.5735e-05	0.000225283	CCDC96	protein_coding
ENSG00000184985.16	1102.03	8.59559	0.478922	17.9478	4.99474e-72	2.61715e-69	SORCS2	protein_coding
ENSG00000196526.10	989.357	-1.38692	0.208128	-6.66376	2.66915e-11	4.49206e-10	AFAP1	protein_coding
ENSG00000163995.20	18.2813	3.18935	0.910945	3.50114	0.000463265	0.00223805	ABLIM2	protein_coding
ENSG00000125089.17	1415.44	-1.5929	0.232794	-6.8425	7.78203e-12	1.38496e-10	SH3TC1	protein_coding
ENSG00000250268.3	4.44192	5.54943	2.09681	2.6466	0.00813049	0.0267304	ALG1L14P	unprocessed_pseudogene
ENSG00000229924.3	31.8605	8.39065	1.55622	5.3917	6.97961e-08	7.28913e-07	FAM90A26	protein_coding
ENSG00000250613.1	8.92012	4.02289	1.44954	2.7753	0.0055151	0.0193273	AC110768.2	processed_pseudogene
ENSG00000250371.1	19.4438	-2.38074	0.821386	-2.89844	0.00375021	0.0138815	AC007370.2	lincRNA
ENSG00000247624.6	25.1123	2.4598	0.731823	3.36119	0.000776072	0.00353843	CPEB2-DT	lincRNA
ENSG00000137449.15	451.063	1.25465	0.270501	4.63824	3.5139e-06	2.73352e-05	CPEB2	protein_coding
ENSG00000007062.11	408.176	-1.05994	0.231867	-4.57133	4.84639e-06	3.66601e-05	PROM1	protein_coding
ENSG00000169744.13	9.24923	6.60567	1.78564	3.69934	0.000216165	0.00114078	LDB2	protein_coding
ENSG00000047662.4	14.1351	3.66479	1.09422	3.34922	0.000810395	0.00367157	FAM184B	protein_coding
ENSG00000145147.20	42.028	2.08561	0.56438	3.69541	0.000219535	0.00115633	SLIT2	protein_coding
ENSG00000280650.1	3.81686	5.32794	2.18098	2.44291	0.0145693	0.043475	KCNIP4-IT1	lincRNA
ENSG00000109689.16	594.309	-1.07662	0.229574	-4.68964	2.73689e-06	2.16402e-05	STIM2	protein_coding
ENSG00000169299.14	2029.29	1.13913	0.181907	6.26219	3.79617e-10	5.42677e-09	PGM2	protein_coding
ENSG00000249863.2	86.9968	1.68673	0.404589	4.169	3.05944e-05	0.000195866	AC021106.1	processed_pseudogene
ENSG00000134962.7	1554	-3.3541	0.217546	-15.4179	1.24066e-53	2.8407e-51	KLB	protein_coding
ENSG00000109814.12	13715.2	-1.31411	0.169654	-7.74582	9.49667e-15	2.30415e-13	UGDH	protein_coding
ENSG00000163683.12	1271.39	1.89867	0.193512	9.81166	1.00307e-22	4.71219e-21	SMIM14	protein_coding
ENSG00000205794.4	17.7767	3.67375	0.984076	3.7332	0.000189064	0.00101326	AC098591.1	transcribed_processed_pseudogene
ENSG00000163694.15	1647.41	3.37779	0.193523	17.4542	3.19683e-68	1.27268e-65	RBM47	protein_coding
ENSG00000263642.1	14.273	3.02072	1.09578	2.7567	0.00583877	0.020248	MIR4802	miRNA
ENSG00000064042.18	22.3545	4.79526	1.08562	4.41708	1.00045e-05	7.11356e-05	LIMCH1	protein_coding
ENSG00000188848.16	4.36944	5.52781	2.12236	2.60456	0.00919927	0.029635	BEND4	protein_coding
ENSG00000124406.16	176.378	1.39516	0.314934	4.43002	9.42244e-06	6.74549e-05	ATP8A1	protein_coding
ENSG00000259959.1	241.414	-1.12635	0.273096	-4.12437	3.71748e-05	0.000233603	AC107068.1	lincRNA
ENSG00000163293.12	608.63	1.94451	0.228375	8.51455	1.67236e-17	5.22555e-16	NIPAL1	protein_coding
ENSG00000182223.7	3.88933	5.35264	2.18051	2.45476	0.0140978	0.0424025	ZAR1	protein_coding
ENSG00000248583.1	1511.56	1.60557	0.195311	8.22056	2.02557e-16	5.73708e-15	AC119751.3	unprocessed_pseudogene
ENSG00000250753.2	267.783	1.86788	0.291347	6.41119	1.44387e-10	2.19783e-09	AC119751.4	processed_pseudogene
ENSG00000163069.12	777.221	1.24024	0.20565	6.03083	1.63122e-09	2.15442e-08	SGCB	protein_coding
ENSG00000163071.11	1434.09	2.28634	0.18987	12.0416	2.14654e-33	2.074e-31	SPATA18	protein_coding
ENSG00000226950.6	2195.1	-1.73733	0.213611	-8.13314	4.18322e-16	1.15365e-14	DANCR	processed_transcript
ENSG00000226887.8	13.6335	2.95901	1.02708	2.881	0.00396414	0.0145369	ERVMER34-1	protein_coding
ENSG00000184178.16	436.178	-1.39055	0.234501	-5.92981	3.03291e-09	3.86699e-08	SCFD2	protein_coding
ENSG00000109220.11	787.078	1.13581	0.219154	5.18272	2.18673e-07	2.10388e-06	CHIC2	protein_coding
ENSG00000128039.11	220.416	-1.40185	0.297383	-4.71394	2.4297e-06	1.938e-05	SRD5A3	protein_coding
ENSG00000090989.18	1067.31	1.09784	0.204529	5.36767	7.97595e-08	8.23496e-07	EXOC1	protein_coding
ENSG00000109265.14	340.541	-1.70348	0.253775	-6.71255	1.91246e-11	3.26292e-10	KIAA1211	protein_coding
ENSG00000128059.8	2064.97	-1.30242	0.181831	-7.16281	7.90416e-13	1.5859e-11	PPAT	protein_coding
ENSG00000283156.1	4.10977	5.43287	2.14332	2.53479	0.0112516	0.035125	AC068620.3	transcribed_unprocessed_pseudogene
ENSG00000128050.8	7552.13	-1.4592	0.179736	-8.11857	4.71727e-16	1.29568e-14	PAICS	protein_coding
ENSG00000163453.11	563.352	4.50495	0.261969	17.1965	2.81964e-66	9.97749e-64	IGFBP7	protein_coding
ENSG00000150471.16	14.0655	4.098	1.17622	3.48405	0.000493895	0.00237214	ADGRL3	protein_coding
ENSG00000145242.13	5.42937	5.83221	2.0244	2.88096	0.0039646	0.0145369	EPHA5	protein_coding
ENSG00000250026.5	4.62311	5.60187	2.08403	2.688	0.0071881	0.0241319	TMPRSS11BNL	transcribed_unprocessed_pseudogene
ENSG00000185873.7	7.90216	3.8273	1.52009	2.51781	0.0118089	0.0365258	TMPRSS11B	protein_coding
ENSG00000162840.4	42.4302	1.73384	0.545855	3.17639	0.00149123	0.006251	MT2P1	processed_pseudogene
ENSG00000087128.10	4.62612	5.60943	2.08411	2.69153	0.00711251	0.0239371	TMPRSS11E	protein_coding
ENSG00000248635.1	4.18525	5.46428	2.13403	2.56054	0.0104509	0.0330229	AC147055.1	unprocessed_pseudogene
ENSG00000251685.3	225.157	2.00455	0.318424	6.29521	3.06982e-10	4.44439e-09	UGT2B27P	unprocessed_pseudogene
ENSG00000248763.2	172.62	1.1277	0.34167	3.30055	0.000964939	0.00427994	AC111000.2	unprocessed_pseudogene
ENSG00000250696.5	15.2284	4.22285	1.16347	3.62953	0.000283935	0.00145148	AC111000.4	antisense
ENSG00000213759.9	28.2151	3.46825	0.803394	4.317	1.58163e-05	0.000107602	UGT2B11	protein_coding
ENSG00000109205.16	300.743	-2.53584	0.271941	-9.32497	1.11015e-20	4.604e-19	ODAM	protein_coding
ENSG00000178522.14	5.54409	5.87073	1.99598	2.94127	0.00326866	0.0123295	AMBN	protein_coding
ENSG00000132465.11	4.58687	5.59151	2.08123	2.68663	0.00721766	0.0241953	JCHAIN	protein_coding
ENSG00000173542.8	2304.95	1.22941	0.192031	6.40218	1.53178e-10	2.32645e-09	MOB1B	protein_coding
ENSG00000080493.17	11.2869	3.29398	1.2469	2.64173	0.00824836	0.0270547	SLC4A4	protein_coding
ENSG00000156140.10	7.74243	6.34653	1.85297	3.42505	0.000614678	0.00287472	ADAMTS3	protein_coding
ENSG00000250220.1	47.6159	1.26625	0.522466	2.42361	0.0153673	0.0454825	AC053527.1	antisense
ENSG00000221639.1	21.3852	2.29295	0.783251	2.92747	0.00341728	0.0128146	RF00334	snoRNA
ENSG00000169429.11	209.216	2.31435	0.351313	6.5877	4.46688e-11	7.2836e-10	CXCL8	protein_coding
ENSG00000163738.18	293.611	-1.37238	0.257092	-5.33807	9.39414e-08	9.56153e-07	MTHFD2L	protein_coding
ENSG00000169116.11	14.6993	4.15963	1.19147	3.49118	0.000480885	0.00231619	PARM1	protein_coding
ENSG00000138769.11	8.55457	4.99871	1.80626	2.76743	0.00565004	0.0197014	CDKL2	protein_coding
ENSG00000138744.15	340.284	-1.66048	0.250202	-6.63658	3.21052e-11	5.35683e-10	NAAA	protein_coding
ENSG00000156219.16	11.6318	6.9336	1.73238	4.00235	6.27166e-05	0.000375652	ART3	protein_coding
ENSG00000163749.17	13.208	7.11597	1.7135	4.1529	3.28291e-05	0.000208604	CCDC158	protein_coding
ENSG00000138771.16	119.735	6.25017	0.684997	9.12438	7.21506e-20	2.72661e-18	SHROOM3	protein_coding
ENSG00000138758.11	3340.35	-1.06315	0.18965	-5.60587	2.07206e-08	2.36125e-07	SEPT11	protein_coding
ENSG00000138764.15	762.412	1.31862	0.215124	6.12956	8.81246e-10	1.20964e-08	CCNG2	protein_coding
ENSG00000138759.19	15691.4	-1.87891	0.187076	-10.0436	9.80532e-24	4.9659e-22	FRAS1	protein_coding
ENSG00000138772.13	555.209	-1.54284	0.224319	-6.8779	6.07425e-12	1.09316e-10	ANXA3	protein_coding
ENSG00000249307.6	130.208	7.9727	1.09547	7.2779	3.39051e-13	7.13369e-12	LINC01088	processed_transcript
ENSG00000138669.9	16.8472	2.46668	0.897106	2.7496	0.00596682	0.0205942	PRKG2	protein_coding
ENSG00000152795.17	8222.97	-1.31513	0.185872	-7.07548	1.48934e-12	2.90064e-11	HNRNPDL	protein_coding
ENSG00000145284.12	24.8909	6.57507	1.57496	4.17475	2.98318e-05	0.000191524	SCD5	protein_coding
ENSG00000138678.11	253.373	-2.1935	0.282157	-7.77405	7.60177e-15	1.85099e-13	GPAT3	protein_coding
ENSG00000180769.9	36.474	1.88654	0.596836	3.1609	0.00157281	0.00654763	WDFY3-AS2	antisense
ENSG00000109339.22	18.5405	5.11636	1.28415	3.98423	6.76999e-05	0.000402229	MAPK10	protein_coding
ENSG00000163629.13	15.4515	5.87283	1.671	3.51456	0.00044048	0.00214187	PTPN13	protein_coding
ENSG00000198189.11	2328.97	-1.04346	0.192495	-5.42071	5.9364e-08	6.27178e-07	HSD17B11	protein_coding
ENSG00000118785.14	8233.93	-2.51683	0.177047	-14.2156	7.33259e-46	1.22571e-43	SPP1	protein_coding
ENSG00000118777.12	763.287	-1.10512	0.264857	-4.17253	3.01242e-05	0.000193219	ABCG2	protein_coding
ENSG00000163644.15	404.024	-1.29504	0.236412	-5.4779	4.30412e-08	4.66299e-07	PPM1K	protein_coding
ENSG00000138646.9	75.7972	3.5547	0.525043	6.77031	1.28507e-11	2.23164e-10	HERC5	protein_coding
ENSG00000177432.7	47.244	1.37034	0.534266	2.56491	0.0103202	0.0326628	NAP1L5	protein_coding
ENSG00000180346.3	599.804	1.23185	0.229169	5.37529	7.64601e-08	7.92434e-07	TIGD2	protein_coding
ENSG00000251095.6	4172.17	2.73914	0.201586	13.588	4.71787e-42	7.10209e-40	AC097478.1	antisense
ENSG00000152208.13	10.4601	6.78285	1.74998	3.87595	0.000106208	0.000604514	GRID2	protein_coding
ENSG00000163106.10	4.69559	5.62254	2.09854	2.67927	0.00737836	0.0246159	HPGDS	protein_coding
ENSG00000138696.10	10.2818	5.27519	1.73856	3.03423	0.00241152	0.00945829	BMPR1B	protein_coding
ENSG00000182168.15	6.16615	6.02071	1.93317	3.11442	0.00184306	0.00751203	UNC5C	protein_coding
ENSG00000246090.6	265.858	2.79119	0.304096	9.17865	4.3654e-20	1.70173e-18	AP002026.1	antisense
ENSG00000198099.8	264.177	-1.15013	0.276222	-4.1638	3.12998e-05	0.000199631	ADH4	protein_coding
ENSG00000138823.13	687.727	-3.00073	0.246238	-12.1863	3.67717e-34	3.64334e-32	MTTP	protein_coding
ENSG00000164032.12	5727.48	-1.01202	0.195619	-5.17339	2.29888e-07	2.19626e-06	H2AFZ	protein_coding
ENSG00000254531.1	85.7503	1.31606	0.457916	2.87401	0.00405292	0.0148129	AP001816.1	lincRNA
ENSG00000153064.12	14.2321	4.73653	1.33484	3.54838	0.000387613	0.00191536	BANK1	protein_coding
ENSG00000164038.15	1008.19	-1.66837	0.201674	-8.27258	1.31089e-16	3.78368e-15	SLC9B2	protein_coding
ENSG00000169836.5	5.1757	5.76917	2.01462	2.86366	0.00418782	0.0152364	TACR3	protein_coding
ENSG00000168769.13	1641.08	1.47473	0.208386	7.07693	1.47381e-12	2.87246e-11	TET2	protein_coding
ENSG00000138777.20	716.91	-1.39484	0.216023	-6.45688	1.06883e-10	1.65469e-09	PPA2	protein_coding
ENSG00000236699.9	11.5564	5.45225	1.71342	3.18209	0.00146219	0.00615023	ARHGEF38	protein_coding
ENSG00000138801.9	2339.2	-1.23105	0.19255	-6.39343	1.62205e-10	2.4499e-09	PAPSS1	protein_coding
ENSG00000249604.1	4.69559	5.62254	2.09854	2.67927	0.00737836	0.0246159	AC096564.2	antisense
ENSG00000138796.16	1150.3	-1.09064	0.227306	-4.79812	1.60159e-06	1.32399e-05	HADH	protein_coding
ENSG00000138795.10	24.7201	3.10734	0.819439	3.79203	0.00014942	0.00082231	LEF1	protein_coding
ENSG00000198856.13	3706.95	-1.31563	0.18264	-7.20339	5.8734e-13	1.19875e-11	OSTC	protein_coding
ENSG00000188517.16	16.8046	6.00243	1.63562	3.66983	0.000242712	0.00126206	COL25A1	protein_coding
ENSG00000005059.16	125.838	-1.26957	0.343654	-3.69432	0.000220474	0.00116081	MCUB	protein_coding
ENSG00000205403.13	870.659	-1.42902	0.209853	-6.8096	9.78699e-12	1.73272e-10	CFI	protein_coding
ENSG00000170522.9	634.69	-1.67885	0.216245	-7.76363	8.25295e-15	2.00596e-13	ELOVL6	protein_coding
ENSG00000138792.10	5.90647	5.95404	1.98119	3.00528	0.00265339	0.0102782	ENPEP	protein_coding
ENSG00000145365.11	129.739	-2.2152	0.36766	-6.02513	1.68972e-09	2.22199e-08	TIFA	protein_coding
ENSG00000145362.18	198.765	-1.0728	0.285506	-3.75754	0.000171592	0.000928575	ANK2	protein_coding
ENSG00000145349.17	1613.41	-1.79377	0.18747	-9.5683	1.08682e-21	4.83866e-20	CAMK2D	protein_coding
ENSG00000164100.9	3.92858	5.37377	2.17699	2.46844	0.0135704	0.0410657	NDST3	protein_coding
ENSG00000269893.7	1264.36	-1.45712	0.195898	-7.43816	1.02094e-13	2.2764e-12	SNHG8	lincRNA
ENSG00000150961.15	2679.55	-1.66127	0.177506	-9.35895	8.05293e-21	3.38086e-19	SEC24D	protein_coding
ENSG00000172403.11	18.8789	3.238	0.900949	3.59398	0.000325661	0.00163895	SYNPO2	protein_coding
ENSG00000145384.3	41.1869	-1.6401	0.553231	-2.96458	0.00303097	0.0115616	FABP2	protein_coding
ENSG00000283050.2	431.246	1.38251	0.242864	5.69251	1.25182e-08	1.46766e-07	GTF2IP12	transcribed_unprocessed_pseudogene
ENSG00000138735.16	36.8613	1.97403	0.60587	3.25817	0.00112134	0.00487445	PDE5A	protein_coding
ENSG00000138738.10	7.19284	6.24146	1.87375	3.33101	0.000865329	0.00388838	PRDM5	protein_coding
ENSG00000138686.9	746.926	1.13288	0.227039	4.9898	6.04405e-07	5.36774e-06	BBS7	protein_coding
ENSG00000138741.11	7.1566	6.23483	1.87391	3.32718	0.000877284	0.00393342	TRPC3	protein_coding
ENSG00000249464.5	640.362	1.62679	0.27625	5.88884	3.88914e-09	4.90589e-08	LINC01091	lincRNA
ENSG00000164066.13	1196.83	1.30348	0.208973	6.23755	4.44464e-10	6.28454e-09	INTU	protein_coding
ENSG00000164070.12	4204.52	1.84358	0.187246	9.84579	7.14769e-23	3.40478e-21	HSPA4L	protein_coding
ENSG00000282855.1	52.2469	1.84734	0.499444	3.69878	0.000216634	0.00114281	AC093591.3	processed_pseudogene
ENSG00000251432.6	46.3644	3.25628	0.60777	5.35774	8.42671e-08	8.63493e-07	LINC02615	lincRNA
ENSG00000077684.16	1257.32	-2.21339	0.197225	-11.2227	3.15634e-29	2.30565e-27	JADE1	protein_coding
ENSG00000151012.13	3150.91	-3.87236	0.233885	-16.5567	1.43306e-61	4.48812e-59	SLC7A11	protein_coding
ENSG00000145391.13	63.3188	1.59954	0.461101	3.46895	0.000522488	0.0024919	SETD7	protein_coding
ENSG00000196782.12	17.9943	3.40976	0.943382	3.6144	0.00030104	0.00152802	MAML3	protein_coding
ENSG00000153132.13	120.338	-1.64931	0.366236	-4.5034	6.6876e-06	4.91416e-05	CLGN	protein_coding
ENSG00000170153.11	30.426	6.86536	1.55956	4.40211	1.07203e-05	7.56671e-05	RNF150	protein_coding
ENSG00000109452.12	8.19223	3.25397	1.35498	2.40148	0.0163288	0.0477835	INPP4B	protein_coding
ENSG00000164167.12	488.839	-1.5321	0.235354	-6.50977	7.52675e-11	1.19372e-09	LSM6	protein_coding
ENSG00000120519.14	325.658	-1.05037	0.256982	-4.0873	4.36415e-05	0.000270005	SLC10A7	protein_coding
ENSG00000071205.11	148.086	3.77193	0.400073	9.42812	4.17519e-21	1.77752e-19	ARHGAP10	protein_coding
ENSG00000234828.8	4.65935	5.61221	2.08964	2.68573	0.00723707	0.0242306	IQCM	protein_coding
ENSG00000198589.12	4629.15	-1.02756	0.173979	-5.90623	3.50023e-09	4.43379e-08	LRBA	protein_coding
ENSG00000164142.16	247.291	-1.52784	0.2754	-5.54773	2.89396e-08	3.2237e-07	FAM160A1	protein_coding
ENSG00000170006.12	55.3359	5.39016	0.79364	6.79169	1.10825e-11	1.94942e-10	TMEM154	protein_coding
ENSG00000109654.15	284.572	2.57645	0.281856	9.14104	6.18555e-20	2.35717e-18	TRIM2	protein_coding
ENSG00000121210.16	457.33	-1.17217	0.22716	-5.1601	2.46813e-07	2.33991e-06	TMEM131L	protein_coding
ENSG00000171564.11	826.324	-1.53693	0.211897	-7.25322	4.06979e-13	8.48428e-12	FGB	protein_coding
ENSG00000171560.15	3208.02	-1.48974	0.204882	-7.27121	3.56287e-13	7.4675e-12	FGA	protein_coding
ENSG00000171557.16	2873.66	-2.12943	0.17722	-12.0157	2.93764e-33	2.81837e-31	FGG	protein_coding
ENSG00000121207.12	4.18224	5.45598	2.15357	2.53346	0.0112943	0.035206	LRAT	protein_coding
ENSG00000120251.20	5.02774	5.72499	2.02926	2.82123	0.00478406	0.0170773	GRIA2	protein_coding
ENSG00000164125.15	12227.3	1.63033	0.172878	9.43053	4.08034e-21	1.73986e-19	GASK1B	protein_coding
ENSG00000248429.5	1084.71	1.44503	0.209797	6.88773	5.6689e-12	1.02563e-10	FAM198B-AS1	antisense
ENSG00000251073.1	90.3473	1.10497	0.389677	2.83562	0.0045737	0.0164406	NUDT19P5	processed_pseudogene
ENSG00000251429.1	44.4536	2.36397	0.596173	3.96524	7.33221e-05	0.000432519	AC098679.2	transcribed_processed_pseudogene
ENSG00000205208.5	658.554	-1.11052	0.2145	-5.17724	2.25193e-07	2.15899e-06	C4orf46	protein_coding
ENSG00000052795.13	1683.44	-1.31079	0.183861	-7.12924	1.00924e-12	1.99846e-11	FNIP2	protein_coding
ENSG00000145414.9	717.22	-1.07438	0.20661	-5.20003	1.99251e-07	1.92723e-06	NAF1	protein_coding
ENSG00000145416.13	9.32759	5.13059	1.76514	2.90662	0.00365352	0.0135882	MARCH1	protein_coding
ENSG00000052802.13	2674.39	-1.52392	0.186595	-8.16697	3.1624e-16	8.79245e-15	MSMO1	protein_coding
ENSG00000109472.14	9528.29	1.47665	0.174324	8.47072	2.4388e-17	7.51698e-16	CPE	protein_coding
ENSG00000207559.1	66.9408	1.79361	0.453763	3.95275	7.72594e-05	0.00045427	MIR578	miRNA
ENSG00000038295.8	5.3599	5.82087	2.00308	2.90596	0.00366133	0.013608	TLL1	protein_coding
ENSG00000129116.19	743.078	1.83202	0.247609	7.39883	1.37391e-13	3.02872e-12	PALLD	protein_coding
ENSG00000279384.1	29.9998	1.80355	0.687175	2.62459	0.00867538	0.0282681	AC080188.2	TEC
ENSG00000154447.15	870.679	-1.1796	0.216775	-5.44161	5.28014e-08	5.63085e-07	SH3RF1	protein_coding
ENSG00000198948.12	171.489	1.6413	0.34646	4.73734	2.16544e-06	1.75028e-05	MFAP3L	protein_coding
ENSG00000250968.1	4.25772	5.48677	2.11613	2.59283	0.00951897	0.0304703	LINC02382	lincRNA
ENSG00000109586.12	95.4465	2.07839	0.405449	5.12613	2.95751e-07	2.77109e-06	GALNT7	protein_coding
ENSG00000272870.2	29.8649	-1.79844	0.64292	-2.79729	0.00515329	0.0181857	AC097534.2	antisense
ENSG00000164105.4	161.388	-1.10957	0.312552	-3.55005	0.000385165	0.00190395	SAP30	protein_coding
ENSG00000164120.14	13.2533	4.62551	1.33097	3.4753	0.000510275	0.00244177	HPGD	protein_coding
ENSG00000129128.13	4268.15	-1.01862	0.175273	-5.81162	6.18727e-09	7.55645e-08	SPCS3	protein_coding
ENSG00000218336.9	19.1268	3.26248	0.897353	3.63567	0.000277261	0.00142056	TENM3	protein_coding
ENSG00000151718.16	4139.73	-1.2618	0.182977	-6.89594	5.35108e-12	9.69421e-11	WWC2	protein_coding
ENSG00000173320.12	19.736	3.08869	0.886883	3.48263	0.000496505	0.00238342	STOX2	protein_coding
ENSG00000249056.1	17.0069	2.16468	0.859684	2.51799	0.0118025	0.0365105	AC099343.1	processed_pseudogene
ENSG00000109771.15	66.9689	1.70416	0.447324	3.80966	0.000139156	0.000770959	LRP2BP	protein_coding
ENSG00000205129.8	26.727	3.78128	0.836656	4.51952	6.19796e-06	4.59151e-05	C4orf47	protein_coding
ENSG00000154553.15	464.804	1.61711	0.229335	7.05128	1.77276e-12	3.40397e-11	PDLIM3	protein_coding
ENSG00000154556.18	1749.64	-2.04346	0.18458	-11.0709	1.73739e-28	1.20762e-26	SORBS2	protein_coding
ENSG00000164342.12	7.41616	4.78377	1.86885	2.55974	0.010475	0.0330874	TLR3	protein_coding
ENSG00000164344.16	11.5231	4.40984	1.39197	3.16806	0.00153458	0.00640318	KLKB1	protein_coding
ENSG00000251165.5	3.74438	5.30284	2.1958	2.41499	0.0157356	0.046361	F11-AS1	antisense
ENSG00000250829.2	35.3906	3.66643	0.710122	5.16309	2.42904e-07	2.3109e-06	AC108865.1	lincRNA
ENSG00000272218.1	21.3735	2.42593	0.782636	3.0997	0.00193718	0.00782989	AC108865.2	lincRNA
ENSG00000224807.5	134.852	3.79966	0.411144	9.24169	2.42635e-20	9.7079e-19	DUX4L9	unprocessed_pseudogene
ENSG00000286001.1	45.692	1.4245	0.558545	2.55037	0.0107609	0.0338711	AC021087.5	protein_coding
ENSG00000066230.11	14.8239	3.74442	1.09051	3.43365	0.00059551	0.0027966	SLC9A3	protein_coding
ENSG00000225138.7	91.724	1.25641	0.430153	2.92085	0.00349077	0.0130542	SLC9A3-AS1	processed_transcript
ENSG00000271781.1	73.8399	1.29603	0.436762	2.96736	0.00300373	0.0114666	AC026740.1	antisense
ENSG00000071539.14	1045.38	-1.18304	0.199148	-5.94053	2.84108e-09	3.6292e-08	TRIP13	protein_coding
ENSG00000145506.13	352.352	2.29921	0.270256	8.50753	1.77677e-17	5.52643e-16	NKD2	protein_coding
ENSG00000174358.16	14.0817	-3.81246	1.10731	-3.44298	0.000575346	0.0027136	SLC6A19	protein_coding
ENSG00000164362.19	378.629	-2.41357	0.262675	-9.18841	3.98694e-20	1.5608e-18	TERT	protein_coding
ENSG00000215218.4	426.766	8.68738	0.758332	11.4559	2.19643e-30	1.76018e-28	UBE2QL1	protein_coding
ENSG00000078295.16	8.51833	4.99296	1.80272	2.76968	0.00561122	0.0196011	ADCY2	protein_coding
ENSG00000271980.1	19.3473	2.8732	0.859668	3.34222	0.000831109	0.0037517	AC012640.4	antisense
ENSG00000164237.9	3964.12	2.30715	0.174382	13.2304	5.85744e-40	8.01999e-38	CMBL	protein_coding
ENSG00000252341.1	11.2668	2.65487	1.09079	2.4339	0.0149373	0.0443923	RF00019	misc_RNA
ENSG00000112977.15	3011.66	-1.05456	0.198372	-5.31609	1.0602e-07	1.07268e-06	DAP	protein_coding
ENSG00000169862.19	9.88895	3.54309	1.32876	2.66647	0.00766534	0.025427	CTNND2	protein_coding
ENSG00000039139.9	15.6085	4.25783	1.15085	3.69971	0.000215842	0.00113974	DNAH5	protein_coding
ENSG00000145569.6	226.645	3.53255	0.329189	10.7311	7.27467e-27	4.6096e-25	OTULINL	protein_coding
ENSG00000261360.1	69.7047	2.56753	0.489967	5.24022	1.60388e-07	1.57424e-06	AC010491.1	antisense
ENSG00000183666.17	832.749	-1.08816	0.210613	-5.16662	2.38362e-07	2.27244e-06	GUSBP1	transcribed_unprocessed_pseudogene
ENSG00000154162.14	4.58687	5.59151	2.08123	2.68663	0.00721766	0.0241953	CDH12	protein_coding
ENSG00000040731.10	15.0047	7.29953	1.69582	4.30443	1.6742e-05	0.000113165	CDH10	protein_coding
ENSG00000250337.6	6579.87	1.66694	0.19005	8.77104	1.77021e-18	5.98424e-17	PURPL	lincRNA
ENSG00000133401.16	18.1665	4.49102	1.11416	4.03087	5.55707e-05	0.000336774	PDZD2	protein_coding
ENSG00000113389.16	12.3629	4.52789	1.36728	3.31159	0.000927662	0.00413163	NPR3	protein_coding
ENSG00000242110.8	95.2735	-1.0962	0.411729	-2.66244	0.00775766	0.0257113	AMACR	protein_coding
ENSG00000082196.20	90.1449	-1.22396	0.393902	-3.10726	0.0018883	0.007668	C1QTNF3	protein_coding
ENSG00000215158.9	728.047	-1.18344	0.215698	-5.48657	4.09817e-08	4.45083e-07	AC138409.2	transcribed_unprocessed_pseudogene
ENSG00000215156.5	14.4223	3.7037	1.10074	3.36472	0.000766206	0.00350047	AC138409.1	processed_pseudogene
ENSG00000113494.17	546.408	-1.30547	0.236817	-5.51256	3.5365e-08	3.87607e-07	PRLR	protein_coding
ENSG00000164187.7	465.505	1.08448	0.237657	4.56323	5.03724e-06	3.80088e-05	LMBRD2	protein_coding
ENSG00000145604.15	1739.67	-3.10499	0.200581	-15.48	4.73778e-54	1.11285e-51	SKP2	protein_coding
ENSG00000248587.7	26.8539	2.80785	0.731508	3.83845	0.000123816	0.000694157	GDNF-AS1	antisense
ENSG00000168621.15	3211.73	3.17619	0.188795	16.8235	1.64209e-63	5.45634e-61	GDNF	protein_coding
ENSG00000164318.18	10.3457	4.26143	1.4271	2.98609	0.00282573	0.0108624	EGFLAM	protein_coding
ENSG00000251257.2	16.2277	3.87908	1.0563	3.67234	0.000240342	0.0012515	AC010457.1	antisense
ENSG00000145623.13	5039.39	1.2553	0.198698	6.31763	2.65603e-10	3.87206e-09	OSMR	protein_coding
ENSG00000082074.17	19.7788	7.70011	1.6223	4.74642	2.07052e-06	1.67853e-05	FYB1	protein_coding
ENSG00000182836.10	8.1863	6.43139	1.82944	3.5155	0.000438926	0.00213561	PLCXD3	protein_coding
ENSG00000112964.14	12.8429	3.96264	1.21148	3.27091	0.00107201	0.0046832	GHR	protein_coding
ENSG00000112972.15	3443.67	-1.97002	0.191971	-10.2621	1.04429e-24	5.69077e-23	HMGCS1	protein_coding
ENSG00000170571.12	10.2397	6.75189	1.75614	3.84474	0.00012068	0.000678674	EMB	protein_coding
ENSG00000151883.18	14.2048	2.77679	1.00333	2.76757	0.00564761	0.019698	PARP8	protein_coding
ENSG00000213949.9	1042.63	-1.47508	0.209006	-7.05763	1.69365e-12	3.27051e-11	ITGA1	protein_coding
ENSG00000286048.1	55.8519	7.75004	1.50855	5.13743	2.78524e-07	2.61778e-06	AC008966.3	antisense
ENSG00000247796.2	133.943	1.84996	0.352853	5.24286	1.58105e-07	1.55408e-06	AC008966.1	antisense
ENSG00000164287.12	8.25878	6.44294	1.82262	3.53499	0.00040779	0.00200307	CDC20B	protein_coding
ENSG00000152670.18	16.7047	4.35727	1.14164	3.81668	0.000135259	0.000752121	DDX4	protein_coding
ENSG00000134352.20	9938.44	-1.12133	0.186065	-6.02657	1.67472e-09	2.20441e-08	IL6ST	protein_coding
ENSG00000237705.1	11.5348	4.40613	1.38789	3.1747	0.00149993	0.00628362	AC008937.2	antisense
ENSG00000145632.15	1815.57	2.16226	0.185134	11.6794	1.62343e-31	1.40424e-29	PLK2	protein_coding
ENSG00000035499.13	1472.29	-1.14554	0.193637	-5.9159	3.30073e-09	4.19277e-08	DEPDC1B	protein_coding
ENSG00000130449.6	462.656	1.23019	0.23807	5.16736	2.37424e-07	2.26429e-06	ZSWIM6	protein_coding
ENSG00000251682.1	62.259	2.11966	0.479005	4.42513	9.63826e-06	6.8783e-05	AC122718.2	processed_pseudogene
ENSG00000250461.1	115.356	1.66605	0.372039	4.47816	7.52875e-06	5.47613e-05	AC122718.1	processed_pseudogene
ENSG00000178722.12	4.87978	5.6795	2.05906	2.7583	0.00581032	0.0201674	C5orf64	processed_transcript
ENSG00000113597.18	418.032	1.27299	0.241717	5.26644	1.39097e-07	1.37867e-06	TRAPPC13	protein_coding
ENSG00000123213.23	1703.88	-1.2415	0.194196	-6.39302	1.62645e-10	2.45517e-09	NLN	protein_coding
ENSG00000069020.18	3633.14	2.83113	0.178416	15.8681	1.05313e-56	2.75911e-54	MAST4	protein_coding
ENSG00000248803.1	46.7898	6.48405	1.13727	5.70144	1.18803e-08	1.39768e-07	AC092349.1	processed_pseudogene
ENSG00000249057.1	50.6368	9.05621	1.52924	5.92205	3.17961e-09	4.04647e-08	MAST4-IT1	sense_intronic
ENSG00000213830.3	35.7582	1.45338	0.602493	2.41228	0.0158532	0.0466291	CFL1P5	processed_pseudogene
ENSG00000152939.16	2348.35	1.86503	0.180084	10.3564	3.91238e-25	2.20249e-23	MARVELD2	protein_coding
ENSG00000253366.3	50.6579	-1.66485	0.579517	-2.87282	0.00406828	0.014861	AC139272.1	unprocessed_pseudogene
ENSG00000172062.16	1178.2	1.06604	0.222123	4.79933	1.59197e-06	1.31683e-05	SMN1	protein_coding
ENSG00000215630.6	229.437	-1.06839	0.282478	-3.78222	0.000155439	0.000851818	GUSBP9	unprocessed_pseudogene
ENSG00000271926.1	18.4232	3.73016	0.983892	3.79123	0.000149901	0.000824623	AC008972.1	lincRNA
ENSG00000272081.1	44.9157	2.04467	0.542743	3.7673	0.000165023	0.000898379	AC008972.2	lincRNA
ENSG00000157107.14	1520.19	1.3538	0.199211	6.79578	1.07728e-11	1.90108e-10	FCHO2	protein_coding
ENSG00000251493.5	10.4446	2.81822	1.17238	2.40385	0.0162234	0.0475207	FOXD1	protein_coding
ENSG00000164331.10	2278.58	3.40568	0.205185	16.5981	7.194e-62	2.30606e-59	ANKRA2	protein_coding
ENSG00000271714.1	119.837	3.24983	0.412823	7.87223	3.48369e-15	8.82977e-14	AC010501.1	antisense
ENSG00000145700.9	34.0494	3.18825	0.687388	4.63821	3.51434e-06	2.73352e-05	ANKRD31	protein_coding
ENSG00000113161.16	4061.82	-1.48366	0.190209	-7.80012	6.18504e-15	1.5155e-13	HMGCR	protein_coding
ENSG00000152359.14	629.512	1.53	0.222928	6.86321	6.73325e-12	1.20539e-10	POC5	protein_coding
ENSG00000122012.14	20.733	7.76815	1.61473	4.8108	1.50328e-06	1.24916e-05	SV2C	protein_coding
ENSG00000164220.7	5.50485	5.85582	1.98541	2.94943	0.00318361	0.0120545	F2RL2	protein_coding
ENSG00000171643.14	8.91724	5.0727	1.78179	2.84697	0.00441377	0.0159386	S100Z	protein_coding
ENSG00000132846.6	747.665	-1.90956	0.208622	-9.15317	5.52849e-20	2.12761e-18	ZBED3	protein_coding
ENSG00000238961.1	23.5762	-2.40846	0.751455	-3.20506	0.00135032	0.00574071	SNORA47	snoRNA
ENSG00000244019.1	6.6795	6.1353	1.90077	3.22779	0.00124751	0.00535206	RPS2P24	processed_pseudogene
ENSG00000171540.7	134.761	7.43338	0.893493	8.31946	8.83652e-17	2.60572e-15	OTP	protein_coding
ENSG00000213763.4	23.0744	-2.07136	0.761728	-2.71929	0.00654221	0.0222677	ACTBP2	processed_pseudogene
ENSG00000145685.14	1912.05	-1.20386	0.182586	-6.59336	4.29993e-11	7.03242e-10	LHFPL2	protein_coding
ENSG00000113273.17	3380.89	-1.65641	0.187453	-8.83641	9.88393e-19	3.41328e-17	ARSB	protein_coding
ENSG00000152413.14	835.102	-1.02639	0.215088	-4.77196	1.8244e-06	1.49053e-05	HOMER1	protein_coding
ENSG00000113296.14	26.4355	1.71672	0.70149	2.44724	0.0143953	0.0430785	THBS4	protein_coding
ENSG00000249042.5	117.513	-1.0148	0.350316	-2.89683	0.0037696	0.0139457	AC008771.1	antisense
ENSG00000251450.1	25.0505	1.76443	0.710234	2.4843	0.0129806	0.0395839	RASGRF2-AS1	antisense
ENSG00000145687.16	6.56494	4.61106	1.8909	2.43855	0.0147463	0.0439405	SSBP2	protein_coding
ENSG00000038427.16	1004.29	1.17727	0.204842	5.74721	9.07274e-09	1.08328e-07	VCAN	protein_coding
ENSG00000164176.13	15.3399	4.84031	1.31117	3.69158	0.000222862	0.00117136	EDIL3	protein_coding
ENSG00000250320.5	8.18029	6.42333	1.87046	3.43409	0.000594553	0.00279306	AC113383.1	antisense
ENSG00000113356.12	252.721	-2.27351	0.289818	-7.84462	4.34269e-15	1.09358e-13	POLR3G	protein_coding
ENSG00000164199.18	68.3117	1.12005	0.464576	2.4109	0.0159132	0.0467681	ADGRV1	protein_coding
ENSG00000248323.6	248.565	-1.27846	0.277383	-4.60898	4.04646e-06	3.11188e-05	LUCAT1	antisense
ENSG00000281357.2	152.245	1.64389	0.320883	5.12301	3.00698e-07	2.81453e-06	ARRDC3-AS1	lincRNA
ENSG00000249958.1	12.0034	3.86334	1.22747	3.1474	0.0016473	0.00682543	CCT7P2	processed_pseudogene
ENSG00000237187.8	101.284	1.62518	0.373863	4.34698	1.38024e-05	9.50881e-05	NR2F1-AS1	antisense
ENSG00000175745.13	830.76	-1.61226	0.202389	-7.96613	1.63719e-15	4.28928e-14	NR2F1	protein_coding
ENSG00000175471.19	13.0753	2.4128	0.990306	2.43642	0.0148336	0.0441475	MCTP1	protein_coding
ENSG00000164292.13	3180.51	1.05947	0.188637	5.61643	1.94939e-08	2.22798e-07	RHOBTB3	protein_coding
ENSG00000173221.14	1883.49	1.39106	0.18279	7.61015	2.73788e-14	6.37053e-13	GLRX	protein_coding
ENSG00000251348.1	115.034	1.73445	0.369502	4.69401	2.679e-06	2.12256e-05	HSPD1P11	processed_pseudogene
ENSG00000251513.2	41.0733	2.57817	0.651575	3.95683	7.59494e-05	0.000447243	LIX1-AS1	lincRNA
ENSG00000279232.2	26.386	5.04825	1.04346	4.83797	1.31175e-06	1.1021e-05	AC008522.1	antisense
ENSG00000173930.9	30.7304	-2.44611	0.688477	-3.55294	0.000380954	0.0018869	SLCO4C1	protein_coding
ENSG00000181751.10	144.017	-2.30792	0.346995	-6.65116	2.90783e-11	4.87867e-10	C5orf30	protein_coding
ENSG00000145743.15	336.776	-1.20695	0.252508	-4.77985	1.7543e-06	1.43804e-05	FBXL17	protein_coding
ENSG00000112893.9	4474.58	-1.12561	0.186761	-6.02701	1.67022e-09	2.19954e-08	MAN2A1	protein_coding
ENSG00000152495.11	8.87516	4.0257	1.47854	2.72276	0.00647386	0.0220783	CAMK4	protein_coding
ENSG00000134986.13	1543.8	-1.41955	0.185966	-7.6334	2.28643e-14	5.3521e-13	NREP	protein_coding
ENSG00000129595.13	9.86561	4.18609	1.44245	2.90207	0.00370701	0.0137422	EPB41L4A	protein_coding
ENSG00000238363.1	32.5643	-1.78722	0.616199	-2.9004	0.00372692	0.0138094	SNORA13	snoRNA
ENSG00000212122.3	28.5544	4.1272	0.84121	4.90627	9.28252e-07	8.01905e-06	TSSK1B	protein_coding
ENSG00000164221.13	105.808	-1.70545	0.367946	-4.63506	3.56831e-06	2.77075e-05	CCDC112	protein_coding
ENSG00000092421.16	5084.43	-1.26311	0.182192	-6.93283	4.12497e-12	7.57365e-11	SEMA6A	protein_coding
ENSG00000248445.5	63.7419	-1.12047	0.448062	-2.5007	0.0123949	0.0380234	SEMA6A-AS1	antisense
ENSG00000250891.1	3.81686	5.32794	2.18098	2.44291	0.0145693	0.043475	LINC02208	lincRNA
ENSG00000169570.10	212.053	-1.21267	0.280923	-4.31674	1.58352e-05	0.000107677	DTWD2	protein_coding
ENSG00000145779.8	1085.29	1.82018	0.203683	8.93631	4.02373e-19	1.42568e-17	TNFAIP8	protein_coding
ENSG00000133835.15	3419.44	-1.16452	0.183118	-6.35937	2.02588e-10	3.00486e-09	HSD17B4	protein_coding
ENSG00000113083.14	1654.86	-3.30263	0.215542	-15.3225	5.41065e-53	1.19857e-50	LOX	protein_coding
ENSG00000064692.19	5.1757	5.76917	2.01462	2.86366	0.00418782	0.0152364	SNCAIP	protein_coding
ENSG00000205302.7	2034.97	1.20301	0.201658	5.96558	2.43762e-09	3.13735e-08	SNX2	protein_coding
ENSG00000248752.2	19.7485	4.60892	1.11506	4.13334	3.57533e-05	0.000225294	AC116362.1	lincRNA
ENSG00000164904.18	9903.33	1.84529	0.172612	10.6904	1.12863e-26	7.03699e-25	ALDH7A1	protein_coding
ENSG00000164902.14	1549.12	1.10419	0.207772	5.31445	1.06981e-07	1.0816e-06	PHAX	protein_coding
ENSG00000113368.12	3101.83	-1.71855	0.188022	-9.14018	6.23513e-20	2.37132e-18	LMNB1	protein_coding
ENSG00000173926.6	266.779	1.24775	0.309367	4.03323	5.50157e-05	0.000333633	MARCH3	protein_coding
ENSG00000145794.17	11.819	6.95981	1.71819	4.05067	5.10718e-05	0.000311798	MEGF10	protein_coding
ENSG00000138829.12	949.086	8.37987	0.479904	17.4615	2.81222e-68	1.14365e-65	FBN2	protein_coding
ENSG00000113396.13	3.88933	5.35264	2.18051	2.45476	0.0140978	0.0424025	SLC27A6	protein_coding
ENSG00000072682.18	4505.23	1.59241	0.195163	8.15938	3.36745e-16	9.34348e-15	P4HA2	protein_coding
ENSG00000205089.7	6.42282	6.07914	1.91621	3.17248	0.00151145	0.0063231	CCNI2	protein_coding
ENSG00000164403.14	904.174	-1.57794	0.241781	-6.52631	6.7411e-11	1.07664e-09	SHROOM1	protein_coding
ENSG00000164406.7	186.774	-1.83575	0.311865	-5.88637	3.94761e-09	4.96892e-08	LEAP2	protein_coding
ENSG00000271128.1	3.81686	5.32794	2.18098	2.44291	0.0145693	0.043475	AC008608.1	processed_pseudogene
ENSG00000251169.2	37.4885	-1.63381	0.580153	-2.81617	0.00485993	0.0173187	LINC01843	lincRNA
ENSG00000247627.2	172.059	1.42227	0.394305	3.60702	0.000309728	0.00156803	MTND4P12	processed_pseudogene
ENSG00000069011.16	831.77	-1.56367	0.222734	-7.02034	2.21325e-12	4.20163e-11	PITX1	protein_coding
ENSG00000224186.8	167.282	-1.40112	0.323484	-4.33134	1.48205e-05	0.00010141	C5orf66	antisense
ENSG00000248753.1	19.9873	-1.87316	0.782744	-2.39307	0.0167079	0.0487305	AC008406.2	lincRNA
ENSG00000145832.14	4.95527	5.70597	2.03541	2.80335	0.00505741	0.0179007	SLC25A48	protein_coding
ENSG00000164616.16	1116.93	1.54306	0.232367	6.64062	3.12367e-11	5.2183e-10	FBXL21P	transcribed_unitary_pseudogene
ENSG00000120708.17	19384.5	-1.01881	0.197955	-5.14669	2.65122e-07	2.50217e-06	TGFBI	protein_coding
ENSG00000152377.14	21.3729	4.29448	1.00074	4.29129	1.77637e-05	0.000119243	SPOCK1	protein_coding
ENSG00000146021.15	30.3897	2.56409	0.675954	3.7933	0.00014866	0.000818623	KLHL3	protein_coding
ENSG00000177733.6	4937.5	-1.24646	0.205213	-6.074	1.24764e-09	1.67791e-08	HNRNPA0	protein_coding
ENSG00000078795.16	3.89234	5.36154	2.19579	2.44174	0.0146169	0.043593	PKD2L2	protein_coding
ENSG00000132563.16	1826.79	3.91475	0.215725	18.147	1.35595e-73	7.53991e-71	REEP2	protein_coding
ENSG00000120738.8	933.598	2.50136	0.261531	9.56428	1.1298e-21	5.01363e-20	EGR1	protein_coding
ENSG00000146006.8	6.12991	6.01299	1.93647	3.10514	0.0019019	0.00771146	LRRTM2	protein_coding
ENSG00000280987.4	45.188	-1.95275	0.533231	-3.66212	0.000250141	0.00129574	MATR3	protein_coding
ENSG00000281398.4	1487.64	-2.71084	0.226758	-11.9548	6.13058e-33	5.76e-31	SNHG4	lincRNA
ENSG00000252213.1	218.597	-1.38613	0.295943	-4.68377	2.81646e-06	2.22306e-05	SNORA74D	snoRNA
ENSG00000170464.10	251.08	1.5406	0.274654	5.60923	2.03227e-08	2.31979e-07	DNAJC18	protein_coding
ENSG00000184584.13	320.469	3.14576	0.274922	11.4424	2.56701e-30	2.05112e-28	TMEM173	protein_coding
ENSG00000158458.20	11.6741	4.43357	1.36377	3.25096	0.00115015	0.00498777	NRG2	protein_coding
ENSG00000254363.6	46.6358	-1.58758	0.577281	-2.7501	0.00595768	0.0205818	AC011379.2	processed_transcript
ENSG00000250069.1	81.8156	1.33597	0.432539	3.08868	0.00201049	0.00808918	AC011379.1	sense_intronic
ENSG00000249637.1	50.643	-1.90866	0.504962	-3.77981	0.000156946	0.000859217	AC008438.1	antisense
ENSG00000213523.10	1350.79	1.01277	0.220198	4.59937	4.2377e-06	3.24612e-05	SRA1	protein_coding
ENSG00000113108.19	27.4998	2.20439	0.729557	3.02154	0.00251492	0.00981437	APBB3	protein_coding
ENSG00000204967.11	6.27787	6.04923	1.93432	3.12732	0.00176407	0.00724206	PCDHA4	protein_coding
ENSG00000240184.7	58.8053	-1.33971	0.466059	-2.87454	0.00404611	0.01479	PCDHGC3	protein_coding
ENSG00000113578.18	24.7341	8.0232	1.58783	5.05293	4.35084e-07	3.97276e-06	FGF1	protein_coding
ENSG00000145819.17	2034.36	-1.42812	0.182223	-7.83724	4.60565e-15	1.15234e-13	ARHGAP26	protein_coding
ENSG00000113580.15	3515.09	1.28967	0.194427	6.63319	3.28513e-11	5.47127e-10	NR3C1	protein_coding
ENSG00000279679.1	80.5391	2.01849	0.455578	4.43062	9.39624e-06	6.73026e-05	AC091925.2	TEC
ENSG00000251205.2	5.50485	5.85582	1.98541	2.94943	0.00318361	0.0120545	AC016598.2	lincRNA
ENSG00000186314.11	294.938	-1.21736	0.270233	-4.50485	6.64188e-06	4.88847e-05	PRELID2	protein_coding
ENSG00000249363.1	21.7658	-2.0892	0.788257	-2.65041	0.00803942	0.0264809	AC011411.1	processed_pseudogene
ENSG00000156463.18	385.413	-3.22823	0.285897	-11.2916	1.44408e-29	1.08994e-27	SH3RF2	protein_coding
ENSG00000169302.16	4.9915	5.71551	2.03126	2.81378	0.00489631	0.0174232	STK32A	protein_coding
ENSG00000113657.13	22.1883	3.28141	0.841818	3.89801	9.69871e-05	0.00055716	DPYSL3	protein_coding
ENSG00000133710.15	14.1625	4.11119	1.1955	3.43889	0.000584103	0.00275109	SPINK5	protein_coding
ENSG00000169252.5	29.1879	5.19575	1.02374	5.07528	3.86918e-07	3.5604e-06	ADRB2	protein_coding
ENSG00000164284.15	1377.59	-1.0608	0.189843	-5.58777	2.30006e-08	2.60689e-07	GRPEL2	protein_coding
ENSG00000145882.11	94.8159	3.49355	0.44639	7.82623	5.02713e-15	1.24635e-13	PCYOX1L	protein_coding
ENSG00000249669.9	97.6481	1.58168	0.392472	4.03004	5.57666e-05	0.000337811	CARMN	lincRNA
ENSG00000183111.12	66.5453	3.57314	0.528051	6.76666	1.31792e-11	2.28576e-10	ARHGEF37	protein_coding
ENSG00000132915.11	8.11082	6.41541	1.82885	3.50788	0.000451689	0.00218989	PDE6A	protein_coding
ENSG00000164296.7	115.151	1.25543	0.360397	3.48347	0.000494967	0.0023768	TIGD6	protein_coding
ENSG00000182578.13	112.181	6.7509	0.799908	8.4396	3.18416e-17	9.6829e-16	CSF1R	protein_coding
ENSG00000113721.14	585.685	-2.53839	0.228836	-11.0926	1.36254e-28	9.59306e-27	PDGFRB	protein_coding
ENSG00000183876.9	335.414	-1.81583	0.250261	-7.25574	3.99482e-13	8.34076e-12	ARSI	protein_coding
ENSG00000070814.19	4485.42	-1.13434	0.210055	-5.4002	6.65657e-08	6.96756e-07	TCOF1	protein_coding
ENSG00000171992.13	146.895	1.71261	0.347243	4.93203	8.13807e-07	7.08654e-06	SYNPO	protein_coding
ENSG00000256235.2	496.114	-1.2642	0.264949	-4.77148	1.82878e-06	1.49367e-05	SMIM3	protein_coding
ENSG00000211445.12	4380.42	-1.26815	0.219196	-5.78544	7.2322e-09	8.77363e-08	GPX3	protein_coding
ENSG00000197043.14	2613.96	-1.90687	0.210883	-9.0423	1.53404e-19	5.62557e-18	ANXA6	protein_coding
ENSG00000198624.13	624.558	1.01956	0.250695	4.06695	4.76329e-05	0.000293234	CCDC69	protein_coding
ENSG00000196743.8	9736.36	3.23413	0.204566	15.8097	2.66685e-56	6.85505e-54	GM2A	protein_coding
ENSG00000086570.12	36.3054	8.57996	1.54726	5.54525	2.93538e-08	3.26851e-07	FAT2	protein_coding
ENSG00000155511.18	6.20239	6.02838	1.93133	3.12135	0.00180021	0.00736487	GRIA1	protein_coding
ENSG00000164574.16	2927.62	1.1553	0.177009	6.52678	6.71969e-11	1.07385e-09	GALNT10	protein_coding
ENSG00000241963.3	13.909	2.52101	0.985676	2.55765	0.0105383	0.0332487	RN7SL655P	misc_RNA
ENSG00000170271.11	2248.84	3.44116	0.190844	18.0313	1.10708e-72	5.91462e-70	FAXDC2	protein_coding
ENSG00000170624.13	3.96481	5.38582	2.16321	2.48974	0.0127837	0.0390667	SGCD	protein_coding
ENSG00000113249.12	136.711	-2.57401	0.365447	-7.04347	1.87511e-12	3.59038e-11	HAVCR1	protein_coding
ENSG00000055163.20	5270.34	1.59867	0.192336	8.31183	9.42348e-17	2.75791e-15	CYFIP2	protein_coding
ENSG00000164330.17	4.55064	5.58109	2.0812	2.68167	0.00732549	0.0244575	EBF1	protein_coding
ENSG00000135083.15	512.16	-1.37598	0.232712	-5.91279	3.36359e-09	4.26666e-08	CCNJL	protein_coding
ENSG00000164611.13	2157.38	1.23577	0.183194	6.74572	1.5227e-11	2.62588e-10	PTTG1	protein_coding
ENSG00000253522.6	234.125	-1.18711	0.275878	-4.30301	1.68491e-05	0.000113804	MIR3142HG	lincRNA
ENSG00000022355.17	4.3302	5.50888	2.11045	2.61029	0.00904663	0.029247	GABRA1	protein_coding
ENSG00000254186.2	24.8273	4.18136	0.922292	4.53366	5.79707e-06	4.32037e-05	AC113414.1	antisense
ENSG00000072571.20	1676.26	1.44116	0.207668	6.93976	3.92755e-12	7.22092e-11	HMMR	protein_coding
ENSG00000038274.17	1799.17	1.09919	0.183663	5.98481	2.16641e-09	2.80686e-08	MAT2B	protein_coding
ENSG00000145934.16	17.3631	7.51568	1.63999	4.58276	4.58869e-06	3.48948e-05	TENM2	protein_coding
ENSG00000113645.14	1257.23	-1.0559	0.196748	-5.36679	8.01487e-08	8.26575e-07	WWC1	protein_coding
ENSG00000134516.16	22.9738	4.8425	1.06657	4.54024	5.61891e-06	4.20369e-05	DOCK2	protein_coding
ENSG00000094755.17	4.62612	5.60943	2.08411	2.69153	0.00711251	0.0239371	GABRP	protein_coding
ENSG00000204764.14	13.5912	3.59584	1.12491	3.19655	0.00139083	0.00588902	RANBP17	protein_coding
ENSG00000174705.13	573.365	-1.22166	0.220942	-5.52934	3.21434e-08	3.55299e-07	SH3PXD2B	protein_coding
ENSG00000214357.8	374.168	2.52212	0.252087	10.005	1.44908e-23	7.2446e-22	NEURL1B	protein_coding
ENSG00000164463.12	788.59	1.75445	0.209371	8.37961	5.3102e-17	1.57783e-15	CREBRF	protein_coding
ENSG00000183072.10	132.302	1.02298	0.334848	3.05507	0.00225011	0.0089148	NKX2-5	protein_coding
ENSG00000113739.10	3777.31	-2.07703	0.174139	-11.9274	8.5177e-33	7.89394e-31	STC2	protein_coding
ENSG00000253686.1	236.81	1.70907	0.279844	6.10723	1.01373e-09	1.37555e-08	LINC01484	lincRNA
ENSG00000113742.13	4064.27	2.17078	0.177727	12.2141	2.61268e-34	2.62686e-32	CPEB4	protein_coding
ENSG00000145920.15	11106.1	-2.52278	0.198479	-12.7106	5.16575e-37	6.14634e-35	CPLX2	protein_coding
ENSG00000048162.20	1086.81	-1.49021	0.21775	-6.84366	7.71934e-12	1.3747e-10	NOP16	protein_coding
ENSG00000074276.10	662.52	-1.20255	0.218488	-5.50396	3.71355e-08	4.05544e-07	CDHR2	protein_coding
ENSG00000169258.7	155.51	-1.30894	0.313614	-4.17373	2.99654e-05	0.000192246	GPRIN1	protein_coding
ENSG00000160867.15	7980.24	-2.51807	0.224865	-11.1981	4.16461e-29	3.0099e-27	FGFR4	protein_coding
ENSG00000165671.20	17.668	2.71983	0.884257	3.07584	0.00209912	0.0084073	NSD1	protein_coding
ENSG00000169230.10	3880.96	-1.40364	0.240801	-5.82904	5.57456e-09	6.85424e-08	PRELID1	protein_coding
ENSG00000131183.11	11.797	-3.94291	1.23424	-3.19461	0.0014002	0.00592412	SLC34A1	protein_coding
ENSG00000198055.11	1041.99	-1.29053	0.230159	-5.60711	2.05728e-08	2.34539e-07	GRK6	protein_coding
ENSG00000246334.2	208.493	-1.22398	0.322154	-3.79938	0.00014506	0.000799765	PRR7-AS1	antisense
ENSG00000113758.13	2450.38	-1.23163	0.218758	-5.63008	1.80122e-08	2.06817e-07	DBN1	protein_coding
ENSG00000145911.6	31.6586	2.44856	0.652062	3.7551	0.00017327	0.000936722	N4BP3	protein_coding
ENSG00000145912.8	1619.56	-1.57331	0.238852	-6.58695	4.48957e-11	7.31622e-10	NHP2	protein_coding
ENSG00000050767.17	6.4953	6.09385	1.91565	3.1811	0.00146719	0.00616732	COL23A1	protein_coding
ENSG00000087116.16	718.22	1.23686	0.215039	5.75181	8.82932e-09	1.05607e-07	ADAMTS2	protein_coding
ENSG00000204661.9	9.58143	4.13317	1.42348	2.90356	0.00368947	0.0136949	C5orf60	protein_coding
ENSG00000250999.1	69.4555	2.15805	0.500775	4.30942	1.63682e-05	0.000110914	AC136604.3	antisense
ENSG00000161013.17	4249.77	-1.03049	0.192238	-5.36047	8.30077e-08	8.53153e-07	MGAT4B	protein_coding
ENSG00000197226.12	2988.95	-1.29661	0.198478	-6.53275	6.45737e-11	1.03557e-09	TBC1D9B	protein_coding
ENSG00000113300.12	2921.61	1.15385	0.186535	6.1857	6.18287e-10	8.62153e-09	CNOT6	protein_coding
ENSG00000161055.4	13.4857	3.24158	1.09214	2.96809	0.00299655	0.0114416	SCGB3A1	protein_coding
ENSG00000165810.17	6.23579	4.53582	1.9013	2.38564	0.0170495	0.049594	BTNL9	protein_coding
ENSG00000263667.2	4.40568	5.53868	2.10772	2.62781	0.00859362	0.0280319	AL035696.3	lincRNA
ENSG00000164379.7	5648.73	-1.09844	0.17255	-6.36594	1.94097e-10	2.8925e-09	FOXQ1	protein_coding
ENSG00000112699.11	2912.18	-1.4508	0.183864	-7.89061	3.00701e-15	7.68593e-14	GMDS	protein_coding
ENSG00000250903.8	1124.97	1.06767	0.19571	5.45539	4.88654e-08	5.23775e-07	GMDS-DT	lincRNA
ENSG00000124535.15	2330.95	-1.05713	0.187791	-5.62927	1.80979e-08	2.07714e-07	WRNIP1	protein_coding
ENSG00000021355.13	1742.27	1.01485	0.196506	5.16446	2.4113e-07	2.29643e-06	SERPINB1	protein_coding
ENSG00000170542.6	1158.75	2.27756	0.218758	10.4113	2.20159e-25	1.2709e-23	SERPINB9	protein_coding
ENSG00000137274.13	770.177	1.09164	0.205268	5.31811	1.04851e-07	1.06204e-06	BPHL	protein_coding
ENSG00000230269.6	837.172	1.92665	0.206668	9.32248	1.13651e-20	4.70616e-19	LINC02525	lincRNA
ENSG00000137285.10	330.448	-1.12021	0.269705	-4.15345	3.27496e-05	0.000208147	TUBB2B	protein_coding
ENSG00000168994.13	1332.55	-1.1095	0.225218	-4.92635	8.37817e-07	7.28631e-06	PXDC1	protein_coding
ENSG00000260604.2	885.697	-1.19283	0.22123	-5.39183	6.97424e-08	7.28631e-07	AL590004.3	lincRNA
ENSG00000145975.14	4.95527	5.70597	2.03541	2.80335	0.00505741	0.0179007	FAM217A	protein_coding
ENSG00000254821.1	15.2591	3.15583	1.01503	3.1091	0.00187661	0.00762767	AL136309.4	antisense
ENSG00000234817.2	47.2249	2.86984	0.565433	5.07547	3.86536e-07	3.55929e-06	AL136309.2	lincRNA
ENSG00000124787.13	568.666	-1.68579	0.243893	-6.91202	4.77803e-12	8.70234e-11	RPP40	protein_coding
ENSG00000271978.1	35.0066	-1.69388	0.605435	-2.79778	0.00514551	0.018163	AL359643.2	lincRNA
ENSG00000214113.10	1678.84	-1.19302	0.208213	-5.72982	1.00539e-08	1.19155e-07	LYRM4	protein_coding
ENSG00000124491.15	6.7129	4.64645	1.87337	2.48026	0.0131287	0.0399552	F13A1	protein_coding
ENSG00000216863.9	4.77107	5.64987	2.05488	2.74949	0.00596882	0.0205942	LY86-AS1	antisense
ENSG00000124782.20	7185.81	-1.44886	0.181093	-8.00063	1.23788e-15	3.2746e-14	RREB1	protein_coding
ENSG00000261189.1	363.215	-1.04647	0.251695	-4.1577	3.21464e-05	0.0002046	AL031058.1	antisense
ENSG00000239264.8	210.568	-1.16333	0.296481	-3.92379	8.7166e-05	0.000506939	TXNDC5	protein_coding
ENSG00000285219.1	96.1665	1.00354	0.373656	2.68573	0.00723706	0.0242306	AL591485.1	bidirectional_promoter_lncRNA
ENSG00000183674.11	4.21848	5.46751	2.16514	2.52525	0.0115617	0.0358998	LINC00518	lincRNA
ENSG00000111846.17	1254.6	-2.45623	0.197981	-12.4064	2.41272e-35	2.55795e-33	GCNT2	protein_coding
ENSG00000137434.11	18.8126	1.94367	0.814206	2.38719	0.0169775	0.0494269	C6orf52	protein_coding
ENSG00000111837.11	65.4601	3.98706	0.579097	6.88497	5.77995e-12	1.04365e-10	MAK	protein_coding
ENSG00000153157.13	9.81063	3.07623	1.24513	2.47062	0.0134881	0.0408662	SYCP2L	protein_coding
ENSG00000197977.4	2819.73	-1.37188	0.188608	-7.27375	3.49639e-13	7.34511e-12	ELOVL2	protein_coding
ENSG00000111859.17	12985.8	-1.29892	0.185158	-7.01521	2.29608e-12	4.34756e-11	NEDD9	protein_coding
ENSG00000112137.17	24.0996	3.22254	0.811001	3.97353	7.08146e-05	0.000418998	PHACTR1	protein_coding
ENSG00000145990.11	1021.74	-1.30908	0.201285	-6.50361	7.84125e-11	1.23999e-09	GFOD1	protein_coding
ENSG00000180537.13	3.81686	5.32794	2.18098	2.44291	0.0145693	0.043475	RNF182	protein_coding
ENSG00000201367.1	24.6204	2.66897	0.764794	3.48979	0.000483403	0.00232667	RNU6-522P	snRNA
ENSG00000229931.1	115.07	-1.08334	0.395331	-2.74034	0.00613762	0.0210991	AL137003.1	antisense
ENSG00000137177.20	2583.3	-1.08144	0.177208	-6.10265	1.04321e-09	1.41415e-08	KIF13A	protein_coding
ENSG00000137364.5	620.378	-1.05852	0.219369	-4.82528	1.39804e-06	1.16919e-05	TPMT	protein_coding
ENSG00000137393.9	1123.69	2.23076	0.200569	11.1221	9.78876e-29	6.94568e-27	RNF144B	protein_coding
ENSG00000272168.7	20.298	6.27456	1.60927	3.89901	9.65856e-05	0.000555204	CASC15	lincRNA
ENSG00000146038.12	10427.7	-1.1498	0.169432	-6.78621	1.15117e-11	2.01841e-10	DCDC2	protein_coding
ENSG00000112293.15	416.832	-1.1124	0.234238	-4.749	2.04429e-06	1.65875e-05	GPLD1	protein_coding
ENSG00000112294.12	2241.88	-1.0819	0.192549	-5.61883	1.92254e-08	2.19821e-07	ALDH5A1	protein_coding
ENSG00000112308.13	4271.18	1.16381	0.198253	5.87033	4.34922e-09	5.43842e-08	C6orf62	protein_coding
ENSG00000111913.18	36.0699	8.56673	1.554	5.51271	3.53346e-08	3.87429e-07	RIPOR2	protein_coding
ENSG00000168405.17	13.4258	4.65021	1.34604	3.45473	0.000550852	0.00260982	CMAHP	transcribed_unitary_pseudogene
ENSG00000079691.18	502.798	3.08018	0.256197	12.0227	2.69962e-33	2.59917e-31	CARMIL1	protein_coding
ENSG00000079689.14	71.3685	-3.23047	0.497922	-6.48791	8.70332e-11	1.36601e-09	SCGN	protein_coding
ENSG00000112337.10	118.919	-2.57984	0.385956	-6.6843	2.32023e-11	3.92667e-10	SLC17A2	protein_coding
ENSG00000112343.11	1943.34	2.56529	0.18543	13.8342	1.58443e-43	2.49544e-41	TRIM38	protein_coding
ENSG00000278637.1	276.24	-1.28739	0.364231	-3.53454	0.000408489	0.00200615	HIST1H4A	protein_coding
ENSG00000278705.1	8769.7	-2.09535	0.5616	-3.73103	0.000190698	0.00102081	HIST1H4B	protein_coding
ENSG00000274267.1	17370.4	-2.90881	0.530041	-5.48788	4.06776e-08	4.42276e-07	HIST1H3B	protein_coding
ENSG00000278463.1	4060.01	-4.49525	0.577477	-7.78429	7.01077e-15	1.71167e-13	HIST1H2AB	protein_coding
ENSG00000276410.3	2527.79	-4.05897	0.254657	-15.939	3.39849e-57	8.99016e-55	HIST1H2BB	protein_coding
ENSG00000234816.2	44.9881	-2.01897	0.631746	-3.19587	0.00139412	0.00590022	HIST1H2APS5	unprocessed_pseudogene
ENSG00000278272.1	12828.8	-2.48325	0.549399	-4.51995	6.18541e-06	4.58471e-05	HIST1H3C	protein_coding
ENSG00000187837.3	30873.7	-1.44741	0.24055	-6.01709	1.77582e-09	2.32585e-08	HIST1H1C	protein_coding
ENSG00000197061.4	13577.1	-2.51189	0.512856	-4.89784	9.68951e-07	8.34155e-06	HIST1H4C	protein_coding
ENSG00000180596.7	13335.3	-2.82086	0.253921	-11.1092	1.13152e-28	8.00795e-27	HIST1H2BC	protein_coding
ENSG00000180573.9	8715.39	-1.93549	0.256584	-7.54328	4.58306e-14	1.05202e-12	HIST1H2AC	protein_coding
ENSG00000168298.6	19227.6	-1.88321	0.240474	-7.83123	4.83119e-15	1.20325e-13	HIST1H1E	protein_coding
ENSG00000158373.8	9921.54	-2.0908	0.24941	-8.38299	5.16e-17	1.53487e-15	HIST1H2BD	protein_coding
ENSG00000217159.2	4.10977	5.43287	2.14332	2.53479	0.0112516	0.035125	LARP1P1	processed_pseudogene
ENSG00000274290.2	38.8494	2.12064	0.617984	3.43155	0.000600151	0.002815	HIST1H2BE	protein_coding
ENSG00000277157.1	7267.13	-2.98713	0.574621	-5.19844	2.00965e-07	1.94275e-06	HIST1H4D	protein_coding
ENSG00000277224.2	4136.79	-3.13337	0.258947	-12.1004	1.05081e-33	1.02256e-31	HIST1H2BF	protein_coding
ENSG00000276966.2	14278.2	-1.74589	0.546083	-3.19712	0.00138806	0.00587915	HIST1H4E	protein_coding
ENSG00000273802.2	6486.11	-1.85867	0.253984	-7.31809	2.51522e-13	5.35827e-12	HIST1H2BG	protein_coding
ENSG00000277075.2	8925.15	-2.37498	0.501592	-4.73489	2.19172e-06	1.76784e-05	HIST1H2AE	protein_coding
ENSG00000274750.2	255.303	-1.01161	0.275023	-3.67827	0.00023482	0.00122593	HIST1H3E	protein_coding
ENSG00000277775.1	972.473	-1.77606	0.294624	-6.02823	1.65768e-09	2.18514e-08	HIST1H3F	protein_coding
ENSG00000275713.2	994.371	-2.45371	0.554099	-4.42828	9.49867e-06	6.79292e-05	HIST1H2BH	protein_coding
ENSG00000158406.4	2337.95	-2.84721	0.57323	-4.96696	6.80093e-07	5.99692e-06	HIST1H4H	protein_coding
ENSG00000186470.14	452.119	-1.19328	0.228309	-5.2266	1.72659e-07	1.6886e-06	BTN3A2	protein_coding
ENSG00000261584.1	3.90349	-5.4781	2.19749	-2.4929	0.0126706	0.0387862	AL513548.1	lincRNA
ENSG00000272468.1	39.8086	6.25129	1.15718	5.40219	6.58312e-08	6.90151e-07	AL021807.1	lincRNA
ENSG00000124635.8	3513.51	-1.33648	0.252708	-5.28862	1.23239e-07	1.23407e-06	HIST1H2BJ	protein_coding
ENSG00000196787.3	7355.22	-1.58258	0.494992	-3.19718	0.0013878	0.00587893	HIST1H2AG	protein_coding
ENSG00000276180.1	15.2286	3.14548	0.997954	3.15193	0.00162195	0.0067296	HIST1H4I	protein_coding
ENSG00000197903.7	1245.86	-1.17216	0.256992	-4.56107	5.08944e-06	3.83921e-05	HIST1H2BK	protein_coding
ENSG00000274997.1	1093.64	-2.86098	0.564752	-5.06591	4.06457e-07	3.72887e-06	HIST1H2AH	protein_coding
ENSG00000096654.15	184.32	-1.26826	0.334945	-3.78647	0.000152802	0.000839056	ZNF184	protein_coding
ENSG00000185130.5	2939.86	-3.39034	0.268048	-12.6483	1.14345e-36	1.32577e-34	HIST1H2BL	protein_coding
ENSG00000196747.4	8664.81	-2.51951	0.522361	-4.82332	1.41191e-06	1.18007e-05	HIST1H2AI	protein_coding
ENSG00000278828.1	7881.9	-2.3084	0.582437	-3.96336	7.39034e-05	0.000435665	HIST1H3H	protein_coding
ENSG00000276368.1	6560.89	-3.29148	0.614919	-5.3527	8.66513e-08	8.85592e-07	HIST1H2AJ	protein_coding
ENSG00000273703.1	1474.62	-4.25881	0.632412	-6.73423	1.64798e-11	2.83297e-10	HIST1H2BM	protein_coding
ENSG00000197238.4	592.176	-1.59837	0.244788	-6.5296	6.59475e-11	1.05574e-09	HIST1H4J	protein_coding
ENSG00000273542.1	4045.93	-1.75138	0.244202	-7.17183	7.40031e-13	1.49471e-11	HIST1H4K	protein_coding
ENSG00000233822.4	4079.19	-1.64595	0.260083	-6.32854	2.47498e-10	3.62363e-09	HIST1H2BN	protein_coding
ENSG00000275221.1	639.882	-1.92061	0.629403	-3.05147	0.00227722	0.0090015	HIST1H2AK	protein_coding
ENSG00000276903.1	393.497	-2.37175	0.335845	-7.06203	1.64084e-12	3.17302e-11	HIST1H2AL	protein_coding
ENSG00000184357.4	2546.28	-3.11828	0.56956	-5.4749	4.37756e-08	4.7369e-07	HIST1H1B	protein_coding
ENSG00000197153.4	28.5548	-3.02369	0.737789	-4.09831	4.16183e-05	0.000258721	HIST1H3J	protein_coding
ENSG00000274641.1	5143.34	-2.17132	0.495701	-4.3803	1.18514e-05	8.2841e-05	HIST1H2BO	protein_coding
ENSG00000168126.3	21.2531	2.418	0.791048	3.05671	0.00223783	0.00887412	OR2W6P	unprocessed_pseudogene
ENSG00000124657.1	8.40394	3.30368	1.34461	2.45699	0.0140107	0.0422291	OR2B6	protein_coding
ENSG00000197279.4	179.336	1.93013	0.327784	5.88844	3.89859e-09	4.91555e-08	ZNF165	protein_coding
ENSG00000219891.2	21.5724	1.85909	0.767089	2.42356	0.0153692	0.0454834	ZSCAN12P1	transcribed_unprocessed_pseudogene
ENSG00000226314.8	138.874	1.07362	0.365566	2.93688	0.00331528	0.0124871	ZNF192P1	transcribed_unprocessed_pseudogene
ENSG00000204701.2	35.0592	-2.01708	0.608532	-3.31466	0.000917553	0.00409373	OR2J3	protein_coding
ENSG00000197171.6	12.5249	-2.67114	1.05115	-2.54116	0.0110484	0.0346139	AL672167.1	transcribed_unprocessed_pseudogene
ENSG00000214922.9	106.839	-1.45296	0.364719	-3.98378	6.78284e-05	0.00040264	HLA-F-AS1	processed_transcript
ENSG00000273340.1	60.6384	-1.85673	0.480386	-3.86509	0.000111048	0.000629179	MICE	transcribed_unprocessed_pseudogene
ENSG00000229390.1	57.0719	-1.23568	0.471422	-2.62116	0.00876302	0.0285162	MICD	unprocessed_pseudogene
ENSG00000204618.8	146.796	4.63717	0.437164	10.6074	2.75301e-26	1.68187e-24	RNF39	protein_coding
ENSG00000233892.1	81.1329	1.33669	0.411996	3.24442	0.00117688	0.00508589	PAIP1P1	processed_pseudogene
ENSG00000137404.14	531.066	-1.46003	0.275864	-5.29255	1.20621e-07	1.21052e-06	NRM	protein_coding
ENSG00000196230.13	48392	-1.86434	0.21925	-8.50328	1.84305e-17	5.72605e-16	TUBB	protein_coding
ENSG00000204580.13	4080.62	1.37876	0.198777	6.93624	4.02686e-12	7.39851e-11	DDR1	protein_coding
ENSG00000137411.17	2622.43	-1.60968	0.212631	-7.57032	3.72308e-14	8.59684e-13	VARS2	protein_coding
ENSG00000137310.12	541.39	-1.38546	0.232662	-5.95479	2.60401e-09	3.33732e-08	TCF19	protein_coding
ENSG00000206344.7	165.905	1.13658	0.305023	3.72622	0.000194371	0.00103844	HCG27	lincRNA
ENSG00000234745.11	1107.88	1.43699	0.223512	6.42915	1.28318e-10	1.96641e-09	HLA-B	protein_coding
ENSG00000206337.10	43.5296	1.73422	0.539127	3.21672	0.00129664	0.00553149	HCP5	sense_overlapping
ENSG00000213722.9	566.303	-2.11656	0.254948	-8.30193	1.02432e-16	2.98498e-15	DDAH2	protein_coding
ENSG00000204396.10	162.231	1.46635	0.311926	4.70095	2.58957e-06	2.05589e-05	VWA7	protein_coding
ENSG00000204394.13	6477.96	-1.35639	0.209844	-6.46379	1.02112e-10	1.58624e-09	VARS	protein_coding
ENSG00000204371.11	2882.14	-1.49867	0.205507	-7.29253	3.04183e-13	6.43484e-12	EHMT2	protein_coding
ENSG00000166278.15	1051.37	-1.25765	0.252786	-4.97513	6.52025e-07	5.76622e-06	C2	protein_coding
ENSG00000204366.3	325.256	-2.76651	0.293144	-9.43738	3.82235e-21	1.63241e-19	ZBTB12	protein_coding
ENSG00000243649.8	253.049	-1.13819	0.292273	-3.89426	9.84988e-05	0.000564416	CFB	protein_coding
ENSG00000168477.19	154.111	2.20865	0.339638	6.50296	7.87522e-11	1.24392e-09	TNXB	protein_coding
ENSG00000204301.6	53.5052	1.5777	0.51465	3.06558	0.00217248	0.00865657	NOTCH4	protein_coding
ENSG00000168394.11	2764.74	2.26015	0.209577	10.7843	4.08294e-27	2.62377e-25	TAP1	protein_coding
ENSG00000235301.1	21.9136	3.99158	0.976145	4.08913	4.33003e-05	0.000268259	HLA-Z	unprocessed_pseudogene
[truncated: 4,200 more rows]

## Sheet: WT+ vs KO+ (ALL)
gene	baseMean	log2FoldChange	lfcSE	stat	pvalue	padj	genename	genetype
ENSG00000187583.10	54.9404	3.00139	0.549401	5.46302	4.68094e-08	7.38702e-07	PLEKHN1	protein_coding
ENSG00000187642.9	134.216	8.1438	1.08378	7.51427	5.72303e-14	1.86965e-12	PERM1	protein_coding
ENSG00000188157.15	12457.9	1.77816	0.304788	5.83408	5.40888e-09	9.94593e-08	AGRN	protein_coding
ENSG00000078808.16	3658.07	1.03861	0.289299	3.5901	0.000330553	0.00233241	SDF4	protein_coding
ENSG00000176022.6	430.891	2.28333	0.331649	6.88479	5.78741e-12	1.53406e-10	B3GALT6	protein_coding
ENSG00000184163.3	17.4686	2.10368	0.836087	2.51611	0.0118659	0.048582	C1QTNF12	protein_coding
ENSG00000162572.20	81.5048	1.71383	0.464141	3.69247	0.000222085	0.00164	SCNN1D	protein_coding
ENSG00000107404.20	896.945	1.14181	0.321104	3.5559	0.000376685	0.00261177	DVL1	protein_coding
ENSG00000162576.16	224.936	1.31036	0.397543	3.29614	0.000980243	0.0059966	MXRA8	protein_coding
ENSG00000235098.8	1022.65	6.63278	0.390173	16.9996	8.27053e-65	3.46742e-62	ANKRD65	protein_coding
ENSG00000225905.1	31.0406	6.01493	1.18915	5.05818	4.23273e-07	5.69686e-06	AL391244.1	antisense
ENSG00000205116.3	17.8638	4.15887	1.03884	4.00337	6.24462e-05	0.000535755	TMEM88B	protein_coding
ENSG00000225285.1	43.7174	3.75429	0.672618	5.58161	2.38306e-08	3.95421e-07	LINC01770	lincRNA
ENSG00000179403.12	504.768	2.13973	0.386597	5.53479	3.11593e-08	5.06339e-07	VWA1	protein_coding
ENSG00000215915.9	143.528	2.95561	0.442921	6.67298	2.50658e-11	6.16354e-10	ATAD3C	protein_coding
ENSG00000215014.5	43.1177	-1.45037	0.559282	-2.59327	0.00950677	0.0405258	AL645728.1	processed_transcript
ENSG00000197530.12	2403.88	2.2501	0.28156	7.99156	1.33244e-15	5.15654e-14	MIB2	protein_coding
ENSG00000169885.10	21.284	4.84594	1.08455	4.46817	7.88923e-06	8.31045e-05	CALML6	protein_coding
ENSG00000178821.13	361.782	2.02558	0.336891	6.01258	1.82593e-09	3.55781e-08	TMEM52	protein_coding
ENSG00000142609.18	60.5917	3.56367	0.552228	6.45326	1.09466e-10	2.50624e-09	CFAP74	protein_coding
ENSG00000067606.17	913.414	1.59927	0.321841	4.96911	6.72607e-07	8.70939e-06	PRKCZ	protein_coding
ENSG00000162585.17	782.857	2.23096	0.315483	7.07157	1.53188e-12	4.32e-11	FAAP20	protein_coding
ENSG00000157933.10	1885.39	2.42099	0.280541	8.62973	6.14985e-18	2.87012e-16	SKI	protein_coding
ENSG00000116151.14	426.872	1.11664	0.341183	3.27286	0.00106467	0.00643792	MORN1	protein_coding
ENSG00000269896.2	61.7355	3.7719	0.571953	6.59477	4.25912e-11	1.02134e-09	AL513477.1	transcribed_processed_pseudogene
ENSG00000149527.18	110.512	-2.88971	0.455895	-6.33856	2.31929e-10	5.1222e-09	PLCH2	protein_coding
ENSG00000197921.6	12.3703	7.15074	1.72332	4.1494	3.33348e-05	0.000305145	HES5	protein_coding
ENSG00000272449.2	22.5139	2.04519	0.767475	2.66483	0.00770279	0.0339222	AL139246.5	lincRNA
ENSG00000238164.6	455.4	5.45255	0.391695	13.9204	4.76237e-44	9.58379e-42	TNFRSF14-AS1	antisense
ENSG00000157873.17	1078.07	4.12869	0.321769	12.8312	1.09639e-37	1.62301e-35	TNFRSF14	protein_coding
ENSG00000157870.16	530.734	-1.1343	0.318587	-3.5604	0.000370293	0.00257597	PRXL2B	protein_coding
ENSG00000177133.10	10.1469	2.9331	1.15317	2.54352	0.0109743	0.0456143	LINC00982	antisense
ENSG00000272235.1	5.52292	-5.8587	1.98157	-2.95659	0.00311062	0.0158911	AL590438.1	lincRNA
ENSG00000162591.16	1359.88	2.41449	0.791195	3.0517	0.00227546	0.0122332	MEGF6	protein_coding
ENSG00000116213.16	924.082	2.59906	0.309608	8.39467	4.67203e-17	2.06546e-15	WRAP73	protein_coding
ENSG00000078900.15	94.3489	1.25821	0.4162	3.02309	0.00250208	0.0132199	TP73	protein_coding
ENSG00000227589.1	13.5423	-2.74717	1.09118	-2.5176	0.0118156	0.0484232	AL136528.1	antisense
ENSG00000235169.8	124.829	1.14717	0.404303	2.83742	0.00454804	0.0219253	SMIM1	protein_coding
ENSG00000236423.5	129.287	-1.63506	0.43665	-3.74456	0.000180709	0.00136328	LINC01134	lincRNA
ENSG00000233304.6	16.6443	-4.38672	1.16205	-3.77499	0.000160012	0.00122679	LINC01346	lincRNA
ENSG00000069424.14	1133.31	1.48741	0.306765	4.8487	1.24271e-06	1.51749e-05	KCNAB2	protein_coding
ENSG00000116254.18	252.048	2.97006	0.331385	8.96258	3.17183e-19	1.62169e-17	CHD5	protein_coding
ENSG00000158286.13	304.81	-1.07359	0.360894	-2.97482	0.00293161	0.0151271	RNF207	protein_coding
ENSG00000158292.7	219.442	2.15299	0.374327	5.75163	8.83845e-09	1.56571e-07	GPR153	protein_coding
ENSG00000069812.11	177.162	6.71899	0.640012	10.4982	8.8024e-26	7.2837e-24	HES2	protein_coding
ENSG00000187017.16	627.641	1.90325	0.329203	5.78138	7.409e-09	1.33505e-07	ESPN	protein_coding
ENSG00000215788.10	66.2543	1.192	0.471842	2.52627	0.0115281	0.047486	TNFRSF25	protein_coding
ENSG00000171680.21	551.562	1.26672	0.339697	3.72898	0.000192259	0.00144324	PLEKHG5	protein_coding
ENSG00000162413.16	1495.56	1.03569	0.269932	3.83685	0.000124623	0.000985257	KLHL21	protein_coding
ENSG00000224315.2	115.216	1.1294	0.401142	2.81547	0.00487059	0.0232045	RPL7P7	processed_pseudogene
ENSG00000228423.2	130.283	1.17803	0.440239	2.67588	0.00745332	0.0329736	AL357552.2	lincRNA
ENSG00000232208.2	35.0261	4.32403	0.780498	5.54009	3.02309e-08	4.92844e-07	AL139415.1	processed_pseudogene
ENSG00000142583.17	40.5522	3.488	0.653505	5.33737	9.43049e-08	1.41695e-06	SLC2A5	protein_coding
ENSG00000228526.7	2316.54	3.99015	0.268759	14.8466	7.32129e-50	1.9386e-47	MIR34AHG	lincRNA
ENSG00000234546.3	123.43	4.38518	0.473528	9.26065	2.03187e-20	1.1283e-18	LNCTAM34A	lincRNA
ENSG00000162444.12	378.845	-1.24241	0.292117	-4.25312	2.10809e-05	0.000200412	RBP7	protein_coding
ENSG00000116649.10	1999.37	-1.33142	0.296197	-4.49503	6.95597e-06	7.42373e-05	SRM	protein_coding
ENSG00000230337.1	40.4173	-1.72402	0.588256	-2.93072	0.00338174	0.0171093	EXOSC10-AS1	antisense
ENSG00000132879.14	1053.89	1.82438	0.314353	5.80361	6.49012e-09	1.17877e-07	FBXO44	protein_coding
ENSG00000162490.7	402.995	9.15342	0.883823	10.3566	3.90549e-25	3.07971e-23	DRAXIN	protein_coding
ENSG00000177674.16	1333.18	1.05198	0.305397	3.44462	0.000571861	0.0037628	AGTRAP	protein_coding
ENSG00000116691.11	342.126	-1.00482	0.314693	-3.19301	0.00140799	0.00816081	MIIP	protein_coding
ENSG00000162494.6	22.5338	8.00959	1.61683	4.95388	7.27469e-07	9.36514e-06	LRRC38	protein_coding
ENSG00000189337.17	1317.79	1.03708	0.265837	3.9012	9.57179e-05	0.000780734	KAZN	protein_coding
ENSG00000171729.14	522.365	-1.29332	0.306985	-4.21295	2.52052e-05	0.000236876	TMEM51	protein_coding
ENSG00000116771.6	2925.81	-1.28242	0.259649	-4.93907	7.84941e-07	1.00382e-05	AGMAT	protein_coding
ENSG00000187144.11	242.009	-1.09022	0.367796	-2.9642	0.00303474	0.0155667	SPATA21	protein_coding
ENSG00000080947.14	1100.41	2.61829	0.286747	9.13101	6.78637e-20	3.61676e-18	CROCCP3	transcribed_unprocessed_pseudogene
ENSG00000206652.1	39.3262	2.73872	0.624153	4.38789	1.14455e-05	0.000115349	RNU1-1	snRNA
ENSG00000219481.10	8852.28	1.61556	0.236909	6.81934	9.14619e-12	2.35972e-10	NBPF1	protein_coding
ENSG00000186301.8	2613.16	1.43746	0.318831	4.50854	6.52761e-06	6.99328e-05	MST1P2	unprocessed_pseudogene
ENSG00000280114.1	27.5907	4.23219	0.869793	4.86574	1.14029e-06	1.40666e-05	AL021920.2	unprocessed_pseudogene
ENSG00000236698.1	198.191	-1.06111	0.374037	-2.83692	0.00455513	0.021951	EIF1AXP1	processed_pseudogene
ENSG00000268869.5	49.2656	2.76492	0.572219	4.83193	1.35214e-06	1.63604e-05	ESPNP	transcribed_unprocessed_pseudogene
ENSG00000279151.1	16.8708	3.75694	1.02079	3.68044	0.000232831	0.00170954	AL021920.1	lincRNA
ENSG00000058453.17	614.286	1.84054	0.300822	6.11835	9.45465e-10	1.93045e-08	CROCC	protein_coding
ENSG00000227684.2	26.4301	1.92462	0.698824	2.75409	0.00588561	0.0271012	CROCCP4	transcribed_unprocessed_pseudogene
ENSG00000186715.11	523.577	1.65993	0.340142	4.88012	1.06024e-06	1.31913e-05	MST1L	transcribed_unprocessed_pseudogene
ENSG00000117122.13	192.874	-3.20317	0.411734	-7.7797	7.26957e-15	2.61237e-13	MFAP2	protein_coding
ENSG00000142619.4	227.513	7.58181	0.722318	10.4965	8.96346e-26	7.39265e-24	PADI3	protein_coding
ENSG00000159339.13	1962.54	10.0165	0.571687	17.521	9.90569e-69	5.08526e-66	PADI4	protein_coding
ENSG00000074964.17	4853.32	1.24586	0.28471	4.37588	1.20942e-05	0.000121359	ARHGEF10L	protein_coding
ENSG00000117148.8	13.1846	-2.69734	1.04772	-2.5745	0.0100385	0.042426	ACTL8	protein_coding
ENSG00000179023.8	1734.46	6.53003	0.338233	19.3063	4.75657e-83	3.85973e-80	KLHDC7A	protein_coding
ENSG00000169991.11	1282.99	1.25418	0.280932	4.46437	8.03035e-06	8.43439e-05	IFFO2	protein_coding
ENSG00000053372.5	1801.08	-1.32111	0.26456	-4.99362	5.92589e-07	7.75981e-06	MRTO4	protein_coding
ENSG00000158747.14	361.997	-1.4183	0.372437	-3.80817	0.000139999	0.00109059	NBL1	protein_coding
ENSG00000169914.6	1361.36	-1.07218	0.255494	-4.19651	2.7106e-05	0.000252537	OTUD3	protein_coding
ENSG00000188257.11	896.508	1.1245	0.302355	3.71914	0.000199901	0.00149238	PLA2G2A	protein_coding
ENSG00000162543.6	117.074	-1.93691	0.408352	-4.74322	2.10346e-06	2.47024e-05	UBXN10	protein_coding
ENSG00000162545.6	3066.3	-1.33902	0.24024	-5.57366	2.49443e-08	4.13084e-07	CAMK2N1	protein_coding
ENSG00000117245.12	149.076	2.08823	0.367488	5.68243	1.32792e-08	2.30212e-07	KIF17	protein_coding
ENSG00000235432.1	7.398	4.89503	1.82351	2.68441	0.00726583	0.0322691	AL663074.2	unprocessed_pseudogene
ENSG00000117298.16	3448.76	1.04579	0.298176	3.50729	0.000452703	0.00306782	ECE1	protein_coding
ENSG00000162551.14	1799.01	6.52321	0.311007	20.9745	1.12174e-97	1.56764e-94	ALPL	protein_coding
ENSG00000233431.1	6.51641	6.22155	1.90087	3.273	0.00106411	0.00643736	LINC02596	antisense
ENSG00000090686.15	2953.85	1.08547	0.276316	3.92835	8.55294e-05	0.000706333	USP48	protein_coding
ENSG00000142798.20	18996	3.4053	0.336919	10.1072	5.13467e-24	3.67985e-22	HSPG2	protein_coding
ENSG00000283234.1	13.5826	7.28598	1.7093	4.26256	2.021e-05	0.000193167	AL590556.2	transcribed_unitary_pseudogene
ENSG00000230068.2	95.8723	1.406	0.405491	3.46739	0.00052553	0.00349174	CDC42-IT1	sense_intronic
ENSG00000179546.4	95.3355	-4.05608	0.500873	-8.09802	5.58599e-16	2.22335e-14	HTR1D	protein_coding
ENSG00000271420.1	44.2177	1.39295	0.547836	2.54264	0.0110018	0.0456987	AL109936.2	lincRNA
ENSG00000204219.10	2879.03	1.20699	0.27032	4.46503	8.00557e-06	8.41187e-05	TCEA3	protein_coding
ENSG00000007968.7	1265	-2.84479	0.287336	-9.90056	4.13938e-23	2.74739e-21	E2F2	protein_coding
ENSG00000197880.8	22.9442	2.86352	0.834614	3.43095	0.000601471	0.00393806	MDS2	lincRNA
ENSG00000117305.15	821.913	1.02413	0.271175	3.77662	0.000158968	0.00122065	HMGCL	protein_coding
ENSG00000225315.2	53.8447	-2.93769	0.579289	-5.07121	3.95299e-07	5.34035e-06	AL591178.1	antisense
ENSG00000142677.4	217.855	-1.27984	0.383512	-3.33716	0.00084638	0.00529488	IL22RA1	protein_coding
ENSG00000158055.15	371.343	7.16036	0.532151	13.4555	2.85777e-41	5.09838e-39	GRHL3	protein_coding
ENSG00000184454.7	17.7305	-2.3476	0.88277	-2.65936	0.00782896	0.0343576	NCMAP	protein_coding
ENSG00000169504.15	5625.94	-1.60008	0.254621	-6.28414	3.29664e-10	7.15504e-09	CLIC4	protein_coding
ENSG00000020633.18	27.0672	-1.81988	0.702022	-2.59234	0.00953263	0.0405948	RUNX3	protein_coding
ENSG00000188672.18	19.6416	2.43	0.80916	3.00312	0.00267231	0.0139726	RHCE	protein_coding
ENSG00000117643.14	68.3759	2.4163	0.492261	4.90858	9.17387e-07	1.15558e-05	MAN1C1	protein_coding
ENSG00000117640.18	754.136	1.04221	0.263511	3.95508	7.65091e-05	0.000640674	MTFR1L	protein_coding
ENSG00000127423.10	554.285	-2.1537	0.300543	-7.16603	7.72012e-13	2.25029e-11	AUNIP	protein_coding
ENSG00000236528.1	28.4925	-2.53365	0.710287	-3.56708	0.000360981	0.00251955	AL033528.2	antisense
ENSG00000182749.5	1605.68	1.05554	0.272293	3.8765	0.000105972	0.000854672	PAQR7	protein_coding
ENSG00000117632.23	6625.33	-2.1385	0.294075	-7.27195	3.5433e-13	1.08406e-11	STMN1	protein_coding
ENSG00000158022.6	23.7294	5.63988	1.22743	4.59486	4.33037e-06	4.8242e-05	TRIM63	protein_coding
ENSG00000176083.17	16.9938	6.15249	1.61372	3.8126	0.000137512	0.00107326	ZNF683	protein_coding
ENSG00000117676.14	2529.03	2.36322	0.288585	8.18899	2.63426e-16	1.09348e-14	RPS6KA1	protein_coding
ENSG00000175793.12	1792.03	1.9437	0.311218	6.24548	4.22504e-10	9.05289e-09	SFN	protein_coding
ENSG00000131910.5	4063.77	1.55246	0.280404	5.53652	3.08546e-08	5.02035e-07	NR0B2	protein_coding
ENSG00000158246.8	67.9812	-1.21091	0.465517	-2.60122	0.00928926	0.0397063	TENT5B	protein_coding
ENSG00000142765.18	2229.02	6.62503	0.361187	18.3424	3.79849e-75	2.58246e-72	SYTL1	protein_coding
ENSG00000237429.1	27.7913	5.83041	1.19535	4.87759	1.07388e-06	1.33333e-05	BX293535.1	antisense
ENSG00000126705.14	2264.37	2.02199	0.318739	6.34373	2.24262e-10	4.96594e-09	AHDC1	protein_coding
ENSG00000117758.14	1394.28	1.31181	0.279066	4.70072	2.59248e-06	2.99283e-05	STX12	protein_coding
ENSG00000269971.1	22.4871	2.05707	0.76777	2.67928	0.00737812	0.0326927	AL020997.2	sense_intronic
ENSG00000169403.12	280.093	3.97769	0.355436	11.191	4.51303e-29	4.33302e-27	PTAFR	protein_coding
ENSG00000130766.5	3019.41	2.3243	0.2995	7.7606	8.45307e-15	2.98648e-13	SESN2	protein_coding
ENSG00000197989.14	1004.75	-1.06005	0.253558	-4.18069	2.90625e-05	0.000268183	SNHG12	antisense
ENSG00000188060.7	895.792	-1.28404	0.271773	-4.72467	2.30484e-06	2.68791e-05	RAB42	protein_coding
ENSG00000116329.11	164.749	-2.73693	0.363919	-7.5207	5.44844e-14	1.78226e-12	OPRD1	protein_coding
ENSG00000253304.2	170.667	-1.6658	0.363502	-4.58264	4.59138e-06	5.08346e-05	TMEM200B	protein_coding
ENSG00000060656.20	6478.26	3.16198	0.302315	10.4592	1.32946e-25	1.07532e-23	PTPRU	protein_coding
ENSG00000228176.1	18.1969	7.70353	1.63121	4.72258	2.32873e-06	2.71199e-05	AC092265.1	lincRNA
ENSG00000162511.8	1543.57	7.66468	0.358404	21.3856	1.81985e-101	3.26987e-98	LAPTM5	protein_coding
ENSG00000162512.16	1901.21	-1.46931	0.26967	-5.44854	5.07836e-08	7.95431e-07	SDC3	protein_coding
ENSG00000060688.13	1973.85	-1.25857	0.249944	-5.03539	4.76874e-07	6.36718e-06	SNRNP40	protein_coding
ENSG00000121766.15	1121.59	-1.21847	0.267185	-4.5604	5.10552e-06	5.58146e-05	ZCCHC17	protein_coding
ENSG00000229167.1	295.985	2.4935	0.348562	7.15368	8.44832e-13	2.44273e-11	AC114488.1	antisense
ENSG00000121775.18	286.161	-1.54473	0.343943	-4.49125	7.08049e-06	7.54703e-05	TMEM39B	protein_coding
ENSG00000160050.14	63.6089	-1.50338	0.512213	-2.93506	0.00333478	0.016899	CCDC28B	protein_coding
ENSG00000160051.11	147.619	-1.04536	0.390569	-2.67649	0.00743968	0.0329191	IQCC	protein_coding
ENSG00000182866.17	29.4167	-2.21651	0.688646	-3.21865	0.00128794	0.00757322	LCK	protein_coding
ENSG00000116478.12	3358.35	-1.08441	0.241903	-4.48281	7.36648e-06	7.82864e-05	HDAC1	protein_coding
ENSG00000175130.7	7716.26	-1.2645	0.259903	-4.86528	1.14296e-06	1.40861e-05	MARCKSL1	protein_coding
ENSG00000134684.10	2272.39	1.00697	0.247027	4.07637	4.57435e-05	0.000404456	YARS	protein_coding
ENSG00000116514.16	2058.39	2.65461	0.247057	10.7449	6.26125e-27	5.52637e-25	RNF19B	protein_coding
ENSG00000189280.3	7.71046	4.9561	1.8189	2.72478	0.00643446	0.0291743	GJB5	protein_coding
ENSG00000020129.16	655.036	-1.10105	0.291495	-3.77725	0.00015857	0.00121797	NCDN	protein_coding
ENSG00000142686.8	96.0536	-1.63464	0.429702	-3.80412	0.000142307	0.00110724	C1orf216	protein_coding
ENSG00000092853.14	3051	-1.9693	0.277796	-7.08901	1.35076e-12	3.83503e-11	CLSPN	protein_coding
ENSG00000116885.18	60.01	2.09971	0.494819	4.24339	2.20173e-05	0.00020884	OSCP1	protein_coding
ENSG00000119535.17	336.264	1.20588	0.319927	3.76925	0.000163741	0.00125157	CSF3R	protein_coding
ENSG00000163879.11	59.7452	-1.39822	0.499996	-2.79647	0.00516645	0.0243694	DNALI1	protein_coding
ENSG00000183317.17	44.3469	2.10288	0.582866	3.60782	0.000308781	0.00220164	EPHA10	protein_coding
ENSG00000185090.14	711.025	-2.42626	0.302222	-8.02808	9.90101e-16	3.86739e-14	MANEAL	protein_coding
ENSG00000204084.13	840.509	1.24808	0.2616	4.77094	1.83365e-06	2.17061e-05	INPP5B	protein_coding
ENSG00000185668.7	189.431	6.62499	0.61234	10.8191	2.79413e-27	2.48362e-25	POU3F1	protein_coding
ENSG00000224592.5	137.767	10.6249	1.4865	7.14761	8.83031e-13	2.55025e-11	AL139158.2	lincRNA
ENSG00000265596.1	22.687	5.55515	1.24662	4.45618	8.34334e-06	8.73031e-05	MIR3659	miRNA
ENSG00000158315.11	95.3137	-2.97407	0.45525	-6.53282	6.45407e-11	1.51307e-09	RHBDL2	protein_coding
ENSG00000174574.16	6153.95	-1.26096	0.240271	-5.24808	1.53696e-07	2.24519e-06	AKIRIN1	protein_coding
ENSG00000183682.8	85.9445	4.65833	0.569032	8.18642	2.69107e-16	1.11522e-14	BMP8A	protein_coding
ENSG00000116985.12	194.132	1.45197	0.34267	4.23721	2.26317e-05	0.000214345	BMP8B	protein_coding
ENSG00000168389.17	27.7004	-1.88453	0.682187	-2.76248	0.00573639	0.0265061	MFSD2A	protein_coding
ENSG00000131238.17	5205.84	-1.25939	0.280835	-4.48443	7.31089e-06	7.77942e-05	PPT1	protein_coding
ENSG00000259943.1	206.619	-1.08319	0.331003	-3.27244	0.00106622	0.00644574	AL050341.2	antisense
ENSG00000049089.15	3099.13	1.62496	0.29842	5.44521	5.1744e-08	8.09465e-07	COL9A2	protein_coding
ENSG00000187801.15	119.746	-1.5701	0.402756	-3.89838	9.68367e-05	0.000789348	ZFP69B	protein_coding
ENSG00000260920.2	71.1837	-2.52136	0.552651	-4.56229	5.05984e-06	5.53634e-05	AL031985.3	sense_overlapping
ENSG00000179862.6	272.052	1.73345	0.321732	5.38788	7.12938e-08	1.0922e-06	CITED4	protein_coding
ENSG00000204060.7	13.2547	2.81826	1.03059	2.73462	0.0062452	0.0284856	FOXO6	protein_coding
ENSG00000044012.4	255.826	6.75147	0.553795	12.1913	3.4599e-34	4.24556e-32	GUCA2B	protein_coding
ENSG00000177181.15	116.67	-1.44695	0.392711	-3.68451	0.000229139	0.00168636	RIMKLA	protein_coding
ENSG00000171960.11	556.608	-1.08834	0.282801	-3.84844	0.000118874	0.000946672	PPIH	protein_coding
ENSG00000065978.19	21482.7	-1.14981	0.268038	-4.28971	1.78903e-05	0.000173489	YBX1	protein_coding
ENSG00000164007.10	334.353	-1.73696	0.339077	-5.12261	3.0134e-07	4.14899e-06	CLDN19	protein_coding
ENSG00000117385.15	2479.7	-1.19014	0.272379	-4.36943	1.24573e-05	0.000124498	P3H1	protein_coding
ENSG00000228192.7	96.2632	-1.1441	0.401897	-2.84674	0.00441691	0.0213956	AL512353.1	antisense
ENSG00000227533.5	194.91	-1.32188	0.345004	-3.83149	0.000127368	0.00100563	SLC2A1-AS1	lincRNA
ENSG00000283973.1	14.7331	-3.72078	1.0877	-3.42078	0.000624414	0.00406815	AC099795.1	lincRNA
ENSG00000253313.5	65.5833	3.68134	0.544034	6.76675	1.31707e-11	3.34656e-10	C1orf210	protein_coding
ENSG00000132768.14	1267.12	-1.07353	0.257717	-4.16552	3.10649e-05	0.000285404	DPH2	protein_coding
ENSG00000126106.14	183.355	-1.42243	0.364912	-3.89799	9.69929e-05	0.000790109	TMEM53	protein_coding
ENSG00000200913.1	193.791	-1.47671	0.352537	-4.18882	2.80413e-05	0.00026	SNORD46	snoRNA
ENSG00000173846.13	1949.57	3.15057	0.333904	9.43558	3.88836e-21	2.25893e-19	PLK3	protein_coding
ENSG00000222009.8	1374.37	1.84878	0.265418	6.96551	3.27212e-12	8.91769e-11	BTBD19	protein_coding
ENSG00000132773.12	677.544	-1.42276	0.271315	-5.24395	1.57176e-07	2.28805e-06	TOE1	protein_coding
ENSG00000159588.15	156.189	1.43591	0.395079	3.63448	0.000278537	0.00200475	CCDC17	protein_coding
ENSG00000117472.10	175.904	4.73329	0.441186	10.7286	7.47565e-27	6.57517e-25	TSPAN1	protein_coding
ENSG00000171357.6	45.4881	3.56297	0.622695	5.72186	1.05367e-08	1.84832e-07	LURAP1	protein_coding
ENSG00000123473.15	1276.95	-1.27235	0.291993	-4.35748	1.3157e-05	0.000130661	STIL	protein_coding
ENSG00000237424.1	127.802	-1.51485	0.380682	-3.9793	6.91192e-05	0.000585616	FOXD2-AS1	lincRNA
ENSG00000269113.4	39.5087	-3.70745	0.701042	-5.28848	1.23336e-07	1.82609e-06	TRABD2B	protein_coding
ENSG00000225028.1	10.8456	6.96112	1.75632	3.96346	7.38699e-05	0.000621678	AC096541.1	lincRNA
ENSG00000123080.11	291.278	-1.94949	0.347519	-5.60974	2.02627e-08	3.39353e-07	CDKN2C	protein_coding
ENSG00000085831.15	166.726	-1.31562	0.386355	-3.40521	0.000661124	0.00427521	TTC39A	protein_coding
ENSG00000085840.13	1207.39	-1.88862	0.249971	-7.55536	4.17695e-14	1.38799e-12	ORC1	protein_coding
ENSG00000157193.16	582.01	-1.99055	0.281231	-7.07798	1.46268e-12	4.13878e-11	LRP8	protein_coding
ENSG00000203985.11	977.236	3.95496	0.31013	12.7526	3.0154e-37	4.26137e-35	LDLRAD1	protein_coding
ENSG00000162391.12	47.2503	-4.72752	1.70343	-2.77529	0.00551522	0.0256727	FAM151A	protein_coding
ENSG00000169174.10	1244.11	-2.89238	0.29511	-9.80102	1.1145e-22	7.11553e-21	PCSK9	protein_coding
ENSG00000162407.9	1095.99	-1.06621	0.253681	-4.20297	2.63432e-05	0.000246435	PLPP3	protein_coding
ENSG00000187889.13	292.537	3.93537	0.356346	11.0437	2.35249e-28	2.19174e-26	FYB2	protein_coding
ENSG00000157131.10	123.182	-2.85937	0.410025	-6.97364	3.0884e-12	8.43525e-11	C8A	protein_coding
ENSG00000134716.11	100.011	-1.3255	0.400448	-3.31003	0.000932857	0.00575155	CYP2J2	protein_coding
ENSG00000132849.20	2402.05	1.3055	0.251424	5.19241	2.07588e-07	2.95021e-06	PATJ	protein_coding
ENSG00000162607.13	4042.66	-1.84226	0.259178	-7.10807	1.17678e-12	3.36384e-11	USP1	protein_coding
ENSG00000235545.1	182.17	-1.36182	0.348145	-3.91164	9.167e-05	0.000752239	AC103923.1	antisense
ENSG00000079739.17	1876.4	-1.4365	0.258499	-5.55707	2.74338e-08	4.50456e-07	PGM1	protein_coding
ENSG00000162437.14	642.136	-1.33619	0.280136	-4.76977	1.8444e-06	2.18128e-05	RAVER2	protein_coding
ENSG00000162433.15	3559.72	-1.09161	0.269683	-4.04774	5.17148e-05	0.00045264	AK4	protein_coding
ENSG00000116675.16	284.523	-1.16865	0.305436	-3.82618	0.000130145	0.00102146	DNAJC6	protein_coding
ENSG00000116678.19	90.7391	-1.59234	0.458255	-3.47478	0.000511271	0.00340689	LEPR	protein_coding
ENSG00000081985.11	25.8235	1.97753	0.699174	2.82838	0.00467838	0.0224418	IL12RB2	protein_coding
ENSG00000116717.13	1966.59	2.39047	0.257643	9.27825	1.72288e-20	9.65236e-19	GADD45A	protein_coding
ENSG00000223883.1	42.7389	6.46087	1.17154	5.51483	3.4912e-08	5.62235e-07	LINC01707	lincRNA
ENSG00000116761.11	92.6324	-1.43801	0.41423	-3.47151	0.000517532	0.00344588	CTH	protein_coding
ENSG00000229956.10	66.6628	1.23355	0.490782	2.51344	0.0119561	0.0488874	ZRANB2-AS2	processed_transcript
ENSG00000137968.16	1440.12	2.97917	0.259878	11.4638	2.00624e-30	2.10279e-28	SLC44A5	protein_coding
ENSG00000219201.4	307.842	-1.47412	0.332911	-4.42798	9.51178e-06	9.77804e-05	AC138392.1	processed_pseudogene
ENSG00000117114.19	402.861	3.97411	0.321369	12.3662	3.98239e-35	5.11107e-33	ADGRL2	protein_coding
ENSG00000137941.17	56.4163	-1.84567	0.512438	-3.60175	0.000316087	0.00224673	TTLL7	protein_coding
ENSG00000142875.19	510.623	-1.30763	0.30729	-4.25536	2.08709e-05	0.000198867	PRKACB	protein_coding
ENSG00000285851.1	36.4119	1.6299	0.610906	2.66801	0.00763022	0.0336498	AL359762.3	processed_transcript
ENSG00000117151.13	305.736	1.16962	0.300578	3.89125	9.97302e-05	0.000809524	CTBS	protein_coding
ENSG00000117155.16	801.902	-2.6388	0.304709	-8.66006	4.71502e-18	2.22109e-16	SSX2IP	protein_coding
ENSG00000162643.13	147.213	4.33432	0.465931	9.30249	1.37194e-20	7.7206e-19	WDR63	protein_coding
ENSG00000142871.17	2436.05	1.15341	0.301237	3.8289	0.000128719	0.00101407	CCN1	protein_coding
ENSG00000137975.8	45.9146	2.67759	0.59089	4.53145	5.858e-06	6.34071e-05	CLCA2	protein_coding
ENSG00000143013.13	1370.97	-1.29524	0.247486	-5.2336	1.66238e-07	2.40467e-06	LMO4	protein_coding
ENSG00000117228.10	30.1577	-2.76888	0.697869	-3.96762	7.25932e-05	0.000611958	GBP1	protein_coding
ENSG00000171488.15	69.3007	-1.42584	0.465262	-3.06459	0.00217967	0.0117761	LRRC8C	protein_coding
ENSG00000228175.3	35.6298	-1.93665	0.633091	-3.05904	0.00222048	0.0119709	GEMIN8P4	processed_pseudogene
ENSG00000233593.9	238.743	-1.24872	0.316112	-3.95024	7.80729e-05	0.000651817	LINC02609	processed_transcript
ENSG00000239794.3	55.8461	1.61877	0.516163	3.13616	0.00171178	0.00962443	RN7SL653P	misc_RNA
ENSG00000189195.13	149.56	1.80238	0.362241	4.97564	6.50336e-07	8.45873e-06	BTBD8	protein_coding
ENSG00000162676.12	438.445	-3.2011	0.298603	-10.7202	8.17888e-27	7.16863e-25	GFI1	protein_coding
ENSG00000223745.7	339.249	1.53161	0.315252	4.85838	1.18352e-06	1.4544e-05	CCDC18-AS1	processed_transcript
ENSG00000137936.18	373.785	-1.04347	0.302076	-3.45432	0.000551684	0.0036472	BCAR3	protein_coding
ENSG00000224093.5	1887.17	1.0992	0.251183	4.37608	1.20832e-05	0.000121338	AL109613.1	antisense
ENSG00000137962.13	3870.76	-1.39605	0.248683	-5.61376	1.97977e-08	3.32673e-07	ARHGAP29	protein_coding
ENSG00000117519.16	7865.75	-1.20749	0.245213	-4.92423	8.46932e-07	1.07382e-05	CNN3	protein_coding
ENSG00000188641.13	37.7343	-1.74422	0.613649	-2.84238	0.00447779	0.0216322	DPYD	protein_coding
ENSG00000099260.11	207.544	1.07342	0.357346	3.00386	0.00266582	0.0139444	PALMD	protein_coding
ENSG00000156876.10	941.109	-1.06524	0.278249	-3.82835	0.000129005	0.00101569	SASS6	protein_coding
ENSG00000162694.14	667.237	-1.00849	0.300521	-3.35582	0.000791305	0.00498879	EXTL2	protein_coding
ENSG00000134215.16	422.841	-1.20354	0.315209	-3.81822	0.000134419	0.00105173	VAV3	protein_coding
ENSG00000085491.17	556.467	-1.07322	0.272484	-3.93865	8.19427e-05	0.000679838	SLC25A24	protein_coding
ENSG00000162636.16	324.718	-1.05064	0.300826	-3.49251	0.000478497	0.00321748	FAM102B	protein_coding
ENSG00000116266.11	1903.55	1.00496	0.262302	3.8313	0.000127466	0.00100609	STXBP3	protein_coding
ENSG00000031698.13	4669.57	1.9346	0.256221	7.5505	4.33595e-14	1.43893e-12	SARS	protein_coding
ENSG00000162650.16	205.128	-1.152	0.365927	-3.14817	0.00164297	0.00929577	ATXN7L2	protein_coding
ENSG00000116337.16	1554.96	-1.13584	0.323462	-3.5115	0.000445581	0.00302526	AMPD2	protein_coding
ENSG00000168765.17	386.96	-1.60992	0.306442	-5.25358	1.49171e-07	2.18417e-06	GSTM4	protein_coding
ENSG00000134202.10	821.341	-1.61084	0.269156	-5.98479	2.16668e-09	4.18609e-08	GSTM3	protein_coding
ENSG00000198758.10	1218.48	-1.92476	0.312622	-6.15682	7.42202e-10	1.54554e-08	EPS8L3	protein_coding
ENSG00000116396.14	1910.8	1.42683	0.279827	5.09898	3.4148e-07	4.65075e-06	KCNC4	protein_coding
ENSG00000227963.1	72.9776	-1.87745	0.525467	-3.57292	0.000353029	0.00247504	RBM15-AS1	antisense
ENSG00000197852.11	1751.05	2.32939	0.245453	9.49015	2.30698e-21	1.36226e-19	INKA2	protein_coding
ENSG00000227811.2	81.4872	1.30526	0.448449	2.91061	0.00360725	0.0180686	INKA2-AS1	bidirectional_promoter_lncRNA
ENSG00000155366.16	3311.31	1.11923	0.288498	3.8795	0.00010467	0.000846345	RHOC	protein_coding
ENSG00000118655.6	555.184	-1.10855	0.27944	-3.96705	7.27671e-05	0.000613013	DCLRE1B	protein_coding
ENSG00000116774.12	125.095	-1.85747	0.442434	-4.19829	2.68936e-05	0.00025093	OLFML3	protein_coding
ENSG00000173218.15	942.26	-1.15038	0.260911	-4.40908	1.03813e-05	0.000105811	VANGL1	protein_coding
ENSG00000163393.13	125.634	-1.03536	0.384955	-2.68957	0.00715441	0.0318304	SLC22A15	protein_coding
ENSG00000092607.15	168.543	5.26262	0.478437	10.9996	3.83787e-28	3.54933e-26	TBX15	protein_coding
ENSG00000227712.1	18.4614	3.31175	0.923639	3.58555	0.000336372	0.00237081	AL359915.1	lincRNA
ENSG00000232650.5	53.0353	3.91105	0.619836	6.30983	2.79351e-10	6.10519e-09	LINC01780	lincRNA
ENSG00000226443.3	32.0506	4.69805	0.879828	5.33973	9.30828e-08	1.40126e-06	GAPDHP32	processed_pseudogene
ENSG00000239873.2	37.2913	5.70951	1.00972	5.65454	1.56269e-08	2.67593e-07	GAPDHP27	processed_pseudogene
ENSG00000240244.3	113.374	7.88983	1.08932	7.2429	4.39185e-13	1.32785e-11	GAPDHP33	processed_pseudogene
ENSG00000260941.1	170.803	9.48932	1.46003	6.49938	8.06497e-11	1.87499e-09	LINC00622	sense_overlapping
ENSG00000198857.3	354.101	8.9528	0.882828	10.141	3.63186e-24	2.6481e-22	HSD3BP5	transcribed_unprocessed_pseudogene
ENSG00000092621.12	1304.42	-2.89508	0.304146	-9.51871	1.75338e-21	1.04024e-19	PHGDH	protein_coding
ENSG00000223804.5	9.26961	-4.11398	1.45684	-2.8239	0.00474427	0.0227102	AC244669.1	transcribed_unprocessed_pseudogene
ENSG00000226067.6	29.4304	-3.75642	0.819933	-4.58137	4.61937e-06	5.1122e-05	LINC00623	lincRNA
ENSG00000188610.12	360.173	1.0205	0.294594	3.46407	0.00053206	0.00353139	FAM72B	protein_coding
ENSG00000272419.6	157.329	-2.07519	0.357406	-5.80626	6.38846e-09	1.16198e-07	LINC01145	transcribed_unprocessed_pseudogene
ENSG00000281571.2	82.2283	-1.63272	0.479739	-3.40334	0.000665671	0.0043013	AC241585.2	TEC
ENSG00000271601.4	631.696	-1.19853	0.270655	-4.42825	9.50003e-06	9.76996e-05	LIX1L	protein_coding
ENSG00000131781.13	935.875	-1.65253	0.271949	-6.07661	1.22749e-09	2.46626e-08	FMO5	protein_coding
ENSG00000226015.2	121.737	-1.23081	0.393173	-3.13046	0.00174533	0.0097716	CCT8P1	processed_pseudogene
ENSG00000116128.11	521.218	-1.59223	0.292539	-5.44279	5.24517e-08	8.20026e-07	BCL9	protein_coding
ENSG00000274020.3	178.837	-1.42676	0.36799	-3.87716	0.000105682	0.000853427	LINC01138	processed_transcript
ENSG00000280649.2	151.664	-1.12599	0.396448	-2.84019	0.0045086	0.0217643	AC245100.8	TEC
ENSG00000274265.4	42.9124	-2.62184	0.603344	-4.34551	1.3895e-05	0.000137407	AC245297.3	lincRNA
ENSG00000183598.3	653.346	-1.35311	0.316053	-4.28128	1.85822e-05	0.0001793	HIST2H3D	protein_coding
ENSG00000014914.21	40.1911	-1.54804	0.579729	-2.67028	0.00757876	0.0334462	MTMR11	protein_coding
ENSG00000285184.2	201.047	-1.40099	0.334835	-4.18412	2.86269e-05	0.000264747	AC244033.2	bidirectional_promoter_lncRNA
ENSG00000023902.14	388.557	-1.60204	0.308511	-5.19281	2.07139e-07	2.94549e-06	PLEKHO1	protein_coding
ENSG00000143401.15	2107.21	-1.6277	0.247961	-6.56433	5.22691e-11	1.24392e-09	ANP32E	protein_coding
ENSG00000118298.12	36.8717	-2.14605	0.617372	-3.47611	0.000508751	0.0033937	CA14	protein_coding
ENSG00000143374.17	1206.63	1.34926	0.286932	4.70238	2.57143e-06	2.97262e-05	TARS2	protein_coding
ENSG00000143369.15	103.803	2.40557	0.416802	5.7715	7.8571e-09	1.40548e-07	ECM1	protein_coding
ENSG00000228126.1	57.6309	1.70436	0.492119	3.4633	0.000533601	0.00354068	FALEC	lincRNA
ENSG00000143382.14	1958.78	2.64647	0.338904	7.80891	5.76824e-15	2.08777e-13	ADAMTSL4	protein_coding
ENSG00000163131.11	60.6143	-1.32801	0.503295	-2.63862	0.00832432	0.0362281	CTSS	protein_coding
ENSG00000143412.10	370.946	1.24465	0.322694	3.85706	0.000114761	0.000917903	ANXA9	protein_coding
ENSG00000237976.1	90.9551	-2.97275	0.475064	-6.25758	3.91002e-10	8.42093e-09	AL391069.2	antisense
ENSG00000143416.21	570.945	-1.49028	0.313691	-4.75081	2.02607e-06	2.38716e-05	SELENBP1	protein_coding
ENSG00000143375.15	368.936	-1.61419	0.288865	-5.58804	2.29647e-08	3.81808e-07	CGN	protein_coding
ENSG00000159409.14	139.493	5.07978	0.50451	10.0687	7.59496e-24	5.35064e-22	CELF3	protein_coding
ENSG00000178796.12	52.0731	5.76534	0.871579	6.61482	3.71992e-11	8.96309e-10	RIIAD1	protein_coding
ENSG00000143450.16	46.9424	-1.42401	0.531938	-2.67703	0.00742784	0.0328841	OAZ3	protein_coding
ENSG00000163191.6	1399.76	1.59334	0.271679	5.86479	4.49702e-09	8.37945e-08	S100A11	protein_coding
ENSG00000237975.6	197.955	5.19976	0.449884	11.558	6.72511e-31	7.10799e-29	FLG-AS1	antisense
ENSG00000236427.1	26.1499	6.77652	1.56875	4.31969	1.56246e-05	0.000153171	AL589986.2	lincRNA
ENSG00000240386.3	359.054	12.0068	1.47287	8.15201	3.57922e-16	1.46161e-14	LCE1F	protein_coding
ENSG00000186226.9	151.886	9.32108	1.45648	6.39972	1.55659e-10	3.49606e-09	LCE1E	protein_coding
ENSG00000172155.9	8.90596	6.67575	1.79973	3.7093	0.000207831	0.00154492	LCE1D	protein_coding
ENSG00000197084.5	262.465	11.5547	1.4758	7.82949	4.89856e-15	1.78326e-13	LCE1C	protein_coding
ENSG00000196734.8	250.575	11.4879	1.47672	7.77936	7.28905e-15	2.61564e-13	LCE1B	protein_coding
ENSG00000197956.10	1564.97	2.16386	0.303355	7.1331	9.81359e-13	2.82127e-11	S100A6	protein_coding
ENSG00000231827.3	12.7348	3.66098	1.14295	3.20309	0.0013596	0.00792603	AL513523.2	transcribed_unprocessed_pseudogene
ENSG00000223599.1	84.7186	1.08876	0.41904	2.59823	0.0093707	0.0400136	AL513523.1	processed_pseudogene
ENSG00000143570.18	103.359	-1.19719	0.422816	-2.83147	0.00463342	0.0222728	SLC39A1	protein_coding
ENSG00000163344.6	333.38	1.36778	0.324581	4.21398	2.5091e-05	0.000236037	PMVK	protein_coding
ENSG00000270361.1	15.862	2.50598	0.898488	2.7891	0.00528541	0.0248142	AL451085.1	lincRNA
ENSG00000163346.17	1037.96	1.26646	0.289809	4.36998	1.24258e-05	0.000124283	PBXIP1	protein_coding
ENSG00000160685.13	1013.76	1.36859	0.289152	4.73312	2.2109e-06	2.58556e-05	ZBTB7B	protein_coding
ENSG00000163354.15	27.5911	1.67032	0.666013	2.50794	0.0121437	0.0494938	DCST2	protein_coding
ENSG00000169242.12	1164.49	-1.09831	0.313244	-3.50626	0.000454452	0.00307719	EFNA1	protein_coding
ENSG00000179085.7	369.616	-1.01704	0.377918	-2.69116	0.00712044	0.031741	DPM3	protein_coding
ENSG00000163462.18	20.3844	-3.34962	0.898974	-3.72605	0.000194502	0.00145833	TRIM46	protein_coding
ENSG00000231064.7	18.1181	-2.59506	0.861743	-3.0114	0.00260043	0.0136506	AC234582.1	antisense
ENSG00000236675.1	331.316	-2.47215	0.880501	-2.80766	0.00499029	0.0236672	MTX1P1	unprocessed_pseudogene
ENSG00000143630.10	251.562	-1.25712	0.380459	-3.30422	0.000952426	0.00585634	HCN3	protein_coding
ENSG00000143627.19	170.799	-2.24034	0.400661	-5.59162	2.24962e-08	3.74426e-07	PKLR	protein_coding
ENSG00000160752.14	3336.97	-1.60354	0.28446	-5.63712	1.72914e-08	2.94588e-07	FDPS	protein_coding
ENSG00000225855.6	167.712	1.17534	0.365032	3.21983	0.00128267	0.00754749	RUSC1-AS1	antisense
ENSG00000254726.3	1330.16	-1.27291	0.327587	-3.88571	0.000102031	0.00082633	MEX3A	protein_coding
ENSG00000160789.20	9414.86	1.20778	0.291684	4.14072	3.46216e-05	0.000315889	LMNA	protein_coding
ENSG00000237390.1	46.5161	1.86034	0.560866	3.3169	0.000910226	0.00563681	AL139130.1	lincRNA
ENSG00000132688.11	10055.1	-1.41452	0.239982	-5.89429	3.76294e-09	7.07449e-08	NES	protein_coding
ENSG00000027869.11	610.075	3.00269	0.354164	8.47827	2.28564e-17	1.03223e-15	SH2D2A	protein_coding
ENSG00000187800.13	416.326	5.86849	0.401674	14.6101	2.42183e-48	6.03179e-46	PEAR1	protein_coding
ENSG00000163564.14	28.4307	4.26	0.879892	4.8415	1.28861e-06	1.56745e-05	PYHIN1	protein_coding
ENSG00000162729.14	649.051	-1.61717	0.308504	-5.24198	1.58866e-07	2.31132e-06	IGSF8	protein_coding
ENSG00000018625.14	75.1105	-3.68568	0.529659	-6.9586	3.43672e-12	9.35614e-11	ATP1A2	protein_coding
ENSG00000228606.2	28.7513	-1.72923	0.676442	-2.55637	0.0105771	0.0442561	AL139011.1	antisense
ENSG00000162738.6	149.145	-1.8795	0.358959	-5.23597	1.64122e-07	2.37949e-06	VANGL2	protein_coding
ENSG00000213080.3	32.9598	-1.96536	0.633456	-3.1026	0.00191827	0.010577	AL354714.2	processed_pseudogene
ENSG00000158764.7	10.9066	4.46327	1.38933	3.21253	0.00131573	0.00770776	ITLN2	protein_coding
ENSG00000158769.18	1553.71	1.50706	0.263054	5.7291	1.00963e-08	1.77603e-07	F11R	protein_coding
ENSG00000186517.14	72.0214	5.81472	1.61462	3.60129	0.000316647	0.00225007	ARHGAP30	protein_coding
ENSG00000143217.9	2912.07	8.67496	0.366399	23.6762	6.33726e-124	2.6569e-120	NECTIN4	protein_coding
ENSG00000228917.1	7.77542	5.00471	1.79922	2.78161	0.00540903	0.0253049	AL591806.1	antisense
ENSG00000158859.10	366.952	-2.1523	0.334823	-6.42817	1.29153e-10	2.92426e-09	ADAMTS4	protein_coding
ENSG00000158869.11	24.0409	-2.17319	0.80947	-2.6847	0.00725942	0.032252	FCER1G	protein_coding
ENSG00000158874.11	41879.5	-1.84913	0.282813	-6.53835	6.22001e-11	1.46365e-09	APOA2	protein_coding
ENSG00000158887.16	370.616	-1.68047	0.316656	-5.30693	1.11485e-07	1.66335e-06	MPZ	protein_coding
ENSG00000283317.1	4.33431	5.62824	2.14797	2.62025	0.00878643	0.0379699	AL831711.1	lincRNA
ENSG00000132185.16	160.805	10.8484	1.48566	7.30205	2.83406e-13	8.83405e-12	FCRLA	protein_coding
ENSG00000198929.13	759.076	1.3031	0.282144	4.61858	3.86373e-06	4.33506e-05	NOS1AP	protein_coding
ENSG00000132196.14	895.631	1.21951	0.269311	4.52826	5.94714e-06	6.42613e-05	HSD17B7	protein_coding
ENSG00000143149.12	1349.97	-1.20197	0.258697	-4.64625	3.38029e-06	3.83024e-05	ALDH9A1	protein_coding
ENSG00000143179.16	1390.57	-1.03457	0.25835	-4.00452	6.21424e-05	0.000533695	UCK2	protein_coding
ENSG00000232223.1	16.9588	6.1498	1.61453	3.80903	0.000139511	0.00108717	CNN2P10	processed_pseudogene
ENSG00000143194.13	18.8854	3.88962	0.971038	4.00563	6.18533e-05	0.000531575	MAEL	protein_coding
ENSG00000143158.11	994.224	-1.7205	0.256206	-6.71528	1.87706e-11	4.67962e-10	MPC2	protein_coding
ENSG00000143147.14	404.785	-2.63595	0.297231	-8.86836	7.42335e-19	3.6904e-17	GPR161	protein_coding
ENSG00000228697.3	20.9217	-3.15508	0.877464	-3.59568	0.000323542	0.00229066	AL023755.1	lincRNA
ENSG00000117479.14	1879.05	-1.28038	0.24991	-5.12335	3.00153e-07	4.13491e-06	SLC19A2	protein_coding
ENSG00000000460.17	1422.31	-1.00385	0.268086	-3.74452	0.000180741	0.00136328	C1orf112	protein_coding
ENSG00000117586.11	807.584	2.31918	0.295038	7.86061	3.82262e-15	1.40377e-13	TNFSF4	protein_coding
ENSG00000117601.13	548.837	-1.93001	0.287368	-6.71616	1.86577e-11	4.6561e-10	SERPINC1	protein_coding
ENSG00000116161.17	2341.61	-1.25634	0.25624	-4.903	9.43843e-07	1.18653e-05	CACYBP	protein_coding
ENSG00000213057.5	127.433	-1.79049	0.381428	-4.69416	2.67701e-06	3.07911e-05	C1orf220	lincRNA
ENSG00000273062.1	23.8158	-2.10426	0.802289	-2.62282	0.00872044	0.0377171	AL449106.1	antisense
ENSG00000116191.17	1660.36	-1.29251	0.265972	-4.85958	1.17637e-06	1.44631e-05	RALGPS2	protein_coding
ENSG00000116194.13	261.702	-3.48347	0.442183	-7.87789	3.32946e-15	1.22985e-13	ANGPTL1	protein_coding
ENSG00000057252.13	2429.81	-1.03543	0.283538	-3.65183	0.000260376	0.00188699	SOAT1	protein_coding
ENSG00000230124.8	1271.76	1.80993	0.275261	6.57532	4.85471e-11	1.15644e-09	ACBD6	protein_coding
ENSG00000243155.1	60.9481	1.30211	0.506774	2.5694	0.0101875	0.04294	AL162431.2	antisense
ENSG00000135823.14	2836.16	1.20693	0.2429	4.9688	6.73669e-07	8.71715e-06	STX6	protein_coding
ENSG00000153029.14	3217.93	4.65917	0.248133	18.7769	1.16634e-78	8.62917e-76	MR1	protein_coding
ENSG00000162783.10	597.054	1.14192	0.291401	3.91872	8.90203e-05	0.000732518	IER5	protein_coding
ENSG00000116701.14	44.172	-1.59156	0.562216	-2.83087	0.00464222	0.0222981	NCF2	protein_coding
ENSG00000143344.15	2229.51	2.24172	0.244848	9.15559	5.40637e-20	2.91839e-18	RGL1	protein_coding
ENSG00000198756.12	1213.22	-2.38012	0.266584	-8.92821	4.32975e-19	2.19144e-17	COLGALT2	protein_coding
ENSG00000198860.12	662.886	-1.30724	0.30583	-4.27439	1.9166e-05	0.000184156	TSEN15	protein_coding
ENSG00000121481.11	1098.47	-1.15152	0.268376	-4.29068	1.78125e-05	0.000172934	RNF2	protein_coding
ENSG00000273004.1	62.6904	-1.45982	0.529627	-2.75631	0.00584579	0.0269373	AL078644.2	lincRNA
ENSG00000230426.3	315.534	4.01387	0.345253	11.6259	3.04346e-31	3.2578e-29	ERVMER61-1	lincRNA
ENSG00000274702.1	11.5055	7.04454	1.72619	4.08099	4.48452e-05	0.000397352	AL357559.1	processed_pseudogene
ENSG00000285280.1	118.421	-1.54555	0.399028	-3.87329	0.000107374	0.000865097	AL390957.1	lincRNA
ENSG00000116833.14	49.0383	-2.19079	0.549436	-3.98735	6.68155e-05	0.000568587	NR5A2	protein_coding
ENSG00000229191.1	4.87107	-5.66992	2.04163	-2.77715	0.00548375	0.0255736	AL358473.1	antisense
ENSG00000174307.6	1537.73	8.76959	0.464572	18.8767	1.77235e-79	1.39323e-76	PHLDA3	protein_coding
ENSG00000143862.8	1137.3	1.93607	0.317746	6.09313	1.10726e-09	2.2426e-08	ARL8A	protein_coding
ENSG00000243323.7	20.9938	2.53214	0.80288	3.15382	0.00161149	0.00914647	PTPRVP	transcribed_unitary_pseudogene
ENSG00000077152.10	642.61	-1.27855	0.309195	-4.13511	3.54782e-05	0.000322418	UBE2T	protein_coding
ENSG00000214796.8	249.466	-1.06455	0.344396	-3.09106	0.00199442	0.0109254	AC098934.1	transcribed_unprocessed_pseudogene
ENSG00000234996.4	81.2161	-1.81039	0.478139	-3.78632	0.000152896	0.00117906	AC098934.2	transcribed_processed_pseudogene
ENSG00000117153.16	1693.92	1.3994	0.252115	5.55064	2.8463e-08	4.66137e-07	KLHL12	protein_coding
ENSG00000199471.1	13.3814	3.29041	1.14335	2.87787	0.00400372	0.0197245	RF00019	misc_RNA
ENSG00000233791.5	16.2249	4.43544	1.13982	3.89134	9.96908e-05	0.000809465	LINC01136	lincRNA
ENSG00000159388.6	4125.55	4.72037	0.243883	19.3551	1.84736e-83	1.60242e-80	BTG2	protein_coding
ENSG00000058668.14	920.944	-1.75516	0.255551	-6.86813	6.5049e-12	1.70983e-10	ATP2B4	protein_coding
ENSG00000143842.15	752.065	-1.35423	0.326121	-4.15253	3.28825e-05	0.000301333	SOX13	protein_coding
ENSG00000219133.2	77.4812	1.29684	0.43963	2.94985	0.00317924	0.0161923	AL592114.1	processed_pseudogene
ENSG00000198625.13	2431.99	1.21588	0.263807	4.609	4.0462e-06	4.52566e-05	MDM4	protein_coding
ENSG00000133069.17	96.573	-1.32336	0.424287	-3.11901	0.0018146	0.0100988	TMCC2	protein_coding
ENSG00000163545.8	739.996	1.33317	0.275218	4.84404	1.27224e-06	1.55054e-05	NUAK2	protein_coding
ENSG00000174514.13	81.9504	3.26874	0.490308	6.6667	2.61624e-11	6.42063e-10	MFSD4A	protein_coding
ENSG00000196188.11	109.464	-2.32361	0.456243	-5.09292	3.5259e-07	4.79427e-06	CTSE	protein_coding
ENSG00000285417.1	258.795	1.79146	0.30894	5.79873	6.68185e-09	1.21184e-07	BX571818.1	transcribed_unitary_pseudogene
ENSG00000263528.8	515.418	-2.11509	0.300285	-7.04362	1.87307e-12	5.21784e-11	IKBKE	protein_coding
ENSG00000266094.7	109.285	1.76061	0.392952	4.48047	7.44776e-06	7.89501e-05	RASSF5	protein_coding
ENSG00000234981.1	6.34396	6.18087	1.92218	3.21556	0.00130192	0.00763935	AC244034.1	processed_pseudogene
ENSG00000279946.1	20.5015	2.54269	0.833876	3.04924	0.00229419	0.0123076	AC244034.3	TEC
ENSG00000234219.1	92.6071	1.28045	0.429744	2.97957	0.00288656	0.0149222	CDCA4P4	unprocessed_pseudogene
ENSG00000076356.7	1627.71	1.09452	0.290497	3.76773	0.000164737	0.00125804	PLXNA2	protein_coding
ENSG00000008118.10	58.7501	9.39454	1.51727	6.19176	5.94968e-10	1.25033e-08	CAMK1G	protein_coding
ENSG00000196878.15	40.0934	2.99265	0.619806	4.82837	1.37654e-06	1.66316e-05	LAMB3	protein_coding
ENSG00000054392.13	1208.05	4.29116	0.265178	16.1822	6.73729e-59	2.22995e-56	HHAT	protein_coding
ENSG00000279333.1	104.393	4.25363	0.4856	8.75953	1.96069e-18	9.50309e-17	AC096636.1	TEC
ENSG00000226986.4	93.918	-1.50647	0.442685	-3.40302	0.000666451	0.00430329	AC092017.1	processed_pseudogene
ENSG00000170385.10	4577.11	2.11034	0.295702	7.1367	9.56008e-13	2.75153e-11	SLC30A1	protein_coding
ENSG00000228792.2	16.0849	4.42348	1.14674	3.85744	0.000114581	0.00091676	AL356310.1	lincRNA
ENSG00000227764.1	9.7201	5.3055	1.7364	3.05547	0.0022471	0.0120989	LINC01693	lincRNA
ENSG00000117650.13	1384.84	-1.22757	0.267503	-4.589	4.45371e-06	4.94627e-05	NEK2	protein_coding
ENSG00000143493.13	1022.48	-1.27822	0.271861	-4.70173	2.57969e-06	2.98053e-05	INTS7	protein_coding
ENSG00000143476.18	2301.01	-2.11559	0.260911	-8.10847	5.12605e-16	2.05001e-14	DTL	protein_coding
ENSG00000143494.15	109.435	-1.22624	0.405775	-3.02196	0.0025114	0.013258	VASH2	protein_coding
ENSG00000225233.1	26.3522	-5.04688	1.05031	-4.80515	1.54633e-06	1.8565e-05	AL592402.1	lincRNA
ENSG00000136636.13	1756.77	-1.19643	0.261214	-4.58026	4.64408e-06	5.13728e-05	KCTD3	protein_coding
ENSG00000196660.10	121.998	-1.82645	0.387991	-4.70745	2.50841e-06	2.90779e-05	SLC30A10	protein_coding
ENSG00000162817.7	2063.77	1.76586	0.255243	6.91836	4.56894e-12	1.2345e-10	C1orf115	protein_coding
ENSG00000117791.16	279.012	1.27042	0.320238	3.96713	7.27431e-05	0.000613013	MARC2	protein_coding
ENSG00000186205.13	455.065	-1.40705	0.29625	-4.74954	2.03876e-06	2.40098e-05	MARC1	protein_coding
ENSG00000234754.1	28.9033	-2.59345	0.700346	-3.7031	0.000212979	0.00157898	AL445470.1	lincRNA
ENSG00000143507.18	746.809	-1.65529	0.301075	-5.49793	3.8427e-08	6.16081e-07	DUSP10	protein_coding
ENSG00000186063.13	1500.44	-1.55307	0.302208	-5.13908	2.76084e-07	3.8306e-06	AIDA	protein_coding
ENSG00000162909.18	587.005	2.37431	0.347644	6.82973	8.50751e-12	2.20306e-10	CAPN2	protein_coding
ENSG00000143753.13	661.85	-1.22591	0.26295	-4.66215	3.12922e-06	3.56004e-05	DEGS1	protein_coding
ENSG00000237101.1	11.4874	5.57606	1.72858	3.2258	0.00125619	0.00742296	AC092809.4	antisense
ENSG00000143815.15	4620.74	-1.02163	0.236298	-4.32349	1.53577e-05	0.000150848	LBR	protein_coding
ENSG00000234476.2	31.3752	3.78238	0.754042	5.01613	5.27215e-07	6.97271e-06	AC092811.1	lincRNA
ENSG00000282418.1	23.2537	5.02018	1.08842	4.61234	3.98158e-06	4.45934e-05	AC092811.2	lincRNA
ENSG00000203685.10	30.2998	1.79393	0.656123	2.73414	0.00625435	0.0285221	STUM	protein_coding
ENSG00000143772.9	26.1908	2.29927	0.717769	3.20335	0.00135838	0.00792332	ITPKB	protein_coding
ENSG00000163050.17	2976.99	1.19725	0.27417	4.3668	1.26077e-05	0.000125752	COQ8A	protein_coding
ENSG00000143816.8	129.186	4.58185	0.495045	9.25542	2.13399e-20	1.18239e-18	WNT9A	protein_coding
ENSG00000154429.11	1464.82	-1.41845	0.260066	-5.45419	4.91977e-08	7.72514e-07	CCSAP	protein_coding
ENSG00000135744.8	12055.8	-1.6725	0.289597	-5.77528	7.68264e-09	1.37549e-07	AGT	protein_coding
ENSG00000135773.13	96.89	2.65164	0.428051	6.19468	5.84034e-10	1.2294e-08	CAPN9	protein_coding
ENSG00000182118.8	201.401	-1.4304	0.3329	-4.29678	1.73299e-05	0.00016864	FAM89A	protein_coding
ENSG00000116991.10	105.606	1.4779	0.399196	3.70218	0.000213756	0.00158334	SIPA1L2	protein_coding
ENSG00000135778.12	2884.52	2.51469	0.246787	10.1897	2.20434e-24	1.64541e-22	NTPCR	protein_coding
ENSG00000236358.1	22.7946	2.10304	0.747036	2.81518	0.00487505	0.0232169	AL355472.2	antisense
ENSG00000227630.3	96.8127	-1.29222	0.406244	-3.1809	0.0014682	0.00845333	LINC01132	lincRNA
ENSG00000207181.1	76.666	-1.21181	0.442311	-2.73971	0.00614926	0.0281449	SNORA14B	snoRNA
ENSG00000168243.11	782.851	-3.1423	0.297015	-10.5796	3.70519e-26	3.13819e-24	GNG4	protein_coding
ENSG00000116962.15	12494.5	-2.21671	0.249434	-8.88695	6.28066e-19	3.14096e-17	NID1	protein_coding
ENSG00000077585.14	126.205	-2.23979	0.402224	-5.56852	2.56907e-08	4.24326e-07	GPR137B	protein_coding
ENSG00000203668.2	2220.22	-1.75948	0.263752	-6.67095	2.5415e-11	6.24331e-10	CHML	protein_coding
ENSG00000174371.17	1125.41	-2.29685	0.267946	-8.57206	1.01653e-17	4.66621e-16	EXO1	protein_coding
ENSG00000180287.16	76.3335	5.26803	0.685232	7.68795	1.49506e-14	5.17308e-13	PLD5	protein_coding
ENSG00000213690.3	9.0927	5.23534	1.75293	2.98662	0.00282082	0.0146213	AL360271.1	processed_pseudogene
ENSG00000253326.2	13.9303	4.26377	1.21738	3.50241	0.00046107	0.00311948	AL606534.4	processed_pseudogene
ENSG00000214837.8	49.8733	1.70869	0.525596	3.25096	0.00115016	0.0068723	LINC01347	transcribed_unprocessed_pseudogene
ENSG00000117020.17	98.8807	-1.79383	0.419477	-4.27635	1.89983e-05	0.000182724	AKT3	protein_coding
ENSG00000162849.16	133.741	2.1134	0.402205	5.25452	1.4841e-07	2.17555e-06	KIF26B	protein_coding
ENSG00000197472.15	418.917	-1.44185	0.286639	-5.0302	4.89959e-07	6.51767e-06	ZNF695	protein_coding
ENSG00000184731.6	248.399	1.43344	0.331039	4.33012	1.49031e-05	0.00014667	FAM110C	protein_coding
ENSG00000130508.11	568.589	6.69881	0.410274	16.3277	6.27367e-60	2.28716e-57	PXDN	protein_coding
ENSG00000224885.1	96.4937	1.35306	0.45305	2.98656	0.00282138	0.0146213	EIPR1-IT1	sense_intronic
ENSG00000236008.2	113.701	2.17846	0.393279	5.53922	3.03826e-08	4.94747e-07	LINC01814	lincRNA
ENSG00000115738.10	12705.7	1.36439	0.231427	5.89556	3.73416e-09	7.02563e-08	ID2	protein_coding
ENSG00000171848.15	11322.2	-1.34533	0.235886	-5.7033	1.17512e-08	2.05421e-07	RRM2	protein_coding
ENSG00000285872.1	74.0787	-2.26596	0.473674	-4.7838	1.72014e-06	2.04387e-05	AC007240.1	bidirectional_promoter_lncRNA
ENSG00000115758.13	9326.96	-1.41044	0.241112	-5.84973	4.92368e-09	9.13387e-08	ODC1	protein_coding
ENSG00000257135.6	141.322	-1.29774	0.36406	-3.56464	0.000364359	0.00253961	ODC1-DT	lincRNA
ENSG00000150873.11	76.1782	-1.37003	0.450762	-3.03937	0.00237077	0.0126542	C2orf50	protein_coding
ENSG00000230952.1	1528.8	1.79123	0.256279	6.98936	2.76143e-12	7.58136e-11	AC099344.1	lincRNA
ENSG00000196208.14	3284.64	-1.05153	0.274787	-3.82672	0.00012986	0.0010202	GREB1	protein_coding
ENSG00000239899.3	33.1136	-1.66159	0.624111	-2.66233	0.0077601	0.0340947	RN7SL674P	misc_RNA
ENSG00000265172.1	19.2976	5.28778	1.25606	4.20983	2.55566e-05	0.000239701	MIR4262	miRNA
ENSG00000071575.11	84.3667	-2.41598	0.463208	-5.21575	1.83073e-07	2.63154e-06	TRIB2	protein_coding
ENSG00000229370.1	28.0303	2.68436	0.704339	3.81118	0.000138304	0.0010791	AC073062.1	lincRNA
ENSG00000227718.1	55.8814	2.11299	0.524889	4.02559	5.68319e-05	0.000492628	AC016730.1	lincRNA
ENSG00000162981.14	210.094	3.43745	0.364813	9.42249	4.40499e-21	2.55317e-19	FAM84A	protein_coding
ENSG00000233718.7	5.63537	-5.88508	1.95837	-3.0051	0.00265497	0.0138964	MYCNOS	antisense
ENSG00000134323.12	238.567	-4.18289	0.370522	-11.2892	1.4839e-29	1.46382e-27	MYCN	protein_coding
ENSG00000236289.3	30.202	-3.4215	0.747846	-4.57514	4.75908e-06	5.23915e-05	GACAT3	lincRNA
ENSG00000197872.11	63.8894	4.27792	0.649812	6.58332	4.60061e-11	1.09904e-09	FAM49A	protein_coding
ENSG00000132031.13	3032.46	1.13914	0.23855	4.77527	1.79463e-06	2.12742e-05	MATN3	protein_coding
ENSG00000115884.11	11832.4	1.84577	0.285192	6.47201	9.67069e-11	2.22568e-09	SDC1	protein_coding
ENSG00000118960.13	2651.47	1.17468	0.277649	4.23083	2.32827e-05	0.000220014	HS1BP3	protein_coding
ENSG00000143869.7	1510.09	-1.24629	0.268648	-4.63912	3.49897e-06	3.95403e-05	GDF7	protein_coding
ENSG00000218819.4	264.62	-1.33718	0.312258	-4.2823	1.84968e-05	0.00017875	TDRD15	protein_coding
ENSG00000234946.1	34.2793	1.78194	0.631686	2.82092	0.00478862	0.0228833	SDHCP3	processed_pseudogene
ENSG00000115129.14	16537.1	5.2853	0.258883	20.4158	1.2105e-92	1.218e-89	TP53I3	protein_coding
ENSG00000184924.5	743.707	-1.09548	0.311629	-3.51532	0.00043922	0.00298933	PTRHD1	protein_coding
ENSG00000138092.11	2685.86	-1.37926	0.256742	-5.37218	7.77889e-08	1.18449e-06	CENPO	protein_coding
ENSG00000138031.14	134.977	-1.27502	0.374175	-3.40756	0.000655458	0.00424403	ADCY3	protein_coding
ENSG00000084731.15	791.511	-1.20806	0.295799	-4.08404	4.42586e-05	0.000392431	KIF3C	protein_coding
ENSG00000157833.13	485.019	1.01679	0.338968	2.99965	0.00270288	0.0141177	GAREM2	protein_coding
ENSG00000173567.15	83.7068	-1.29207	0.44944	-2.87484	0.00404237	0.0198761	ADGRF3	protein_coding
ENSG00000115155.17	219.194	3.02886	0.345496	8.76671	1.83968e-18	8.93381e-17	OTOF	protein_coding
ENSG00000084764.11	199.734	2.63491	0.364694	7.225	5.01108e-13	1.49885e-11	MAPRE3	protein_coding
ENSG00000231636.1	10.515	5.44754	1.72327	3.16116	0.00157141	0.00896546	AGBL5-AS1	antisense
ENSG00000143994.14	32.7754	1.59113	0.628889	2.53006	0.0114043	0.0471059	ABHD1	protein_coding
ENSG00000115194.10	910.945	-3.05124	0.308702	-9.88409	4.8798e-23	3.21339e-21	SLC30A3	protein_coding
ENSG00000163794.6	38.43	1.66675	0.620921	2.68431	0.00726792	0.0322727	UCN	protein_coding
ENSG00000084734.9	249.668	-1.81989	0.340089	-5.35122	8.7361e-08	1.31907e-06	GCKR	protein_coding
ENSG00000205334.2	74.1502	5.58045	1.78452	3.12715	0.0017651	0.00986031	LINC01460	lincRNA
ENSG00000171174.15	287.027	1.29977	0.301767	4.30718	1.65351e-05	0.000161343	RBKS	protein_coding
ENSG00000158019.20	680.213	1.45201	0.265247	5.47419	4.3952e-08	6.97108e-07	BABAM2	protein_coding
ENSG00000225991.1	38.8732	2.39763	0.601826	3.98392	6.77877e-05	0.00057647	RPL23AP34	processed_pseudogene
ENSG00000075426.12	2380.94	1.88466	0.292775	6.43723	1.2167e-10	2.76477e-09	FOSL2	protein_coding
ENSG00000270640.1	30.543	3.30425	0.725466	4.55466	5.247e-06	5.72866e-05	AC104695.4	sense_intronic
ENSG00000163803.13	305.706	1.23164	0.305307	4.0341	5.48118e-05	0.000476925	PLB1	protein_coding
ENSG00000265145.1	57.057	1.63561	0.495338	3.30202	0.000959926	0.0058895	SNORD53	snoRNA
ENSG00000172954.13	2207.43	-1.06635	0.254305	-4.19318	2.75067e-05	0.000255703	LCLAT1	protein_coding
ENSG00000272754.1	19.3641	2.40584	0.812976	2.9593	0.00308341	0.0157777	AL133245.1	lincRNA
ENSG00000276334.1	144.475	1.07146	0.362678	2.95429	0.0031339	0.015997	AL133243.2	sense_intronic
ENSG00000279544.1	130.651	1.48257	0.390092	3.80056	0.000144369	0.00112156	AL133243.4	TEC
ENSG00000260025.1	42.1317	1.77953	0.559536	3.18037	0.00147085	0.00846576	CRIM1-DT	lincRNA
ENSG00000150938.10	6791.19	1.15713	0.24189	4.78371	1.7209e-06	2.04387e-05	CRIM1	protein_coding
ENSG00000218739.10	2420.22	1.57169	0.272102	5.77608	7.64591e-09	1.37087e-07	CEBPZOS	protein_coding
ENSG00000272054.1	72.0697	2.46889	0.514924	4.79467	1.62943e-06	1.94441e-05	AC007390.2	sense_intronic
ENSG00000236213.1	13.6231	3.14492	1.05201	2.98943	0.00279495	0.0145172	AC006369.1	antisense
ENSG00000163171.7	107.352	1.15866	0.412668	2.80773	0.00498918	0.0236664	CDC42EP3	protein_coding
ENSG00000188010.14	281.156	-1.01042	0.3216	-3.14185	0.00167886	0.00947536	MORN2	protein_coding
ENSG00000252473.1	73.0342	1.7526	0.475068	3.68915	0.000225004	0.00165933	RF00272	snoRNA
ENSG00000273035.1	81.3974	1.68252	0.431702	3.89741	9.72277e-05	0.000791765	AC007684.1	sense_intronic
ENSG00000162878.13	1360.83	-1.28111	0.294569	-4.34909	1.36702e-05	0.000135491	PKDCC	protein_coding
ENSG00000224875.2	111.123	-3.43209	0.470171	-7.29966	2.8849e-13	8.94816e-12	AC083949.1	antisense
ENSG00000057935.13	2921.65	1.2245	0.242581	5.04782	4.46891e-07	5.98911e-06	MTA3	protein_coding
ENSG00000200550.1	14.6237	3.50949	1.10134	3.18657	0.00143969	0.00831772	RNU6-137P	snRNA
ENSG00000152527.14	574.788	-1.48455	0.293723	-5.05424	4.32099e-07	5.80013e-06	PLEKHH2	protein_coding
ENSG00000223658.8	47.8685	-2.31935	0.552543	-4.1976	2.69763e-05	0.000251515	C1GALT1C1L	protein_coding
ENSG00000143921.8	811.126	-1.1201	0.288741	-3.87925	0.00010478	0.000846959	ABCG8	protein_coding
ENSG00000231336.1	7.49797	4.95133	1.8103	2.73509	0.00623626	0.0284603	AC017006.1	antisense
ENSG00000228100.1	615.359	4.01081	0.292179	13.7272	6.97519e-43	1.36016e-40	LINC01820	lincRNA
ENSG00000151665.12	1296.84	1.10229	0.254481	4.33153	1.48078e-05	0.000145788	PIGF	protein_coding
ENSG00000095002.14	2963.24	-1.69515	0.246777	-6.86917	6.45748e-12	1.69991e-10	MSH2	protein_coding
ENSG00000116062.15	4351.16	-2.63418	0.265991	-9.90328	4.02846e-23	2.68084e-21	MSH6	protein_coding
ENSG00000230773.8	98.5272	-1.17493	0.402599	-2.91837	0.00351865	0.0177023	AC092650.1	lincRNA
ENSG00000243244.6	49.1975	-1.48348	0.520652	-2.84927	0.00438191	0.0212383	STON1	protein_coding
ENSG00000204993.3	34.5802	6.18672	1.17683	5.25709	1.46356e-07	2.14669e-06	AC139712.1	processed_pseudogene
ENSG00000162924.14	579.418	-1.00345	0.287896	-3.48547	0.000491269	0.00329017	REL	protein_coding
ENSG00000170264.13	337.124	-1.22833	0.298376	-4.11672	3.84302e-05	0.000345748	FAM161A	protein_coding
ENSG00000229503.1	14.4745	3.80411	1.11503	3.41167	0.000645659	0.00419353	AC092155.2	processed_pseudogene
ENSG00000237162.1	49.6536	1.73097	0.551667	3.1377	0.00170277	0.00958239	AC007098.2	processed_pseudogene
ENSG00000115507.10	1201.99	-2.28847	0.281915	-8.11759	4.75529e-16	1.9078e-14	OTX1	protein_coding
ENSG00000228305.2	478.881	-1.19292	0.31599	-3.77518	0.00015989	0.0012266	AC016734.1	processed_pseudogene
ENSG00000225889.7	41.9636	1.60911	0.559628	2.87531	0.00403625	0.0198537	AC012368.1	antisense
ENSG00000179833.4	7719.49	1.68204	0.245193	6.86006	6.8831e-12	1.80547e-10	SERTAD2	protein_coding
ENSG00000204929.12	134.991	2.45115	0.383879	6.38521	1.71161e-10	3.82038e-09	AC007389.1	processed_transcript
ENSG00000281920.1	22.1635	3.08945	0.821766	3.75953	0.000170235	0.00129296	AC007389.5	lincRNA
ENSG00000196975.16	6911.57	1.53152	0.232625	6.58362	4.5913e-11	1.09785e-09	ANXA4	protein_coding
ENSG00000116035.4	87.8809	-1.86886	0.516226	-3.62023	0.000294342	0.00210705	VAX2	protein_coding
ENSG00000124374.9	88.3083	-1.63487	0.440195	-3.71396	0.000204041	0.00151988	PAIP2B	protein_coding
ENSG00000135636.14	83.759	1.34733	0.455041	2.96089	0.00306751	0.0157123	DYSF	protein_coding
ENSG00000003137.8	134.763	-3.15584	0.422956	-7.46139	8.56113e-14	2.76451e-12	CYP26B1	protein_coding
ENSG00000135638.13	204.385	2.48051	0.345112	7.18755	6.59661e-13	1.94307e-11	EMX1	protein_coding
ENSG00000144040.12	3056.64	1.29968	0.267809	4.85302	1.21597e-06	1.48772e-05	SFXN5	protein_coding
ENSG00000135617.4	299.335	-1.0093	0.328682	-3.07075	0.00213518	0.0115727	PRADC1	protein_coding
ENSG00000163013.11	1080.07	-1.41978	0.318593	-4.45641	8.33455e-06	8.72805e-05	FBXO41	protein_coding
ENSG00000144035.3	388.896	3.4233	0.319638	10.7099	9.14319e-27	7.98601e-25	NAT8	protein_coding
ENSG00000163016.10	249.903	4.10289	0.356773	11.5	1.31876e-30	1.388e-28	ALMS1P1	transcribed_unprocessed_pseudogene
ENSG00000273245.1	48.9523	1.51462	0.529038	2.86297	0.00419695	0.0204999	AC092653.1	lincRNA
ENSG00000187605.15	2524.54	-1.03382	0.268329	-3.85279	0.000116778	0.000930534	TET3	protein_coding
ENSG00000163170.12	949.302	-1.2081	0.266252	-4.53742	5.69458e-06	6.18244e-05	BOLA3	protein_coding
ENSG00000225439.2	324.626	-1.13986	0.294035	-3.87663	0.000105914	0.000854672	BOLA3-AS1	antisense
ENSG00000114993.16	3634.25	-1.10664	0.290493	-3.80951	0.00013924	0.00108573	RTKN	protein_coding
ENSG00000115297.11	24.7378	-2.81078	0.791122	-3.5529	0.000381002	0.00263807	TLX2	protein_coding
ENSG00000144045.14	1511.86	3.85191	0.271646	14.1799	1.22101e-45	2.67082e-43	DQX1	protein_coding
ENSG00000115318.12	77.2471	-1.38921	0.4661	-2.98051	0.00287771	0.0148877	LOXL3	protein_coding
ENSG00000115325.13	77.8228	-2.00358	0.479734	-4.17644	2.96106e-05	0.000272741	DOK1	protein_coding
ENSG00000272711.1	172.452	-1.51249	0.341298	-4.43159	9.35402e-06	9.63951e-05	AC019069.1	lincRNA
ENSG00000159399.9	8549.41	-1.36383	0.255529	-5.33728	9.43506e-08	1.41695e-06	HK2	protein_coding
ENSG00000236209.1	81.0495	-1.1182	0.442521	-2.52688	0.0115082	0.0474182	AC104135.1	lincRNA
ENSG00000230836.1	53.7487	-3.89515	0.645746	-6.03201	1.61933e-09	3.19483e-08	LINC01293	lincRNA
ENSG00000186854.11	70.354	-2.31812	0.48261	-4.80331	1.56067e-06	1.87124e-05	TRABD2A	protein_coding
ENSG00000034510.6	14947.3	-1.16236	0.298534	-3.89357	9.87814e-05	0.000803118	TMSB10	protein_coding
ENSG00000042445.14	8329.15	2.98938	0.263988	11.3239	9.98846e-30	1.00103e-27	RETSAT	protein_coding
ENSG00000152292.17	19.8023	2.58566	0.821837	3.14619	0.00165412	0.00934834	SH2D6	protein_coding
ENSG00000118640.11	1611.21	2.26541	0.256249	8.84069	9.51306e-19	4.67385e-17	VAMP8	protein_coding
ENSG00000168899.5	367.557	1.94452	0.341262	5.69802	1.21204e-08	2.11434e-07	VAMP5	protein_coding
ENSG00000168874.13	443.839	4.01314	0.312765	12.8312	1.09685e-37	1.62301e-35	ATOH8	protein_coding
ENSG00000115561.16	2017.45	1.1144	0.272057	4.09622	4.19951e-05	0.000374738	CHMP3	protein_coding
ENSG00000153561.13	4817.79	-1.03229	0.24052	-4.29191	1.77139e-05	0.00017211	RMND5A	protein_coding
ENSG00000163586.9	2797.28	-5.10349	0.295863	-17.2495	1.12817e-66	5.35456e-64	FABP1	protein_coding
ENSG00000172073.4	372.381	8.61683	0.778171	11.0732	1.69272e-28	1.58292e-26	TEX37	protein_coding
ENSG00000225420.1	281.191	7.62178	0.669737	11.3803	5.24404e-30	5.45099e-28	AC104134.1	antisense
ENSG00000230964.1	24.4472	2.99891	0.859126	3.49065	0.000481847	0.00323482	AC233266.1	processed_pseudogene
ENSG00000261600.1	63.583	3.57127	0.545726	6.54408	5.9863e-11	1.41395e-09	AC233266.2	lincRNA
ENSG00000155066.16	17.8081	3.81935	0.984994	3.87753	0.000105521	0.000852674	PROM2	protein_coding
ENSG00000230747.1	11.653	-3.35566	1.14747	-2.92439	0.00345128	0.0174086	AC021188.1	antisense
ENSG00000198885.9	644.973	-2.48085	0.311167	-7.97271	1.55228e-15	5.9433e-14	ITPRIPL1	protein_coding
ENSG00000115085.13	595.268	1.90312	0.277162	6.86644	6.58237e-12	1.72839e-10	ZAP70	protein_coding
ENSG00000075568.17	5376.24	1.44684	0.241217	5.99809	1.99653e-09	3.87521e-08	TMEM131	protein_coding
ENSG00000238719.1	21.372	2.65853	0.830475	3.20122	0.00136848	0.00796115	RNU7-96P	snRNA
ENSG00000232034.1	422.203	1.10564	0.281218	3.93161	8.43804e-05	0.000697532	AC092168.2	sense_intronic
ENSG00000286101.1	314.179	1.77169	0.325927	5.43584	5.45381e-08	8.50531e-07	AC093894.2	lincRNA
ENSG00000115590.14	46.929	-2.53683	0.579762	-4.37564	1.21077e-05	0.000121439	IL1R2	protein_coding
ENSG00000115594.12	1681.72	-1.44115	0.248286	-5.80438	6.4603e-09	1.1742e-07	IL1R1	protein_coding
ENSG00000115604.10	75.2848	-3.6665	0.536168	-6.83833	8.01192e-12	2.08418e-10	IL18R1	protein_coding
ENSG00000228528.1	7.4747	3.93286	1.54169	2.55101	0.0107411	0.0448079	AC068057.1	lincRNA
ENSG00000224509.2	4.53943	-5.57069	2.06247	-2.70098	0.00691364	0.0309729	AC010884.1	antisense
ENSG00000135966.13	3238.16	1.07645	0.269801	3.9898	6.61292e-05	0.000563319	TGFBRAP1	protein_coding
ENSG00000115641.19	404.43	1.73357	0.30178	5.74449	9.2199e-09	1.63099e-07	FHL2	protein_coding
ENSG00000225328.1	16.0903	2.73134	0.935297	2.92029	0.00349704	0.0176042	LINC01594	antisense
ENSG00000236877.2	16.6891	4.05123	1.05821	3.82837	0.000128994	0.00101569	SETD6P1	processed_pseudogene
ENSG00000198203.10	59.1928	-1.50922	0.49228	-3.06577	0.00217109	0.0117407	SULT1C2	protein_coding
ENSG00000198075.10	433.271	1.62516	0.30379	5.34962	8.81395e-08	1.32923e-06	SULT1C4	protein_coding
ENSG00000214184.3	132.481	1.33433	0.367237	3.63343	0.000279676	0.00201237	GCC2-AS1	antisense
ENSG00000163006.12	861.201	-1.09989	0.263203	-4.17884	2.92995e-05	0.000270108	CCDC138	protein_coding
ENSG00000172985.10	69.7771	-3.22936	0.511796	-6.30986	2.79293e-10	6.10519e-09	SH3RF3	protein_coding
ENSG00000224959.1	793.724	1.21456	0.268811	4.51825	6.23537e-06	6.71163e-05	AC017002.1	lincRNA
ENSG00000188177.14	292.576	1.31712	0.299651	4.39552	1.10508e-05	0.00011173	ZC3H6	protein_coding
ENSG00000144130.11	253.418	3.03839	0.33065	9.18914	3.95986e-20	2.15606e-18	NT5DC4	protein_coding
ENSG00000280228.1	139.416	1.61463	0.3614	4.4677	7.90658e-06	8.32524e-05	AC079753.1	TEC
ENSG00000236397.3	75.7325	1.24602	0.447058	2.78714	0.00531747	0.0249508	DDX11L2	unprocessed_pseudogene
ENSG00000240356.6	388.536	1.13673	0.288294	3.94294	8.04874e-05	0.000669974	RPL23AP7	transcribed_processed_pseudogene
ENSG00000144134.18	712.371	1.38249	0.269897	5.12227	3.01883e-07	4.1542e-06	RABL2A	protein_coding
ENSG00000144158.4	101.092	-1.1119	0.435798	-2.5514	0.010729	0.0447714	AL078621.1	processed_pseudogene
ENSG00000279227.1	160.031	-1.1338	0.35191	-3.22185	0.00127368	0.00750687	AC009303.4	TEC
ENSG00000155368.16	4382.85	-1.54008	0.269918	-5.70571	1.15856e-08	2.02667e-07	DBI	protein_coding
ENSG00000280409.1	141.697	-1.48897	0.37103	-4.01309	5.993e-05	0.000515927	LINC01101	TEC
ENSG00000265451.1	34.6759	-1.65771	0.616267	-2.68993	0.00714669	0.0318046	AC012447.1	antisense
ENSG00000136717.15	784.585	-2.08322	0.336881	-6.18385	6.25567e-10	1.31025e-08	BIN1	protein_coding
ENSG00000236682.1	218.771	-2.05638	0.325857	-6.31069	2.77791e-10	6.08167e-09	MAP3K2-DT	lincRNA
ENSG00000231731.7	48.8961	-1.56412	0.54671	-2.86097	0.00422341	0.0206091	AC010976.1	antisense
ENSG00000169994.18	101.905	1.70374	0.42564	4.00276	6.26066e-05	0.000536582	MYO7B	protein_coding
ENSG00000136720.7	6756.29	1.50285	0.276896	5.42751	5.7146e-08	8.87899e-07	HS6ST1	protein_coding
ENSG00000180178.11	331.385	2.43206	0.315346	7.71236	1.23516e-14	4.32135e-13	FAR2P1	transcribed_unprocessed_pseudogene
ENSG00000286058.1	849.634	2.01848	0.277675	7.26922	3.6156e-13	1.10243e-11	AC018865.3	processed_transcript
ENSG00000196604.12	1675.51	1.799	0.266533	6.74964	1.48215e-11	3.7296e-10	POTEF	protein_coding
ENSG00000223760.4	42.2558	4.23928	0.708099	5.98685	2.13946e-09	4.13667e-08	MED15P9	transcribed_unprocessed_pseudogene
ENSG00000178162.8	31.1236	2.13876	0.662353	3.22904	0.00124209	0.00735103	FAR2P2	transcribed_unprocessed_pseudogene
ENSG00000196834.12	103.32	1.7281	0.412178	4.1926	2.75771e-05	0.000256134	POTEI	protein_coding
ENSG00000282944.1	15.442	3.06171	0.958421	3.19454	0.00140054	0.00812669	AC140481.3	processed_transcript
ENSG00000136002.18	129.695	1.38764	0.410743	3.37837	0.000729157	0.00466241	ARHGEF4	protein_coding
ENSG00000188219.14	341.912	1.89033	0.292988	6.45191	1.10449e-10	2.52577e-09	POTEE	protein_coding
ENSG00000231431.7	80.698	2.6953	0.46114	5.84486	5.07002e-09	9.37079e-08	FAR2P4	transcribed_unprocessed_pseudogene
ENSG00000163040.14	83.457	2.15299	0.46861	4.59441	4.33975e-06	4.83251e-05	CCDC74A	protein_coding
ENSG00000224679.1	7.82216	4.00015	1.5332	2.60901	0.00908033	0.0390054	MED15P4	unprocessed_pseudogene
ENSG00000286208.1	84.8378	4.06443	0.536428	7.57683	3.54088e-14	1.18445e-12	AC093838.2	lincRNA
ENSG00000204434.5	42.7053	2.41482	0.592228	4.07751	4.55203e-05	0.000403191	POTEKP	unprocessed_pseudogene
ENSG00000273588.1	9.28441	4.16679	1.4715	2.83166	0.00463066	0.0222638	AC093838.1	unprocessed_pseudogene
ENSG00000224559.2	35.4253	4.13036	0.763296	5.41122	6.25984e-08	9.64866e-07	LINC01087	lincRNA
ENSG00000076003.5	1184.96	-2.6688	0.257657	-10.358	3.85105e-25	3.04632e-23	MCM6	protein_coding
ENSG00000231890.7	182.212	1.29867	0.353803	3.67059	0.000241991	0.00176751	DARS-AS1	antisense
ENSG00000121966.6	38.0713	-2.08054	0.611882	-3.40024	0.000673267	0.00434257	CXCR4	protein_coding
ENSG00000281469.1	105.99	1.28501	0.391461	3.28259	0.00102857	0.00625422	AC019226.1	TEC
ENSG00000231969.1	242.011	-1.56658	0.357071	-4.38729	1.1477e-05	0.000115621	AC007364.1	antisense
ENSG00000123609.10	87.2878	-2.25889	0.437261	-5.166	2.39161e-07	3.36094e-06	NMI	protein_coding
ENSG00000177917.10	995.341	-1.28449	0.253746	-5.06213	4.14609e-07	5.58622e-06	ARL6IP6	protein_coding
ENSG00000226383.6	252.905	1.00997	0.311893	3.23818	0.00120295	0.00714863	LINC01876	lincRNA
ENSG00000283436.1	8.1021	4.00558	1.48004	2.7064	0.0068016	0.0305417	LINC01958	lincRNA
ENSG00000153237.17	59.2827	-2.26712	0.519825	-4.3613	1.2929e-05	0.000128701	CCDC148	protein_coding
ENSG00000204380.4	28.0573	2.0347	0.679606	2.99394	0.00275397	0.0143488	PKP4-AS1	antisense
ENSG00000228586.1	25.9074	6.75185	1.55694	4.33662	1.44693e-05	0.000142735	AC005042.2	lincRNA
ENSG00000231675.1	10.9416	4.50191	1.41236	3.18752	0.00143501	0.00829831	AC005042.3	processed_pseudogene
ENSG00000196151.10	643.437	1.07197	0.270971	3.95604	7.62036e-05	0.000638541	WDSUB1	protein_coding
ENSG00000241399.7	623.475	-1.43669	0.297263	-4.83304	1.34463e-06	1.62851e-05	CD302	protein_coding
ENSG00000115267.7	296.927	-1.51069	0.302967	-4.98632	6.15407e-07	8.03767e-06	IFIH1	protein_coding
ENSG00000212312.1	20.5592	7.87658	1.64146	4.79853	1.59832e-06	1.9091e-05	RNA5SP109	rRNA_pseudogene
ENSG00000182263.14	749.872	-1.82453	0.279091	-6.5374	6.25993e-11	1.47167e-09	FIGN	protein_coding
ENSG00000236283.4	481.193	2.37517	0.300526	7.90337	2.71453e-15	1.01462e-13	AC019197.1	antisense
ENSG00000199508.1	26.8064	2.72141	0.729319	3.73144	0.000190391	0.00143178	RNA5SP110	rRNA_pseudogene
ENSG00000169507.9	543.232	-2.40535	0.3052	-7.88121	3.24221e-15	1.20115e-13	SLC38A11	protein_coding
ENSG00000228222.1	14.8705	-2.43503	0.939342	-2.59227	0.00953442	0.0405955	AC073050.1	lincRNA
ENSG00000172318.5	45.5278	-1.53271	0.542712	-2.82417	0.00474031	0.0226999	B3GALT1	protein_coding
ENSG00000152253.9	919.96	-1.78521	0.259477	-6.88006	5.98263e-12	1.57978e-10	SPC25	protein_coding
ENSG00000213160.10	2518.14	-1.07856	0.247026	-4.3662	1.26427e-05	0.000126052	KLHL23	protein_coding
ENSG00000138382.15	1533.44	1.07174	0.243764	4.39663	1.09946e-05	0.000111296	METTL5	protein_coding
ENSG00000239467.5	46.6224	-3.79909	0.65649	-5.78697	7.16654e-09	1.29486e-07	AC007405.3	lincRNA
ENSG00000128683.14	254.368	1.79931	0.31233	5.76091	8.366e-09	1.49147e-07	GAD1	protein_coding
ENSG00000123600.19	3591.83	2.27043	0.252011	9.00924	2.07482e-19	1.07171e-17	METTL8	protein_coding
ENSG00000224553.1	75.0572	3.31066	0.494076	6.70072	2.07394e-11	5.13991e-10	AC008065.1	processed_pseudogene
ENSG00000115827.14	1699.34	1.14431	0.264118	4.33257	1.47381e-05	0.00014516	DCAF17	protein_coding
ENSG00000071967.12	132.776	-1.94814	0.382128	-5.09813	3.43023e-07	4.66923e-06	CYBRD1	protein_coding
ENSG00000115840.14	260.319	1.17537	0.313209	3.75266	0.000174965	0.00132448	SLC25A12	protein_coding
ENSG00000128708.13	2734.76	-1.15372	0.26406	-4.36914	1.24737e-05	0.000124601	HAT1	protein_coding
ENSG00000144355.15	99.1916	-2.36623	0.462842	-5.1124	3.18093e-07	4.36056e-06	DLX1	protein_coding
ENSG00000260868.1	18.4051	2.51073	0.884466	2.83869	0.00452987	0.0218544	LINC01960	lincRNA
ENSG00000237380.7	19.2453	-2.20083	0.839948	-2.62019	0.00878806	0.0379704	HOXD-AS2	antisense
ENSG00000128652.11	30.0513	-2.22615	0.721498	-3.08545	0.00203244	0.0110999	HOXD3	protein_coding
ENSG00000225808.1	76.3477	1.11752	0.433868	2.57571	0.0100036	0.0422995	DNAJC19P5	processed_pseudogene
ENSG00000213963.6	209.436	1.62551	0.326183	4.98342	6.24691e-07	8.15469e-06	AC019080.1	sense_overlapping
ENSG00000128655.18	119.975	-1.72353	0.388996	-4.43071	9.39241e-06	9.67511e-05	PDE11A	protein_coding
ENSG00000234663.6	182.699	4.49721	0.431987	10.4105	2.22013e-25	1.77293e-23	LINC01934	lincRNA
ENSG00000260742.1	106.186	-2.35714	0.44604	-5.2846	1.25978e-07	1.8641e-06	AC009962.1	antisense
ENSG00000150722.10	45.5591	-3.51172	0.653728	-5.37184	7.79385e-08	1.18605e-06	PPP1R1C	protein_coding
ENSG00000204262.13	208.423	1.58634	0.324578	4.88739	1.02183e-06	1.27754e-05	COL5A2	protein_coding
ENSG00000138449.10	5065.3	3.30078	0.252277	13.0839	4.06858e-39	6.4368e-37	SLC40A1	protein_coding
ENSG00000151687.14	332.247	1.05322	0.312929	3.36568	0.000763541	0.00485267	ANKAR	protein_coding
ENSG00000151689.13	1809.77	1.32646	0.250241	5.30074	1.15334e-07	1.71569e-06	INPP1	protein_coding
ENSG00000138386.17	1792.25	-2.04374	0.244404	-8.36215	6.15849e-17	2.69421e-15	NAB1	protein_coding
ENSG00000115415.18	11562	1.04482	0.233806	4.46877	7.8672e-06	8.29146e-05	STAT1	protein_coding
ENSG00000229023.1	60.846	1.93087	0.493613	3.9117	9.16482e-05	0.000752239	AC067945.1	processed_pseudogene
ENSG00000227542.1	108.409	-1.25945	0.390119	-3.22837	0.00124499	0.0073654	AC092614.1	lincRNA
ENSG00000173559.12	5077.83	1.03051	0.268429	3.83904	0.000123515	0.000978279	NABP1	protein_coding
ENSG00000168497.5	4242.1	2.83417	0.272938	10.3839	2.93422e-25	2.3284e-23	CAVIN2	protein_coding
ENSG00000233766.7	221.789	2.92085	0.356948	8.18285	2.77213e-16	1.14504e-14	AC098617.1	antisense
ENSG00000196950.14	2710.88	1.54822	0.273993	5.6506	1.5989e-08	2.73421e-07	SLC39A10	protein_coding
ENSG00000119041.11	3269.88	1.18753	0.287285	4.13364	3.57062e-05	0.000324022	GTF3C3	protein_coding
ENSG00000197121.15	3851.67	2.56773	0.258083	9.94923	2.54147e-23	1.71857e-21	PGAP1	protein_coding
ENSG00000119042.17	1242.21	-2.50426	0.255862	-9.78755	1.27348e-22	8.10997e-21	SATB2	protein_coding
ENSG00000225953.2	31.9427	-2.36788	0.668762	-3.54069	0.000399084	0.00274907	SATB2-AS1	antisense
ENSG00000138356.14	1533.82	2.01723	0.253087	7.97049	1.58045e-15	6.04199e-14	AOX1	protein_coding
ENSG00000196290.15	921.39	-1.08149	0.275278	-3.92871	8.54018e-05	0.000705743	NIF3L1	protein_coding
ENSG00000226312.7	48.3309	-1.83584	0.606013	-3.02937	0.00245065	0.0130027	CFLAR-AS1	antisense
ENSG00000003400.14	1950.56	1.35852	0.258014	5.26531	1.39953e-07	2.05998e-06	CASP10	protein_coding
ENSG00000155760.2	104.506	-1.82804	0.426133	-4.28983	1.78807e-05	0.000173489	FZD7	protein_coding
ENSG00000273456.1	54.0766	-1.81518	0.513419	-3.53548	0.00040704	0.00279457	AC064836.3	lincRNA
ENSG00000138380.18	233.041	1.15572	0.355151	3.25415	0.00113732	0.00680523	CARF	protein_coding
ENSG00000116117.18	1501.5	1.52527	0.244994	6.22574	4.79278e-10	1.02171e-08	PARD3B	protein_coding
ENSG00000118257.16	5217.38	3.17911	0.257765	12.3334	5.98901e-35	7.53268e-33	NRP2	protein_coding
ENSG00000204186.9	549.089	-1.24746	0.291587	-4.27818	1.88428e-05	0.000181606	ZDBF2	protein_coding
ENSG00000114948.13	215.188	2.44942	0.350324	6.99187	2.71239e-12	7.45685e-11	ADAM23	protein_coding
ENSG00000138400.13	38.6675	-1.48591	0.579596	-2.5637	0.0103563	0.0434832	MDH1B	protein_coding
ENSG00000178385.15	1818.57	1.28991	0.243365	5.30029	1.15618e-07	1.71788e-06	PLEKHM3	protein_coding
ENSG00000225111.1	174.658	2.53692	0.393467	6.44761	1.13624e-10	2.59131e-09	AC083900.1	sense_intronic
ENSG00000115365.11	3564.55	-1.03427	0.244151	-4.2362	2.27338e-05	0.00021515	LANCL1	protein_coding
ENSG00000197585.9	11.7492	3.13345	1.18053	2.65428	0.00794776	0.0348121	AC068051.1	antisense
ENSG00000138376.11	1032.28	-1.42618	0.274264	-5.20004	1.99242e-07	2.84445e-06	BARD1	protein_coding
ENSG00000229267.2	37.7801	-1.65396	0.591523	-2.7961	0.00517229	0.0243878	AC016708.1	antisense
ENSG00000144452.15	5430.63	7.10479	0.347144	20.4664	4.29424e-93	4.5009e-90	ABCA12	protein_coding
ENSG00000115425.14	1051.88	-1.14202	0.257625	-4.43286	9.29926e-06	9.60669e-05	PECR	protein_coding
ENSG00000163449.11	168.942	-2.02511	0.348102	-5.81758	5.97068e-09	1.0931e-07	TMEM169	protein_coding
ENSG00000115457.10	98.2104	3.28728	0.458466	7.17016	7.49106e-13	2.18859e-11	IGFBP2	protein_coding
ENSG00000180871.8	118.273	4.4226	0.488626	9.0511	1.41529e-19	7.43251e-18	CXCR2	protein_coding
ENSG00000135926.15	8721.91	1.9843	0.255614	7.76289	8.30147e-15	2.94117e-13	TMBIM1	protein_coding
ENSG00000158428.4	243.75	6.5309	0.535494	12.196	3.26342e-34	4.02408e-32	CATIP	protein_coding
ENSG00000127831.10	4274.52	-1.05236	0.258288	-4.07436	4.61404e-05	0.000407679	VIL1	protein_coding
ENSG00000144580.13	4169.14	-1.45687	0.24134	-6.03659	1.57401e-09	3.1103e-08	CNOT9	protein_coding
ENSG00000115596.4	24.6593	-2.69828	0.790889	-3.41171	0.000645562	0.00419353	WNT6	protein_coding
ENSG00000171450.5	4.7961	-5.64954	2.0363	-2.77442	0.0055301	0.0257277	CDK5R2	protein_coding
ENSG00000127824.14	712.527	-2.18883	0.308758	-7.08914	1.34945e-12	3.83503e-11	TUBA4A	protein_coding
ENSG00000243910.7	142.284	6.30626	1.7817	3.53945	0.000400957	0.00276028	TUBA4B	protein_coding
ENSG00000123992.19	1310.69	-1.76581	0.288577	-6.11901	9.41567e-10	1.92405e-08	DNPEP	protein_coding
ENSG00000175084.11	21.1627	3.41463	0.939911	3.63293	0.000280223	0.00201573	DES	protein_coding
ENSG00000072195.15	88.2667	3.52482	0.476086	7.40375	1.32394e-13	4.221e-12	SPEG	protein_coding
ENSG00000072182.12	13.4338	3.41231	1.11898	3.04949	0.00229234	0.0123003	ASIC4	protein_coding
ENSG00000188760.10	354.521	-1.6765	0.322783	-5.19391	2.05927e-07	2.92992e-06	TMEM198	protein_coding
ENSG00000114923.17	59.9807	-1.61525	0.527574	-3.06165	0.00220123	0.0118747	SLC4A3	protein_coding
ENSG00000124003.12	38.6557	-2.01722	0.605095	-3.33372	0.000856918	0.00535015	MOGAT1	protein_coding
ENSG00000123983.14	12739	1.02214	0.248836	4.10769	3.99642e-05	0.00035814	ACSL3	protein_coding
ENSG00000152049.6	25.8182	2.52457	0.725902	3.47783	0.000505483	0.00337458	KCNE4	protein_coding
ENSG00000152056.17	430.365	2.18609	0.286309	7.63541	2.25097e-14	7.64144e-13	AP1S3	protein_coding
ENSG00000135919.13	6134.59	2.13414	0.235449	9.06414	1.25595e-19	6.62335e-18	SERPINE2	protein_coding
ENSG00000135905.19	78.0983	1.83595	0.446432	4.1125	3.914e-05	0.000351757	DOCK10	protein_coding
ENSG00000236432.7	96.4435	-1.07466	0.419677	-2.56069	0.0104465	0.0438187	AC097662.1	antisense
ENSG00000042304.11	21.6598	-2.73681	0.810096	-3.37838	0.000729154	0.00466241	C2orf83	protein_coding
ENSG00000236116.1	13.1298	-3.94829	1.21994	-3.23646	0.00121024	0.00718854	AC064853.1	antisense
ENSG00000135917.15	1310.02	-4.67528	0.275525	-16.9687	1.40104e-64	5.77758e-62	SLC19A3	protein_coding
ENSG00000115009.13	11123.4	-1.85658	0.253434	-7.32569	2.3767e-13	7.43605e-12	CCL20	protein_coding
ENSG00000153823.18	85.5531	2.81397	0.452719	6.2157	5.10949e-10	1.0848e-08	PID1	protein_coding
ENSG00000235419.5	35.2193	4.57178	0.81102	5.63707	1.7297e-08	2.94588e-07	AC010149.1	antisense
ENSG00000156966.7	118.021	2.59448	0.417835	6.20935	5.32026e-10	1.12747e-08	B3GNT7	protein_coding
ENSG00000207280.1	174.723	-3.02324	0.400748	-7.54399	4.55822e-14	1.50673e-12	SNORD20	snoRNA
ENSG00000163273.4	46.3369	1.35823	0.531858	2.55375	0.0106571	0.0445165	NPPC	protein_coding
ENSG00000115468.12	49.1489	-2.52674	0.552781	-4.57096	4.85499e-06	5.33773e-05	EFHD1	protein_coding
ENSG00000222001.2	36.8947	-1.91465	0.600044	-3.19085	0.00141857	0.00821081	AC106876.1	processed_transcript
ENSG00000168918.14	2789.53	1.79599	0.310693	5.78061	7.44314e-09	1.34025e-07	INPP5D	protein_coding
ENSG00000123485.12	2385.41	-1.05255	0.26276	-4.00572	6.18277e-05	0.000531537	HJURP	protein_coding
ENSG00000188042.8	59.5369	-1.48065	0.489543	-3.02454	0.00249008	0.013175	ARL4C	protein_coding
ENSG00000280744.1	184.274	5.55709	0.510562	10.8842	1.37033e-27	1.23995e-25	LINC01173	lincRNA
ENSG00000124835.2	73.3226	2.79461	0.523235	5.34101	9.24287e-08	1.39224e-06	AC105760.1	antisense
ENSG00000144488.15	485.435	4.3707	0.335526	13.0264	8.65761e-39	1.36114e-36	ESPNL	protein_coding
ENSG00000168427.9	259.436	6.09232	0.48074	12.6728	8.36762e-37	1.16291e-34	KLHL30	protein_coding
ENSG00000186235.10	22.1047	5.51265	1.22863	4.48682	7.22954e-06	7.69611e-05	LINC02610	processed_transcript
ENSG00000182083.7	17.5513	6.19719	1.61445	3.83857	0.000123752	0.000979849	OR6B2	protein_coding
ENSG00000178602.8	31.2834	3.98317	0.807019	4.93565	7.98824e-07	1.02054e-05	OTOS	protein_coding
ENSG00000063660.9	4749.96	4.35556	0.295145	14.7574	2.75778e-49	7.00726e-47	GPC1	protein_coding
ENSG00000178623.12	1401.12	3.75346	0.301209	12.4613	1.2132e-35	1.60621e-33	GPR35	protein_coding
ENSG00000233392.5	129.926	5.92922	0.62008	9.56203	1.15473e-21	6.93249e-20	AC104809.2	processed_transcript
ENSG00000162804.14	103.252	2.73658	0.449425	6.08908	1.13563e-09	2.29452e-08	SNED1	protein_coding
ENSG00000180902.18	781.652	1.12473	0.30851	3.64569	0.000266671	0.00192706	D2HGDH	protein_coding
ENSG00000224272.2	40.9333	-2.14085	0.5851	-3.65894	0.000253259	0.00183913	AC131097.3	antisense
ENSG00000233806.7	11.9815	4.63644	1.38469	3.34837	0.000812896	0.00510827	LINC01237	processed_transcript
ENSG00000237940.3	24.0211	5.04562	1.06287	4.74715	2.06303e-06	2.42616e-05	LINC01238	lincRNA
ENSG00000220804.8	538.591	1.39001	0.277393	5.01097	5.41565e-07	7.14747e-06	LINC01881	transcribed_unprocessed_pseudogene
ENSG00000134107.4	1937.1	1.16265	0.307169	3.78504	0.000153686	0.0011837	BHLHE40	protein_coding
ENSG00000233912.1	32.9023	2.37921	0.661583	3.59624	0.000322853	0.00228771	AC026202.2	antisense
ENSG00000180914.10	114.438	-1.30836	0.392199	-3.33597	0.000850038	0.00531644	OXTR	protein_coding
ENSG00000070950.10	1278.5	-1.14742	0.250316	-4.58387	4.56441e-06	5.05805e-05	RAD18	protein_coding
ENSG00000196220.16	569.515	4.10901	0.302636	13.5774	5.45289e-42	1.00858e-39	SRGAP3	protein_coding
ENSG00000156959.9	31.4423	-1.82886	0.665375	-2.74862	0.00598474	0.0274719	LHFPL4	protein_coding
ENSG00000180385.8	1312.92	-1.92457	0.250171	-7.69305	1.43673e-14	4.99185e-13	EMC3-AS1	transcribed_unprocessed_pseudogene
ENSG00000206567.9	41.3772	1.53598	0.608154	2.52565	0.0115484	0.0475528	AC022007.1	lincRNA
ENSG00000144554.10	2899.86	-1.06872	0.270886	-3.94529	7.97035e-05	0.000663888	FANCD2	protein_coding
ENSG00000134070.5	688.658	-1.15008	0.310272	-3.70668	0.000209995	0.00155824	IRAK2	protein_coding
ENSG00000157087.19	685.906	4.63482	0.296776	15.6172	5.55596e-55	1.62512e-52	ATP2B2	protein_coding
ENSG00000157103.12	23.0708	3.12505	0.800945	3.9017	9.55195e-05	0.000779621	SLC6A1	protein_coding
ENSG00000197548.12	878.848	1.16364	0.257136	4.5254	6.02811e-06	6.50804e-05	ATG7	protein_coding
ENSG00000132170.21	525.094	-1.31419	0.274664	-4.78472	1.71229e-06	2.03557e-05	PPARG	protein_coding
ENSG00000088726.16	530.049	7.66401	0.514725	14.8895	3.85448e-50	1.04258e-47	TMEM40	protein_coding
ENSG00000144711.16	3905.83	1.552	0.27965	5.5498	2.86002e-08	4.6808e-07	IQSEC1	protein_coding
ENSG00000163517.15	466.536	1.1632	0.320805	3.62588	0.000287976	0.00206618	HDAC11	protein_coding
ENSG00000163520.14	74.6126	3.97462	0.536872	7.40329	1.32848e-13	4.23012e-12	FBLN2	protein_coding
ENSG00000154767.14	3182.83	2.28248	0.262766	8.68637	3.74209e-18	1.77608e-16	XPC	protein_coding
ENSG00000144596.13	799.004	7.06666	0.400151	17.66	8.52547e-70	4.56294e-67	GRIP2	protein_coding
ENSG00000207163.1	9.98334	6.83591	1.76491	3.87323	0.000107402	0.000865097	RNU6-905P	snRNA
ENSG00000234123.1	116.325	6.12946	0.667277	9.18577	4.086e-20	2.21994e-18	RHBDF1P1	processed_pseudogene
ENSG00000169814.13	490.324	-1.10262	0.272623	-4.04449	5.24372e-05	0.000458165	BTD	protein_coding
ENSG00000154822.18	251.083	5.37225	0.420677	12.7705	2.39657e-37	3.42533e-35	PLCL2	protein_coding
ENSG00000182568.17	19.3871	-2.857	0.88683	-3.22158	0.00127485	0.00751202	SATB1	protein_coding
ENSG00000114166.8	420.22	1.59659	0.309318	5.16163	2.44806e-07	3.43643e-06	KAT2B	protein_coding
ENSG00000151789.12	23.3365	3.305	0.815045	4.05499	5.01357e-05	0.00044035	ZNF385D	protein_coding
ENSG00000132967.9	882.469	-1.00438	0.290019	-3.46315	0.000533887	0.00354165	HMGB1P5	transcribed_processed_pseudogene
ENSG00000174738.13	967.911	-1.1499	0.269925	-4.26006	2.04371e-05	0.000195177	NR1D2	protein_coding
ENSG00000163491.16	406.004	-1.21912	0.291592	-4.1809	2.90356e-05	0.000268131	NEK10	protein_coding
ENSG00000033867.16	3226.23	-1.24333	0.252609	-4.92194	8.56888e-07	1.08371e-05	SLC4A7	protein_coding
ENSG00000271943.2	75.8694	-1.25727	0.442457	-2.84157	0.00448925	0.0216834	AC098614.3	transcribed_processed_pseudogene
ENSG00000163508.12	100.225	-1.13561	0.409048	-2.77623	0.00549928	0.0256079	EOMES	protein_coding
ENSG00000152642.10	1712.58	1.91634	0.245191	7.81571	5.46558e-15	1.9868e-13	GPD1L	protein_coding
ENSG00000261572.1	100.041	-1.44938	0.409299	-3.54112	0.00039843	0.00274664	AC097639.1	sense_intronic
ENSG00000170293.9	211.709	-1.00867	0.332439	-3.03414	0.00241225	0.0128288	CMTM8	protein_coding
ENSG00000153551.13	527.156	-1.10676	0.271472	-4.07689	4.56413e-05	0.000403979	CMTM7	protein_coding
ENSG00000153558.15	217.955	2.61751	0.336133	7.78714	6.85429e-15	2.47374e-13	FBXL2	protein_coding
ENSG00000076242.14	2885.44	1.02863	0.248986	4.13128	3.60747e-05	0.000326777	MLH1	protein_coding
ENSG00000136059.14	51.5194	-3.63331	0.62508	-5.81255	6.15279e-09	1.12538e-07	VILL	protein_coding
ENSG00000187091.13	1177.96	2.18168	0.303308	7.19297	6.33983e-13	1.86962e-11	PLCD1	protein_coding
ENSG00000172936.14	1032.73	-1.05697	0.281421	-3.75583	0.000172766	0.00130941	MYD88	protein_coding
ENSG00000183873.15	42.892	-2.20928	0.60987	-3.62254	0.000291722	0.00209127	SCN5A	protein_coding
ENSG00000182606.15	7265.93	1.89917	0.244577	7.76514	8.15531e-15	2.90165e-13	TRAK1	protein_coding
ENSG00000222872.1	21.3858	2.14179	0.807709	2.65169	0.00800898	0.0350497	RNU4-78P	snRNA
ENSG00000114812.13	30.5499	2.86836	0.728337	3.93824	8.20818e-05	0.000680768	VIPR1	protein_coding
ENSG00000008324.11	327.992	-1.33143	0.317398	-4.19483	2.73077e-05	0.000254041	SS18L2	protein_coding
ENSG00000114853.14	201.929	-1.09723	0.34626	-3.16881	0.00153062	0.00877056	ZBTB47	protein_coding
ENSG00000010282.14	8.96691	4.16441	1.43959	2.89277	0.00381855	0.0189235	HHATL	protein_coding
ENSG00000173811.10	33.0967	-2.13227	0.654465	-3.25804	0.00112186	0.00672715	CCDC13-AS1	antisense
ENSG00000163810.11	222.447	6.4105	0.54269	11.8125	3.36521e-32	3.81315e-30	TGM4	protein_coding
ENSG00000235845.1	14.9699	7.42524	1.67675	4.42836	9.4953e-06	9.76909e-05	AC098649.1	antisense
ENSG00000163814.8	23.2685	-3.35321	0.831354	-4.03343	5.49679e-05	0.000478118	CDCP1	protein_coding
ENSG00000249992.1	18.6238	-2.19536	0.826544	-2.65607	0.00790572	0.0346548	TMEM158	protein_coding
ENSG00000163820.15	1292.24	1.04246	0.282402	3.69143	0.000222999	0.00164599	FYCO1	protein_coding
ENSG00000241186.10	548.082	-2.50195	0.290276	-8.6192	6.74264e-18	3.14095e-16	TDGF1	protein_coding
ENSG00000088727.12	232.971	-1.02288	0.328494	-3.11384	0.00184672	0.0102404	KIF9	protein_coding
ENSG00000164045.11	1796.18	-2.35271	0.252871	-9.30402	1.35234e-20	7.62738e-19	CDC25A	protein_coding
ENSG00000164051.14	889.734	1.22036	0.303736	4.01783	5.87374e-05	0.000507222	CCDC51	protein_coding
ENSG00000114268.12	411.618	1.46096	0.348001	4.19815	2.69106e-05	0.000250996	PFKFB4	protein_coding
ENSG00000145040.4	182.662	3.22091	0.392955	8.19663	2.47224e-16	1.02792e-14	UCN2	protein_coding
ENSG00000114270.17	6270.37	4.15085	0.319415	12.9952	1.30343e-38	2.03651e-36	COL7A1	protein_coding
ENSG00000008300.17	965.877	-1.00759	0.303219	-3.32296	0.000890669	0.00553205	CELSR3	protein_coding
ENSG00000233276.5	9471.61	1.9314	0.286411	6.74346	1.54654e-11	3.88256e-10	GPX1	polymorphic_pseudogene
ENSG00000173531.15	1254.9	1.0179	0.321313	3.16795	0.00153517	0.00878862	MST1	protein_coding
ENSG00000185614.5	35.3843	2.53151	0.640036	3.95527	7.64497e-05	0.00064039	INKA1	protein_coding
ENSG00000182179.13	178.688	-1.71392	0.402697	-4.2561	2.08022e-05	0.000198362	UBA7	protein_coding
ENSG00000164076.17	11.3441	-4.35392	1.40586	-3.09697	0.0019551	0.0107404	CAMKV	protein_coding
ENSG00000001617.12	4078.19	2.37383	0.29906	7.93765	2.0605e-15	7.77088e-14	SEMA3F	protein_coding
ENSG00000188338.15	1064.43	-1.13695	0.313616	-3.6253	0.000288624	0.00207024	SLC38A3	protein_coding
ENSG00000114353.17	2549.3	-1.14203	0.295538	-3.86424	0.000111437	0.000894731	GNAI2	protein_coding
ENSG00000232352.1	88.4444	3.37883	0.470444	7.18221	6.85957e-13	2.01541e-11	SEMA3B-AS1	antisense
ENSG00000012171.19	6503.7	2.6446	0.306041	8.64133	5.55639e-18	2.59797e-16	SEMA3B	protein_coding
ENSG00000214706.10	1304.13	-1.27988	0.311108	-4.11393	3.88976e-05	0.000349703	IFRD2	protein_coding
ENSG00000041880.14	904.566	1.52068	0.289972	5.24424	1.5693e-07	2.2858e-06	PARP3	protein_coding
ENSG00000090097.21	2488.04	1.07115	0.297979	3.59472	0.000324744	0.00229852	PCBP4	protein_coding
ENSG00000247596.9	1930.58	1.66123	0.284775	5.83346	5.42893e-09	9.96823e-08	TWF2	protein_coding
ENSG00000168237.18	691.941	-1.22899	0.30763	-3.99503	6.4686e-05	0.000552334	GLYCTK	protein_coding
ENSG00000010318.21	373.475	1.12259	0.285296	3.93482	8.32595e-05	0.000689172	PHF7	protein_coding
ENSG00000010319.6	1357.51	-2.211	0.26673	-8.28927	1.13943e-16	4.90796e-15	SEMA3G	protein_coding
ENSG00000114854.7	267.634	-3.14245	0.34785	-9.03392	1.65631e-19	8.62617e-18	TNNC1	protein_coding
ENSG00000168268.11	4895.64	-1.30444	0.295869	-4.40883	1.0393e-05	0.000105887	NT5DC2	protein_coding
ENSG00000163931.16	16589.4	1.41266	0.292047	4.83707	1.31765e-06	1.59814e-05	TKT	protein_coding
ENSG00000163947.11	3271.49	1.88342	0.236496	7.96387	1.66734e-15	6.36448e-14	ARHGEF3	protein_coding
ENSG00000168291.13	2591.8	-1.33086	0.243931	-5.45588	4.87309e-08	7.6593e-07	PDHB	protein_coding
ENSG00000168301.13	329.664	-1.74321	0.301811	-5.77583	7.65767e-09	1.372e-07	KCTD6	protein_coding
ENSG00000168306.13	500.656	-1.31357	0.291926	-4.49966	6.80637e-06	7.27024e-05	ACOX2	protein_coding
ENSG00000163637.13	143.675	2.26361	0.391163	5.78688	7.17053e-09	1.29486e-07	PRICKLE2	protein_coding
ENSG00000163638.13	43.1743	-1.58773	0.571853	-2.77646	0.00549548	0.0255994	ADAMTS9	protein_coding
ENSG00000144749.13	1598.39	-2.37352	0.261601	-9.07304	1.15746e-19	6.11676e-18	LRIG1	protein_coding
ENSG00000163376.11	383.588	-1.10894	0.328661	-3.37412	0.000740516	0.00472664	KBTBD8	protein_coding
ENSG00000241884.2	10.782	-3.22701	1.19562	-2.69901	0.00695452	0.0311338	AC114401.1	lincRNA
ENSG00000163377.16	82.1428	-1.89725	0.436602	-4.34549	1.38964e-05	0.000137407	FAM19A4	protein_coding
ENSG00000114541.15	206.266	-2.18584	0.337333	-6.47976	9.18689e-11	2.11847e-09	FRMD4B	protein_coding
ENSG00000243083.6	58.9862	-3.22677	0.552785	-5.8373	5.3052e-09	9.76956e-08	LINC00870	lincRNA
ENSG00000172986.12	260.264	-2.34069	0.321941	-7.27055	3.58034e-13	1.093e-11	GXYLT2	protein_coding
ENSG00000242741.1	35.3645	4.57521	0.824642	5.54812	2.88763e-08	4.71983e-07	LINC02005	lincRNA
ENSG00000240241.5	65.4766	4.01429	0.583471	6.88001	5.98502e-12	1.57978e-10	AC108752.1	lincRNA
ENSG00000114480.13	2012.89	2.23432	0.251093	8.89837	5.66704e-19	2.83973e-17	GBE1	protein_coding
ENSG00000241319.1	24.8142	2.52896	0.828882	3.05105	0.00228041	0.0122546	SETP6	processed_pseudogene
ENSG00000206538.9	68.9217	2.46517	0.500996	4.92054	8.63041e-07	1.09094e-05	VGLL3	protein_coding
ENSG00000175105.7	1225.5	2.84407	0.263629	10.7881	3.91608e-27	3.46863e-25	ZNF654	protein_coding
ENSG00000169379.15	457.271	-1.22694	0.280326	-4.37684	1.20411e-05	0.000120964	ARL13B	protein_coding
ENSG00000206712.1	55.2495	1.25231	0.498933	2.50998	0.0120737	0.0492881	RNU6-26P	snRNA
ENSG00000206535.8	198.25	-1.42858	0.327985	-4.35561	1.32695e-05	0.000131726	LNP1	protein_coding
ENSG00000181458.10	180.164	-1.28843	0.370236	-3.48002	0.000501369	0.0033489	TMEM45A	protein_coding
ENSG00000243701.6	125.849	3.12755	0.414813	7.53967	4.71178e-14	1.55341e-12	DUBR	lincRNA
ENSG00000114446.5	337.376	-1.30888	0.307026	-4.26308	2.01627e-05	0.000192849	IFT57	protein_coding
ENSG00000163507.14	2089.13	-1.1035	0.25771	-4.28195	1.85262e-05	0.000178924	CIP2A	protein_coding
ENSG00000240891.7	1203.29	3.4932	0.261534	13.3566	1.08395e-40	1.90676e-38	PLCXD2	protein_coding
ENSG00000176040.13	27.9493	2.84323	0.765592	3.71377	0.000204194	0.00152057	TMPRSS7	protein_coding
ENSG00000114529.12	235.519	2.93361	0.34429	8.52077	1.58499e-17	7.2229e-16	C3orf52	protein_coding
ENSG00000261488.1	26.8827	3.38067	0.77394	4.36812	1.25318e-05	0.000125044	TBILA	antisense
ENSG00000184307.15	721.882	-1.03988	0.273824	-3.79762	0.000146092	0.00113249	ZDHHC23	protein_coding
ENSG00000181722.16	1524.86	1.56969	0.245717	6.3882	1.67845e-10	3.74968e-09	ZBTB20	protein_coding
ENSG00000082701.15	2547.46	1.00473	0.243739	4.12213	3.75383e-05	0.000338571	GSK3B	protein_coding
ENSG00000242622.1	281.387	-1.11563	0.300708	-3.70999	0.000207265	0.00154116	AC092910.3	lincRNA
ENSG00000163428.4	2632.1	-1.4904	0.248243	-6.0038	1.92752e-09	3.74995e-08	LRRC58	protein_coding
ENSG00000121552.4	7069.4	10.5393	0.425554	24.766	2.08341e-135	1.04816e-131	CSTA	protein_coding
ENSG00000169087.11	305.172	1.04	0.295702	3.51704	0.000436393	0.00297251	HSPBAP1	protein_coding
ENSG00000273033.2	193.466	1.00353	0.335632	2.98998	0.00278999	0.0144945	LINC02035	lincRNA
ENSG00000121542.12	332.808	1.38442	0.314914	4.39618	1.10172e-05	0.000111479	SEC22A	protein_coding
ENSG00000280042.1	109.049	1.4214	0.39458	3.6023	0.000315414	0.00224258	AC022336.3	TEC
ENSG00000243986.2	47.931	1.7497	0.536015	3.26428	0.00109744	0.00660274	ENO1P3	processed_pseudogene
ENSG00000173702.7	459.349	-3.51033	0.352755	-9.9512	2.49172e-23	1.68947e-21	MUC13	protein_coding
ENSG00000171084.15	87.8368	1.09871	0.433529	2.53434	0.0112658	0.0466292	FAM86JP	transcribed_unprocessed_pseudogene
ENSG00000144908.13	1057.38	2.23888	0.308497	7.25737	3.94689e-13	1.19764e-11	ALDH1L1	protein_coding
ENSG00000070476.15	1855.62	1.17402	0.255461	4.59571	4.31275e-06	4.80883e-05	ZXDC	protein_coding
ENSG00000073111.14	4937.88	-2.13884	0.310202	-6.89499	5.38694e-12	1.43547e-10	MCM2	protein_coding
ENSG00000114631.11	724.991	-1.28048	0.299677	-4.27288	1.92964e-05	0.000185197	PODXL2	protein_coding
ENSG00000172780.16	232.726	1.40561	0.332779	4.22384	2.40175e-05	0.000226532	RAB43	protein_coding
ENSG00000172771.12	83.9177	-2.07239	0.456511	-4.53962	5.63568e-06	6.12907e-05	EFCAB12	protein_coding
ENSG00000129071.9	1084	-1.42053	0.275324	-5.15949	2.47617e-07	3.46816e-06	MBD4	protein_coding
ENSG00000163913.11	1028.67	-1.19825	0.268967	-4.45498	8.38997e-06	8.76816e-05	IFT122	protein_coding
ENSG00000251287.8	45.5604	3.88961	0.66105	5.88398	4.0052e-09	7.50193e-08	ALG1L2	protein_coding
ENSG00000248243.1	187.682	9.63018	1.45362	6.62494	3.47384e-11	8.40236e-10	LINC02014	lincRNA
ENSG00000244062.1	211.357	-1.47997	0.40341	-3.66865	0.000243838	0.00177841	AC080128.1	processed_pseudogene
ENSG00000144867.11	1562.33	-1.23703	0.2652	-4.66451	3.09355e-06	3.52119e-05	SRPRB	protein_coding
ENSG00000158234.12	533.91	-1.03363	0.273803	-3.77509	0.000159947	0.00122667	FAIM	protein_coding
ENSG00000248932.5	58.0523	1.41632	0.503424	2.81337	0.0049026	0.0233216	AC097103.2	antisense
ENSG00000114115.9	993.235	1.52883	0.270124	5.65974	1.516e-08	2.60662e-07	RBP1	protein_coding
ENSG00000163864.17	222.594	1.77335	0.326435	5.43249	5.55726e-08	8.65055e-07	NMNAT3	protein_coding
ENSG00000155893.13	449.151	-1.25537	0.277862	-4.51797	6.2436e-06	6.71761e-05	PXYLP1	protein_coding
ENSG00000069849.11	3407.69	-1.431	0.261512	-5.47203	4.44922e-08	7.04343e-07	ATP1B3	protein_coding
ENSG00000163710.9	219.541	-3.59803	0.372429	-9.66099	4.41581e-22	2.71588e-20	PCOLCE2	protein_coding
ENSG00000188582.8	331.74	-1.72953	0.30236	-5.72011	1.06453e-08	1.86609e-07	PAQR9	protein_coding
ENSG00000241570.8	22.2484	-2.92299	0.812434	-3.59781	0.000320902	0.00227709	PAQR9-AS1	antisense
ENSG00000114698.15	200.568	-1.04992	0.335342	-3.1309	0.0017427	0.00976119	PLSCR4	protein_coding
ENSG00000144891.17	55.155	-3.70297	0.606976	-6.10069	1.05614e-09	2.14252e-08	AGTR1	protein_coding
ENSG00000243885.1	113.145	-1.58255	0.401876	-3.93792	8.21923e-05	0.00068146	AC108751.4	lincRNA
ENSG00000169903.6	19.6137	-2.25942	0.812382	-2.78123	0.00541532	0.0253295	TM4SF4	protein_coding
ENSG00000206199.10	87.6732	3.09619	0.495213	6.25224	4.04609e-10	8.6991e-09	ANKUB1	protein_coding
ENSG00000243944.5	16.7287	-2.42882	0.890329	-2.72801	0.0063718	0.0289423	AC117386.2	antisense
ENSG00000120742.11	4539.91	-1.05471	0.236888	-4.45235	8.49353e-06	8.86534e-05	SERP1	protein_coding
ENSG00000138271.5	95.2385	8.6437	1.47702	5.85211	4.85373e-09	9.01739e-08	GPR87	protein_coding
ENSG00000240602.7	100.334	-1.29862	0.424448	-3.05954	0.00221676	0.0119534	AADACP1	transcribed_unprocessed_pseudogene
ENSG00000181467.4	3880.75	1.59927	0.238923	6.69366	2.17658e-11	5.38897e-10	RAP2B	protein_coding
ENSG00000114805.17	227.537	-1.9553	0.321692	-6.07818	1.21556e-09	2.44423e-08	PLCH1	protein_coding
ENSG00000168811.7	31.7751	-2.61129	0.685734	-3.80803	0.000140079	0.00109059	IL12A	protein_coding
ENSG00000180044.5	4.97209	-5.70929	2.06083	-2.77038	0.00559916	0.0259913	C3orf80	protein_coding
ENSG00000229320.3	156.366	-1.23459	0.350662	-3.52075	0.000430329	0.00293897	KRT8P12	transcribed_processed_pseudogene
ENSG00000163590.14	240.441	-2.62272	0.332773	-7.8814	3.23724e-15	1.20107e-13	PPM1L	protein_coding
ENSG00000169064.12	28.1702	3.0378	0.756027	4.01811	5.86661e-05	0.000506955	ZBBX	protein_coding
ENSG00000163536.12	143.457	-2.59203	0.386049	-6.71425	1.89036e-11	4.70813e-10	SERPINI1	protein_coding
ENSG00000184378.3	20.5613	-2.63731	0.820599	-3.21388	0.00130954	0.00767507	ACTRT3	protein_coding
ENSG00000013297.11	255.585	-4.38396	0.3705	-11.8326	2.64966e-32	3.01594e-30	CLDN11	protein_coding
ENSG00000163584.18	675.359	-1.04073	0.272622	-3.81749	0.000134819	0.00105453	RPL22L1	protein_coding
ENSG00000163577.8	932.36	-1.33053	0.276539	-4.81136	1.49905e-06	1.80251e-05	EIF5A2	protein_coding
ENSG00000163581.14	625.383	-1.35293	0.267057	-5.06607	4.06122e-07	5.48069e-06	SLC2A2	protein_coding
ENSG00000154310.17	967.5	-1.57307	0.254276	-6.18648	6.15206e-10	1.29178e-08	TNIK	protein_coding
ENSG00000279673.1	36.907	-4.48431	0.817814	-5.48329	4.17483e-08	6.65091e-07	AC092919.2	TEC
ENSG00000121858.11	126.945	1.44515	0.387381	3.73056	0.000191052	0.0014346	TNFSF10	protein_coding
ENSG00000114346.13	5573.08	-1.37034	0.275397	-4.97586	6.49594e-07	8.45345e-06	ECT2	protein_coding
ENSG00000231574.5	97.6965	-1.09776	0.3999	-2.74508	0.00604961	0.0277444	LINC02015	lincRNA
ENSG00000172667.11	8490.78	3.8535	0.242856	15.8674	1.06603e-56	3.35199e-54	ZMAT3	protein_coding
ENSG00000136518.17	1739.26	-1.02782	0.255105	-4.02902	5.60088e-05	0.000485828	ACTL6A	protein_coding
ENSG00000284862.2	19.1072	3.63262	0.9456	3.84161	0.000122232	0.000969337	CCDC39	protein_coding
ENSG00000078081.8	195.033	4.30498	0.396388	10.8605	1.77711e-27	1.59654e-25	LAMP3	protein_coding
ENSG00000284753.1	227.188	-1.09825	0.354175	-3.10086	0.00192959	0.0106258	EEF1AKMT4	protein_coding
ENSG00000163888.4	65.2175	-2.05653	0.508002	-4.04827	5.15977e-05	0.000451929	CAMK2N2	protein_coding
ENSG00000114859.16	486.827	-1.3611	0.318652	-4.27144	1.94217e-05	0.000186328	CLCN2	protein_coding
ENSG00000163882.9	1917.47	1.05894	0.257601	4.11077	3.94346e-05	0.000354025	POLR2H	protein_coding
ENSG00000187068.3	220.545	-1.48222	0.327665	-4.52357	6.08057e-06	6.55622e-05	C3orf70	protein_coding
ENSG00000113790.11	1459.49	-1.03778	0.247371	-4.19524	2.72585e-05	0.000253691	EHHADH	protein_coding
ENSG00000163900.11	2034.97	1.16197	0.265834	4.37104	1.23654e-05	0.000123777	TMEM41A	protein_coding
ENSG00000286086.1	39.7749	2.14547	0.645174	3.32541	0.000882887	0.00549185	AC099661.1	lincRNA
ENSG00000058866.15	331.796	-1.23635	0.291825	-4.23662	2.26908e-05	0.000214824	DGKG	protein_coding
ENSG00000226859.1	63.8792	9.51543	1.51276	6.2901	3.1726e-10	6.89774e-09	LINC02051	lincRNA
ENSG00000145192.13	58017.1	-1.47226	0.297984	-4.94073	7.78318e-07	9.97381e-06	AHSG	protein_coding
ENSG00000163918.10	1215.48	-1.19036	0.268547	-4.43258	9.31118e-06	9.61506e-05	RFC4	protein_coding
ENSG00000181092.10	36.3966	2.80771	0.645883	4.34709	1.37959e-05	0.000136628	ADIPOQ	protein_coding
ENSG00000145012.13	5613.47	1.10496	0.23795	4.64366	3.42283e-06	3.87495e-05	LPP	protein_coding
ENSG00000090530.10	33.4584	2.03788	0.673658	3.02509	0.00248558	0.0131576	P3H2	protein_coding
ENSG00000231047.1	33.0047	1.61426	0.633906	2.54652	0.0108802	0.0452905	GCNT1P3	processed_pseudogene
ENSG00000229155.1	6.3679	-6.06078	1.90651	-3.17899	0.00147791	0.00849758	LINC02038	lincRNA
ENSG00000230102.7	54.5774	2.75336	0.535754	5.13922	2.75874e-07	3.82981e-06	LINC02028	processed_transcript
ENSG00000178772.7	501.382	-1.64035	0.336319	-4.87735	1.07523e-06	1.33435e-05	CPN2	protein_coding
ENSG00000185112.5	664.358	1.64292	0.289301	5.67891	1.35555e-08	2.34679e-07	FAM43A	protein_coding
ENSG00000235897.1	80.1723	3.16068	0.489784	6.45322	1.09495e-10	2.50624e-09	TM4SF19-AS1	antisense
ENSG00000163975.12	1143.14	1.3719	0.325532	4.21432	2.50529e-05	0.000235767	MELTF	protein_coding
ENSG00000161267.12	814.78	2.22186	0.288217	7.70898	1.26829e-14	4.42071e-13	BDH1	protein_coding
ENSG00000273238.2	22.5078	-4.81266	1.0764	-4.47105	7.78366e-06	8.213e-05	TMEM271	protein_coding
ENSG00000283183.1	32.0874	-4.28213	0.829949	-5.15951	2.47591e-07	3.46816e-06	AC116565.1	lincRNA
ENSG00000185619.18	2314.37	1.22131	0.285541	4.27718	1.89278e-05	0.000182215	PCGF3	protein_coding
ENSG00000127419.17	260.906	1.87622	0.368595	5.09019	3.57707e-07	4.8586e-06	TMEM175	protein_coding
ENSG00000145214.14	410.569	1.0288	0.340186	3.02424	0.00249258	0.0131792	DGKQ	protein_coding
ENSG00000127415.13	98.7157	2.66144	0.449205	5.92477	3.12726e-09	5.9326e-08	IDUA	protein_coding
ENSG00000159674.12	736.876	-1.58473	0.318785	-4.97116	6.65548e-07	8.62982e-06	SPON2	protein_coding
ENSG00000163945.16	1053.05	1.11639	0.275044	4.05896	4.92921e-05	0.00043385	UVSSA	protein_coding
ENSG00000163950.13	2002.05	-1.45482	0.245913	-5.91597	3.29927e-09	6.25419e-08	SLBP	protein_coding
ENSG00000168936.11	725.357	2.52204	0.309386	8.15178	3.58612e-16	1.46206e-14	TMEM129	protein_coding
ENSG00000087266.16	1110.88	1.0106	0.313842	3.2201	0.00128147	0.00754221	SH3BP2	protein_coding
ENSG00000249673.6	1409.81	2.13408	0.257409	8.29061	1.12665e-16	4.86123e-15	NOP14-AS1	antisense
ENSG00000109758.8	302.148	1.47541	0.393662	3.74792	0.000178308	0.00134619	HGFAC	protein_coding
ENSG00000163956.12	8354.08	1.54126	0.285401	5.40031	6.65266e-08	1.02353e-06	LRPAP1	protein_coding
ENSG00000270090.5	8.16299	-3.84329	1.50915	-2.54667	0.0108757	0.0452794	AL590235.1	lincRNA
ENSG00000250986.1	135.478	2.23327	0.391696	5.70153	1.18738e-08	2.0742e-07	LINC02600	lincRNA
ENSG00000251271.3	52.7835	9.24116	1.52337	6.06627	1.30911e-09	2.62396e-08	ALG1L7P	unprocessed_pseudogene
ENSG00000145220.14	1398.04	-1.3254	0.256853	-5.16015	2.4675e-07	3.45987e-06	LYAR	protein_coding
ENSG00000168824.14	195.112	5.66657	0.487345	11.6274	2.98995e-31	3.21419e-29	NSG1	protein_coding
ENSG00000246526.2	288.754	2.188	0.346645	6.31192	2.75593e-10	6.03879e-09	LINC002481	lincRNA
ENSG00000279859.2	55.8757	2.70671	0.551603	4.90699	9.24849e-07	1.16381e-05	AC093323.2	TEC
ENSG00000163993.7	3530.44	1.86258	0.267381	6.96604	3.25998e-12	8.89422e-11	S100P	protein_coding
ENSG00000184985.16	1202.07	8.50171	0.463786	18.3311	4.67374e-75	3.09389e-72	SORCS2	protein_coding
ENSG00000229924.3	34.7616	8.63861	1.55341	5.56107	2.68131e-08	4.41416e-07	FAM90A26	protein_coding
ENSG00000109667.12	2369.41	1.19067	0.2533	4.70062	2.59368e-06	2.99285e-05	SLC2A9	protein_coding
ENSG00000250613.1	9.58935	4.30612	1.45119	2.9673	0.00300432	0.0154358	AC110768.2	processed_pseudogene
ENSG00000247624.6	26.5171	2.80401	0.730556	3.83818	0.00012395	0.000980997	CPEB2-DT	lincRNA
ENSG00000137449.15	485.156	1.3151	0.29845	4.40644	1.05082e-05	0.000106845	CPEB2	protein_coding
ENSG00000048342.16	395.589	-1.07327	0.292983	-3.66325	0.000249032	0.00181314	CC2D2A	protein_coding
ENSG00000007062.11	849.371	-2.2885	0.269457	-8.49303	2.0132e-17	9.12471e-16	PROM1	protein_coding
ENSG00000109610.6	11.3633	-5.43347	1.70415	-3.18837	0.00143078	0.00827577	SOD3	protein_coding
ENSG00000181982.18	51.534	-1.78153	0.520762	-3.42101	0.000623892	0.0040658	CCDC149	protein_coding
ENSG00000281501.1	187.178	-1.38122	0.378423	-3.64994	0.000262305	0.00189988	SEPSECS-AS1	antisense
ENSG00000157765.13	79.9527	-3.43592	0.497246	-6.90989	4.85026e-12	1.30351e-10	SLC34A2	protein_coding
ENSG00000091490.11	256.544	1.4694	0.308935	4.75635	1.97124e-06	2.32473e-05	SEL1L3	protein_coding
ENSG00000047365.12	30.8995	-1.92797	0.649922	-2.96647	0.00301244	0.015468	ARAP2	protein_coding
ENSG00000249863.2	101.36	1.32094	0.397518	3.32298	0.000890612	0.00553205	AC021106.1	processed_pseudogene
ENSG00000134962.7	513.726	-1.26382	0.292918	-4.31456	1.59919e-05	0.000156528	KLB	protein_coding
ENSG00000163694.15	1927.57	2.50132	0.243967	10.2527	1.15108e-24	8.69532e-23	RBM47	protein_coding
ENSG00000263642.1	15.5519	3.03199	0.973048	3.11598	0.00183337	0.0101852	MIR4802	miRNA
ENSG00000163697.17	3250.37	1.80744	0.250195	7.22415	5.04252e-13	1.50647e-11	APBB2	protein_coding
ENSG00000145246.13	1187.69	-2.96458	0.28267	-10.4878	9.82978e-26	8.02818e-24	ATP10D	protein_coding
ENSG00000163293.12	647.2	2.12296	0.276277	7.68418	1.53982e-14	5.31331e-13	NIPAL1	protein_coding
ENSG00000249828.2	21.4255	6.49312	1.59761	4.06426	4.81853e-05	0.000424682	AC118282.3	processed_pseudogene
ENSG00000250016.2	8.36278	5.11608	1.78311	2.86919	0.00411519	0.0201828	SNX18P23	processed_pseudogene
ENSG00000237961.4	18.0322	4.59013	1.14739	4.00048	6.32148e-05	0.000541426	AC118282.1	processed_pseudogene
ENSG00000248583.1	1241.07	9.77724	0.647416	15.1019	1.57267e-51	4.39562e-49	AC119751.3	unprocessed_pseudogene
ENSG00000232471.3	8.64272	5.13496	1.77173	2.89827	0.00375222	0.0186507	AC119751.1	unprocessed_pseudogene
ENSG00000250753.2	229.101	9.91716	1.45454	6.81807	9.22712e-12	2.37816e-10	AC119751.4	processed_pseudogene
ENSG00000249337.2	13.6136	4.76123	1.33485	3.56687	0.000361274	0.0025209	SNX18P25	processed_pseudogene
ENSG00000163071.11	1307.87	6.98892	0.336851	20.7478	1.28393e-95	1.40423e-92	SPATA18	protein_coding
ENSG00000226950.6	1757.4	-1.12374	0.269073	-4.17634	2.96232e-05	0.000272757	DANCR	processed_transcript
ENSG00000134853.12	29.4688	-2.20689	0.689083	-3.20265	0.00136168	0.00793447	PDGFRA	protein_coding
ENSG00000128039.11	214.078	-1.16729	0.345767	-3.37593	0.000735674	0.00469812	SRD5A3	protein_coding
ENSG00000128059.8	2069.01	-1.12785	0.246279	-4.57955	4.65971e-06	5.14835e-05	PPAT	protein_coding
ENSG00000128050.8	8148.88	-1.43979	0.264187	-5.44988	5.0404e-08	7.89977e-07	PAICS	protein_coding
ENSG00000163453.11	593.318	6.88762	0.414584	16.6133	5.5804e-62	2.12689e-59	IGFBP7	protein_coding
ENSG00000236562.4	44.5525	-1.90352	0.589083	-3.23133	0.00123217	0.00730332	AC116049.1	processed_pseudogene
ENSG00000162840.4	38.9618	3.35647	0.680436	4.93282	8.10488e-07	1.0323e-05	MT2P1	processed_pseudogene
ENSG00000135220.11	852.385	2.11229	0.277451	7.61319	2.67421e-14	9.0295e-13	UGT2A3	protein_coding
ENSG00000251685.3	231.506	2.48031	0.404227	6.13594	8.46592e-10	1.74129e-08	UGT2B27P	unprocessed_pseudogene
ENSG00000171234.14	1399.49	1.30782	0.264441	4.94561	7.59046e-07	9.74671e-06	UGT2B7	protein_coding
ENSG00000248763.2	160.625	2.0264	0.398321	5.08735	3.63102e-07	4.92921e-06	AC111000.2	unprocessed_pseudogene
ENSG00000156096.14	106.739	-3.88327	0.520087	-7.46657	8.23136e-14	2.66486e-12	UGT2B4	protein_coding
ENSG00000109205.16	158.049	-1.18534	0.369318	-3.20955	0.00132942	0.00778073	ODAM	protein_coding
ENSG00000156136.10	750.824	-1.1525	0.261359	-4.40964	1.03545e-05	0.00010558	DCK	protein_coding
ENSG00000163631.17	62283	3.68163	0.297918	12.3578	4.41914e-35	5.61889e-33	ALB	protein_coding
ENSG00000081051.7	113712	-1.59081	0.274865	-5.78758	7.14063e-09	1.29132e-07	AFP	protein_coding
ENSG00000079557.5	39.2765	-2.44562	0.660845	-3.70075	0.000214967	0.00159184	AFM	protein_coding
ENSG00000163735.7	261.83	-6.2673	0.50337	-12.4507	1.38659e-35	1.80723e-33	CXCL5	protein_coding
ENSG00000081041.9	17.4017	-3.35031	0.956863	-3.50134	0.00046292	0.00312779	CXCL2	protein_coding
ENSG00000163738.18	363.34	-1.61996	0.288511	-5.61489	1.96686e-08	3.30945e-07	MTHFD2L	protein_coding
ENSG00000138744.15	340.326	-1.495	0.29887	-5.00216	5.6692e-07	7.45083e-06	NAAA	protein_coding
ENSG00000138771.16	144.661	3.0143	0.39313	7.66745	1.75448e-14	6.03748e-13	SHROOM3	protein_coding
ENSG00000138758.11	4000.87	-1.2607	0.275787	-4.57129	4.84735e-06	5.33166e-05	SEPT11	protein_coding
ENSG00000249307.6	147.836	4.3618	0.487431	8.94855	3.60193e-19	1.8321e-17	LINC01088	processed_transcript
ENSG00000138670.17	219.907	-3.14651	0.360142	-8.73688	2.39641e-18	1.15041e-16	RASGEF1B	protein_coding
ENSG00000272677.1	42.4804	-1.70393	0.568589	-2.99677	0.00272857	0.0142374	AC124016.1	antisense
ENSG00000145287.10	736.734	3.1369	0.269565	11.6369	2.67607e-31	2.88912e-29	PLAC8	protein_coding
ENSG00000235043.3	260.934	-1.16913	0.332866	-3.51232	0.000444216	0.00301926	TECRP1	processed_pseudogene
ENSG00000198189.11	3137.41	-1.47753	0.265418	-5.56679	2.59471e-08	4.28269e-07	HSD17B11	protein_coding
ENSG00000118777.12	1232.67	-1.87698	0.302099	-6.21314	5.19347e-10	1.10153e-08	ABCG2	protein_coding
ENSG00000163644.15	446.447	-1.32171	0.292123	-4.52451	6.05355e-06	6.53047e-05	PPM1K	protein_coding
ENSG00000138642.14	66.9784	-2.17349	0.496793	-4.37504	1.21412e-05	0.000121726	HERC6	protein_coding
ENSG00000251095.6	3956.76	9.61982	1.30724	7.35887	1.85467e-13	5.84639e-12	AC097478.1	antisense
ENSG00000274238.1	11.7181	7.06541	1.74134	4.05745	4.96114e-05	0.000436202	AC097478.2	antisense
ENSG00000246090.6	348.716	1.40234	0.329991	4.24962	2.1413e-05	0.000203416	AP002026.1	antisense
ENSG00000198099.8	326.536	-1.40349	0.309185	-4.53931	5.64388e-06	6.13534e-05	ADH4	protein_coding
ENSG00000138823.13	1624.42	-4.21001	0.346676	-12.1439	6.17864e-34	7.40113e-32	MTTP	protein_coding
ENSG00000164032.12	7540.13	-1.40008	0.24668	-5.6757	1.38126e-08	2.38801e-07	H2AFZ	protein_coding
ENSG00000138821.13	93.5714	-2.5482	0.461666	-5.51958	3.39816e-08	5.48657e-07	SLC39A8	protein_coding
ENSG00000164038.15	825.811	-1.09727	0.272117	-4.03235	5.52213e-05	0.000479824	SLC9B2	protein_coding
ENSG00000168769.13	1759.17	1.56404	0.288362	5.42388	5.83178e-08	9.02759e-07	TET2	protein_coding
ENSG00000164023.14	176.802	-2.66544	0.376564	-7.07833	1.45903e-12	4.13309e-11	SGMS2	protein_coding
ENSG00000138796.16	1229.22	-1.04507	0.269638	-3.87583	0.000106263	0.000856744	HADH	protein_coding
ENSG00000138802.11	2505.31	1.31115	0.245891	5.33226	9.69975e-08	1.45119e-06	SEC24B	protein_coding
ENSG00000005059.16	230.029	-2.23837	0.326515	-6.85535	7.11381e-12	1.86016e-10	MCUB	protein_coding
ENSG00000170522.9	1135.74	-2.55975	0.264608	-9.67376	3.89799e-22	2.42109e-20	ELOVL6	protein_coding
ENSG00000174749.6	217.948	-1.13763	0.317579	-3.58219	0.000340729	0.0023975	FAM241A	protein_coding
ENSG00000145365.11	223.201	-2.97982	0.352391	-8.456	2.76698e-17	1.24292e-15	TIFA	protein_coding
ENSG00000251155.2	30.2331	-4.44367	0.909313	-4.88685	1.02463e-06	1.28041e-05	SEPT14P4	processed_pseudogene
ENSG00000145384.3	49.1427	-1.80735	0.545149	-3.31533	0.000915337	0.00566568	FABP2	protein_coding
ENSG00000164109.14	2137.71	-1.16087	0.240144	-4.83407	1.33771e-06	1.6209e-05	MAD2L1	protein_coding
ENSG00000164111.15	7688.66	-1.04628	0.256651	-4.07667	4.56857e-05	0.000404087	ANXA5	protein_coding
ENSG00000196159.11	115.543	-2.14035	0.405901	-5.27309	1.34144e-07	1.97912e-06	FAT4	protein_coding
ENSG00000164066.13	1365.22	1.08519	0.270252	4.01548	5.93245e-05	0.000511766	INTU	protein_coding
ENSG00000164070.12	3940.28	3.32418	0.251535	13.2156	7.13198e-40	1.1803e-37	HSPA4L	protein_coding
ENSG00000282855.1	47.096	4.11558	0.66918	6.15018	7.73932e-10	1.60762e-08	AC093591.3	processed_pseudogene
ENSG00000142731.11	1291.51	-1.02667	0.309971	-3.31217	0.000925762	0.00571614	PLK4	protein_coding
ENSG00000251432.6	56.3381	2.09919	0.522088	4.02076	5.80097e-05	0.0005018	LINC02615	lincRNA
ENSG00000077684.16	1049.5	-1.72898	0.252489	-6.84775	7.50198e-12	1.95354e-10	JADE1	protein_coding
ENSG00000246876.6	31.6202	-2.0378	0.674155	-3.02276	0.00250485	0.0132289	LINC02466	lincRNA
ENSG00000248307.5	16.2003	-2.55751	0.930013	-2.74997	0.00596003	0.0273785	LINC00616	lincRNA
ENSG00000151012.13	1444.32	-2.4805	0.266668	-9.30184	1.38032e-20	7.75045e-19	SLC7A11	protein_coding
ENSG00000145391.13	272.59	-2.08448	0.314515	-6.6276	3.41181e-11	8.26026e-10	SETD7	protein_coding
ENSG00000153132.13	271.208	-2.91925	0.348922	-8.36648	5.93651e-17	2.61072e-15	CLGN	protein_coding
ENSG00000164136.17	25.9278	-3.34349	0.789663	-4.23407	2.29502e-05	0.000217116	IL15	protein_coding
ENSG00000151612.16	438.774	1.13842	0.284805	3.99719	6.40995e-05	0.000547884	ZNF827	protein_coding
ENSG00000164167.12	443.973	-1.16341	0.284603	-4.08783	4.35422e-05	0.000387307	LSM6	protein_coding
ENSG00000071205.11	178.032	2.44472	0.353606	6.91369	4.72206e-12	1.27177e-10	ARHGAP10	protein_coding
ENSG00000164142.16	354.685	-2.03762	0.299292	-6.80814	9.88692e-12	2.5404e-10	FAM160A1	protein_coding
ENSG00000109670.15	1903.61	1.4225	0.25032	5.68271	1.32576e-08	2.29996e-07	FBXW7	protein_coding
ENSG00000170006.12	80.1597	1.47164	0.441344	3.33445	0.000854692	0.00534023	TMEM154	protein_coding
ENSG00000137460.8	35.8002	-3.83857	0.736548	-5.21157	1.87248e-07	2.69002e-06	FHDC1	protein_coding
ENSG00000121210.16	599.96	-1.54338	0.268267	-5.75317	8.75836e-09	1.55481e-07	TMEM131L	protein_coding
ENSG00000171564.11	1058.34	-1.84118	0.275387	-6.68578	2.29697e-11	5.67587e-10	FGB	protein_coding
ENSG00000171560.15	4304.98	-1.88025	0.30296	-6.20627	5.42568e-10	1.14595e-08	FGA	protein_coding
ENSG00000171557.16	3560.87	-2.35288	0.31628	-7.43923	1.01272e-13	3.26183e-12	FGG	protein_coding
ENSG00000145431.11	385.459	1.86442	0.288252	6.46802	9.92971e-11	2.2832e-09	PDGFC	protein_coding
ENSG00000248429.5	1202.81	1.35282	0.301963	4.4801	7.46081e-06	7.90217e-05	FAM198B-AS1	antisense
ENSG00000251073.1	95.5844	1.24755	0.424556	2.93848	0.00329827	0.0167477	NUDT19P5	processed_pseudogene
ENSG00000205208.5	1020.02	-1.80162	0.255537	-7.05034	1.7848e-12	4.99405e-11	C4orf46	protein_coding
ENSG00000168843.14	46.2188	2.41608	0.603394	4.00415	6.22418e-05	0.000534366	FSTL5	protein_coding
ENSG00000273449.1	96.3315	1.74173	0.437655	3.97969	6.90043e-05	0.00058484	AC093788.1	lincRNA
ENSG00000109472.14	10804.5	1.27321	0.232868	5.4675	4.56427e-08	7.21648e-07	CPE	protein_coding
ENSG00000207559.1	69.9646	2.08551	0.473048	4.40867	1.04009e-05	0.000105925	MIR578	miRNA
ENSG00000198948.12	194.288	1.41463	0.36417	3.88452	0.000102531	0.000830111	MFAP3L	protein_coding
ENSG00000109674.4	453.107	-1.33639	0.288511	-4.632	3.62147e-06	4.07962e-05	NEIL3	protein_coding
ENSG00000168556.7	362.776	-1.06598	0.300508	-3.54724	0.000389284	0.00268727	ING2	protein_coding
ENSG00000151725.12	1433.06	-1.08937	0.300418	-3.62618	0.000287648	0.00206442	CENPU	protein_coding
ENSG00000109771.15	73.7233	1.64704	0.451778	3.6457	0.00026667	0.00192706	LRP2BP	protein_coding
ENSG00000088926.13	1548.6	-1.56319	0.259657	-6.02022	1.74179e-09	3.40971e-08	F11	protein_coding
ENSG00000224807.5	137.887	8.17564	1.08468	7.5374	4.79433e-14	1.57855e-12	DUX4L9	unprocessed_pseudogene
ENSG00000073578.17	1626.02	1.2621	0.268268	4.70463	2.5433e-06	2.94417e-05	SDHA	protein_coding
ENSG00000286001.1	43.353	2.32298	0.726152	3.19903	0.00137892	0.00801452	AC021087.5	protein_coding
ENSG00000066230.11	17.6784	2.52039	0.858255	2.93664	0.00331791	0.0168304	SLC9A3	protein_coding
ENSG00000225138.7	99.5703	1.29206	0.446517	2.89365	0.00380792	0.0188783	SLC9A3-AS1	processed_transcript
ENSG00000271781.1	73.6894	1.81253	0.48109	3.76754	0.000164865	0.00125857	AC026740.1	antisense
ENSG00000188818.12	256.235	-1.90652	0.384403	-4.95968	7.06095e-07	9.10862e-06	ZDHHC11	protein_coding
ENSG00000071539.14	1358.85	-1.53466	0.250063	-6.13708	8.40506e-10	1.73019e-08	TRIP13	protein_coding
ENSG00000145506.13	330.283	4.91122	0.369595	13.2881	2.71443e-40	4.55211e-38	NKD2	protein_coding
ENSG00000113504.21	1285.38	1.15028	0.291916	3.94043	8.13372e-05	0.000675483	SLC12A7	protein_coding
ENSG00000174358.16	18.9376	-4.12875	1.02859	-4.01398	5.97035e-05	0.000514329	SLC6A19	protein_coding
ENSG00000164362.19	257.075	-1.55641	0.352915	-4.41016	1.03297e-05	0.000105413	TERT	protein_coding
ENSG00000153395.10	1472.36	1.71865	0.272619	6.3042	2.89693e-10	6.32572e-09	LPCAT1	protein_coding
ENSG00000215218.4	465.865	7.94075	0.583408	13.611	3.44672e-42	6.47032e-40	UBE2QL1	protein_coding
ENSG00000145545.12	1029.75	-1.48334	0.252928	-5.86466	4.50052e-09	8.37976e-08	SRD5A1	protein_coding
ENSG00000271980.1	18.9828	5.31309	1.27097	4.18034	2.91075e-05	0.0002685	AC012640.4	antisense
ENSG00000271715.1	9.3143	4.17945	1.47563	2.83232	0.0046212	0.0222226	AC012640.3	lincRNA
ENSG00000164237.9	3728.69	4.75687	0.253798	18.7427	2.21957e-78	1.59524e-75	CMBL	protein_coding
ENSG00000252341.1	10.8624	5.4737	1.70154	3.21691	0.00129581	0.0076159	RF00019	misc_RNA
ENSG00000164236.12	77.1363	-2.095	0.497182	-4.21375	2.51169e-05	0.000236193	ANKRD33B	protein_coding
ENSG00000145569.6	339.789	1.01673	0.290613	3.49857	0.000467768	0.00315462	OTULINL	protein_coding
ENSG00000261360.1	82.7096	1.86274	0.460889	4.04163	5.30807e-05	0.000463305	AC010491.1	antisense
ENSG00000040731.10	18.0916	3.22562	1.0567	3.05253	0.0022692	0.0122074	CDH10	protein_coding
ENSG00000250337.6	5584.13	5.35509	0.256483	20.8789	8.32082e-97	1.04655e-93	PURPL	lincRNA
ENSG00000242110.8	111.649	-1.24202	0.411359	-3.01931	0.00253352	0.0133523	AMACR	protein_coding
ENSG00000168724.16	2404.89	1.05721	0.254944	4.14684	3.37094e-05	0.000308125	DNAJC21	protein_coding
ENSG00000113494.17	705.013	-1.63387	0.294102	-5.55544	2.76919e-08	4.54397e-07	PRLR	protein_coding
ENSG00000145604.15	1249.76	-2.41299	0.260263	-9.27136	1.83788e-20	1.0251e-18	SKP2	protein_coding
ENSG00000113569.16	4452.52	-1.21782	0.271659	-4.4829	7.36357e-06	7.82864e-05	NUP155	protein_coding
ENSG00000168621.15	3752.16	2.40035	0.248439	9.66173	4.38405e-22	2.70296e-20	GDNF	protein_coding
ENSG00000248461.2	277.741	-2.13664	0.393836	-5.42521	5.78875e-08	8.97756e-07	LINC02119	lincRNA
ENSG00000251257.2	17.0056	5.15314	1.29057	3.99292	6.52634e-05	0.000556509	AC010457.1	antisense
ENSG00000145623.13	4865.57	1.9576	0.252244	7.76074	8.44329e-15	2.98648e-13	OSMR	protein_coding
ENSG00000153071.15	226.009	-1.60793	0.343005	-4.68777	2.76198e-06	3.1696e-05	DAB2	protein_coding
ENSG00000171522.6	32.7536	-3.10806	0.703604	-4.41734	9.99233e-06	0.000102302	PTGER4	protein_coding
ENSG00000132357.14	35.0694	-1.9254	0.635652	-3.02902	0.00245346	0.0130098	CARD6	protein_coding
ENSG00000112936.18	38.4486	-3.37968	0.707584	-4.77637	1.7849e-06	2.11689e-05	C7	protein_coding
ENSG00000083720.13	120.129	-1.55309	0.400072	-3.88203	0.000103589	0.000838144	OXCT1	protein_coding
ENSG00000112972.15	3066.53	-1.59353	0.261714	-6.08882	1.13748e-09	2.2964e-08	HMGCS1	protein_coding
ENSG00000251141.5	28.7902	-1.69942	0.661215	-2.57015	0.0101655	0.0428546	MRPS30-DT	antisense
ENSG00000151883.18	83.1974	-2.37755	0.488685	-4.86519	1.14346e-06	1.40861e-05	PARP8	protein_coding
ENSG00000213949.9	1813.69	-2.33176	0.282913	-8.24195	1.69432e-16	7.17519e-15	ITGA1	protein_coding
ENSG00000286048.1	68.5753	2.93051	0.522425	5.60945	2.02976e-08	3.39711e-07	AC008966.3	antisense
ENSG00000247796.2	158.248	1.38346	0.348905	3.96514	7.33522e-05	0.000617528	AC008966.1	antisense
ENSG00000134363.12	3566.84	-1.00326	0.248373	-4.03932	5.36075e-05	0.000467416	FST	protein_coding
ENSG00000234602.7	18.6969	-3.2297	0.950866	-3.39659	0.000682308	0.00439638	MCIDAS	protein_coding
ENSG00000152669.9	34.515	-3.10878	0.707997	-4.39096	1.12854e-05	0.000113961	CCNO	protein_coding
ENSG00000227908.3	46.1343	-1.50475	0.546601	-2.75292	0.0059067	0.0271755	AC016596.1	antisense
ENSG00000237705.1	14.1906	2.46581	0.961458	2.56466	0.0103278	0.043386	AC008937.2	antisense
ENSG00000145632.15	1659.55	5.28189	0.267384	19.754	7.41607e-87	7.17504e-84	PLK2	protein_coding
ENSG00000152931.7	835.197	-1.58995	0.262485	-6.05731	1.38414e-09	2.75677e-08	PART1	lincRNA
ENSG00000035499.13	1524.14	-1.03547	0.25304	-4.09213	4.27437e-05	0.000380608	DEPDC1B	protein_coding
ENSG00000164181.14	434.141	-1.80798	0.293803	-6.15372	7.56839e-10	1.57341e-08	ELOVL7	protein_coding
ENSG00000251682.1	80.5481	1.11861	0.429243	2.60601	0.00916038	0.0392814	AC122718.2	processed_pseudogene
ENSG00000049192.15	779.846	2.12934	0.268144	7.94103	2.00516e-15	7.58493e-14	ADAMTS6	protein_coding
ENSG00000069020.18	3719.4	3.81863	0.246477	15.4928	3.87774e-54	1.1212e-51	MAST4	protein_coding
ENSG00000248803.1	51.0992	6.14119	0.972582	6.31432	2.71359e-10	5.9512e-09	AC092349.1	processed_pseudogene
ENSG00000249057.1	56.2168	5.55352	0.822336	6.75334	1.44475e-11	3.64155e-10	MAST4-IT1	sense_intronic
ENSG00000153044.10	634.532	-1.27369	0.272167	-4.67981	2.87143e-06	3.28626e-05	CENPH	protein_coding
ENSG00000183323.12	540.209	1.51694	0.269958	5.61918	1.9187e-08	3.24361e-07	CCDC125	protein_coding
ENSG00000152939.16	2658.72	1.63031	0.243875	6.68504	2.30859e-11	5.69898e-10	MARVELD2	protein_coding
ENSG00000205571.13	989.938	1.06966	0.251818	4.24776	2.15915e-05	0.000205034	SMN2	protein_coding
ENSG00000271926.1	20.6278	3.26654	0.891859	3.66262	0.000249647	0.00181604	AC008972.1	lincRNA
ENSG00000272081.1	44.5628	2.93559	0.594867	4.93486	8.02082e-07	1.02314e-05	AC008972.2	lincRNA
ENSG00000157107.14	1532.72	1.79867	0.263691	6.82112	9.03328e-12	2.33298e-10	FCHO2	protein_coding
ENSG00000251467.1	41.0952	1.81422	0.58185	3.11802	0.00182068	0.0101259	AC020893.2	processed_pseudogene
ENSG00000164331.10	2561.92	2.94738	0.260049	11.3339	8.91379e-30	9.00507e-28	ANKRA2	protein_coding
ENSG00000214944.9	2568.61	1.33203	0.237994	5.59688	2.18247e-08	3.643e-07	ARHGEF28	protein_coding
ENSG00000198780.12	6364.98	1.49876	0.254029	5.89997	3.63574e-09	6.85071e-08	FAM169A	protein_coding
ENSG00000271714.1	146.64	2.05623	0.371704	5.5319	3.1678e-08	5.14435e-07	AC010501.1	antisense
ENSG00000164251.5	498.265	-1.01613	0.283007	-3.59046	0.000330097	0.00232985	F2RL1	protein_coding
ENSG00000132846.6	680.035	-1.56911	0.271035	-5.78931	7.06743e-09	1.279e-07	ZBED3	protein_coding
ENSG00000164253.14	1390.34	1.14238	0.2575	4.43643	9.14647e-06	9.46051e-05	WDR41	protein_coding
ENSG00000244019.1	7.49797	4.95133	1.8103	2.73509	0.00623626	0.0284603	RPS2P24	processed_pseudogene
ENSG00000171540.7	147.981	6.28101	0.621394	10.1079	5.09455e-24	3.66152e-22	OTP	protein_coding
ENSG00000253558.1	26.7052	1.73194	0.678379	2.55306	0.010678	0.0445891	AC024568.1	transcribed_processed_pseudogene
ENSG00000113273.17	2821.76	-1.12198	0.250687	-4.47562	7.61904e-06	8.05281e-05	ARSB	protein_coding
ENSG00000132840.10	593.353	-1.54614	0.282487	-5.47331	4.41699e-08	6.99956e-07	BHMT2	protein_coding
ENSG00000145692.15	40.872	-1.75337	0.569045	-3.08126	0.00206129	0.0112379	BHMT	protein_coding
ENSG00000228716.7	2794.82	-1.59562	0.2452	-6.50741	7.64585e-11	1.7792e-09	DHFR	protein_coding
ENSG00000176055.10	425.905	-1.0364	0.283239	-3.65909	0.000253116	0.00183862	MBLAC2	protein_coding
ENSG00000113356.12	187.959	-1.57475	0.348814	-4.5146	6.34375e-06	6.81371e-05	POLR3G	protein_coding
ENSG00000175745.13	703.992	-1.10668	0.268558	-4.1208	3.77559e-05	0.000340291	NR2F1	protein_coding
ENSG00000248483.6	133.513	1.04472	0.376703	2.77331	0.00554888	0.0258007	POU5F2	protein_coding
ENSG00000133302.13	617.756	-1.0795	0.298483	-3.61664	0.000298453	0.00213466	SLF1	protein_coding
ENSG00000251348.1	143.264	1.04115	0.384693	2.70644	0.00680099	0.0305417	HSPD1P11	processed_pseudogene
ENSG00000164308.16	1389.62	-1.35609	0.283006	-4.79172	1.65359e-06	1.97044e-05	ERAP2	protein_coding
ENSG00000279232.2	30.4264	3.44263	0.747325	4.6066	4.09301e-06	4.57395e-05	AC008522.1	antisense
ENSG00000173930.9	34.1688	-2.47692	0.682515	-3.62911	0.000284405	0.00204406	SLCO4C1	protein_coding
ENSG00000181751.10	180.806	-2.54694	0.363321	-7.01016	2.38047e-12	6.57307e-11	C5orf30	protein_coding
ENSG00000171444.18	1213.82	3.43297	0.281764	12.1839	3.78813e-34	4.62574e-32	MCC	protein_coding
ENSG00000212122.3	29.46	8.39942	1.56832	5.35568	8.52349e-08	1.29006e-06	TSSK1B	protein_coding
ENSG00000152503.9	122.766	-1.24093	0.397793	-3.11954	0.00181136	0.0100852	TRIM36	protein_coding
ENSG00000164221.13	90.2018	-1.22062	0.412646	-2.95803	0.00309609	0.0158297	CCDC112	protein_coding
ENSG00000129596.5	58.5562	-1.33283	0.495337	-2.69077	0.00712882	0.0317671	CDO1	protein_coding
ENSG00000145779.8	1083.61	2.51149	0.254616	9.86381	5.9738e-23	3.88297e-21	TNFAIP8	protein_coding
ENSG00000113083.14	2174.66	-3.59746	0.263169	-13.6698	1.53898e-42	2.97793e-40	LOX	protein_coding
ENSG00000205302.7	2239.14	1.15546	0.274022	4.21666	2.47945e-05	0.00023351	SNX2	protein_coding
ENSG00000064652.11	489.342	1.01504	0.294819	3.44293	0.000575458	0.0037825	SNX24	protein_coding
ENSG00000168916.15	582.109	-3.71688	0.286441	-12.9761	1.67203e-38	2.59629e-36	ZNF608	protein_coding
ENSG00000251456.1	16.0548	-3.21903	0.971058	-3.31497	0.000916521	0.00566882	AC113398.2	sense_intronic
ENSG00000164904.18	10412.4	2.10718	0.234228	8.9963	2.33451e-19	1.20091e-17	ALDH7A1	protein_coding
ENSG00000113368.12	2733.58	-1.30246	0.243293	-5.35348	8.62802e-08	1.30353e-06	LMNB1	protein_coding
ENSG00000064651.14	1876.83	-1.6468	0.263548	-6.24857	4.14232e-10	8.8908e-09	SLC12A2	protein_coding
ENSG00000138829.12	1054.8	5.50974	0.302046	18.2414	2.42258e-74	1.45095e-71	FBN2	protein_coding
ENSG00000198108.4	51.9697	-3.02597	0.570968	-5.29972	1.15978e-07	1.7222e-06	CHSY3	protein_coding
ENSG00000186687.16	708.002	-1.09109	0.272775	-3.99995	6.33558e-05	0.000542449	LYRM7	protein_coding
ENSG00000072682.18	4509.69	2.17798	0.25965	8.38814	4.939e-17	2.17966e-15	P4HA2	protein_coding
ENSG00000164406.7	135.226	-1.02198	0.396659	-2.57647	0.00998151	0.0422417	LEAP2	protein_coding
ENSG00000053108.17	33.085	-2.06894	0.660647	-3.1317	0.001738	0.00973703	FSTL4	protein_coding
ENSG00000113583.8	4249.83	-1.15279	0.236261	-4.87929	1.0647e-06	1.32325e-05	C5orf15	protein_coding
ENSG00000237190.4	833.361	-1.1023	0.256084	-4.30442	1.67423e-05	0.000163174	CDKN2AIPNL	protein_coding
ENSG00000251169.2	42.988	-1.72721	0.570514	-3.02746	0.00246616	0.0130685	LINC01843	lincRNA
ENSG00000164616.16	1234.92	1.45848	0.27342	5.33422	9.5956e-08	1.43848e-06	FBXL21P	transcribed_unitary_pseudogene
ENSG00000112981.5	4.50194	-5.55986	2.06483	-2.69265	0.00708869	0.0316275	NME5	protein_coding
ENSG00000212460.1	4.24527	-5.47582	2.09611	-2.61237	0.00899176	0.0387109	RNU6-460P	snRNA
ENSG00000146013.11	31.3954	-3.35836	0.753682	-4.45593	8.35296e-06	8.73674e-05	GFRA3	protein_coding
ENSG00000120709.11	3308.29	-1.08353	0.238905	-4.53542	5.74894e-06	6.23338e-05	FAM53C	protein_coding
ENSG00000132563.16	1911.16	5.51382	0.315358	17.4843	1.88588e-68	9.30183e-66	REEP2	protein_coding
ENSG00000281398.4	758.18	-1.33949	0.286087	-4.68209	2.8397e-06	3.25433e-05	SNHG4	lincRNA
ENSG00000170464.10	304.303	1.0183	0.308876	3.29678	0.000977998	0.00598432	DNAJC18	protein_coding
ENSG00000184584.13	464.44	1.06242	0.297672	3.56908	0.000358243	0.00250322	TMEM173	protein_coding
ENSG00000113070.8	265.469	-2.29621	0.320202	-7.17112	7.43846e-13	2.17575e-11	HBEGF	protein_coding
ENSG00000249637.1	74.1015	-2.4284	0.480436	-5.05459	4.31323e-07	5.7959e-06	AC008438.1	antisense
ENSG00000213523.10	1404.57	1.23647	0.276131	4.47785	7.53993e-06	7.9759e-05	SRA1	protein_coding
ENSG00000113108.19	25.6199	4.72505	1.002	4.7156	2.41002e-06	2.80019e-05	APBB3	protein_coding
ENSG00000176087.15	38.2866	2.48747	0.628219	3.95955	7.50897e-05	0.000630468	SLC35A4	protein_coding
ENSG00000113248.6	16.8592	3.22312	0.943129	3.41747	0.000632059	0.00411476	PCDHB15	protein_coding
ENSG00000253537.3	24.1627	2.32368	0.731783	3.17536	0.00149649	0.00859258	PCDHGA7	protein_coding
ENSG00000254122.2	24.2459	2.4634	0.752525	3.27352	0.00106218	0.00642749	PCDHGB7	protein_coding
ENSG00000248449.2	13.894	2.67766	0.975497	2.74492	0.00605262	0.0277531	PCDHGB8P	transcribed_unitary_pseudogene
ENSG00000120318.16	116.471	-1.6222	0.408703	-3.96915	7.21305e-05	0.000608465	ARAP3	protein_coding
ENSG00000156453.13	23.4277	-3.53686	0.885337	-3.99493	6.47122e-05	0.000552371	PCDH1	protein_coding
ENSG00000113580.15	3762.45	1.37885	0.263209	5.2386	1.61799e-07	2.34856e-06	NR3C1	protein_coding
ENSG00000279679.1	87.4168	2.04728	0.432635	4.73212	2.22189e-06	2.59599e-05	AC091925.2	TEC
ENSG00000156463.18	262.106	-2.45223	0.375667	-6.52766	6.68039e-11	1.56467e-09	SH3RF2	protein_coding
ENSG00000164266.10	37.9463	-2.81913	0.74257	-3.79645	0.000146785	0.00113752	SPINK1	protein_coding
ENSG00000169252.5	33.0699	3.8759	0.749958	5.16816	2.36406e-07	3.32594e-06	ADRB2	protein_coding
ENSG00000173210.19	122.486	-1.98258	0.427081	-4.64216	3.44784e-06	3.90151e-05	ABLIM3	protein_coding
ENSG00000157510.14	53.2921	-1.6473	0.51098	-3.2238	0.001265	0.00746799	AFAP1L1	protein_coding
ENSG00000164284.15	1472.42	-1.01812	0.247938	-4.10638	4.01914e-05	0.00035992	GRPEL2	protein_coding
ENSG00000249669.9	111.017	1.35582	0.410753	3.30081	0.000964061	0.00590988	CARMN	lincRNA
ENSG00000230551.4	1257.55	1.31837	0.280158	4.70581	2.52859e-06	2.92984e-05	AC021078.1	processed_transcript
ENSG00000241112.1	96.4899	1.14669	0.401552	2.85565	0.00429493	0.0209013	RPL29P14	processed_pseudogene
ENSG00000183111.12	80.7337	2.27656	0.451025	5.04752	4.47579e-07	5.99194e-06	ARHGEF37	protein_coding
ENSG00000182578.13	128.106	4.15046	0.450015	9.22294	2.8907e-20	1.58422e-18	CSF1R	protein_coding
ENSG00000113721.14	901.587	-3.10611	0.290182	-10.704	9.74827e-27	8.48504e-25	PDGFRB	protein_coding
ENSG00000019582.15	4487.04	-1.5043	0.310673	-4.84208	1.2849e-06	1.5637e-05	CD74	protein_coding
ENSG00000145908.12	623.489	-1.47461	0.294706	-5.00368	5.62475e-07	7.39662e-06	ZNF300	protein_coding
ENSG00000145901.15	3056.73	1.1737	0.280015	4.19157	2.77027e-05	0.000257049	TNIP1	protein_coding
ENSG00000197043.14	1815.47	-1.01615	0.290159	-3.50204	0.000461718	0.00312134	ANXA6	protein_coding
ENSG00000196743.8	10476	3.46402	0.247983	13.9688	2.41736e-44	4.98433e-42	GM2A	protein_coding
ENSG00000271795.1	38.1189	1.6889	0.583222	2.89581	0.0037818	0.0187598	AC011337.1	antisense
ENSG00000113140.11	513.426	1.78194	0.296093	6.01818	1.76391e-09	3.44765e-08	SPARC	protein_coding
ENSG00000164574.16	2829.12	1.81691	0.24484	7.42079	1.16423e-13	3.73549e-12	GALNT10	protein_coding
ENSG00000241963.3	13.8846	3.74002	1.11924	3.34157	0.000833071	0.00522201	RN7SL655P	misc_RNA
ENSG00000170271.11	2455.81	3.42315	0.245694	13.9325	4.01766e-44	8.15034e-42	FAXDC2	protein_coding
ENSG00000113249.12	27.2018	1.91279	0.687953	2.78041	0.00542908	0.0253751	HAVCR1	protein_coding
ENSG00000055163.20	4375.58	6.37375	0.270787	23.5378	1.67264e-122	6.01074e-119	CYFIP2	protein_coding
ENSG00000164611.13	2259.43	1.43968	0.288336	4.99307	5.94273e-07	7.7778e-06	PTTG1	protein_coding
ENSG00000253522.6	243.073	-1.08429	0.310705	-3.48977	0.000483441	0.00324465	MIR3142HG	lincRNA
ENSG00000254186.2	31.8019	2.05122	0.645094	3.17973	0.00147414	0.00847975	AC113414.1	antisense
ENSG00000113328.19	7194.18	1.58085	0.262629	6.01935	1.75122e-09	3.42551e-08	CCNG1	protein_coding
ENSG00000072571.20	1800.6	1.5177	0.303025	5.0085	5.48548e-07	7.22446e-06	HMMR	protein_coding
ENSG00000038274.17	1967.66	1.08572	0.251363	4.31933	1.56503e-05	0.000153364	MAT2B	protein_coding
ENSG00000214357.8	466.358	1.54872	0.320465	4.83274	1.34669e-06	1.63022e-05	NEURL1B	protein_coding
ENSG00000164463.12	884.21	1.58513	0.261159	6.06958	1.28246e-09	2.5726e-08	CREBRF	protein_coding
ENSG00000113742.13	4697.24	1.76013	0.234394	7.50929	5.94507e-14	1.93967e-12	CPEB4	protein_coding
ENSG00000145920.15	2352.94	1.6926	0.347376	4.87254	1.10173e-06	1.3645e-05	CPLX2	protein_coding
ENSG00000074276.10	311.413	1.23942	0.401368	3.088	0.00201508	0.011017	CDHR2	protein_coding
ENSG00000169258.7	169.564	-1.30988	0.343974	-3.80806	0.000140059	0.00109059	GPRIN1	protein_coding
ENSG00000087206.17	1464.32	1.09485	0.252199	4.34122	1.41693e-05	0.000139996	UIMC1	protein_coding
ENSG00000160867.15	4555.74	-1.33147	0.296134	-4.49617	6.91873e-06	7.38712e-05	FGFR4	protein_coding
ENSG00000165671.20	72.1842	-1.73568	0.460808	-3.7666	0.000165488	0.00126071	NSD1	protein_coding
ENSG00000169230.10	3872.39	-1.22011	0.301412	-4.04798	5.16605e-05	0.000452322	PRELID1	protein_coding
ENSG00000146094.14	93.119	-1.29623	0.423847	-3.05824	0.00222639	0.0120002	DOK3	protein_coding
ENSG00000249684.5	49.4316	-1.35306	0.520028	-2.6019	0.00927097	0.0396416	AC106795.2	antisense
ENSG00000175309.15	1774.42	1.06622	0.267693	3.98301	6.80469e-05	0.000578479	PHYKPL	protein_coding
ENSG00000087116.16	571.27	4.69222	0.323757	14.493	1.34109e-47	3.21286e-45	ADAMTS2	protein_coding
ENSG00000204661.9	11.0493	3.0686	1.12154	2.73607	0.00621786	0.0284021	C5orf60	protein_coding
ENSG00000250999.1	70.275	2.87711	0.499995	5.75427	8.7016e-09	1.54582e-07	AC136604.3	antisense
ENSG00000222448.1	7.78978	-6.35531	1.85408	-3.42775	0.000608603	0.00398023	RN7SKP150	misc_RNA
ENSG00000245317.2	62.3329	-1.88268	0.511631	-3.67976	0.000233453	0.0017136	AC008393.1	lincRNA
ENSG00000146054.18	21.8116	-3.26226	0.850158	-3.83724	0.000124423	0.000984232	TRIM7	protein_coding
ENSG00000137273.5	46.3711	-2.87236	0.645243	-4.45159	8.52366e-06	8.88941e-05	FOXF2	protein_coding
ENSG00000054598.8	273.53	-1.35864	0.310289	-4.37862	1.19432e-05	0.000120028	FOXC1	protein_coding
ENSG00000250903.8	1214.53	1.11317	0.248695	4.47605	7.60354e-06	8.0398e-05	GMDS-DT	lincRNA
ENSG00000236086.4	58.2716	1.30916	0.505011	2.59234	0.00953263	0.0405948	HMGN2P28	processed_pseudogene
ENSG00000137267.6	1926.83	-2.04423	0.300365	-6.80582	1.00475e-11	2.57639e-10	TUBB2A	protein_coding
ENSG00000230269.6	815.083	2.9693	0.273327	10.8635	1.71936e-27	1.5502e-25	LINC02525	lincRNA
ENSG00000137285.10	867.97	-2.73022	0.291485	-9.3666	7.4908e-21	4.28253e-19	TUBB2B	protein_coding
ENSG00000270504.1	249.079	-1.35396	0.313384	-4.32045	1.55713e-05	0.000152768	AL391422.4	antisense
ENSG00000260604.2	1860.32	-2.4135	0.248623	-9.70748	2.80171e-22	1.75753e-20	AL590004.3	lincRNA
ENSG00000124787.13	718.851	-1.95753	0.285762	-6.85022	7.37359e-12	1.9221e-10	RPP40	protein_coding
ENSG00000272142.1	54.634	-1.36995	0.51805	-2.64444	0.00818261	0.0356916	AL359643.3	lincRNA
ENSG00000219607.3	32.0895	2.87938	0.708058	4.06659	4.77065e-05	0.00042063	PPP1R3G	protein_coding
ENSG00000261189.1	523.383	-1.60779	0.290016	-5.54379	2.95988e-08	4.83165e-07	AL031058.1	antisense
ENSG00000111837.11	93.2855	1.3487	0.431039	3.12895	0.0017543	0.00981525	MAK	protein_coding
ENSG00000197977.4	3428.96	-1.587	0.252144	-6.29403	3.0933e-10	6.73113e-09	ELOVL2	protein_coding
ENSG00000205269.6	1270.54	-1.88795	0.260839	-7.23797	4.55445e-13	1.37536e-11	TMEM170B	protein_coding
ENSG00000229896.2	11.4738	-3.35535	1.16555	-2.87878	0.00399222	0.0196756	AL157373.2	lincRNA
ENSG00000078401.7	415.629	1.57559	0.289884	5.43525	5.47202e-08	8.52314e-07	EDN1	protein_coding
ENSG00000050393.11	1255.09	-1.27027	0.281064	-4.51948	6.19917e-06	6.67552e-05	MCUR1	protein_coding
ENSG00000008083.14	2186.24	1.11834	0.249578	4.48091	7.43255e-06	7.88552e-05	JARID2	protein_coding
ENSG00000201367.1	30.6899	1.62329	0.6392	2.53957	0.0110989	0.046026	RNU6-522P	snRNA
ENSG00000229931.1	162.196	-1.59682	0.423782	-3.76802	0.000164546	0.00125696	AL137003.1	antisense
ENSG00000272341.1	305.066	-1.33499	0.335078	-3.98412	6.77308e-05	0.000576182	AL137003.2	lincRNA
ENSG00000112183.15	768.922	-1.83374	0.265358	-6.91045	4.83109e-12	1.29974e-10	RBM24	protein_coding
ENSG00000112186.12	1786.38	-1.0341	0.242968	-4.25612	2.08001e-05	0.000198362	CAP2	protein_coding
ENSG00000272269.1	145.295	-2.11253	0.392747	-5.37885	7.49624e-08	1.14422e-06	AL138724.1	antisense
ENSG00000137364.5	1005.78	-1.84225	0.266916	-6.90198	5.12816e-12	1.36941e-10	TPMT	protein_coding
ENSG00000165097.15	1032.71	-1.33646	0.275328	-4.85408	1.20949e-06	1.48141e-05	KDM1B	protein_coding
ENSG00000137393.9	1070.9	4.0462	0.278863	14.5096	1.05273e-47	2.57102e-45	RNF144B	protein_coding
ENSG00000172201.12	259.395	-1.35728	0.31224	-4.34691	1.38069e-05	0.000136683	ID4	protein_coding
ENSG00000146038.12	11961.3	-1.25488	0.2428	-5.16836	2.36152e-07	3.32594e-06	DCDC2	protein_coding
ENSG00000146049.1	18.5113	-2.18602	0.832903	-2.62458	0.00867559	0.0375554	KAAG1	protein_coding
ENSG00000111913.18	53.9984	1.41537	0.54542	2.59501	0.00945895	0.0403493	RIPOR2	protein_coding
ENSG00000079691.18	607.86	2.05292	0.306043	6.70796	1.97361e-11	4.90091e-10	CARMIL1	protein_coding
ENSG00000079689.14	443.234	-5.86048	0.395729	-14.8093	1.27509e-49	3.3067e-47	SCGN	protein_coding
ENSG00000124568.10	20.6631	-3.39568	0.911196	-3.72662	0.000194061	0.00145546	SLC17A1	protein_coding
ENSG00000112337.10	137.888	-2.68013	0.43283	-6.19211	5.9365e-10	1.2486e-08	SLC17A2	protein_coding
ENSG00000112343.11	2187.2	2.27393	0.248705	9.14309	6.06915e-20	3.25521e-18	TRIM38	protein_coding
ENSG00000272462.2	140.259	-1.27613	0.382908	-3.33273	0.000859987	0.00536736	U91328.1	lincRNA
ENSG00000278637.1	324.359	-1.43034	0.389058	-3.67641	0.000236543	0.00173224	HIST1H4A	protein_coding
ENSG00000274267.1	7373.44	-1.2043	0.32571	-3.69745	0.000217779	0.00161077	HIST1H3B	protein_coding
ENSG00000278463.1	1016.53	-2.13434	0.34301	-6.22237	4.89703e-10	1.04306e-08	HIST1H2AB	protein_coding
ENSG00000276410.3	535.938	-1.28186	0.301246	-4.25517	2.08886e-05	0.000198959	HIST1H2BB	protein_coding
ENSG00000010704.18	158.075	-1.90208	0.362065	-5.25343	1.49296e-07	2.18473e-06	HFE	protein_coding
ENSG00000197061.4	9253.46	-1.66887	0.307473	-5.42768	5.70906e-08	8.87586e-07	HIST1H4C	protein_coding
ENSG00000274290.2	42.3628	2.14065	0.637431	3.35824	0.000784398	0.00495426	HIST1H2BE	protein_coding
ENSG00000277157.1	4316.87	-1.94496	0.319881	-6.08026	1.19984e-09	2.41457e-08	HIST1H4D	protein_coding
ENSG00000277224.2	1478.64	-1.13618	0.319816	-3.55262	0.000381412	0.00264018	HIST1H2BF	protein_coding
ENSG00000274750.2	284.546	-1.0581	0.300992	-3.51537	0.000439137	0.00298933	HIST1H3E	protein_coding
ENSG00000158406.4	1346.58	-1.72996	0.317377	-5.45082	5.01395e-08	7.86321e-07	HIST1H4H	protein_coding
ENSG00000111801.16	139.54	-1.79988	0.370148	-4.86258	1.15863e-06	1.4252e-05	BTN3A3	protein_coding
ENSG00000272468.1	50.0633	2.56489	0.580499	4.41842	9.94248e-06	0.000101958	AL021807.1	lincRNA
ENSG00000124635.8	1498.63	1.40881	0.286321	4.92038	8.63761e-07	1.09131e-05	HIST1H2BJ	protein_coding
ENSG00000197903.7	431.5	4.97399	0.369058	13.4775	2.12069e-41	3.81042e-39	HIST1H2BK	protein_coding
ENSG00000274997.1	160.151	3.2197	0.436361	7.37852	1.60058e-13	5.07724e-12	HIST1H2AH	protein_coding
ENSG00000271755.1	29.8548	-4.18483	0.837193	-4.99864	5.77355e-07	7.57214e-06	AL031118.1	lincRNA
ENSG00000096654.15	251.51	-1.7096	0.364056	-4.69598	2.65336e-06	3.0547e-05	ZNF184	protein_coding
ENSG00000185130.5	1167.57	-1.66716	0.3169	-5.26084	1.43397e-07	2.10822e-06	HIST1H2BL	protein_coding
ENSG00000276368.1	2335.98	-1.32956	0.340022	-3.91022	9.22117e-05	0.000755074	HIST1H2AJ	protein_coding
ENSG00000273703.1	257.77	-1.14841	0.379135	-3.02901	0.00245354	0.0130098	HIST1H2BM	protein_coding
ENSG00000275221.1	481.941	-1.19812	0.371675	-3.22356	0.00126608	0.0074691	HIST1H2AK	protein_coding
ENSG00000276903.1	247.973	-1.3592	0.382296	-3.55535	0.000377473	0.00261579	HIST1H2AL	protein_coding
ENSG00000184357.4	1338.47	-1.86944	0.342927	-5.45142	4.99701e-08	7.84153e-07	HIST1H1B	protein_coding
ENSG00000197279.4	231.08	1.02146	0.360782	2.83123	0.00463695	0.0222813	ZNF165	protein_coding
ENSG00000187987.9	93.823	1.04023	0.411045	2.53069	0.0113838	0.0470365	ZSCAN23	protein_coding
ENSG00000246350.1	295.248	-3.30775	0.386025	-8.56877	1.046e-17	4.79273e-16	AL049543.1	antisense
ENSG00000213886.3	27.4859	-2.38441	0.713036	-3.34402	0.000825736	0.00518248	UBD	protein_coding
ENSG00000204681.11	89.126	-2.23796	0.462407	-4.8398	1.29969e-06	1.5794e-05	GABBR1	protein_coding
ENSG00000204642.14	133.906	-1.47313	0.391747	-3.76042	0.000169627	0.00128989	HLA-F	protein_coding
ENSG00000214922.9	98.8306	-1.11746	0.400118	-2.79283	0.00522494	0.024567	HLA-F-AS1	processed_transcript
ENSG00000273340.1	53.4945	-1.45515	0.53749	-2.70731	0.00678312	0.030475	MICE	transcribed_unprocessed_pseudogene
ENSG00000206341.7	76.8428	-2.28425	0.579783	-3.93984	8.15349e-05	0.000676677	HLA-H	unprocessed_pseudogene
ENSG00000230795.3	77.3115	-1.49325	0.487632	-3.06226	0.00219674	0.0118582	HLA-K	unprocessed_pseudogene
ENSG00000206503.13	12030.1	-1.16705	0.270131	-4.32033	1.55793e-05	0.000152786	HLA-A	protein_coding
ENSG00000204622.11	12.8724	-3.97442	1.20542	-3.29713	0.000976774	0.00597974	HLA-J	transcribed_unprocessed_pseudogene
ENSG00000204618.8	174.841	2.88061	0.364598	7.90077	2.77196e-15	1.03455e-13	RNF39	protein_coding
ENSG00000204616.11	30.4065	-2.41603	0.731259	-3.30393	0.000953408	0.00585954	TRIM31	protein_coding
ENSG00000204614.9	13.2236	-2.61787	1.03122	-2.53862	0.0111292	0.0461439	TRIM40	protein_coding
ENSG00000204613.11	321.882	-2.13074	0.301062	-7.07741	1.46874e-12	4.15126e-11	TRIM10	protein_coding
ENSG00000204610.13	967.767	-1.50815	0.310463	-4.85775	1.18729e-06	1.4576e-05	TRIM15	protein_coding
ENSG00000233892.1	90.0069	1.24557	0.416062	2.99371	0.0027561	0.014357	PAIP1P1	processed_pseudogene
ENSG00000204590.12	3397.35	-1.10754	0.273276	-4.05283	5.06025e-05	0.000443986	GNL1	protein_coding
ENSG00000137404.14	571.783	-1.43233	0.309761	-4.624	3.76419e-06	4.23282e-05	NRM	protein_coding
ENSG00000196230.13	46177.7	-1.61106	0.275484	-5.8481	4.97211e-09	9.21013e-08	TUBB	protein_coding
ENSG00000228022.5	28.5618	-2.53863	0.714273	-3.55415	0.000379203	0.00262706	HCG20	lincRNA
ENSG00000204580.13	4511.48	1.31429	0.297326	4.42037	9.85327e-06	0.000101084	DDR1	protein_coding
ENSG00000137411.17	2167.08	-1.04746	0.287034	-3.64925	0.000263008	0.00190418	VARS2	protein_coding
ENSG00000137310.12	517.854	-1.1164	0.292362	-3.81856	0.000134233	0.0010506	TCF19	protein_coding
ENSG00000204531.18	124.318	1.4616	0.413265	3.53672	0.000405127	0.00278518	POU5F1	protein_coding
ENSG00000206337.10	125.087	-1.2783	0.379077	-3.37214	0.000745878	0.00475363	HCP5	sense_overlapping
ENSG00000204444.11	3546.77	-1.07254	0.276276	-3.88214	0.000103543	0.000838036	APOM	protein_coding
ENSG00000204439.3	667.049	1.10992	0.318853	3.48098	0.00049959	0.00333879	C6orf47	protein_coding
ENSG00000213722.9	549.279	-1.90445	0.314964	-6.04656	1.47974e-09	2.93555e-08	DDAH2	protein_coding
ENSG00000213719.8	12924.3	-1.00022	0.26598	-3.76052	0.00016956	0.00128977	CLIC1	protein_coding
ENSG00000235663.1	93.763	-1.44091	0.420371	-3.42771	0.000608703	0.00398023	SAPCD1-AS1	antisense
ENSG00000204366.3	170.912	-1.46571	0.369825	-3.96326	7.39339e-05	0.000622009	ZBTB12	protein_coding
ENSG00000168477.19	176.485	1.84948	0.356588	5.18659	2.14182e-07	3.03535e-06	TNXB	protein_coding
ENSG00000213654.10	144.572	-2.31441	0.406685	-5.69091	1.26366e-08	2.19641e-07	GPSM3	protein_coding
ENSG00000204301.6	188.245	-1.71907	0.36534	-4.7054	2.53368e-06	2.93438e-05	NOTCH4	protein_coding
ENSG00000179344.16	12.8289	-3.55697	1.17212	-3.03466	0.00240807	0.012812	HLA-DQB1	protein_coding
ENSG00000204267.14	421.654	-1.51538	0.290904	-5.20922	1.8964e-07	2.71972e-06	TAP2	protein_coding
ENSG00000204261.8	27.0096	-1.87247	0.734534	-2.5492	0.0107971	0.0450042	PSMB8-AS1	lincRNA
ENSG00000240065.8	200.203	-2.82406	0.415897	-6.79028	1.11919e-11	2.86109e-10	PSMB9	protein_coding
ENSG00000168394.11	3481.89	1.34096	0.266257	5.03635	4.74501e-07	6.33886e-06	TAP1	protein_coding
ENSG00000235301.1	24.5565	3.38075	0.851021	3.97258	7.10981e-05	0.00060036	HLA-Z	unprocessed_pseudogene
ENSG00000204252.14	352.002	8.53542	0.779099	10.9555	6.25331e-28	5.69935e-26	HLA-DOA	protein_coding
ENSG00000204248.10	125.784	-3.48619	0.45125	-7.72562	1.11311e-14	3.91065e-13	COL11A2	protein_coding
ENSG00000204228.4	296.392	2.41894	0.372915	6.48657	8.78148e-11	2.03218e-09	HSD17B8	protein_coding
ENSG00000232940.5	61.1441	1.68487	0.504505	3.33964	0.000838864	0.00525439	HCG25	antisense
ENSG00000204209.13	1973.67	-1.53736	0.281752	-5.45644	4.85763e-08	7.64188e-07	DAXX	protein_coding
ENSG00000030110.13	1577.57	1.83579	0.272838	6.7285	1.71419e-11	4.28632e-10	BAK1	protein_coding
ENSG00000197251.3	13.5994	5.80796	1.65387	3.51173	0.000445201	0.0030235	LINC00336	lincRNA
ENSG00000096433.11	10280.1	1.28346	0.314023	4.08716	4.36693e-05	0.000388026	ITPR3	protein_coding
ENSG00000161896.12	887.284	9.07173	0.610857	14.8508	6.87011e-50	1.83849e-47	IP6K3	protein_coding
ENSG00000186577.14	391.949	1.16821	0.323724	3.60867	0.000307768	0.00219629	SMIM29	protein_coding
ENSG00000225339.3	43.8577	2.27314	0.566923	4.0096	6.08214e-05	0.000523243	AL354740.1	processed_transcript
ENSG00000112033.14	964.013	-1.05541	0.285047	-3.70258	0.000213421	0.00158133	PPARD	protein_coding
ENSG00000007866.21	2921.28	1.08874	0.292757	3.71892	0.000200073	0.00149298	TEAD3	protein_coding
ENSG00000096060.14	2434.7	-1.56496	0.242402	-6.45603	1.07487e-10	2.46476e-09	FKBP5	protein_coding
ENSG00000157343.8	25.7164	-2.14409	0.733066	-2.92482	0.00344654	0.0173942	ARMC12	protein_coding
ENSG00000197753.10	51.1234	-2.0547	0.532869	-3.85593	0.000115291	0.000920973	LHFPL5	protein_coding
ENSG00000156711.17	2995.96	1.85501	0.270439	6.85926	6.92188e-12	1.81375e-10	MAPK13	protein_coding
ENSG00000010030.14	44.8306	3.87394	0.656231	5.90332	3.56259e-09	6.72801e-08	ETV7	protein_coding
ENSG00000224666.3	4.1943	5.58505	2.10986	2.64712	0.00811815	0.0354412	Z84484.1	antisense
ENSG00000112078.14	2976.51	-1.13655	0.239411	-4.74728	2.06165e-06	2.42567e-05	KCTD20	protein_coding
ENSG00000281450.1	9.03436	4.17914	1.46135	2.85977	0.00423946	0.0206714	PANDAR	lincRNA
ENSG00000124762.13	18070.6	7.55468	0.27882	27.0952	1.12107e-161	9.40017e-158	CDKN1A	protein_coding
ENSG00000285244.1	32.5354	6.08197	1.1736	5.18234	2.19121e-07	3.10185e-06	DINOL	bidirectional_promoter_lncRNA
ENSG00000137193.14	1261.75	-1.26917	0.295858	-4.28979	1.78842e-05	0.000173489	PIM1	protein_coding
ENSG00000164626.9	13.444	-3.58198	1.10838	-3.23172	0.00123048	0.00729673	KCNK5	protein_coding
ENSG00000161911.11	20.2091	7.85358	1.62052	4.84632	1.25771e-06	1.53432e-05	TREML1	protein_coding
ENSG00000095970.16	3197.06	11.1401	0.649271	17.1579	5.48254e-66	2.50751e-63	TREM2	protein_coding
ENSG00000234753.5	124.013	-2.79793	0.424904	-6.58486	4.5532e-11	1.08978e-09	FOXP4-AS1	antisense
ENSG00000226917.5	11.3091	-4.38404	1.39029	-3.15334	0.00161416	0.00915539	LINC01276	lincRNA
ENSG00000112559.14	443.74	4.80653	0.371702	12.9311	3.00353e-38	4.6352e-36	MDFI	protein_coding
ENSG00000137218.10	331.65	1.03965	0.341528	3.04411	0.00233371	0.0124995	FRS3	protein_coding
ENSG00000188112.9	188	1.66464	0.425689	3.91046	9.2121e-05	0.000754576	C6orf132	protein_coding
ENSG00000124496.12	125.603	2.06411	0.410125	5.03288	4.83168e-07	6.44096e-06	TRERF1	protein_coding
ENSG00000124713.6	73.438	2.75596	0.535963	5.14207	2.71724e-07	3.77845e-06	GNMT	protein_coding
ENSG00000112640.15	7749.23	1.75459	0.265566	6.60697	3.92277e-11	9.43378e-10	PPP2R5D	protein_coding
ENSG00000124733.4	2537.91	-1.22598	0.295478	-4.14914	3.33723e-05	0.000305377	MEA1	protein_coding
ENSG00000124702.18	2804.26	-1.2509	0.280702	-4.45634	8.33702e-06	8.72805e-05	KLHDC3	protein_coding
ENSG00000272223.1	30.1038	2.12204	0.663929	3.19619	0.00139256	0.00808444	AL136304.1	antisense
ENSG00000112659.14	1249.24	1.25422	0.300761	4.17016	3.04388e-05	0.000279857	CUL9	protein_coding
ENSG00000146215.13	68.9162	-3.41481	0.561233	-6.08448	1.1687e-09	2.35754e-08	CRIP3	protein_coding
ENSG00000170734.11	3718.75	3.71938	0.246383	15.0959	1.72321e-51	4.76344e-49	POLH	protein_coding
ENSG00000236961.1	10.7391	4.39505	1.40583	3.12631	0.00177017	0.00988428	AL136131.2	lincRNA
ENSG00000137216.19	3772	1.5624	0.303811	5.14267	2.70856e-07	3.76904e-06	TMEM63B	protein_coding
ENSG00000262179.2	197.436	6.36464	0.559386	11.3779	5.38784e-30	5.57741e-28	MYMX	protein_coding
ENSG00000112759.18	4129.09	1.5628	0.283724	5.50817	3.6259e-08	5.82809e-07	SLC29A1	protein_coding
ENSG00000112818.10	154.937	-1.22588	0.379747	-3.22815	0.00124592	0.0073692	MEP1A	protein_coding
ENSG00000244694.7	1924.37	8.73856	0.415082	21.0526	2.16493e-98	3.20347e-95	PTCHD4	protein_coding
ENSG00000217631.1	8.32116	6.57052	1.85129	3.54915	0.000386475	0.00267229	FO393413.1	processed_pseudogene
ENSG00000031691.7	769.934	-1.4199	0.301912	-4.70302	2.56339e-06	2.96469e-05	CENPQ	protein_coding
ENSG00000226733.3	43.0123	-3.53195	0.681455	-5.18296	2.18394e-07	3.0933e-06	AL138826.1	lincRNA
ENSG00000112118.19	12725.6	-2.33822	0.252996	-9.24212	2.41664e-20	1.33606e-18	MCM3	protein_coding
ENSG00000216775.3	1198.94	-1.36608	0.253742	-5.38373	7.29569e-08	1.1143e-06	AL109918.1	transcribed_unprocessed_pseudogene
ENSG00000096092.6	481.463	-1.40839	0.288359	-4.88416	1.0387e-06	1.29671e-05	TMEM14A	protein_coding
ENSG00000243955.6	37.0212	-2.08352	0.665179	-3.13227	0.00173463	0.00973116	GSTA1	protein_coding
ENSG00000170899.11	325.556	-1.07051	0.30736	-3.4829	0.000496013	0.00331818	GSTA4	protein_coding
ENSG00000124743.6	77.1522	-1.62723	0.457947	-3.55331	0.000380409	0.00263469	KLHL31	protein_coding
ENSG00000137251.16	34.7758	-7.04991	1.54356	-4.5673	4.94052e-06	5.41756e-05	TINAG	protein_coding
ENSG00000151914.20	24957	1.06081	0.279224	3.79914	0.000145198	0.00112696	DST	protein_coding
ENSG00000112208.11	1780.53	-1.63434	0.245236	-6.66434	2.6586e-11	6.51822e-10	BAG2	protein_coding
ENSG00000218274.2	16.3661	2.35586	0.907889	2.59488	0.00946237	0.040357	AL121949.2	unprocessed_pseudogene
ENSG00000213312.3	81.105	2.55764	0.458277	5.58101	2.39131e-08	3.96529e-07	RPL7AP34	processed_pseudogene
ENSG00000266680.1	667.482	2.25963	0.270539	8.35233	6.69273e-17	2.91777e-15	AL135905.1	antisense
ENSG00000154079.6	221.454	1.61926	0.337395	4.79929	1.59231e-06	1.90283e-05	SDHAF4	protein_coding
ENSG00000156535.15	1183.98	4.22028	0.267577	15.7722	4.83022e-56	1.44648e-53	CD109	protein_coding
ENSG00000112701.18	3342.63	1.14631	0.282702	4.05485	5.01672e-05	0.000440473	SENP6	protein_coding
ENSG00000252498.1	145.417	1.97999	0.401797	4.92784	8.31437e-07	1.05577e-05	RNU6-1016P	snRNA
ENSG00000196586.14	3737.85	1.89582	0.245058	7.73619	1.02438e-14	3.60899e-13	MYO6	protein_coding
ENSG00000118418.14	1196.33	-1.34545	0.30747	-4.37587	1.20949e-05	0.000121359	HMGN3	protein_coding
ENSG00000135338.14	562.856	-1.40531	0.297353	-4.72605	2.28924e-06	2.6722e-05	LCA5	protein_coding
ENSG00000198478.8	2173.85	-1.50157	0.249127	-6.02736	1.66665e-09	3.27535e-08	SH3BGRL2	protein_coding
ENSG00000146242.8	184.453	-1.34261	0.343963	-3.90335	9.48719e-05	0.00077509	TPBG	protein_coding
ENSG00000135324.6	13.9921	-2.79332	1.02398	-2.72792	0.00637359	0.0289452	MRAP2	protein_coding
ENSG00000234155.1	106.24	-3.16406	0.458079	-6.90725	4.94124e-12	1.32428e-10	LINC02535	lincRNA
ENSG00000135318.12	900.453	-5.21761	0.319721	-16.3192	7.20221e-60	2.58816e-57	NT5E	protein_coding
ENSG00000118432.12	37.6433	-2.32681	0.613123	-3.79501	0.000147637	0.00114271	CNR1	protein_coding
ENSG00000146281.6	1780.65	-1.49066	0.243703	-6.11672	9.55206e-10	1.94876e-08	PM20D2	protein_coding
ENSG00000025039.14	67.2022	-3.15725	0.528829	-5.97026	2.36873e-09	4.54504e-08	RRAGD	protein_coding
ENSG00000112218.9	17.0303	-2.50182	0.905674	-2.76238	0.00573814	0.0265093	GPR63	protein_coding
ENSG00000112249.14	5691.16	2.13234	0.252513	8.44448	3.05389e-17	1.36449e-15	ASCC3	protein_coding
ENSG00000203809.6	41.6542	-1.47635	0.565517	-2.61062	0.00903793	0.0388764	LIN28B-AS1	lincRNA
ENSG00000187772.8	1604.6	-1.71976	0.255072	-6.74227	1.55933e-11	3.91077e-10	LIN28B	protein_coding
ENSG00000272398.6	7004.84	-1.16428	0.24804	-4.69392	2.6802e-06	3.08138e-05	CD24	protein_coding
ENSG00000178409.13	645.566	-1.57381	0.272112	-5.78367	7.30889e-09	1.3189e-07	BEND3	protein_coding
ENSG00000272476.1	50.6158	-1.76244	0.542952	-3.24603	0.00117025	0.00697739	AL024507.2	antisense
ENSG00000080546.13	3197.8	3.62621	0.266414	13.6112	3.43663e-42	6.47032e-40	SESN1	protein_coding
ENSG00000009413.15	5856.45	1.33798	0.268841	4.97685	6.46274e-07	8.4146e-06	REV3L	protein_coding
ENSG00000229276.1	40.7254	2.44573	0.636444	3.8428	0.000121638	0.000964976	REV3L-IT1	sense_intronic
ENSG00000231889.7	505.908	1.17691	0.275582	4.27063	1.94923e-05	0.000186934	TRAF3IP2-AS1	antisense
ENSG00000056972.19	265.246	1.07353	0.315027	3.40774	0.000655041	0.00424242	TRAF3IP2	protein_coding
ENSG00000010810.17	782.811	-3.38645	0.274035	-12.3578	4.42274e-35	5.61889e-33	FYN	protein_coding
ENSG00000230943.2	56.6414	2.69384	0.618749	4.35368	1.33868e-05	0.000132839	LINC02541	lincRNA
ENSG00000227502.2	141.943	-1.46343	0.39631	-3.69265	0.000221934	0.00163957	LINC01268	lincRNA
ENSG00000175967.3	20.2178	-2.15314	0.825092	-2.60957	0.00906552	0.0389551	FO393415.1	antisense
ENSG00000111816.8	2462.08	-1.68328	0.243699	-6.90719	4.94336e-12	1.32428e-10	FRK	protein_coding
ENSG00000216809.1	18.9373	2.96551	0.873193	3.39616	0.000683382	0.00440104	AL589993.1	processed_pseudogene
ENSG00000111860.14	956.155	2.52441	0.280304	9.00597	2.13765e-19	1.1019e-17	CEP85L	protein_coding
ENSG00000217330.1	21.9465	4.88896	1.08249	4.5164	6.28997e-06	6.76172e-05	SSXP10	processed_pseudogene
ENSG00000111912.20	534.768	-1.59095	0.283366	-5.61446	1.97182e-08	3.31558e-07	NCOA7	protein_coding
ENSG00000112282.18	3050.47	1.26164	0.260521	4.84276	1.28048e-06	1.55908e-05	MED23	protein_coding
ENSG00000118523.6	7007.09	1.35882	0.251864	5.39504	6.85073e-08	1.05272e-06	CCN2	protein_coding
ENSG00000146409.12	525.3	-2.06815	0.293144	-7.05507	1.72513e-12	4.84867e-11	SLC18B1	protein_coding
ENSG00000118515.11	2512.87	-1.87957	0.253368	-7.41832	1.18613e-13	3.79606e-12	SGK1	protein_coding
ENSG00000135541.21	506.684	-1.08172	0.33018	-3.27616	0.0010523	0.0063803	AHI1	protein_coding
ENSG00000220412.1	27.924	-5.13312	1.03903	-4.94032	7.79947e-07	9.9896e-06	AL356234.1	processed_pseudogene
ENSG00000237499.6	160.039	-2.11935	0.35913	-5.90135	3.60533e-09	6.8036e-08	AL357060.1	antisense
ENSG00000118503.15	3847.15	-2.22902	0.286778	-7.77261	7.68838e-15	2.74328e-13	TNFAIP3	protein_coding
ENSG00000112378.12	12919.4	1.5198	0.230952	6.58059	4.68585e-11	1.11728e-09	PERP	protein_coding
ENSG00000112379.9	1362.26	1.1253	0.246821	4.55919	5.13522e-06	5.60906e-05	ARFGEF3	protein_coding
ENSG00000135540.11	4205.14	-1.12286	0.288465	-3.89254	9.92015e-05	0.000806272	NHSL1	protein_coding
ENSG00000164442.10	596.114	1.28426	0.272587	4.71138	2.46049e-06	2.85619e-05	CITED2	protein_coding
ENSG00000112419.14	3460.7	1.44391	0.244212	5.91251	3.36931e-09	6.38216e-08	PHACTR2	protein_coding
ENSG00000118495.19	178.364	-1.55922	0.352996	-4.4171	1.00034e-05	0.000102374	PLAGL1	protein_coding
ENSG00000135604.9	31.0317	-4.50097	0.880807	-5.11006	3.22059e-07	4.40772e-06	STX11	protein_coding
ENSG00000111961.18	2572.74	1.09929	0.265709	4.1372	3.51566e-05	0.000320074	SASH1	protein_coding
ENSG00000215223.3	53.9194	1.96644	0.523083	3.75933	0.000170369	0.00129358	CYP51A1P3	processed_pseudogene
ENSG00000178199.13	200.245	-1.74261	0.347237	-5.01849	5.2078e-07	6.89123e-06	ZC3H12D	protein_coding
ENSG00000131019.11	51.4278	-1.66055	0.517668	-3.20775	0.00133779	0.00782379	ULBP3	protein_coding
ENSG00000198729.5	52.5727	2.85637	0.552099	5.17366	2.29557e-07	3.23617e-06	PPP1R14C	protein_coding
ENSG00000120278.16	335.625	3.70559	0.31799	11.6532	2.21022e-31	2.40685e-29	PLEKHG1	protein_coding
ENSG00000232891.1	19.2276	5.28265	1.25885	4.19642	2.71171e-05	0.000252547	AL450344.3	sense_intronic
ENSG00000224029.1	10.7457	6.94241	1.74354	3.98179	6.83984e-05	0.000580682	AL450344.1	sense_intronic
ENSG00000213089.4	8.56622	3.44365	1.33144	2.5864	0.00969837	0.041196	PDCL3P5	processed_pseudogene
ENSG00000131016.17	5104.14	-1.30387	0.237907	-5.48058	4.23941e-08	6.74098e-07	AKAP12	protein_coding
ENSG00000131018.23	1365.64	1.97757	0.249078	7.93953	2.02942e-15	7.66518e-14	SYNE1	protein_coding
ENSG00000112029.10	1786.08	-2.22092	0.253955	-8.74534	2.22348e-18	1.07149e-16	FBXO5	protein_coding
ENSG00000227627.2	138.544	-1.24751	0.36077	-3.45792	0.000544368	0.00360357	AL080276.2	antisense
ENSG00000146426.18	450.011	-1.0034	0.30131	-3.33012	0.000868071	0.00541039	TIAM2	protein_coding
ENSG00000235381.1	1022.24	1.91159	0.267183	7.15461	8.39126e-13	2.43182e-11	AL596202.1	antisense
ENSG00000029639.11	3793.49	1.1934	0.242944	4.91227	9.00282e-07	1.13517e-05	TFB1M	protein_coding
ENSG00000218596.2	123.709	1.02035	0.376256	2.71185	0.00669085	0.030125	AL162578.1	processed_pseudogene
ENSG00000175048.17	379.814	-1.48436	0.321853	-4.61192	3.98972e-06	4.46448e-05	ZDHHC14	protein_coding
ENSG00000120437.8	3246.77	-1.27898	0.252589	-5.06349	4.11656e-07	5.54942e-06	ACAT2	protein_coding
ENSG00000213073.4	809.639	1.65508	0.258565	6.40102	1.54341e-10	3.46958e-09	AL353625.1	transcribed_processed_pseudogene
ENSG00000146477.6	415.212	-2.28987	0.287672	-7.95999	1.72055e-15	6.54771e-14	SLC22A3	protein_coding
ENSG00000213071.11	24.9227	-2.07891	0.793503	-2.61991	0.00879523	0.0379948	LPAL2	transcribed_unprocessed_pseudogene
ENSG00000272841.1	128.223	-1.46632	0.390167	-3.75818	0.000171153	0.00129914	AL139393.2	antisense
ENSG00000227598.1	204.734	-1.22198	0.337402	-3.62174	0.000292631	0.00209659	Z94721.1	bidirectional_promoter_lncRNA
ENSG00000285730.1	334.817	-1.25441	0.319345	-3.92805	8.56369e-05	0.000706989	Z94721.3	bidirectional_promoter_lncRNA
ENSG00000112486.16	16.9239	-2.65129	0.892287	-2.97134	0.00296505	0.0152716	CCR6	protein_coding
ENSG00000166984.11	31.328	-2.8815	0.77152	-3.73484	0.000187834	0.00141339	TCP10L2	protein_coding
ENSG00000280707.2	22.4891	-3.5142	0.872392	-4.02824	5.61969e-05	0.000487291	AL353747.4	lincRNA
ENSG00000231720.1	152.844	-1.58732	0.358356	-4.42944	9.44771e-06	9.72808e-05	AL353747.3	lincRNA
ENSG00000228648.1	170.74	-1.97673	0.359593	-5.49714	3.86002e-08	6.18464e-07	AL353747.2	lincRNA
ENSG00000112494.10	233.702	-2.14577	0.355384	-6.0379	1.56134e-09	3.09012e-08	UNC93A	protein_coding
ENSG00000203690.12	28.628	-3.47785	0.78207	-4.44699	8.70839e-06	9.05204e-05	TCP10	protein_coding
ENSG00000272549.1	33.8532	-2.08758	0.631341	-3.30658	0.000944414	0.00581418	LINC02538	lincRNA
ENSG00000203688.5	28.3704	-1.96886	0.736565	-2.67303	0.00751696	0.0332143	LINC02487	lincRNA
ENSG00000198221.8	131.799	-1.37446	0.378671	-3.62969	0.000283757	0.00203999	AFDN-DT	lincRNA
ENSG00000153303.17	23.1499	3.49859	0.848215	4.12465	3.71296e-05	0.000335125	FRMD1	protein_coding
ENSG00000224417.2	372.306	-1.45555	0.314665	-4.62571	3.73323e-06	4.19988e-05	AL606970.1	sense_intronic
ENSG00000233085.5	76.8777	-1.11209	0.43863	-2.53538	0.0112326	0.0465267	BX322234.2	lincRNA
ENSG00000232640.1	122.346	1.68958	0.386211	4.37475	1.21571e-05	0.000121789	AL354892.2	antisense
ENSG00000130023.16	511.436	1.0997	0.28028	3.92358	8.72438e-05	0.000719547	ERMARD	protein_coding
ENSG00000177706.9	220.877	2.18375	0.3623	6.02747	1.66547e-09	3.27535e-08	FAM20C	protein_coding
ENSG00000239857.7	493.835	1.01223	0.362012	2.79613	0.00517178	0.0243878	GET4	protein_coding
ENSG00000105963.15	93.2849	2.16882	0.445435	4.869	1.12165e-06	1.38582e-05	ADAP1	protein_coding
ENSG00000073067.14	378.895	1.38127	0.316883	4.35894	1.30691e-05	0.00012984	CYP2W1	protein_coding
ENSG00000146540.15	1110.22	1.74048	0.305486	5.6974	1.21645e-08	2.12057e-07	C7orf50	protein_coding
ENSG00000257607.1	100.972	2.76257	0.460938	5.99336	2.05546e-09	3.98345e-08	AC073957.2	antisense
ENSG00000164850.15	476.953	-2.13883	0.34894	-6.12949	8.81599e-10	1.81182e-08	GPER1	protein_coding
ENSG00000164877.19	744.772	2.59164	0.325762	7.95561	1.78258e-15	6.77353e-14	MICALL2	protein_coding
ENSG00000225981.1	29.2305	3.64741	0.777285	4.6925	2.69892e-06	3.10148e-05	AC102953.1	antisense
ENSG00000225968.7	258.071	2.81623	0.379559	7.41974	1.1735e-13	3.76042e-12	ELFN1	protein_coding
ENSG00000106263.18	10368.4	-1.03342	0.261725	-3.9485	7.86439e-05	0.000656366	EIF3B	protein_coding
ENSG00000136295.15	12956.1	2.67053	0.30055	8.88548	6.3646e-19	3.17662e-17	TTYH3	protein_coding
ENSG00000157927.16	95.0756	2.76371	0.466023	5.93041	3.02174e-09	5.73674e-08	RADIL	protein_coding
ENSG00000164638.10	1147.93	-1.60606	0.322482	-4.9803	6.34856e-07	8.27451e-06	SLC29A4	protein_coding
ENSG00000182095.14	7142.65	-1.2201	0.284883	-4.28282	1.84537e-05	0.000178402	TNRC18	protein_coding
ENSG00000273084.1	396.271	1.00341	0.301677	3.32612	0.00088065	0.00548335	AC092171.5	lincRNA
ENSG00000075624.15	74695.5	-1.22047	0.261456	-4.668	3.04149e-06	3.46664e-05	ACTB	protein_coding
ENSG00000106305.10	2035.45	-1.0657	0.275704	-3.86537	0.000110921	0.000890876	AIMP2	protein_coding
ENSG00000136240.10	7125.35	-1.20874	0.252181	-4.79313	1.642e-06	1.95849e-05	KDELR2	protein_coding
ENSG00000236609.4	388.509	-1.13367	0.343786	-3.29761	0.00097511	0.00597101	ZNF853	protein_coding
ENSG00000205897.5	14.0657	-4.73503	1.33427	-3.54878	0.000387025	0.00267462	OR7E136P	unprocessed_pseudogene
ENSG00000250561.2	12.0782	-6.98374	1.70907	-4.08628	4.38349e-05	0.000389223	OR7E59P	unprocessed_pseudogene
ENSG00000106392.10	6636.78	-1.10154	0.248535	-4.43214	9.33004e-06	9.63057e-05	C1GALT1	protein_coding
ENSG00000244167.1	105.695	-2.37734	0.409361	-5.80743	6.34387e-09	1.1547e-07	AC005532.2	processed_pseudogene
ENSG00000215018.9	90.2598	-1.31055	0.431031	-3.0405	0.00236188	0.0126169	COL28A1	protein_coding
ENSG00000164654.16	915.777	-1.08969	0.307169	-3.54753	0.000388862	0.0026851	MIOS	protein_coding
ENSG00000106415.13	787.945	-1.9514	0.259457	-7.52108	5.43241e-14	1.77933e-12	GLCCI1	protein_coding
ENSG00000233264.2	99.3839	-1.7385	0.443328	-3.92149	8.8004e-05	0.000725341	AC006042.3	processed_pseudogene
ENSG00000106460.19	1490.15	1.00052	0.261197	3.83052	0.000127872	0.00100866	TMEM106B	protein_coding
ENSG00000006468.14	28.3238	-3.67301	0.793534	-4.62867	3.68016e-06	4.14203e-05	ETV1	protein_coding
ENSG00000214960.10	114.674	2.03369	0.393497	5.16826	2.36283e-07	3.32594e-06	ISPD	protein_coding
ENSG00000136261.15	2040.9	-1.00203	0.254546	-3.93654	8.26643e-05	0.000685147	BZW2	protein_coding
ENSG00000106537.8	392.229	-2.41798	0.304913	-7.93006	2.19033e-15	8.24818e-14	TSPAN13	protein_coding
ENSG00000106541.12	29.9608	-1.71086	0.669232	-2.55645	0.0105747	0.0442533	AGR2	protein_coding
ENSG00000106546.14	2579.49	1.12382	0.259304	4.33399	1.46432e-05	0.000144394	AHR	protein_coding
ENSG00000105855.10	25.8941	-2.87966	0.761457	-3.78178	0.000155711	0.00119857	ITGB8	protein_coding
ENSG00000164649.20	544.969	-2.57822	0.278246	-9.26598	1.93298e-20	1.07575e-18	CDCA7L	protein_coding
ENSG00000230658.1	118.638	1.67297	0.410314	4.07728	4.55657e-05	0.000403452	KLHL7-DT	lincRNA
ENSG00000122550.18	1034.02	1.53228	0.256363	5.97698	2.27312e-09	4.37493e-08	KLHL7	protein_coding
ENSG00000230042.1	46.3375	2.97819	0.586045	5.08183	3.73807e-07	5.06361e-06	AK3P3	processed_pseudogene
ENSG00000105926.15	1379.09	-1.87583	0.298595	-6.28218	3.33867e-10	7.24002e-09	MPP6	protein_coding
ENSG00000105928.15	4071.69	2.27658	0.239928	9.48861	2.34137e-21	1.37933e-19	GSDME	protein_coding
ENSG00000070882.13	4398.97	1.51439	0.235377	6.43389	1.24378e-10	2.82122e-09	OSBPL3	protein_coding
ENSG00000234999.1	37.0663	1.96927	0.599138	3.28683	0.00101322	0.00616986	SNRPCP19	processed_pseudogene
ENSG00000270933.1	56.6342	-2.79883	0.564628	-4.95695	7.16088e-07	9.22807e-06	AC010719.1	lincRNA
ENSG00000050344.9	799.514	-1.17924	0.272136	-4.33329	1.46896e-05	0.000144795	NFE2L3	protein_coding
ENSG00000122565.19	5412.28	-1.24836	0.255844	-4.87936	1.06432e-06	1.32325e-05	CBX3	protein_coding
ENSG00000005020.13	1381.89	1.02434	0.271054	3.77909	0.000157402	0.00121121	SKAP2	protein_coding
ENSG00000253552.7	185.938	-1.12323	0.33409	-3.36206	0.00077363	0.0049044	HOXA-AS2	antisense
ENSG00000106004.5	103.773	1.38097	0.39807	3.46916	0.000522081	0.0034734	HOXA5	protein_coding
ENSG00000253293.5	29.1391	1.84312	0.667437	2.76149	0.00575391	0.0265723	HOXA10	protein_coding
ENSG00000106031.8	17.5463	-3.10333	0.937826	-3.30907	0.000936068	0.00576845	HOXA13	protein_coding
ENSG00000146592.17	422.898	-1.75817	0.283262	-6.20685	5.40561e-10	1.14267e-08	CREB5	protein_coding
ENSG00000106066.15	2675.77	-1.16243	0.251948	-4.61375	3.95459e-06	4.43108e-05	CPVL	protein_coding
ENSG00000225264.3	38.3339	-1.87717	0.594436	-3.15789	0.00158913	0.00904811	ZNRF2P2	transcribed_processed_pseudogene
ENSG00000122574.10	1271.98	2.13229	0.262716	8.11634	4.80434e-16	1.92441e-14	WIPF3	protein_coding
ENSG00000238906.1	15.727	2.45852	0.930634	2.64176	0.00824753	0.0359499	RF01210	snoRNA
ENSG00000106080.10	949.341	-1.30602	0.283424	-4.60802	4.06527e-06	4.54498e-05	FKBP14	protein_coding
ENSG00000106100.11	154.04	-1.12988	0.376686	-2.99953	0.002704	0.0141206	NOD1	protein_coding
ENSG00000106355.10	1779.06	-1.01959	0.264415	-3.85601	0.000115254	0.000920972	LSM5	protein_coding
ENSG00000237004.4	94.4813	-1.8574	0.434068	-4.27905	1.87696e-05	0.000181039	ZNRF2P1	transcribed_processed_pseudogene
ENSG00000273014.1	107.216	-1.03315	0.396864	-2.60329	0.00923334	0.0395012	AC018645.2	lincRNA
ENSG00000122507.20	447.212	1.15788	0.279256	4.14632	3.37862e-05	0.000308603	BBS9	protein_coding
ENSG00000238090.1	15.7167	3.93854	1.08943	3.61524	0.000300072	0.00214502	AC006195.1	processed_pseudogene
ENSG00000197085.11	645.559	1.83192	0.294192	6.22695	4.7559e-10	1.01557e-08	NPSR1-AS1	processed_transcript
ENSG00000106483.12	171.249	1.1321	0.34094	3.32052	0.000898491	0.00557375	SFRP4	protein_coding
ENSG00000175600.15	707.033	2.02615	0.26444	7.66201	1.83039e-14	6.2815e-13	SUGCT	protein_coding
ENSG00000248711.1	64.7322	1.53276	0.489611	3.13056	0.00174471	0.00977031	THUMPD3P1	unprocessed_pseudogene
ENSG00000106628.10	1987.13	-1.68246	0.291517	-5.77141	7.86128e-09	1.40548e-07	POLD2	protein_coding
ENSG00000058404.20	52.427	1.48695	0.55888	2.66059	0.00780039	0.0342441	CAMK2B	protein_coding
ENSG00000015520.14	2929.61	3.31988	0.292855	11.3363	8.67836e-30	8.80258e-28	NPC1L1	protein_coding
ENSG00000136271.10	2978.13	-1.04237	0.272195	-3.82949	0.000128411	0.00101196	DDX56	protein_coding
ENSG00000272768.1	22.5305	-2.14623	0.75328	-2.84918	0.00438324	0.0212407	AC004854.2	antisense
ENSG00000136286.16	46.3167	4.77854	0.756543	6.31629	2.67922e-10	5.89123e-09	MYO1G	protein_coding
ENSG00000136274.9	523.663	4.41703	0.317835	13.8972	6.58395e-44	1.31444e-41	NACAD	protein_coding
ENSG00000136270.14	3222.62	-1.02332	0.279594	-3.66002	0.000252198	0.00183301	TBRG4	protein_coding
ENSG00000201772.1	62.3154	-1.69782	0.48127	-3.5278	0.000419029	0.00286978	SNORA5C	snoRNA
ENSG00000164742.16	500.604	1.13365	0.302201	3.7513	0.000175918	0.00133049	ADCY1	protein_coding
ENSG00000283247.2	35.0484	2.94577	0.656486	4.48718	7.21737e-06	7.68641e-05	AC096582.3	protein_coding
ENSG00000146678.10	33175.5	1.75455	0.234126	7.49404	6.6785e-14	2.17051e-12	IGFBP1	protein_coding
ENSG00000146674.15	1656.61	2.04069	0.249931	8.16502	3.21381e-16	1.31882e-14	IGFBP3	protein_coding
ENSG00000183696.14	456.078	-1.10173	0.315279	-3.49445	0.000475043	0.00319853	UPP1	protein_coding
ENSG00000132436.11	776.954	-1.16846	0.303622	-3.84842	0.000118884	0.000946672	FIGNL1	protein_coding
ENSG00000132437.18	323.209	-3.59292	0.355365	-10.1105	4.96304e-24	3.57723e-22	DDC	protein_coding
ENSG00000106070.19	319.782	-2.31848	0.313965	-7.38451	1.53018e-13	4.86006e-12	GRB10	protein_coding
ENSG00000106078.19	95.8649	1.41458	0.405362	3.48967	0.000483614	0.00324495	COBL	protein_coding
ENSG00000132432.14	1775.25	-1.00037	0.292305	-3.42235	0.000620818	0.00404682	SEC61G	protein_coding
ENSG00000146648.18	1358.09	-2.58802	0.26277	-9.84899	6.92388e-23	4.47738e-21	EGFR	protein_coding
ENSG00000224057.1	188.877	-1.8885	0.401164	-4.70755	2.50716e-06	2.90779e-05	EGFR-AS1	antisense
ENSG00000132434.9	719.702	-1.1097	0.269946	-4.11081	3.94282e-05	0.000354025	LANCL2	protein_coding
ENSG00000223475.1	37.1422	4.93275	0.857593	5.75186	8.8268e-09	1.56475e-07	AC099681.1	antisense
ENSG00000233977.1	20.7589	7.89554	1.61359	4.89316	9.92283e-07	1.24493e-05	AC099681.3	lincRNA
ENSG00000231394.1	29.7402	5.37817	1.04928	5.12559	2.96609e-07	4.09506e-06	AC099681.2	lincRNA
ENSG00000146733.14	3146.99	1.37673	0.239354	5.75188	8.82574e-09	1.56475e-07	PSPH	protein_coding
ENSG00000198039.11	409.49	-1.14272	0.291849	-3.91546	9.02301e-05	0.000741745	ZNF273	protein_coding
ENSG00000146757.13	979.156	-1.11276	0.290987	-3.82409	0.000131255	0.00102986	ZNF92	protein_coding
ENSG00000226767.1	24.3864	-3.89321	0.899629	-4.32758	1.50759e-05	0.000148254	AC114501.1	processed_pseudogene
ENSG00000196715.7	2104.75	-1.3149	0.24013	-5.47579	4.35569e-08	6.91277e-07	VKORC1L1	protein_coding
ENSG00000188763.4	80.9389	-1.47798	0.480933	-3.07316	0.00211805	0.0115025	FZD9	protein_coding
ENSG00000009950.16	3948.18	-1.14111	0.320845	-3.55658	0.000375716	0.00260649	MLXIPL	protein_coding
ENSG00000274080.1	263.686	-1.06303	0.364008	-2.92035	0.00349633	0.0176041	AC005089.1	sense_intronic
ENSG00000176428.6	158.717	1.92866	0.414633	4.65149	3.29545e-06	3.73747e-05	VPS37D	protein_coding
ENSG00000071462.11	1779.41	-1.01859	0.269038	-3.78603	0.000153073	0.00117942	BUD23	protein_coding
ENSG00000165171.11	292.309	2.11079	0.398064	5.30264	1.14138e-07	1.70091e-06	METTL27	protein_coding
ENSG00000106683.15	953.468	-1.39434	0.330975	-4.21284	2.52179e-05	0.000236876	LIMK1	protein_coding
ENSG00000049541.11	1056.69	-1.72724	0.276208	-6.2534	4.01613e-10	8.64206e-09	RFC2	protein_coding
ENSG00000274523.5	1960.95	-1.20622	0.283485	-4.25496	2.09082e-05	0.000199071	RCC1L	protein_coding
ENSG00000174428.17	159.259	-1.36871	0.349156	-3.92006	8.85264e-05	0.000728692	GTF2IRD2B	protein_coding
ENSG00000177679.16	164.653	2.42764	0.390432	6.21783	5.04084e-10	1.07278e-08	SRRM3	protein_coding
ENSG00000146707.14	299.382	1.17278	0.296743	3.95217	7.74463e-05	0.000647564	POMZP3	protein_coding
ENSG00000214439.4	135.555	1.65301	0.364918	4.52981	5.90361e-06	6.38184e-05	FAM185BP	transcribed_unprocessed_pseudogene
ENSG00000127955.17	1059.94	3.60116	0.265348	13.5714	5.91416e-42	1.08592e-39	GNAI1	protein_coding
ENSG00000135218.19	99.216	1.72971	0.422077	4.09809	4.16565e-05	0.000371848	CD36	protein_coding
ENSG00000186472.20	126.892	1.86521	0.382016	4.88254	1.04726e-06	1.30544e-05	PCLO	protein_coding
ENSG00000164659.15	526.284	2.14822	0.311603	6.89411	5.42036e-12	1.44285e-10	KIAA1324L	protein_coding
ENSG00000182165.17	577.948	3.35499	0.285934	11.7335	8.58634e-32	9.59953e-30	TP53TG1	lincRNA
ENSG00000005469.11	620.821	2.14507	0.320663	6.68949	2.23949e-11	5.53926e-10	CROT	protein_coding
ENSG00000005471.17	221.054	-2.26863	0.353168	-6.42365	1.33045e-10	3.00966e-09	ABCB4	protein_coding
ENSG00000085563.14	314.455	-1.0507	0.30767	-3.41501	0.000637786	0.00414883	ABCB1	protein_coding
ENSG00000008277.14	341.951	-1.4983	0.310246	-4.82937	1.36964e-06	1.65562e-05	ADAM22	protein_coding
ENSG00000164647.9	163.788	-2.95501	0.401165	-7.36608	1.7572e-13	5.55305e-12	STEAP1	protein_coding
ENSG00000157214.14	78.4771	-1.89089	0.451064	-4.19206	2.76433e-05	0.000256593	STEAP2	protein_coding
ENSG00000243144.6	20.1292	2.11515	0.784186	2.69726	0.00699136	0.0312876	AC079760.2	lincRNA
ENSG00000127914.16	6042.07	1.60347	0.278284	5.762	8.31216e-09	1.48293e-07	AKAP9	protein_coding
ENSG00000001630.17	198.773	-1.34067	0.351401	-3.81521	0.000136066	0.00106342	CYP51A1	protein_coding
ENSG00000127980.16	1093.43	1.25919	0.279244	4.5093	6.50428e-06	6.97422e-05	PEX1	protein_coding
ENSG00000206763.1	37.5876	2.52102	0.647003	3.89646	9.76106e-05	0.000794626	RNU6-10P	snRNA
ENSG00000205413.8	174.487	-2.58854	0.451485	-5.73339	9.84405e-09	1.7353e-07	SAMD9	protein_coding
ENSG00000158528.12	1928.54	1.00383	0.275494	3.64375	0.000268699	0.00193949	PPP1R9A	protein_coding
ENSG00000005421.8	13.4421	-2.68694	0.996709	-2.69581	0.00702183	0.0313849	PON1	protein_coding
ENSG00000005981.13	203.994	-1.1227	0.339432	-3.30758	0.000941062	0.0057978	ASB4	protein_coding
ENSG00000208025.1	14.5163	2.75244	0.957787	2.87375	0.00405632	0.0199329	MIR591	miRNA
ENSG00000180535.3	35.5891	-2.7543	0.695073	-3.96261	7.41343e-05	0.000623278	BHLHA15	protein_coding
ENSG00000205356.9	476.759	1.21861	0.318439	3.82684	0.000129801	0.0010202	TECPR1	protein_coding
ENSG00000006453.14	1686.57	1.19437	0.243498	4.90505	9.34027e-07	1.17477e-05	BAIAP2L1	protein_coding
ENSG00000002079.14	238.898	6.395	0.531827	12.0246	2.63905e-33	3.08769e-31	MYH16	transcribed_unitary_pseudogene
ENSG00000160917.15	3252.59	2.90504	0.291787	9.95603	2.37353e-23	1.61805e-21	CPSF4	protein_coding
ENSG00000197343.11	2735.96	1.34492	0.267132	5.03467	4.78674e-07	6.38782e-06	ZNF655	protein_coding
ENSG00000106258.15	204.159	1.45562	0.35482	4.1024	4.08879e-05	0.000365247	CYP3A5	protein_coding
ENSG00000160870.14	58.2682	1.70446	0.503818	3.38309	0.000716759	0.00460186	CYP3A7	protein_coding
ENSG00000021461.16	157.535	3.41514	0.416466	8.20027	2.39841e-16	1.00053e-14	CYP3A43	protein_coding
ENSG00000237640.1	6.65635	-6.12829	1.90795	-3.21198	0.00131826	0.00771898	AC004522.2	antisense
ENSG00000166508.17	5387.42	-1.49573	0.289473	-5.1671	2.37759e-07	3.34311e-06	MCM7	protein_coding
ENSG00000221838.9	308.135	-1.14025	0.321402	-3.54776	0.000388528	0.00268353	AP4M1	protein_coding
ENSG00000166997.8	190.205	-1.26696	0.362105	-3.49888	0.000467213	0.00315172	CNPY4	protein_coding
ENSG00000214309.5	65.1407	-1.7374	0.473556	-3.66885	0.000243649	0.00177767	MBLAC1	protein_coding
ENSG00000197093.11	707.539	6.88988	0.404057	17.0517	3.3923e-65	1.47126e-62	GAL3ST4	protein_coding
ENSG00000239521.8	1483.51	1.72223	0.26071	6.60592	3.95069e-11	9.49184e-10	CASTOR3	protein_coding
ENSG00000166924.9	82.7371	2.52352	0.493647	5.11199	3.18775e-07	4.36753e-06	NYAP1	protein_coding
ENSG00000196411.10	5284.43	2.02319	0.286365	7.06507	1.60541e-12	4.52228e-11	EPHB4	protein_coding
ENSG00000263672.2	8.51197	4.1346	1.51194	2.73464	0.00624487	0.0284856	RN7SL750P	misc_RNA
ENSG00000146828.18	805.061	1.50531	0.300841	5.00367	5.62502e-07	7.39662e-06	SLC12A9	protein_coding
ENSG00000087087.20	3872.23	-1.10507	0.291401	-3.79228	0.000149272	0.00115288	SRRT	protein_coding
ENSG00000087085.15	784.107	4.08424	0.335407	12.177	4.12346e-34	4.98681e-32	ACHE	protein_coding
ENSG00000205277.9	64.6934	-2.26881	0.493937	-4.59331	4.36268e-06	4.85375e-05	MUC12	protein_coding
ENSG00000169876.13	12.1125	2.68556	1.0523	2.55209	0.0107079	0.0446919	MUC17	protein_coding
ENSG00000106366.8	25914.8	3.59459	0.270184	13.3042	2.18823e-40	3.71925e-38	SERPINE1	protein_coding
ENSG00000128564.7	35.8121	-1.77817	0.608954	-2.92005	0.0034998	0.017611	VGF	protein_coding
ENSG00000106384.12	874.782	1.79092	0.264697	6.76592	1.32461e-11	3.36011e-10	MOGAT3	protein_coding
ENSG00000160991.16	983.382	1.19066	0.287401	4.14286	3.42994e-05	0.000313063	ORAI2	protein_coding
ENSG00000222011.9	439.761	1.97616	0.288192	6.85708	7.02832e-12	1.83972e-10	FAM185A	protein_coding
ENSG00000213385.3	60.7538	2.29932	0.502516	4.57561	4.74832e-06	5.22959e-05	AC105052.2	processed_pseudogene
ENSG00000238324.1	6.66808	4.74336	1.84917	2.56513	0.0103137	0.0433342	RN7SKP198	misc_RNA
ENSG00000005483.20	2237.43	1.16307	0.270111	4.30589	1.66313e-05	0.000162218	KMT2E	protein_coding
ENSG00000185055.11	155.751	6.01206	0.570242	10.543	5.47301e-26	4.58912e-24	EFCAB10	protein_coding
ENSG00000105856.14	1216.25	1.03812	0.251127	4.13386	3.56721e-05	0.00032383	HBP1	protein_coding
ENSG00000091129.20	403.771	-2.29741	0.322673	-7.11995	1.07966e-12	3.10033e-11	NRCAM	protein_coding
ENSG00000226965.1	144.031	10.6877	1.49298	7.15862	8.14952e-13	2.36722e-11	AC092167.1	lincRNA
ENSG00000128512.21	3167.75	1.54199	0.244002	6.31959	2.62256e-10	5.7717e-09	DOCK4	protein_coding
ENSG00000222346.1	21.2107	2.11888	0.772995	2.74113	0.00612289	0.0280345	RNA5SP237	rRNA_pseudogene
ENSG00000234358.1	59.8103	1.98127	0.50529	3.92107	8.81584e-05	0.000726376	AC003080.1	processed_pseudogene
ENSG00000181016.9	66.0241	1.63313	0.483192	3.37988	0.000725185	0.00464292	LSMEM1	protein_coding
ENSG00000135272.10	16.1994	3.17931	0.983484	3.2327	0.00122626	0.00727512	MDFIC	protein_coding
ENSG00000135269.18	645.604	1.28931	0.269879	4.77735	1.77621e-06	2.10757e-05	TES	protein_coding
ENSG00000105971.15	55.9049	2.03876	0.526768	3.87033	0.000108689	0.000874068	CAV2	protein_coding
ENSG00000105976.15	3408.52	-1.3886	0.244322	-5.6835	1.31963e-08	2.29091e-07	MET	protein_coding
ENSG00000004866.20	558.548	-1.08583	0.285062	-3.80908	0.000139483	0.00108717	ST7	protein_coding
ENSG00000106034.18	1156.54	1.46995	0.321974	4.56544	4.98455e-06	5.4587e-05	CPED1	protein_coding
ENSG00000280828.1	71.3997	2.15964	0.516358	4.18244	2.88394e-05	0.000266417	AC090114.3	unprocessed_pseudogene
ENSG00000242588.6	261.487	1.17662	0.382316	3.07761	0.00208668	0.0113542	AC108010.1	processed_transcript
ENSG00000243302.3	376.991	1.09372	0.35693	3.06424	0.00218226	0.0117876	AC018638.4	processed_pseudogene
ENSG00000230715.3	145.028	1.09875	0.425089	2.58474	0.00974513	0.0413597	AC018638.2	processed_pseudogene
ENSG00000135253.13	316.989	1.85896	0.351866	5.28313	1.26996e-07	1.87807e-06	KCP	protein_coding
ENSG00000158457.6	671.235	1.49085	0.276775	5.38651	7.18401e-08	1.09923e-06	TSPAN33	protein_coding
ENSG00000128602.10	814.98	-1.28504	0.311126	-4.13031	3.62279e-05	0.000328046	SMO	protein_coding
ENSG00000186591.12	2493.47	1.14241	0.239259	4.7748	1.79884e-06	2.13141e-05	UBE2H	protein_coding
ENSG00000091704.10	264.366	5.94751	0.472138	12.597	2.19452e-36	2.98395e-34	CPA1	protein_coding
ENSG00000285106.1	244.384	2.33591	0.321089	7.27494	3.4657e-13	1.06187e-11	AC016831.7	lincRNA
ENSG00000233559.1	939.15	1.70017	0.268374	6.33508	2.37216e-10	5.23436e-09	LINC00513	lincRNA
ENSG00000226380.9	660.878	2.46563	0.269604	9.14537	5.94249e-20	3.19409e-18	AC016831.1	lincRNA
ENSG00000273319.1	133.104	1.23884	0.413391	2.99676	0.00272862	0.0142374	AC058791.1	lincRNA
ENSG00000128567.17	1124.52	2.73529	0.256489	10.6643	1.49468e-26	1.28763e-24	PODXL	protein_coding
ENSG00000198074.10	1404.34	1.76259	0.248513	7.09254	1.31676e-12	3.74695e-11	AKR1B10	protein_coding
ENSG00000146859.6	352.349	-1.10147	0.352123	-3.12809	0.00175945	0.00983749	TMEM140	protein_coding
ENSG00000122787.15	295.29	-2.07325	0.323384	-6.41112	1.44457e-10	3.25612e-09	AKR1D1	protein_coding
ENSG00000122779.18	8322.63	1.11183	0.264097	4.20993	2.55449e-05	0.00023968	TRIM24	protein_coding
ENSG00000229677.1	35.2829	2.35884	0.636123	3.70816	0.000208775	0.00155055	AC018644.1	processed_pseudogene
ENSG00000236279.7	17.6187	-2.2741	0.895369	-2.53984	0.0110902	0.0459975	CLEC2L	protein_coding
ENSG00000059377.17	201.502	-2.79869	0.345255	-8.10614	5.22525e-16	2.08637e-14	TBXAS1	protein_coding
ENSG00000059378.12	516.132	-1.12048	0.293091	-3.82297	0.000131856	0.00103425	PARP12	protein_coding
ENSG00000260231.2	667.978	1.23724	0.27017	4.5795	4.66095e-06	5.14835e-05	KDM7A-DT	bidirectional_promoter_lncRNA
ENSG00000257093.7	786.805	-1.01113	0.258852	-3.90622	9.37508e-05	0.000767176	KIAA1147	protein_coding
ENSG00000127362.2	93.2737	1.12939	0.439243	2.57122	0.0101342	0.0427512	TAS2R3	protein_coding
ENSG00000197993.9	54.5266	3.86047	0.604749	6.3836	1.72974e-10	3.85742e-09	KEL	protein_coding
ENSG00000198420.10	2696.88	1.50585	0.25174	5.98178	2.20718e-09	4.25454e-08	TCAF1	protein_coding
ENSG00000174469.22	213.817	-2.92853	0.3412	-8.58303	9.2408e-18	4.24958e-16	CNTNAP2	protein_coding
ENSG00000197362.14	407.21	1.31443	0.286999	4.57993	4.6514e-06	5.14311e-05	ZNF786	protein_coding
ENSG00000204947.9	132.141	1.95518	0.37319	5.23911	1.61356e-07	2.34349e-06	ZNF425	protein_coding
ENSG00000244560.7	152.544	1.04114	0.390552	2.66582	0.00768002	0.0338338	AC004890.2	transcribed_unprocessed_pseudogene
ENSG00000181220.17	1099.17	1.34206	0.276481	4.85405	1.20963e-06	1.48141e-05	ZNF746	protein_coding
ENSG00000133624.13	1239.75	2.39976	0.263291	9.11445	7.90721e-20	4.19632e-18	ZNF767P	transcribed_unprocessed_pseudogene
ENSG00000133619.17	949.974	2.32681	0.313003	7.43382	1.05506e-13	3.38953e-12	KRBA1	protein_coding
ENSG00000181444.13	12.9797	3.66338	1.12112	3.2676	0.00108462	0.00653814	ZNF467	protein_coding
ENSG00000197558.11	1323.01	6.65813	0.366832	18.1504	1.27561e-73	7.46231e-71	SSPO	protein_coding
ENSG00000278685.4	18.1269	7.69851	1.63125	4.71939	2.3655e-06	2.74973e-05	IQCA1L	protein_coding
ENSG00000082014.16	94.8176	2.30271	0.475999	4.83764	1.31391e-06	1.59515e-05	SMARCD3	protein_coding
ENSG00000187260.15	20.4607	-2.49306	0.823631	-3.02691	0.00247065	0.0130895	WDR86	protein_coding
ENSG00000243836.5	11.2039	-3.23844	1.24905	-2.59271	0.00952227	0.0405644	WDR86-AS1	processed_transcript
ENSG00000178234.13	2779.68	3.29099	0.247207	13.3127	1.95377e-40	3.36624e-38	GALNT11	protein_coding
ENSG00000229591.1	19.2668	2.02272	0.803454	2.51753	0.0118182	0.0484259	AC006017.1	antisense
ENSG00000213188.3	22.2516	3.90776	0.915289	4.26943	1.95972e-05	0.000187868	YBX1P4	processed_pseudogene
ENSG00000055609.18	4122.38	1.3096	0.238927	5.48118	4.22504e-08	6.72238e-07	KMT2C	protein_coding
ENSG00000196584.3	1229.41	-1.37181	0.249623	-5.49553	3.89548e-08	6.23747e-07	XRCC2	protein_coding
ENSG00000204876.4	131.139	1.08231	0.415953	2.602	0.0092683	0.0396369	AC021218.1	lincRNA
ENSG00000117868.16	6646.93	2.30295	0.238646	9.6501	4.91075e-22	3.01292e-20	ESYT2	protein_coding
ENSG00000126870.16	438.917	1.41318	0.279973	5.04755	4.4751e-07	5.99194e-06	WDR60	protein_coding
ENSG00000253620.2	13.8937	3.38619	1.09164	3.10191	0.00192275	0.0105928	AC144568.1	processed_pseudogene
ENSG00000223508.5	350.056	1.48909	0.296915	5.01521	5.29764e-07	7.00274e-06	RPL23AP53	transcribed_processed_pseudogene
ENSG00000182366.9	105.443	5.59611	0.612617	9.13476	6.55534e-20	3.50105e-18	FAM87A	lincRNA
ENSG00000147364.16	2225.9	1.54396	0.240072	6.43126	1.26549e-10	2.86787e-09	FBXO25	protein_coding
ENSG00000279852.1	94.5478	-1.10662	0.436578	-2.53477	0.0112522	0.0466	AC083964.2	TEC
ENSG00000182372.9	1762.19	2.29046	0.268087	8.54372	1.29968e-17	5.94424e-16	CLN8	protein_coding
ENSG00000253982.1	128.996	1.28445	0.398981	3.21931	0.00128498	0.00755935	AC100810.1	antisense
ENSG00000091879.13	84.4216	-3.70814	0.522167	-7.10145	1.23457e-12	3.52505e-11	ANGPT2	protein_coding
ENSG00000164825.4	239.617	4.3366	0.385133	11.26	2.06733e-29	2.02349e-27	DEFB1	protein_coding
ENSG00000254625.1	16.2094	2.5281	0.906105	2.79008	0.00526957	0.0247537	AF233439.2	antisense
ENSG00000284606.1	27.8382	2.10199	0.693712	3.03006	0.00244504	0.0129785	AC105233.5	processed_transcript
ENSG00000173281.5	27.5578	-1.70377	0.674798	-2.52486	0.0115744	0.0476378	PPP1R3B	protein_coding
ENSG00000272267.2	66.7406	-1.67959	0.471246	-3.56413	0.000365061	0.00254379	AC021242.3	antisense
ENSG00000171056.8	98.1363	3.40925	0.485603	7.02065	2.20842e-12	6.11815e-11	SOX7	protein_coding
ENSG00000205879.5	7.12972	3.8132	1.5222	2.50506	0.0122432	0.0498346	FAM90A2P	unprocessed_pseudogene
ENSG00000251402.3	9.29111	3.60961	1.3031	2.77001	0.00560553	0.0260161	FAM90A25P	unprocessed_pseudogene
ENSG00000104213.12	67.4575	-1.37708	0.465612	-2.95758	0.00310068	0.01585	PDGFRL	protein_coding
ENSG00000265520.1	39.1617	1.47197	0.579164	2.54154	0.0110364	0.0457969	MIR548V	miRNA
ENSG00000253671.2	152.149	2.12791	0.397249	5.35662	8.47941e-08	1.28416e-06	AC027117.1	processed_transcript
ENSG00000156006.5	7.87454	-3.7843	1.50727	-2.51071	0.012049	0.0492034	NAT2	protein_coding
ENSG00000156011.17	999.46	1.36921	0.254161	5.38717	7.15747e-08	1.09584e-06	PSD3	protein_coding
ENSG00000104611.12	634.728	-2.18688	0.269796	-8.10567	5.24544e-16	2.09111e-14	SH2D4A	protein_coding
ENSG00000158806.14	1145.62	1.06222	0.304622	3.48701	0.000488459	0.00327484	NPM2	protein_coding
ENSG00000158856.18	2337.88	2.3465	0.2831	8.2886	1.14591e-16	4.92741e-15	DMTN	protein_coding
ENSG00000158863.22	1556.45	1.30903	0.31139	4.20383	2.62438e-05	0.000245688	FAM160B2	protein_coding
ENSG00000275074.2	158.778	2.48314	0.3871	6.41471	1.41088e-10	3.18588e-09	NUDT18	protein_coding
ENSG00000168453.15	386.412	1.27961	0.309619	4.13286	3.58272e-05	0.000324768	HR	protein_coding
ENSG00000168476.12	1461.48	1.09607	0.271418	4.03832	5.38364e-05	0.00046925	REEP4	protein_coding
ENSG00000168487.19	1392.94	1.80718	0.31283	5.77687	7.61044e-09	1.36646e-07	BMP1	protein_coding
ENSG00000177725.5	37.2531	1.92908	0.602474	3.20193	0.00136509	0.0079525	AC105206.1	sense_overlapping
ENSG00000168490.14	31.3832	2.675	0.669237	3.99709	6.41257e-05	0.000547922	PHYHIP	protein_coding
ENSG00000197181.12	90.7067	-2.3831	0.458514	-5.19745	2.02037e-07	2.88109e-06	PIWIL2	protein_coding
ENSG00000104635.14	12146.7	-1.8894	0.250418	-7.545	4.52274e-14	1.49697e-12	SLC39A14	protein_coding
ENSG00000120896.13	1481.99	-1.12315	0.297313	-3.77767	0.000158303	0.00121666	SORBS3	protein_coding
ENSG00000179388.9	74.5654	-2.54576	0.469928	-5.41733	6.04941e-08	9.34722e-07	EGR3	protein_coding
ENSG00000253125.1	25.035	4.67053	0.98611	4.73632	2.1763e-06	2.54864e-05	AC055854.1	processed_transcript
ENSG00000245025.2	78.7867	1.87044	0.521878	3.58405	0.000338307	0.00238245	AC107959.1	antisense
ENSG00000120889.13	14422.8	1.96826	0.244651	8.04518	8.61222e-16	3.36921e-14	TNFRSF10B	protein_coding
ENSG00000253616.5	93.1107	-3.69747	0.501434	-7.37378	1.65851e-13	5.25439e-12	AC107959.3	antisense
ENSG00000173530.6	2162.66	1.03151	0.243856	4.23	2.33688e-05	0.000220661	TNFRSF10D	protein_coding
ENSG00000104689.9	1340.8	2.39884	0.256256	9.36111	7.89042e-21	4.50076e-19	TNFRSF10A	protein_coding
ENSG00000240694.9	43.7036	-4.77338	0.800295	-5.96453	2.45339e-09	4.69316e-08	PNMA2	protein_coding
ENSG00000092964.18	4746.53	-2.50324	0.246099	-10.1717	2.65351e-24	1.969e-22	DPYSL2	protein_coding
ENSG00000120899.18	464.615	2.08108	0.302962	6.86911	6.46041e-12	1.69991e-10	PTK2B	protein_coding
ENSG00000120915.13	518.25	-1.30063	0.291164	-4.467	7.93237e-06	8.3489e-05	EPHX2	protein_coding
ENSG00000120885.21	9977.23	-3.00299	0.281751	-10.6583	1.59448e-26	1.36891e-24	CLU	protein_coding
ENSG00000168077.14	507.296	-5.26768	0.36879	-14.2837	2.76632e-46	6.26908e-44	SCARA3	protein_coding
ENSG00000171320.14	1960.78	-2.30954	0.266939	-8.65195	5.06248e-18	2.38031e-16	ESCO2	protein_coding
ENSG00000168078.10	1016.08	-1.28471	0.269807	-4.7616	1.92063e-06	2.26718e-05	PBK	protein_coding
ENSG00000186918.14	448.316	-1.51582	0.30002	-5.05238	4.36332e-07	5.85382e-06	ZNF395	protein_coding
ENSG00000214050.8	20.5603	-1.99128	0.778546	-2.55769	0.010537	0.044125	FBXO16	protein_coding
ENSG00000104290.11	332.507	-2.11212	0.306015	-6.90201	5.127e-12	1.36941e-10	FZD3	protein_coding
ENSG00000120875.9	344.856	-2.43202	0.333141	-7.30027	2.87183e-13	8.92965e-12	DUSP4	protein_coding
ENSG00000177669.3	577.517	-1.76312	0.27779	-6.34696	2.19607e-10	4.87144e-09	MBOAT4	protein_coding
ENSG00000127589.4	165.441	-1.58961	0.385223	-4.12647	3.68379e-05	0.000332732	TUBBP1	transcribed_processed_pseudogene
ENSG00000254109.5	167.815	2.39235	0.354035	6.75737	1.4052e-11	3.55255e-10	RBPMS-AS1	antisense
ENSG00000104691.15	638.192	-1.0745	0.284369	-3.77852	0.000157761	0.00121323	UBXN8	protein_coding
ENSG00000133863.8	456.898	-2.0561	0.289857	-7.09348	1.30779e-12	3.72564e-11	TEX15	protein_coding
ENSG00000172733.11	28.9455	-2.12642	0.678945	-3.13194	0.00173654	0.0097354	PURG	protein_coding
ENSG00000247134.6	13.5465	2.6367	0.979312	2.6924	0.00709403	0.0316457	AC090204.1	lincRNA
ENSG00000133874.2	236.451	-1.29721	0.360576	-3.5976	0.000321166	0.00227832	RNF122	protein_coding
ENSG00000020181.17	327.469	3.6274	0.319697	11.3464	7.7297e-30	7.90409e-28	ADGRA2	protein_coding
ENSG00000187840.5	1000.38	-1.4279	0.319531	-4.46875	7.8679e-06	8.29146e-05	EIF4EBP1	protein_coding
ENSG00000169499.15	469.655	-1.11801	0.281696	-3.96886	7.22178e-05	0.000608997	PLEKHA2	protein_coding
ENSG00000169495.5	8.42361	6.59053	1.8168	3.62754	0.000286135	0.00205473	HTRA4	protein_coding
ENSG00000176907.4	3647.22	-1.21017	0.268459	-4.50782	6.54983e-06	7.01409e-05	TCIM	protein_coding
ENSG00000029534.20	610.965	5.59896	0.34375	16.2879	1.20287e-59	4.20251e-57	ANK1	protein_coding
ENSG00000260588.1	22.695	2.96678	0.809656	3.66425	0.000248068	0.00180665	AC027702.1	lincRNA
ENSG00000104371.5	58.1922	-5.20364	0.759329	-6.85295	7.23448e-12	1.88975e-10	DKK4	protein_coding
ENSG00000221869.4	201.128	-2.24792	0.367015	-6.12487	9.07564e-10	1.86213e-08	CEBPD	protein_coding
ENSG00000104738.17	7871.03	-1.20006	0.242687	-4.94489	7.61849e-07	9.77771e-06	MCM4	protein_coding
ENSG00000253474.1	7.45378	6.41259	1.87158	3.4263	0.000611863	0.00399673	AC022568.1	lincRNA
ENSG00000147509.14	144.129	1.84865	0.375481	4.92342	8.50453e-07	1.0772e-05	RGS20	protein_coding
ENSG00000272457.1	10.3075	5.41771	1.73545	3.12179	0.00179753	0.0100193	AC113194.1	antisense
ENSG00000167904.15	1569.53	2.69807	0.265889	10.1473	3.40546e-24	2.49024e-22	TMEM68	protein_coding
ENSG00000137574.10	1545.44	1.36132	0.287326	4.73789	2.15955e-06	2.53139e-05	TGS1	protein_coding
ENSG00000254087.8	312.563	-1.97021	0.315392	-6.24685	4.188e-10	8.98117e-09	LYN	protein_coding
ENSG00000169122.11	515.333	2.52451	0.299506	8.4289	3.48931e-17	1.55077e-15	FAM110B	protein_coding
ENSG00000254777.5	11.5022	-4.40409	1.36566	-3.22489	0.00126021	0.00744319	AC022182.1	lincRNA
ENSG00000137563.12	2555.39	-1.50155	0.279815	-5.36623	8.03998e-08	1.22055e-06	GGH	protein_coding
ENSG00000137561.4	75.827	-1.46158	0.46538	-3.14061	0.00168598	0.00950915	TTPA	protein_coding
ENSG00000172817.4	88.7551	-1.60812	0.437344	-3.67702	0.000235979	0.00173062	CYP7B1	protein_coding
ENSG00000253190.3	45.9976	2.74605	0.584288	4.69982	2.60393e-06	3.00054e-05	AC084082.1	lincRNA
ENSG00000147573.17	24.513	3.26883	0.845544	3.86595	0.000110659	0.000889056	TRIM55	protein_coding
ENSG00000147576.17	19.1866	2.40546	0.823725	2.92023	0.00349776	0.0176043	ADHFE1	protein_coding
ENSG00000104205.14	469.678	-1.85997	0.287577	-6.46774	9.94806e-11	2.28533e-09	SGK3	protein_coding
ENSG00000066777.9	3252.47	1.52721	0.256695	5.94953	2.68919e-09	5.12862e-08	ARFGEF1	protein_coding
ENSG00000165078.12	127.48	2.23541	0.384717	5.81054	6.22717e-09	1.13675e-07	CPA6	protein_coding
ENSG00000253339.1	21.3613	-2.08438	0.785311	-2.65421	0.00794944	0.0348134	AC111149.2	lincRNA
ENSG00000164749.11	348.586	-1.87141	0.291858	-6.41205	1.43578e-10	3.23921e-09	HNF4G	protein_coding
ENSG00000104432.14	77.0939	1.19711	0.466297	2.56727	0.0102502	0.0431392	IL7	protein_coding
ENSG00000164684.13	1030.48	-2.7535	0.26669	-10.3247	5.4483e-25	4.23e-23	ZNF704	protein_coding
ENSG00000253516.1	24.5277	-1.89515	0.717244	-2.64227	0.00823528	0.0359089	HMGB1P41	processed_pseudogene
ENSG00000076641.4	44.9324	-1.9341	0.551607	-3.5063	0.000454375	0.00307719	PAG1	protein_coding
ENSG00000164687.11	1756.56	-1.76933	0.244733	-7.22963	4.84319e-13	1.45036e-11	FABP5	protein_coding
ENSG00000253598.1	84.3999	-1.61466	0.453969	-3.55675	0.000375466	0.00260598	SLC10A5	protein_coding
ENSG00000185015.8	476.361	-1.31627	0.277834	-4.7376	2.16269e-06	2.53388e-05	CA13	protein_coding
ENSG00000254231.2	132.008	-1.04638	0.374384	-2.79494	0.00519087	0.0244503	AC103760.1	processed_transcript
ENSG00000104312.8	730.828	-1.85107	0.272687	-6.78827	1.13485e-11	2.8982e-10	RIPK2	protein_coding
ENSG00000253250.3	14.3872	-3.34466	1.03975	-3.2168	0.00129629	0.00761695	C8orf88	protein_coding
ENSG00000248858.7	59.9524	1.62903	0.506655	3.21526	0.00130328	0.00764553	AC104211.1	processed_transcript
ENSG00000188343.12	268.297	-1.10023	0.321057	-3.42689	0.000610528	0.00399009	FAM92A	protein_coding
ENSG00000271971.1	109.137	1.04184	0.391025	2.66438	0.00771306	0.0339615	AC120053.1	antisense
ENSG00000175305.17	361.053	-3.09548	0.312722	-9.89851	4.2253e-23	2.79704e-21	CCNE2	protein_coding
ENSG00000164938.14	9632.22	2.92061	0.249414	11.7099	1.13425e-31	1.25692e-29	TP53INP1	protein_coding
ENSG00000253878.5	204.935	2.44285	0.340132	7.18207	6.86626e-13	2.01541e-11	AC087752.3	sense_intronic
ENSG00000156471.12	1992.37	-1.75939	0.248664	-7.07536	1.49066e-12	4.20849e-11	PTDSS1	protein_coding
ENSG00000104324.16	761.267	1.21783	0.261628	4.65482	3.2427e-06	3.68429e-05	CPQ	protein_coding
ENSG00000156509.14	254.508	-2.17544	0.332834	-6.53611	6.31407e-11	1.48301e-09	FBXO43	protein_coding
ENSG00000253666.1	209.363	2.3234	0.332902	6.97923	2.9681e-12	8.12434e-11	AP000424.1	antisense
ENSG00000254364.1	18.1064	3.32075	0.937096	3.54366	0.000394609	0.00272254	AP000424.2	antisense
ENSG00000048392.11	9263.69	4.24842	0.243527	17.4454	3.73291e-68	1.8058e-65	RRM2B	protein_coding
ENSG00000246263.2	170.469	3.05518	0.37199	8.21306	2.15629e-16	9.01022e-15	UBR5-AS1	antisense
ENSG00000272037.1	9.67605	3.63467	1.29502	2.80666	0.00500577	0.0237336	AP002907.1	antisense
ENSG00000247081.7	116.387	3.11626	0.445865	6.98924	2.76371e-12	7.58136e-11	BAALC-AS1	antisense
ENSG00000176406.22	70.0726	2.45154	0.503789	4.86619	1.13768e-06	1.40423e-05	RIMS2	protein_coding
ENSG00000164841.5	13.3703	-2.65709	1.00691	-2.63885	0.00831882	0.0362167	TMEM74	protein_coding
ENSG00000164796.18	228.803	3.67779	0.3923	9.37495	6.92096e-21	3.96576e-19	CSMD3	protein_coding
ENSG00000136960.12	166.019	-1.65965	0.363426	-4.56668	4.95516e-06	5.42887e-05	ENPP2	protein_coding
ENSG00000136982.6	930.697	-1.79712	0.257658	-6.97484	3.06212e-12	8.37258e-11	DSCC1	protein_coding
ENSG00000155792.10	42.2213	-2.90753	0.618406	-4.70165	2.58064e-06	2.98053e-05	DEPTOR	protein_coding
ENSG00000165156.15	1428.8	-1.1355	0.282607	-4.01795	5.87058e-05	0.000507123	ZHX1	protein_coding
ENSG00000156802.13	7598.99	-1.85919	0.242962	-7.65219	1.97583e-14	6.72559e-13	ATAD2	protein_coding
ENSG00000283172.1	54.9929	-2.27018	0.535336	-4.24067	2.2285e-05	0.00021122	MIR548D1	miRNA
ENSG00000245149.3	114.379	-1.3283	0.408393	-3.25249	0.00114398	0.00684184	RNF139-AS1	lincRNA
ENSG00000255491.2	34.983	-3.83797	0.799103	-4.80285	1.56424e-06	1.87463e-05	AC100858.3	lincRNA
ENSG00000104549.12	2671.83	-1.76223	0.241825	-7.2872	3.16464e-13	9.76766e-12	SQLE	protein_coding
ENSG00000168672.4	550.429	3.66302	0.29373	12.4707	1.07825e-35	1.4351e-33	FAM84B	protein_coding
ENSG00000253438.3	126.86	1.97138	0.41646	4.73365	2.2052e-06	2.58008e-05	PCAT1	antisense
ENSG00000282961.1	99.4295	1.68603	0.451057	3.73795	0.00018553	0.00139731	PRNCR1	lincRNA
ENSG00000249859.10	3209.68	2.60244	0.282541	9.21083	3.23617e-20	1.76585e-18	PVT1	lincRNA
ENSG00000221771.1	55.2632	2.82638	0.538713	5.24654	1.54984e-07	2.26138e-06	MIR1205	miRNA
ENSG00000207110.1	83.7283	2.75887	0.464522	5.93916	2.86487e-09	5.45127e-08	RNU1-106P	snRNA
ENSG00000283200.1	66.8315	2.79695	0.519519	5.38373	7.2958e-08	1.1143e-06	MIR1206	miRNA
ENSG00000221176.1	50.7737	2.25461	0.667834	3.37601	0.000735462	0.00469795	MIR1207	miRNA
ENSG00000286034.1	64.9605	3.1707	0.537387	5.90021	3.63048e-09	6.84592e-08	AC100822.1	lincRNA
ENSG00000254275.6	42.1677	1.67538	0.582675	2.87532	0.00403619	0.0198537	LINC00824	processed_transcript
ENSG00000008513.16	1485.74	-1.98026	0.292684	-6.76587	1.32508e-11	3.36011e-10	ST3GAL1	protein_coding
ENSG00000261220.2	23.9683	-2.39529	0.771346	-3.10534	0.00190062	0.0105008	AC103706.1	lincRNA
ENSG00000169427.8	16.1615	-3.23102	0.969046	-3.33423	0.000855368	0.00534313	KCNK9	protein_coding
ENSG00000167632.15	1379.03	1.81712	0.294099	6.1786	6.46741e-10	1.35235e-08	TRAPPC9	protein_coding
ENSG00000282164.3	651.979	-1.35845	0.287698	-4.72178	2.33794e-06	2.72147e-05	PEG13	sense_intronic
ENSG00000104472.10	1277.08	-1.46944	0.247682	-5.93277	2.97871e-09	5.6636e-08	CHRAC1	protein_coding
ENSG00000105339.10	322.164	1.66667	0.343075	4.85802	1.18564e-06	1.45628e-05	DENND3	protein_coding
ENSG00000022567.9	33.5796	2.70061	0.653178	4.13456	3.55631e-05	0.000323073	SLC45A4	protein_coding
ENSG00000184489.11	206.705	1.7321	0.371531	4.66207	3.13051e-06	3.56004e-05	PTP4A3	protein_coding
ENSG00000171045.15	392.095	1.73337	0.323735	5.35428	8.5899e-08	1.29933e-06	TSNARE1	protein_coding
ENSG00000181790.11	23.9837	4.00721	0.901709	4.44402	8.82943e-06	9.17408e-05	ADGRB1	protein_coding
ENSG00000232722.3	7.87787	5.02737	1.79884	2.79478	0.00519351	0.0244558	MROH4P	transcribed_unitary_pseudogene
ENSG00000198576.4	92.1475	4.67823	0.591697	7.90647	2.64791e-15	9.92672e-14	ARC	protein_coding
ENSG00000253196.1	13.4038	-2.72468	1.04318	-2.61189	0.00900428	0.0387528	AC083841.1	antisense
ENSG00000180155.20	402.445	3.47434	0.34003	10.2178	1.65114e-24	1.23615e-22	LYNX1	protein_coding
ENSG00000167656.5	98.9086	5.09994	0.593338	8.59534	8.3022e-18	3.83196e-16	LY6D	protein_coding
ENSG00000160882.11	30.8101	4.40006	0.85403	5.15212	2.5756e-07	3.5954e-06	CYP11B1	protein_coding
ENSG00000250571.7	250.267	1.63005	0.370637	4.39796	1.09272e-05	0.000110752	GLI4	protein_coding
ENSG00000253716.5	200.876	2.2914	0.339263	6.75404	1.43779e-11	3.62765e-10	MINCR	antisense
ENSG00000272172.1	29.4192	1.65961	0.648297	2.55995	0.0104688	0.0438903	AC138696.2	antisense
ENSG00000158106.14	56.8369	1.54234	0.532435	2.89676	0.00377038	0.0187291	RHPN1	protein_coding
ENSG00000253931.1	50.3811	2.18574	0.549045	3.98098	6.86306e-05	0.000582457	AC105118.1	antisense
ENSG00000182759.3	132.984	1.80208	0.384436	4.6876	2.7643e-06	3.17081e-05	MAFA	protein_coding
ENSG00000014164.7	729.987	1.19793	0.31063	3.85646	0.000115039	0.000919836	ZC3H3	protein_coding
ENSG00000179886.5	158.012	1.2436	0.368516	3.37462	0.00073917	0.00471924	TIGD5	protein_coding
ENSG00000104524.14	164.343	1.24954	0.382718	3.26491	0.00109499	0.00659429	PYCR3	protein_coding
ENSG00000180921.7	3814.07	1.66199	0.277911	5.98029	2.22743e-09	4.29028e-08	FAM83H	protein_coding
ENSG00000265660.1	99.1534	1.47116	0.419125	3.51008	0.00044797	0.00303902	MIR4664	miRNA
ENSG00000203499.11	125.985	1.8116	0.412234	4.39458	1.10986e-05	0.000112168	IQANK1	protein_coding
ENSG00000180900.19	3125.69	1.7332	0.285847	6.0634	1.33273e-09	2.66706e-08	SCRIB	protein_coding
ENSG00000261150.2	9242.53	4.96132	0.289699	17.1257	9.53941e-66	4.28507e-63	EPPK1	protein_coding
ENSG00000178209.15	10988.5	1.58034	0.255011	6.19715	5.74953e-10	1.2113e-08	PLEC	protein_coding
ENSG00000178814.17	1390.85	1.25727	0.336557	3.73569	0.0001872	0.00140904	OPLAH	protein_coding
ENSG00000197858.11	2556.15	1.52474	0.295576	5.15852	2.48908e-07	3.4843e-06	GPAA1	protein_coding
ENSG00000179832.17	776.434	1.58095	0.323825	4.8821	1.04962e-06	1.30774e-05	MROH1	protein_coding
ENSG00000173137.12	431.057	1.57913	0.326388	4.8382	1.31018e-06	1.59139e-05	ADCK5	protein_coding
ENSG00000147804.9	1075.85	1.8007	0.332652	5.41316	6.19205e-08	9.55589e-07	SLC39A4	protein_coding
ENSG00000187954.12	891.992	2.25897	0.326569	6.91727	4.60443e-12	1.24142e-10	CYHR1	protein_coding
ENSG00000167702.12	322.485	1.41396	0.354534	3.98823	6.65688e-05	0.00056668	KIFC2	protein_coding
ENSG00000167700.9	257.221	1.60628	0.333904	4.81061	1.50472e-06	1.80847e-05	MFSD3	protein_coding
ENSG00000107099.15	641.68	2.23719	0.26877	8.32382	8.51761e-17	3.70693e-15	DOCK8	protein_coding
ENSG00000107249.23	204.304	2.83958	0.348726	8.14272	3.86482e-16	1.56806e-14	GLIS3	protein_coding
ENSG00000230001.1	15.8409	3.56448	1.07571	3.31362	0.000920957	0.00568946	AL359095.1	sense_intronic
ENSG00000106686.16	216.948	1.28763	0.319579	4.02915	5.59799e-05	0.000485744	SPATA6L	protein_coding
ENSG00000107036.12	2373.88	1.04365	0.244843	4.26254	2.02113e-05	0.000193167	RIC1	protein_coding
ENSG00000099219.14	2353.24	-1.00572	0.26697	-3.76718	0.000165099	0.00125857	ERMP1	protein_coding
ENSG00000137033.11	225.66	5.32337	0.476617	11.1691	5.77825e-29	5.52669e-27	IL33	protein_coding
ENSG00000178445.9	4747.97	-1.04683	0.241369	-4.33707	1.44393e-05	0.000142496	GLDC	protein_coding
ENSG00000236924.1	84.1803	-1.8607	0.433484	-4.29243	1.76725e-05	0.000171775	AL162411.1	lincRNA
ENSG00000232946.1	19.492	-2.14811	0.810075	-2.65174	0.00800773	0.0350497	AL354707.3	processed_pseudogene
ENSG00000224972.1	37.8952	1.46287	0.581916	2.51389	0.0119409	0.0488492	AL513412.1	sense_intronic
ENSG00000107165.12	78.4535	4.48514	0.58684	7.64286	2.12444e-14	7.22167e-13	TYRP1	protein_coding
ENSG00000153714.6	325.607	-1.45543	0.306965	-4.74133	2.12317e-06	2.49223e-05	LURAP1L	protein_coding
ENSG00000164946.19	4628.1	-3.69688	0.259197	-14.2628	3.73152e-46	8.30677e-44	FREM1	protein_coding
ENSG00000155158.20	1378.43	-3.2149	0.261674	-12.2859	1.07805e-34	1.34917e-32	TTC39B	protein_coding
ENSG00000164985.15	2464.71	-1.37331	0.270691	-5.07335	3.90881e-07	5.28635e-06	PSIP1	protein_coding
ENSG00000147874.11	3963.29	-1.36689	0.257003	-5.31858	1.04578e-07	1.56122e-06	HAUS6	protein_coding
ENSG00000285911.1	14.3851	7.36354	1.67602	4.39346	1.11559e-05	0.000112701	AL391834.3	bidirectional_promoter_lncRNA
ENSG00000177076.6	1749.56	4.84384	0.265427	18.2492	2.09857e-74	1.28755e-71	ACER2	protein_coding
ENSG00000260912.1	988.698	4.767	0.309387	15.4079	1.44867e-53	4.09452e-51	AL158206.1	sense_overlapping
ENSG00000147889.17	356.24	-4.07674	0.366563	-11.1215	9.85811e-29	9.32258e-27	CDKN2A	protein_coding
ENSG00000240498.8	78.7512	-3.01604	0.496894	-6.06979	1.28075e-09	2.5712e-08	CDKN2B-AS1	antisense
ENSG00000235453.10	94.5784	-1.24543	0.438601	-2.83955	0.0045177	0.0218041	SMIM27	protein_coding
ENSG00000236184.1	61.6673	1.61793	0.478117	3.38397	0.000714452	0.00458939	TCEA1P4	processed_pseudogene
ENSG00000225693.1	43.8212	1.47971	0.577024	2.56438	0.0103361	0.0434138	LAGE3P1	processed_pseudogene
ENSG00000086062.12	2735.25	-1.4511	0.251964	-5.75916	8.45338e-09	1.50492e-07	B4GALT1	protein_coding
[truncated: 2,669 more rows]

## Sheet: WT+ vs WT- (protein)
Gene	BaseMean	log2FoldChange	lfcSE	stat	pvalue	padj	GeneName	GeneType
ENSG00000187634.12	16.9897	-2.66664	0.911235	-2.92641	0.00342903	0.012848	SAMD11	protein_coding
ENSG00000187961.14	381.375	-1.43169	0.275076	-5.2047	1.94311e-07	1.88212e-06	KLHL17	protein_coding
ENSG00000187642.9	123.824	6.56915	0.72752	9.0295	1.72452e-19	6.29867e-18	PERM1	protein_coding
ENSG00000188290.10	107.32	-1.54471	0.395264	-3.90805	9.30455e-05	0.000537007	HES4	protein_coding
ENSG00000131591.17	345.576	-1.05369	0.254341	-4.1428	3.43084e-05	0.000217193	C1orf159	protein_coding
ENSG00000162572.20	80.3535	1.31352	0.443389	2.96245	0.00305199	0.0116321	SCNN1D	protein_coding
ENSG00000169972.12	486.042	-1.16479	0.258844	-4.49995	6.79679e-06	4.98632e-05	PUSL1	protein_coding
ENSG00000169962.5	24.9488	1.76181	0.696702	2.52878	0.011446	0.0355935	TAS1R3	protein_coding
ENSG00000107404.20	2439.75	-1.72908	0.219036	-7.89404	2.92558e-15	7.49889e-14	DVL1	protein_coding
ENSG00000162576.16	517.666	-1.33491	0.265747	-5.02323	5.08105e-07	4.58573e-06	MXRA8	protein_coding
ENSG00000235098.8	1151.71	2.04736	0.243245	8.41689	3.86616e-17	1.16271e-15	ANKRD65	protein_coding
ENSG00000179403.12	1768.88	-1.88528	0.243475	-7.74321	9.69394e-15	2.34124e-13	VWA1	protein_coding
ENSG00000215915.9	163.876	1.30109	0.338007	3.8493	0.000118455	0.000667539	ATAD3C	protein_coding
ENSG00000160072.19	1352.26	-1.50737	0.22336	-6.74861	1.49271e-11	2.57579e-10	ATAD3B	protein_coding
ENSG00000197785.13	1234.16	-1.64209	0.228999	-7.17073	7.45997e-13	1.50564e-11	ATAD3A	protein_coding
ENSG00000197530.12	2419.12	1.60247	0.197546	8.1119	4.98355e-16	1.36607e-14	MIB2	protein_coding
ENSG00000169885.10	19.8721	4.18592	1.01666	4.11731	3.83313e-05	0.000240041	CALML6	protein_coding
ENSG00000142609.18	65.3992	1.85406	0.4581	4.04728	5.18157e-05	0.000316056	CFAP74	protein_coding
ENSG00000197921.6	12.8753	2.8631	1.09801	2.60755	0.00911932	0.0294366	HES5	protein_coding
ENSG00000157873.17	1130.43	2.25029	0.222072	10.1331	3.93834e-24	2.05571e-22	TNFRSF14	protein_coding
ENSG00000157870.16	616.871	-1.60887	0.228507	-7.0408	1.91139e-12	3.65728e-11	PRXL2B	protein_coding
ENSG00000130762.15	762.81	-1.45164	0.236569	-6.13624	8.44965e-10	1.16042e-08	ARHGEF16	protein_coding
ENSG00000158109.15	1031.63	-1.11395	0.227548	-4.89546	9.80744e-07	8.43508e-06	TPRG1L	protein_coding
ENSG00000078900.15	89.8171	1.08648	0.410522	2.64659	0.00813088	0.0267304	TP73	protein_coding
ENSG00000169598.15	230.004	-2.02049	0.292031	-6.91875	4.55661e-12	8.32689e-11	DFFB	protein_coding
ENSG00000198912.11	773.899	-1.38588	0.228686	-6.06018	1.35971e-09	1.81875e-08	C1orf174	protein_coding
ENSG00000131697.18	992.799	-1.0594	0.220608	-4.80218	1.5695e-06	1.30022e-05	NPHP4	protein_coding
ENSG00000116254.18	215.482	4.27281	0.361436	11.8217	3.01344e-32	2.66582e-30	CHD5	protein_coding
ENSG00000158286.13	343.526	-1.49242	0.245795	-6.07178	1.265e-09	1.69908e-08	RNF207	protein_coding
ENSG00000116237.16	3232.9	-1.403	0.214171	-6.55085	5.72087e-11	9.22893e-10	ICMT	protein_coding
ENSG00000158292.7	189.549	2.70022	0.319445	8.45285	2.84274e-17	8.67371e-16	GPR153	protein_coding
ENSG00000069812.11	168.279	4.42906	0.408527	10.8415	2.18798e-27	1.42622e-25	HES2	protein_coding
ENSG00000187017.16	1473.14	-1.16748	0.217606	-5.36511	8.09015e-08	8.33078e-07	ESPN	protein_coding
ENSG00000215788.10	54.1007	1.83075	0.500482	3.65796	0.000254228	0.00131466	TNFRSF25	protein_coding
ENSG00000171680.21	508.777	1.23343	0.247636	4.98084	6.33079e-07	5.60595e-06	PLEKHG5	protein_coding
ENSG00000049246.14	301.215	-1.65682	0.261236	-6.34225	2.26435e-10	3.32776e-09	PER3	protein_coding
ENSG00000049249.8	7.3742	4.78806	1.83861	2.60417	0.00920972	0.0296546	TNFRSF9	protein_coding
ENSG00000074800.15	56426.8	-1.0039	0.197387	-5.08596	3.65772e-07	3.38295e-06	ENO1	protein_coding
ENSG00000142583.17	34.101	8.48913	1.55081	5.47398	4.4003e-08	4.75774e-07	SLC2A5	protein_coding
ENSG00000180758.12	757.77	-1.31183	0.227845	-5.75758	8.53261e-09	1.02282e-07	GPR157	protein_coding
ENSG00000173614.14	304.294	1.55832	0.256897	6.06594	1.31183e-09	1.75989e-08	NMNAT1	protein_coding
ENSG00000116649.10	2237.83	-1.72093	0.215319	-7.99247	1.32257e-15	3.48511e-14	SRM	protein_coding
ENSG00000120942.13	1272.15	-1.05522	0.207714	-5.08015	3.77143e-07	3.47751e-06	UBIAD1	protein_coding
ENSG00000204624.8	14.5122	3.70132	1.09644	3.37575	0.000736154	0.00338132	DISP3	protein_coding
ENSG00000116661.11	2790.14	1.18911	0.208849	5.69364	1.24358e-08	1.45926e-07	FBXO2	protein_coding
ENSG00000132879.14	1080.14	1.20156	0.224503	5.35207	8.69529e-08	8.88341e-07	FBXO44	protein_coding
ENSG00000116663.11	106.386	-1.35325	0.386734	-3.49917	0.000466707	0.00225228	FBXO6	protein_coding
ENSG00000116670.15	709.232	-1.54332	0.249628	-6.18248	6.31008e-10	8.78543e-09	MAD2L2	protein_coding
ENSG00000162490.7	370.428	8.15998	0.688648	11.8493	2.17071e-32	1.94725e-30	DRAXIN	protein_coding
ENSG00000177674.16	1137.36	1.39322	0.241807	5.76168	8.32808e-09	1.00051e-07	AGTRAP	protein_coding
ENSG00000215910.7	7.96286	6.38737	1.84091	3.46968	0.00052107	0.00248688	C1orf167	protein_coding
ENSG00000011021.23	1821.77	-1.21169	0.186741	-6.48861	8.66305e-11	1.36047e-09	CLCN6	protein_coding
ENSG00000116685.16	2703.63	-1.71556	0.212638	-8.068	7.14618e-16	1.93743e-14	KIAA2013	protein_coding
ENSG00000083444.17	5469.81	-1.53259	0.193537	-7.91886	2.39699e-15	6.19647e-14	PLOD1	protein_coding
ENSG00000116691.11	437.731	-1.67582	0.253691	-6.60576	3.95484e-11	6.52681e-10	MIIP	protein_coding
ENSG00000162494.6	20.73	7.76674	1.62669	4.77457	1.80089e-06	1.47202e-05	LRRC38	protein_coding
ENSG00000171729.14	645.381	-1.86899	0.241691	-7.73299	1.05053e-14	2.52193e-13	TMEM51	protein_coding
ENSG00000142621.19	12.891	2.8729	1.03739	2.76934	0.005617	0.0196158	FHAD1	protein_coding
ENSG00000142634.13	912.262	-1.20316	0.231631	-5.19431	2.05485e-07	1.9833e-06	EFHD2	protein_coding
ENSG00000116771.6	3232.68	-1.65076	0.202801	-8.13982	3.95881e-16	1.09397e-14	AGMAT	protein_coding
ENSG00000162461.8	12.6008	4.54141	1.35956	3.34036	0.000836698	0.00377442	SLC25A34	protein_coding
ENSG00000162458.13	1311.18	-1.44372	0.214646	-6.72603	1.74356e-11	2.98973e-10	FBLIM1	protein_coding
ENSG00000132881.12	32.4775	1.49555	0.614074	2.43545	0.0148731	0.0442314	CPLANE2	protein_coding
ENSG00000187144.11	94.2519	1.59409	0.404422	3.94165	8.09245e-05	0.000473877	SPATA21	protein_coding
ENSG00000219481.10	8362.34	1.44785	0.170049	8.51429	1.67621e-17	5.23158e-16	NBPF1	protein_coding
ENSG00000058453.17	579.569	1.65789	0.231319	7.16711	7.65951e-13	1.54135e-11	CROCC	protein_coding
ENSG00000142623.11	4.91903	5.69636	2.04193	2.7897	0.00527568	0.0185599	PADI1	protein_coding
ENSG00000142619.4	208.314	8.65116	1.06029	8.15925	3.37125e-16	9.34449e-15	PADI3	protein_coding
ENSG00000159339.13	1798.97	9.76482	0.546512	17.8676	2.11052e-71	1.06491e-68	PADI4	protein_coding
ENSG00000276747.1	5.02774	5.72499	2.02926	2.82123	0.00478406	0.0170773	PADI6	protein_coding
ENSG00000179023.8	1635.1	4.65937	0.212805	21.895	2.89871e-106	4.38783e-103	KLHDC7A	protein_coding
ENSG00000159423.17	1582.56	-1.41346	0.205409	-6.88119	5.93525e-12	1.06886e-10	ALDH4A1	protein_coding
ENSG00000053372.5	1883.02	-1.58137	0.207217	-7.63147	2.32094e-14	5.42822e-13	MRTO4	protein_coding
ENSG00000173436.15	322.869	1.01	0.257545	3.92162	8.79547e-05	0.000510872	MICOS10	protein_coding
ENSG00000158747.14	351.23	-1.53039	0.291345	-5.25285	1.49764e-07	1.47528e-06	NBL1	protein_coding
ENSG00000188257.11	2089.34	-1.44	0.228385	-6.30514	2.87928e-10	4.18409e-09	PLA2G2A	protein_coding
ENSG00000162545.6	3509.8	-1.76865	0.179657	-9.84458	7.2338e-23	3.43978e-21	CAMK2N1	protein_coding
ENSG00000158825.6	36.6842	1.84505	0.589111	3.13193	0.00173662	0.00715093	CDA	protein_coding
ENSG00000158828.8	803.199	1.2549	0.230318	5.44854	5.07841e-08	5.42846e-07	PINK1	protein_coding
[truncated: 4,488 more rows]

## Sheet: WT+ vs KO+ (protein)
Gene	BaseMean	log2FoldChange	lfcSE	stat	pvalue	padj	GeneName	GeneType
[truncated: 3,330 more rows]

[truncated: 1 more sheets: 2012 overlapped proteins]
