# Supplementary material for: TP53-inducible putative long noncoding RNAs encode functional polypeptides that suppress cell proliferation
Source: HighWire-hosted journal article supplement (doi:10.1101/gr.275831.121), 2022-05-24
Supplement: Supplemental_Table_S2.xlsx [file Supplemental_Table_S2.xlsx]

## Sheet: README
Supplemental Table S2: TP53-regulated genes in response to DNA damage identified by the RNA-seq integrative analysis.
An integrative analysis of all four RNA-seq data sets (WT ADR+; WT ADR-; TP53-/--ADR+; TP53-/--ADR-) was performed using the modeling framework from DESeq2 suitable for two conditions, two genotypes and an interaction term
The table below indicates figures that the other tabs are corresponding to.
tab name	Figure
ADR effect for wt (protein)	S2D
ADR effect for wt vs KO protein	S2D
TP53-dependent proteins	S2E
ADR effect for wt (lncRNA)	S3B
ADR effect for wt vs KO (lncRNA	S3B
TP53-dependent lncRNAs	S3C

## Sheet: ADR effect for wt  (protein)
Gene	BaseMean	log2FoldChange	lfcSE	stat	pvalue	padj	GeneName	GeneType
ENSG00000187634.12	11.3942	-2.59859	1.02128	-2.54445	0.0109451	0.0378199	SAMD11	protein_coding
ENSG00000187961.14	356.981	-1.3529	0.360524	-3.75258	0.000175021	0.00115328	KLHL17	protein_coding
ENSG00000187642.9	64.7985	6.59022	0.771293	8.54437	1.29236e-17	6.52826e-16	PERM1	protein_coding
ENSG00000188290.10	75.3367	-1.55085	0.438187	-3.53923	0.000401289	0.00236832	HES4	protein_coding
ENSG00000131591.17	330.76	-1.01924	0.283748	-3.59206	0.000328075	0.00199528	C1orf159	protein_coding
ENSG00000162572.20	56.2124	1.34134	0.485785	2.76118	0.00575925	0.0224695	SCNN1D	protein_coding
ENSG00000169972.12	412.851	-1.13829	0.33038	-3.44541	0.000570184	0.00320426	PUSL1	protein_coding
ENSG00000169962.5	20.63	1.93859	0.700772	2.76636	0.00566851	0.0221798	TAS1R3	protein_coding
ENSG00000107404.20	2017.71	-1.68442	0.293313	-5.74273	9.31614e-09	1.54736e-07	DVL1	protein_coding
ENSG00000162576.16	481.998	-1.28431	0.337798	-3.802	0.000143533	0.000970733	MXRA8	protein_coding
ENSG00000235098.8	643.079	2.0953	0.306403	6.83837	8.00993e-12	2.02878e-10	ANKRD65	protein_coding
ENSG00000179403.12	1365.18	-1.84918	0.342754	-5.39506	6.85012e-08	9.73773e-07	VWA1	protein_coding
ENSG00000215915.9	102.765	1.28528	0.413322	3.10963	0.00187323	0.00884823	ATAD3C	protein_coding
ENSG00000160072.19	1437.97	-1.54781	0.29082	-5.32223	1.025e-07	1.41235e-06	ATAD3B	protein_coding
ENSG00000197785.13	1276.42	-1.67293	0.287959	-5.80959	6.26247e-09	1.07054e-07	ATAD3A	protein_coding
ENSG00000197530.12	1669.16	1.64577	0.259315	6.34663	2.20082e-10	4.66941e-09	MIB2	protein_coding
ENSG00000169885.10	10.8625	4.18858	1.12622	3.71913	0.000199908	0.00129882	CALML6	protein_coding
ENSG00000142609.18	41.7031	1.72383	0.529714	3.25426	0.00113687	0.00579939	CFAP74	protein_coding
ENSG00000197921.6	6.93015	2.90114	1.32049	2.19701	0.0280196	0.0795592	HES5	protein_coding
ENSG00000157873.17	634.395	2.29915	0.296148	7.76351	8.26131e-15	3.00984e-13	TNFRSF14	protein_coding
ENSG00000157870.16	619.257	-1.56503	0.28235	-5.54288	2.97537e-08	4.55423e-07	PRXL2B	protein_coding
ENSG00000130762.15	689.339	-1.41681	0.280126	-5.05776	4.24203e-07	5.14702e-06	ARHGEF16	protein_coding
ENSG00000158109.15	1174.16	-1.07944	0.259854	-4.154	3.26714e-05	0.000263525	TPRG1L	protein_coding
ENSG00000078900.15	62.1918	1.10598	0.44391	2.49144	0.0127225	0.0426736	TP73	protein_coding
ENSG00000169598.15	238.828	-1.98712	0.335825	-5.91712	3.27623e-09	5.8767e-08	DFFB	protein_coding
ENSG00000198912.11	879.689	-1.34948	0.239914	-5.62484	1.85675e-08	2.92346e-07	C1orf174	protein_coding
ENSG00000131697.18	1136.74	-1.01826	0.281033	-3.62328	0.000290893	0.00179757	NPHP4	protein_coding
ENSG00000116254.18	131.151	4.33632	0.430113	10.0818	6.64923e-24	5.71961e-22	CHD5	protein_coding
ENSG00000158286.13	348.357	-1.44008	0.33394	-4.31238	1.61503e-05	0.000139727	RNF207	protein_coding
ENSG00000116237.16	3518.15	-1.3655	0.242325	-5.63498	1.75082e-08	2.768e-07	ICMT	protein_coding
ENSG00000158292.7	126.251	2.76273	0.39063	7.0725	1.52162e-12	4.20616e-11	GPR153	protein_coding
ENSG00000069812.11	89.0719	4.51526	0.476864	9.46866	2.83455e-21	1.94192e-19	HES2	protein_coding
ENSG00000187017.16	1157.37	-1.17009	0.302343	-3.87007	0.000108804	0.00075853	ESPN	protein_coding
ENSG00000215788.10	41.9031	1.90683	0.616733	3.09182	0.00198935	0.00930043	TNFRSF25	protein_coding
ENSG00000171680.21	387.784	1.2809	0.315754	4.05664	4.97827e-05	0.000380781	PLEKHG5	protein_coding
ENSG00000173662.21	43.2942	1.34202	0.550339	2.43852	0.0147474	0.047896	TAS1R1	protein_coding
ENSG00000049246.14	252.206	-1.60425	0.271515	-5.90851	3.4521e-09	6.15933e-08	PER3	protein_coding
ENSG00000049249.8	9.36404	4.77409	1.70784	2.79539	0.00518367	0.0206088	TNFRSF9	protein_coding
ENSG00000162426.14	9.00968	3.2195	1.30992	2.45779	0.0139794	0.0458667	SLC45A1	protein_coding
ENSG00000142583.17	19.3131	8.51721	1.59911	5.32621	1.00283e-07	1.38392e-06	SLC2A5	protein_coding
ENSG00000180758.12	735.151	-1.26824	0.272006	-4.66253	3.12339e-06	3.15551e-05	GPR157	protein_coding
ENSG00000173614.14	295.67	1.55888	0.334765	4.65664	3.21416e-06	3.24113e-05	NMNAT1	protein_coding
ENSG00000175262.14	2.7229	4.81825	2.26793	2.12451	0.0336274	0.0913626	C1orf127	protein_coding
ENSG00000116649.10	2416.16	-1.68751	0.288091	-5.85756	4.69713e-09	8.19077e-08	SRM	protein_coding
ENSG00000120942.13	1369.45	-1.00889	0.22861	-4.41315	1.01877e-05	9.21374e-05	UBIAD1	protein_coding
ENSG00000204624.8	12.2983	3.719	1.0691	3.47864	0.000503964	0.00288512	DISP3	protein_coding
ENSG00000116661.11	2419.4	1.23157	0.265041	4.64674	3.37224e-06	3.38268e-05	FBXO2	protein_coding
ENSG00000132879.14	845.589	1.23475	0.293872	4.20168	2.64945e-05	0.00021768	FBXO44	protein_coding
ENSG00000116663.11	109.783	-1.29634	0.442935	-2.92671	0.00342568	0.0145915	FBXO6	protein_coding
ENSG00000116670.15	742.037	-1.5003	0.30453	-4.92661	8.367e-07	9.4772e-06	MAD2L2	protein_coding
ENSG00000162490.7	189.549	8.16056	0.716696	11.3864	4.88991e-30	6.48552e-28	DRAXIN	protein_coding
ENSG00000177674.16	872.526	1.43804	0.330203	4.355	1.33064e-05	0.000117347	AGTRAP	protein_coding
ENSG00000215910.7	4.9562	6.43604	1.97384	3.26067	0.00111149	0.00568715	C1orf167	protein_coding
ENSG00000011021.23	1814.5	-1.18215	0.237684	-4.9736	6.57199e-07	7.62363e-06	CLCN6	protein_coding
ENSG00000116685.16	2860.86	-1.68224	0.268443	-6.26667	3.68859e-10	7.58682e-09	KIAA2013	protein_coding
ENSG00000083444.17	5095.91	-1.49913	0.276092	-5.4298	5.64166e-08	8.17525e-07	PLOD1	protein_coding
ENSG00000116691.11	478.509	-1.63879	0.306526	-5.34635	8.97452e-08	1.25262e-06	MIIP	protein_coding
ENSG00000171729.14	671.975	-1.84458	0.268971	-6.85792	6.98689e-12	1.78647e-10	TMEM51	protein_coding
ENSG00000142621.19	16.7841	2.88433	0.922134	3.12788	0.00176069	0.00839619	FHAD1	protein_coding
ENSG00000142634.13	918.28	-1.17274	0.295334	-3.97089	7.1605e-05	0.000525311	EFHD2	protein_coding
ENSG00000116771.6	3528.93	-1.61852	0.224476	-7.21019	5.58753e-13	1.62989e-11	AGMAT	protein_coding
ENSG00000162461.8	9.20559	4.52525	1.37718	3.28589	0.00101662	0.00527798	SLC25A34	protein_coding
ENSG00000162458.13	1111.01	-1.40589	0.299066	-4.70093	2.58981e-06	2.66646e-05	FBLIM1	protein_coding
ENSG00000173641.17	3.5987	4.52373	2.08771	2.16683	0.0302475	0.0843745	HSPB7	protein_coding
ENSG00000132881.12	25.1434	1.53352	0.632017	2.42639	0.0152499	0.0491959	CPLANE2	protein_coding
ENSG00000187144.11	131.847	1.71312	0.456639	3.75158	0.000175726	0.00115735	SPATA21	protein_coding
ENSG00000219481.10	3414.99	1.39577	0.199614	6.99238	2.70256e-12	7.24738e-11	NBPF1	protein_coding
ENSG00000058453.17	416.343	1.70788	0.304388	5.61088	2.01304e-08	3.15294e-07	CROCC	protein_coding
ENSG00000142623.11	2.54265	5.65723	2.43896	2.31953	0.0203664	0.0618292	PADI1	protein_coding
ENSG00000142619.4	107.654	8.66359	1.08356	7.99546	1.29088e-15	5.18741e-14	PADI3	protein_coding
ENSG00000159339.13	936.029	10.2069	0.639764	15.9542	2.66262e-57	1.28015e-54	PADI4	protein_coding
ENSG00000276747.1	2.78049	5.61089	2.32993	2.40818	0.0160323	0.0511267	PADI6	protein_coding
ENSG00000117148.8	10.7759	-2.49219	1.09536	-2.27523	0.0228921	0.0678424	ACTL8	protein_coding
ENSG00000179023.8	861.37	4.70392	0.2814	16.7161	1.00004e-62	7.04826e-60	KLHDC7A	protein_coding
ENSG00000159423.17	1360.74	-1.3787	0.269148	-5.12244	3.01602e-07	3.77866e-06	ALDH4A1	protein_coding
ENSG00000053372.5	2121.54	-1.55574	0.238118	-6.5335	6.42521e-11	1.46108e-09	MRTO4	protein_coding
ENSG00000173436.15	304.215	1.06242	0.316575	3.35599	0.000790813	0.00426434	MICOS10	protein_coding
ENSG00000158747.14	388.862	-1.47037	0.366224	-4.01496	5.94556e-05	0.000446522	NBL1	protein_coding
ENSG00000188257.11	1267.89	-1.40729	0.263764	-5.33543	9.53198e-08	1.32084e-06	PLA2G2A	protein_coding
ENSG00000162545.6	4354.08	-1.73706	0.209684	-8.28419	1.18918e-16	5.37208e-15	CAMK2N1	protein_coding
ENSG00000158825.6	29.8951	1.78133	0.655	2.71959	0.00653627	0.0249541	CDA	protein_coding
ENSG00000158828.8	732.446	1.30962	0.286122	4.57714	4.71376e-06	4.56523e-05	PINK1	protein_coding
ENSG00000117245.12	84.0346	2.51821	0.461475	5.45687	4.84593e-08	7.16879e-07	KIF17	protein_coding
ENSG00000162551.14	924.999	3.38338	0.251814	13.4361	3.71661e-41	8.77773e-39	ALPL	protein_coding
ENSG00000142798.20	11666.1	1.86403	0.329988	5.64879	1.61584e-08	2.57578e-07	HSPG2	protein_coding
ENSG00000133216.16	19.8397	4.09191	0.973044	4.20527	2.60776e-05	0.000214517	EPHB2	protein_coding
ENSG00000227868.6	3.00116	4.98757	2.24596	2.22068	0.0263725	0.075982	TEX46	protein_coding
ENSG00000179546.4	50.8028	1.71684	0.794426	2.16111	0.0306871	0.0853093	HTR1D	protein_coding
ENSG00000125945.15	512.133	1.06053	0.292637	3.62405	0.000290031	0.00179265	ZNF436	protein_coding
ENSG00000007968.7	877.692	-1.2752	0.284467	-4.48276	7.36849e-06	6.8909e-05	E2F2	protein_coding
ENSG00000011009.11	3352.16	1.32325	0.282388	4.68592	2.78702e-06	2.8499e-05	LYPLA2	protein_coding
ENSG00000117305.15	554.289	1.48054	0.251871	5.87819	4.14784e-09	7.29129e-08	HMGCL	protein_coding
ENSG00000179163.11	884.974	1.05832	0.254286	4.16192	3.15589e-05	0.000255316	FUCA1	protein_coding
ENSG00000142677.4	197.868	-1.05768	0.38352	-2.75782	0.00581886	0.0226791	IL22RA1	protein_coding
ENSG00000158055.15	176.72	11.8231	1.47792	7.99983	1.24591e-15	5.02169e-14	GRHL3	protein_coding
ENSG00000184454.7	63.5959	-3.65189	0.697818	-5.2333	1.66509e-07	2.18368e-06	NCMAP	protein_coding
ENSG00000169504.15	6946.3	-1.28143	0.25174	-5.09028	3.57527e-07	4.41765e-06	CLIC4	protein_coding
ENSG00000187010.21	4.19793	4.75207	2.02585	2.34572	0.0189905	0.0585482	RHD	protein_coding
ENSG00000188672.18	11.4422	3.6525	1.05674	3.45639	0.000547453	0.00309656	RHCE	protein_coding
ENSG00000117643.14	37.2744	4.24815	0.697328	6.09204	1.1148e-09	2.15711e-08	MAN1C1	protein_coding
ENSG00000182749.5	1223.3	1.0512	0.244642	4.29691	1.73198e-05	0.000148889	PAQR7	protein_coding
ENSG00000158022.6	11.1499	7.82071	1.7186	4.55062	5.3489e-06	5.11958e-05	TRIM63	protein_coding
ENSG00000176083.17	8.14102	7.37582	1.80375	4.08916	4.32942e-05	0.000336505	ZNF683	protein_coding
ENSG00000131914.11	5.18858	4.18588	1.96383	2.13148	0.0330493	0.0902432	LIN28A	protein_coding
ENSG00000117676.14	1787.43	1.37241	0.276126	4.97023	6.68729e-07	7.74037e-06	RPS6KA1	protein_coding
ENSG00000204160.12	1171.68	-1.21584	0.280059	-4.34138	1.41592e-05	0.000123937	ZDHHC18	protein_coding
ENSG00000175793.12	1067.37	2.14227	0.319953	6.69557	2.14825e-11	5.19206e-10	SFN	protein_coding
ENSG00000131910.5	2642.76	2.08229	0.268092	7.76707	8.03203e-15	2.93028e-13	NR0B2	protein_coding
ENSG00000090020.11	1351.24	1.40465	0.262047	5.36031	8.30793e-08	1.16562e-06	SLC9A1	protein_coding
ENSG00000142765.18	1142.11	3.77873	0.301037	12.5524	3.85807e-36	7.31512e-34	SYTL1	protein_coding
ENSG00000174950.11	3.02885	5.48671	2.13316	2.57211	0.0101082	0.0355568	CD164L2	protein_coding
ENSG00000181773.7	296.177	2.0627	0.315703	6.53368	6.41736e-11	1.46053e-09	GPR3	protein_coding
ENSG00000126705.14	1634.18	1.49833	0.321585	4.6592	3.17438e-06	3.20461e-05	AHDC1	protein_coding
ENSG00000000938.13	2.84206	5.26827	2.23513	2.35704	0.0184215	0.057051	FGR	protein_coding
ENSG00000126709.15	836.184	2.64447	0.274654	9.62837	6.06865e-22	4.39227e-20	IFI6	protein_coding
ENSG00000117758.14	946.383	1.96792	0.294789	6.67569	2.46069e-11	5.88904e-10	STX12	protein_coding
ENSG00000169403.12	135.694	5.5606	0.464311	11.976	4.74503e-33	7.83773e-31	PTAFR	protein_coding
ENSG00000130766.5	1957.17	1.81147	0.276322	6.55567	5.5393e-11	1.26712e-09	SESN2	protein_coding
ENSG00000180198.16	3289.71	-1.6424	0.25621	-6.41038	1.45161e-10	3.13921e-09	RCC1	protein_coding
ENSG00000120656.11	354.543	1.58884	0.253762	6.26116	3.82125e-10	7.83574e-09	TAF12	protein_coding
ENSG00000116329.11	86.1077	1.01005	0.449482	2.24715	0.0246306	0.0720271	OPRD1	protein_coding
ENSG00000060656.20	4542.92	1.21309	0.296534	4.09091	4.29684e-05	0.000334455	PTPRU	protein_coding
ENSG00000162511.8	745.489	7.27505	0.338187	21.5119	1.20433e-102	4.76621e-99	LAPTM5	protein_coding
ENSG00000060688.13	2210.4	-1.17729	0.216668	-5.43359	5.523e-08	8.03009e-07	SNRNP40	protein_coding
ENSG00000121764.11	5.90673	6.46368	1.8913	3.41759	0.000631785	0.00350943	HCRTR1	protein_coding
ENSG00000084636.18	989.211	-1.0471	0.339076	-3.08809	0.00201449	0.00938862	COL16A1	protein_coding
ENSG00000121753.12	33.0865	5.3514	0.909777	5.8821	4.05084e-09	7.15044e-08	ADGRB2	protein_coding
ENSG00000134668.12	16.5084	3.52456	0.925259	3.80927	0.000139377	0.000945471	SPOCD1	protein_coding
ENSG00000121775.18	354.123	-1.83108	0.301104	-6.08124	1.19254e-09	2.29507e-08	TMEM39B	protein_coding
ENSG00000162526.7	78.0776	1.59973	0.446331	3.58418	0.000338143	0.00204588	TSSK3	protein_coding
ENSG00000273274.2	8.88515	2.68545	1.23341	2.17725	0.0294618	0.0826624	ZBTB8B	protein_coding
ENSG00000116514.16	1327.47	2.02003	0.20921	9.65553	4.65742e-22	3.39828e-20	RNF19B	protein_coding
ENSG00000121904.17	10.4951	5.4738	1.71123	3.19875	0.00138026	0.00683882	CSMD2	protein_coding
ENSG00000189280.3	3.7281	6.21517	2.19228	2.83502	0.00458224	0.0185941	GJB5	protein_coding
ENSG00000116544.12	19.2686	1.57526	0.784014	2.00922	0.0445134	0.113525	DLGAP3	protein_coding
ENSG00000196182.10	3215.49	-1.13158	0.275116	-4.11308	3.90408e-05	0.00030708	STK40	protein_coding
ENSG00000181817.6	638.609	-1.14634	0.305362	-3.75402	0.000174018	0.00114751	LSM10	protein_coding
ENSG00000116885.18	34.8513	2.63781	0.60903	4.33117	1.48317e-05	0.00012919	OSCP1	protein_coding
ENSG00000119535.17	236.036	1.11659	0.297342	3.75524	0.000173176	0.00114363	CSF3R	protein_coding
ENSG00000163873.10	2.94899	4.83682	2.2089	2.1897	0.0285459	0.0806474	GRIK3	protein_coding
ENSG00000163879.11	32.0617	2.13666	0.692413	3.08581	0.00202996	0.00944438	DNALI1	protein_coding
ENSG00000183317.17	24.0533	3.08839	0.704839	4.38169	1.17761e-05	0.00010537	EPHA10	protein_coding
ENSG00000185090.14	927.428	-2.74278	0.285632	-9.6025	7.8029e-22	5.58737e-20	MANEAL	protein_coding
ENSG00000185668.7	95.3294	5.86286	0.562711	10.419	2.03168e-25	1.99638e-23	POU3F1	protein_coding
ENSG00000158315.11	149.432	-2.77833	0.381726	-7.27835	3.37935e-13	1.02693e-11	RHBDL2	protein_coding
ENSG00000183682.8	42.34	5.41642	0.737429	7.345	2.05752e-13	6.47157e-12	BMP8A	protein_coding
ENSG00000116985.12	126.867	1.804	0.342696	5.26412	1.4086e-07	1.88349e-06	BMP8B	protein_coding
ENSG00000116990.11	43.9325	1.16143	0.515882	2.25135	0.0243634	0.0713932	MYCL	protein_coding
ENSG00000049089.15	2267.16	1.41807	0.297382	4.76852	1.85584e-06	1.94954e-05	COL9A2	protein_coding
ENSG00000187801.15	264.426	-2.46903	0.339892	-7.26418	3.75305e-13	1.13155e-11	ZFP69B	protein_coding
ENSG00000179862.6	202.37	1.30054	0.325218	3.99899	6.36147e-05	0.0004734	CITED4	protein_coding
ENSG00000010803.16	2060.08	-1.29719	0.240322	-5.39772	6.74928e-08	9.6096e-07	SCMH1	protein_coding
ENSG00000204060.7	7.04764	2.47399	1.17062	2.11341	0.0345655	0.0934492	FOXO6	protein_coding
ENSG00000044012.4	120.007	9.82192	1.48029	6.63512	3.24229e-11	7.66421e-10	GUCA2B	protein_coding
ENSG00000197273.4	8.61463	2.75383	1.13052	2.43589	0.0148551	0.0481357	GUCA2A	protein_coding
ENSG00000177181.15	223.842	-2.49672	0.30618	-8.15439	3.50942e-16	1.50219e-14	RIMKLA	protein_coding
ENSG00000066185.13	11.0672	2.01685	0.948758	2.12578	0.0335218	0.0911566	ZMYND12	protein_coding
ENSG00000117394.21	28790.5	-1.71797	0.226514	-7.58441	3.34012e-14	1.12693e-12	SLC2A1	protein_coding
ENSG00000186973.11	27.5563	2.02522	0.628515	3.22223	0.00127196	0.00638447	FAM183A	protein_coding
ENSG00000243710.7	13.5465	2.64341	0.950438	2.78125	0.00541503	0.0213618	CFAP57	protein_coding
ENSG00000253313.5	36.9709	3.78244	0.678942	5.57108	2.53161e-08	3.91955e-07	C1orf210	protein_coding
ENSG00000132768.14	1340.21	-1.06065	0.239333	-4.4317	9.34935e-06	8.52717e-05	DPH2	protein_coding
ENSG00000159214.13	59.8548	1.08424	0.462309	2.34526	0.0190138	0.0586066	CCDC24	protein_coding
ENSG00000196517.11	455.658	-1.6373	0.314618	-5.20409	1.94953e-07	2.52352e-06	SLC6A9	protein_coding
ENSG00000187147.18	2363.47	-1.12902	0.254809	-4.43083	9.38704e-06	8.55864e-05	RNF220	protein_coding
ENSG00000126106.14	235.648	-1.73444	0.319216	-5.43345	5.52741e-08	8.0313e-07	TMEM53	protein_coding
ENSG00000173846.13	1095.25	2.63372	0.310875	8.47195	2.41322e-17	1.1678e-15	PLK3	protein_coding
ENSG00000222009.8	721.036	3.17062	0.259045	12.2397	1.90824e-34	3.44815e-32	BTBD19	protein_coding
ENSG00000132773.12	622.29	-1.10952	0.25383	-4.37111	1.23617e-05	0.000109917	TOE1	protein_coding
ENSG00000280670.3	191.115	-1.58799	0.315278	-5.03679	4.7341e-07	5.66745e-06	CCDC163	protein_coding
ENSG00000117448.13	2139.85	-1.04688	0.254825	-4.10825	3.9867e-05	0.000312847	AKR1A1	protein_coding
ENSG00000086015.21	2721.71	-1.59348	0.275404	-5.78598	7.20924e-09	1.21694e-07	MAST2	protein_coding
ENSG00000117461.15	329.029	1.04623	0.271986	3.84662	0.00011976	0.00082762	PIK3R3	protein_coding
ENSG00000117472.10	89.4266	4.19767	0.456549	9.19435	3.77253e-20	2.36213e-18	TSPAN1	protein_coding
ENSG00000171357.6	22.2231	7.24048	1.56773	4.61846	3.86607e-06	3.80864e-05	LURAP1	protein_coding
ENSG00000162456.9	2.5351	5.46259	2.40771	2.26879	0.0232813	0.0687988	KNCN	protein_coding
ENSG00000186377.8	4.08787	4.70884	2.06557	2.27968	0.0226268	0.0672782	CYP4X1	protein_coding
ENSG00000162366.8	13.0091	-5.64374	1.62215	-3.47918	0.000502949	0.00288115	PDZK1IP1	protein_coding
ENSG00000162367.11	10.3783	-2.34797	1.14112	-2.05761	0.039628	0.10392	TAL1	protein_coding
ENSG00000123473.15	1446.38	-1.10736	0.290981	-3.80562	0.000141447	0.000958069	STIL	protein_coding
ENSG00000117834.12	760.106	-2.99666	0.302854	-9.89472	4.38826e-23	3.42462e-21	SLC5A9	protein_coding
ENSG00000132122.12	174.302	1.07677	0.299691	3.59292	0.000326995	0.00199096	SPATA6	protein_coding
ENSG00000142700.12	12.2099	1.92986	0.898219	2.14854	0.0316708	0.0873672	DMRTA2	protein_coding
ENSG00000123080.11	341.389	-1.87768	0.317661	-5.91096	3.40118e-09	6.08461e-08	CDKN2C	protein_coding
ENSG00000085831.15	89.0593	1.6636	0.473064	3.51666	0.000437012	0.00255064	TTC39A	protein_coding
ENSG00000169213.7	521.909	1.60821	0.281392	5.7152	1.09575e-08	1.79453e-07	RAB3B	protein_coding
ENSG00000117862.12	466.04	-1.06503	0.303951	-3.50396	0.000458394	0.00266044	TXNDC12	protein_coding
ENSG00000157077.14	1478.03	-1.11173	0.243802	-4.55998	5.11577e-06	4.91391e-05	ZFYVE9	protein_coding
ENSG00000085840.13	1124.21	-1.31099	0.215984	-6.06986	1.28024e-09	2.44636e-08	ORC1	protein_coding
ENSG00000203995.9	7.16171	4.38377	1.49995	2.92261	0.00347116	0.0147596	ZYG11A	protein_coding
ENSG00000157184.7	885.805	1.92428	0.227773	8.44824	2.95731e-17	1.41677e-15	CPT2	protein_coding
ENSG00000157193.16	1516.15	-3.61024	0.227586	-15.8632	1.13903e-56	5.38021e-54	LRP8	protein_coding
ENSG00000211452.10	55.8388	-2.94379	0.543768	-5.41368	6.17409e-08	8.88462e-07	DIO1	protein_coding
ENSG00000203985.11	488.74	4.58189	0.307647	14.8933	3.64168e-50	1.30731e-47	LDLRAD1	protein_coding
ENSG00000116209.11	3002.71	1.19664	0.248896	4.80781	1.52594e-06	1.63164e-05	TMEM59	protein_coding
ENSG00000162390.17	236.739	-1.26378	0.296592	-4.26101	2.03506e-05	0.000171493	ACOT11	protein_coding
ENSG00000162391.12	61.7313	-3.2033	0.715	-4.48014	7.45951e-06	6.97296e-05	FAM151A	protein_coding
ENSG00000169174.10	3834.34	-4.22893	0.295579	-14.3073	1.97033e-46	5.7662e-44	PCSK9	protein_coding
ENSG00000284686.1	25.3986	-2.01084	0.731513	-2.74888	0.00597986	0.023149	AC119674.2	protein_coding
ENSG00000162407.9	1742.94	-1.47874	0.210023	-7.04086	1.91062e-12	5.2278e-11	PLPP3	protein_coding
ENSG00000162409.11	2200.71	-1.18098	0.236994	-4.98318	6.25479e-07	7.2997e-06	PRKAA2	protein_coding
ENSG00000187889.13	186.632	2.12948	0.327747	6.49733	8.1756e-11	1.8328e-09	FYB2	protein_coding
ENSG00000157131.10	165.066	-3.04288	0.355216	-8.56629	1.06876e-17	5.48095e-16	C8A	protein_coding
ENSG00000021852.13	52.414	-1.73809	0.507517	-3.42469	0.000615507	0.00342962	C8B	protein_coding
ENSG00000173406.15	18.3682	2.31175	0.772054	2.99429	0.00275088	0.0121617	DAB1	protein_coding
ENSG00000162601.10	3787.11	1.16704	0.274378	4.2534	2.10547e-05	0.000176928	MYSM1	protein_coding
ENSG00000162599.16	2190.19	-1.41269	0.21157	-6.6772	2.43557e-11	5.83411e-10	NFIA	protein_coding
ENSG00000132854.19	1230.84	-1.60448	0.267854	-5.99013	2.09667e-09	3.85593e-08	KANK4	protein_coding
ENSG00000162607.13	3910.47	-1.04474	0.259077	-4.03256	5.51737e-05	0.000417391	USP1	protein_coding
ENSG00000132855.4	13.5816	1.92202	0.974219	1.97288	0.048509	0.121021	ANGPTL3	protein_coding
ENSG00000079739.17	2823	-1.96787	0.233872	-8.41431	3.95226e-17	1.88005e-15	PGM1	protein_coding
ENSG00000185483.12	75.1835	1.29238	0.419348	3.08189	0.00205693	0.0095451	ROR1	protein_coding
ENSG00000158966.15	33.6656	1.94443	0.597427	3.25467	0.00113524	0.00579327	CACHD1	protein_coding
ENSG00000162437.14	787.866	-1.23428	0.253989	-4.85958	1.17638e-06	1.28751e-05	RAVER2	protein_coding
ENSG00000162433.15	5471.36	-1.48626	0.266404	-5.57897	2.41942e-08	3.7545e-07	AK4	protein_coding
ENSG00000118473.22	8.59427	6.29922	1.74551	3.60881	0.000307608	0.00188314	SGIP1	protein_coding
ENSG00000152763.17	44.1144	1.42717	0.531366	2.68586	0.00723437	0.0270751	WDR78	protein_coding
ENSG00000081985.11	12.1905	6.21795	1.66393	3.7369	0.000186305	0.00122045	IL12RB2	protein_coding
ENSG00000116717.13	1272.59	1.72341	0.219544	7.84998	4.16118e-15	1.58242e-13	GADD45A	protein_coding
ENSG00000172380.6	89.8233	3.617	0.449844	8.04056	8.94274e-16	3.65918e-14	GNG12	protein_coding
ENSG00000033122.19	15.5586	5.96003	1.6207	3.67745	0.000235579	0.00149663	LRRC7	protein_coding
ENSG00000197568.14	39.7606	1.35479	0.520818	2.60127	0.00928797	0.0331701	HHLA3	protein_coding
ENSG00000116761.11	421.386	-3.64853	0.314608	-11.5971	4.26445e-31	6.04295e-29	CTH	protein_coding
ENSG00000050628.20	7.43287	5.91322	1.80575	3.27467	0.00105786	0.00545106	PTGER3	protein_coding
ENSG00000178965.14	11.9469	3.5461	1.351	2.6248	0.00867002	0.0313794	ERICH3	protein_coding
ENSG00000137968.16	919.201	2.37091	0.270685	8.75892	1.97133e-18	1.07008e-16	SLC44A5	protein_coding
ENSG00000184005.11	4.52423	5.63253	1.98438	2.83843	0.00453366	0.018422	ST6GALNAC3	protein_coding
ENSG00000154027.19	5.67349	5.89628	1.88368	3.13019	0.00174695	0.0083425	AK5	protein_coding
ENSG00000162614.18	75.5519	1.49248	0.424412	3.51658	0.00043714	0.00255083	NEXN	protein_coding
ENSG00000203943.8	6.32045	3.52692	1.42698	2.47159	0.0134512	0.0445024	SAMD13	protein_coding
ENSG00000117151.13	240.042	1.15667	0.278905	4.14719	3.36586e-05	0.000270515	CTBS	protein_coding
ENSG00000117155.16	866.808	-1.74636	0.308548	-5.65993	1.51435e-08	2.42549e-07	SSX2IP	protein_coding
ENSG00000171517.6	2.74767	5.06074	2.28279	2.21691	0.026629	0.0766064	LPAR3	protein_coding
ENSG00000153898.13	3.2345	5.30117	2.1637	2.45005	0.0142835	0.0466485	MCOLN2	protein_coding
ENSG00000162643.13	70.4246	10.4348	1.51103	6.90579	4.99231e-12	1.29742e-10	WDR63	protein_coding
ENSG00000055732.13	66.7961	5.54301	0.849732	6.52325	6.87992e-11	1.5566e-09	MCOLN3	protein_coding
ENSG00000171502.15	47.2703	1.99908	0.526595	3.79623	0.000146912	0.000989857	COL24A1	protein_coding
ENSG00000122417.15	17.3515	2.05655	0.839641	2.44932	0.0143127	0.0467152	ODF2L	protein_coding
ENSG00000137975.8	21.5301	6.13262	1.22277	5.01534	5.29405e-07	6.25986e-06	CLCA2	protein_coding
ENSG00000016490.15	4.82365	3.88012	1.95576	1.98394	0.0472624	0.118717	CLCA1	protein_coding
ENSG00000143013.13	1511.29	-1.10816	0.204298	-5.42425	5.81973e-08	8.41803e-07	LMO4	protein_coding
ENSG00000183347.14	3.77726	4.83636	2.10259	2.30019	0.0214373	0.0643955	GBP6	protein_coding
ENSG00000171488.15	44.0257	1.39962	0.561436	2.49293	0.0126695	0.0425223	LRRC8C	protein_coding
ENSG00000162669.16	80.541	1.11488	0.500957	2.22549	0.0260481	0.0752649	HFM1	protein_coding
ENSG00000137948.18	6.50314	5.88727	1.8517	3.17939	0.00147583	0.0072404	BRDT	protein_coding
ENSG00000189195.13	89.8985	2.68423	0.391225	6.86109	6.83389e-12	1.74901e-10	BTBD8	protein_coding
ENSG00000162676.12	496.421	-2.17698	0.267129	-8.14953	3.65331e-16	1.55882e-14	GFI1	protein_coding
ENSG00000154511.12	407.6	-1.56606	0.289006	-5.41877	6.00117e-08	8.65892e-07	DIPK1A	protein_coding
ENSG00000122483.17	850.935	1.08796	0.23922	4.54796	5.4169e-06	5.18282e-05	CCDC18	protein_coding
ENSG00000137936.18	443.865	-1.2223	0.276844	-4.41513	1.00949e-05	9.13906e-05	BCAR3	protein_coding
ENSG00000162627.17	655.752	-1.27817	0.279399	-4.57473	4.76845e-06	4.61322e-05	SNX7	protein_coding
ENSG00000099260.11	352.168	-1.21803	0.33903	-3.59268	0.000327296	0.00199234	PALMD	protein_coding
ENSG00000156869.13	412.129	-1.69584	0.307323	-5.51811	3.42672e-08	5.20954e-07	FRRS1	protein_coding
ENSG00000156875.14	197.187	-1.19693	0.33894	-3.53139	0.000413382	0.0024317	MFSD14A	protein_coding
ENSG00000060718.22	12.0648	5.62659	1.66831	3.37263	0.000744535	0.00404885	COL11A1	protein_coding
ENSG00000162631.18	4.6231	5.36806	1.9672	2.72878	0.00635697	0.0244019	NTNG1	protein_coding
ENSG00000134215.16	585.448	-1.90226	0.311096	-6.11471	9.67299e-10	1.88312e-08	VAV3	protein_coding
ENSG00000085491.17	754.599	-1.65134	0.221945	-7.44029	1.00463e-13	3.25889e-12	SLC25A24	protein_coding
ENSG00000116266.11	1333.89	1.57048	0.258005	6.08703	1.15027e-09	2.22005e-08	STXBP3	protein_coding
ENSG00000085433.15	427.644	1.2066	0.319363	3.77815	0.000157995	0.00105529	WDR47	protein_coding
ENSG00000116299.17	24.9822	4.54545	0.886229	5.12898	2.91315e-07	3.65318e-06	KIAA1324	protein_coding
ENSG00000134222.16	682.75	-1.28104	0.304994	-4.20021	2.66665e-05	0.00021896	PSRC1	protein_coding
ENSG00000221986.7	47.4949	1.51146	0.550549	2.74537	0.00604418	0.0233477	MYBPHL	protein_coding
ENSG00000143028.9	60.0442	1.87796	0.479316	3.918	8.92852e-05	0.000637982	SYPL2	protein_coding
ENSG00000116337.16	2017.74	-1.24568	0.305275	-4.08053	4.49333e-05	0.000348117	AMPD2	protein_coding
ENSG00000168765.17	480.03	-1.86313	0.287884	-6.4718	9.68416e-11	2.14775e-09	GSTM4	protein_coding
ENSG00000134202.10	774.4	-1.13568	0.244803	-4.63914	3.49856e-06	3.49259e-05	GSTM3	protein_coding
ENSG00000198758.10	1297.39	-1.86211	0.29104	-6.39813	1.57288e-10	3.37705e-09	EPS8L3	protein_coding
ENSG00000184371.14	1376.31	2.03201	0.283433	7.16926	7.54039e-13	2.16899e-11	CSF1	protein_coding
ENSG00000116396.14	1348.46	1.4926	0.246914	6.04503	1.49385e-09	2.81655e-08	KCNC4	protein_coding
ENSG00000168679.18	33.9421	-1.23437	0.547285	-2.25544	0.0241056	0.0708151	SLC16A4	protein_coding
ENSG00000177301.15	4.31892	5.46199	2.08659	2.61766	0.00885349	0.0319361	KCNA2	protein_coding
ENSG00000143119.14	3.50101	4.83623	2.0773	2.32813	0.0199052	0.0607658	CD53	protein_coding
ENSG00000162777.17	4.72015	4.51961	2.00874	2.24997	0.0244506	0.0715786	DENND2D	protein_coding
ENSG00000173947.14	29.5562	2.31422	0.606369	3.81652	0.000135346	0.000921146	PIFO	protein_coding
ENSG00000197852.11	1050.2	2.14431	0.220412	9.72864	2.27612e-22	1.68822e-20	INKA2	protein_coding
ENSG00000143079.15	881.004	1.16039	0.224303	5.17332	2.29973e-07	2.9331e-06	CTTNBP2NL	protein_coding
ENSG00000007341.19	708.403	1.01257	0.258023	3.92435	8.69659e-05	0.000623229	ST7L	protein_coding
ENSG00000155366.16	2046.75	1.73442	0.288794	6.00573	1.90473e-09	3.51253e-08	RHOC	protein_coding
ENSG00000155367.15	19.4924	3.07675	0.869147	3.53996	0.000400186	0.00236337	PPM1J	protein_coding
ENSG00000134242.16	3.81327	5.47422	2.08369	2.62717	0.00860984	0.0312158	PTPN22	protein_coding
ENSG00000118655.6	600.455	-1.02255	0.24978	-4.09379	4.24382e-05	0.00033119	DCLRE1B	protein_coding
ENSG00000116774.12	159.81	-2.34622	0.422057	-5.55901	2.71314e-08	4.18138e-07	OLFML3	protein_coding
ENSG00000175984.15	41.5417	3.15968	0.710656	4.44614	8.74281e-06	8.03383e-05	DENND2C	protein_coding
ENSG00000116748.21	3.26357	4.81825	2.26212	2.12997	0.033174	0.0904119	AMPD1	protein_coding
ENSG00000198765.12	5.07398	5.34267	1.96701	2.71613	0.00660496	0.0251637	SYCP1	protein_coding
ENSG00000173218.15	1180.98	-1.42611	0.215012	-6.63271	3.29582e-11	7.77027e-10	VANGL1	protein_coding
ENSG00000118729.11	3.43584	5.22554	2.17795	2.3993	0.0164266	0.0521175	CASQ2	protein_coding
ENSG00000134247.10	1381.77	-1.48892	0.247589	-6.01368	1.81363e-09	3.36065e-08	PTGFRN	protein_coding
ENSG00000134258.17	5.39543	3.927	1.90668	2.0596	0.0394364	0.103569	VTCN1	protein_coding
ENSG00000183508.5	66.2107	3.74039	0.558008	6.70312	2.04015e-11	4.95476e-10	TENT5C	protein_coding
ENSG00000155761.13	14.6426	5.93534	1.64224	3.61418	0.000301302	0.00185085	SPAG17	protein_coding
ENSG00000092607.15	94.0443	2.7237	0.398155	6.84081	7.87452e-12	1.99916e-10	TBX15	protein_coding
ENSG00000092621.12	4322.04	-4.48549	0.267725	-16.7541	5.28974e-63	3.95614e-60	PHGDH	protein_coding
ENSG00000134240.11	8.33356	2.94244	1.44154	2.04118	0.0412326	0.107074	HMGCS2	protein_coding
ENSG00000188610.12	304.838	1.03961	0.282103	3.6852	0.000228522	0.00145661	FAM72B	protein_coding
ENSG00000143127.13	70.165	-2.60123	0.443873	-5.8603	4.62042e-09	8.0727e-08	ITGA10	protein_coding
ENSG00000271601.4	816.675	-1.31532	0.261114	-5.03736	4.71994e-07	5.65301e-06	LIX1L	protein_coding
ENSG00000121851.13	106.556	1.07992	0.360618	2.99463	0.00274778	0.01215	POLR3GL	protein_coding
ENSG00000265972.5	1979.85	4.13521	0.268054	15.4268	1.08102e-53	4.54772e-51	TXNIP	protein_coding
ENSG00000131781.13	1076.95	-1.31278	0.270894	-4.8461	1.25913e-06	1.37083e-05	FMO5	protein_coding
ENSG00000131778.19	257.993	-1.02268	0.313427	-3.2629	0.00110278	0.00564794	CHD1L	protein_coding
ENSG00000116128.11	724.448	-1.94815	0.241812	-8.05647	7.85284e-16	3.22794e-14	BCL9	protein_coding
ENSG00000265107.3	3.94079	5.76584	2.04167	2.82409	0.00474157	0.0191398	GJA5	protein_coding
ENSG00000203814.6	3736.18	-2.46896	0.304557	-8.10671	5.20071e-16	2.15753e-14	HIST2H2BF	protein_coding
ENSG00000183598.3	1163.48	-2.39462	0.348697	-6.86735	6.54067e-12	1.68196e-10	HIST2H3D	protein_coding
ENSG00000203811.1	417.752	-1.26762	0.374456	-3.38523	0.000711199	0.00388562	HIST2H3C	protein_coding
ENSG00000203812.2	1431.59	-1.6398	0.327181	-5.01191	5.38926e-07	6.36126e-06	HIST2H2AA3	protein_coding
ENSG00000270276.2	295.699	-1.23777	0.373858	-3.31079	0.00093033	0.0048951	HIST2H4B	protein_coding
ENSG00000184678.10	7343.18	-1.40296	0.298303	-4.70312	2.56218e-06	2.64004e-05	HIST2H2BE	protein_coding
ENSG00000184260.5	7796.16	-1.04703	0.333273	-3.14166	0.00167991	0.00807676	HIST2H2AC	protein_coding
ENSG00000184270.5	2323.07	-2.04923	0.352476	-5.81382	6.10615e-09	1.04589e-07	HIST2H2AB	protein_coding
ENSG00000023902.14	533.409	-2.11456	0.278283	-7.59859	2.99378e-14	1.01902e-12	PLEKHO1	protein_coding
ENSG00000143401.15	2993.74	-1.86663	0.229678	-8.12716	4.39468e-16	1.84303e-14	ANP32E	protein_coding
ENSG00000118298.12	61.0402	-2.81073	0.518945	-5.41624	6.08652e-08	8.76798e-07	CA14	protein_coding
ENSG00000143369.15	69.3154	2.19438	0.431564	5.08472	3.68167e-07	4.53248e-06	ECM1	protein_coding
ENSG00000143382.14	1259.92	1.39555	0.341607	4.08524	4.40308e-05	0.00034154	ADAMTSL4	protein_coding
ENSG00000143452.16	3.22332	4.17602	2.095	1.99333	0.0462252	0.116751	HORMAD1	protein_coding
ENSG00000197622.13	973.144	1.17018	0.242788	4.81976	1.43731e-06	1.54917e-05	CDC42SE1	protein_coding
ENSG00000143458.12	4.38799	3.99684	1.9833	2.01525	0.0438789	0.112215	GABPB2	protein_coding
ENSG00000143416.21	582.361	-1.28406	0.295706	-4.34233	1.40977e-05	0.000123476	SELENBP1	protein_coding
ENSG00000143375.15	215.774	1.24377	0.303521	4.09781	4.17079e-05	0.00032568	CGN	protein_coding
ENSG00000159409.14	65.839	8.91715	1.49907	5.94845	2.70702e-09	4.92125e-08	CELF3	protein_coding
ENSG00000178796.12	24.3236	8.95265	1.57595	5.6808	1.34062e-08	2.16397e-07	RIIAD1	protein_coding
ENSG00000182134.16	289.339	1.47465	0.279997	5.26667	1.38923e-07	1.86181e-06	TDRKH	protein_coding
ENSG00000143365.18	27.3574	-2.59921	0.701139	-3.70712	0.000209627	0.00135413	RORC	protein_coding
ENSG00000163191.6	924.967	1.21188	0.274406	4.41636	1.00376e-05	9.09306e-05	S100A11	protein_coding
ENSG00000159450.12	4.29798	5.84721	2.03691	2.87063	0.00409651	0.0169319	TCHH	protein_coding
ENSG00000197915.6	5.05917	4.40051	1.91702	2.29549	0.0217051	0.0650448	HRNR	protein_coding
ENSG00000143631.10	19.0045	6.6895	1.59279	4.19985	2.67086e-05	0.000219239	FLG	protein_coding
ENSG00000240386.3	168.549	11.7651	4.7849	2.45881	0.0139399	0.0457952	LCE1F	protein_coding
ENSG00000186226.9	68.2122	10.4579	1.50315	6.95732	3.46801e-12	9.16317e-11	LCE1E	protein_coding
ENSG00000172155.9	2.07584	5.4232	2.74052	1.9789	0.0478276	0.119676	LCE1D	protein_coding
ENSG00000197084.5	124.311	11.3221	1.48354	7.63179	2.31508e-14	8.03238e-13	LCE1C	protein_coding
ENSG00000196734.8	119.36	11.2678	1.48537	7.58585	3.30321e-14	1.11588e-12	LCE1B	protein_coding
ENSG00000163220.11	3.32557	4.5269	2.08437	2.17183	0.0298686	0.0835339	S100A9	protein_coding
ENSG00000197956.10	1073.93	1.13618	0.303611	3.74221	0.00018241	0.00119756	S100A6	protein_coding
ENSG00000196154.12	86.5262	-1.92988	0.417146	-4.62639	3.72098e-06	3.68457e-05	S100A4	protein_coding
ENSG00000169418.10	10.4988	3.92029	1.27023	3.08629	0.00202672	0.00943435	NPR1	protein_coding
ENSG00000169291.10	3.18946	5.17567	2.16555	2.39	0.0168483	0.0531672	SHE	protein_coding
ENSG00000163239.12	2.56897	5.44974	2.32891	2.34004	0.0192817	0.0592355	TDRD10	protein_coding
ENSG00000143603.19	5.40825	4.39572	1.85197	2.37354	0.0176187	0.0551252	KCNN3	protein_coding
ENSG00000163354.15	14.0789	3.67451	0.948132	3.87552	0.000106395	0.000744242	DCST2	protein_coding
ENSG00000143537.13	1410.84	-1.02796	0.296085	-3.47183	0.00051693	0.00294994	ADAM15	protein_coding
ENSG00000143590.14	36.3187	-1.81996	0.603578	-3.01528	0.00256741	0.0114934	EFNA3	protein_coding
ENSG00000169242.12	2095.16	-2.23254	0.287611	-7.76238	8.33513e-15	3.03264e-13	EFNA1	protein_coding
ENSG00000169231.13	68.0221	1.32919	0.464239	2.86316	0.00419433	0.017262	THBS3	protein_coding
ENSG00000160767.21	1002.66	-1.64412	0.287544	-5.7178	1.07913e-08	1.77054e-07	FAM189B	protein_coding
ENSG00000143630.10	260.586	-1.2757	0.345473	-3.69261	0.000221967	0.00142021	HCN3	protein_coding
ENSG00000143627.19	262	-2.67457	0.355499	-7.52342	5.33626e-14	1.7674e-12	PKLR	protein_coding
ENSG00000160752.14	4694.35	-2.00318	0.275126	-7.28094	3.31498e-13	1.0085e-11	FDPS	protein_coding
ENSG00000132718.9	191.439	4.03664	0.408999	9.86955	5.64198e-23	4.39031e-21	SYT11	protein_coding
ENSG00000254726.3	1572.63	-1.31828	0.299035	-4.40844	1.04118e-05	9.39434e-05	MEX3A	protein_coding
ENSG00000196189.13	29.7261	2.51335	0.656835	3.82646	0.000129998	0.000888566	SEMA4A	protein_coding
ENSG00000260238.6	3.32521	-4.979	2.23876	-2.224	0.0261482	0.0754731	PMF1-BGLAP	protein_coding
ENSG00000160783.19	717.249	-1.59648	0.282087	-5.65952	1.518e-08	2.42988e-07	PMF1	protein_coding
ENSG00000187862.11	15.5831	2.54732	0.828589	3.07429	0.00211007	0.00975808	TTC24	protein_coding
ENSG00000143320.9	43.1374	3.21546	0.652928	4.92467	8.45013e-07	9.56332e-06	CRABP2	protein_coding
ENSG00000027869.11	300.402	5.02552	0.383551	13.1026	3.18019e-39	7.01832e-37	SH2D2A	protein_coding
ENSG00000187800.13	215.628	3.69849	0.369246	10.0163	1.29216e-23	1.07377e-21	PEAR1	protein_coding
ENSG00000132694.18	2504.76	-1.16998	0.23859	-4.90373	9.40349e-07	1.05316e-05	ARHGEF11	protein_coding
ENSG00000143297.19	7.35366	6.00791	1.81796	3.30476	0.000950565	0.00498209	FCRL5	protein_coding
ENSG00000160856.21	2.74782	4.57102	2.2552	2.02688	0.0426745	0.10977	FCRL3	protein_coding
ENSG00000163554.13	5.05252	3.92702	1.90922	2.05687	0.0396987	0.104049	SPTA1	protein_coding
ENSG00000163564.14	13.7178	8.07338	1.67592	4.81729	1.45518e-06	1.56592e-05	PYHIN1	protein_coding
ENSG00000163565.18	3.29525	5.57371	2.1677	2.57125	0.0101332	0.0356216	IFI16	protein_coding
ENSG00000177807.9	995.379	-1.38488	0.224484	-6.16914	6.86627e-10	1.36132e-08	KCNJ10	protein_coding
ENSG00000162729.14	1137.28	-2.39263	0.275178	-8.69484	3.47307e-18	1.848e-16	IGSF8	protein_coding
ENSG00000018625.14	349.4	-4.72493	0.411687	-11.477	1.72113e-30	2.35227e-28	ATP1A2	protein_coding
ENSG00000132681.16	4.17087	4.04668	1.96356	2.06088	0.0393142	0.103359	ATP1A4	protein_coding
ENSG00000162738.6	88.0911	1.17318	0.427254	2.74586	0.00603523	0.0233232	VANGL2	protein_coding
ENSG00000158764.7	5.22327	6.69106	1.95422	3.42391	0.000617276	0.00343734	ITLN2	protein_coding
ENSG00000143217.9	1514.31	3.42381	0.253427	13.5101	1.36403e-41	3.40047e-39	NECTIN4	protein_coding
ENSG00000158850.15	1380.01	-1.06892	0.275592	-3.87864	0.000105041	0.000735536	B4GALT3	protein_coding
ENSG00000158874.11	59520.2	-2.02639	0.255001	-7.94661	1.91679e-15	7.57821e-14	APOA2	protein_coding
ENSG00000248485.2	4.25551	5.5888	1.96312	2.84689	0.00441481	0.0180125	PCP4L1	protein_coding
ENSG00000158887.16	616.315	-2.37645	0.262125	-9.06609	1.23367e-19	7.36483e-18	MPZ	protein_coding
ENSG00000072694.20	2.85709	5.1909	2.27001	2.28673	0.0222117	0.0663001	FCGR2B	protein_coding
ENSG00000132185.16	75.3913	10.6053	1.50187	7.0614	1.64831e-12	4.5424e-11	FCRLA	protein_coding
ENSG00000198574.6	2.69199	5.06074	2.34244	2.16046	0.0307374	0.0854403	SH2D1B	protein_coding
ENSG00000185630.18	14.21	3.08972	0.98344	3.14175	0.0016794	0.00807578	PBX1	protein_coding
ENSG00000143179.16	1970.01	-1.71104	0.22008	-7.77463	7.56691e-15	2.76434e-13	UCK2	protein_coding
ENSG00000143195.13	27.9822	4.64858	0.888523	5.23181	1.67856e-07	2.19921e-06	ILDR2	protein_coding
ENSG00000143194.13	8.94182	7.41312	1.74428	4.24997	2.13797e-05	0.000179268	MAEL	protein_coding
ENSG00000143167.12	4.0985	5.67977	2.06018	2.75693	0.00583474	0.0227245	GPA33	protein_coding
ENSG00000198821.10	7.79524	2.69484	1.22301	2.20345	0.0275629	0.0786125	CD247	protein_coding
ENSG00000198771.11	5.53774	5.98269	1.89518	3.1568	0.00159513	0.00774664	RCSD1	protein_coding
ENSG00000197965.12	2608.93	-1.48457	0.206718	-7.18163	6.88871e-13	1.99862e-11	MPZL1	protein_coding
ENSG00000143158.11	1260.36	-1.61751	0.219205	-7.37899	1.59493e-13	5.05198e-12	MPC2	protein_coding
ENSG00000117479.14	2578.74	-1.30756	0.227855	-5.73857	9.54778e-09	1.58096e-07	SLC19A2	protein_coding
ENSG00000198734.10	8655.31	1.22643	0.288877	4.24553	2.18077e-05	0.000182515	F5	protein_coding
ENSG00000174175.17	14.2089	6.00275	1.65804	3.6204	0.000294149	0.00181394	SELP	protein_coding
ENSG00000203740.3	4.03257	4.72706	2.01698	2.34363	0.0190972	0.0588079	METTL11B	protein_coding
ENSG00000197959.14	18.7372	2.74578	0.963282	2.85045	0.00436579	0.0178721	DNM3	protein_coding
ENSG00000180999.11	12.4131	2.99019	1.23162	2.42785	0.0151887	0.0490395	C1orf105	protein_coding
ENSG00000117586.11	474.236	3.45232	0.324131	10.651	1.72498e-26	1.79318e-24	TNFSF4	protein_coding
ENSG00000162753.13	2.89936	5.15644	2.32671	2.2162	0.026678	0.076694	SLC9C2	protein_coding
ENSG00000117601.13	636.359	-1.53033	0.260562	-5.8732	4.27462e-09	7.50749e-08	SERPINC1	protein_coding
ENSG00000116147.17	6.86765	4.3829	1.79069	2.44761	0.0143808	0.0468771	TNR	protein_coding
ENSG00000116183.11	17.8198	4.35087	1.10802	3.9267	8.61179e-05	0.000618469	PAPPA2	protein_coding
ENSG00000152092.16	8.50782	4.9174	1.7741	2.77177	0.00557525	0.0218721	ASTN1	protein_coding
ENSG00000188585.9	3.00088	5.63509	2.29258	2.45797	0.0139723	0.0458546	CLEC20A	protein_coding
ENSG00000116194.13	545.46	-2.25286	0.703927	-3.20042	0.00137228	0.00680679	ANGPTL1	protein_coding
ENSG00000162779.22	20.6653	1.91231	0.730763	2.61686	0.00887415	0.0319937	AXDND1	protein_coding
ENSG00000143337.18	1515.07	-1.08654	0.283271	-3.83568	0.000125218	0.000860479	TOR1AIP1	protein_coding
ENSG00000116260.17	344.983	-1.12814	0.33032	-3.41531	0.0006371	0.00353239	QSOX1	protein_coding
ENSG00000135823.14	1956.67	1.5672	0.215085	7.28641	3.18314e-13	9.72792e-12	STX6	protein_coding
ENSG00000153029.14	1550.52	6.08377	0.242903	25.0461	1.92551e-138	2.59212e-134	MR1	protein_coding
ENSG00000198216.12	17.016	7.42526	1.61979	4.58409	4.55977e-06	4.43043e-05	CACNA1E	protein_coding
ENSG00000121446.20	9.5481	6.44352	1.75644	3.66851	0.000243967	0.00154409	RGSL1	protein_coding
ENSG00000135824.12	4.25615	5.74299	2.09342	2.74335	0.00608151	0.0234818	RGS8	protein_coding
ENSG00000135838.13	14.8949	2.77684	0.924161	3.00471	0.00265833	0.0118205	NPL	protein_coding
ENSG00000157060.16	2.3763	5.20626	2.35709	2.20876	0.0271912	0.0778578	SHCBP1L	protein_coding
ENSG00000058085.14	12.5307	5.47249	1.64724	3.32221	0.000893068	0.00473419	LAMC2	protein_coding
ENSG00000157064.11	13.399	7.06473	1.65683	4.26401	2.00786e-05	0.000169625	NMNAT2	protein_coding
ENSG00000116701.14	36.7092	-1.28066	0.570496	-2.24482	0.0247798	0.0723614	NCF2	protein_coding
ENSG00000143344.15	1520.88	1.41592	0.213628	6.62797	3.40342e-11	8.01695e-10	RGL1	protein_coding
ENSG00000173627.8	2.83107	4.77998	2.29797	2.08009	0.0375174	0.0997353	APOBEC4	protein_coding
ENSG00000198756.12	1384.01	-1.62964	0.232215	-7.01779	2.25413e-12	6.10565e-11	COLGALT2	protein_coding
ENSG00000198860.12	1037.05	-1.78111	0.292942	-6.08009	1.20117e-09	2.30838e-08	TSEN15	protein_coding
ENSG00000135842.17	16.1387	3.17133	0.922833	3.43652	0.000589246	0.00330106	FAM129A	protein_coding
ENSG00000116668.13	255.831	1.0366	0.402446	2.57576	0.010002	0.0352342	SWT1	protein_coding
ENSG00000143341.12	36.9453	4.44672	0.841861	5.28201	1.27775e-07	1.7201e-06	HMCN1	protein_coding
ENSG00000116741.8	35.9034	1.58344	0.645023	2.45486	0.0140939	0.0461355	RGS2	protein_coding
ENSG00000162630.5	4.32403	5.44964	2.03614	2.67646	0.00744053	0.0277157	B3GALT2	protein_coding
ENSG00000162687.17	4.03507	5.58839	2.05895	2.71419	0.00664375	0.0252829	KCNT2	protein_coding
ENSG00000000971.15	4.4561	5.64357	2.01415	2.80196	0.00507933	0.0202571	CFH	protein_coding
ENSG00000116785.13	2.48475	5.47527	2.36886	2.31135	0.0208134	0.0629287	CFHR3	protein_coding
ENSG00000213047.13	406.638	-1.15448	0.300737	-3.83884	0.000123617	0.000851434	DENND1B	protein_coding
ENSG00000081237.20	7.38595	4.25834	1.80593	2.35798	0.0183747	0.0569298	PTPRC	protein_coding
ENSG00000116833.14	57.6577	-1.66749	0.54278	-3.07212	0.00212542	0.00981893	NR5A2	protein_coding
ENSG00000163362.11	1118.57	1.06821	0.272348	3.92223	8.77349e-05	0.000628071	INAVA	protein_coding
ENSG00000163395.16	14.9926	2.63521	0.853441	3.08775	0.00201678	0.00939605	IGFN1	protein_coding
ENSG00000174307.6	1067.54	1.10478	0.253214	4.36303	1.28275e-05	0.00011372	PHLDA3	protein_coding
ENSG00000159176.14	1664.61	-1.04057	0.258292	-4.02865	5.60982e-05	0.000423315	CSRP1	protein_coding
ENSG00000134369.15	21.2141	2.73625	0.805562	3.3967	0.000682029	0.00375597	NAV1	protein_coding
ENSG00000170075.9	5.9472	2.84818	1.43799	1.98067	0.0476279	0.119326	GPR37L1	protein_coding
ENSG00000143862.8	713.524	1.60338	0.318875	5.02825	4.94965e-07	5.90188e-06	ARL8A	protein_coding
ENSG00000143851.15	4.95331	6.13514	1.92928	3.18001	0.00147269	0.00723024	PTPN7	protein_coding
ENSG00000143858.12	5.55039	3.07815	1.55938	1.97396	0.0483861	0.120759	SYT2	protein_coding
ENSG00000117153.16	1305.48	1.17131	0.228741	5.1207	3.04406e-07	3.81024e-06	KLHL12	protein_coding
ENSG00000133063.16	3.7065	5.6443	2.12233	2.65948	0.00782609	0.0288683	CHIT1	protein_coding
ENSG00000159388.6	2151.2	3.34097	0.225751	14.7994	1.47903e-49	5.04068e-47	BTG2	protein_coding
ENSG00000143842.15	1142.51	-2.05294	0.287499	-7.14068	9.28701e-13	2.62651e-11	SOX13	protein_coding
ENSG00000143839.15	3.42315	5.1755	2.07237	2.49738	0.0125116	0.0421184	REN	protein_coding
ENSG00000174567.8	466.345	1.502	0.289605	5.18639	2.14413e-07	2.75422e-06	GOLT1A	protein_coding
ENSG00000133056.13	863.144	-1.04086	0.247854	-4.19947	2.67537e-05	0.000219542	PIK3C2B	protein_coding
ENSG00000163531.15	18.1299	6.43995	1.60025	4.02435	5.71329e-05	0.00043064	NFASC	protein_coding
ENSG00000184144.12	2.38711	4.71063	2.32269	2.02809	0.0425507	0.109484	CNTN2	protein_coding
ENSG00000133069.17	58.3266	1.39855	0.54692	2.55714	0.0105536	0.0367586	TMCC2	protein_coding
ENSG00000163545.8	464.225	1.71165	0.270113	6.33679	2.34608e-10	4.94644e-09	NUAK2	protein_coding
ENSG00000281406.2	259.65	1.20211	0.290605	4.1366	3.52494e-05	0.000281035	BLACAT1	protein_coding
ENSG00000174514.13	42.6134	3.65897	0.567721	6.44501	1.15591e-10	2.53433e-09	MFSD4A	protein_coding
ENSG00000276600.5	11.7783	3.13017	1.03672	3.0193	0.00253359	0.0113615	RAB7B	protein_coding
ENSG00000263528.8	432.725	-1.08294	0.312289	-3.46774	0.000524859	0.00299012	IKBKE	protein_coding
ENSG00000266094.7	74.256	3.30089	0.474091	6.96257	3.34113e-12	8.854e-11	RASSF5	protein_coding
ENSG00000196352.15	1240.78	1.19989	0.270454	4.4366	9.13926e-06	8.36104e-05	CD55	protein_coding
ENSG00000117322.17	7.47656	6.2011	1.80788	3.43004	0.000603493	0.00336756	CR2	protein_coding
ENSG00000203710.11	7.03601	6.24389	1.79703	3.47456	0.000511688	0.00292436	CR1	protein_coding
ENSG00000008118.10	27.4553	7.69679	1.56176	4.92829	8.29515e-07	9.40373e-06	CAMK1G	protein_coding
ENSG00000196878.15	19.9772	4.13679	0.859144	4.81501	1.47192e-06	1.58329e-05	LAMB3	protein_coding
ENSG00000162757.4	42.802	1.72318	0.517396	3.33049	0.000866939	0.00461385	C1orf74	protein_coding
ENSG00000143469.19	15.8019	7.25608	1.62393	4.46823	7.88703e-06	7.32496e-05	SYT14	protein_coding
ENSG00000054392.13	651.181	3.30215	0.231818	14.2446	4.84529e-46	1.38782e-43	HHAT	protein_coding
ENSG00000143473.13	6.48069	3.21739	1.50365	2.13972	0.0323773	0.0888791	KCNH1	protein_coding
ENSG00000170385.10	3912.93	1.6129	0.30737	5.24741	1.5425e-07	2.0408e-06	SLC30A1	protein_coding
ENSG00000143493.13	1392.78	-1.53273	0.262042	-5.84918	4.9399e-09	8.56971e-08	INTS7	protein_coding
ENSG00000143476.18	2008.53	-1.18313	0.240593	-4.91756	8.76283e-07	9.87156e-06	DTL	protein_coding
ENSG00000162769.13	1767.85	-1.26945	0.222781	-5.69818	1.21093e-08	1.96759e-07	FLVCR1	protein_coding
ENSG00000143494.15	125.548	-1.22931	0.365197	-3.36616	0.000762231	0.00413423	VASH2	protein_coding
ENSG00000143499.14	1854.4	-1.11264	0.239036	-4.65471	3.24436e-06	3.26546e-05	SMYD2	protein_coding
ENSG00000136636.13	2685.89	-1.5915	0.255909	-6.219	5.00343e-10	1.0106e-08	KCTD3	protein_coding
ENSG00000042781.13	21.131	4.13224	0.984057	4.19919	2.67875e-05	0.000219618	USH2A	protein_coding
ENSG00000196482.17	6.94553	5.8366	1.8313	3.18714	0.00143688	0.00707251	ESRRG	protein_coding
ENSG00000162814.11	11.7841	2.61322	0.964511	2.70937	0.00674115	0.0255488	SPATA17	protein_coding
ENSG00000196660.10	232.809	-1.88882	0.313696	-6.02117	1.73161e-09	3.2242e-08	SLC30A10	protein_coding
ENSG00000116141.15	9.05121	5.94653	1.77744	3.34556	0.000821175	0.00440776	MARK1	protein_coding
ENSG00000117791.16	188.505	1.37702	0.310216	4.4389	9.04199e-06	8.27768e-05	MARC2	protein_coding
ENSG00000186205.13	724.562	-2.06359	0.269107	-7.66831	1.74277e-14	6.11763e-13	MARC1	protein_coding
ENSG00000143502.15	2.67965	4.85575	2.29033	2.12011	0.033997	0.0921982	SUSD4	protein_coding
ENSG00000162909.18	362.95	2.31809	0.354751	6.53441	6.38587e-11	1.45459e-09	CAPN2	protein_coding
ENSG00000143815.15	5699.49	-1.16327	0.204784	-5.68046	1.34329e-08	2.16697e-07	LBR	protein_coding
ENSG00000143819.12	4240.16	1.11554	0.267038	4.17745	2.94798e-05	0.000240083	EPHX1	protein_coding
ENSG00000203685.10	13.7319	7.7776	1.65515	4.69902	2.61407e-06	2.68733e-05	STUM	protein_coding
ENSG00000143772.9	12.0097	7.66557	1.67428	4.57843	4.68481e-06	4.54046e-05	ITPKB	protein_coding
ENSG00000143816.8	62.0933	5.98862	0.69925	8.56435	1.08683e-17	5.55253e-16	WNT9A	protein_coding
ENSG00000198835.4	69.0344	-1.50816	0.405403	-3.72015	0.000199107	0.00129467	GJC2	protein_coding
ENSG00000154358.20	48.8906	1.41712	0.490411	2.88967	0.00385652	0.0161098	OBSCN	protein_coding
ENSG00000143632.14	73.4083	-2.11026	0.48045	-4.39226	1.12178e-05	0.000100777	ACTA1	protein_coding
ENSG00000135776.5	1221.29	-2.3055	0.214235	-10.7616	5.22694e-27	5.51883e-25	ABCB10	protein_coding
ENSG00000135763.10	1267.34	-1.58449	0.22408	-7.07112	1.53686e-12	4.24395e-11	URB2	protein_coding
ENSG00000135744.8	17817.9	-1.74433	0.269066	-6.48291	8.99719e-11	2.00033e-09	AGT	protein_coding
ENSG00000135773.13	48.8318	4.05809	0.569849	7.12135	1.06877e-12	2.99745e-11	CAPN9	protein_coding
ENSG00000182118.8	123.961	1.20491	0.376987	3.19614	0.00139278	0.00689197	FAM89A	protein_coding
ENSG00000119283.15	12.468	2.43504	0.952983	2.55517	0.0106134	0.0369051	TRIM67	protein_coding
ENSG00000116906.13	2805.05	-1.11183	0.239275	-4.64667	3.37338e-06	3.38268e-05	GNPAT	protein_coding
ENSG00000116991.10	52.8092	4.1078	0.577591	7.11195	1.14414e-12	3.20216e-11	SIPA1L2	protein_coding
ENSG00000135778.12	1818.23	2.05068	0.21309	9.62351	6.3621e-22	4.59231e-20	NTPCR	protein_coding
ENSG00000135749.19	26.7671	5.15065	0.970366	5.30794	1.1087e-07	1.51252e-06	PCNX2	protein_coding
ENSG00000168264.10	10812.8	-1.11876	0.198334	-5.64079	1.69268e-08	2.68555e-07	IRF2BP2	protein_coding
ENSG00000168243.11	994.502	-2.37525	0.25725	-9.23323	2.62591e-20	1.66745e-18	GNG4	protein_coding
ENSG00000116962.15	14631.5	-1.85644	0.211917	-8.76026	1.94796e-18	1.05953e-16	NID1	protein_coding
ENSG00000086619.13	322.587	1.1642	0.320538	3.63202	0.000281211	0.00174575	ERO1B	protein_coding
ENSG00000186197.14	48.4501	-1.5137	0.483957	-3.12775	0.00176151	0.00839713	EDARADD	protein_coding
ENSG00000198626.16	29.9571	4.69279	0.901926	5.20308	1.96017e-07	2.53607e-06	RYR2	protein_coding
ENSG00000182901.16	2.82794	5.0121	2.1789	2.30029	0.021432	0.0643919	RGS7	protein_coding
ENSG00000117009.12	3.00503	5.58787	2.2245	2.51197	0.012006	0.0408039	KMO	protein_coding
ENSG00000054277.14	174.502	-1.22314	0.322613	-3.79137	0.000149818	0.00100742	OPN3	protein_coding
ENSG00000203668.2	2355.3	-1.44882	0.255338	-5.67414	1.39388e-08	2.24321e-07	CHML	protein_coding
ENSG00000174371.17	945.886	-1.16712	0.253104	-4.61123	4.00288e-06	3.93047e-05	EXO1	protein_coding
ENSG00000180287.16	36.7663	8.06798	1.54808	5.21161	1.87207e-07	2.43378e-06	PLD5	protein_coding
ENSG00000054282.16	475.216	1.27961	0.241937	5.28901	1.22977e-07	1.65967e-06	SDCCAG8	protein_coding
ENSG00000117020.17	54.4781	1.46015	0.518858	2.81417	0.00489041	0.0196263	AKT3	protein_coding
ENSG00000179397.18	74.7676	1.20553	0.423626	2.84573	0.00443095	0.0180728	CATSPERE	protein_coding
ENSG00000162849.16	73.9309	3.26455	0.454185	7.18772	6.58818e-13	1.91349e-11	KIF26B	protein_coding
ENSG00000162714.12	1777.19	-1.6631	0.239359	-6.94814	3.70131e-12	9.72235e-11	ZNF496	protein_coding
ENSG00000184731.6	155.72	1.52142	0.34958	4.35213	1.34821e-05	0.000118702	FAM110C	protein_coding
ENSG00000172554.12	5.57014	5.77989	1.9261	3.00082	0.00269251	0.0119465	SNTG2	protein_coding
ENSG00000130508.11	269.958	8.66323	0.707269	12.2489	1.70386e-34	3.09964e-32	PXDN	protein_coding
ENSG00000186487.19	11.7634	6.89184	1.68353	4.09367	4.24594e-05	0.000331259	MYT1L	protein_coding
ENSG00000151360.10	39.7446	1.56959	0.516757	3.03738	0.00238646	0.0108188	ALLC	protein_coding
ENSG00000115738.10	8739.94	1.50083	0.194255	7.72606	1.10925e-14	3.98205e-13	ID2	protein_coding
ENSG00000143797.12	33.0733	2.94195	0.709025	4.14928	3.33519e-05	0.00026813	MBOAT2	protein_coding
ENSG00000172059.11	898.37	1.3855	0.22034	6.28801	3.21554e-10	6.69052e-09	KLF11	protein_coding
ENSG00000205795.4	8.77396	6.94563	1.75925	3.94807	7.87851e-05	0.000572217	CYS1	protein_coding
ENSG00000143882.12	29.4417	3.33723	0.70963	4.70277	2.56657e-06	2.64355e-05	ATP6V1C2	protein_coding
ENSG00000150873.11	36.691	4.24038	0.899268	4.71537	2.4127e-06	2.50037e-05	C2orf50	protein_coding
ENSG00000162976.13	90.2352	1.38433	0.389009	3.55861	0.000372821	0.00222027	PQLC3	protein_coding
ENSG00000196208.14	7423.65	-2.42622	0.235642	-10.2962	7.331e-25	6.82975e-23	GREB1	protein_coding
ENSG00000134324.11	900.111	-1.00486	0.225627	-4.45366	8.44192e-06	7.77859e-05	LPIN1	protein_coding
ENSG00000071575.11	59.0394	1.64359	0.594493	2.7647	0.00569759	0.0222612	TRIB2	protein_coding
ENSG00000162981.14	101.671	7.11456	0.740183	9.61189	7.12295e-22	5.11408e-20	FAM84A	protein_coding
ENSG00000134323.12	241.98	-2.21743	0.350227	-6.33139	2.42957e-10	5.11844e-09	MYCN	protein_coding
ENSG00000197872.11	31.1366	6.19568	1.03683	5.97561	2.29227e-09	4.19845e-08	FAM49A	protein_coding
ENSG00000214842.5	14.8249	2.4379	1.08265	2.2518	0.0243349	0.071348	RAD51AP2	protein_coding
ENSG00000132031.13	2188.88	1.22998	0.209094	5.88243	4.04275e-09	7.1422e-08	MATN3	protein_coding
ENSG00000115884.11	8186.27	1.22312	0.271658	4.50243	6.71813e-06	6.32223e-05	SDC1	protein_coding
ENSG00000218819.4	153.269	2.0078	0.373387	5.37727	7.56239e-08	1.06994e-06	TDRD15	protein_coding
ENSG00000119771.15	23.9716	2.75641	0.747124	3.68936	0.000224818	0.00143606	KLHL29	protein_coding
ENSG00000205639.10	48.1373	2.24838	0.503015	4.4698	7.82917e-06	7.27373e-05	MFSD2B	protein_coding
ENSG00000115129.14	8123.46	5.32052	0.248898	21.3763	2.22177e-101	6.64655e-98	TP53I3	protein_coding
ENSG00000176732.6	11.964	2.4107	0.933488	2.58246	0.00980973	0.0346929	PFN4	protein_coding
ENSG00000184924.5	890.082	-1.23666	0.283759	-4.35814	1.31175e-05	0.000115948	PTRHD1	protein_coding
ENSG00000138092.11	2569.1	-1.02931	0.22977	-4.47977	7.47238e-06	6.98079e-05	CENPO	protein_coding
ENSG00000138031.14	68.6945	2.09434	0.492663	4.25107	2.12752e-05	0.000178502	ADCY3	protein_coding
ENSG00000084710.14	240.661	2.29633	0.344936	6.65726	2.78972e-11	6.64106e-10	EFR3B	protein_coding
ENSG00000157833.13	278.034	2.55925	0.329157	7.77516	7.53546e-15	2.75659e-13	GAREM2	protein_coding
ENSG00000157856.12	10.3592	1.94843	0.988746	1.97061	0.0487685	0.121522	DRC1	protein_coding
ENSG00000115155.17	106.393	5.86668	0.537317	10.9185	9.40767e-28	1.051e-25	OTOF	protein_coding
ENSG00000171303.7	5.66734	4.60864	1.89575	2.43103	0.0150558	0.0486979	KCNK3	protein_coding
ENSG00000157851.17	50.7975	2.36071	0.509487	4.6335	3.59539e-06	3.57072e-05	DPYSL5	protein_coding
ENSG00000084764.11	116.309	2.85392	0.373675	7.63745	2.21563e-14	7.70718e-13	MAPRE3	protein_coding
ENSG00000143994.14	16.7414	3.23676	0.838203	3.86154	0.000112673	0.000783273	ABHD1	protein_coding
ENSG00000084774.14	3758.89	-1.1468	0.279875	-4.09752	4.17593e-05	0.000325986	CAD	protein_coding
ENSG00000163794.6	24.5855	1.47393	0.687025	2.14539	0.031922	0.0879432	UCN	protein_coding
ENSG00000115216.14	4430.65	-1.12698	0.23017	-4.89628	9.76675e-07	1.08976e-05	NRBP1	protein_coding
ENSG00000138002.15	622.598	-2.22721	0.252041	-8.83669	9.85951e-19	5.46209e-17	IFT172	protein_coding
ENSG00000084734.9	397.007	-2.513	0.28816	-8.72084	2.76141e-18	1.4781e-16	GCKR	protein_coding
ENSG00000221843.4	72.9037	2.22158	0.527723	4.20975	2.55657e-05	0.000210757	C2orf16	protein_coding
ENSG00000243147.8	1792.77	1.09365	0.268828	4.0682	4.73768e-05	0.000364658	MRPL33	protein_coding
ENSG00000171174.15	155.045	3.2916	0.34538	9.53039	1.56691e-21	1.09012e-19	RBKS	protein_coding
ENSG00000075426.12	1569.5	1.58632	0.264065	6.00731	1.88625e-09	3.48561e-08	FOSL2	protein_coding
ENSG00000163803.13	160.102	3.0232	0.355902	8.49449	1.98801e-17	9.76737e-16	PLB1	protein_coding
ENSG00000189350.12	9.98558	3.68796	1.38185	2.66886	0.007611	0.0282179	TOGARAM2	protein_coding
ENSG00000179270.7	3.24744	5.51182	2.21905	2.48386	0.0129965	0.0433551	PCARE	protein_coding
ENSG00000115295.20	28.3015	1.98711	0.753802	2.63612	0.00838593	0.0305773	CLIP4	protein_coding
ENSG00000171094.18	11.225	4.4043	1.34269	3.28021	0.00103729	0.00535944	ALK	protein_coding
ENSG00000119801.13	1473.25	2.18577	0.243037	8.99356	2.3935e-19	1.40092e-17	YPEL5	protein_coding
ENSG00000213626.13	41.4704	4.60383	0.810519	5.68009	1.3462e-08	2.17037e-07	LBH	protein_coding
ENSG00000162949.16	3.94118	4.65057	2.07588	2.24029	0.0250721	0.073096	CAPN13	protein_coding
ENSG00000013016.16	79.3383	1.0949	0.447012	2.44938	0.0143102	0.0467152	EHD3	protein_coding
ENSG00000158125.10	13.771	4.67858	1.28878	3.63023	0.000283174	0.00175713	XDH	protein_coding
ENSG00000091106.19	8.80281	6.35179	1.75729	3.61454	0.000300881	0.00184868	NLRC4	protein_coding
ENSG00000018699.13	1504.46	-1.01364	0.228363	-4.43872	9.04968e-06	8.2819e-05	TTC27	protein_coding
ENSG00000049323.16	56.7911	2.26518	0.485179	4.66875	3.03045e-06	3.06736e-05	LTBP1	protein_coding
ENSG00000152689.18	12.5264	3.33555	1.15645	2.88431	0.00392279	0.0163443	RASGRP3	protein_coding
ENSG00000218739.10	1751.46	1.61451	0.275597	5.85824	4.67807e-09	8.16282e-08	CEBPZOS	protein_coding
ENSG00000115828.17	57.6728	3.6533	0.548457	6.66106	2.71856e-11	6.47738e-10	QPCT	protein_coding
ENSG00000163171.7	51.6553	5.43349	0.760514	7.1445	9.03209e-13	2.5571e-11	CDC42EP3	protein_coding
ENSG00000115841.20	417.885	1.52295	0.30529	4.98855	6.08327e-07	7.10877e-06	RMDN2	protein_coding
ENSG00000143891.17	1862.49	-1.23829	0.23862	-5.18937	2.1101e-07	2.7196e-06	GALM	protein_coding
ENSG00000214694.11	18.2731	3.95476	0.988161	4.00214	6.27716e-05	0.000467773	ARHGEF33	protein_coding
ENSG00000152154.11	42.2063	1.37107	0.608946	2.25154	0.0243512	0.0713807	TMEM178A	protein_coding
ENSG00000183023.18	23.3156	4.98529	1.0761	4.63276	3.60826e-06	3.58219e-05	SLC8A1	protein_coding
ENSG00000205086.7	3.70163	5.1389	2.16854	2.36976	0.0177998	0.0555578	C2orf91	protein_coding
ENSG00000162878.13	2107.57	-1.83897	0.276382	-6.65373	2.85765e-11	6.79676e-10	PKDCC	protein_coding
ENSG00000143924.19	28329.1	-1.61927	0.263997	-6.13368	8.58713e-10	1.68268e-08	EML4	protein_coding
ENSG00000162882.15	783.695	1.05284	0.316733	3.32405	0.000887197	0.00470678	HAAO	protein_coding
ENSG00000095002.14	3041.65	-1.20783	0.232652	-5.1916	2.08498e-07	2.68979e-06	MSH2	protein_coding
ENSG00000116062.15	4492.13	-1.97201	0.258441	-7.63039	2.34053e-14	8.11021e-13	MSH6	protein_coding
ENSG00000179915.23	24.9701	6.76654	1.58016	4.28219	1.85063e-05	0.000158028	NRXN1	protein_coding
ENSG00000178021.11	11.0026	6.8552	1.70147	4.02898	5.60189e-05	0.000422835	TSPYL6	protein_coding
ENSG00000177994.16	2.95019	4.81828	2.24428	2.14692	0.0318	0.0876968	C2orf73	protein_coding
ENSG00000119866.21	8.25027	3.85008	1.48781	2.58776	0.00966025	0.0342727	BCL11A	protein_coding
ENSG00000162927.14	1469.72	-1.00989	0.26541	-3.805	0.000141803	0.000960239	PUS10	protein_coding
ENSG00000237651.6	47.812	1.33968	0.499728	2.68082	0.00734413	0.0274135	C2orf74	protein_coding
ENSG00000115507.10	1143.92	-1.13533	0.290954	-3.90209	9.53657e-05	0.000676225	OTX1	protein_coding
ENSG00000179833.4	5396.34	1.5747	0.200955	7.83604	4.64969e-15	1.75319e-13	SERTAD2	protein_coding
ENSG00000115902.11	3641.82	-1.0006	0.205109	-4.8784	1.06948e-06	1.18327e-05	SLC1A4	protein_coding
ENSG00000138069.18	5345.71	1.06552	0.319433	3.33566	0.000850965	0.0045414	RAB1A	protein_coding
ENSG00000119865.8	7.82833	5.08828	1.81864	2.79785	0.00514442	0.0204712	CNRIP1	protein_coding
ENSG00000115956.10	10.2493	5.5695	1.71764	3.24253	0.00118474	0.00600264	PLEK	protein_coding
ENSG00000169621.10	243.332	2.10739	0.314869	6.69291	2.18774e-11	5.27802e-10	APLF	protein_coding
ENSG00000163219.11	7.23162	6.16086	1.78421	3.45299	0.000554406	0.00313129	ARHGAP25	protein_coding
ENSG00000163217.2	3.27668	5.16078	2.12608	2.42737	0.0152088	0.0490986	BMP10	protein_coding
ENSG00000183607.10	2.78924	4.54929	2.32107	1.96	0.0499958	0.123995	GKN2	protein_coding
ENSG00000169599.12	796.434	1.11028	0.228065	4.86826	1.12582e-06	1.23822e-05	NFU1	protein_coding
ENSG00000075340.23	15.44	5.59669	1.62493	3.44427	0.000572596	0.0032158	ADD2	protein_coding
ENSG00000116031.9	10.9796	4.40189	1.69474	2.59739	0.00939362	0.033463	CD207	protein_coding
ENSG00000116035.4	76.9434	-1.12365	0.510215	-2.20231	0.0276433	0.078767	VAX2	protein_coding
ENSG00000124370.11	1219.5	-1.10604	0.229499	-4.81938	1.44006e-06	1.55151e-05	MCEE	protein_coding
ENSG00000124374.9	50.0165	2.24134	0.591358	3.79015	0.000150559	0.00101088	PAIP2B	protein_coding
ENSG00000135636.14	53.0542	1.51373	0.476305	3.17807	0.00148258	0.00726689	DYSF	protein_coding
ENSG00000135632.12	2052.32	-1.46896	0.255817	-5.7422	9.34527e-09	1.55124e-07	SMYD5	protein_coding
ENSG00000144035.3	208.784	3.27841	0.345729	9.4826	2.48016e-21	1.70782e-19	NAT8	protein_coding
ENSG00000187833.7	6.17928	5.84609	1.87164	3.12351	0.00178707	0.00849941	C2orf78	protein_coding
ENSG00000187605.15	3043.86	-1.15008	0.225285	-5.10499	3.3082e-07	4.1084e-06	TET3	protein_coding
ENSG00000005448.16	120.046	1.1221	0.342912	3.27225	0.00106693	0.00548837	WDR54	protein_coding
ENSG00000114993.16	4371.77	-1.30285	0.262566	-4.96201	6.97675e-07	8.03087e-06	RTKN	protein_coding
ENSG00000239779.7	159.446	1.14688	0.359673	3.18868	0.00142923	0.00703868	WBP1	protein_coding
ENSG00000115275.12	3353.55	-1.03363	0.278604	-3.71003	0.000207237	0.0013419	MOGS	protein_coding
ENSG00000115297.11	21.6072	-1.82375	0.769796	-2.36914	0.0178297	0.0556446	TLX2	protein_coding
ENSG00000144045.14	1077.95	1.48358	0.24988	5.93717	2.8998e-09	5.25753e-08	DQX1	protein_coding
ENSG00000159374.17	6.23092	3.7583	1.52182	2.46962	0.0135258	0.0446889	M1AP	protein_coding
ENSG00000159399.9	11489.4	-2.08685	0.218803	-9.5376	1.4618e-21	1.02227e-19	HK2	protein_coding
ENSG00000115350.11	1111.57	-1.00171	0.218197	-4.59084	4.41463e-06	4.29561e-05	POLE4	protein_coding
ENSG00000115353.11	16.0628	6.97657	1.63048	4.27885	1.87865e-05	0.000159917	TACR1	protein_coding
ENSG00000176204.13	172.172	-1.41996	0.36777	-3.861	0.000112924	0.000784609	LRRTM4	protein_coding
ENSG00000066032.18	11.6088	3.05162	1.09064	2.79802	0.00514172	0.0204635	CTNNA2	protein_coding
ENSG00000115423.18	31.3778	4.41266	0.810178	5.44654	5.13599e-08	7.55224e-07	DNAH6	protein_coding
ENSG00000042445.14	4832.83	2.69038	0.253942	10.5945	3.16183e-26	3.26165e-24	RETSAT	protein_coding
ENSG00000152292.17	9.92383	3.87663	1.17969	3.28614	0.0010157	0.00527417	SH2D6	protein_coding
ENSG00000118640.11	1115.82	1.83853	0.235264	7.81477	5.50636e-15	2.0477e-13	VAMP8	protein_coding
ENSG00000168899.5	222.054	1.85969	0.363513	5.11587	3.12297e-07	3.89813e-06	VAMP5	protein_coding
ENSG00000068615.18	14.3252	1.78915	0.908561	1.96921	0.0489285	0.121864	REEP1	protein_coding
ENSG00000115561.16	1568.24	1.25978	0.270911	4.65016	3.3168e-06	3.33339e-05	CHMP3	protein_coding
ENSG00000172116.22	21.6548	-1.45088	0.65905	-2.20147	0.0277028	0.0788362	CD8B	protein_coding
ENSG00000187627.15	28.0134	-1.66307	0.63852	-2.60458	0.00919876	0.0329083	RGPD1	protein_coding
ENSG00000125551.18	3.05526	-4.69222	2.18199	-2.15043	0.0315209	0.0870875	PLGLB2	protein_coding
ENSG00000172086.8	128.168	1.76787	0.354435	4.98784	6.10566e-07	7.13184e-06	KRCC1	protein_coding
ENSG00000115593.15	7.73536	5.99169	1.78469	3.35727	0.000787167	0.00424894	SMYD1	protein_coding
ENSG00000163586.9	3539.68	-4.37692	0.262344	-16.6839	1.71537e-62	1.15462e-59	FABP1	protein_coding
ENSG00000214336.4	2.88286	5.1758	2.25029	2.30006	0.0214449	0.0644113	FOXI3	protein_coding
ENSG00000172073.4	178.746	7.07001	0.554807	12.7432	3.40161e-37	6.78408e-35	TEX37	protein_coding
ENSG00000153574.9	1318.58	-1.09539	0.224576	-4.8776	1.07384e-06	1.18736e-05	RPIA	protein_coding
ENSG00000155066.16	8.23537	7.32647	1.7729	4.13248	3.58865e-05	0.000285522	PROM2	protein_coding
ENSG00000174501.14	1308.79	-1.17204	0.248899	-4.70888	2.49078e-06	2.57434e-05	ANKRD36C	protein_coding
ENSG00000198885.9	689.354	-2.29046	0.295328	-7.75566	8.78879e-15	3.19338e-13	ITPRIPL1	protein_coding
ENSG00000249715.12	20.2732	1.87635	0.797384	2.35313	0.0186161	0.0575718	FER1L5	protein_coding
ENSG00000168754.15	3.91707	5.98092	2.21307	2.70254	0.00688124	0.0259883	FAM178B	protein_coding
ENSG00000135976.19	2256.57	-1.08009	0.25027	-4.31571	1.59092e-05	0.000137818	ANKRD36	protein_coding
ENSG00000196912.12	742.366	-1.23124	0.255408	-4.82067	1.43079e-06	1.54338e-05	ANKRD36B	protein_coding
ENSG00000115085.13	298.913	4.60681	0.313885	14.6767	9.08415e-49	3.01953e-46	ZAP70	protein_coding
ENSG00000168658.18	10.4404	4.70909	1.34327	3.50568	0.000455438	0.00264562	VWA3B	protein_coding
ENSG00000144191.11	4.94707	5.95344	1.96884	3.02383	0.00249597	0.0112227	CNGA3	protein_coding
ENSG00000071073.13	5306.93	-1.01792	0.242848	-4.1916	2.76994e-05	0.000226542	MGAT4A	protein_coding
ENSG00000144218.18	44.7844	9.21806	1.52489	6.04505	1.49364e-09	2.81655e-08	AFF3	protein_coding
ENSG00000170500.12	15.6959	3.35552	1.00096	3.35231	0.000801417	0.00431288	LONRF2	protein_coding
ENSG00000115526.11	495.308	-1.57804	0.260015	-6.06904	1.28677e-09	2.45361e-08	CHST10	protein_coding
ENSG00000163162.8	3517.44	-1.02483	0.214162	-4.78533	1.70709e-06	1.81094e-05	RNF149	protein_coding
ENSG00000175874.10	15.7348	2.08014	0.847092	2.45562	0.0140641	0.0460628	CREG2	protein_coding
ENSG00000196460.14	7.43825	4.00699	1.44883	2.76567	0.00568054	0.0222107	RFX8	protein_coding
ENSG00000115594.12	2933.09	-1.76936	0.230298	-7.68295	1.55468e-14	5.486e-13	IL1R1	protein_coding
ENSG00000115598.10	4.03507	5.30832	1.99752	2.65746	0.00787328	0.0290105	IL1RL2	protein_coding
ENSG00000115602.16	6.95244	3.02262	1.41733	2.13261	0.032957	0.0901093	IL1RL1	protein_coding
ENSG00000180251.4	4.21879	4.04482	1.98016	2.04268	0.0410845	0.106762	SLC9A4	protein_coding
ENSG00000115616.2	10.4211	3.17724	1.20724	2.63181	0.0084931	0.0308761	SLC9A2	protein_coding
ENSG00000071051.14	1113.06	-1.34167	0.275755	-4.86544	1.14205e-06	1.25429e-05	NCK2	protein_coding
ENSG00000153165.18	45.6718	1.31924	0.641529	2.0564	0.0397438	0.104121	RGPD3	protein_coding
ENSG00000144057.15	8.3372	4.38588	1.76445	2.48569	0.0129302	0.0432086	ST6GAL2	protein_coding
ENSG00000115665.8	3.50676	4.89142	2.20683	2.21649	0.0266582	0.0766687	SLC5A7	protein_coding
ENSG00000198075.10	242.716	2.86027	0.345157	8.28686	1.16277e-16	5.26159e-15	SULT1C4	protein_coding
ENSG00000135968.20	5321.68	1.71167	0.298987	5.72491	1.03488e-08	1.70313e-07	GCC2	protein_coding
ENSG00000169756.16	3125.09	-1.04754	0.21066	-4.97265	6.60447e-07	7.65141e-06	LIMS1	protein_coding
ENSG00000163006.12	1110.67	-1.18591	0.236053	-5.02392	5.06266e-07	6.01001e-06	CCDC138	protein_coding
ENSG00000135960.10	9.68975	5.86212	1.71479	3.41856	0.000629543	0.00349841	EDAR	protein_coding
ENSG00000172985.10	110.287	1.50673	0.717911	2.09877	0.0358372	0.0961133	SH3RF3	protein_coding
ENSG00000153093.18	12.7926	7.10372	1.67571	4.23923	2.24288e-05	0.000187247	ACOXL	protein_coding
ENSG00000153214.11	1763.38	1.2245	0.216269	5.66196	1.49653e-08	2.39979e-07	TMEM87B	protein_coding
ENSG00000188177.14	178.761	2.26822	0.317141	7.15209	8.54643e-13	2.43496e-11	ZC3H6	protein_coding
ENSG00000144130.11	131.343	3.89681	0.378723	10.2893	7.87146e-25	7.30797e-23	NT5DC4	protein_coding
ENSG00000136695.14	2.6507	4.89995	2.33443	2.09899	0.0358176	0.0960704	IL36RN	protein_coding
ENSG00000136689.18	1089.5	1.9024	0.225804	8.425	3.60742e-17	1.71905e-15	IL1RN	protein_coding
ENSG00000144134.18	469.588	1.42396	0.242469	5.87276	4.28604e-09	7.52265e-08	RABL2A	protein_coding
ENSG00000019169.10	4.85313	4.64678	1.93908	2.39638	0.016558	0.0524324	MARCO	protein_coding
ENSG00000155368.16	5207.3	-1.50547	0.233276	-6.45358	1.09239e-10	2.40683e-09	DBI	protein_coding
ENSG00000171227.7	864.363	-1.14356	0.272742	-4.19282	2.7551e-05	0.000225466	TMEM37	protein_coding
ENSG00000163075.13	19.3741	5.67593	1.24111	4.57328	4.80145e-06	4.6418e-05	CFAP221	protein_coding
ENSG00000144120.13	865.153	-1.11173	0.261617	-4.24946	2.14287e-05	0.000179567	TMEM177	protein_coding
ENSG00000163083.6	225.066	-1.05671	0.31986	-3.30366	0.000954304	0.0049978	INHBB	protein_coding
ENSG00000074047.21	3.89938	4.27938	2.03734	2.10048	0.0356867	0.0958077	GLI2	protein_coding
ENSG00000115112.8	21.7148	7.70304	1.58332	4.86514	1.14378e-06	1.2549e-05	TFCP2L1	protein_coding
ENSG00000155052.14	5.2952	5.43771	1.91574	2.83844	0.00453343	0.018422	CNTNAP5	protein_coding
ENSG00000169994.18	47.9583	8.12468	1.51833	5.35108	8.74315e-08	1.22223e-06	MYO7B	protein_coding
ENSG00000196604.12	1220.39	1.54931	0.233238	6.64259	3.08222e-11	7.31797e-10	POTEF	protein_coding
ENSG00000152076.18	32.7892	2.80799	0.62519	4.49142	7.07502e-06	6.63259e-05	CCDC74B	protein_coding
ENSG00000136718.9	2377.62	-1.55705	0.24957	-6.2389	4.40646e-10	8.96747e-09	IMP4	protein_coding
ENSG00000072135.13	796.693	-1.48822	0.258155	-5.76482	8.17465e-09	1.37216e-07	PTPN18	protein_coding
ENSG00000196834.12	17.3329	3.04707	0.859048	3.54704	0.000389592	0.00230993	POTEI	protein_coding
ENSG00000136002.18	63.1556	4.80074	0.615179	7.80381	6.00678e-15	2.22119e-13	ARHGEF4	protein_coding
ENSG00000188219.14	224.541	1.67499	0.275842	6.0723	1.26094e-09	2.41119e-08	POTEE	protein_coding
ENSG00000233087.7	6.00041	2.93986	1.38084	2.12904	0.0332508	0.090566	RAB6D	protein_coding
ENSG00000163040.14	44.5693	3.59726	0.587883	6.119	9.41646e-10	1.83584e-08	CCDC74A	protein_coding
ENSG00000183840.7	65.3796	1.3916	0.426179	3.26529	0.00109352	0.00560693	GPR39	protein_coding
ENSG00000176771.17	17.9803	4.43225	1.10304	4.01822	5.86389e-05	0.000441004	NCKAP5	protein_coding
ENSG00000152127.9	7240.41	-1.35346	0.197938	-6.83777	8.04355e-12	2.03538e-10	MGAT5	protein_coding
ENSG00000152128.13	7.36708	3.83927	1.45591	2.63703	0.00836366	0.0305126	TMEM163	protein_coding
ENSG00000176601.12	8.11378	4.99924	1.75615	2.84671	0.00441742	0.0180204	MAP3K19	protein_coding
ENSG00000115850.10	10.3233	2.65098	1.02502	2.58627	0.00970202	0.0343933	LCT	protein_coding
ENSG00000076003.5	1475.34	-2.77639	0.220146	-12.6116	1.82331e-36	3.50648e-34	MCM6	protein_coding
ENSG00000144229.12	17.4326	7.31072	1.61888	4.51591	6.30449e-06	5.96004e-05	THSD7B	protein_coding
ENSG00000144227.5	4.25892	5.13148	2.0515	2.50133	0.0123728	0.0417555	NXPH2	protein_coding
ENSG00000168702.17	29.7477	2.34284	0.69412	3.37527	0.000737439	0.00401675	LRP1B	protein_coding
ENSG00000075884.14	6.45757	4.43726	1.82221	2.4351	0.0148876	0.0482118	ARHGAP15	protein_coding
ENSG00000168280.17	107.58	2.9845	0.443095	6.73557	1.63284e-11	4.01118e-10	KIF5C	protein_coding
ENSG00000150556.17	4.63344	4.32491	1.95746	2.20945	0.0271433	0.0777702	LYPD6B	protein_coding
ENSG00000115963.13	39.0755	3.13553	0.605595	5.1776	2.24753e-07	2.8788e-06	RND3	protein_coding
ENSG00000184898.7	41.2051	2.50613	0.617367	4.05939	4.92011e-05	0.000376868	RBM43	protein_coding
ENSG00000183091.19	223.278	5.06798	0.450017	11.2618	2.02671e-29	2.58612e-27	NEB	protein_coding
ENSG00000177917.10	1195.4	-1.36213	0.221506	-6.14942	7.77689e-10	1.53508e-08	ARL6IP6	protein_coding
ENSG00000162989.5	5.21498	5.70046	1.93847	2.9407	0.00327471	0.0140418	KCNJ3	protein_coding
ENSG00000153234.14	9.67306	4.16638	1.71504	2.42932	0.0151271	0.0488869	NR4A2	protein_coding
ENSG00000115159.16	6.84974	3.8083	1.48241	2.56898	0.0101997	0.0357854	GPD2	protein_coding
ENSG00000136541.14	4.14124	5.2547	1.98366	2.649	0.00807307	0.0296332	ERMN	protein_coding
ENSG00000115165.10	2.90062	4.48157	2.25242	1.98967	0.0466275	0.117525	CYTIP	protein_coding
ENSG00000007001.12	8.10522	5.87275	1.83364	3.20278	0.00136109	0.00676498	UPP2	protein_coding
ENSG00000144283.21	5995.99	-1.14938	0.190928	-6.01997	1.74454e-09	3.24603e-08	PKP4	protein_coding
ENSG00000196151.10	526.382	1.03757	0.258409	4.01524	5.93851e-05	0.000446117	WDSUB1	protein_coding
ENSG00000054219.11	4.44063	5.74569	1.95167	2.94399	0.00324012	0.0139201	LY75	protein_coding
ENSG00000153246.13	16.7072	4.92074	1.24953	3.93807	8.214e-05	0.000593383	PLA2R1	protein_coding
ENSG00000115221.12	6.82194	3.41553	1.54375	2.21249	0.0269328	0.0772576	ITGB6	protein_coding
ENSG00000136535.15	3.81741	4.81831	2.02019	2.38508	0.0170753	0.0537199	TBR1	protein_coding
ENSG00000144290.17	13.9461	7.19045	1.64977	4.35847	1.30977e-05	0.000115886	SLC4A10	protein_coding
ENSG00000184611.11	6.71294	6.11645	1.88015	3.25317	0.00114127	0.00581411	KCNH7	protein_coding
ENSG00000182263.14	1370.6	-2.26527	0.247011	-9.17072	4.69867e-20	2.91491e-18	FIGN	protein_coding
ENSG00000115290.9	217	-1.63248	0.321854	-5.07212	3.934e-07	4.81013e-06	GRB14	protein_coding
ENSG00000169507.9	898.858	-2.38683	0.309087	-7.7222	1.14338e-14	4.08282e-13	SLC38A11	protein_coding
ENSG00000153253.17	19.8673	7.50956	1.61961	4.63665	3.54109e-06	3.52851e-05	SCN3A	protein_coding
ENSG00000178662.16	12.0041	4.95097	1.69217	2.9258	0.00343568	0.0146295	CSRNP3	protein_coding
ENSG00000136546.15	29.6107	6.39811	1.5518	4.12301	3.73955e-05	0.000295693	SCN7A	protein_coding
ENSG00000163092.19	21.9001	2.04383	0.786531	2.59854	0.00936216	0.0333819	XIRP2	protein_coding
ENSG00000172318.5	38.0717	1.99218	0.674401	2.954	0.00313686	0.0135565	B3GALT1	protein_coding
ENSG00000152254.10	4.78322	5.35543	1.94985	2.74658	0.00602197	0.0232819	G6PC2	protein_coding
ENSG00000073734.9	29.6104	6.02579	1.16895	5.15489	2.53781e-07	3.21544e-06	ABCB11	protein_coding
ENSG00000073737.16	3.06045	5.09283	2.24297	2.27057	0.023173	0.068569	DHRS9	protein_coding
ENSG00000081479.14	92.5494	4.12692	0.516001	7.9979	1.2656e-15	5.09344e-14	LRP2	protein_coding
ENSG00000163093.12	145.167	-1.52639	0.34102	-4.47596	7.6068e-06	7.0916e-05	BBS5	protein_coding
ENSG00000071909.18	34.9267	8.60902	1.54351	5.57758	2.43892e-08	3.78257e-07	MYO3B	protein_coding
ENSG00000204335.3	4291.58	-1.15775	0.240259	-4.81877	1.44449e-06	1.55566e-05	SP5	protein_coding
ENSG00000128683.14	123.183	5.47904	0.483807	11.3248	9.8854e-30	1.28577e-27	GAD1	protein_coding
ENSG00000123600.19	2708.38	1.28473	0.239249	5.36985	7.88024e-08	1.11141e-06	METTL8	protein_coding
ENSG00000115844.11	125.343	1.54953	0.405747	3.81897	0.000134011	0.000913213	DLX2	protein_coding
ENSG00000152256.13	2459.14	-1.41417	0.252638	-5.59761	2.17325e-08	3.39006e-07	PDK1	protein_coding
ENSG00000091436.17	1139.86	-1.39202	0.24688	-5.63843	1.7161e-08	2.7179e-07	MAP3K20	protein_coding
ENSG00000144306.14	260.383	1.0587	0.307839	3.43913	0.000583589	0.00327208	SCRN3	protein_coding
ENSG00000163328.13	32.8385	2.48831	0.645606	3.85422	0.000116101	0.000804608	GPR155	protein_coding
ENSG00000115935.17	17.5124	3.87924	1.08728	3.56784	0.000359941	0.00215485	WIPF1	protein_coding
ENSG00000138435.15	6.06217	5.99965	1.87635	3.19751	0.00138618	0.00686436	CHRNA1	protein_coding
ENSG00000174279.4	3.31753	5.31022	2.2049	2.40837	0.016024	0.0511113	EVX2	protein_coding
ENSG00000128710.5	3.48072	4.52685	2.15967	2.09609	0.0360745	0.0966027	HOXD10	protein_coding
ENSG00000278500.1	19.0834	-1.86186	0.771829	-2.41227	0.0158536	0.0506878	AC009336.2	protein_coding
ENSG00000196659.9	182.498	1.78774	0.324667	5.50639	3.66262e-08	5.53692e-07	TTC30B	protein_coding
ENSG00000197557.7	215.019	1.88153	0.330115	5.69962	1.20075e-08	1.95223e-07	TTC30A	protein_coding
ENSG00000079156.17	19.5677	3.63653	0.92904	3.91429	9.06705e-05	0.000646507	OSBPL6	protein_coding
ENSG00000079150.18	138.488	-1.41522	0.335198	-4.22203	2.42111e-05	0.000200634	FKBP7	protein_coding
ENSG00000155657.26	714.67	6.53553	0.420408	15.5457	1.70215e-54	7.39172e-52	TTN	protein_coding
ENSG00000163492.15	35.208	4.48409	0.890696	5.03437	4.7942e-07	5.72667e-06	CCDC141	protein_coding
ENSG00000144331.20	27.9532	1.43431	0.621408	2.30816	0.02099	0.0633489	ZNF385B	protein_coding
ENSG00000115232.14	9.65313	6.85647	1.74054	3.93928	8.17272e-05	0.000590717	ITGA4	protein_coding
ENSG00000188452.14	4.91348	5.53806	1.94522	2.84701	0.00441316	0.0180085	CERKL	protein_coding
ENSG00000077232.18	6319.15	-1.15982	0.236129	-4.91183	9.02317e-07	1.01352e-05	DNAJC10	protein_coding
ENSG00000188738.15	36.4504	4.66081	0.805297	5.78769	7.13592e-09	1.20532e-07	FSIP2	protein_coding
ENSG00000144369.13	42.1177	2.64695	0.613085	4.31744	1.57853e-05	0.000136921	FAM171B	protein_coding
ENSG00000163012.3	2.62577	5.04429	2.31919	2.17502	0.0296285	0.0830349	ZSWIM2	protein_coding
ENSG00000064989.13	8.5082	4.68114	1.78934	2.61612	0.00889347	0.0320331	CALCRL	protein_coding
ENSG00000204262.13	114.861	2.96397	0.371912	7.96955	1.59247e-15	6.33318e-14	COL5A2	protein_coding
ENSG00000138449.10	2791.25	3.1435	0.250638	12.542	4.39795e-36	8.28046e-34	SLC40A1	protein_coding
ENSG00000187699.10	117.316	1.1818	0.369361	3.1996	0.0013762	0.00682371	C2orf88	protein_coding
ENSG00000138379.4	3.80989	5.26828	2.34718	2.24451	0.0247996	0.0723954	MSTN	protein_coding
ENSG00000151689.13	1245.65	1.92913	0.226812	8.50545	1.80894e-17	8.95291e-16	INPP1	protein_coding
ENSG00000151690.15	86.1251	1.15117	0.401852	2.86466	0.0041746	0.017194	MFSD6	protein_coding
ENSG00000138386.17	1740.02	-1.18471	0.22207	-5.33483	9.56355e-08	1.32453e-06	NAB1	protein_coding
ENSG00000115415.18	7776.36	1.85457	0.201309	9.21253	3.18515e-20	2.00366e-18	STAT1	protein_coding
ENSG00000138378.19	31.1655	3.45081	0.738796	4.67086	2.99938e-06	3.04278e-05	STAT4	protein_coding
ENSG00000128641.19	6458.73	-1.03072	0.23529	-4.38065	1.18325e-05	0.00010584	MYO1B	protein_coding
ENSG00000173559.12	3124.57	1.96289	0.249975	7.85233	4.08367e-15	1.55514e-13	NABP1	protein_coding
ENSG00000196950.14	1798.22	1.54537	0.26394	5.85501	4.76976e-09	8.30129e-08	SLC39A10	protein_coding
ENSG00000118997.14	30.1045	4.42102	0.859711	5.14245	2.71174e-07	3.41491e-06	DNAH7	protein_coding
ENSG00000138411.13	36.6353	3.18116	0.657965	4.83485	1.33246e-06	1.44465e-05	HECW2	protein_coding
ENSG00000119041.11	2761.54	1.03442	0.300635	3.44077	0.000580069	0.0032537	GTF3C3	protein_coding
ENSG00000187944.2	3.99049	5.56525	2.11122	2.63604	0.00838806	0.0305809	C2orf66	protein_coding
ENSG00000197121.15	2494.92	2.32555	0.251265	9.25537	2.1349e-20	1.38173e-18	PGAP1	protein_coding
ENSG00000065413.20	36.8306	2.06185	0.625762	3.29494	0.00098444	0.00513266	ANKRD44	protein_coding
ENSG00000162944.10	6.69665	4.49532	1.85454	2.42396	0.0153525	0.0494557	RFTN2	protein_coding
ENSG00000152430.17	4.77866	5.25463	2.00808	2.61674	0.00887748	0.0320012	BOLL	protein_coding
ENSG00000115896.16	12.5406	3.85136	1.19725	3.21685	0.00129607	0.00648615	PLCL1	protein_coding
ENSG00000226124.7	23.523	1.63896	0.680692	2.40779	0.0160494	0.0511509	FTCDNL1	protein_coding
ENSG00000155729.13	203.296	1.00693	0.302677	3.32673	0.000878719	0.00466524	KCTD18	protein_coding
ENSG00000138356.14	951.184	1.82639	0.22281	8.19707	2.4632e-16	1.07661e-14	AOX1	protein_coding
ENSG00000003400.14	1598.67	1.12963	0.230211	4.90692	9.25177e-07	1.03746e-05	CASP10	protein_coding
ENSG00000155749.12	21.5643	1.68815	0.831511	2.03022	0.0423345	0.109136	ALS2CR12	protein_coding
ENSG00000155754.15	16.347	6.07954	1.61577	3.76263	0.000168137	0.00111309	C2CD6	protein_coding
ENSG00000082126.18	11.1767	4.57552	1.32048	3.46504	0.000530162	0.0030165	MPP4	protein_coding
ENSG00000138395.15	13.75	7.06472	1.65281	4.27437	1.9168e-05	0.000162801	CDK15	protein_coding
ENSG00000155760.2	110.243	-2.02887	0.377756	-5.37085	7.83668e-08	1.10584e-06	FZD7	protein_coding
ENSG00000182329.13	7.67621	6.26133	1.78444	3.50885	0.000450042	0.00261875	KIAA2012	protein_coding
ENSG00000138380.18	152.406	2.07826	0.371367	5.59625	2.19036e-08	3.41477e-07	CARF	protein_coding
ENSG00000173166.18	1773.76	-1.04073	0.210918	-4.9343	8.0439e-07	9.15747e-06	RAPH1	protein_coding
ENSG00000178562.18	6.4878	5.62103	1.84748	3.04254	0.00234587	0.0106726	CD28	protein_coding
ENSG00000163599.16	6.76821	4.20014	1.81748	2.31097	0.0208343	0.062971	CTLA4	protein_coding
ENSG00000118257.16	3301.98	1.84565	0.219812	8.39652	4.59917e-17	2.17624e-15	NRP2	protein_coding
ENSG00000183671.12	3.37599	5.20524	2.16907	2.39976	0.0164059	0.0520642	GPR1	protein_coding
ENSG00000204186.9	373.658	1.85796	0.311904	5.95685	2.5715e-09	4.68437e-08	ZDBF2	protein_coding
ENSG00000114948.13	103.208	7.02857	0.751929	9.34738	8.98415e-21	5.97257e-19	ADAM23	protein_coding
ENSG00000232125.3	2.69532	4.73111	2.34604	2.01664	0.0437336	0.111928	DYTN	protein_coding
ENSG00000118263.15	261.079	-2.10466	0.275731	-7.633	2.29346e-14	7.96762e-13	KLF7	protein_coding
ENSG00000178385.15	1266.49	1.62358	0.205758	7.89074	3.00408e-15	1.16544e-13	PLEKHM3	protein_coding
ENSG00000138413.13	11062.7	-1.70671	0.22383	-7.62502	2.4399e-14	8.41124e-13	IDH1	protein_coding
ENSG00000078018.19	15.5406	3.52039	0.99026	3.55502	0.000377956	0.00224687	MAP2	protein_coding
ENSG00000144406.18	28.7801	8.39083	1.5525	5.40471	6.49134e-08	9.27176e-07	UNC80	protein_coding
ENSG00000115361.8	3.99033	5.7888	2.03089	2.85038	0.00436674	0.0178732	ACADL	protein_coding
ENSG00000178568.15	26.8383	6.03501	1.1801	5.114	3.15414e-07	3.93157e-06	ERBB4	protein_coding
ENSG00000174453.9	5.07012	5.58865	1.99452	2.80201	0.00507854	0.020257	VWC2L	protein_coding
ENSG00000138376.11	1074.32	-1.24251	0.261702	-4.74782	2.05624e-06	2.14499e-05	BARD1	protein_coding
ENSG00000144452.15	2567.85	10.6494	0.807654	13.1855	1.0628e-39	2.38457e-37	ABCA12	protein_coding
ENSG00000115425.14	1342.43	-1.23688	0.224568	-5.50782	3.63304e-08	5.49837e-07	PECR	protein_coding
ENSG00000144583.5	5.49366	5.17523	1.95702	2.64444	0.00818264	0.0299741	MARCH4	protein_coding
ENSG00000115457.10	55.9667	2.3612	0.457878	5.15683	2.51162e-07	3.18375e-06	IGFBP2	protein_coding
ENSG00000188282.12	3.09451	5.2251	2.24277	2.32975	0.0198194	0.0605557	RUFY4	protein_coding
ENSG00000180871.8	55.5817	10.1031	1.51387	6.67369	2.49448e-11	5.9593e-10	CXCR2	protein_coding
ENSG00000127838.14	1694.44	-1.02356	0.290159	-3.52759	0.000419365	0.00246098	PNKD	protein_coding
ENSG00000135926.15	6980.06	1.37341	0.230143	5.96762	2.40736e-09	4.39727e-08	TMBIM1	protein_coding
ENSG00000158428.4	117.343	6.44793	0.586908	10.9863	4.44923e-28	5.05448e-26	CATIP	protein_coding
ENSG00000018280.17	42.8854	2.37359	0.603443	3.93341	8.375e-05	0.000603556	SLC11A1	protein_coding
ENSG00000144579.7	3601.77	-1.61748	0.264816	-6.10795	1.00921e-09	1.96046e-08	CTDSP1	protein_coding
ENSG00000127831.10	6661.83	-2.08051	0.22361	-9.30419	1.3502e-20	8.86654e-19	VIL1	protein_coding
ENSG00000144580.13	4398.07	-1.07027	0.211277	-5.06571	4.0689e-07	4.95931e-06	CNOT9	protein_coding
ENSG00000115556.14	7.18115	5.89302	1.81875	3.24015	0.00119466	0.00604948	PLCD4	protein_coding
ENSG00000074582.14	906.54	-1.13103	0.270126	-4.18703	2.82626e-05	0.000230856	BCS1L	protein_coding
ENSG00000135912.11	4144.43	-1.11701	0.230896	-4.83773	1.31331e-06	1.42521e-05	TTLL4	protein_coding
ENSG00000115592.11	4.08107	5.62564	2.05745	2.73428	0.00625163	0.0240524	PRKAG3	protein_coding
ENSG00000135925.9	6.6773	6.78737	1.96925	3.44668	0.000567522	0.00319531	WNT10A	protein_coding
ENSG00000163501.7	27.6626	-3.86492	0.948155	-4.07626	4.57668e-05	0.000353478	IHH	protein_coding
ENSG00000163521.16	189.577	1.19781	0.294847	4.06249	4.85518e-05	0.00037253	GLB1L	protein_coding
ENSG00000127824.14	602.822	-1.00442	0.289033	-3.47509	0.00051069	0.0029199	TUBA4A	protein_coding
ENSG00000243910.7	66.3555	7.36504	0.947075	7.77661	7.44909e-15	2.7287e-13	TUBA4B	protein_coding
ENSG00000123992.19	1608.15	-1.91707	0.267184	-7.17509	7.22609e-13	2.08303e-11	DNPEP	protein_coding
ENSG00000175084.11	10.5148	5.13492	1.4579	3.52212	0.00042811	0.00250466	DES	protein_coding
ENSG00000072195.15	44.2952	4.27459	0.593555	7.20167	5.94782e-13	1.73311e-11	SPEG	protein_coding
ENSG00000072182.12	8.3599	3.45247	1.24841	2.7655	0.00568356	0.0222161	ASIC4	protein_coding
ENSG00000188760.10	461.838	-1.96716	0.298976	-6.57966	4.71514e-11	1.0897e-09	TMEM198	protein_coding
ENSG00000123999.5	47.9374	-3.64998	0.558798	-6.53183	6.49703e-11	1.47492e-09	INHA	protein_coding
ENSG00000144589.22	527.042	-1.02227	0.309029	-3.30801	0.000939609	0.00493524	STK11IP	protein_coding
ENSG00000135903.19	17.142	4.29533	1.00742	4.26368	2.01085e-05	0.000169718	PAX3	protein_coding
ENSG00000163082.10	8.67134	6.20846	1.77389	3.49991	0.000465413	0.00269537	SGPP2	protein_coding
ENSG00000124003.12	42.4933	-1.26806	0.560917	-2.26069	0.0237785	0.0700374	MOGAT1	protein_coding
ENSG00000152049.6	13.1255	7.76909	1.66997	4.65224	3.28342e-06	3.30231e-05	KCNE4	protein_coding
ENSG00000171951.5	9.6062	5.44929	1.73925	3.13313	0.00172953	0.00827688	SCG2	protein_coding
ENSG00000152056.17	298.055	1.2553	0.265056	4.73597	2.18006e-06	2.26801e-05	AP1S3	protein_coding
ENSG00000135919.13	3250.02	3.2896	0.220845	14.8955	3.52605e-50	1.28291e-47	SERPINE2	protein_coding
ENSG00000124019.10	6.06791	5.90516	1.87506	3.14933	0.00163648	0.00791196	FAM124B	protein_coding
ENSG00000135905.19	36.7306	6.75297	1.13986	5.92439	3.13465e-09	5.63399e-08	DOCK10	protein_coding
ENSG00000144468.17	443.194	1.18106	0.266761	4.42739	9.53796e-06	8.68448e-05	RHBDD1	protein_coding
ENSG00000081052.12	22.4787	5.23475	1.20377	4.34864	1.36985e-05	0.000120371	COL4A4	protein_coding
ENSG00000169031.19	36.627	7.31349	1.52459	4.79702	1.61047e-06	1.7125e-05	COL4A3	protein_coding
ENSG00000135917.15	1635.04	-2.65262	0.253003	-10.4845	1.01782e-25	1.00749e-23	SLC19A3	protein_coding
ENSG00000123977.10	9.67426	5.77392	1.7799	3.24397	0.00117878	0.0059758	DAW1	protein_coding
ENSG00000153820.13	10.6772	6.53799	1.69748	3.85159	0.000117355	0.000812256	SPHKAP	protein_coding
ENSG00000187957.8	9.21845	6.85795	1.73743	3.94718	7.90759e-05	0.000573865	DNER	protein_coding
ENSG00000163053.11	2.84047	5.35511	2.27587	2.35299	0.0186231	0.0575868	SLC16A14	protein_coding
ENSG00000079263.19	32.6237	2.39193	0.70502	3.39271	0.000692046	0.00380103	SP140	protein_coding
ENSG00000173699.16	2.14829	4.8565	2.43386	1.99539	0.0460004	0.116314	SPATA3	protein_coding
ENSG00000204128.6	2285.07	-1.96486	0.22792	-8.62082	6.6474e-18	3.4685e-16	C2orf72	protein_coding
ENSG00000135914.6	7.67676	4.03085	1.82162	2.21278	0.0269125	0.0772157	HTR2B	protein_coding
ENSG00000156966.7	66.3315	2.79966	0.503353	5.56203	2.66661e-08	4.11673e-07	B3GNT7	protein_coding
ENSG00000156973.14	330.519	1.10685	0.262429	4.21772	2.46784e-05	0.000204004	PDE6D	protein_coding
ENSG00000163273.4	22.1908	6.91815	1.56887	4.40965	1.03538e-05	9.34828e-05	NPPC	protein_coding
ENSG00000237412.6	10.9044	4.19688	1.29808	3.23316	0.00122429	0.00618554	PRSS56	protein_coding
ENSG00000115474.6	6.51341	5.58225	1.90905	2.92409	0.00345465	0.014701	KCNJ13	protein_coding
ENSG00000066248.15	358.291	-2.35966	0.286322	-8.24127	1.70395e-16	7.5456e-15	NGEF	protein_coding
ENSG00000130561.17	4.79019	3.38229	1.64152	2.06045	0.0393552	0.103412	SAG	protein_coding
ENSG00000167165.19	17.6257	-2.0055	0.795929	-2.51969	0.0117458	0.0400866	UGT1A6	protein_coding
ENSG00000241635.7	38.9491	-1.50602	0.586918	-2.56598	0.0102886	0.0360361	UGT1A1	protein_coding
ENSG00000185038.14	5.66833	3.78108	1.5897	2.37849	0.0173837	0.0545675	MROH2A	protein_coding
ENSG00000144481.17	11.3421	4.27485	1.22283	3.49585	0.000472549	0.00273199	TRPM8	protein_coding
ENSG00000168505.7	9.73142	5.67934	1.7138	3.31389	0.000920069	0.00485248	GBX2	protein_coding
ENSG00000132321.17	5.89371	6.08496	1.90113	3.2007	0.00137093	0.00680135	IQCA1	protein_coding
ENSG00000144476.6	2.18694	4.85663	2.46016	1.97411	0.0483687	0.120727	ACKR3	protein_coding
ENSG00000163359.15	27.3589	1.87667	0.642753	2.91974	0.00350326	0.0148796	COL6A3	protein_coding
ENSG00000177483.11	48.2181	-1.29789	0.518543	-2.50296	0.0123159	0.0416	RBM44	protein_coding
ENSG00000132330.17	567.957	-1.37581	0.261294	-5.26539	1.3989e-07	1.87383e-06	SCLY	protein_coding
ENSG00000144488.15	241.711	5.02409	0.346728	14.49	1.40154e-47	4.19278e-45	ESPNL	protein_coding
ENSG00000168427.9	125.705	6.68148	0.593636	11.2552	2.18386e-29	2.76048e-27	KLHL30	protein_coding
ENSG00000068024.16	2141.7	-1.12479	0.261231	-4.30574	1.66431e-05	0.000143667	HDAC4	protein_coding
ENSG00000182083.7	7.81578	7.33374	1.84152	3.98244	6.82124e-05	0.000503	OR6B2	protein_coding
ENSG00000178602.8	14.2751	8.12607	1.653	4.91595	8.83514e-07	9.94055e-06	OTOS	protein_coding
ENSG00000063660.9	2653.82	2.69164	0.30298	8.8839	6.45566e-19	3.62109e-17	GPC1	protein_coding
ENSG00000142327.13	1403.41	-1.45104	0.299913	-4.8382	1.31022e-06	1.42244e-05	RNPEPL1	protein_coding
ENSG00000178623.12	1072.94	1.11249	0.31762	3.50257	0.000460793	0.00267091	GPR35	protein_coding
ENSG00000130294.16	8.62124	4.75023	1.74802	2.7175	0.00657771	0.0250776	KIF1A	protein_coding
ENSG00000172482.5	274.921	-2.72371	0.310059	-8.78447	1.57102e-18	8.57972e-17	AGXT	protein_coding
ENSG00000172478.18	20.6041	-2.03989	0.859557	-2.37319	0.0176353	0.055134	MAB21L4	protein_coding
ENSG00000226321.5	3.3452	4.45663	2.11894	2.10323	0.0354453	0.0954137	CROCC2	protein_coding
ENSG00000162804.14	58.0531	2.79945	0.485079	5.77111	7.87501e-09	1.32517e-07	SNED1	protein_coding
ENSG00000115687.13	1370.2	-1.76784	0.285567	-6.19063	5.99257e-10	1.19514e-08	PASK	protein_coding
ENSG00000146205.13	647.78	-1.32884	0.3061	-4.34119	1.41713e-05	0.000124	ANO7	protein_coding
ENSG00000176720.6	1280.14	-1.07534	0.276747	-3.88563	0.000102064	0.000717297	BOK	protein_coding
ENSG00000168395.15	2630.72	-1.67579	0.244503	-6.85385	7.18865e-12	1.83283e-10	ING5	protein_coding
ENSG00000204099.11	1146.66	-2.04006	0.313581	-6.50567	7.73486e-11	1.73979e-09	NEU4	protein_coding
ENSG00000134121.10	6.40318	4.69756	1.82412	2.57525	0.0100167	0.0352768	CHL1	protein_coding
ENSG00000150995.19	3075.72	-1.55851	0.197836	-7.87779	3.33231e-15	1.28354e-13	ITPR1	protein_coding
ENSG00000196277.16	3.58793	5.42052	2.16598	2.50257	0.0123295	0.0416362	GRM7	protein_coding
ENSG00000196220.16	283.377	5.4596	0.365133	14.9524	1.50321e-50	5.54415e-48	SRGAP3	protein_coding
ENSG00000144550.13	6.19717	2.86187	1.37422	2.08255	0.0372923	0.0992447	CPNE9	protein_coding
ENSG00000114026.21	830.677	-1.19384	0.266092	-4.48656	7.23807e-06	6.77836e-05	OGG1	protein_coding
ENSG00000214021.16	1289.73	1.57302	0.234906	6.6964	2.1361e-11	5.16733e-10	TTLL3	protein_coding
ENSG00000187288.10	24.7308	-2.978	0.730658	-4.07578	4.58611e-05	0.000354105	CIDEC	protein_coding
ENSG00000163701.19	322.847	-1.11743	0.341399	-3.2731	0.00106374	0.00547404	IL17RE	protein_coding
ENSG00000163702.20	354.011	-1.00354	0.302001	-3.32297	0.00089066	0.00472236	IL17RC	protein_coding
ENSG00000134070.5	870.533	-1.42583	0.267141	-5.33735	9.43165e-08	1.30828e-06	IRAK2	protein_coding
ENSG00000157014.11	732.733	-1.47824	0.250618	-5.89838	3.67083e-09	6.53228e-08	TATDN2	protein_coding
ENSG00000157020.18	5636.33	-1.33055	0.251218	-5.29638	1.1812e-07	1.59973e-06	SEC13	protein_coding
ENSG00000157087.19	346.82	4.56206	0.302408	15.0858	2.00959e-51	7.72945e-49	ATP2B2	protein_coding
ENSG00000157103.12	10.9449	6.2018	1.67768	3.69665	0.000218463	0.00140146	SLC6A1	protein_coding
ENSG00000157152.17	7.27247	6.29885	1.8034	3.49276	0.000478052	0.0027573	SYN2	protein_coding
ENSG00000157150.5	17.2044	2.93483	0.848458	3.45902	0.000542148	0.00307107	TIMP4	protein_coding
ENSG00000132170.21	686.57	-1.91142	0.265829	-7.19039	6.46088e-13	1.87854e-11	PPARG	protein_coding
ENSG00000154743.17	463.274	-1.01823	0.245048	-4.15524	3.24946e-05	0.000262255	TSEN2	protein_coding
ENSG00000088726.16	253.284	8.89491	0.775684	11.4672	1.9283e-30	2.6221e-28	TMEM40	protein_coding
ENSG00000144712.12	6.06004	4.90072	1.87275	2.61686	0.00887421	0.0319937	CAND2	protein_coding
ENSG00000163520.14	36.6745	5.17928	0.742726	6.97334	3.09508e-12	8.24252e-11	FBLN2	protein_coding
ENSG00000154767.14	2133.56	1.68129	0.223069	7.53707	4.80663e-14	1.60763e-12	XPC	protein_coding
ENSG00000144596.13	376.246	7.46019	0.452748	16.4776	5.31743e-61	3.32945e-58	GRIP2	protein_coding
ENSG00000131379.9	21.0501	1.58955	0.768911	2.06728	0.0387082	0.102127	C3orf20	protein_coding
ENSG00000154783.11	9.7911	4.57136	1.70704	2.67795	0.00740752	0.0276118	FGD5	protein_coding
ENSG00000131370.16	11.019	2.60197	1.00515	2.58863	0.0096358	0.0341991	SH3BP5	protein_coding
ENSG00000206561.13	34.0711	1.17954	0.598939	1.96939	0.0489087	0.121826	COLQ	protein_coding
ENSG00000169814.13	633.637	-1.26667	0.232032	-5.45901	4.7881e-08	7.09385e-07	BTD	protein_coding
ENSG00000131378.14	24.6173	2.23546	0.696893	3.20775	0.00133779	0.0066726	RFTN1	protein_coding
ENSG00000092345.13	4.6802	5.66932	1.96775	2.88112	0.00396264	0.0164722	DAZL	protein_coding
ENSG00000154822.18	119.259	8.78696	1.07634	8.16373	3.24832e-16	1.39933e-14	PLCL2	protein_coding
ENSG00000183960.9	9.39757	3.25192	1.25236	2.59664	0.00941403	0.0335313	KCNH8	protein_coding
ENSG00000114166.8	241.087	2.51851	0.312037	8.07119	6.96177e-16	2.87482e-14	KAT2B	protein_coding
ENSG00000151789.12	11.4713	5.22017	1.31047	3.98342	6.79298e-05	0.00050163	ZNF385D	protein_coding
ENSG00000182247.10	54.9116	1.00216	0.451819	2.21806	0.026551	0.0763982	UBE2E2	protein_coding
ENSG00000163508.12	49.6523	4.24252	0.75514	5.6182	1.92957e-08	3.02574e-07	EOMES	protein_coding
ENSG00000283563.1	2.79282	4.93582	2.28154	2.16337	0.0305126	0.0849178	AC098650.1	protein_coding
ENSG00000144642.21	36.2538	4.39852	0.826998	5.31866	1.04532e-07	1.43647e-06	RBMS3	protein_coding
ENSG00000144644.14	15.1538	4.54709	1.31356	3.46165	0.000536884	0.0030451	GADL1	protein_coding
ENSG00000144645.13	2587.31	-1.71888	0.207344	-8.28997	1.13281e-16	5.15199e-15	OSBPL10	protein_coding
ENSG00000170293.9	380.519	-1.89813	0.269233	-7.05014	1.78732e-12	4.91039e-11	CMTM8	protein_coding
ENSG00000153551.13	648.914	-1.2723	0.225338	-5.64617	1.64058e-08	2.61058e-07	CMTM7	protein_coding
ENSG00000206557.6	12209.2	-1.13202	0.191046	-5.9254	3.11546e-09	5.60326e-08	TRIM71	protein_coding
ENSG00000173705.9	6.40811	5.71659	1.85934	3.07453	0.00210832	0.00975332	SUSD5	protein_coding
ENSG00000153558.15	152.107	1.57122	0.305743	5.13901	2.76184e-07	3.47638e-06	FBXL2	protein_coding
ENSG00000172995.16	3.85603	5.18996	2.05909	2.52051	0.0117186	0.0400187	ARPP21	protein_coding
ENSG00000168016.14	119.016	2.46526	0.383855	6.42236	1.34179e-10	2.92048e-09	TRANK1	protein_coding
ENSG00000076242.14	2073.35	1.37457	0.228423	6.01767	1.76946e-09	3.28784e-08	MLH1	protein_coding
ENSG00000144668.12	27.3823	3.40283	0.737692	4.61281	3.97261e-06	3.90502e-05	ITGA9	protein_coding
ENSG00000136059.14	52.4871	-3.52803	0.590923	-5.97038	2.36705e-09	4.32951e-08	VILL	protein_coding
ENSG00000187091.13	719.437	2.24111	0.309131	7.24971	4.17664e-13	1.24531e-11	PLCD1	protein_coding
ENSG00000008226.19	11.3017	3.4042	1.14312	2.97798	0.00290153	0.0127155	DLEC1	protein_coding
ENSG00000060971.18	2623.8	-1.42583	0.264505	-5.39054	7.02453e-08	9.97512e-07	ACAA1	protein_coding
ENSG00000172936.14	1224.7	-1.25298	0.259373	-4.83078	1.35999e-06	1.47232e-05	MYD88	protein_coding
ENSG00000093217.10	1890.36	-1.47272	0.201293	-7.3163	2.54903e-13	7.91581e-12	XYLB	protein_coding
ENSG00000168356.11	27.865	1.8937	0.687926	2.75277	0.00590925	0.0229332	SCN11A	protein_coding
ENSG00000114745.13	918.786	-1.01733	0.231431	-4.39581	1.10359e-05	9.92418e-05	GORASP1	protein_coding
ENSG00000168026.18	62.1706	1.21187	0.426102	2.84409	0.00445384	0.0181497	TTC21A	protein_coding
ENSG00000168314.17	4.48781	4.93655	1.96487	2.5124	0.0119911	0.0407793	MOBP	protein_coding
ENSG00000170011.14	14.214	2.77173	0.99155	2.79535	0.00518434	0.0206088	MYRIP	protein_coding
ENSG00000168032.9	3.63448	5.35521	2.14128	2.50094	0.0123866	0.0417915	ENTPD3	protein_coding
ENSG00000182606.15	5029.39	1.58358	0.207972	7.6144	2.64922e-14	9.06324e-13	TRAK1	protein_coding
ENSG00000157093.9	7.61137	5.64114	1.81089	3.11512	0.00183872	0.00871423	LYZL4	protein_coding
ENSG00000114812.13	14.6279	4.93932	1.16882	4.22591	2.37978e-05	0.000197696	VIPR1	protein_coding
ENSG00000008324.11	360.758	-1.00682	0.289934	-3.47258	0.000515485	0.00294294	SS18L2	protein_coding
ENSG00000010282.14	5.13346	3.41299	1.49413	2.28427	0.0223558	0.0666417	HHATL	protein_coding
ENSG00000280571.2	20.0479	5.61131	1.21003	4.63734	3.52922e-06	3.51929e-05	AC006059.2	protein_coding
ENSG00000181061.13	2544.14	1.01059	0.229213	4.40897	1.03866e-05	9.37471e-05	HIGD1A	protein_coding
ENSG00000144648.16	202.595	2.13407	0.294481	7.2469	4.26419e-13	1.26721e-11	ACKR2	protein_coding
ENSG00000180432.5	44.5104	-1.97933	0.536199	-3.69141	0.000223014	0.00142623	CYP8B1	protein_coding
ENSG00000011198.9	401.234	1.05274	0.352201	2.98903	0.00279866	0.0123405	ABHD5	protein_coding
ENSG00000173769.4	6.26479	4.78877	1.82211	2.62815	0.00858499	0.0311428	TOPAZ1	protein_coding
ENSG00000163810.11	106.954	6.29664	0.585349	10.7571	5.48855e-27	5.77241e-25	TGM4	protein_coding
ENSG00000173585.16	3.01143	4.64863	2.3055	2.01632	0.0437665	0.11198	CCR9	protein_coding
ENSG00000012223.12	5.54359	4.80895	1.89817	2.53347	0.0112941	0.0388518	LTF	protein_coding
ENSG00000178038.17	4.41101	6.06073	2.00409	3.02418	0.0024931	0.0112136	ALS2CL	protein_coding
ENSG00000160799.11	1006.14	-1.11755	0.274756	-4.06742	4.75366e-05	0.000365469	CCDC12	protein_coding
ENSG00000047849.21	7647.32	-1.05775	0.209718	-5.04369	4.56643e-07	5.49359e-06	MAP4	protein_coding
ENSG00000164045.11	1646.52	-1.43512	0.220199	-6.51738	7.15482e-11	1.61608e-09	CDC25A	protein_coding
ENSG00000145040.4	88.924	5.76371	0.586488	9.8275	8.57189e-23	6.5752e-21	UCN2	protein_coding
ENSG00000114270.17	3228.45	4.24788	0.288074	14.7458	3.27437e-49	1.10199e-46	COL7A1	protein_coding
ENSG00000008300.17	1240.74	-1.65497	0.281814	-5.87257	4.29101e-09	7.52645e-08	CELSR3	protein_coding
ENSG00000178537.10	297.166	1.02852	0.294612	3.4911	0.000481033	0.00277157	SLC25A20	protein_coding
ENSG00000221883.3	23.9411	1.47752	0.691193	2.13764	0.0325456	0.0892502	ARIH2OS	protein_coding
ENSG00000145022.4	476.891	1.48143	0.253411	5.84597	5.03637e-09	8.73144e-08	TCTA	protein_coding
ENSG00000185614.5	19.5656	3.78072	0.881724	4.28787	1.80392e-05	0.000154579	INKA1	protein_coding
ENSG00000182179.13	169.969	-1.19669	0.381132	-3.13983	0.00169049	0.00812326	UBA7	protein_coding
ENSG00000164076.17	13.2924	-3.44831	1.33726	-2.57864	0.00991911	0.0350245	CAMKV	protein_coding
ENSG00000164077.14	292.648	-2.12066	0.306129	-6.92734	4.2882e-12	1.11767e-10	MON1A	protein_coding
ENSG00000001617.12	2530.04	2.0995	0.286817	7.32002	2.47941e-13	7.7085e-12	SEMA3F	protein_coding
ENSG00000188338.15	1413.64	-1.36137	0.291501	-4.67022	3.00878e-06	3.05023e-05	SLC38A3	protein_coding
ENSG00000114353.17	2634.68	-1.04861	0.278244	-3.76868	0.000164113	0.00108907	GNAI2	protein_coding
ENSG00000214706.10	1771.13	-1.94529	0.301638	-6.44909	1.12521e-10	2.47307e-09	IFRD2	protein_coding
ENSG00000088538.13	36.368	3.77582	0.658954	5.73003	1.00414e-08	1.65456e-07	DOCK3	protein_coding
ENSG00000145050.16	1728.68	-1.25558	0.22853	-5.49417	3.92558e-08	5.90757e-07	MANF	protein_coding
ENSG00000114767.7	882.035	-1.14368	0.271757	-4.20846	2.5712e-05	0.000211703	RRP9	protein_coding
ENSG00000041880.14	627.971	1.46603	0.284803	5.14752	2.63947e-07	3.3317e-06	PARP3	protein_coding
ENSG00000164086.10	951.373	-1.50232	0.280153	-5.3625	8.20791e-08	1.15279e-06	DUSP7	protein_coding
ENSG00000247596.9	1340.73	1.54205	0.286908	5.37471	7.67069e-08	1.08356e-06	TWF2	protein_coding
ENSG00000168237.18	1134.4	-2.24756	0.275877	-8.14697	3.73149e-16	1.58715e-14	GLYCTK	protein_coding
ENSG00000010318.21	275.069	1.07453	0.264602	4.06092	4.88788e-05	0.000374932	PHF7	protein_coding
ENSG00000010319.6	1375.55	-2.03133	0.240259	-8.45477	2.79636e-17	1.34205e-15	SEMA3G	protein_coding
ENSG00000114854.7	215.388	-1.9911	0.327525	-6.07923	1.20758e-09	2.31904e-08	TNNC1	protein_coding
ENSG00000010327.10	25.0842	1.52742	0.720532	2.11985	0.0340191	0.0922293	STAB1	protein_coding
ENSG00000168268.11	5696.41	-1.40886	0.278988	-5.0499	4.42045e-07	5.34424e-06	NT5DC2	protein_coding
ENSG00000163938.17	4370.81	-1.152	0.292364	-3.9403	8.13797e-05	0.000588522	GNL3	protein_coding
ENSG00000213533.12	59.7762	-1.51103	0.456132	-3.31271	0.000923965	0.00486731	STIMATE	protein_coding
ENSG00000157388.17	50.5058	4.01191	0.626337	6.40536	1.50012e-10	3.23891e-09	CACNA1D	protein_coding
ENSG00000157445.15	6.67885	6.23713	1.83981	3.39009	0.000698704	0.00383248	CACNA2D3	protein_coding
ENSG00000187672.13	17.5193	2.79126	0.888109	3.14292	0.0016727	0.00805506	ERC2	protein_coding
ENSG00000163947.11	2484.13	1.10395	0.200456	5.50721	3.64568e-08	5.5144e-07	ARHGEF3	protein_coding
ENSG00000174844.14	63.9078	2.75473	0.542944	5.07369	3.90177e-07	4.7794e-06	DNAH12	protein_coding
ENSG00000168301.13	404.163	-1.462	0.290834	-5.02692	4.98416e-07	5.92727e-06	KCTD6	protein_coding
ENSG00000168306.13	678.357	-1.76236	0.252541	-6.97849	2.98368e-12	7.9616e-11	ACOX2	protein_coding
ENSG00000163689.20	6.95672	4.77434	1.80493	2.64517	0.00816498	0.0299216	C3orf67	protein_coding
ENSG00000163618.18	12.3579	6.753	1.68846	3.99951	6.34742e-05	0.000472485	CADPS	protein_coding
ENSG00000163637.13	78.4592	5.91579	0.685962	8.62408	6.46092e-18	3.37774e-16	PRICKLE2	protein_coding
ENSG00000163638.13	22.2898	1.81259	0.804345	2.25349	0.024228	0.0711048	ADAMTS9	protein_coding
ENSG00000144749.13	2276.73	-2.36782	0.232872	-10.1679	2.75862e-24	2.45125e-22	LRIG1	protein_coding
ENSG00000183662.11	3.41776	4.81829	2.15924	2.23148	0.0256497	0.0743686	FAM19A1	protein_coding
ENSG00000163377.16	177.784	-1.56136	0.345819	-4.51496	6.33288e-06	5.98269e-05	FAM19A4	protein_coding
ENSG00000163412.13	57.5486	3.81659	0.55792	6.84075	7.87814e-12	1.99916e-10	EIF4E3	protein_coding
ENSG00000172986.12	298.644	-1.22483	0.308887	-3.9653	7.33052e-05	0.000536634	GXYLT2	protein_coding
ENSG00000121440.15	18.9601	3.74054	1.08534	3.44642	0.000568077	0.00319643	PDZRN3	protein_coding
ENSG00000113805.8	2.67869	4.95338	2.32739	2.1283	0.0333123	0.0906876	CNTN3	protein_coding
ENSG00000185008.17	10.134	5.1082	1.73469	2.94473	0.00323237	0.0138912	ROBO2	protein_coding
ENSG00000114480.13	1447.42	1.39678	0.240187	5.81537	6.04985e-09	1.03948e-07	GBE1	protein_coding
ENSG00000175161.13	6.73207	4.28634	1.53795	2.78706	0.00531893	0.021066	CADM2	protein_coding
ENSG00000206538.9	34.2952	5.40391	0.845994	6.38765	1.68456e-10	3.59677e-09	VGLL3	protein_coding
ENSG00000175105.7	919.772	1.72675	0.262021	6.5901	4.39526e-11	1.0184e-09	ZNF654	protein_coding
ENSG00000044524.11	6.25254	3.69207	1.5426	2.39341	0.0166924	0.0527692	EPHA3	protein_coding
ENSG00000169379.15	513.82	-1.36041	0.241284	-5.6382	1.71838e-08	2.71992e-07	ARL13B	protein_coding
ENSG00000178750.3	2.49632	4.71076	2.34933	2.00516	0.0449465	0.114347	STX19	protein_coding
ENSG00000178700.7	191.606	1.09707	0.301247	3.64176	0.000270783	0.00169228	DHFR2	protein_coding
ENSG00000080224.17	6.42999	3.80145	1.50834	2.52029	0.0117259	0.0400288	EPHA6	protein_coding
ENSG00000170854.18	1325.73	-1.29687	0.221179	-5.86345	4.53354e-09	7.93118e-08	RIOX2	protein_coding
ENSG00000144810.16	9.78644	4.86205	1.70344	2.85425	0.00431384	0.0176836	COL8A1	protein_coding
ENSG00000184220.12	586.797	-1.36588	0.25728	-5.30892	1.10277e-07	1.50563e-06	CMSS1	protein_coding
ENSG00000206535.8	276.873	-1.47951	0.273543	-5.40869	6.34875e-08	9.10191e-07	LNP1	protein_coding
ENSG00000144820.8	4.4025	5.21776	2.00033	2.60845	0.00909543	0.0326079	ADGRG7	protein_coding
ENSG00000154175.17	40.4563	7.22148	1.54676	4.66877	3.03008e-06	3.06736e-05	ABI3BP	protein_coding
ENSG00000081148.12	13.4837	2.59583	0.910232	2.85183	0.00434684	0.017808	IMPG2	protein_coding
ENSG00000170044.8	4.96148	5.61814	2.06036	2.72678	0.00639549	0.0245113	ZPLD1	protein_coding
ENSG00000114455.13	4.4437	5.24752	2.09456	2.50531	0.0122346	0.0413823	HHLA2	protein_coding
ENSG00000144821.9	23.7633	2.68207	0.788048	3.40343	0.000665443	0.0036729	MYH15	protein_coding
ENSG00000198919.13	1127.04	2.07648	0.253929	8.17743	2.89951e-16	1.25914e-14	DZIP3	protein_coding
ENSG00000114487.9	4.74814	4.46939	1.93215	2.31316	0.0207136	0.0626691	MORC1	protein_coding
ENSG00000153283.12	5.0571	5.95342	1.9713	3.02005	0.00252734	0.011341	CD96	protein_coding
ENSG00000240891.7	695.457	2.96817	0.248434	11.9475	6.68969e-33	1.08502e-30	PLCXD2	protein_coding
ENSG00000144824.20	1466.64	-1.07737	0.223911	-4.81162	1.49715e-06	1.60466e-05	PHLDB2	protein_coding
ENSG00000176040.13	13.6506	6.45107	1.66309	3.87897	0.000104898	0.000734725	TMPRSS7	protein_coding
ENSG00000114529.12	146.987	1.70216	0.325405	5.2309	1.68684e-07	2.2079e-06	C3orf52	protein_coding
ENSG00000163606.11	5.27154	5.80526	1.99786	2.90574	0.00366385	0.0154351	CD200R1	protein_coding
ENSG00000144857.14	3.63379	4.83628	2.0854	2.31911	0.020389	0.0618818	BOC	protein_coding
ENSG00000072858.10	15.9017	5.2148	1.25511	4.15484	3.25517e-05	0.000262638	SIDT1	protein_coding
ENSG00000176542.10	1738.91	-1.12321	0.283933	-3.95589	7.62487e-05	0.000555143	USF3	protein_coding
ENSG00000178075.20	20.4268	3.75733	0.919185	4.08768	4.35716e-05	0.000338564	GRAMD1C	protein_coding
ENSG00000163617.11	63.8389	1.83454	0.458324	4.00271	6.26205e-05	0.000466905	CCDC191	protein_coding
ENSG00000181847.12	3.58986	5.30973	2.13759	2.48398	0.0129923	0.0433462	TIGIT	protein_coding
ENSG00000185565.12	12.0154	4.60826	1.3207	3.48927	0.00048435	0.00278885	LSAMP	protein_coding
ENSG00000144847.12	7.82147	3.14296	1.52583	2.05984	0.0394138	0.103534	IGSF11	protein_coding
ENSG00000031081.10	13.2076	3.7522	1.06754	3.5148	0.000440083	0.00256578	ARHGAP31	protein_coding
ENSG00000144843.11	14.6057	2.62195	0.982302	2.66919	0.00760352	0.0281998	ADPRH	protein_coding
ENSG00000144837.9	4.0504	4.1618	2.02942	2.05073	0.0402935	0.105165	PLA1A	protein_coding
ENSG00000121577.13	18.3266	2.54272	0.858624	2.96139	0.00306258	0.0132759	POPDC2	protein_coding
ENSG00000183833.16	3.43416	5.64445	2.15071	2.62446	0.00867863	0.031398	MAATS1	protein_coding
ENSG00000163428.4	3560.89	-1.66343	0.235375	-7.06715	1.58142e-12	4.36252e-11	LRRC58	protein_coding
ENSG00000113924.12	4169.81	-1.07242	0.226359	-4.7377	2.16158e-06	2.24965e-05	HGD	protein_coding
ENSG00000145087.12	22.8778	6.06127	1.59052	3.81087	0.00013848	0.000939865	STXBP5L	protein_coding
ENSG00000186103.4	2.24069	5.1934	2.52476	2.05699	0.0396874	0.104035	ARGFX	protein_coding
ENSG00000163833.8	3.73851	5.31558	2.07969	2.55595	0.0105897	0.0368463	FBXO40	protein_coding
ENSG00000145103.14	3.00076	4.83676	2.19178	2.20677	0.0273301	0.078107	ILDR1	protein_coding
ENSG00000114013.16	4.57135	5.28162	1.98619	2.65917	0.00783329	0.0288909	CD86	protein_coding
ENSG00000036828.16	4.34813	5.91729	2.05916	2.87364	0.00405769	0.0168127	CASR	protein_coding
ENSG00000121552.4	3372.16	9.59656	0.366047	26.2167	1.71262e-151	4.61105e-147	CSTA	protein_coding
ENSG00000114030.13	2817.15	1.08214	0.252381	4.28773	1.80504e-05	0.000154626	KPNA1	protein_coding
ENSG00000173200.13	6.5198	5.06589	1.83991	2.75334	0.00589902	0.022902	PARP15	protein_coding
ENSG00000173193.15	1529.03	1.23961	0.23909	5.18469	2.16375e-07	2.77545e-06	PARP14	protein_coding
ENSG00000082684.15	5.28979	5.97361	1.97302	3.02765	0.00246467	0.0111172	SEMA5B	protein_coding
ENSG00000121542.12	250.807	1.43092	0.297966	4.80228	1.56871e-06	1.67271e-05	SEC22A	protein_coding
ENSG00000206527.10	3797.71	-1.05835	0.261731	-4.04364	5.2627e-05	0.000399923	HACD2	protein_coding
ENSG00000065534.18	1893.51	-1.74356	0.234091	-7.44821	9.46165e-14	3.07664e-12	MYLK	protein_coding
ENSG00000173702.7	232.841	1.52736	0.413229	3.69615	0.000218891	0.00140387	MUC13	protein_coding
ENSG00000221955.10	45.3491	1.65236	0.541473	3.05161	0.00227618	0.01041	SLC12A8	protein_coding
ENSG00000189366.9	4.75939	3.7093	1.66294	2.23056	0.0257101	0.0745043	ALG1L	protein_coding
ENSG00000163884.4	315.897	-2.01496	0.293652	-6.86173	6.80321e-12	1.74281e-10	KLF15	protein_coding
ENSG00000163885.12	6.32739	3.77169	1.5813	2.38518	0.0170707	0.053718	CFAP100	protein_coding
ENSG00000180767.9	829.385	-2.14232	0.29377	-7.29249	3.04279e-13	9.30956e-12	CHST13	protein_coding
ENSG00000159685.10	437.994	-1.49972	0.313847	-4.77848	1.76622e-06	1.86631e-05	CHCHD6	protein_coding
ENSG00000163870.15	527.27	-1.19975	0.289563	-4.1433	3.42338e-05	0.000273911	TPRA1	protein_coding
ENSG00000073111.14	5862.22	-2.22207	0.29619	-7.50219	6.27603e-14	2.05817e-12	MCM2	protein_coding
ENSG00000114631.11	1037.98	-1.79198	0.271591	-6.59809	4.16495e-11	9.67534e-10	PODXL2	protein_coding
ENSG00000114626.18	118.126	1.7448	0.399105	4.3718	1.23229e-05	0.00010968	ABTB1	protein_coding
ENSG00000187715.13	3.76856	4.87252	2.1354	2.28179	0.022502	0.0670107	KBTBD12	protein_coding
ENSG00000114656.11	41.3142	2.33608	0.545858	4.27964	1.87197e-05	0.000159497	KIAA1257	protein_coding
ENSG00000172780.16	194.26	1.16088	0.317317	3.65843	0.000253768	0.00159749	RAB43	protein_coding
ENSG00000184897.6	1373.13	-1.01309	0.248508	-4.07668	4.56829e-05	0.000353134	H1FX	protein_coding
ENSG00000172771.12	81.0278	-1.58608	0.431496	-3.67576	0.000237138	0.00150618	EFCAB12	protein_coding
ENSG00000004399.12	6179.5	-1.29281	0.280704	-4.6056	4.11281e-06	4.03106e-05	PLXND1	protein_coding
ENSG00000172765.17	2026.82	-1.46406	0.221169	-6.61963	3.60098e-11	8.43068e-10	TMCC1	protein_coding
ENSG00000251287.8	26.2746	3.48314	0.701629	4.96436	6.89296e-07	7.94461e-06	ALG1L2	protein_coding
ENSG00000172752.14	14.3286	6.46655	1.65369	3.91038	9.21509e-05	0.000655858	COL6A5	protein_coding
ENSG00000206384.10	18.0035	5.15858	1.24146	4.15524	3.24944e-05	0.000262255	COL6A6	protein_coding
ENSG00000114670.14	113.05	1.538	0.362422	4.24367	2.19889e-05	0.000183974	NEK11	protein_coding
ENSG00000198585.11	676.656	-1.37852	0.231903	-5.94439	2.77487e-09	5.0412e-08	NUDT16	protein_coding
ENSG00000114686.9	3683.26	-1.17083	0.216212	-5.41521	6.1218e-08	8.81408e-07	MRPL3	protein_coding
ENSG00000196353.11	8.34221	5.89575	1.77936	3.3134	0.000921675	0.0048581	CPNE4	protein_coding
ENSG00000144868.13	5.81757	5.83162	1.94592	2.99685	0.00272789	0.0120759	TMEM108	protein_coding
ENSG00000144867.11	2067.8	-1.15876	0.234629	-4.93871	7.86427e-07	8.96813e-06	SRPRB	protein_coding
ENSG00000154917.11	27.6307	2.97057	0.725903	4.09223	4.27236e-05	0.000333128	RAB6B	protein_coding
ENSG00000073711.11	84.6338	2.2121	0.44543	4.96621	6.82732e-07	7.88245e-06	PPP2R3A	protein_coding
ENSG00000118007.13	1838.18	-1.10504	0.248243	-4.45144	8.52949e-06	7.85659e-05	STAG1	protein_coding
ENSG00000168917.9	685.284	1.66024	0.224715	7.38818	1.48848e-13	4.7371e-12	SLC35G2	protein_coding
ENSG00000066405.13	10.1953	6.68279	1.73103	3.8606	0.000113111	0.000785709	CLDN18	protein_coding
ENSG00000158220.14	366.168	-1.0909	0.275001	-3.96689	7.28154e-05	0.000533755	ESYT3	protein_coding
ENSG00000206262.9	8.07952	3.81189	1.43237	2.66125	0.00778513	0.0287448	FOXL2NB	protein_coding
ENSG00000114115.9	607.507	1.75559	0.303196	5.79029	7.02635e-09	1.18755e-07	RBP1	protein_coding
ENSG00000158258.16	22.9132	7.87173	1.57778	4.98912	6.06558e-07	7.09117e-06	CLSTN2	protein_coding
ENSG00000114126.17	1621.19	-1.5869	0.214037	-7.41414	1.22416e-13	3.91907e-12	TFDP2	protein_coding
ENSG00000175066.16	759.318	-1.08169	0.244025	-4.43271	9.30576e-06	8.49316e-05	GK5	protein_coding
ENSG00000120756.13	614.865	-1.09313	0.297971	-3.66856	0.000243917	0.00154409	PLS1	protein_coding
ENSG00000163710.9	220.548	3.27864	0.686243	4.77767	1.77339e-06	1.87315e-05	PCOLCE2	protein_coding
ENSG00000188582.8	308.791	1.30714	0.304024	4.29945	1.71225e-05	0.000147333	PAQR9	protein_coding
ENSG00000181804.15	5.88036	5.65322	1.91828	2.94702	0.00320848	0.0138106	SLC9A9	protein_coding
ENSG00000163762.7	4.34666	5.62169	1.99182	2.8224	0.00476664	0.0192179	TM4SF18	protein_coding
ENSG00000206199.10	40.9987	9.55718	1.54016	6.20531	5.45901e-10	1.09359e-08	ANKUB1	protein_coding
ENSG00000144893.12	78.4462	1.09425	0.397219	2.75477	0.00587335	0.0228319	MED12L	protein_coding
ENSG00000138271.5	45.5594	6.83352	0.979167	6.97891	2.97472e-12	7.94558e-11	GPR87	protein_coding
ENSG00000152580.8	11.3711	4.74018	1.68007	2.82142	0.00478112	0.0192618	IGSF10	protein_coding
ENSG00000114771.14	25.4189	-1.83217	0.685035	-2.67456	0.00748268	0.0278341	AADAC	protein_coding
ENSG00000152601.17	4059.63	-1.13462	0.208291	-5.44731	5.11386e-08	7.5238e-07	MBNL1	protein_coding
ENSG00000196549.10	7.58599	5.68975	1.80979	3.14387	0.0016673	0.00803624	MME	protein_coding
ENSG00000114805.17	308.844	-1.01593	0.277793	-3.65716	0.000255022	0.00160463	PLCH1	protein_coding
ENSG00000169282.17	9.27314	6.28166	1.74159	3.60686	0.000309927	0.00189561	KCNAB1	protein_coding
ENSG00000197980.12	11.7791	2.22155	1.02231	2.17306	0.0297756	0.0833666	LEKR1	protein_coding
ENSG00000197415.12	7.36009	6.34864	1.80838	3.51067	0.000446979	0.00260205	VEPH1	protein_coding
ENSG00000214216.10	4.19562	5.49786	2.02667	2.71276	0.00667252	0.0253544	IQCJ	protein_coding
ENSG00000169255.15	3.8917	5.2043	2.05496	2.53256	0.0113234	0.0389108	B3GALNT1	protein_coding
ENSG00000090402.8	4.88185	3.33254	1.62086	2.05603	0.0397801	0.104176	SI	protein_coding
ENSG00000169064.12	13.6163	5.5046	1.31222	4.19488	2.73011e-05	0.000223625	ZBBX	protein_coding
ENSG00000163536.12	143.251	-1.31086	0.373749	-3.50732	0.000452639	0.00263272	SERPINI1	protein_coding
ENSG00000085276.18	24.5327	1.68801	0.726346	2.32397	0.020127	0.0612757	MECOM	protein_coding
ENSG00000187033.9	3.81621	5.30946	2.10504	2.52227	0.0116601	0.039855	SAMD7	protein_coding
ENSG00000013297.11	392.855	-2.95775	0.338155	-8.74673	2.19622e-18	1.18499e-16	CLDN11	protein_coding
ENSG00000013293.6	6.72337	4.39198	1.8267	2.40433	0.0162022	0.0515513	SLC7A14	protein_coding
ENSG00000163584.18	813.745	-1.09019	0.256663	-4.24754	2.16129e-05	0.00018094	RPL22L1	protein_coding
ENSG00000163581.14	674.866	-1.02777	0.250792	-4.0981	4.16554e-05	0.000325381	SLC2A2	protein_coding
ENSG00000186329.9	18.353	2.35322	0.942862	2.49583	0.0125663	0.0422548	TMEM212	protein_coding
ENSG00000075420.13	17680.9	-1.03965	0.204858	-5.07498	3.87546e-07	4.74933e-06	FNDC3B	protein_coding
ENSG00000121858.11	77.7951	2.70855	0.503178	5.38288	7.33028e-08	1.03874e-06	TNFSF10	protein_coding
ENSG00000169760.17	8.60177	6.69034	1.75637	3.80918	0.000139428	0.000945509	NLGN1	protein_coding
ENSG00000177565.16	4609.91	-1.38293	0.226258	-6.11218	9.82782e-10	1.91188e-08	TBL1XR1	protein_coding
ENSG00000172667.11	5126.94	1.9896	0.224114	8.87762	6.83073e-19	3.8235e-17	ZMAT3	protein_coding
ENSG00000121864.10	854.465	-1.0481	0.269846	-3.88408	0.000102717	0.000720761	ZNF639	protein_coding
ENSG00000114450.10	38.7602	1.56161	0.575698	2.71255	0.00667675	0.0253619	GNB4	protein_coding
ENSG00000136521.13	1598.47	1.38964	0.241321	5.75849	8.48712e-09	1.42018e-07	NDUFB5	protein_coding
ENSG00000114757.19	8.47018	6.3257	1.76528	3.5834	0.000339153	0.00205153	PEX5L	protein_coding
ENSG00000284862.2	9.48064	6.01163	1.71591	3.50347	0.000459243	0.00266365	CCDC39	protein_coding
ENSG00000078081.8	94.3679	7.38531	0.810597	9.11096	8.16599e-20	4.97423e-18	LAMP3	protein_coding
ENSG00000053524.12	11.2793	3.90938	1.23701	3.16034	0.00157586	0.00766827	MCF2L2	protein_coding
ENSG00000172578.12	5.41036	4.59102	1.91384	2.39885	0.0164465	0.0521746	KLHL6	protein_coding
ENSG00000114796.16	848.277	1.60287	0.251619	6.37023	1.88746e-10	4.02677e-09	KLHL24	protein_coding
ENSG00000145198.14	45.0761	1.89952	0.558181	3.40306	0.000666353	0.0036769	VWA5B2	protein_coding
ENSG00000214160.9	1574.95	-1.06533	0.262523	-4.05803	4.94884e-05	0.000378745	ALG3	protein_coding
ENSG00000284753.1	271.624	-1.10083	0.323735	-3.40039	0.000672893	0.00371021	EEF1AKMT4	protein_coding
ENSG00000114859.16	675.489	-1.81987	0.276715	-6.57668	4.81057e-11	1.11081e-09	CLCN2	protein_coding
ENSG00000182580.3	46.231	3.37422	0.584725	5.77062	7.89816e-09	1.3281e-07	EPHB3	protein_coding
ENSG00000187068.3	402.043	-2.36015	0.268042	-8.80517	1.30657e-18	7.1646e-17	C3orf70	protein_coding
ENSG00000163900.11	1483.79	1.40175	0.255651	5.48308	4.17989e-08	6.25566e-07	TMEM41A	protein_coding
ENSG00000163898.10	15.2222	5.16128	1.26149	4.09142	4.28735e-05	0.000334006	LIPH	protein_coding
ENSG00000244405.8	4092.45	-1.14146	0.202306	-5.64221	1.67877e-08	2.66504e-07	ETV5	protein_coding
ENSG00000145192.13	69028.2	-1.48947	0.278098	-5.35593	8.51172e-08	1.19173e-06	AHSG	protein_coding
ENSG00000181092.10	16.7048	8.24004	1.62068	5.08431	3.68965e-07	4.53816e-06	ADIPOQ	protein_coding
ENSG00000175077.5	3.7342	5.53837	2.09636	2.6419	0.00824415	0.0301584	RTP1	protein_coding
ENSG00000136514.3	5.19828	3.978	1.98522	2.00381	0.0450899	0.114608	RTP4	protein_coding
ENSG00000073282.13	10.8062	7.00269	1.73511	4.03587	5.44005e-05	0.000412237	TP63	protein_coding
ENSG00000090530.10	16.1338	8.04737	1.64496	4.89213	9.97508e-07	1.11071e-05	P3H2	protein_coding
ENSG00000113946.3	21.6714	4.75615	0.969509	4.90573	9.30811e-07	1.04335e-05	CLDN16	protein_coding
ENSG00000198398.2	2.38253	4.69025	2.38969	1.9627	0.0496808	0.123384	TMEM207	protein_coding
ENSG00000188729.6	4.61505	5.75567	1.95631	2.94211	0.00325982	0.013998	OSTN	protein_coding
ENSG00000187527.10	2.32644	4.64838	2.34471	1.98249	0.0474241	0.119053	ATP13A5	protein_coding
ENSG00000127249.15	12.0957	2.15067	1.01773	2.11321	0.0345827	0.0934749	ATP13A4	protein_coding
ENSG00000178772.7	1342.86	-3.17997	0.286797	-11.0879	1.43686e-28	1.7348e-26	CPN2	protein_coding
ENSG00000172061.8	6.93626	5.00524	1.77898	2.81355	0.00489982	0.0196547	LRRC15	protein_coding
ENSG00000185112.5	384.217	2.44864	0.296549	8.25712	1.49226e-16	6.67402e-15	FAM43A	protein_coding
ENSG00000176945.17	19.8347	3.47693	0.891915	3.89827	9.68823e-05	0.000685535	MUC20	protein_coding
ENSG00000213123.11	8.54228	3.75776	1.24045	3.02935	0.00245084	0.0110641	TCTEX1D2	protein_coding
ENSG00000174007.8	39.9717	1.73588	0.573855	3.02495	0.00248673	0.0111905	CEP19	protein_coding
ENSG00000270170.2	729.313	-1.1299	0.243498	-4.6403	3.47908e-06	3.4796e-05	NCBP2-AS2	protein_coding
ENSG00000161267.12	556.799	1.61875	0.255005	6.34789	2.18289e-10	4.63503e-09	BDH1	protein_coding
ENSG00000185621.11	148.921	1.12402	0.317287	3.54259	0.000396218	0.00234353	LMLN	protein_coding
ENSG00000169020.10	978.72	-1.07421	0.284118	-3.78086	0.00015629	0.00104545	ATP5ME	protein_coding
ENSG00000168993.15	29.0644	-1.8062	0.648394	-2.78565	0.005342	0.0211294	CPLX1	protein_coding
ENSG00000127419.17	188.327	1.29807	0.340414	3.81322	0.000137166	0.00093165	TMEM175	protein_coding
ENSG00000145217.14	587.045	-3.24496	0.367492	-8.83	1.04675e-18	5.77515e-17	SLC26A1	protein_coding
ENSG00000127415.13	69.238	1.50424	0.44636	3.37	0.000751669	0.00408187	IDUA	protein_coding
ENSG00000127418.15	2214.24	-2.67587	0.306936	-8.71802	2.8312e-18	1.51244e-16	FGFRL1	protein_coding
ENSG00000159674.12	1047.99	-1.9468	0.293759	-6.6272	3.42116e-11	8.05169e-10	SPON2	protein_coding
ENSG00000163950.13	2131.4	-1.21727	0.216201	-5.63025	1.7995e-08	2.84329e-07	SLBP	protein_coding
ENSG00000068078.18	6989.89	-1.32	0.26433	-4.99377	5.92125e-07	6.93448e-06	FGFR3	protein_coding
ENSG00000168924.15	2938.13	-1.24724	0.275655	-4.52463	6.05006e-06	5.74777e-05	LETM1	protein_coding
ENSG00000185049.14	1406.87	-1.0879	0.293801	-3.70284	0.000213199	0.00137489	NELFA	protein_coding
ENSG00000206113.10	6.24586	3.54872	1.53759	2.30798	0.0210002	0.0633602	CFAP99	protein_coding
ENSG00000188981.11	41.0864	1.57168	0.562239	2.79539	0.00518373	0.0206088	MSANTD1	protein_coding
ENSG00000163956.12	6537.07	1.09364	0.271917	4.02194	5.77211e-05	0.000434951	LRPAP1	protein_coding
ENSG00000184160.7	1800.75	-1.26623	0.253697	-4.99111	6.00341e-07	7.02459e-06	ADRA2C	protein_coding
ENSG00000145220.14	1765.26	-1.24232	0.224775	-5.52695	3.25849e-08	4.9622e-07	LYAR	protein_coding
ENSG00000168824.14	91.3758	7.40312	0.817261	9.05845	1.32321e-19	7.88187e-18	NSG1	protein_coding
ENSG00000152953.13	4.27961	5.44961	1.99899	2.72618	0.00640725	0.0245424	STK32B	protein_coding
ENSG00000072840.13	799.139	-1.8119	0.272817	-6.64143	3.10649e-11	7.36908e-10	EVC	protein_coding
ENSG00000181215.15	5.50509	6.16822	1.86534	3.30676	0.000943819	0.00495252	C4orf50	protein_coding
ENSG00000109501.13	3868.06	-1.272	0.268426	-4.73876	2.1503e-06	2.23877e-05	WFS1	protein_coding
ENSG00000163993.7	2565.54	1.05658	0.240816	4.3875	1.14659e-05	0.000102868	S100P	protein_coding
ENSG00000173013.5	47.1997	2.25334	0.529005	4.25958	2.04807e-05	0.000172536	CCDC96	protein_coding
ENSG00000184985.16	572.243	8.6169	0.50396	17.0984	1.52581e-65	1.36936e-62	SORCS2	protein_coding
ENSG00000178597.7	8.55368	2.50517	1.19266	2.10049	0.035686	0.0958077	PSAPL1	protein_coding
ENSG00000196526.10	838.646	-1.3482	0.269676	-4.99934	5.75255e-07	6.74865e-06	AFAP1	protein_coding
ENSG00000163995.20	14.1919	3.1432	0.908806	3.45861	0.000542974	0.003074	ABLIM2	protein_coding
ENSG00000125089.17	1392.6	-1.55354	0.292081	-5.31887	1.04414e-07	1.43647e-06	SH3TC1	protein_coding
ENSG00000229924.3	16.8696	8.44486	1.63525	5.16428	2.41369e-07	3.06973e-06	FAM90A26	protein_coding
ENSG00000178163.8	5.30482	4.17637	1.91724	2.17833	0.0293818	0.0824983	ZNF518B	protein_coding
ENSG00000137449.15	387.446	1.28143	0.309242	4.14376	3.41652e-05	0.000273519	CPEB2	protein_coding
ENSG00000004468.13	4.80028	3.93914	1.89174	2.08229	0.037316	0.0992868	CD38	protein_coding
ENSG00000007062.11	971.936	-1.02258	0.247846	-4.12586	3.69349e-05	0.000292395	PROM1	protein_coding
ENSG00000169744.13	9.70413	6.61072	1.72035	3.84266	0.000121708	0.000840008	LDB2	protein_coding
ENSG00000047662.4	13.4132	4.09397	1.13213	3.61618	0.000298988	0.00183947	FAM184B	protein_coding
ENSG00000145147.20	53.3569	2.15689	0.500767	4.30718	1.65348e-05	0.000142824	SLIT2	protein_coding
ENSG00000185774.16	3.1772	5.23977	2.20014	2.38156	0.0172396	0.0541925	KCNIP4	protein_coding
ENSG00000109689.16	749.253	-1.02836	0.271713	-3.78472	0.000153882	0.00103191	STIM2	protein_coding
ENSG00000169851.15	7.1065	3.56657	1.52741	2.33505	0.0195407	0.0598537	PCDH7	protein_coding
ENSG00000174145.8	5.71388	4.07079	1.87705	2.16871	0.0301046	0.0840632	NWD2	protein_coding
ENSG00000154274.15	9.86177	4.24809	1.7522	2.42443	0.0153326	0.0493974	C4orf19	protein_coding
ENSG00000169299.14	1849.39	1.18072	0.218324	5.40813	6.3688e-08	9.12578e-07	PGM2	protein_coding
ENSG00000174125.8	8.61157	3.97222	1.76676	2.24831	0.0245563	0.071841	TLR1	protein_coding
ENSG00000134962.7	2128.8	-3.31443	0.25556	-12.9693	1.82682e-38	3.81282e-36	KLB	protein_coding
ENSG00000109814.12	14696.7	-1.26899	0.242364	-5.23589	1.64188e-07	2.15744e-06	UGDH	protein_coding
ENSG00000163683.12	1054.75	1.95009	0.213386	9.13877	6.31649e-20	3.88277e-18	SMIM14	protein_coding
ENSG00000163694.15	1056.41	3.41352	0.235943	14.4676	1.94116e-47	5.74328e-45	RBM47	protein_coding
ENSG00000179299.17	6.44209	2.64926	1.33849	1.97928	0.0477843	0.11959	NSUN7	protein_coding
ENSG00000064042.18	23.9154	4.81232	1.06289	4.52758	5.96637e-06	5.67179e-05	LIMCH1	protein_coding
ENSG00000188848.16	4.56836	5.49143	2.0211	2.71705	0.00658663	0.0251045	BEND4	protein_coding
ENSG00000124406.16	342.053	1.47548	0.321323	4.59188	4.39268e-06	4.28043e-05	ATP8A1	protein_coding
ENSG00000151834.15	3.27782	4.8364	2.11263	2.28928	0.0220629	0.0659219	GABRA2	protein_coding
ENSG00000163288.13	3.39332	4.3912	2.14379	2.04833	0.0405275	0.105651	GABRB1	protein_coding
ENSG00000163293.12	393.792	1.99126	0.260018	7.65819	1.8857e-14	6.61075e-13	NIPAL1	protein_coding
ENSG00000182223.7	2.25246	5.39579	2.45042	2.20199	0.0276663	0.0787989	ZAR1	protein_coding
ENSG00000109182.12	2.25676	5.09379	2.48199	2.0523	0.0401408	0.104876	CWH43	protein_coding
ENSG00000163069.12	607.829	1.29245	0.245938	5.25519	1.47872e-07	1.96802e-06	SGCB	protein_coding
ENSG00000163071.11	746.07	2.32128	0.238578	9.72967	2.25328e-22	1.6759e-20	SPATA18	protein_coding
ENSG00000226887.8	15.5437	3.00081	0.930986	3.22326	0.00126742	0.00636461	ERVMER34-1	protein_coding
ENSG00000184178.16	471.711	-1.38869	0.244959	-5.66907	1.43577e-08	2.30374e-07	SCFD2	protein_coding
ENSG00000109220.11	704.702	1.1649	0.2492	4.67456	2.94579e-06	2.99405e-05	CHIC2	protein_coding
ENSG00000134853.12	16.6196	2.33079	1.05757	2.20391	0.0275305	0.0785453	PDGFRA	protein_coding
ENSG00000128039.11	274.444	-1.38192	0.303099	-4.5593	5.1324e-06	4.92637e-05	SRD5A3	protein_coding
ENSG00000090989.18	946.154	1.14576	0.255271	4.48843	7.17516e-06	6.72178e-05	EXOC1	protein_coding
ENSG00000109265.14	275.748	-1.66953	0.276556	-6.03685	1.57148e-09	2.95052e-08	KIAA1211	protein_coding
ENSG00000128059.8	2586.63	-1.27157	0.222946	-5.7035	1.17374e-08	1.91294e-07	PPAT	protein_coding
ENSG00000128050.8	10116.7	-1.42102	0.263227	-5.39845	6.72193e-08	9.57573e-07	PAICS	protein_coding
ENSG00000163453.11	297.318	4.62385	0.31101	14.8672	5.38339e-50	1.88237e-47	IGFBP7	protein_coding
ENSG00000150471.16	13.0508	4.061	1.18921	3.41487	0.000638135	0.0035374	ADGRL3	protein_coding
ENSG00000145242.13	7.35759	5.87243	1.81944	3.2276	0.00124832	0.00628806	EPHA5	protein_coding
ENSG00000109163.6	4.4861	5.24078	2.02867	2.58336	0.00978428	0.0346211	GNRHR	protein_coding
ENSG00000153802.11	3.78685	5.22594	2.12718	2.45675	0.0140199	0.045956	TMPRSS11D	protein_coding
ENSG00000187054.15	2.91751	4.81827	2.29608	2.09848	0.0358629	0.096163	TMPRSS11A	protein_coding
ENSG00000185873.7	6.53131	3.87065	1.53571	2.52043	0.0117212	0.0400187	TMPRSS11B	protein_coding
ENSG00000087128.10	6.38962	5.57867	1.87538	2.97468	0.00293292	0.0128296	TMPRSS11E	protein_coding
ENSG00000213759.9	36.2818	3.19261	0.731152	4.36654	1.26231e-05	0.000112056	UGT2B11	protein_coding
ENSG00000156096.14	99.2717	1.76468	0.756309	2.33328	0.0196333	0.0600895	UGT2B4	protein_coding
ENSG00000126545.14	3.83673	4.59134	2.16032	2.1253	0.0335613	0.091227	CSN1S1	protein_coding
ENSG00000109205.16	305.949	-2.51098	0.33448	-7.50709	6.04545e-14	1.98497e-12	ODAM	protein_coding
ENSG00000178522.14	5.27844	5.77918	1.9971	2.89379	0.00380624	0.0159377	AMBN	protein_coding
ENSG00000132464.11	4.39361	3.88488	1.94299	1.99944	0.0455609	0.115485	ENAM	protein_coding
ENSG00000132465.11	3.95417	5.39412	2.07777	2.59611	0.00942864	0.0335789	JCHAIN	protein_coding
ENSG00000173542.8	2076.22	1.2756	0.234518	5.43926	5.35038e-08	7.80779e-07	MOB1B	protein_coding
ENSG00000080493.17	15.7687	3.27608	1.08924	3.00768	0.00263252	0.0117348	SLC4A4	protein_coding
ENSG00000156140.10	9.26816	6.14857	1.75027	3.51292	0.000443217	0.00258182	ADAMTS3	protein_coding
ENSG00000169429.11	283.256	2.35158	0.335279	7.01379	2.31956e-12	6.25375e-11	CXCL8	protein_coding
ENSG00000163738.18	413.844	-1.32554	0.272447	-4.86531	1.14276e-06	1.25429e-05	MTHFD2L	protein_coding
ENSG00000169116.11	16.4741	4.15285	1.12202	3.70121	0.000214571	0.00138175	PARM1	protein_coding
ENSG00000138769.11	7.0643	4.08243	1.50961	2.70429	0.00684509	0.0258699	CDKL2	protein_coding
ENSG00000156194.18	4.73951	4.15905	1.91696	2.16961	0.0300364	0.0839335	PPEF2	protein_coding
ENSG00000138744.15	431.468	-1.62191	0.251695	-6.44396	1.16396e-10	2.54991e-09	NAAA	protein_coding
ENSG00000156219.16	8.95665	6.8471	1.75238	3.90731	9.33283e-05	0.00066335	ART3	protein_coding
ENSG00000169248.12	2.85908	5.00555	2.37021	2.11185	0.0346989	0.0937046	CXCL11	protein_coding
ENSG00000163749.17	9.45034	7.04663	1.76794	3.98578	6.72589e-05	0.000497357	CCDC158	protein_coding
ENSG00000138771.16	69.3284	6.25566	0.738408	8.47182	2.41592e-17	1.1678e-15	SHROOM3	protein_coding
ENSG00000138758.11	4417.28	-1.01951	0.271506	-3.75503	0.00017332	0.00114385	SEPT11	protein_coding
ENSG00000138764.15	1023.57	1.35941	0.258059	5.26781	1.38061e-07	1.85118e-06	CCNG2	protein_coding
ENSG00000138759.19	14937.7	-1.84494	0.20638	-8.9395	3.90927e-19	2.23943e-17	FRAS1	protein_coding
ENSG00000138772.13	421.003	-1.4982	0.269575	-5.55764	2.73447e-08	4.21183e-07	ANXA3	protein_coding
ENSG00000152784.15	4.57043	4.68947	2.01747	2.32443	0.0201024	0.0612329	PRDM8	protein_coding
ENSG00000152785.7	3.10558	4.83649	2.13111	2.26947	0.0232401	0.0686995	BMP3	protein_coding
ENSG00000138669.9	11.4873	2.4002	0.939161	2.55568	0.010598	0.0368608	PRKG2	protein_coding
ENSG00000152795.17	9111.05	-1.27665	0.203807	-6.26401	3.75205e-10	7.70558e-09	HNRNPDL	protein_coding
ENSG00000145284.12	17.8283	6.55604	1.59595	4.10792	3.99245e-05	0.000313207	SCD5	protein_coding
ENSG00000138678.11	200.232	-2.17897	0.300616	-7.24835	4.21884e-13	1.25512e-11	GPAT3	protein_coding
ENSG00000109339.22	20.017	5.14246	1.25744	4.08963	4.32071e-05	0.000336119	MAPK10	protein_coding
ENSG00000163629.13	17.223	5.89152	1.66796	3.53217	0.000412167	0.00242614	PTPN13	protein_coding
ENSG00000198189.11	3936.84	-1.00104	0.260722	-3.83948	0.000123297	0.000849666	HSD17B11	protein_coding
ENSG00000152583.12	5.64685	3.15754	1.51809	2.07994	0.037531	0.0997616	SPARCL1	protein_coding
ENSG00000152592.13	3.39457	4.81829	2.1264	2.26593	0.0234554	0.0692524	DMP1	protein_coding
ENSG00000152595.16	3.37737	5.32839	2.16363	2.46271	0.0137892	0.0453809	MEPE	protein_coding
ENSG00000118785.14	9824.37	-2.47928	0.241727	-10.2565	1.10639e-24	1.02015e-22	SPP1	protein_coding
ENSG00000118777.12	1229.66	-1.06273	0.315974	-3.36333	0.000770069	0.00417086	ABCG2	protein_coding
ENSG00000163644.15	695.28	-1.2674	0.274111	-4.62367	3.77015e-06	3.72778e-05	PPM1K	protein_coding
ENSG00000138646.9	100.809	3.64687	0.511206	7.13386	9.75947e-13	2.75434e-11	HERC5	protein_coding
ENSG00000177432.7	53.8991	1.45921	0.520364	2.80421	0.00504399	0.020146	NAP1L5	protein_coding
ENSG00000180346.3	524.861	1.27852	0.280327	4.56082	5.09547e-06	4.89791e-05	TIGD2	protein_coding
ENSG00000184305.15	4.30092	4.44672	1.96672	2.26098	0.0237607	0.0700004	CCSER1	protein_coding
ENSG00000152208.13	9.58664	6.76069	1.7288	3.91063	9.2055e-05	0.000655685	GRID2	protein_coding
ENSG00000163106.10	3.13247	5.43424	2.25871	2.4059	0.0161327	0.0513666	HPGDS	protein_coding
ENSG00000138696.10	12.1479	5.24102	1.69358	3.09464	0.00197051	0.0092284	BMPR1B	protein_coding
ENSG00000182168.15	7.03374	6.06073	1.82168	3.327	0.000877863	0.00466277	UNC5C	protein_coding
ENSG00000198099.8	326.927	-1.12193	0.279638	-4.01209	6.01828e-05	0.000451229	ADH4	protein_coding
ENSG00000138823.13	2465.04	-2.97596	0.366288	-8.12466	4.48627e-16	1.87269e-14	MTTP	protein_coding
ENSG00000248713.1	10.1704	4.32892	1.70947	2.53232	0.011331	0.0389275	C4orf54	protein_coding
ENSG00000070190.13	3.09426	4.54894	2.23588	2.03451	0.0418998	0.108317	DAPP1	protein_coding
ENSG00000164035.10	4.37438	5.32139	1.98917	2.67518	0.00746885	0.0277942	EMCN	protein_coding
ENSG00000153064.12	16.229	4.16356	1.10062	3.78292	0.000154998	0.00103785	BANK1	protein_coding
ENSG00000164038.15	1247.17	-1.63679	0.243325	-6.72679	1.73444e-11	4.24914e-10	SLC9B2	protein_coding
ENSG00000169836.5	4.4955	5.6798	1.99895	2.84139	0.00449167	0.018279	TACR3	protein_coding
ENSG00000168769.13	1302.33	1.51416	0.284938	5.31399	1.07252e-07	1.46805e-06	TET2	protein_coding
ENSG00000138777.20	824.799	-1.36382	0.233329	-5.84507	5.06368e-09	8.76961e-08	PPA2	protein_coding
ENSG00000236699.9	10.3546	5.42548	1.69022	3.20993	0.00132767	0.00662825	ARHGEF38	protein_coding
ENSG00000155011.9	4.70714	4.1313	1.96336	2.1042	0.0353611	0.0952063	DKK2	protein_coding
ENSG00000138801.9	3078.67	-1.19471	0.228666	-5.22468	1.74455e-07	2.279e-06	PAPSS1	protein_coding
ENSG00000138796.16	1374.34	-1.04715	0.239551	-4.37129	1.23516e-05	0.000109863	HADH	protein_coding
ENSG00000138795.10	55.5799	3.43198	0.703307	4.87978	1.06206e-06	1.17626e-05	LEF1	protein_coding
ENSG00000198856.13	4535.42	-1.2698	0.208728	-6.08352	1.17575e-09	2.26598e-08	OSTC	protein_coding
ENSG00000188517.16	16.0793	5.99729	1.6213	3.69906	0.000216397	0.00139052	COL25A1	protein_coding
ENSG00000005059.16	202.44	-1.2227	0.308351	-3.96529	7.33078e-05	0.000536634	MCUB	protein_coding
ENSG00000205403.13	925.703	-1.38515	0.260493	-5.3174	1.0526e-07	1.44519e-06	CFI	protein_coding
ENSG00000138798.12	13.8685	4.30494	1.6816	2.56003	0.0104662	0.0365206	EGF	protein_coding
ENSG00000170522.9	1473.29	-1.65235	0.244126	-6.76844	1.30182e-11	3.22448e-10	ELOVL6	protein_coding
ENSG00000138792.10	6.4039	5.99571	1.86596	3.2132	0.00131266	0.00655942	ENPEP	protein_coding
ENSG00000145365.11	216.9	-2.1796	0.331006	-6.58479	4.55533e-11	1.05458e-09	TIFA	protein_coding
ENSG00000073331.18	45.8957	1.07286	0.511592	2.09711	0.0359841	0.0963966	ALPK1	protein_coding
ENSG00000145362.18	234.672	-1.02956	0.318428	-3.23326	0.00122388	0.00618461	ANK2	protein_coding
ENSG00000145349.17	2166.43	-1.76287	0.222848	-7.91067	2.56016e-15	1.00481e-13	CAMK2D	protein_coding
ENSG00000164100.9	3.2757	5.32831	2.17964	2.44458	0.0145023	0.0472367	NDST3	protein_coding
ENSG00000164099.3	11.1272	2.46431	1.04422	2.35995	0.0182774	0.0566937	PRSS12	protein_coding
ENSG00000150961.15	3421.12	-1.63166	0.200325	-8.1451	3.78965e-16	1.60935e-14	SEC24D	protein_coding
ENSG00000172403.11	21.2743	3.25694	0.836485	3.8936	9.87669e-05	0.000697586	SYNPO2	protein_coding
ENSG00000145384.3	74.7638	-1.6016	0.486488	-3.29216	0.000994194	0.0051765	FABP2	protein_coding
ENSG00000138735.16	47.2214	1.93242	0.532026	3.63219	0.000281031	0.00174544	PDE5A	protein_coding
ENSG00000138738.10	4.76409	6.28264	1.94467	3.23069	0.00123492	0.00623109	PRDM5	protein_coding
ENSG00000138686.9	646.789	1.19286	0.287738	4.14565	3.38856e-05	0.000272091	BBS7	protein_coding
ENSG00000138741.11	7.38801	6.1756	1.81403	3.40436	0.000663188	0.0036627	TRPC3	protein_coding
ENSG00000138685.15	11.1598	2.55202	1.15432	2.21083	0.0270473	0.0775281	FGF2	protein_coding
ENSG00000164066.13	1009.27	1.36452	0.25989	5.25036	1.51801e-07	2.01434e-06	INTU	protein_coding
ENSG00000164070.12	2543.08	1.89026	0.246041	7.68269	1.55777e-14	5.48973e-13	HSPA4L	protein_coding
ENSG00000077684.16	1515.11	-2.14954	0.209624	-10.2543	1.13227e-24	1.04045e-22	JADE1	protein_coding
ENSG00000151470.13	60.5464	1.01435	0.49485	2.0498	0.0403837	0.105347	C4orf33	protein_coding
ENSG00000151012.13	4730.19	-3.82945	0.283647	-13.5008	1.54767e-41	3.78814e-39	SLC7A11	protein_coding
ENSG00000145391.13	145.266	1.65796	0.415394	3.99129	6.57154e-05	0.000487954	SETD7	protein_coding
ENSG00000196782.12	27.4346	3.4304	0.809957	4.23528	2.28266e-05	0.000190451	MAML3	protein_coding
ENSG00000153132.13	277.383	-1.60971	0.352415	-4.56765	4.93224e-06	4.75288e-05	CLGN	protein_coding
ENSG00000205301.11	2.3745	5.17612	2.61173	1.98187	0.0474934	0.119136	MGAT4D	protein_coding
ENSG00000170153.11	23.4055	6.86261	1.57507	4.35702	1.31848e-05	0.000116427	RNF150	protein_coding
ENSG00000109452.12	9.10012	3.2453	1.23458	2.62867	0.00857186	0.0310994	INPP4B	protein_coding
ENSG00000164167.12	580.366	-1.49296	0.239607	-6.23088	4.63826e-10	9.40365e-09	LSM6	protein_coding
ENSG00000120519.14	454.737	-1.03871	0.347331	-2.99053	0.00278491	0.0122919	SLC10A7	protein_coding
ENSG00000071205.11	91.8674	3.836	0.450971	8.5061	1.79883e-17	8.91928e-16	ARHGAP10	protein_coding
ENSG00000234828.8	3.59264	5.29595	2.12603	2.491	0.0127385	0.0427112	IQCM	protein_coding
ENSG00000170390.16	6.19978	2.71603	1.38188	1.96546	0.0493606	0.12277	DCLK2	protein_coding
ENSG00000181541.5	3.38154	5.17569	2.17	2.38511	0.0170738	0.0537199	MAB21L2	protein_coding
ENSG00000164142.16	488.731	-1.45218	0.254775	-5.69986	1.19908e-08	1.9507e-07	FAM160A1	protein_coding
ENSG00000170006.12	37.8843	5.7059	0.89004	6.41084	1.44719e-10	3.13217e-09	TMEM154	protein_coding
ENSG00000137460.8	31.2622	-1.90413	0.746918	-2.54931	0.0107936	0.0373915	FHDC1	protein_coding
ENSG00000109654.15	295.034	2.60489	0.293505	8.8751	6.98725e-19	3.89492e-17	TRIM2	protein_coding
ENSG00000121210.16	625.568	-1.13241	0.231452	-4.89264	9.94906e-07	1.10827e-05	TMEM131L	protein_coding
ENSG00000197410.13	25.7049	1.67649	0.713256	2.35047	0.0187496	0.0579049	DCHS2	protein_coding
ENSG00000171564.11	1310.99	-1.49919	0.260885	-5.74655	9.10808e-09	1.51468e-07	FGB	protein_coding
ENSG00000171560.15	6069.68	-1.45025	0.291991	-4.96675	6.80845e-07	7.86404e-06	FGA	protein_coding
ENSG00000171557.16	8309.26	-2.0982	0.32668	-6.4228	1.33791e-10	2.9144e-09	FGG	protein_coding
ENSG00000121207.12	4.09077	5.40652	2.04404	2.64502	0.00816855	0.0299306	LRAT	protein_coding
ENSG00000256043.3	8.63823	3.41589	1.4456	2.36295	0.0181301	0.0563991	CTSO	protein_coding
ENSG00000120251.20	4.21964	5.69022	1.96575	2.89467	0.00379554	0.0159052	GRIA2	protein_coding
ENSG00000164125.15	10663.8	1.67694	0.22803	7.35401	1.92344e-13	6.05691e-12	GASK1B	protein_coding
ENSG00000171509.16	6.25414	4.32422	1.86089	2.32374	0.0201397	0.0613048	RXFP1	protein_coding
ENSG00000205208.5	976.777	-1.07015	0.233049	-4.59196	4.39098e-06	4.28034e-05	C4orf46	protein_coding
ENSG00000052795.13	2231.48	-1.27541	0.227953	-5.59506	2.20541e-08	3.43625e-07	FNIP2	protein_coding
ENSG00000145414.9	810.947	-1.02629	0.223958	-4.58252	4.59404e-06	4.46051e-05	NAF1	protein_coding
ENSG00000145416.13	7.03385	5.17198	1.77057	2.92107	0.00348826	0.0148276	MARCH1	protein_coding
ENSG00000052802.13	3194.49	-1.4929	0.230691	-6.47141	9.709e-11	2.15148e-09	MSMO1	protein_coding
ENSG00000109472.14	7633.4	1.52323	0.207507	7.34063	2.12598e-13	6.6713e-12	CPE	protein_coding
ENSG00000038295.8	5.08581	5.86003	1.89579	3.09107	0.00199438	0.00931586	TLL1	protein_coding
ENSG00000181381.13	29.1044	1.90643	0.668632	2.85124	0.00435497	0.0178305	DDX60L	protein_coding
ENSG00000129116.19	566.702	1.85669	0.271129	6.84799	7.48938e-12	1.9077e-10	PALLD	protein_coding
ENSG00000154447.15	694.82	-1.14771	0.251215	-4.56866	4.90854e-06	4.73513e-05	SH3RF1	protein_coding
ENSG00000198948.12	135.25	1.69706	0.35917	4.72495	2.30166e-06	2.38805e-05	MFAP3L	protein_coding
ENSG00000174473.16	3.34553	4.34346	2.19263	1.98094	0.047598	0.119305	GALNTL6	protein_coding
ENSG00000109586.12	125.258	2.10528	0.38599	5.45423	4.91846e-08	7.26012e-07	GALNT7	protein_coding
ENSG00000164105.4	199.774	-1.07882	0.352376	-3.06155	0.00220197	0.0101239	SAP30	protein_coding
ENSG00000164120.14	12.2339	4.63583	1.31273	3.53143	0.000413321	0.0024317	HPGD	protein_coding
ENSG00000145451.13	2.66955	4.75141	2.36247	2.01121	0.0443034	0.113107	GLRA3	protein_coding
ENSG00000038002.9	552.76	1.00029	0.228071	4.38589	1.15515e-05	0.000103567	AGA	protein_coding
ENSG00000218336.9	25.1366	3.28031	0.799887	4.10097	4.11417e-05	0.000322005	TENM3	protein_coding
ENSG00000151718.16	4577.33	-1.23314	0.226698	-5.43954	5.34169e-08	7.79933e-07	WWC2	protein_coding
ENSG00000173320.12	19.2127	3.09179	0.879766	3.51433	0.000440866	0.00256924	STOX2	protein_coding
ENSG00000109771.15	48.7219	1.73709	0.466174	3.72628	0.000194324	0.00126805	LRP2BP	protein_coding
ENSG00000205129.8	20.3166	4.03015	0.924788	4.35791	1.31308e-05	0.000116027	C4orf47	protein_coding
ENSG00000168491.10	2.96766	4.79951	2.2189	2.16302	0.03054	0.0849704	CCDC110	protein_coding
ENSG00000154553.15	575.746	1.68638	0.231999	7.26891	3.62407e-13	1.09634e-11	PDLIM3	protein_coding
ENSG00000154556.18	1811.22	-2.02279	0.208567	-9.69851	3.05931e-22	2.25052e-20	SORBS2	protein_coding
ENSG00000164342.12	7.12806	4.67097	1.82846	2.55459	0.0106312	0.0369524	TLR3	protein_coding
ENSG00000164344.16	10.7384	4.41827	1.39003	3.17855	0.00148011	0.00725876	KLKB1	protein_coding
ENSG00000153404.14	7.48631	2.52275	1.20048	2.10145	0.0356018	0.0956629	PLEKHG4B	protein_coding
ENSG00000286001.1	33.3047	1.54168	0.693807	2.22205	0.0262799	0.075772	AC021087.5	protein_coding
ENSG00000286169.1	13.4613	1.80373	0.878832	2.05242	0.0401292	0.104856	AHRR	protein_coding
ENSG00000066230.11	9.63529	3.44329	1.11662	3.08368	0.00204461	0.0094994	SLC9A3	protein_coding
ENSG00000206077.11	8.19159	2.68952	1.2048	2.23233	0.0255934	0.0742461	ZDHHC11B	protein_coding
ENSG00000188818.12	159.131	1.02823	0.394469	2.60662	0.00914398	0.0327548	ZDHHC11	protein_coding
ENSG00000071539.14	1368.19	-1.1517	0.211068	-5.45652	4.85553e-08	7.17904e-07	TRIP13	protein_coding
ENSG00000145506.13	198.234	2.33433	0.319294	7.31091	2.65343e-13	8.20218e-12	NKD2	protein_coding
ENSG00000174358.16	56.0164	-3.76177	0.854316	-4.40325	1.0664e-05	9.61225e-05	SLC6A19	protein_coding
ENSG00000164362.19	394.646	-2.40979	0.332179	-7.2545	4.03139e-13	1.20334e-11	TERT	protein_coding
ENSG00000215218.4	221	8.70426	0.780477	11.1525	6.96398e-29	8.60084e-27	UBE2QL1	protein_coding
ENSG00000078295.16	7.72473	4.03751	1.45698	2.77115	0.00558583	0.021904	ADCY2	protein_coding
ENSG00000112902.12	7.17782	3.46152	1.44538	2.39488	0.0166258	0.0526008	SEMA5A	protein_coding
ENSG00000164237.9	2203.67	2.33524	0.20772	11.2422	2.52907e-29	3.1671e-27	CMBL	protein_coding
ENSG00000112977.15	3391.17	-1.0079	0.232338	-4.33808	1.43731e-05	0.00012548	DAP	protein_coding
ENSG00000169862.19	10.0468	3.42221	1.2413	2.75696	0.00583422	0.0227245	CTNND2	protein_coding
ENSG00000039139.9	18.6127	4.25482	1.09596	3.88227	0.000103487	0.000725406	DNAH5	protein_coding
ENSG00000145569.6	176.859	3.54161	0.354133	10.0008	1.5117e-23	1.24468e-21	OTULINL	protein_coding
ENSG00000154153.13	6.06797	4.00848	1.86526	2.14902	0.0316329	0.0872896	RETREG1	protein_coding
ENSG00000154162.14	3.06368	5.47467	2.18244	2.50851	0.0121243	0.0411075	CDH12	protein_coding
ENSG00000040731.10	8.24901	7.22127	3.17103	2.27726	0.0227705	0.067571	CDH10	protein_coding
ENSG00000133401.16	22.7416	4.53002	1.04571	4.33201	1.47757e-05	0.000128744	PDZD2	protein_coding
ENSG00000113389.16	17.9133	4.50882	1.23789	3.64234	0.000270176	0.00168893	NPR3	protein_coding
ENSG00000151388.11	12.0916	3.29006	1.20245	2.73612	0.00621678	0.0239389	ADAMTS12	protein_coding
ENSG00000242110.8	155.968	-1.08033	0.363097	-2.97533	0.00292675	0.0128067	AMACR	protein_coding
ENSG00000082196.20	91.517	-1.23272	0.378926	-3.25319	0.00114115	0.00581411	C1QTNF3	protein_coding
ENSG00000168724.16	1976.41	1.0252	0.255549	4.01173	6.02745e-05	0.00045179	DNAJC21	protein_coding
ENSG00000113494.17	1156.72	-1.26781	0.289597	-4.37783	1.19865e-05	0.000107111	PRLR	protein_coding
ENSG00000145626.11	3.1296	4.61563	2.33153	1.97966	0.047742	0.119517	UGT3A1	protein_coding
ENSG00000164187.7	502.148	1.12753	0.26844	4.2003	2.6656e-05	0.00021894	LMBRD2	protein_coding
ENSG00000145604.15	2401.1	-3.04667	0.238505	-12.774	2.29001e-37	4.60122e-35	SKP2	protein_coding
ENSG00000168621.15	1954.68	3.22248	0.221582	14.5431	6.46194e-48	1.99979e-45	GDNF	protein_coding
ENSG00000164318.18	11.4924	4.19133	1.35918	3.08371	0.00204435	0.0094994	EGFLAM	protein_coding
ENSG00000145623.13	3302.15	1.29705	0.236057	5.49464	3.91502e-08	5.8953e-07	OSMR	protein_coding
ENSG00000082074.17	17.0126	7.74153	1.6191	4.78138	1.74099e-06	1.84328e-05	FYB1	protein_coding
ENSG00000171522.6	15.5867	2.63764	1.3295	1.98393	0.0472637	0.118717	PTGER4	protein_coding
ENSG00000182836.10	8.39043	6.4705	1.78286	3.62928	0.000284212	0.00176235	PLCXD3	protein_coding
ENSG00000112964.14	10.9611	3.94028	1.19441	3.29894	0.000970512	0.00506789	GHR	protein_coding
ENSG00000112972.15	5870.33	-1.93242	0.261753	-7.38261	1.55211e-13	4.92796e-12	HMGCS1	protein_coding
ENSG00000170571.12	8.9194	6.79221	1.73748	3.90922	9.25938e-05	0.000658477	EMB	protein_coding
ENSG00000151883.18	41.4851	2.77905	0.768999	3.61386	0.000301676	0.0018523	PARP8	protein_coding
ENSG00000213949.9	1787.49	-1.43513	0.284742	-5.04009	4.65305e-07	5.58283e-06	ITGA1	protein_coding
ENSG00000164287.12	8.4051	6.52073	1.78338	3.65639	0.00025579	0.00160871	CDC20B	protein_coding
ENSG00000152670.18	16.778	4.39929	1.1009	3.99608	6.43993e-05	0.00047871	DDX4	protein_coding
ENSG00000164509.14	10.1756	3.26076	1.23958	2.63054	0.00852504	0.0309629	IL31RA	protein_coding
ENSG00000134352.20	11921.2	-1.08165	0.268303	-4.03147	5.54299e-05	0.000419212	IL6ST	protein_coding
ENSG00000164512.18	13.2199	2.13522	1.06105	2.01236	0.0441817	0.112839	ANKRD55	protein_coding
ENSG00000225940.6	3.10423	4.87328	2.19896	2.21618	0.0266794	0.076694	C5orf67	protein_coding
ENSG00000145632.15	955.21	2.1999	0.223558	9.84041	7.54001e-23	5.81682e-21	PLK2	protein_coding
ENSG00000035499.13	1869.11	-1.11971	0.227359	-4.92483	8.44343e-07	9.55975e-06	DEPDC1B	protein_coding
ENSG00000130449.6	416.116	1.29459	0.244696	5.29062	1.21902e-07	1.64598e-06	ZSWIM6	protein_coding
ENSG00000049192.15	558.323	1.03332	0.329848	3.13272	0.00173195	0.00828702	ADAMTS6	protein_coding
ENSG00000113597.18	394.685	1.28069	0.278836	4.59298	4.36961e-06	4.26259e-05	TRAPPC13	protein_coding
ENSG00000123213.23	2029.72	-1.19547	0.246373	-4.85227	1.22059e-06	1.33373e-05	NLN	protein_coding
ENSG00000069020.18	2073.65	2.8715	0.21166	13.5666	6.32059e-42	1.62072e-39	MAST4	protein_coding
ENSG00000152939.16	1695.18	1.91132	0.21232	9.00206	2.21525e-19	1.30226e-17	MARVELD2	protein_coding
ENSG00000205571.13	662.26	1.01572	0.231719	4.38341	1.16836e-05	0.000104647	SMN2	protein_coding
ENSG00000178175.12	3.61867	4.79987	2.14603	2.23662	0.0253109	0.0735882	ZNF366	protein_coding
ENSG00000157107.14	1174.92	1.38677	0.280638	4.94148	7.75315e-07	8.85266e-06	FCHO2	protein_coding
ENSG00000251493.5	13.276	2.82651	1.02511	2.75728	0.00582836	0.0227108	FOXD1	protein_coding
ENSG00000164331.10	1430.68	3.45217	0.245989	14.0339	9.67435e-45	2.60472e-42	ANKRA2	protein_coding
ENSG00000145700.9	28.776	3.20917	0.701664	4.57366	4.79286e-06	4.63516e-05	ANKRD31	protein_coding
ENSG00000113161.16	6287.31	-1.43569	0.247277	-5.80601	6.39775e-09	1.08952e-07	HMGCR	protein_coding
ENSG00000152359.14	551.963	1.57632	0.268095	5.87973	4.10939e-09	7.24091e-08	POC5	protein_coding
ENSG00000122012.14	21.5718	7.77305	1.58922	4.8911	1.00272e-06	1.11605e-05	SV2C	protein_coding
ENSG00000164220.7	6.67681	5.89621	1.86593	3.15994	0.00157804	0.00767607	F2RL2	protein_coding
ENSG00000171643.14	5.5133	5.0735	1.90446	2.66401	0.00772151	0.0285568	S100Z	protein_coding
ENSG00000145708.11	2.04565	5.06074	2.51987	2.00833	0.0446079	0.113701	CRHBP	protein_coding
ENSG00000132846.6	914.813	-1.87748	0.234203	-8.01648	1.08823e-15	4.39271e-14	ZBED3	protein_coding
ENSG00000171540.7	70.785	7.4568	0.935037	7.97488	1.52532e-15	6.09954e-14	OTP	protein_coding
ENSG00000145685.14	2152.55	-1.15739	0.220038	-5.25998	1.44072e-07	1.9241e-06	LHFPL2	protein_coding
ENSG00000113273.17	4072.43	-1.62305	0.229262	-7.07944	1.44735e-12	4.02152e-11	ARSB	protein_coding
ENSG00000152413.14	1031.31	-1.00127	0.249926	-4.00625	6.16906e-05	0.000460732	HOMER1	protein_coding
ENSG00000164309.15	60.048	1.40665	0.576129	2.44155	0.0146243	0.0475766	CMYA5	protein_coding
ENSG00000113296.14	27.9814	1.72492	0.635232	2.71541	0.00661936	0.0252043	THBS4	protein_coding
ENSG00000131730.16	36.1383	-1.34248	0.567435	-2.36587	0.0179877	0.056047	CKMT2	protein_coding
ENSG00000172497.9	3.87409	4.02137	2.04169	1.96963	0.0488805	0.121767	ACOT12	protein_coding
ENSG00000145687.16	10.8715	3.65193	1.37504	2.65587	0.0079104	0.0291274	SSBP2	protein_coding
ENSG00000038427.16	1424.7	1.23749	0.26884	4.60306	4.16338e-06	4.07248e-05	VCAN	protein_coding
ENSG00000164176.13	11.4523	4.83157	1.32201	3.65472	0.000257467	0.00161888	EDIL3	protein_coding
ENSG00000113356.12	286.954	-2.25223	0.313688	-7.17985	6.97885e-13	2.02259e-11	POLR3G	protein_coding
ENSG00000164199.18	63.8337	1.1307	0.49026	2.30632	0.0210929	0.0635808	ADGRV1	protein_coding
ENSG00000175745.13	1041.44	-1.56911	0.218916	-7.16765	7.62969e-13	2.19233e-11	NR2F1	protein_coding
ENSG00000175471.19	17.0969	2.31738	0.893587	2.59335	0.00950471	0.0337883	MCTP1	protein_coding
ENSG00000178015.5	2.71697	5.23968	2.21908	2.3612	0.0182158	0.0565874	GPR150	protein_coding
ENSG00000164292.13	3424.24	1.10048	0.254356	4.32653	1.51476e-05	0.000131644	RHOBTB3	protein_coding
ENSG00000173221.14	1752.01	1.43421	0.249699	5.74376	9.25991e-09	1.53897e-07	GLRX	protein_coding
ENSG00000175426.11	7.22935	4.31711	1.85116	2.33212	0.0196946	0.0602496	PCSK1	protein_coding
ENSG00000145721.12	4.08729	4.83576	1.99898	2.41912	0.0155582	0.0499391	LIX1	protein_coding
ENSG00000173930.9	66.5599	-2.38959	0.583072	-4.09828	4.16231e-05	0.000325301	SLCO4C1	protein_coding
ENSG00000181751.10	204.318	-2.2552	0.328978	-6.85517	7.12257e-12	1.81771e-10	C5orf30	protein_coding
ENSG00000145743.15	486.993	-1.18271	0.255609	-4.62703	3.70954e-06	3.6746e-05	FBXL17	protein_coding
ENSG00000112893.9	5406.93	-1.09227	0.263733	-4.14157	3.44938e-05	0.000275582	MAN2A1	protein_coding
ENSG00000152495.11	7.98781	4.06321	1.46337	2.77661	0.00549285	0.0216118	CAMK4	protein_coding
ENSG00000134986.13	1473.09	-1.37306	0.229316	-5.98762	2.12934e-09	3.91334e-08	NREP	protein_coding
ENSG00000129595.13	11.5852	4.22249	1.33617	3.16016	0.00157685	0.00767168	EPB41L4A	protein_coding
ENSG00000212122.3	14.5476	4.09856	0.973346	4.2108	2.54467e-05	0.00020984	TSSK1B	protein_coding
ENSG00000164221.13	126.096	-1.72959	0.341767	-5.06071	4.17688e-07	5.07484e-06	CCDC112	protein_coding
ENSG00000092421.16	4475.26	-1.226	0.206892	-5.92582	3.10752e-09	5.59645e-08	SEMA6A	protein_coding
ENSG00000169570.10	256.106	-1.19996	0.343147	-3.49693	0.000470643	0.0027239	DTWD2	protein_coding
ENSG00000145779.8	693.298	1.87468	0.23025	8.14192	3.89069e-16	1.64706e-14	TNFAIP8	protein_coding
ENSG00000133835.15	4224.09	-1.12913	0.254304	-4.44006	8.99319e-06	8.24141e-05	HSD17B4	protein_coding
ENSG00000113083.14	2606.21	-3.25074	0.249039	-13.0531	6.09813e-39	1.31349e-36	LOX	protein_coding
ENSG00000064692.19	7.25904	5.7361	1.86945	3.06833	0.0021526	0.00992238	SNCAIP	protein_coding
ENSG00000205302.7	1827	1.25922	0.276083	4.56102	5.09067e-06	4.89504e-05	SNX2	protein_coding
ENSG00000164904.18	7071.52	1.88959	0.197119	9.58606	9.15129e-22	6.50104e-20	ALDH7A1	protein_coding
ENSG00000164902.14	1379.99	1.15062	0.237304	4.84871	1.24264e-06	1.35617e-05	PHAX	protein_coding
ENSG00000113368.12	3620.09	-1.67455	0.213356	-7.84863	4.20597e-15	1.59495e-13	LMNB1	protein_coding
ENSG00000173926.6	222.085	1.29461	0.325006	3.98334	6.79539e-05	0.00050167	MARCH3	protein_coding
ENSG00000145794.17	13.0541	6.99968	1.65653	4.2255	2.38407e-05	0.000197839	MEGF10	protein_coding
ENSG00000138829.12	504.776	8.40839	0.506853	16.5894	8.31684e-62	5.46153e-59	FBN2	protein_coding
ENSG00000113396.13	2.84464	5.20596	2.2895	2.27384	0.0229754	0.0680667	SLC27A6	protein_coding
ENSG00000145808.10	3.22128	4.48249	2.18164	2.05464	0.0399137	0.104455	ADAMTS19	protein_coding
ENSG00000072682.18	3090.42	1.63745	0.232604	7.03964	1.92744e-12	5.26312e-11	P4HA2	protein_coding
ENSG00000205089.7	4.52098	6.06075	2.01227	3.01189	0.00259627	0.0115981	CCNI2	protein_coding
ENSG00000198944.5	54.707	-1.08329	0.471238	-2.29882	0.0215154	0.0645582	SOWAHA	protein_coding
ENSG00000164403.14	866.114	-1.54155	0.307809	-5.00815	5.49557e-07	6.4754e-06	SHROOM1	protein_coding
ENSG00000164406.7	182.31	-1.76523	0.347112	-5.08546	3.6674e-07	4.51697e-06	LEAP2	protein_coding
ENSG00000069011.16	825.41	-1.52726	0.28575	-5.34472	9.05569e-08	1.26264e-06	PITX1	protein_coding
ENSG00000145832.14	6.56291	5.74596	1.83538	3.13066	0.00174417	0.00833511	SLC25A48	protein_coding
ENSG00000152377.14	18.4224	4.31819	1.00042	4.31637	1.58618e-05	0.000137452	SPOCK1	protein_coding
ENSG00000146021.15	27.5164	2.45189	0.685967	3.57435	0.000351097	0.00211133	KLHL3	protein_coding
ENSG00000177733.6	5703.61	-1.20558	0.225572	-5.34455	9.06419e-08	1.26317e-06	HNRNPA0	protein_coding
ENSG00000078795.16	2.66124	4.9178	2.36856	2.07628	0.0378678	0.100439	PKD2L2	protein_coding
ENSG00000132563.16	965.06	3.96818	0.297829	13.3237	1.68597e-40	3.87974e-38	REEP2	protein_coding
ENSG00000120738.8	1272.11	2.55087	0.275826	9.24813	2.28465e-20	1.46109e-18	EGR1	protein_coding
ENSG00000146006.8	6.04594	6.05262	1.8836	3.21333	0.00131208	0.0065577	LRRTM2	protein_coding
ENSG00000280987.4	43.6558	-2.18714	0.527592	-4.14551	3.39051e-05	0.000272091	MATR3	protein_coding
ENSG00000170464.10	215.216	1.58331	0.301679	5.24831	1.53501e-07	2.03189e-06	DNAJC18	protein_coding
ENSG00000184584.13	245.868	3.22088	0.328175	9.81452	9.75044e-23	7.43685e-21	TMEM173	protein_coding
ENSG00000146005.4	10.3487	2.0892	0.960113	2.176	0.0295555	0.0828737	PSD2	protein_coding
ENSG00000158458.20	7.40874	5.4462	1.77354	3.07081	0.00213481	0.00985727	NRG2	protein_coding
ENSG00000213523.10	1040.71	1.05431	0.24798	4.25161	2.12238e-05	0.000178126	SRA1	protein_coding
ENSG00000113108.19	14.1668	2.14933	0.870409	2.46934	0.0135364	0.0447126	APBB3	protein_coding
ENSG00000204970.9	3.54255	4.54811	2.09102	2.17507	0.0296249	0.0830337	PCDHA1	protein_coding
ENSG00000255408.4	4.69156	4.04009	1.97478	2.04585	0.0407715	0.106194	PCDHA3	protein_coding
ENSG00000204967.11	6.4596	6.08849	1.81517	3.35423	0.000795859	0.00428811	PCDHA4	protein_coding
ENSG00000197479.6	10.3961	1.91705	0.963998	1.98864	0.0467409	0.117733	PCDHB11	protein_coding
ENSG00000240184.7	43.6002	-1.40171	0.505299	-2.77403	0.00553669	0.0217557	PCDHGC3	protein_coding
ENSG00000120318.16	64.5701	1.32756	0.475038	2.79464	0.00519576	0.0206481	ARAP3	protein_coding
ENSG00000113555.5	3.56679	4.17602	2.09605	1.99233	0.0463349	0.116995	PCDH12	protein_coding
ENSG00000113578.18	18.214	8.03423	1.6063	5.00171	5.6825e-07	6.68103e-06	FGF1	protein_coding
ENSG00000145819.17	2039.68	-1.39654	0.204482	-6.82962	8.51375e-12	2.14449e-10	ARHGAP26	protein_coding
ENSG00000113580.15	2609.48	1.33185	0.252622	5.27211	1.34861e-07	1.81007e-06	NR3C1	protein_coding
ENSG00000186314.11	343.706	-1.18973	0.315347	-3.77275	0.00016146	0.00107337	PRELID2	protein_coding
ENSG00000204928.2	4.59218	4.08602	1.98311	2.06041	0.039359	0.103412	GRXCR2	protein_coding
ENSG00000156463.18	474.867	-3.21681	0.315153	-10.2071	1.84213e-24	1.66434e-22	SH3RF2	protein_coding
ENSG00000156475.18	6.50997	3.11567	1.51102	2.06197	0.0392108	0.103167	PPP2R2B	protein_coding
ENSG00000169302.16	5.35945	5.69008	1.90437	2.98791	0.00280891	0.0123776	STK32A	protein_coding
ENSG00000113657.13	20.1877	3.08155	0.810692	3.80113	0.000144038	0.000973659	DPYSL3	protein_coding
ENSG00000176049.16	5.55868	3.83616	1.86488	2.05705	0.0396812	0.104029	JAKMIP2	protein_coding
ENSG00000164266.10	25.7827	3.84647	1.65458	2.32473	0.0200862	0.0612041	SPINK1	protein_coding
ENSG00000133710.15	10.8879	4.10053	1.23754	3.31345	0.000921517	0.0048581	SPINK5	protein_coding
ENSG00000169252.5	16.1539	5.22439	1.10951	4.70875	2.49244e-06	2.57508e-05	ADRB2	protein_coding
ENSG00000164284.15	1868.82	-1.0174	0.225132	-4.51913	6.20949e-06	5.87849e-05	GRPEL2	protein_coding
ENSG00000145882.11	82.0269	3.51751	0.448759	7.8383	4.56696e-15	1.72456e-13	PCYOX1L	protein_coding
ENSG00000183111.12	42.8425	3.74473	0.596927	6.27335	3.53368e-10	7.29047e-09	ARHGEF37	protein_coding
ENSG00000132915.11	6.9608	6.45591	1.8233	3.54079	0.000398924	0.00235747	PDE6A	protein_coding
ENSG00000164296.7	99.5566	1.27333	0.369971	3.4417	0.000578069	0.00324316	TIGD6	protein_coding
ENSG00000182578.13	60.9067	7.18109	0.933138	7.69563	1.40798e-14	4.97486e-13	CSF1R	protein_coding
ENSG00000113721.14	918.613	-2.521	0.254535	-9.90433	3.9864e-23	3.12005e-21	PDGFRB	protein_coding
ENSG00000183876.9	399.244	-1.77441	0.315271	-5.62821	1.82087e-08	2.87032e-07	ARSI	protein_coding
ENSG00000070814.19	4646.76	-1.09005	0.277568	-3.92715	8.59574e-05	0.000617645	TCOF1	protein_coding
ENSG00000171992.13	154.437	1.74601	0.39309	4.44175	8.92319e-06	8.18283e-05	SYNPO	protein_coding
ENSG00000256235.2	424.357	-1.24704	0.312304	-3.99304	6.52312e-05	0.00048476	SMIM3	protein_coding
ENSG00000211445.12	3547.46	-1.23124	0.255177	-4.82504	1.39973e-06	1.51169e-05	GPX3	protein_coding
ENSG00000197043.14	2926.44	-1.87006	0.268982	-6.95236	3.5922e-12	9.45418e-11	ANXA6	protein_coding
ENSG00000198624.13	703.348	1.05958	0.253928	4.17276	3.00933e-05	0.000244709	CCDC69	protein_coding
ENSG00000196743.8	5940.83	3.28083	0.226316	14.4967	1.27168e-47	3.84705e-45	GM2A	protein_coding
ENSG00000086570.12	27.3268	8.57426	1.56014	5.49585	3.88841e-08	5.8599e-07	FAT2	protein_coding
ENSG00000145888.10	2.93772	4.95326	2.24458	2.20676	0.0273305	0.078107	GLRA1	protein_coding
ENSG00000155511.18	5.7663	6.01633	1.88245	3.19602	0.00139338	0.00689369	GRIA1	protein_coding
ENSG00000164574.16	2049.71	1.19618	0.215525	5.55006	2.85577e-08	4.38112e-07	GALNT10	protein_coding
ENSG00000170271.11	1366.21	3.488	0.217994	16.0005	1.26827e-57	6.4428e-55	FAXDC2	protein_coding
ENSG00000170624.13	4.04552	5.34233	2.03192	2.6292	0.00855848	0.0310592	SGCD	protein_coding
ENSG00000113249.12	97.7153	-2.57964	0.451633	-5.71181	1.11782e-08	1.82623e-07	HAVCR1	protein_coding
ENSG00000055163.20	2735.87	1.6424	0.22981	7.14679	8.88282e-13	2.51754e-11	CYFIP2	protein_coding
ENSG00000164330.17	4.72376	4.09734	1.94859	2.10272	0.0354904	0.0954978	EBF1	protein_coding
ENSG00000135083.15	508.485	-1.31826	0.261119	-5.04852	4.45255e-07	5.37821e-06	CCNJL	protein_coding
ENSG00000164611.13	1821.83	1.31841	0.291729	4.51929	6.20485e-06	5.87665e-05	PTTG1	protein_coding
ENSG00000118322.14	6.99039	3.41256	1.50136	2.27298	0.0230275	0.0681985	ATP10B	protein_coding
ENSG00000145864.12	5.56891	3.26379	1.59317	2.04861	0.0405001	0.10559	GABRB2	protein_coding
ENSG00000022355.17	2.79496	5.55075	2.3675	2.34456	0.0190497	0.0587023	GABRA1	protein_coding
ENSG00000072571.20	1396.73	1.48919	0.302805	4.91799	8.74352e-07	9.85807e-06	HMMR	protein_coding
ENSG00000038274.17	1525.8	1.13527	0.224552	5.05571	4.2879e-07	5.19799e-06	MAT2B	protein_coding
ENSG00000145934.16	17.0422	7.5149	1.61358	4.65729	3.204e-06	3.2333e-05	TENM2	protein_coding
ENSG00000113645.14	1152.15	-1.00105	0.249862	-4.00639	6.1655e-05	0.000460599	WWC1	protein_coding
ENSG00000184347.14	10.1209	3.68655	1.37221	2.68658	0.00721869	0.0270389	SLIT3	protein_coding
ENSG00000134516.16	19.2501	4.80376	1.06207	4.52304	6.09578e-06	5.78643e-05	DOCK2	protein_coding
ENSG00000094755.17	2.93522	5.42411	2.25917	2.40093	0.0163534	0.051922	GABRP	protein_coding
ENSG00000204764.14	13.6109	3.56033	1.10322	3.22722	0.00125001	0.00629186	RANBP17	protein_coding
ENSG00000174705.13	667.275	-1.16856	0.266471	-4.38533	1.15808e-05	0.00010376	SH3PXD2B	protein_coding
ENSG00000214357.8	258.546	2.55177	0.30711	8.30897	9.65325e-17	4.42767e-15	NEURL1B	protein_coding
ENSG00000164463.12	702.99	1.78712	0.284815	6.27467	3.50371e-10	7.24531e-09	CREBRF	protein_coding
ENSG00000183072.10	112.935	1.07138	0.410984	2.60687	0.00913751	0.032737	NKX2-5	protein_coding
ENSG00000113739.10	3401.37	-2.03421	0.207457	-9.80545	1.0667e-22	8.11293e-21	STC2	protein_coding
ENSG00000113742.13	2877.95	2.20862	0.200947	10.991	4.22123e-28	4.83627e-26	CPEB4	protein_coding
ENSG00000170091.11	6.12285	4.0969	1.87747	2.18214	0.029099	0.0819032	NSG2	protein_coding
ENSG00000145920.15	7633.09	-2.48533	0.318612	-7.80048	6.16737e-15	2.27466e-13	CPLX2	protein_coding
ENSG00000048162.20	1130.25	-1.46524	0.256448	-5.71357	1.10627e-08	1.80846e-07	NOP16	protein_coding
ENSG00000175416.13	887.623	1.05687	0.270055	3.91353	9.09569e-05	0.000648206	CLTB	protein_coding
ENSG00000074276.10	537.681	-1.15366	0.359506	-3.20901	0.00133191	0.00664695	CDHR2	protein_coding
ENSG00000169258.7	170.797	-1.27255	0.320153	-3.97481	7.04357e-05	0.000517297	GPRIN1	protein_coding
ENSG00000160867.15	8165.14	-2.48746	0.283035	-8.78855	1.515e-18	8.2906e-17	FGFR4	protein_coding
ENSG00000165671.20	38.852	2.90315	0.711772	4.07876	4.52757e-05	0.000350288	NSD1	protein_coding
ENSG00000169230.10	4917.62	-1.36446	0.295351	-4.61979	3.84138e-06	3.78708e-05	PRELID1	protein_coding
ENSG00000131183.11	12.6251	-3.90731	1.14127	-3.42366	0.000617829	0.00343971	SLC34A1	protein_coding
ENSG00000198055.11	1015.32	-1.24919	0.300053	-4.16324	3.13757e-05	0.000254063	GRK6	protein_coding
ENSG00000113758.13	2423.26	-1.18629	0.310662	-3.81858	0.00013422	0.000913948	DBN1	protein_coding
ENSG00000170074.19	2.76749	4.93586	2.24579	2.19783	0.027961	0.0794368	FAM153A	protein_coding
ENSG00000145911.6	25.7322	2.43191	0.699965	3.47433	0.000512129	0.00292626	N4BP3	protein_coding
ENSG00000145912.8	1750.52	-1.54021	0.288657	-5.33578	9.51327e-08	1.31892e-06	NHP2	protein_coding
ENSG00000050767.17	3.74962	6.07743	2.07204	2.93306	0.00335634	0.0143347	COL23A1	protein_coding
ENSG00000177932.6	2.35073	5.26826	2.27132	2.31947	0.0203694	0.0618292	ZNF354C	protein_coding
ENSG00000087116.16	381.059	1.25874	0.27628	4.55604	5.21268e-06	4.99452e-05	ADAMTS2	protein_coding
ENSG00000204661.9	4.94947	3.93254	1.58556	2.48022	0.0131301	0.0436652	C5orf60	protein_coding
ENSG00000197226.12	2957.16	-1.24851	0.268827	-4.6443	3.41236e-06	3.41795e-05	TBC1D9B	protein_coding
ENSG00000113300.12	2625.87	1.20849	0.246146	4.90965	9.1239e-07	1.02398e-05	CNOT6	protein_coding
ENSG00000161055.4	9.80896	3.54528	1.18584	2.98969	0.00279263	0.012322	SCGB3A1	protein_coding
ENSG00000165810.17	6.19171	4.44608	1.81868	2.44468	0.0144981	0.0472347	BTNL9	protein_coding
ENSG00000164379.7	5727.78	-1.05391	0.194066	-5.43067	5.61444e-08	8.14018e-07	FOXQ1	protein_coding
ENSG00000112699.11	2498.73	-1.4028	0.20749	-6.7608	1.37229e-11	3.39278e-10	GMDS	protein_coding
ENSG00000124535.15	2547.76	-1.01464	0.222853	-4.55296	5.28957e-06	5.0664e-05	WRNIP1	protein_coding
ENSG00000021355.13	1726.5	1.05697	0.215817	4.89756	9.70365e-07	1.08407e-05	SERPINB1	protein_coding
ENSG00000170542.6	1708.42	2.32073	0.256369	9.05228	1.40013e-19	8.32168e-18	SERPINB9	protein_coding
ENSG00000137274.13	627.004	1.14129	0.222376	5.13225	2.863e-07	3.59698e-06	BPHL	protein_coding
ENSG00000137285.10	748.517	-1.05886	0.312343	-3.39006	0.000698768	0.00383248	TUBB2B	protein_coding
ENSG00000168994.13	1536.12	-1.06008	0.277605	-3.81867	0.000134174	0.000913864	PXDC1	protein_coding
ENSG00000145975.14	4.82713	5.74564	1.99189	2.88452	0.00392007	0.0163431	FAM217A	protein_coding
ENSG00000124787.13	841.951	-1.67169	0.248612	-6.72412	1.76662e-11	4.31619e-10	RPP40	protein_coding
ENSG00000214113.10	1785.32	-1.15218	0.229236	-5.02617	5.00362e-07	5.94676e-06	LYRM4	protein_coding
ENSG00000124491.15	8.06281	4.58251	1.7732	2.58431	0.00975732	0.0345484	F13A1	protein_coding
ENSG00000124782.20	7315.17	-1.41381	0.232024	-6.09339	1.10544e-09	2.14122e-08	RREB1	protein_coding
ENSG00000164304.16	16.6748	1.80631	0.846279	2.13442	0.0328085	0.0897726	CAGE1	protein_coding
ENSG00000239264.8	296.074	-1.23159	0.315369	-3.90523	9.41353e-05	0.000668557	TXNDC5	protein_coding
ENSG00000111846.17	1220.2	-2.4268	0.216409	-11.214	3.48239e-29	4.34073e-27	GCNT2	protein_coding
ENSG00000137434.11	18.7966	1.9631	0.751158	2.61343	0.00896391	0.0322351	C6orf52	protein_coding
ENSG00000111837.11	46.9501	4.18937	0.626077	6.69147	2.20946e-11	5.32565e-10	MAK	protein_coding
ENSG00000153157.13	8.21584	3.12047	1.22955	2.53789	0.0111522	0.0384508	SYCP2L	protein_coding
ENSG00000197977.4	4544.64	-1.33478	0.239507	-5.57303	2.50343e-08	3.87816e-07	ELOVL2	protein_coding
ENSG00000244476.3	6.01257	4.34401	1.90583	2.27933	0.0226474	0.0673231	ERVFRD-1	protein_coding
ENSG00000111859.17	11237.6	-1.27037	0.216938	-5.85593	4.74348e-09	8.2609e-08	NEDD9	protein_coding
ENSG00000111863.12	4.05144	4.95288	2.05517	2.40996	0.0159544	0.0509106	ADTRP	protein_coding
ENSG00000112137.17	29.3633	3.31621	0.756125	4.3858	1.15562e-05	0.000103575	PHACTR1	protein_coding
ENSG00000145990.11	1159.11	-1.27596	0.217937	-5.85471	4.77835e-09	8.31068e-08	GFOD1	protein_coding
ENSG00000180537.13	5.06843	5.36804	1.95668	2.74344	0.00607985	0.0234788	RNF182	protein_coding
ENSG00000137198.9	2.16812	4.71098	2.40059	1.96242	0.0497132	0.123442	GMPR	protein_coding
ENSG00000137177.20	2488.01	-1.0392	0.196025	-5.30135	1.14952e-07	1.56232e-06	KIF13A	protein_coding
ENSG00000137364.5	987.042	-1.02915	0.242584	-4.24245	2.21095e-05	0.000184811	TPMT	protein_coding
ENSG00000137393.9	633.237	2.28236	0.256878	8.88497	6.39361e-19	3.59377e-17	RNF144B	protein_coding
ENSG00000152954.12	7.8424	3.74936	1.43615	2.6107	0.00903567	0.0324455	NRSN1	protein_coding
ENSG00000146038.12	11822.5	-1.11803	0.211591	-5.28393	1.26444e-07	1.70389e-06	DCDC2	protein_coding
ENSG00000146049.1	21.4126	-1.88418	0.742694	-2.53695	0.0111824	0.038535	KAAG1	protein_coding
ENSG00000112293.15	546.872	-1.07108	0.233461	-4.58783	4.47878e-06	4.35331e-05	GPLD1	protein_coding
ENSG00000112294.12	2326.02	-1.04521	0.20981	-4.98168	6.30344e-07	7.34692e-06	ALDH5A1	protein_coding
ENSG00000137261.14	12.4375	2.14008	1.05814	2.02249	0.0431255	0.110632	KIAA0319	protein_coding
ENSG00000112308.13	4209.59	1.19611	0.255189	4.68715	2.77031e-06	2.83515e-05	C6orf62	protein_coding
ENSG00000111913.18	24.8864	8.58834	1.58263	5.42664	5.74258e-08	8.31702e-07	RIPOR2	protein_coding
ENSG00000079691.18	324.802	3.17597	0.31345	10.1323	3.97137e-24	3.4716e-22	CARMIL1	protein_coding
ENSG00000079689.14	401.194	-3.22973	0.407931	-7.91733	2.4266e-15	9.55171e-14	SCGN	protein_coding
ENSG00000146039.10	13.2488	3.55382	1.38461	2.56666	0.0102684	0.0359795	SLC17A4	protein_coding
ENSG00000112337.10	216.838	-2.54744	0.415431	-6.13203	8.67659e-10	1.69897e-08	SLC17A2	protein_coding
ENSG00000112343.11	1344.6	2.60205	0.223493	11.6426	2.50194e-31	3.60226e-29	TRIM38	protein_coding
ENSG00000278637.1	299.253	-1.23941	0.39443	-3.14228	0.00167636	0.00806548	HIST1H4A	protein_coding
ENSG00000278705.1	9178.26	-2.05296	0.330247	-6.21642	5.08622e-10	1.02578e-08	HIST1H4B	protein_coding
ENSG00000274267.1	17339.9	-2.86944	0.334451	-8.57958	9.52241e-18	4.90213e-16	HIST1H3B	protein_coding
ENSG00000278463.1	4302.85	-4.46176	0.335644	-13.2931	2.53793e-40	5.79078e-38	HIST1H2AB	protein_coding
ENSG00000276410.3	2933.02	-4.03795	0.276009	-14.6298	1.81409e-48	5.8146e-46	HIST1H2BB	protein_coding
ENSG00000278272.1	13206.5	-2.44557	0.343345	-7.12277	1.05777e-12	2.97206e-11	HIST1H3C	protein_coding
ENSG00000187837.3	29019.9	-1.40839	0.305971	-4.60302	4.16414e-06	4.07248e-05	HIST1H1C	protein_coding
ENSG00000197061.4	14811.4	-2.47273	0.315034	-7.84908	4.19095e-15	1.5915e-13	HIST1H4C	protein_coding
ENSG00000180596.7	13037.6	-2.78847	0.299002	-9.32594	1.10009e-20	7.25949e-19	HIST1H2BC	protein_coding
ENSG00000180573.9	8157.38	-1.90651	0.320139	-5.95526	2.59651e-09	4.72673e-08	HIST1H2AC	protein_coding
ENSG00000168298.6	17699.3	-1.84453	0.314707	-5.86112	4.59761e-09	8.03805e-08	HIST1H1E	protein_coding
ENSG00000158373.8	9466.43	-2.11216	0.294279	-7.17741	7.10431e-13	2.05657e-11	HIST1H2BD	protein_coding
ENSG00000274290.2	30.591	2.17366	0.68495	3.17346	0.00150635	0.00737215	HIST1H2BE	protein_coding
ENSG00000277157.1	7873.76	-2.94787	0.331733	-8.88627	6.31946e-19	3.55952e-17	HIST1H4D	protein_coding
ENSG00000277224.2	4101.01	-3.09394	0.309845	-9.98543	1.76534e-23	1.42733e-21	HIST1H2BF	protein_coding
ENSG00000276966.2	14623	-1.70935	0.332851	-5.13547	2.8144e-07	3.53923e-06	HIST1H4E	protein_coding
ENSG00000273802.2	6251.87	-1.81785	0.292401	-6.21698	5.06825e-10	1.02292e-08	HIST1H2BG	protein_coding
ENSG00000277075.2	8518.45	-2.33346	0.321225	-7.26425	3.75112e-13	1.13155e-11	HIST1H2AE	protein_coding
ENSG00000277775.1	679.672	-1.73712	0.349396	-4.97177	6.63445e-07	7.68284e-06	HIST1H3F	protein_coding
ENSG00000275713.2	603.933	-2.4115	0.324546	-7.43036	1.08301e-13	3.49166e-12	HIST1H2BH	protein_coding
ENSG00000278588.1	272.137	1.0533	0.399221	2.63838	0.00833038	0.0304242	HIST1H2BI	protein_coding
ENSG00000158406.4	2474.04	-2.81348	0.337934	-8.32555	8.39396e-17	3.88314e-15	HIST1H4H	protein_coding
ENSG00000186470.14	612.778	-1.16605	0.242532	-4.80781	1.52595e-06	1.63164e-05	BTN3A2	protein_coding
ENSG00000124557.12	3.64243	5.3507	2.1678	2.46826	0.013577	0.044836	BTN1A1	protein_coding
ENSG00000124635.8	3017.55	-1.30515	0.294388	-4.43343	9.27471e-06	8.4677e-05	HIST1H2BJ	protein_coding
ENSG00000196787.3	6787.28	-1.54719	0.337216	-4.58812	4.47257e-06	4.34884e-05	HIST1H2AG	protein_coding
ENSG00000276180.1	11.3718	3.18524	1.00649	3.1647	0.00155242	0.00756516	HIST1H4I	protein_coding
ENSG00000197903.7	645.49	-1.12321	0.297495	-3.77558	0.000159638	0.00106389	HIST1H2BK	protein_coding
ENSG00000274997.1	567.182	-2.81685	0.328285	-8.58051	9.44542e-18	4.87908e-16	HIST1H2AH	protein_coding
ENSG00000096654.15	275.427	-1.28751	0.380817	-3.38092	0.000722436	0.00394061	ZNF184	protein_coding
ENSG00000185130.5	2976.23	-3.36169	0.322376	-10.4278	1.85059e-25	1.8251e-23	HIST1H2BL	protein_coding
ENSG00000196747.4	8372.54	-2.47852	0.347266	-7.13724	9.52236e-13	2.69024e-11	HIST1H2AI	protein_coding
ENSG00000278828.1	7627.13	-2.26862	0.337536	-6.72114	1.80314e-11	4.40142e-10	HIST1H3H	protein_coding
ENSG00000276368.1	6003.98	-3.2467	0.596995	-5.4384	5.37597e-08	7.84088e-07	HIST1H2AJ	protein_coding
ENSG00000273703.1	1401.35	-4.23001	0.345759	-12.234	2.0466e-34	3.67351e-32	HIST1H2BM	protein_coding
ENSG00000197238.4	338.802	-1.64265	0.352221	-4.6637	3.1057e-06	3.13881e-05	HIST1H4J	protein_coding
ENSG00000273542.1	768.27	-1.7106	0.328022	-5.21489	1.83924e-07	2.39457e-06	HIST1H4K	protein_coding
ENSG00000233822.4	4269.13	-1.60789	0.31831	-5.05135	4.38691e-07	5.31084e-06	HIST1H2BN	protein_coding
ENSG00000275221.1	727.246	-1.87203	0.36337	-5.15187	2.57906e-07	3.26463e-06	HIST1H2AK	protein_coding
ENSG00000276903.1	482.896	-2.32834	0.384798	-6.05083	1.44103e-09	2.73034e-08	HIST1H2AL	protein_coding
ENSG00000184357.4	2643.97	-3.06668	0.335292	-9.1463	5.89179e-20	3.63832e-18	HIST1H1B	protein_coding
ENSG00000197153.4	42.9716	-2.95415	0.663178	-4.45453	8.40772e-06	7.75238e-05	HIST1H3J	protein_coding
ENSG00000274641.1	5217.92	-2.13252	0.309309	-6.89449	5.40588e-12	1.3995e-10	HIST1H2BO	protein_coding
ENSG00000124657.1	10.2133	3.29312	1.23244	2.67203	0.00753949	0.0279952	OR2B6	protein_coding
ENSG00000197279.4	146.156	2.01035	0.376234	5.34336	9.12406e-08	1.26954e-06	ZNF165	protein_coding
ENSG00000196812.5	309.418	1.0303	0.281056	3.66581	0.000246553	0.00155863	ZSCAN16	protein_coding
ENSG00000204701.2	115.797	-1.96758	0.473143	-4.15854	3.20292e-05	0.000258732	OR2J3	protein_coding
ENSG00000204700.5	64.7052	-1.77938	0.60001	-2.96559	0.00302108	0.013132	OR2J2	protein_coding
ENSG00000204695.4	29.8138	-2.12162	0.945234	-2.24454	0.0247976	0.0723954	OR14J1	protein_coding
ENSG00000204688.9	7.49411	4.98151	1.83222	2.71884	0.00655105	0.0249937	OR2H1	protein_coding
ENSG00000204618.8	88.0211	4.71624	0.476	9.90807	3.8398e-23	3.01408e-21	RNF39	protein_coding
ENSG00000204616.11	14.6179	2.96545	1.34723	2.20114	0.0277259	0.0788936	TRIM31	protein_coding
ENSG00000137404.14	586.673	-1.43292	0.311203	-4.60446	4.13541e-06	4.05173e-05	NRM	protein_coding
ENSG00000196230.13	57035	-1.83179	0.25837	-7.08978	1.34324e-12	3.74382e-11	TUBB	protein_coding
ENSG00000204580.13	2850.53	1.42491	0.282296	5.04757	4.47475e-07	5.4026e-06	DDR1	protein_coding
ENSG00000137411.17	2999.5	-1.57593	0.266507	-5.9133	3.35328e-09	6.0069e-08	VARS2	protein_coding
ENSG00000137310.12	570.652	-1.35776	0.261357	-5.19506	2.04657e-07	2.64404e-06	TCF19	protein_coding
ENSG00000234745.11	1632.76	1.46938	0.233772	6.28553	3.26741e-10	6.78795e-09	HLA-B	protein_coding
ENSG00000213722.9	676.295	-2.08938	0.28864	-7.23871	4.52957e-13	1.34163e-11	DDAH2	protein_coding
ENSG00000204396.10	146.408	1.50876	0.350075	4.30983	1.63381e-05	0.000141261	VWA7	protein_coding
ENSG00000204394.13	6209.57	-1.3275	0.283672	-4.6797	2.87294e-06	2.92885e-05	VARS	protein_coding
ENSG00000204371.11	2912.88	-1.45367	0.266915	-5.44621	5.14552e-08	7.56211e-07	EHMT2	protein_coding
ENSG00000166278.15	979.71	-1.19708	0.272139	-4.39878	1.08862e-05	9.79939e-05	C2	protein_coding
ENSG00000204366.3	328.252	-2.7258	0.325402	-8.3767	5.44313e-17	2.55749e-15	ZBTB12	protein_coding
ENSG00000243649.8	243.043	-1.13724	0.311333	-3.6528	0.000259401	0.00162867	CFB	protein_coding
ENSG00000168477.19	115.883	2.13235	0.386868	5.51184	3.55107e-08	5.38642e-07	TNXB	protein_coding
ENSG00000213654.10	100.719	-1.02959	0.402303	-2.55923	0.0104904	0.036586	GPSM3	protein_coding
ENSG00000204301.6	99.7002	1.58791	0.474532	3.34627	0.000819062	0.00439817	NOTCH4	protein_coding
ENSG00000204296.11	6.08599	6.01361	1.92786	3.11931	0.00181275	0.00860818	TSBP1	protein_coding
ENSG00000168394.11	2132.18	2.30234	0.257919	8.92658	4.3937e-19	2.50627e-17	TAP1	protein_coding
ENSG00000204252.14	165.229	7.9589	0.720659	11.0439	2.34587e-28	2.75809e-26	HLA-DOA	protein_coding
ENSG00000204209.13	1976.61	-1.164	0.252375	-4.61219	3.98443e-06	3.91379e-05	DAXX	protein_coding
ENSG00000030110.13	1132.49	1.36605	0.274361	4.97903	6.39048e-07	7.42907e-06	BAK1	protein_coding
ENSG00000161896.12	423.409	7.5522	0.445745	16.9429	2.17224e-64	1.82767e-61	IP6K3	protein_coding
ENSG00000137309.19	13941.5	-1.19433	0.268453	-4.44895	8.62909e-06	7.94018e-05	HMGA1	protein_coding
ENSG00000186577.14	283.535	1.01942	0.308523	3.30421	0.00095245	0.00498987	SMIM29	protein_coding
ENSG00000272325.2	1930.01	-1.08152	0.205934	-5.25175	1.50659e-07	2.00116e-06	NUDT3	protein_coding
ENSG00000124507.11	4.41779	3.95593	1.95015	2.02852	0.0425068	0.109394	PACSIN1	protein_coding
ENSG00000196821.10	6147.11	-1.03552	0.222521	-4.65359	3.26213e-06	3.28212e-05	C6orf106	protein_coding
ENSG00000065060.17	4348.3	-1.14004	0.19309	-5.90417	3.54426e-09	6.3154e-08	UHRF1BP1	protein_coding
ENSG00000124678.18	3.68074	4.90164	2.13751	2.29315	0.0218391	0.0653692	TCP11	protein_coding
ENSG00000146197.9	19.9577	6.44083	1.58615	4.06068	4.89309e-05	0.000375225	SCUBE3	protein_coding
ENSG00000065029.15	567.21	1.2587	0.27678	4.54767	5.42418e-06	5.18795e-05	ZNF76	protein_coding
ENSG00000112041.13	15.0386	2.45255	0.901818	2.71956	0.00653695	0.0249541	TULP1	protein_coding
ENSG00000096060.14	2579.58	-1.22849	0.208946	-5.87944	4.11653e-09	7.24876e-08	FKBP5	protein_coding
ENSG00000197753.10	25.1627	3.55768	1.04962	3.38949	0.000700223	0.00383811	LHFPL5	protein_coding
ENSG00000156711.17	1976.99	1.32969	0.253072	5.25422	1.48653e-07	1.9765e-06	MAPK13	protein_coding
ENSG00000180316.12	6.73406	4.49495	1.78039	2.5247	0.0115798	0.039646	PNPLA1	protein_coding
ENSG00000010030.14	21.5678	5.21303	0.956445	5.45043	5.02493e-08	7.39701e-07	ETV7	protein_coding
ENSG00000179165.11	26.265	2.54967	0.673836	3.78382	0.000154441	0.00103488	PXT1	protein_coding
ENSG00000112078.14	3710.52	-1.21127	0.208872	-5.79911	6.66684e-09	1.13177e-07	KCTD20	protein_coding
ENSG00000124762.13	9664.51	2.95181	0.249949	11.8096	3.48045e-32	5.41662e-30	CDKN1A	protein_coding
ENSG00000124772.12	7.17574	3.81859	1.50826	2.53178	0.0113486	0.0389783	CPNE5	protein_coding
ENSG00000137193.14	1978.82	-1.91194	0.250705	-7.62624	2.41697e-14	8.3429e-13	PIM1	protein_coding
ENSG00000112139.16	13.7293	5.44794	1.67448	3.25352	0.00113984	0.0058101	MDGA1	protein_coding
ENSG00000124721.17	36.9489	7.10689	1.5349	4.6302	3.65315e-06	3.62274e-05	DNAH8	protein_coding
ENSG00000146122.17	9.21655	3.7683	1.42404	2.6462	0.00814019	0.029847	DAAM2	protein_coding
ENSG00000001167.14	1831.57	-1.11036	0.221748	-5.0073	5.51997e-07	6.5013e-06	NFYA	protein_coding
ENSG00000095970.16	1513.94	9.78602	0.474799	20.6109	2.19255e-94	4.54094e-91	TREM2	protein_coding
ENSG00000112559.14	216.384	5.19965	0.415491	12.5145	6.22253e-36	1.16344e-33	MDFI	protein_coding
ENSG00000112576.12	521.778	1.0727	0.295312	3.63243	0.000280763	0.00174458	CCND3	protein_coding
ENSG00000124496.12	62.0714	4.94735	0.620907	7.96795	1.61334e-15	6.39729e-14	TRERF1	protein_coding
ENSG00000221821.4	204.438	1.32477	0.332429	3.98513	6.74438e-05	0.000498451	C6orf226	protein_coding
ENSG00000124713.6	48.1671	1.79833	0.514515	3.4952	0.00047371	0.00273577	GNMT	protein_coding
ENSG00000112640.15	5350.62	1.79418	0.24185	7.41855	1.18409e-13	3.79982e-12	PPP2R5D	protein_coding
ENSG00000112658.8	2757.27	-1.04958	0.269018	-3.90153	9.55857e-05	0.000677607	SRF	protein_coding
ENSG00000137204.14	23.6028	-1.5944	0.775323	-2.05644	0.0397405	0.104121	SLC22A7	protein_coding
ENSG00000146215.13	58.1351	-2.05962	0.561019	-3.67121	0.000241404	0.00152967	CRIP3	protein_coding
ENSG00000171462.15	140.161	1.32003	0.373805	3.53132	0.000413493	0.00243182	DLK2	protein_coding
ENSG00000204052.4	31.8968	2.25613	0.610603	3.69493	0.000219949	0.00140863	LRRC73	protein_coding
ENSG00000170734.11	2204.07	2.26712	0.22148	10.2363	1.36418e-24	1.24085e-22	POLH	protein_coding
ENSG00000172432.19	1404.18	-1.04369	0.290625	-3.59118	0.000329186	0.00200068	GTPBP2	protein_coding
ENSG00000112715.21	4494.03	-1.528	0.238724	-6.40068	1.54684e-10	3.3238e-09	VEGFA	protein_coding
ENSG00000181577.16	6.62343	-2.72368	1.34185	-2.02979	0.0423775	0.109205	C6orf223	protein_coding
ENSG00000180992.7	2078.29	-1.15084	0.276225	-4.16633	3.09543e-05	0.000250877	MRPL14	protein_coding
ENSG00000137216.19	2916.36	1.10306	0.28088	3.92716	8.59553e-05	0.000617645	TMEM63B	protein_coding
ENSG00000262179.2	94.5754	8.46449	1.08444	7.80538	5.93217e-15	2.19694e-13	MYMX	protein_coding
ENSG00000124813.22	9.70864	5.12462	1.70716	3.00185	0.00268345	0.0119184	RUNX2	protein_coding
ENSG00000112782.17	10.7116	6.75297	1.71021	3.94862	7.86023e-05	0.000571044	CLIC5	protein_coding
ENSG00000172348.14	8.26231	4.51131	1.73958	2.59334	0.009505	0.0337883	RCAN2	protein_coding
ENSG00000146233.8	20.4218	7.17528	1.59533	4.49769	6.86968e-06	6.45357e-05	CYP39A1	protein_coding
ENSG00000153291.16	86.8214	4.95774	0.649752	7.6302	2.34388e-14	8.1114e-13	SLC25A27	protein_coding
ENSG00000180113.16	4.1213	3.9796	2.01177	1.97816	0.047911	0.11984	TDRD6	protein_coding
ENSG00000146070.16	2.74227	4.61557	2.32765	1.98293	0.0473755	0.118964	PLA2G7	protein_coding
ENSG00000112818.10	85.5669	4.22819	0.630784	6.70307	2.04087e-11	4.95476e-10	MEP1A	protein_coding
ENSG00000069122.19	9.96395	3.77502	1.23654	3.05289	0.0022665	0.0103728	ADGRF5	protein_coding
ENSG00000153292.16	8.10321	3.43947	1.44916	2.37342	0.0176244	0.0551255	ADGRF1	protein_coding
ENSG00000164393.8	4.34817	5.21857	2.05837	2.53529	0.0112353	0.0386785	ADGRF2	protein_coding
ENSG00000124818.15	4.69207	6.10353	1.9502	3.12969	0.00174989	0.00835355	OPN5	protein_coding
ENSG00000203972.10	5.00012	4.55133	1.90959	2.38341	0.0171532	0.0539525	GLYATL3	protein_coding
ENSG00000170927.14	41.5311	3.8442	0.737491	5.21254	1.86269e-07	2.42275e-06	PKHD1	protein_coding
ENSG00000112118.19	15886	-2.24901	0.224913	-9.99943	1.5328e-23	1.25438e-21	MCM3	protein_coding
ENSG00000096093.16	747.049	1.25064	0.278583	4.4893	7.14572e-06	6.69653e-05	EFHC1	protein_coding
ENSG00000096092.6	506.356	-1.17852	0.25499	-4.62184	3.80357e-06	3.75668e-05	TMEM14A	protein_coding
ENSG00000137270.11	13.4273	2.62497	1.07014	2.45292	0.0141703	0.0463459	GCM1	protein_coding
ENSG00000001084.12	3972.05	-1.10955	0.275086	-4.03347	5.49603e-05	0.000416011	GCLC	protein_coding
ENSG00000146147.15	9.93846	4.95499	1.70515	2.9059	0.00366199	0.015432	MLIP	protein_coding
ENSG00000168143.9	3.27987	5.17573	2.19674	2.35609	0.0184682	0.0571802	FAM83B	protein_coding
ENSG00000146151.13	2.52743	4.71082	2.35775	1.99802	0.0457149	0.115742	HMGCLL1	protein_coding
ENSG00000112175.8	3.26422	5.17564	2.14434	2.41362	0.0157948	0.0505119	BMP5	protein_coding
ENSG00000124749.17	22.141	4.33283	0.979258	4.42461	9.66177e-06	8.78532e-05	COL21A1	protein_coding
ENSG00000151914.20	17384.6	1.63782	0.277076	5.91109	3.39857e-09	6.08399e-08	DST	protein_coding
ENSG00000112208.11	2129.99	-1.52948	0.219227	-6.9767	3.02193e-12	8.05568e-11	BAG2	protein_coding
ENSG00000112232.9	2.21174	4.89387	2.42396	2.01896	0.0434917	0.111404	KHDRBS2	protein_coding
ENSG00000146166.16	24.8997	3.25359	0.847319	3.83987	0.000123102	0.000848755	LGSN	protein_coding
ENSG00000112245.11	320.929	-1.29501	0.258565	-5.00847	5.48642e-07	6.46744e-06	PTP4A1	protein_coding
ENSG00000188107.14	55.6757	5.98469	0.851314	7.02995	2.06606e-12	5.61318e-11	EYS	protein_coding
ENSG00000082293.13	19.5773	5.29338	1.21929	4.34137	1.41595e-05	0.000123937	COL19A1	protein_coding
ENSG00000112280.16	10.9399	6.71821	1.68694	3.98249	6.8198e-05	0.000503	COL9A1	protein_coding
ENSG00000154079.6	150.952	1.38749	0.324964	4.26967	1.95764e-05	0.000165851	SDHAF4	protein_coding
ENSG00000079841.18	9.39744	6.78554	1.73736	3.90567	9.39666e-05	0.000667535	RIMS1	protein_coding
ENSG00000164430.16	3.23136	4.34374	2.13733	2.03232	0.0421209	0.108717	CGAS	protein_coding
ENSG00000119899.13	850.009	-1.12772	0.236058	-4.7773	1.77662e-06	1.87566e-05	SLC17A5	protein_coding
ENSG00000156535.15	637.777	3.00954	0.249093	12.082	1.31495e-33	2.22665e-31	CD109	protein_coding
ENSG00000111799.21	24.2365	3.09327	0.771474	4.00956	6.08314e-05	0.000455331	COL12A1	protein_coding
ENSG00000118407.15	9.4452	5.58091	1.70617	3.27102	0.00107162	0.00550511	FILIP1	protein_coding
ENSG00000196586.14	2609.45	1.76233	0.232044	7.59482	3.08231e-14	1.0461e-12	MYO6	protein_coding
ENSG00000112706.12	3.71926	5.07646	2.11862	2.39612	0.0165697	0.052448	IMPG1	protein_coding
ENSG00000269964.3	4.1301	5.19739	2.1146	2.45786	0.0139766	0.045863	MEI4	protein_coding
ENSG00000198478.8	2400.34	-1.1235	0.230691	-4.87018	1.11498e-06	1.2273e-05	SH3BGRL2	protein_coding
ENSG00000118402.6	27.1323	2.39697	0.806055	2.9737	0.00294229	0.0128582	ELOVL4	protein_coding
ENSG00000112773.16	2260.79	1.56007	0.280599	5.55981	2.70074e-08	4.16465e-07	TENT5A	protein_coding
ENSG00000065833.9	4.35728	5.12234	2.08084	2.46167	0.0138291	0.0454844	ME1	protein_coding
ENSG00000065609.14	7.04792	4.79243	1.81448	2.64121	0.00826096	0.0302034	SNAP91	protein_coding
ENSG00000135318.12	986.074	-1.63758	0.330074	-4.96125	7.00397e-07	8.05876e-06	NT5E	protein_coding
ENSG00000203872.7	87.0302	1.12381	0.464592	2.41892	0.0155669	0.0499609	C6orf163	protein_coding
ENSG00000118432.12	17.6563	5.83377	1.63161	3.57546	0.000349611	0.00210436	CNR1	protein_coding
ENSG00000146278.10	3535.92	1.82463	0.212916	8.56969	1.03764e-17	5.33158e-16	PNRC1	protein_coding
ENSG00000146281.6	1946.51	-1.18199	0.212525	-5.56166	2.67228e-08	4.12312e-07	PM20D2	protein_coding
ENSG00000198833.7	2264.17	-1.49519	0.229736	-6.50831	7.60029e-11	1.71382e-09	UBE2J1	protein_coding
ENSG00000135299.17	26.9203	2.0468	0.669274	3.05824	0.00222642	0.0102171	ANKRD6	protein_coding
ENSG00000112159.12	10049.3	-1.18672	0.195666	-6.06504	1.31923e-09	2.50839e-08	MDN1	protein_coding
ENSG00000112182.15	17.2505	3.00619	0.932663	3.22323	0.00126753	0.00636461	BACH2	protein_coding
ENSG00000172469.16	959.626	-1.10663	0.297893	-3.71487	0.000203307	0.00131995	MANEA	protein_coding
ENSG00000172461.11	4.08312	4.96943	2.06288	2.40897	0.0159975	0.0510327	FUT9	protein_coding
ENSG00000184486.9	10.2342	3.65846	1.19851	3.05251	0.00226933	0.010384	POU3F2	protein_coding
ENSG00000112246.9	3.6547	5.36841	2.13845	2.51042	0.0120587	0.0409261	SIM1	protein_coding
ENSG00000164418.20	7.81992	4.05722	1.46286	2.77348	0.00554602	0.0217796	GRIK2	protein_coding
ENSG00000187772.8	2794.57	-2.17228	0.245954	-8.83205	1.02774e-18	5.6819e-17	LIN28B	protein_coding
ENSG00000112276.14	205.389	1.03486	0.296079	3.49521	0.000473683	0.00273577	BVES	protein_coding
ENSG00000057657.17	11.4696	7.22149	1.73287	4.16736	3.08149e-05	0.000250048	PRDM1	protein_coding
ENSG00000272398.6	6674.71	-1.10383	0.232337	-4.75098	2.02431e-06	2.11414e-05	CD24	protein_coding
ENSG00000130349.10	207.374	1.22109	0.358347	3.40757	0.00065545	0.00362517	C6orf203	protein_coding
ENSG00000178409.13	920.267	-2.13761	0.223495	-9.56445	1.128e-21	7.95036e-20	BEND3	protein_coding
ENSG00000112320.12	1878.73	-1.84816	0.216396	-8.54064	1.33481e-17	6.73005e-16	SOBP	protein_coding
ENSG00000146285.14	6.03897	3.01242	1.52547	1.97475	0.048296	0.120568	SCML4	protein_coding
ENSG00000081087.15	1237.83	1.26114	0.243734	5.17424	2.28838e-07	2.92002e-06	OSTM1	protein_coding
ENSG00000112333.11	2.57922	5.12546	2.36908	2.16348	0.0305043	0.0849062	NR2E1	protein_coding
ENSG00000080546.13	1896	2.41585	0.242283	9.9712	2.0376e-23	1.63762e-21	SESN1	protein_coding
ENSG00000135587.9	206.063	-1.07205	0.361461	-2.96589	0.00301813	0.0131276	SMPD2	protein_coding
ENSG00000004809.14	8.30283	6.94907	1.76619	3.93449	8.33729e-05	0.00060116	SLC22A16	protein_coding
ENSG00000112394.17	1325.29	1.12308	0.266794	4.20956	2.55866e-05	0.000210864	SLC16A10	protein_coding
ENSG00000074935.14	541.431	-1.34471	0.259207	-5.1878	2.12792e-07	2.74125e-06	TUBE1	protein_coding
ENSG00000112769.19	17.2294	4.82707	1.24924	3.864	0.000111547	0.000776246	LAMA4	protein_coding
ENSG00000123500.10	36.6122	5.78899	1.14607	5.05117	4.39119e-07	5.31363e-06	COL10A1	protein_coding
ENSG00000164451.13	3.06516	4.93592	2.21852	2.22488	0.0260896	0.0753445	CALHM4	protein_coding
ENSG00000183807.8	2.83902	4.99449	2.2735	2.19683	0.0280324	0.0795725	FAM162B	protein_coding
ENSG00000185002.10	8.38998	4.88853	1.8013	2.71388	0.00664996	0.0252958	RFX6	protein_coding
ENSG00000047936.10	20.1321	5.27558	1.21177	4.35362	1.33908e-05	0.000118053	ROS1	protein_coding
ENSG00000196376.11	14.365	4.42393	1.28796	3.43482	0.00059294	0.0033183	SLC35F1	protein_coding
ENSG00000111860.14	558.188	2.83491	0.272964	10.3857	2.88193e-25	2.78111e-23	CEP85L	protein_coding
ENSG00000111879.19	702.64	1.08251	0.247655	4.37103	1.23663e-05	0.000109921	FAM184A	protein_coding
ENSG00000172594.13	177.32	1.24253	0.378606	3.28186	0.00103123	0.0053353	SMPDL3A	protein_coding
ENSG00000186439.13	9.78197	6.51211	1.73451	3.75443	0.000173736	0.00114593	TRDN	protein_coding
ENSG00000188580.14	12.2426	3.43905	1.21677	2.82637	0.00470787	0.0190265	NKAIN2	protein_coding
ENSG00000146373.16	305.612	-1.29934	0.280122	-4.63847	3.50999e-06	3.50271e-05	RNF217	protein_coding
ENSG00000111907.21	15.9406	1.93432	0.907475	2.13154	0.0330444	0.0902432	TPD52L1	protein_coding
ENSG00000111912.20	907.275	-2.10324	0.270026	-7.78903	6.7527e-15	2.48035e-13	NCOA7	protein_coding
ENSG00000203760.8	1182.34	1.33387	0.215098	6.20124	5.60205e-10	1.12058e-08	CENPW	protein_coding
ENSG00000146374.14	4.73655	4.88579	2.0478	2.38588	0.0170384	0.0536414	RSPO3	protein_coding
ENSG00000172673.10	12.7509	5.22247	1.66852	3.13	0.00174805	0.00834626	THEMIS	protein_coding
ENSG00000152894.14	9041.04	-1.57836	0.212562	-7.42541	1.12435e-13	3.61672e-12	PTPRK	protein_coding
ENSG00000196569.12	78.244	4.7128	0.620795	7.59156	3.16082e-14	1.06912e-12	LAMA2	protein_coding
ENSG00000146376.11	8627.96	-1.30419	0.229301	-5.6877	1.28765e-08	2.08471e-07	ARHGAP18	protein_coding
ENSG00000164484.11	103.979	-2.20984	0.365305	-6.0493	1.45475e-09	2.74862e-08	TMEM200A	protein_coding
ENSG00000256162.2	1607.58	-1.07259	0.281298	-3.81299	0.000137295	0.000932059	SMLR1	protein_coding
ENSG00000118520.14	27.5154	-2.18577	0.676913	-3.22903	0.00124212	0.00626154	ARG1	protein_coding
ENSG00000154269.15	988.291	-1.44828	0.273585	-5.29373	1.19845e-07	1.61983e-06	ENPP3	protein_coding
ENSG00000197594.13	6080.46	-1.18921	0.292374	-4.06744	4.75333e-05	0.000365469	ENPP1	protein_coding
ENSG00000079931.15	4.19467	4.54777	2.04341	2.22558	0.0260427	0.0752573	MOXD1	protein_coding
ENSG00000112299.8	11.7707	2.52329	0.966104	2.61182	0.00900605	0.0323564	VNN1	protein_coding
ENSG00000146409.12	518.453	-1.38441	0.275767	-5.02021	5.16159e-07	6.1128e-06	SLC18B1	protein_coding
ENSG00000112319.19	10.2144	5.29435	1.69987	3.11456	0.00184221	0.00872928	EYA4	protein_coding
ENSG00000146411.5	4.58101	3.29334	1.58485	2.07801	0.0377089	0.100098	SLC2A12	protein_coding
ENSG00000135541.21	718.678	-1.49317	0.317468	-4.70337	2.55899e-06	2.63776e-05	AHI1	protein_coding
ENSG00000171408.14	6.07988	5.74584	1.88676	3.04535	0.00232407	0.0105949	PDE7B	protein_coding
ENSG00000135525.18	26.1028	3.54634	0.807687	4.39073	1.1297e-05	0.000101454	MAP7	protein_coding
ENSG00000197442.10	15.1898	4.11429	1.28448	3.20309	0.00135963	0.00676149	MAP3K5	protein_coding
ENSG00000016402.13	2.90614	4.50418	2.27208	1.9824	0.047434	0.119067	IL20RA	protein_coding
ENSG00000112378.12	8435.02	1.81538	0.196218	9.25186	2.20628e-20	1.41771e-18	PERP	protein_coding
ENSG00000135540.11	7791.44	-2.18628	0.253185	-8.63511	5.86689e-18	3.08516e-16	NHSL1	protein_coding
ENSG00000024862.17	387.829	1.09674	0.266698	4.1123	3.91733e-05	0.000307942	CCDC28A	protein_coding
ENSG00000203734.11	14.9958	4.07101	1.02293	3.97975	6.89867e-05	0.000508041	ECT2L	protein_coding
ENSG00000112406.5	180.067	2.38131	0.346955	6.86346	6.72112e-12	1.72342e-10	HECA	protein_coding
ENSG00000164440.15	3.42032	4.8549	2.16914	2.23817	0.02521	0.0734106	TXLNB	protein_coding
ENSG00000135577.4	3.81531	4.67039	2.03097	2.29959	0.0214715	0.064475	NMBR	protein_coding
ENSG00000118495.19	89.6147	2.73377	0.474968	5.75569	8.62907e-09	1.44125e-07	PLAGL1	protein_coding
ENSG00000152822.14	13.3669	2.73012	0.965365	2.82807	0.00468295	0.0189372	GRM1	protein_coding
ENSG00000118508.5	546.715	-1.49833	0.237978	-6.2961	3.05235e-10	6.3608e-09	RAB32	protein_coding
ENSG00000118492.17	6.03599	5.82332	1.91615	3.03907	0.00237311	0.0107674	ADGB	protein_coding
ENSG00000203727.4	35.0662	2.14467	0.688655	3.11428	0.00184394	0.00873438	SAMD5	protein_coding
ENSG00000111962.8	10.7324	3.97753	1.40147	2.83811	0.00453809	0.0184345	UST	protein_coding
ENSG00000203722.8	2.97976	4.93607	2.13105	2.31626	0.020544	0.0622541	RAET1G	protein_coding
ENSG00000198729.5	24.9792	7.37216	1.56074	4.72352	2.31802e-06	2.40317e-05	PPP1R14C	protein_coding
ENSG00000009765.14	7.64511	5.29222	1.78506	2.96472	0.00302956	0.0131582	IYD	protein_coding
ENSG00000120278.16	159.221	7.80369	0.715168	10.9117	1.0135e-27	1.12758e-25	PLEKHG1	protein_coding
ENSG00000120254.15	3026.66	-1.17804	0.206107	-5.71568	1.09265e-08	1.79053e-07	MTHFD1L	protein_coding
ENSG00000091831.23	9.51551	6.77754	1.71141	3.96022	7.48816e-05	0.000546817	ESR1	protein_coding
ENSG00000131018.23	949.707	1.06324	0.231378	4.59526	4.3222e-06	4.22093e-05	SYNE1	protein_coding
ENSG00000120279.6	3.37142	5.86698	2.14263	2.73822	0.00617728	0.0237947	MYCT1	protein_coding
ENSG00000112029.10	1639.31	-1.39562	0.229751	-6.07448	1.24388e-09	2.38195e-08	FBXO5	protein_coding
ENSG00000112038.18	9.55897	6.35855	1.77023	3.59194	0.000328228	0.00199576	OPRM1	protein_coding
ENSG00000029639.11	3240.71	1.11887	0.216174	5.17579	2.26945e-07	2.8986e-06	TFB1M	protein_coding
ENSG00000175048.17	409.838	-1.09118	0.289401	-3.77046	0.000162949	0.0010822	ZDHHC14	protein_coding
ENSG00000130340.15	1995.8	-1.10574	0.208933	-5.29233	1.20768e-07	1.63149e-06	SNX9	protein_coding
ENSG00000146425.11	1013.89	1.05342	0.2503	4.20863	2.56925e-05	0.000211608	DYNLT1	protein_coding
ENSG00000164674.15	27.5071	1.49496	0.652542	2.29099	0.0219642	0.0656966	SYTL3	protein_coding
ENSG00000164694.17	10.0865	5.56651	1.69499	3.2841	0.00102308	0.00530027	FNDC1	protein_coding
ENSG00000112096.18	8283.21	1.23523	0.212746	5.8061	6.39461e-09	1.08952e-07	SOD2	protein_coding
ENSG00000120437.8	4732.66	-1.60215	0.230329	-6.95593	3.50238e-12	9.24491e-11	ACAT2	protein_coding
ENSG00000130368.5	3.97747	4.70934	2.11875	2.22269	0.0262365	0.0756714	MAS1	protein_coding
ENSG00000146477.6	975.708	-2.59787	0.245758	-10.5708	4.06803e-26	4.16455e-24	SLC22A3	protein_coding
ENSG00000198670.11	10.2912	3.4726	1.27031	2.73367	0.00626331	0.024087	LPA	protein_coding
ENSG00000122194.18	9.46844	2.94314	1.24177	2.37011	0.0177827	0.0555236	PLG	protein_coding
ENSG00000085511.20	1897.35	-1.29792	0.223247	-5.81381	6.10662e-09	1.04589e-07	MAP3K4	protein_coding
ENSG00000026652.14	23.4822	4.51591	0.93464	4.83171	1.35367e-06	1.46606e-05	AGPAT4	protein_coding
ENSG00000112530.11	6.5797	5.99131	1.85637	3.22743	0.00124907	0.00629066	PACRG	protein_coding
ENSG00000112541.14	16.2852	7.54034	1.63103	4.62305	3.78144e-06	3.73758e-05	PDE10A	protein_coding
ENSG00000071242.12	72.8015	-1.77751	0.429061	-4.1428	3.43092e-05	0.000274279	RPS6KA2	protein_coding
ENSG00000026297.15	3066.11	-1.66196	0.239642	-6.9352	4.0566e-12	1.06142e-10	RNASET2	protein_coding
ENSG00000166984.11	27.2201	-2.24296	0.739652	-3.03246	0.0024257	0.0109727	TCP10L2	protein_coding
ENSG00000112494.10	354.54	-3.15988	0.291842	-10.8274	2.55385e-27	2.75039e-25	UNC93A	protein_coding
ENSG00000203690.12	22.387	-1.5772	0.757442	-2.08227	0.0373177	0.0992868	TCP10	protein_coding
ENSG00000125337.18	3.08558	4.85455	2.13207	2.27692	0.0227913	0.0676104	KIF25	protein_coding
ENSG00000153303.17	11.2012	6.27359	1.69537	3.70044	0.000215228	0.00138499	FRMD1	protein_coding
ENSG00000112562.18	3.68189	5.63347	2.20016	2.56048	0.0104528	0.0364832	SMOC2	protein_coding
ENSG00000130023.16	367.621	1.42496	0.278596	5.1148	3.14073e-07	3.91848e-06	ERMARD	protein_coding
ENSG00000177706.9	783.272	-1.91056	0.280605	-6.80872	9.84682e-12	2.45705e-10	FAM20C	protein_coding
ENSG00000164818.16	2173.97	-1.04455	0.258069	-4.04757	5.17529e-05	0.000393837	DNAAF5	protein_coding
ENSG00000073067.14	1422.73	-1.9884	0.272106	-7.30745	2.7226e-13	8.39025e-12	CYP2W1	protein_coding
ENSG00000164849.10	90.0967	-1.83028	0.42513	-4.30523	1.66809e-05	0.000143948	GPR146	protein_coding
ENSG00000164850.15	882.707	-2.72341	0.315508	-8.63182	6.03851e-18	3.16922e-16	GPER1	protein_coding
ENSG00000164877.19	472.353	1.95658	0.305855	6.39708	1.58372e-10	3.39629e-09	MICALL2	protein_coding
ENSG00000164855.16	881.154	-1.40619	0.284747	-4.93839	7.87699e-07	8.97883e-06	TMEM184A	protein_coding
ENSG00000225968.7	138.412	4.08996	0.432231	9.46244	3.00827e-21	2.04532e-19	ELFN1	protein_coding
ENSG00000157927.16	52.2793	2.65572	0.529031	5.01998	5.16779e-07	6.11594e-06	RADIL	protein_coding
ENSG00000164638.10	1235.44	-1.12936	0.306179	-3.68858	0.00022551	0.00143946	SLC29A4	protein_coding
ENSG00000182095.14	8962.8	-1.29724	0.259103	-5.00665	5.53848e-07	6.51739e-06	TNRC18	protein_coding
ENSG00000075624.15	89823.1	-1.62498	0.245283	-6.62494	3.474e-11	8.14756e-10	ACTB	protein_coding
ENSG00000236609.4	481.635	-1.35738	0.313482	-4.33002	1.49095e-05	0.000129742	ZNF853	protein_coding
ENSG00000215018.9	44.8143	3.90775	0.772966	5.05553	4.29191e-07	5.20051e-06	COL28A1	protein_coding
ENSG00000106415.13	788.52	-1.30377	0.244519	-5.33198	9.71491e-08	1.34342e-06	GLCCI1	protein_coding
ENSG00000003147.19	8.99278	3.0666	1.20883	2.53683	0.011186	0.0385427	ICA1	protein_coding
ENSG00000005108.16	12.9208	2.2891	0.970745	2.35809	0.0183693	0.0569278	THSD7A	protein_coding
ENSG00000006747.15	5.80714	4.65174	1.87072	2.48661	0.0128966	0.0431178	SCIN	protein_coding
ENSG00000136267.13	4.50873	5.4375	1.97935	2.74712	0.00601208	0.0232537	DGKB	protein_coding
ENSG00000214960.10	68.4263	2.50583	0.429384	5.83588	5.35058e-09	9.24048e-08	ISPD	protein_coding
ENSG00000048052.21	14.3224	5.80785	1.66616	3.48577	0.000490728	0.00282014	HDAC9	protein_coding
ENSG00000164651.16	10.3392	2.95309	1.14549	2.57801	0.00993717	0.0350745	SP8	protein_coding
ENSG00000105877.18	20.8262	6.18213	1.59756	3.86974	0.000108953	0.00075937	DNAH11	protein_coding
ENSG00000164649.20	567.564	-2.13219	0.252408	-8.44741	2.97824e-17	1.42426e-15	CDCA7L	protein_coding
ENSG00000105889.15	5.41374	5.53802	1.92959	2.87005	0.00410401	0.0169603	STEAP1B	protein_coding
ENSG00000196683.10	930.733	-1.01691	0.245386	-4.14414	3.41097e-05	0.00027337	TOMM7	protein_coding
ENSG00000122550.18	794.604	1.18	0.225375	5.23569	1.64371e-07	2.15879e-06	KLHL7	protein_coding
ENSG00000196335.13	8.9387	6.66367	1.77984	3.74398	0.000181127	0.0011903	STK31	protein_coding
ENSG00000105926.15	1589.98	-1.10449	0.308322	-3.58226	0.00034063	0.00205908	MPP6	protein_coding
ENSG00000105928.15	2347.32	2.65987	0.20097	13.2352	5.49813e-40	1.24396e-37	GSDME	protein_coding
ENSG00000070882.13	3367.64	1.07579	0.208562	5.15812	2.49447e-07	3.16649e-06	OSBPL3	protein_coding
ENSG00000050344.9	1032.82	-1.28246	0.250493	-5.11973	3.05972e-07	3.82807e-06	NFE2L3	protein_coding
ENSG00000122592.8	49.2095	2.65208	0.507058	5.23033	1.69211e-07	2.21373e-06	HOXA7	protein_coding
ENSG00000078399.18	4.26498	4.65811	1.96911	2.3656	0.018001	0.056069	HOXA9	protein_coding
ENSG00000253293.5	16.4606	2.25585	0.818715	2.75535	0.00586293	0.0228046	HOXA10	protein_coding
ENSG00000005073.5	7.81282	5.30633	1.76508	3.00628	0.00264462	0.0117784	HOXA11	protein_coding
ENSG00000153814.13	8.70374	6.39373	1.76089	3.63096	0.000282365	0.00175251	JAZF1	protein_coding
ENSG00000122574.10	595.678	7.5885	0.412108	18.4139	1.01713e-75	1.30405e-72	WIPF3	protein_coding
ENSG00000106080.10	1643.41	-1.48592	0.265795	-5.59047	2.26455e-08	3.52431e-07	FKBP14	protein_coding
ENSG00000106100.11	172.573	-1.29352	0.354848	-3.64529	0.000267092	0.0016712	NOD1	protein_coding
ENSG00000106105.14	6299.2	-1.45874	0.236987	-6.15537	7.49006e-10	1.48063e-08	GARS	protein_coding
ENSG00000180347.13	5.44051	5.4734	1.95517	2.79945	0.00511894	0.0203847	ITPRID1	protein_coding
[truncated: 3,229 more rows]

## Sheet: ADR effect for wt vs KO protein
Gene	BaseMean	log2FoldChange	lfcSE	stat	pvalue	padj	GeneName	GeneType
ENSG00000188976.11	3863.28	-0.740785	0.405569	-1.82653	0.0677704	0.222191	NOC2L	protein_coding
ENSG00000187961.14	356.981	-0.410514	0.509607	-0.805551	0.420502	0.661903	KLHL17	protein_coding
ENSG00000187583.10	61.1699	1.15696	0.750223	1.54216	0.123034	0.326088	PLEKHN1	protein_coding
ENSG00000188290.10	75.3367	-0.157233	0.645452	-0.243602	0.807539	0.912344	HES4	protein_coding
ENSG00000237330.3	1.37099	-3.72682	3.89116	-0.957765	0.338181	NA	RNF223	protein_coding
ENSG00000131591.17	330.76	-0.0350801	0.401486	-0.0873757	0.930373	0.971473	C1orf159	protein_coding
ENSG00000186891.14	0.755351	-0.787075	5.26451	-0.149506	0.881155	NA	TNFRSF18	protein_coding
ENSG00000186827.11	2.38959	-0.574581	2.77712	-0.206898	0.836089	NA	TNFRSF4	protein_coding
ENSG00000184163.3	11.4908	1.39567	1.35737	1.02822	0.303848	0.552451	C1QTNF12	protein_coding
ENSG00000160087.20	1684.38	0.323869	0.359941	0.899783	0.368236	0.614101	UBE2J2	protein_coding
ENSG00000162572.20	56.2124	0.903528	0.71248	1.26814	0.204747	0.439955	SCNN1D	protein_coding
ENSG00000131584.19	1340.15	0.775478	0.412876	1.87823	0.0603491	0.205301	ACAP3	protein_coding
ENSG00000169972.12	412.851	-0.361428	0.468165	-0.772009	0.440109	0.677341	PUSL1	protein_coding
ENSG00000127054.20	2166.12	-0.590197	0.399665	-1.47673	0.139748	0.351058	INTS11	protein_coding
ENSG00000224051.7	626.575	-0.180494	0.426289	-0.423406	0.671999	0.838845	CPTP	protein_coding
ENSG00000169962.5	20.63	-0.341584	1.04118	-0.328075	0.742855	0.880117	TAS1R3	protein_coding
ENSG00000107404.20	2017.71	0.690684	0.416083	1.65997	0.0969207	0.279917	DVL1	protein_coding
ENSG00000221978.12	5393.34	0.335599	0.341051	0.984013	0.325109	0.57413	CCNL2	protein_coding
ENSG00000205116.3	16.9419	1.83235	1.35123	1.35606	0.17508	0.400946	TMEM88B	protein_coding
ENSG00000160072.19	1437.97	-0.787976	0.410683	-1.9187	0.0550227	0.192545	ATAD3B	protein_coding
ENSG00000197785.13	1276.42	-0.4836	0.406741	-1.18896	0.234455	0.47826	ATAD3A	protein_coding
ENSG00000205090.9	19.1635	-2.07027	1.17977	-1.75482	0.0792908	0.24678	TMEM240	protein_coding
ENSG00000160075.12	3380.29	-0.11174	0.331553	-0.337019	0.736103	0.876775	SSU72	protein_coding
ENSG00000228594.4	158.245	0.676687	0.534994	1.26485	0.205925	0.441667	FNDC10	protein_coding
ENSG00000189409.13	2.90073	1.50715	2.70069	0.55806	0.576804	NA	MMP23B	protein_coding
ENSG00000248333.8	961.807	-0.335172	0.329109	-1.01842	0.308477	0.556904	CDK11B	protein_coding
ENSG00000189339.11	1713.74	0.298898	0.352509	0.847917	0.396484	0.640025	SLC35E2B	protein_coding
ENSG00000008128.23	142.812	0.00895795	0.490499	0.0182629	0.985429	0.993619	CDK11A	protein_coding
ENSG00000215790.7	558.759	0.207446	0.398035	0.521177	0.602244	0.794871	SLC35E2A	protein_coding
ENSG00000008130.15	1844.63	-0.128918	0.405069	-0.318261	0.750287	0.883574	NADK	protein_coding
ENSG00000078369.18	9088	-0.510463	0.314714	-1.62199	0.104806	0.294958	GNB1	protein_coding
ENSG00000187730.9	1.27507	3.45648	4.32719	0.798782	0.424417	NA	GABRD	protein_coding
ENSG00000116151.14	305.58	-0.28749	0.459856	-0.625174	0.531857	0.745332	MORN1	protein_coding
ENSG00000157916.20	3024.9	-0.0357898	0.336965	-0.106212	0.915414	0.965203	RER1	protein_coding
ENSG00000157911.10	862.385	0.173709	0.41342	0.420177	0.674356	0.839844	PEX10	protein_coding
ENSG00000157881.14	740.125	0.286929	0.417568	0.687143	0.491992	0.71672	PANK4	protein_coding
ENSG00000142606.16	3.94318	-1.6211	2.35546	-0.688231	0.491307	NA	MMEL1	protein_coding
ENSG00000215912.12	80.0213	0.21724	0.596118	0.364425	0.715541	0.865008	TTC34	protein_coding
ENSG00000169717.6	0.344912	3.02052	6.9724	0.433211	0.664861	NA	ACTRT2	protein_coding
ENSG00000130762.15	689.339	0.00341085	0.396961	0.0085924	0.993144	0.997254	ARHGEF16	protein_coding
ENSG00000162591.16	988.287	0.320508	0.551032	0.581651	0.560802	0.766653	MEGF6	protein_coding
ENSG00000158109.15	1174.16	-0.564351	0.366546	-1.53965	0.123646	0.326961	TPRG1L	protein_coding
ENSG00000078900.15	62.1918	-0.675815	0.677683	-0.997243	0.318647	0.568315	TP73	protein_coding
ENSG00000162592.10	0.787897	0.448466	5.5123	0.0813573	0.935158	NA	CCDC27	protein_coding
ENSG00000130764.10	1940.96	0.175531	0.346567	0.506483	0.612517	0.801677	LRRC47	protein_coding
ENSG00000116198.13	1507.44	0.0976994	0.29702	0.328932	0.742207	0.87974	CEP104	protein_coding
ENSG00000169598.15	238.828	-0.588762	0.470654	-1.25094	0.210955	0.448076	DFFB	protein_coding
ENSG00000196581.10	0.914213	0.891558	4.69037	0.190083	0.849244	NA	AJAP1	protein_coding
ENSG00000131697.18	1136.74	-0.599403	0.396408	-1.51208	0.130512	0.336951	NPHP4	protein_coding
ENSG00000069424.14	1165.31	0.654445	0.38336	1.70713	0.0877977	0.262631	KCNAB2	protein_coding
ENSG00000285629.1	2.45274	0.754616	2.686	0.280944	0.778753	NA	AL031847.2	protein_coding
ENSG00000116251.11	2861.47	0.249968	0.33655	0.742738	0.45764	0.691406	RPL22	protein_coding
ENSG00000173673.7	0.610053	-2.91301	5.68177	-0.512694	0.608165	NA	HES3	protein_coding
ENSG00000097021.19	1443.01	0.177079	0.394574	0.448784	0.653587	0.826841	ACOT7	protein_coding
ENSG00000215788.10	41.9031	1.22436	0.878109	1.39432	0.163221	0.386051	TNFRSF25	protein_coding
ENSG00000171680.21	387.784	0.731232	0.450152	1.62441	0.104289	0.293914	PLEKHG5	protein_coding
ENSG00000162408.11	2234.25	-0.0184697	0.295369	-0.0625309	0.95014	0.979945	NOL9	protein_coding
ENSG00000173662.21	43.2942	0.673688	0.779187	0.864604	0.387256	0.631513	TAS1R1	protein_coding
ENSG00000204859.13	373.171	0.590276	0.450576	1.31005	0.19018	0.421187	ZBTB48	protein_coding
ENSG00000041988.15	327.235	0.0543677	0.459206	0.118395	0.905755	0.960265	THAP3	protein_coding
ENSG00000007923.16	3151.43	-0.297215	0.338528	-0.87796	0.379965	0.624649	DNAJC11	protein_coding
ENSG00000171735.19	1132.01	-0.193497	0.299102	-0.646928	0.517679	0.73477	CAMTA1	protein_coding
ENSG00000049245.13	3446.49	0.144294	0.304379	0.47406	0.635457	0.816114	VAMP3	protein_coding
ENSG00000049246.14	252.206	-0.525876	0.386258	-1.36146	0.173368	0.398932	PER3	protein_coding
ENSG00000049247.13	1.49372	0.911812	4.12926	0.220817	0.825235	NA	UTS2	protein_coding
ENSG00000049249.8	9.36404	2.51002	2.00329	1.25295	0.210225	0.447305	TNFRSF9	protein_coding
ENSG00000116288.13	4005.7	-0.569235	0.331759	-1.71581	0.0861967	0.259595	PARK7	protein_coding
ENSG00000116285.13	11729.8	0.0564899	0.371941	0.151879	0.879282	0.947491	ERRFI1	protein_coding
ENSG00000162426.14	9.00968	-2.00561	2.14967	-0.932983	0.350829	NA	SLC45A1	protein_coding
ENSG00000142599.18	8625.12	-0.239051	0.329379	-0.725761	0.467986	0.69906	RERE	protein_coding
ENSG00000074800.15	52541.3	-0.621255	0.34447	-1.80351	0.0713084	0.229613	ENO1	protein_coding
ENSG00000131686.15	1.48429	4.86024	4.19722	1.15796	0.246878	NA	CA6	protein_coding
ENSG00000197241.3	2.08727	-0.849987	3.11493	-0.272875	0.784949	NA	SLC2A7	protein_coding
ENSG00000142583.17	19.3131	3.44567	2.29091	1.50407	0.132565	0.340104	SLC2A5	protein_coding
ENSG00000180758.12	735.151	-0.414799	0.384285	-1.07941	0.280407	0.528068	GPR157	protein_coding
ENSG00000049239.12	1745.17	0.428233	0.384577	1.11352	0.265487	0.5125	H6PD	protein_coding
ENSG00000171621.14	641.653	-0.46469	0.409892	-1.13369	0.256925	0.503192	SPSB1	protein_coding
ENSG00000171612.7	1853.65	0.476032	0.354593	1.34247	0.179442	0.406785	SLC25A33	protein_coding
ENSG00000188807.13	2116.01	-0.485986	0.405545	-1.19835	0.23078	0.473765	TMEM201	protein_coding
ENSG00000171608.15	1371.94	-0.217654	0.359165	-0.606	0.544515	0.755455	PIK3CD	protein_coding
ENSG00000171603.17	6177.73	-0.46159	0.37263	-1.23874	0.215444	0.453383	CLSTN1	protein_coding
ENSG00000178585.15	1676	-0.264342	0.364212	-0.72579	0.467967	0.69906	CTNNBIP1	protein_coding
ENSG00000162441.12	1526.88	-0.25194	0.381633	-0.660162	0.50915	0.729136	LZIC	protein_coding
ENSG00000173614.14	295.67	0.311524	0.473307	0.658186	0.510419	0.73008	NMNAT1	protein_coding
ENSG00000162444.12	293.153	-0.762466	0.39482	-1.93117	0.0534615	0.188905	RBP7	protein_coding
ENSG00000130939.19	2832.57	0.207783	0.276168	0.752379	0.451823	0.687592	UBE4B	protein_coding
ENSG00000142657.21	9029.95	-0.317193	0.363027	-0.873747	0.382256	0.626525	PGD	protein_coding
ENSG00000251503.8	3.58821	-1.99807	2.33392	-0.856099	0.391943	NA	CENPS-CORT	protein_coding
ENSG00000175279.22	29.8811	-0.371938	0.808606	-0.459975	0.645534	0.821749	CENPS	protein_coding
ENSG00000241563.3	7.95432	-0.755672	1.5491	-0.487813	0.625682	NA	CORT	protein_coding
ENSG00000160049.12	2333.01	0.107746	0.297729	0.361892	0.717432	0.866229	DFFA	protein_coding
ENSG00000142655.13	670.537	-0.187653	0.440742	-0.425765	0.670279	0.837774	PEX14	protein_coding
ENSG00000175262.14	2.7229	3.2444	3.00276	1.08047	0.279932	NA	C1orf127	protein_coding
ENSG00000120948.17	3681.74	0.0699422	0.31843	0.219647	0.826146	0.920887	TARDBP	protein_coding
ENSG00000277726.4	0.284437	3.2387	7.03951	0.460075	0.645462	NA	AL109811.3	protein_coding
ENSG00000171824.14	3256.88	-0.327597	0.297572	-1.1009	0.270939	0.518143	EXOSC10	protein_coding
ENSG00000198793.12	5163.77	-0.0902625	0.347282	-0.259911	0.794932	0.906845	MTOR	protein_coding
ENSG00000171819.5	1.06297	-1.39004	4.30051	-0.323228	0.746523	NA	ANGPTL7	protein_coding
ENSG00000120942.13	1369.45	-0.420219	0.322648	-1.30241	0.192778	0.42431	UBIAD1	protein_coding
ENSG00000204624.8	12.2983	1.98314	1.42496	1.39172	0.164008	0.387194	DISP3	protein_coding
ENSG00000116661.11	2419.4	0.575988	0.375074	1.53567	0.12462	0.328253	FBXO2	protein_coding
ENSG00000177674.16	872.526	0.264886	0.468914	0.564893	0.572147	0.773852	AGTRAP	protein_coding
ENSG00000215910.7	4.9562	2.40989	2.83498	0.850056	0.395294	NA	C1orf167	protein_coding
ENSG00000177000.12	507.579	0.0250554	0.388853	0.064434	0.948625	0.979945	MTHFR	protein_coding
ENSG00000011021.23	1814.5	0.0447897	0.336088	0.133268	0.893982	0.955416	CLCN6	protein_coding
ENSG00000175206.10	0.473733	0.341634	6.9208	0.0493633	0.96063	NA	NPPA	protein_coding
ENSG00000120937.9	3.18137	1.66248	2.55081	0.651746	0.514565	NA	NPPB	protein_coding
ENSG00000116688.16	4788.09	-0.109643	0.35201	-0.311476	0.755439	0.886676	MFN2	protein_coding
ENSG00000120949.15	4.04467	0.171225	2.66672	0.064208	0.948805	NA	TNFRSF8	protein_coding
ENSG00000028137.19	3.3889	-1.45708	2.2124	-0.658596	0.510155	NA	TNFRSF1B	protein_coding
ENSG00000048707.15	3298.17	0.363787	0.287428	1.26566	0.205634	0.441258	VPS13D	protein_coding
ENSG00000162496.9	2997.01	-0.0413747	0.328019	-0.126135	0.899625	0.957365	DHRS3	protein_coding
ENSG00000204518.2	0.456283	-0.00917475	6.8224	-0.0013448	0.998927	NA	AADACL4	protein_coding
ENSG00000188984.12	1.2777	0.829663	4.27088	0.194261	0.845972	NA	AADACL3	protein_coding
ENSG00000157330.10	0.973237	0.151143	4.67807	0.0323089	0.974226	NA	C1orf158	protein_coding
ENSG00000116726.4	0.101672	-1.29892	7.06196	-0.183933	0.854066	NA	PRAMEF12	protein_coding
ENSG00000116721.9	0.341313	-0.937297	6.98898	-0.134111	0.893315	NA	PRAMEF1	protein_coding
ENSG00000239810.3	0.229941	2.43908	6.99904	0.348488	0.727474	NA	PRAMEF11	protein_coding
ENSG00000179172.9	0.928241	2.31213	4.49869	0.513957	0.607282	NA	HNRNPCL1	protein_coding
ENSG00000120952.4	0.354611	0.88934	6.98686	0.127288	0.898713	NA	PRAMEF2	protein_coding
ENSG00000243073.3	0.366737	-1.52159	7.04576	-0.215958	0.82902	NA	PRAMEF4	protein_coding
ENSG00000187545.5	0.203345	-2.20785	7.00069	-0.315376	0.752476	NA	PRAMEF10	protein_coding
ENSG00000274764.5	0.12467	-1.44765	7.05512	-0.205192	0.837422	NA	PRAMEF27	protein_coding
ENSG00000277058.2	0.135194	1.62948	7.05747	0.230888	0.817402	NA	HNRNPCL3	protein_coding
ENSG00000275774.2	0.229941	2.43908	6.99904	0.348488	0.727474	NA	HNRNPCL2	protein_coding
ENSG00000204505.4	0.12467	-1.44765	7.05512	-0.205192	0.837422	NA	PRAMEF9	protein_coding
ENSG00000182330.10	0.259864	0.0797654	7.04538	0.0113217	0.990967	NA	PRAMEF8	protein_coding
ENSG00000237700.2	0.567654	-1.93668	6.2388	-0.310425	0.756238	NA	PRAMEF33	protein_coding
ENSG00000204481.7	0.395058	1.1018	6.97585	0.157945	0.8745	NA	PRAMEF14	protein_coding
ENSG00000204480.8	0.12467	-1.44765	7.05512	-0.205192	0.837422	NA	PRAMEF19	protein_coding
ENSG00000204479.4	0.384533	-0.947744	6.97702	-0.135838	0.891949	NA	PRAMEF17	protein_coding
ENSG00000204478.9	0.203345	-2.20785	7.00069	-0.315376	0.752476	NA	PRAMEF20	protein_coding
ENSG00000162494.6	10.7901	7.97968	6.92013	1.15311	0.248865	0.494107	LRRC38	protein_coding
ENSG00000162493.16	1.17091	4.47552	4.52014	0.990129	0.322111	NA	PDPN	protein_coding
ENSG00000116731.22	1538.03	0.0536654	0.294113	0.182465	0.855218	0.935519	PRDM2	protein_coding
ENSG00000142621.19	16.7841	-3.43562	1.80671	-1.90159	0.0572252	0.197647	FHAD1	protein_coding
ENSG00000162438.11	0.876752	-4.48067	4.98046	-0.899649	0.368307	NA	CTRC	protein_coding
ENSG00000142615.8	0.229941	2.43908	6.99904	0.348488	0.727474	NA	CELA2A	protein_coding
ENSG00000215704.9	0.380347	1.11052	6.99261	0.158813	0.873816	NA	CELA2B	protein_coding
ENSG00000132906.18	369.107	-0.0806394	0.354634	-0.227388	0.820122	0.917974	CASP9	protein_coding
ENSG00000116138.13	1406.89	0.513369	0.316681	1.62109	0.104998	0.295426	DNAJC16	protein_coding
ENSG00000197312.12	3575.57	0.24442	0.282945	0.863843	0.387674	0.631925	DDI2	protein_coding
ENSG00000116786.13	2295.08	0.403437	0.401662	1.00442	0.315177	0.564279	PLEKHM2	protein_coding
ENSG00000162460.7	7.90723	0.231278	1.51092	0.15307	0.878343	NA	TMEM82	protein_coding
ENSG00000233954.6	97.8996	-0.324814	0.547169	-0.593626	0.552762	0.761594	UQCRHL	protein_coding
ENSG00000065526.11	5927.95	0.066902	0.284537	0.235126	0.814111	0.914948	SPEN	protein_coding
ENSG00000116809.11	693.885	-0.309293	0.427107	-0.724159	0.468968	0.699849	ZBTB17	protein_coding
ENSG00000183888.4	638.357	-0.445567	0.344687	-1.29267	0.196124	0.42884	SRARP	protein_coding
ENSG00000173641.17	3.5987	1.25849	3.02668	0.4158	0.677556	NA	HSPB7	protein_coding
ENSG00000186510.12	4.90258	-0.63091	2.17112	-0.290592	0.771363	NA	CLCNKA	protein_coding
ENSG00000184908.17	3.87742	-2.49171	2.53967	-0.981116	0.326536	NA	CLCNKB	protein_coding
ENSG00000185519.9	1.4622	0.0184965	4.38538	0.00421776	0.996635	NA	FAM131C	protein_coding
ENSG00000142627.13	7524.44	0.109932	0.40551	0.271097	0.786317	0.902471	EPHA2	protein_coding
ENSG00000142632.17	166.898	-0.182607	0.488331	-0.37394	0.708449	0.860206	ARHGEF19	protein_coding
ENSG00000132881.12	25.1434	1.36813	0.914941	1.49532	0.13483	0.343682	CPLANE2	protein_coding
ENSG00000037637.11	1048.04	0.0944979	0.314856	0.30013	0.764078	0.891348	FBXO42	protein_coding
ENSG00000055070.17	3745.4	-0.000930817	0.350867	-0.0026529	0.997883	0.998951	SZRD1	protein_coding
ENSG00000157191.20	1581.57	-0.242132	0.340718	-0.710651	0.477301	0.706278	NECAP2	protein_coding
ENSG00000159363.18	1552.44	-0.710031	0.421929	-1.68282	0.0924095	0.270993	ATP13A2	protein_coding
ENSG00000117118.9	1583.92	-0.0474164	0.312803	-0.151586	0.879514	0.947584	SDHB	protein_coding
ENSG00000117115.13	3.50778	1.94684	2.62553	0.741505	0.458387	NA	PADI2	protein_coding
ENSG00000142623.11	2.54265	4.42297	3.71315	1.19116	0.233589	NA	PADI1	protein_coding
ENSG00000276747.1	2.78049	4.26612	3.37089	1.26558	0.205665	NA	PADI6	protein_coding
ENSG00000179051.14	7163.86	0.0281862	0.335241	0.0840776	0.932995	0.97328	RCC2	protein_coding
ENSG00000117154.12	0.250165	2.54851	6.99318	0.364428	0.715538	NA	IGSF21	protein_coding
ENSG00000009709.12	1.56749	0.264694	3.91158	0.0676693	0.946049	NA	PAX7	protein_coding
ENSG00000179002.5	0.845392	1.48004	4.67391	0.316659	0.751502	NA	TAS1R2	protein_coding
ENSG00000255275.3	11.1639	-0.760951	1.29051	-0.589649	0.555426	0.763288	AL080251.1	protein_coding
ENSG00000159423.17	1360.74	-0.56672	0.381029	-1.48734	0.136925	0.346596	ALDH4A1	protein_coding
ENSG00000127481.15	23434.7	-0.041238	0.313271	-0.131637	0.895271	0.955858	UBR4	protein_coding
ENSG00000127463.15	4977.31	-0.364727	0.292733	-1.24594	0.212786	0.450245	EMC1	protein_coding
ENSG00000162482.5	35.2993	-0.842283	0.769398	-1.09473	0.273635	0.520454	AKR7A3	protein_coding
ENSG00000173436.15	304.215	0.504881	0.447472	1.1283	0.259194	0.50542	MICOS10	protein_coding
ENSG00000270136.6	0.318315	-0.798562	6.99649	-0.114138	0.909129	NA	MICOS10-NBL1	protein_coding
ENSG00000158748.4	2.07843	-4.78371	3.59909	-1.32915	0.1838	NA	HTR6	protein_coding
ENSG00000162542.13	235.951	-0.73524	0.465331	-1.58004	0.114098	0.31062	TMCO4	protein_coding
ENSG00000178828.7	0.815671	-2.45073	5.05992	-0.484341	0.628144	NA	RNF186	protein_coding
ENSG00000188784.4	9.46478	-0.367416	1.43454	-0.256121	0.797857	0.907967	PLA2G2E	protein_coding
ENSG00000127472.11	3.27618	-3.07521	2.87111	-1.07109	0.284131	NA	PLA2G5	protein_coding
ENSG00000117215.14	1.75913	0.869219	3.7241	0.233404	0.815448	NA	PLA2G2D	protein_coding
ENSG00000158786.4	5.32976	-0.37985	1.963	-0.193504	0.846564	NA	PLA2G2F	protein_coding
ENSG00000187980.6	1.54657	-0.903385	3.85175	-0.234539	0.814567	NA	PLA2G2C	protein_coding
ENSG00000158816.15	1.45334	1.10085	4.01076	0.274474	0.78372	NA	VWA5B1	protein_coding
ENSG00000183114.8	208.378	0.187004	0.480076	0.389529	0.696885	0.853707	FAM43B	protein_coding
ENSG00000158825.6	29.8951	1.05473	0.929136	1.13517	0.256304	0.502849	CDA	protein_coding
ENSG00000158828.8	732.446	0.627064	0.404774	1.54917	0.121341	0.32314	PINK1	protein_coding
ENSG00000244038.9	9574.07	-0.00584301	0.387505	-0.0150785	0.98797	0.994654	DDOST	protein_coding
ENSG00000117245.12	84.0346	0.791437	0.692622	1.14267	0.253177	0.499488	KIF17	protein_coding
ENSG00000127483.18	6869.3	0.394751	0.311048	1.2691	0.204406	0.439367	HP1BP3	protein_coding
ENSG00000117298.16	2994.65	0.34682	0.398343	0.870658	0.383941	0.628079	ECE1	protein_coding
ENSG00000142794.18	334.04	0.596582	0.36602	1.62992	0.103119	0.291771	NBPF3	protein_coding
ENSG00000076864.19	1368.13	0.0404947	0.393548	0.102897	0.918045	0.966358	RAP1GAP	protein_coding
ENSG00000187942.11	6.08484	0.178169	2.11223	0.0843512	0.932777	NA	LDLRAD2	protein_coding
ENSG00000219073.7	3.79778	-1.11253	2.75391	-0.403983	0.686226	NA	CELA3B	protein_coding
ENSG00000142789.19	1.30152	2.21061	4.27804	0.516734	0.605342	NA	CELA3A	protein_coding
ENSG00000070831.16	8730.65	0.39471	0.332102	1.18852	0.234628	0.478398	CDC42	protein_coding
ENSG00000162552.15	2.51326	1.77114	3.38331	0.523494	0.60063	NA	WNT4	protein_coding
ENSG00000184677.18	3263.67	-0.341172	0.318116	-1.07248	0.283506	0.531373	ZBTB40	protein_coding
ENSG00000070886.12	1.51495	0.19865	3.41359	0.0581938	0.953594	NA	EPHA8	protein_coding
ENSG00000173372.17	0.591978	-1.38902	6.21387	-0.223535	0.823119	NA	C1QA	protein_coding
ENSG00000159189.12	2.30586	0.797271	2.66335	0.299348	0.764674	NA	C1QC	protein_coding
ENSG00000173369.16	1.71712	1.8469	2.99828	0.615987	0.537903	NA	C1QB	protein_coding
ENSG00000133216.16	19.8397	1.35452	1.25132	1.08248	0.279041	0.526694	EPHB2	protein_coding
ENSG00000215906.8	8.29211	0.645587	1.64199	0.393172	0.694192	NA	LACTBL1	protein_coding
ENSG00000227868.6	3.00116	0.028804	3.17496	0.00907226	0.992761	NA	TEX46	protein_coding
ENSG00000004487.16	4786.76	-0.0994826	0.29165	-0.341103	0.733026	0.875211	KDM1A	protein_coding
ENSG00000169641.13	2384.6	0.338037	0.287661	1.17512	0.239945	0.484229	LUZP1	protein_coding
ENSG00000179546.4	50.8028	-1.34582	0.934424	-1.44027	0.149791	0.365066	HTR1D	protein_coding
ENSG00000125944.20	9762.89	-0.0942035	0.313739	-0.30026	0.763979	0.891348	HNRNPR	protein_coding
ENSG00000088280.19	1494.59	-0.700057	0.360123	-1.94394	0.0519027	0.18519	ASAP3	protein_coding
ENSG00000117318.9	3897.2	-0.487535	0.373339	-1.30588	0.191594	0.422605	ID3	protein_coding
ENSG00000142676.14	27088	-0.347084	0.351869	-0.986401	0.323936	0.573015	RPL11	protein_coding
ENSG00000011007.12	3028.74	-0.245992	0.29265	-0.840567	0.400591	0.644212	ELOA	protein_coding
ENSG00000057757.10	877.68	-0.497436	0.319857	-1.55518	0.119902	0.320294	PITHD1	protein_coding
ENSG00000011009.11	3352.16	0.760922	0.399631	1.90406	0.0569019	0.196807	LYPLA2	protein_coding
ENSG00000117308.15	2200.67	0.266047	0.37548	0.708552	0.478603	0.706824	GALE	protein_coding
ENSG00000188822.8	3.26705	1.81968	2.82597	0.643913	0.519632	NA	CNR2	protein_coding
ENSG00000189266.13	4518.89	-0.456353	0.305367	-1.49444	0.13506	0.343989	PNRC2	protein_coding
ENSG00000188529.14	6271.43	-0.04656	0.334667	-0.139124	0.889352	0.953193	SRSF10	protein_coding
ENSG00000001460.18	117.137	-0.70481	0.515455	-1.36735	0.171514	0.39716	STPG1	protein_coding
ENSG00000184454.7	63.5959	-0.937407	0.858488	-1.09193	0.274865	0.521594	NCMAP	protein_coding
ENSG00000133226.17	5518.15	-0.223279	0.280982	-0.794637	0.426825	0.666907	SRRM1	protein_coding
ENSG00000020633.18	16.2241	-1.12108	1.14718	-0.977246	0.328447	0.577251	RUNX3	protein_coding
ENSG00000117616.18	2026.22	0.339455	0.316235	1.07343	0.28308	0.531015	RSRP1	protein_coding
ENSG00000187010.21	4.19793	1.22708	2.92897	0.418946	0.675256	NA	RHD	protein_coding
ENSG00000183726.11	1643.66	0.243797	0.374577	0.650858	0.515138	0.732777	TMEM50A	protein_coding
ENSG00000204178.11	1484.09	0.389764	0.294568	1.32317	0.185778	0.415675	MACO1	protein_coding
ENSG00000157978.11	670.236	-0.636919	0.359488	-1.77174	0.0764379	0.240917	LDLRAP1	protein_coding
ENSG00000162430.17	2345.29	0.137234	0.410455	0.334346	0.738118	0.877644	SELENON	protein_coding
ENSG00000158006.14	278.92	-0.704928	0.397979	-1.77127	0.0765163	0.241125	PAFAH2	protein_coding
ENSG00000158008.9	20.8088	1.76057	1.06224	1.65741	0.097436	0.280613	EXTL1	protein_coding
ENSG00000158014.14	1.56703	2.94635	3.52585	0.835642	0.403357	NA	SLC30A2	protein_coding
ENSG00000175087.10	255.043	0.282743	0.451273	0.626546	0.530957	0.744826	PDIK1L	protein_coding
ENSG00000197245.6	0.338539	-0.680407	6.99088	-0.0973278	0.922466	NA	FAM110D	protein_coding
ENSG00000282872.1	0.101672	-1.29892	7.06196	-0.183933	0.854066	NA	C1orf232	protein_coding
ENSG00000236782.7	2.84669	-0.671429	2.6539	-0.252997	0.800271	NA	AL391650.1	protein_coding
ENSG00000142684.9	940.59	-0.0803451	0.403535	-0.199103	0.842182	0.929229	ZNF593	protein_coding
ENSG00000142675.18	400.73	0.0756135	0.425531	0.177692	0.858965	0.936957	CNKSR1	protein_coding
ENSG00000188782.8	0.624674	-3.48972	6.10423	-0.571689	0.567532	NA	CATSPER4	protein_coding
ENSG00000142669.15	798.357	-0.400271	0.387001	-1.03429	0.301001	0.550131	SH3BGRL3	protein_coding
ENSG00000169442.9	0.6214	-0.429658	6.041	-0.0711237	0.943299	NA	CD52	protein_coding
ENSG00000176092.15	110.916	0.181361	0.548928	0.330391	0.741104	0.879271	CRYBG2	protein_coding
ENSG00000131914.11	5.18858	1.38077	2.42836	0.568601	0.569627	NA	LIN28A	protein_coding
ENSG00000117682.17	1089.48	-0.160405	0.337964	-0.474621	0.635057	0.815921	DHDDS	protein_coding
ENSG00000117713.20	6260.34	-0.265538	0.32409	-0.819337	0.412594	0.655105	ARID1A	protein_coding
ENSG00000060642.10	486.432	-0.0156067	0.333712	-0.0467669	0.962699	0.985015	PIGV	protein_coding
ENSG00000204160.12	1171.68	-0.415253	0.395835	-1.04906	0.294153	0.54241	ZDHHC18	protein_coding
ENSG00000175793.12	1067.37	0.669706	0.456322	1.46762	0.142208	0.354608	SFN	protein_coding
ENSG00000142751.15	1070.04	-0.0190827	0.344592	-0.0553777	0.955838	0.982414	GPN2	protein_coding
ENSG00000198746.13	631.594	-0.57879	0.370583	-1.56184	0.118326	0.317639	GPATCH3	protein_coding
ENSG00000090273.14	5367.78	-0.491921	0.35131	-1.40025	0.161439	0.383187	NUDC	protein_coding
ENSG00000175707.9	85.5295	-0.428482	0.625596	-0.684919	0.493395	0.717818	KDF1	protein_coding
ENSG00000158246.8	59.1996	-1.00211	0.653953	-1.53239	0.125427	0.329319	TENT5B	protein_coding
ENSG00000090020.11	1351.24	0.53909	0.371356	1.45168	0.146591	0.360606	SLC9A1	protein_coding
ENSG00000142784.16	871.269	-0.69646	0.407628	-1.70857	0.0875307	0.261965	WDTC1	protein_coding
ENSG00000186501.14	948.762	-0.51336	0.409908	-1.25238	0.210432	0.447438	TMEM222	protein_coding
ENSG00000142748.12	0.254852	-2.88564	7.05456	-0.409047	0.682505	NA	FCN3	protein_coding
ENSG00000181773.7	296.177	0.64077	0.448464	1.42881	0.153059	0.370244	GPR3	protein_coding
ENSG00000158195.11	5048.81	0.445182	0.314455	1.41573	0.156856	0.376324	WASF2	protein_coding
ENSG00000000938.13	2.84206	2.63977	3.15343	0.837111	0.40253	NA	FGR	protein_coding
ENSG00000126709.15	836.184	-0.0375104	0.384567	-0.0975393	0.922298	0.968326	IFI6	protein_coding
ENSG00000009780.15	605.887	-0.172737	0.34355	-0.502801	0.615104	0.803156	FAM76A	protein_coding
ENSG00000117751.18	1804.06	-0.60454	0.32245	-1.87483	0.0608158	0.206525	PPP1R8	protein_coding
ENSG00000158156.7	308.908	-0.207461	0.403143	-0.51461	0.606825	0.798076	XKR8	protein_coding
ENSG00000158161.16	1438.93	0.0637124	0.348813	0.182655	0.855069	0.935513	EYA3	protein_coding
ENSG00000126698.11	3947.74	0.32216	0.338084	0.952899	0.340641	0.588364	DNAJC8	protein_coding
ENSG00000130770.18	1733.12	-0.546024	0.316001	-1.72792	0.0840029	0.255263	ATP5IF1	protein_coding
ENSG00000130772.14	276.055	-0.0536219	0.391365	-0.137012	0.891021	0.954193	MED18	protein_coding
ENSG00000204138.13	3286.9	0.5021	0.326637	1.53718	0.124249	0.328024	PHACTR4	protein_coding
ENSG00000180098.9	512.13	-0.627163	0.36254	-1.72991	0.0836456	0.254723	TRNAU1AP	protein_coding
ENSG00000120656.11	354.543	-0.163069	0.362762	-0.449521	0.653056	0.826396	TAF12	protein_coding
ENSG00000162419.12	435.03	-0.0634933	0.337113	-0.188344	0.850607	0.933491	GMEB1	protein_coding
ENSG00000198492.16	3066.54	0.0245477	0.300343	0.0817321	0.93486	0.973968	YTHDF2	protein_coding
ENSG00000159023.21	4444.26	0.211483	0.312845	0.675999	0.499041	0.721703	EPB41	protein_coding
ENSG00000116350.17	3074.79	-0.217504	0.276494	-0.786652	0.431486	0.670457	SRSF4	protein_coding
ENSG00000116353.15	556.456	-0.492434	0.366256	-1.34451	0.178784	0.406068	MECR	protein_coding
ENSG00000162510.6	4.91264	1.60134	2.01666	0.794057	0.427162	NA	MATN1	protein_coding
ENSG00000134644.15	7795.17	0.381845	0.284364	1.34281	0.179335	0.406785	PUM1	protein_coding
ENSG00000084628.10	21.6142	-0.775237	0.979505	-0.791458	0.428677	0.668396	NKAIN1	protein_coding
ENSG00000121769.7	8.75173	0.385339	1.62192	0.237582	0.812205	NA	FABP3	protein_coding
ENSG00000142910.16	1137.04	-0.346781	0.373318	-0.928916	0.352933	0.598934	TINAGL1	protein_coding
ENSG00000121764.11	5.90673	1.33063	2.68994	0.494667	0.620835	NA	HCRTR1	protein_coding
ENSG00000162517.13	1518.37	-0.385983	0.373828	-1.03251	0.301831	0.550807	PEF1	protein_coding
ENSG00000121753.12	33.0865	2.00773	1.18686	1.69164	0.0907155	0.268025	ADGRB2	protein_coding
ENSG00000134668.12	16.5084	0.497444	1.31837	0.377319	0.705937	0.858893	SPOCD1	protein_coding
ENSG00000184007.21	3605.91	-0.372468	0.372006	-1.00124	0.31671	0.566198	PTP4A2	protein_coding
ENSG00000121774.18	6270.83	-0.387333	0.282792	-1.36968	0.170788	0.3962	KHDRBS1	protein_coding
ENSG00000084652.16	6423.05	-0.327733	0.322531	-1.01613	0.309568	0.558177	TXLNA	protein_coding
ENSG00000160050.14	61.6456	-1.20882	0.696835	-1.73473	0.0827884	0.253647	CCDC28B	protein_coding
ENSG00000222046.2	1.71735	-1.12691	3.40422	-0.331032	0.740621	NA	DCDC2B	protein_coding
ENSG00000084623.11	4972.29	-0.472615	0.344061	-1.37364	0.169555	0.39497	EIF3I	protein_coding
ENSG00000183615.6	8.60767	-0.89263	1.46002	-0.61138	0.540948	NA	FAM167B	protein_coding
ENSG00000162526.7	78.0776	0.164186	0.636899	0.25779	0.796569	0.9075	TSSK3	protein_coding
ENSG00000225828.1	404.705	-0.0285548	0.426668	-0.0669251	0.946641	0.979092	FAM229A	protein_coding
ENSG00000160058.18	2651.21	-0.221591	0.341392	-0.649079	0.516287	0.733785	BSDC1	protein_coding
ENSG00000273274.2	8.88515	-0.171436	1.71312	-0.100072	0.920287	NA	ZBTB8B	protein_coding
ENSG00000160062.15	130.887	-0.294783	0.495292	-0.595169	0.551731	0.760988	ZBTB8A	protein_coding
ENSG00000176261.15	727.475	-0.150923	0.339088	-0.445085	0.656258	0.828261	ZBTB8OS	protein_coding
ENSG00000162521.19	8511.8	-0.405972	0.34765	-1.16776	0.242903	0.487793	RBBP4	protein_coding
ENSG00000162520.14	204.52	-0.0229755	0.440931	-0.0521067	0.958444	0.983717	SYNC	protein_coding
ENSG00000162522.11	2535.07	-0.12813	0.416398	-0.307711	0.758302	0.88838	KIAA1522	protein_coding
ENSG00000116497.18	1309.36	-0.163721	0.358557	-0.45661	0.647951	0.823425	S100PBP	protein_coding
ENSG00000160097.18	31.534	0.0324261	0.816411	0.0397179	0.968318	0.987313	FNDC5	protein_coding
ENSG00000121905.10	1.31288	-2.13914	4.26822	-0.501179	0.616245	NA	HPCA	protein_coding
ENSG00000004455.16	4046.22	-0.466814	0.285335	-1.63602	0.101835	0.289179	AK2	protein_coding
ENSG00000142920.17	102.053	-0.0272695	0.515939	-0.0528541	0.957848	0.983619	AZIN2	protein_coding
ENSG00000116525.14	179.011	-0.068052	0.496804	-0.136979	0.891047	0.954193	TRIM62	protein_coding
ENSG00000160094.15	1026.52	-0.364001	0.367365	-0.990843	0.321762	0.570893	ZNF362	protein_coding
ENSG00000184389.9	0.716975	1.63239	5.06425	0.322336	0.747198	NA	A3GALT2	protein_coding
ENSG00000134686.18	3190.06	-0.477281	0.38738	-1.23208	0.21792	0.456089	PHC2	protein_coding
ENSG00000121903.14	227.748	0.66483	0.401133	1.65738	0.0974428	0.280613	ZSCAN20	protein_coding
ENSG00000121904.17	10.4951	2.3689	2.08754	1.13478	0.256468	0.502851	CSMD2	protein_coding
ENSG00000176256.10	0.365136	3.09683	6.96963	0.444333	0.656802	NA	HMGB4	protein_coding
ENSG00000142698.15	0.333527	-3.64586	7.00012	-0.520827	0.602487	NA	C1orf94	protein_coding
ENSG00000163866.9	1216.94	-0.448343	0.311682	-1.43846	0.150303	0.365785	SMIM12	protein_coding
ENSG00000189280.3	3.7281	4.91792	3.39014	1.45065	0.146877	NA	GJB5	protein_coding
ENSG00000189433.6	0.210694	0.0809756	7.05398	0.0114794	0.990841	NA	GJB4	protein_coding
ENSG00000188910.8	2.50412	-2.03966	3.27681	-0.622454	0.533643	NA	GJB3	protein_coding
ENSG00000187513.9	0.216643	0.110366	7.05779	0.0156375	0.987524	NA	GJA4	protein_coding
ENSG00000116544.12	19.2686	-1.26924	1.11191	-1.1415	0.253663	0.500203	DLGAP3	protein_coding
ENSG00000284773.1	8.74196	-0.243895	1.49589	-0.163044	0.870484	NA	AC114490.3	protein_coding
ENSG00000243749.1	1.32411	-1.6247	4.29654	-0.378143	0.705325	NA	TMEM35B	protein_coding
ENSG00000163867.17	377.98	0.701528	0.390318	1.79733	0.072284	0.231729	ZMYM6	protein_coding
ENSG00000197056.11	755.366	0.424775	0.358027	1.18643	0.235452	0.479298	ZMYM1	protein_coding
ENSG00000116560.11	14889	-0.0650657	0.287524	-0.226296	0.820971	0.918387	SFPQ	protein_coding
ENSG00000146463.11	2629.65	0.745222	0.416102	1.79096	0.0732998	0.233994	ZMYM4	protein_coding
ENSG00000142687.18	2668.91	0.117636	0.285151	0.41254	0.679944	0.843162	KIAA0319L	protein_coding
ENSG00000116819.8	34.7609	-0.106237	0.834145	-0.127361	0.898655	0.957001	TFAP2E	protein_coding
ENSG00000126067.12	4304.01	-0.398962	0.301091	-1.32505	0.185153	0.414921	PSMB2	protein_coding
ENSG00000134698.11	623.716	0.11017	0.340233	0.323806	0.746085	0.881533	AGO4	protein_coding
ENSG00000092847.12	3657.47	-0.418912	0.278129	-1.50618	0.132021	0.339254	AGO1	protein_coding
ENSG00000126070.20	1997.31	0.48868	0.32732	1.49297	0.135444	0.344656	AGO3	protein_coding
ENSG00000092850.12	6.32553	0.580659	1.73791	0.334114	0.738294	NA	TEKT2	protein_coding
ENSG00000171812.13	29.5872	-1.18277	0.82804	-1.4284	0.153178	0.370441	COL8A2	protein_coding
ENSG00000054116.12	812.837	0.658363	0.360157	1.82799	0.0675509	0.221894	TRAPPC3	protein_coding
ENSG00000116871.15	1064.27	-0.439067	0.39556	-1.10999	0.267004	0.513897	MAP7D1	protein_coding
ENSG00000054118.15	7979.12	0.311424	0.280827	1.10895	0.267451	0.514427	THRAP3	protein_coding
ENSG00000142694.6	132.364	0.142516	0.517073	0.27562	0.78284	0.900529	EVA1B	protein_coding
ENSG00000196182.10	3215.49	-0.711735	0.388893	-1.83016	0.0672263	0.221256	STK40	protein_coding
ENSG00000119535.17	236.036	0.274903	0.429252	0.640424	0.521897	0.73793	CSF3R	protein_coding
ENSG00000163873.10	2.94899	1.41368	3.08917	0.457624	0.647222	NA	GRIK3	protein_coding
ENSG00000163874.11	640.979	-0.759802	0.475374	-1.59833	0.109971	0.303803	ZC3H12A	protein_coding
ENSG00000163875.15	1573.62	-0.290685	0.354174	-0.820739	0.411795	0.654717	MEAF6	protein_coding
ENSG00000163877.11	998.528	-0.248601	0.309376	-0.803556	0.421653	0.662887	SNIP1	protein_coding
ENSG00000163879.11	32.0617	-0.932978	0.940403	-0.992105	0.321146	0.570288	DNALI1	protein_coding
ENSG00000134697.13	2495.68	-0.0894167	0.316065	-0.282906	0.777249	0.897884	GNL2	protein_coding
ENSG00000169218.14	1.02116	-0.888653	4.58119	-0.193979	0.846193	NA	RSPO1	protein_coding
ENSG00000116922.14	760.947	-0.552269	0.330086	-1.6731	0.0943067	0.274513	C1orf109	protein_coding
ENSG00000134690.11	1418.26	-0.0731902	0.326344	-0.224273	0.822545	0.918971	CDCA8	protein_coding
ENSG00000183317.17	24.0533	2.0065	1.02848	1.95095	0.0510634	0.183309	EPHA10	protein_coding
ENSG00000196449.4	720.93	-0.146149	0.327293	-0.446539	0.655208	0.827621	YRDC	protein_coding
ENSG00000188786.10	717.791	0.0414544	0.30576	0.135578	0.892155	0.954658	MTF1	protein_coding
ENSG00000183431.12	3697.18	0.307086	0.346826	0.885418	0.375931	0.621538	SF3A3	protein_coding
ENSG00000183520.12	1082.41	0.0540535	0.395449	0.136689	0.891277	0.954238	UTP11	protein_coding
ENSG00000116954.8	388.707	0.841486	0.457739	1.83835	0.0660103	0.218573	RRAGC	protein_coding
ENSG00000214114.9	336.289	-0.000785873	0.41598	-0.00188921	0.998493	0.999154	MYCBP	protein_coding
ENSG00000274944.4	1.46845	-4.03678	3.8025	-1.06161	0.288412	NA	AL139260.3	protein_coding
ENSG00000174574.16	7090.64	-0.548927	0.302472	-1.8148	0.0695546	0.225966	AKIRIN1	protein_coding
ENSG00000168653.11	2758.66	0.206226	0.312149	0.660666	0.508827	0.729136	NDUFS5	protein_coding
ENSG00000090621.14	5734.14	-0.502374	0.276014	-1.8201	0.0687439	0.224358	PABPC4	protein_coding
ENSG00000163909.8	12.7835	-2.13589	1.27056	-1.68107	0.0927494	0.271585	HEYL	protein_coding
ENSG00000116983.13	1.63673	-3.8136	3.79008	-1.00621	0.314316	NA	HPCAL4	protein_coding
ENSG00000084072.16	457.498	-0.632002	0.349554	-1.80802	0.0706027	0.227976	PPIE	protein_coding
ENSG00000198754.5	21.1114	0.532744	1.20007	0.443928	0.657094	0.828879	OXCT2	protein_coding
ENSG00000043514.16	636.034	0.0287831	0.379389	0.0758671	0.939525	0.975772	TRIT1	protein_coding
ENSG00000116990.11	43.9325	0.0397274	0.718706	0.0552763	0.955918	0.982414	MYCL	protein_coding
ENSG00000131236.17	8144.15	-0.366263	0.287849	-1.27241	0.203226	0.437933	CAP1	protein_coding
ENSG00000131238.17	5442.51	-0.691463	0.397287	-1.74046	0.0817778	0.252084	PPT1	protein_coding
ENSG00000117000.9	2012.44	0.499314	0.378083	1.32065	0.18662	0.416975	RLF	protein_coding
ENSG00000188800.6	1.00239	3.7787	4.75058	0.79542	0.426369	NA	TMCO2	protein_coding
ENSG00000084073.9	3061.18	-0.0937059	0.35818	-0.261617	0.793617	0.90649	ZMPSTE24	protein_coding
ENSG00000187801.15	264.426	-0.855658	0.465585	-1.83781	0.0660903	0.218764	ZFP69B	protein_coding
ENSG00000187815.10	155.666	-0.654179	0.47473	-1.378	0.168203	0.39308	ZFP69	protein_coding
ENSG00000164002.11	590.421	-0.33116	0.360855	-0.917711	0.35877	0.604838	EXO5	protein_coding
ENSG00000117010.17	194.664	-0.387662	0.48903	-0.792715	0.427944	0.667925	ZNF684	protein_coding
ENSG00000117016.10	283.509	-0.0981435	0.429973	-0.228255	0.819448	0.917651	RIMS3	protein_coding
ENSG00000117013.16	9.64237	0.85016	1.42279	0.597529	0.550154	0.759925	KCNQ4	protein_coding
ENSG00000171793.15	3487.8	-0.271801	0.28556	-0.951814	0.341191	0.5889	CTPS1	protein_coding
ENSG00000171790.15	27.3883	0.999551	0.888022	1.12559	0.260338	0.506795	SLFNL1	protein_coding
ENSG00000010803.16	2060.08	-0.318485	0.339466	-0.938193	0.348145	0.594477	SCMH1	protein_coding
ENSG00000204060.7	7.04764	0.852012	1.93189	0.441025	0.659195	NA	FOXO6	protein_coding
ENSG00000127129.10	1.2408	2.09098	4.61045	0.45353	0.650167	NA	EDN2	protein_coding
ENSG00000127124.16	15.5844	-1.17074	1.17802	-0.993822	0.320309	0.569523	HIVEP3	protein_coding
ENSG00000197273.4	8.61463	1.55988	1.62471	0.960093	0.337008	NA	GUCA2A	protein_coding
ENSG00000198815.9	2479.45	0.44499	0.291949	1.52421	0.127457	0.332428	FOXJ3	protein_coding
ENSG00000066185.13	11.0672	1.83312	1.33071	1.37755	0.168341	0.393264	ZMYND12	protein_coding
ENSG00000127125.9	932.349	-0.172954	0.304387	-0.568205	0.569896	0.772419	PPCS	protein_coding
ENSG00000186409.16	48.4224	1.18064	0.71421	1.65306	0.098318	0.282169	CCDC30	protein_coding
ENSG00000171960.11	651.523	-0.63249	0.35357	-1.78887	0.0736363	0.234863	PPIH	protein_coding
ENSG00000164007.10	248.746	-0.921387	0.532777	-1.72941	0.0837365	0.254882	CLDN19	protein_coding
ENSG00000117385.15	2720.33	-0.660999	0.345886	-1.91103	0.0560008	0.194996	P3H1	protein_coding
ENSG00000164008.16	188.179	0.31699	0.527493	0.600936	0.547883	0.758067	C1orf50	protein_coding
ENSG00000283580.3	0.130182	-1.33593	7.06662	-0.189049	0.850055	NA	AC098484.3	protein_coding
ENSG00000274386.5	19.945	0.239867	0.97402	0.246265	0.805477	0.911674	TMEM269	protein_coding
ENSG00000177868.12	302.338	-0.424828	0.379522	-1.11938	0.26298	0.509614	SVBP	protein_coding
ENSG00000164010.15	114.127	-0.068246	0.489995	-0.139279	0.88923	0.953138	ERMAP	protein_coding
ENSG00000164011.18	249.401	-0.192551	0.376999	-0.510747	0.609528	0.79981	ZNF691	protein_coding
ENSG00000243710.7	13.5465	-0.323351	1.39761	-0.231359	0.817036	0.916884	CFAP57	protein_coding
ENSG00000179178.11	0.734771	2.55348	4.60572	0.554414	0.579296	NA	TMEM125	protein_coding
ENSG00000066056.14	10.7419	-0.916694	1.38851	-0.6602	0.509125	0.729136	TIE1	protein_coding
ENSG00000117400.17	8.73571	0.0572322	1.78828	0.0320041	0.974469	NA	MPL	protein_coding
ENSG00000117399.14	2791.42	-0.00781821	0.397004	-0.019693	0.984288	0.99329	CDC20	protein_coding
ENSG00000066322.15	1372.88	0.453975	0.36004	1.2609	0.207344	0.443305	ELOVL1	protein_coding
ENSG00000159479.17	1334.2	0.228962	0.31155	0.734913	0.462393	0.694753	MED8	protein_coding
ENSG00000198198.16	1867.4	0.498587	0.370077	1.34725	0.177899	0.404948	SZT2	protein_coding
ENSG00000178922.16	0.937365	1.94688	4.47119	0.435428	0.663252	NA	HYI	protein_coding
ENSG00000142949.17	9796.08	-0.0561106	0.41101	-0.136519	0.891411	0.95424	PTPRF	protein_coding
ENSG00000126091.20	371.508	-0.151664	0.404938	-0.374538	0.708004	0.860133	ST3GAL3	protein_coding
ENSG00000117407.17	8.8364	-2.67782	1.69331	-1.58141	0.113784	NA	ARTN	protein_coding
ENSG00000117408.11	876.337	0.620227	0.423917	1.46308	0.143444	0.35667	IPO13	protein_coding
ENSG00000117410.14	2179.98	-0.247983	0.349937	-0.708651	0.478541	0.706824	ATP6V0B	protein_coding
ENSG00000117411.16	1922.03	-0.553403	0.385189	-1.4367	0.150802	0.366546	B4GALT2	protein_coding
ENSG00000159214.13	59.8548	-0.628735	0.674705	-0.931866	0.351406	0.597486	CCDC24	protein_coding
ENSG00000196517.11	455.658	0.669956	0.444849	1.50603	0.13206	0.339297	SLC6A9	protein_coding
ENSG00000171872.4	1.51014	-1.1356	3.99167	-0.284492	0.776033	NA	KLF17	protein_coding
ENSG00000283039.1	1.43672	2.3804	4.12111	0.57761	0.563528	NA	KLF18	protein_coding
ENSG00000178028.14	1053.45	-0.0786893	0.349069	-0.225426	0.821648	0.91864	DMAP1	protein_coding
ENSG00000117419.15	1032.87	-0.446947	0.391318	-1.14216	0.253388	0.499754	ERI3	protein_coding
ENSG00000198520.12	13.4743	-0.608558	1.24746	-0.487838	0.625664	0.810319	ARMH1	protein_coding
ENSG00000142945.13	2373.56	-0.544623	0.31001	-1.75679	0.0789532	0.246276	KIF2C	protein_coding
ENSG00000142937.12	38907.5	-0.437432	0.378155	-1.15675	0.247373	0.492619	RPS8	protein_coding
ENSG00000142959.5	67.9179	-0.920058	0.642531	-1.43193	0.152164	0.368761	BEST4	protein_coding
ENSG00000188396.3	5.70313	-0.0910631	2.17107	-0.0419439	0.966543	NA	TCTEX1D4	protein_coding
ENSG00000222009.8	721.036	0.428091	0.378792	1.13015	0.258414	0.504892	BTBD19	protein_coding
ENSG00000117425.14	104.369	-0.792225	0.563183	-1.40669	0.159519	0.380436	PTCH2	protein_coding
ENSG00000070785.16	538.566	0.231561	0.355873	0.650685	0.51525	0.732788	EIF2B3	protein_coding
ENSG00000126107.15	1055.78	-0.517113	0.362397	-1.42692	0.153602	0.371238	HECTD3	protein_coding
ENSG00000162415.7	1290.11	0.38294	0.30857	1.24102	0.2146	0.45232	ZSWIM5	protein_coding
ENSG00000132781.17	337.82	-0.735621	0.41519	-1.77177	0.0764325	0.240917	MUTYH	protein_coding
ENSG00000070759.17	354.63	0.398004	0.368659	1.0796	0.280321	0.527988	TESK2	protein_coding
ENSG00000280670.3	191.115	-0.798366	0.441604	-1.80788	0.0706255	0.227993	CCDC163	protein_coding
ENSG00000117450.14	17420.9	-0.392767	0.328508	-1.19561	0.23185	0.475017	PRDX1	protein_coding
ENSG00000117448.13	2139.85	-0.35639	0.360099	-0.989702	0.32232	0.571445	AKR1A1	protein_coding
ENSG00000132780.17	8307.68	-0.570339	0.296541	-1.92331	0.0544412	0.191169	NASP	protein_coding
ENSG00000159596.7	1211.67	0.176394	0.317235	0.556035	0.578187	0.778072	TMEM69	protein_coding
ENSG00000197429.10	278.313	0.436009	0.387532	1.12509	0.260549	0.506896	IPP	protein_coding
ENSG00000085998.14	1670.02	-0.0359796	0.406006	-0.0886185	0.929385	0.97101	POMGNT1	protein_coding
ENSG00000132128.16	2730.82	0.503461	0.314365	1.60152	0.109262	0.302837	LRRC41	protein_coding
ENSG00000173660.12	3512.62	-0.217064	0.321204	-0.675783	0.499179	0.721848	UQCRH	protein_coding
ENSG00000117481.10	888.287	-0.0997265	0.311114	-0.320547	0.748554	0.882627	NSUN4	protein_coding
ENSG00000117480.16	140.951	-0.925241	0.528456	-1.75084	0.0799741	0.248238	FAAH	protein_coding
ENSG00000197587.10	1.09291	-0.500124	4.89217	-0.102229	0.918575	NA	DMBX1	protein_coding
ENSG00000162456.9	2.5351	4.61615	3.49944	1.31911	0.187133	NA	KNCN	protein_coding
ENSG00000079277.20	997.252	0.0100905	0.322817	0.0312577	0.975064	0.989809	MKNK1	protein_coding
ENSG00000142961.14	113.068	-0.433704	0.552625	-0.784807	0.432567	0.671234	MOB3C	protein_coding
ENSG00000123472.12	1078.35	-0.0703812	0.391444	-0.179799	0.857311	0.93661	ATPAF1	protein_coding
ENSG00000186118.8	1.42592	-0.851852	4.07874	-0.208852	0.834564	NA	TEX38	protein_coding
ENSG00000159658.11	1436.16	0.226924	0.346391	0.655111	0.512397	0.730947	EFCAB14	protein_coding
ENSG00000142973.13	5.0365	0.44687	2.2467	0.198901	0.84234	NA	CYP4B1	protein_coding
ENSG00000187048.13	2.22368	-0.0137751	3.28033	-0.00419932	0.996649	NA	CYP4A11	protein_coding
ENSG00000186377.8	4.08787	1.87686	2.66499	0.704263	0.481269	NA	CYP4X1	protein_coding
ENSG00000186160.5	1.93345	1.66841	3.65255	0.456779	0.64783	NA	CYP4Z1	protein_coding
ENSG00000162365.12	2.08555	-0.878247	3.53607	-0.248368	0.80385	NA	CYP4A22	protein_coding
ENSG00000162366.8	13.0091	-3.62391	1.85528	-1.9533	0.0507844	0.182857	PDZK1IP1	protein_coding
ENSG00000162367.11	10.3783	-2.33554	1.44983	-1.61091	0.1072	0.299435	TAL1	protein_coding
ENSG00000162368.13	4723.12	0.231879	0.308347	0.752007	0.452047	0.687631	CMPK1	protein_coding
ENSG00000186790.6	0.571254	0.573989	6.25371	0.0917838	0.92687	NA	FOXE3	protein_coding
ENSG00000132122.12	174.302	-0.0708165	0.429551	-0.164862	0.869053	0.942179	SPATA6	protein_coding
ENSG00000186094.17	7.08438	-1.93963	1.94968	-0.994845	0.319812	NA	AGBL4	protein_coding
ENSG00000162373.13	2.15672	0.942655	3.22322	0.292457	0.769937	NA	BEND5	protein_coding
ENSG00000162374.17	3.6931	0.601943	2.86548	0.210067	0.833615	NA	ELAVL4	protein_coding
ENSG00000142700.12	12.2099	1.96883	1.28871	1.52775	0.126574	0.330959	DMRTA2	protein_coding
ENSG00000185104.20	1300.44	0.345579	0.313874	1.10101	0.270891	0.518143	FAF1	protein_coding
ENSG00000204006.9	1.40847	-0.984536	4.09655	-0.240333	0.810072	NA	C1orf185	protein_coding
ENSG00000123091.5	1653.68	0.00419417	0.318361	0.0131743	0.989489	0.995418	RNF11	protein_coding
ENSG00000085832.17	1944.97	0.71517	0.436369	1.63891	0.101232	0.28784	EPS15	protein_coding
ENSG00000117859.19	3718.76	-0.159772	0.345405	-0.462563	0.643677	0.82037	OSBPL9	protein_coding
ENSG00000169213.7	521.909	0.351368	0.400238	0.877899	0.379998	0.624649	RAB3B	protein_coding
ENSG00000117862.12	466.04	-0.720508	0.428322	-1.68217	0.0925366	0.271163	TXNDC12	protein_coding
ENSG00000198841.3	144.799	-0.307148	0.491648	-0.62473	0.532148	0.745432	KTI12	protein_coding
ENSG00000134717.18	2113.47	-0.229914	0.349312	-0.658192	0.510415	0.73008	BTF3L4	protein_coding
ENSG00000157077.14	1478.03	-0.290499	0.343798	-0.844968	0.398128	0.641592	ZFYVE9	protein_coding
ENSG00000154222.14	1188.34	-0.00953121	0.396066	-0.0240647	0.980801	0.992034	CC2D1B	protein_coding
ENSG00000134748.13	1889.29	-0.293236	0.374406	-0.783203	0.433508	0.672094	PRPF38A	protein_coding
ENSG00000116157.6	181.938	-0.654876	0.51215	-1.27868	0.20101	0.434701	GPX7	protein_coding
ENSG00000182183.15	1.25775	3.34752	4.65258	0.719498	0.471834	NA	SHISAL2A	protein_coding
ENSG00000162377.6	1462.04	-0.474479	0.310241	-1.52939	0.126168	0.330338	COA7	protein_coding
ENSG00000203995.9	7.16171	1.06396	2.35441	0.451901	0.65134	NA	ZYG11A	protein_coding
ENSG00000121310.17	880.346	0.224448	0.337237	0.66555	0.505699	0.726927	ECHDC2	protein_coding
ENSG00000116171.18	1227.77	0.371358	0.418533	0.887284	0.374926	0.620674	SCP2	protein_coding
ENSG00000174348.13	1.48112	2.20006	3.91944	0.561318	0.574581	NA	PODN	protein_coding
ENSG00000162383.12	13.9554	-2.59278	1.49849	-1.73026	0.0835843	0.254655	SLC1A7	protein_coding
ENSG00000162384.14	553.591	-0.165824	0.322051	-0.514898	0.606624	0.798027	CZIB	protein_coding
ENSG00000143006.7	1.53037	-1.08587	3.94309	-0.275385	0.78302	NA	DMRTB1	protein_coding
ENSG00000174332.5	4.86372	-3.34823	2.3155	-1.44601	0.148175	NA	GLIS1	protein_coding
ENSG00000058804.12	3532.91	0.161386	0.33722	0.478577	0.63224	0.814058	NDC1	protein_coding
ENSG00000058799.15	585.877	0.344255	0.345712	0.995785	0.319355	0.569165	YIPF1	protein_coding
ENSG00000211452.10	55.8388	-0.855184	0.767121	-1.1148	0.264938	0.511793	DIO1	protein_coding
ENSG00000081870.11	697.539	-0.177301	0.485976	-0.364835	0.715234	0.864872	HSPB11	protein_coding
ENSG00000203985.11	488.74	0.780565	0.561036	1.39129	0.164137	0.38731	LDLRAD1	protein_coding
ENSG00000116209.11	3002.71	0.528133	0.351725	1.50155	0.133213	0.341232	TMEM59	protein_coding
ENSG00000116205.14	385.733	-0.243469	0.338753	-0.718721	0.472313	0.702018	TCEANC2	protein_coding
ENSG00000256407.2	0.773806	4.18138	4.85632	0.861018	0.389228	NA	AL357673.1	protein_coding
ENSG00000157211.11	0.236866	0.228511	7.05224	0.0324026	0.974151	NA	CDCP2	protein_coding
ENSG00000215883.10	271.42	-0.519844	0.367662	-1.41392	0.157386	0.377182	CYB5RL	protein_coding
ENSG00000157216.15	1066.03	0.282787	0.340106	0.831467	0.40571	0.648832	SSBP3	protein_coding
ENSG00000184313.20	1.79145	2.7274	3.60621	0.756305	0.449466	NA	MROH7	protein_coding
ENSG00000243725.7	80.2917	0.358323	0.595434	0.601785	0.547318	0.757711	TTC4	protein_coding
ENSG00000162396.6	220.405	-0.104647	0.446246	-0.234505	0.814593	0.915083	PARS2	protein_coding
ENSG00000006555.11	2.5852	-0.782634	2.57353	-0.304109	0.761044	NA	TTC22	protein_coding
ENSG00000162398.11	0.591477	0.649901	5.65862	0.114851	0.908563	NA	LEXM	protein_coding
ENSG00000116133.13	27298.1	0.579523	0.335796	1.72582	0.0843806	0.256009	DHCR24	protein_coding
ENSG00000143001.5	0.114971	1.51136	7.06302	0.213981	0.830562	NA	TMEM61	protein_coding
ENSG00000162399.8	1.03446	-0.247762	4.55638	-0.054377	0.956635	NA	BSND	protein_coding
ENSG00000162402.14	6331.75	-0.0331032	0.327573	-0.101056	0.919506	0.966963	USP24	protein_coding
ENSG00000284686.1	25.3986	1.53718	1.0595	1.45085	0.146822	0.360936	AC119674.2	protein_coding
ENSG00000162407.9	1742.94	-0.372225	0.295176	-1.26103	0.207299	0.443298	PLPP3	protein_coding
ENSG00000021852.13	52.414	-0.740957	0.709229	-1.04474	0.296145	0.544804	C8B	protein_coding
ENSG00000173406.15	18.3682	0.896714	1.07782	0.831973	0.405424	0.648533	DAB1	protein_coding
ENSG00000184292.6	2.51934	1.3798	2.60859	0.528943	0.596845	NA	TACSTD2	protein_coding
ENSG00000172456.17	298.979	-0.0920866	0.363735	-0.253169	0.800138	0.908562	FGGY	protein_coding
ENSG00000134709.11	2143.84	-0.553423	0.323238	-1.71212	0.0868746	0.260725	HOOK1	protein_coding
ENSG00000162598.13	2.29942	-0.726933	3.44139	-0.211233	0.832706	NA	C1orf87	protein_coding
ENSG00000162599.16	2190.19	0.238501	0.299006	0.797647	0.425075	0.665444	NFIA	protein_coding
ENSG00000162604.12	922.59	0.444686	0.326049	1.36386	0.172611	0.398016	TM2D1	protein_coding
ENSG00000240563.2	1.61901	0.433557	3.93759	0.110107	0.912324	NA	L1TD1	protein_coding
ENSG00000132854.19	1230.84	-0.627863	0.379035	-1.65648	0.097625	0.280856	KANK4	protein_coding
ENSG00000116641.17	5090.23	0.559089	0.390528	1.43162	0.152252	0.368928	DOCK7	protein_coding
ENSG00000132855.4	13.5816	-0.288327	1.35505	-0.212779	0.831499	0.923509	ANGPTL3	protein_coding
ENSG00000125703.15	385.054	-0.366347	0.386836	-0.947036	0.343621	0.591001	ATG4C	protein_coding
ENSG00000187140.5	0.203345	-2.20785	7.00069	-0.315376	0.752476	NA	FOXD3	protein_coding
ENSG00000088035.17	253.218	0.668749	0.443888	1.50657	0.13192	0.339175	ALG6	protein_coding
ENSG00000142856.16	591.338	0.0800366	0.418744	0.191135	0.84842	0.932847	ITGB3BP	protein_coding
ENSG00000203965.13	135.481	-0.289192	0.518849	-0.557373	0.577273	0.777482	EFCAB7	protein_coding
ENSG00000177414.13	1.08543	0.550161	4.54073	0.121161	0.903563	NA	UBE2U	protein_coding
ENSG00000158966.15	33.6656	-0.356339	0.825865	-0.431473	0.666124	0.834919	CACHD1	protein_coding
ENSG00000162434.12	4197.19	-0.130406	0.308556	-0.422632	0.672564	0.838845	JAK1	protein_coding
ENSG00000162433.15	5471.36	-0.539659	0.376318	-1.43405	0.151558	0.367564	AK4	protein_coding
ENSG00000116675.16	266.161	-0.190902	0.401862	-0.475044	0.634756	0.8158	DNAJC6	protein_coding
ENSG00000213625.9	2985.83	-0.302417	0.316505	-0.955488	0.339331	0.587115	LEPROT	protein_coding
ENSG00000116678.19	91.3787	0.305316	0.650448	0.469393	0.638789	0.817773	LEPR	protein_coding
ENSG00000184588.18	4.51332	-2.15663	2.86693	-0.752244	0.451904	NA	PDE4B	protein_coding
ENSG00000118473.22	8.59427	3.97052	2.08331	1.90587	0.0566674	NA	SGIP1	protein_coding
ENSG00000152760.10	1.63702	-0.569816	4.24576	-0.134208	0.893238	NA	TCTEX1D1	protein_coding
ENSG00000172410.4	0.507255	1.83865	6.95952	0.264192	0.791632	NA	INSL5	protein_coding
ENSG00000152763.17	44.1144	-0.427611	0.773057	-0.553143	0.580166	0.779315	WDR78	protein_coding
ENSG00000198160.14	2311.88	0.572502	0.382856	1.49535	0.134824	0.343682	MIER1	protein_coding
ENSG00000203963.11	2.39501	-0.237052	3.39232	-0.0698789	0.94429	NA	C1orf141	protein_coding
ENSG00000162594.15	3.4807	-1.75084	2.69923	-0.648643	0.516569	NA	IL23R	protein_coding
ENSG00000081985.11	12.1905	0.629517	2.37177	0.26542	0.790686	0.904875	IL12RB2	protein_coding
ENSG00000142864.14	19509.9	-0.294603	0.27959	-1.0537	0.292022	0.540409	SERBP1	protein_coding
ENSG00000172380.6	89.8233	-0.0855629	0.660402	-0.129562	0.896913	0.956567	GNG12	protein_coding
ENSG00000162595.6	1.00593	-0.617036	5.06321	-0.121867	0.903005	NA	DIRAS3	protein_coding
ENSG00000116729.14	5.39696	0.681246	2.37585	0.286738	0.774313	NA	WLS	protein_coding
ENSG00000116745.7	1.83573	-0.973675	3.5777	-0.272151	0.785506	NA	RPE65	protein_coding
ENSG00000033122.19	15.5586	0.140849	2.26197	0.0622685	0.950349	0.979945	LRRC7	protein_coding
ENSG00000066557.6	1092.96	0.343932	0.351504	0.97846	0.327847	0.576919	LRRC40	protein_coding
ENSG00000116754.13	6855.87	0.424044	0.342347	1.23864	0.215479	0.453395	SRSF11	protein_coding
ENSG00000118454.13	1178.83	0.435329	0.375864	1.15821	0.246779	0.492006	ANKRD13C	protein_coding
ENSG00000197568.14	39.7606	-0.299174	0.740449	-0.404044	0.68618	0.846755	HHLA3	protein_coding
ENSG00000116761.11	421.386	-0.82375	0.428162	-1.92392	0.0543642	0.191058	CTH	protein_coding
ENSG00000050628.20	7.43287	0.839782	2.51224	0.334276	0.738171	NA	PTGER3	protein_coding
ENSG00000132485.14	3873.76	0.0129458	0.369965	0.0349919	0.972086	0.988758	ZRANB2	protein_coding
ENSG00000172260.15	7.73168	-0.734204	1.79236	-0.409629	0.682078	NA	NEGR1	protein_coding
ENSG00000162620.16	40.4034	-0.0597093	0.721254	-0.0827854	0.934022	0.973662	LRRIQ3	protein_coding
ENSG00000254685.6	157.851	0.538189	0.545571	0.986469	0.323903	0.573008	FPGT	protein_coding
ENSG00000259030.7	4.70762	0.278704	2.03851	0.136719	0.891253	NA	FPGT-TNNI3K	protein_coding
ENSG00000116783.15	0.263228	-2.34052	6.99319	-0.334686	0.737862	NA	TNNI3K	protein_coding
ENSG00000162621.6	0.957589	1.99736	4.48027	0.445812	0.655733	NA	LRRC53	protein_coding
ENSG00000178965.14	11.9469	0.919546	1.66569	0.552051	0.580913	0.779818	ERICH3	protein_coding
ENSG00000116791.14	2855.85	-0.476045	0.387155	-1.2296	0.218847	0.457443	CRYZ	protein_coding
ENSG00000162623.16	1516.29	-0.304594	0.384979	-0.791196	0.42883	0.668498	TYW3	protein_coding
ENSG00000162624.14	1.08606	-1.34939	4.24249	-0.318065	0.750436	NA	LHX8	protein_coding
ENSG00000117054.13	1289.32	-0.151517	0.394427	-0.384144	0.700872	0.856415	ACADM	protein_coding
ENSG00000137955.16	6385	-0.247794	0.335564	-0.738441	0.460247	0.693201	RABGGTB	protein_coding
ENSG00000057468.7	34.0019	0.315124	0.753983	0.417945	0.675987	0.840534	MSH4	protein_coding
ENSG00000154007.6	0.859092	1.615	5.34095	0.30238	0.762362	NA	ASB17	protein_coding
ENSG00000184005.11	4.52423	1.71619	2.77538	0.618363	0.536336	NA	ST6GALNAC3	protein_coding
ENSG00000117069.15	1.89968	1.88244	3.46837	0.542745	0.587305	NA	ST6GALNAC5	protein_coding
ENSG00000142892.15	968.86	0.0187592	0.419066	0.0447644	0.964295	0.985691	PIGK	protein_coding
ENSG00000154027.19	5.67349	2.47061	2.47459	0.998389	0.318091	NA	AK5	protein_coding
ENSG00000036549.13	2069.67	0.622131	0.384991	1.61596	0.106102	0.297595	AC118549.1	protein_coding
ENSG00000077254.14	2259.65	0.310472	0.31237	0.993924	0.32026	0.569523	USP33	protein_coding
ENSG00000180488.15	744.002	0.520346	0.38727	1.34363	0.179069	0.406566	MIGA1	protein_coding
ENSG00000162614.18	75.5519	-0.201249	0.595838	-0.337757	0.735546	0.876517	NEXN	protein_coding
ENSG00000162613.16	6900.85	0.262909	0.295862	0.888622	0.374206	0.620058	FUBP1	protein_coding
ENSG00000137960.6	978.833	0.0380948	0.339943	0.112062	0.910774	0.962418	GIPC2	protein_coding
ENSG00000122420.10	2.21457	0.596441	3.35911	0.177559	0.859069	NA	PTGFR	protein_coding
ENSG00000137959.16	6.6456	0.00169122	1.92433	0.000878861	0.999299	NA	IFI44L	protein_coding
ENSG00000137965.11	2.43689	0.611097	2.89369	0.211183	0.832744	NA	IFI44	protein_coding
ENSG00000162618.14	2.09033	-2.97286	3.48681	-0.852602	0.39388	NA	ADGRL4	protein_coding
ENSG00000137941.17	33.2924	-1.31218	0.925495	-1.41782	0.156244	0.375398	TTLL7	protein_coding
ENSG00000142875.19	396.634	0.125582	0.421225	0.298134	0.765601	0.892194	PRKACB	protein_coding
ENSG00000203943.8	6.32045	2.97599	2.03079	1.46543	0.142803	NA	SAMD13	protein_coding
ENSG00000137976.7	0.318315	-0.798562	6.99649	-0.114138	0.909129	NA	DNASE2B	protein_coding
ENSG00000117133.11	896.902	0.369898	0.375896	0.984042	0.325095	0.57413	RPF1	protein_coding
ENSG00000174021.11	667.428	-0.486775	0.411265	-1.1836	0.23657	0.480728	GNG5	protein_coding
ENSG00000122432.17	59.7081	0.037818	0.66449	0.0569128	0.954615	0.981791	SPATA1	protein_coding
ENSG00000171517.6	2.74767	0.470617	3.2356	0.14545	0.884356	NA	LPAR3	protein_coding
ENSG00000153898.13	3.2345	3.24008	2.89944	1.11748	0.263787	NA	MCOLN2	protein_coding
ENSG00000055732.13	66.7961	0.55302	1.06166	0.520903	0.602434	0.795069	MCOLN3	protein_coding
ENSG00000097096.9	464.188	0.143306	0.373133	0.384061	0.700933	0.856415	SYDE2	protein_coding
ENSG00000162642.14	629.791	0.159951	0.348991	0.458323	0.64672	0.822786	C1orf52	protein_coding
ENSG00000153904.20	2190.07	0.0524571	0.353381	0.148443	0.881993	0.949003	DDAH1	protein_coding
ENSG00000117174.11	945.955	0.365811	0.378203	0.967233	0.333427	0.581601	ZNHIT6	protein_coding
ENSG00000171502.15	47.2703	-0.222956	0.733843	-0.30382	0.761265	0.890143	COL24A1	protein_coding
ENSG00000137975.8	21.5301	0.273034	2.0261	0.134759	0.892803	0.95473	CLCA2	protein_coding
ENSG00000016490.15	4.82365	-0.517454	2.73434	-0.189243	0.849903	NA	CLCA1	protein_coding
ENSG00000016602.9	5.63921	-3.0636	2.68135	-1.14256	0.253222	NA	CLCA4	protein_coding
ENSG00000097033.14	3679.59	0.207675	0.37077	0.560119	0.575399	0.776288	SH3GLB1	protein_coding
ENSG00000183291.17	4114.13	-0.283538	0.316339	-0.896308	0.370088	0.615779	SELENOF	protein_coding
ENSG00000153936.17	7576.74	-0.158003	0.342014	-0.461978	0.644097	0.820718	HS2ST1	protein_coding
ENSG00000267561.2	34.0704	0.315475	0.77788	0.405557	0.685068	0.84603	AC093155.3	protein_coding
ENSG00000065243.20	3172.78	0.58102	0.362443	1.60307	0.10892	0.302515	PKN2	protein_coding
ENSG00000137947.12	917.604	0.547148	0.358883	1.52458	0.127363	0.332428	GTF2B	protein_coding
ENSG00000137944.18	649.898	0.430196	0.431904	0.996044	0.319229	0.569041	KYAT3	protein_coding
ENSG00000213516.10	881.574	0.352442	0.354231	0.994948	0.319761	0.569523	RBMXL1	protein_coding
ENSG00000117226.12	2.81785	-0.683368	2.5772	-0.26516	0.790886	NA	GBP3	protein_coding
ENSG00000213512.3	0.827518	-1.24985	4.97899	-0.251024	0.801795	NA	GBP7	protein_coding
ENSG00000162654.9	3.82771	-0.909735	2.5257	-0.360191	0.718704	NA	GBP4	protein_coding
ENSG00000154451.14	2.12559	0.232572	3.41	0.0682029	0.945624	NA	GBP5	protein_coding
ENSG00000183347.14	3.77726	1.91358	2.76508	0.692052	0.488905	NA	GBP6	protein_coding
ENSG00000197147.13	895.555	-0.352764	0.361277	-0.976436	0.328848	0.577646	LRRC8B	protein_coding
ENSG00000171488.15	44.0257	-0.170422	0.751945	-0.226641	0.820703	0.918361	LRRC8C	protein_coding
ENSG00000171492.14	1386.41	0.556423	0.404231	1.3765	0.168668	0.3937	LRRC8D	protein_coding
ENSG00000162664.17	2013.39	0.613754	0.349325	1.75697	0.0789232	0.24626	ZNF326	protein_coding
ENSG00000143032.8	0.588704	0.855255	6.15309	0.138996	0.889453	NA	BARHL2	protein_coding
ENSG00000122482.21	3596.75	0.427477	0.406808	1.05081	0.293347	0.541993	ZNF644	protein_coding
ENSG00000162669.16	80.541	0.454553	0.698439	0.650813	0.515167	0.732777	HFM1	protein_coding
ENSG00000097046.13	1518.02	-0.164808	0.32126	-0.513004	0.607949	0.798789	CDC7	protein_coding
ENSG00000137948.18	6.50314	1.14425	2.58016	0.443481	0.657418	NA	BRDT	protein_coding
ENSG00000172031.7	1.74426	-1.75408	3.04014	-0.576973	0.563958	NA	EPHX4	protein_coding
ENSG00000230667.5	3.77485	0.517783	2.13742	0.242247	0.808589	NA	SETSIP	protein_coding
ENSG00000203910.9	1.05551	1.23274	4.88428	0.252389	0.80074	NA	C1orf146	protein_coding
ENSG00000174842.17	606.235	-0.0203656	0.424965	-0.047923	0.961778	0.984777	GLMN	protein_coding
ENSG00000122406.13	22690	0.128644	0.327686	0.392584	0.694627	0.852581	RPL5	protein_coding
ENSG00000143033.18	2065.19	0.0906037	0.336062	0.269604	0.787465	0.90322	MTF2	protein_coding
ENSG00000117500.13	7096.98	-0.242905	0.339455	-0.715573	0.474255	0.703863	TMED5	protein_coding
ENSG00000122483.17	850.935	0.371627	0.338498	1.09787	0.272261	0.519558	CCDC18	protein_coding
ENSG00000117505.13	3889.64	0.171706	0.295603	0.580869	0.561329	0.766818	DR1	protein_coding
ENSG00000137942.16	2744.9	0.329554	0.339388	0.971025	0.331536	0.580188	FNBP1L	protein_coding
ENSG00000067334.14	1746.92	0.256564	0.912761	0.281086	0.778645	0.898619	DNTTIP2	protein_coding
ENSG00000023909.10	2184.3	0.148636	0.30058	0.494497	0.620955	0.806815	GCLM	protein_coding
ENSG00000198691.13	103.264	-0.558794	0.527035	-1.06026	0.289026	0.537261	ABCA4	protein_coding
ENSG00000117528.13	5610.81	0.706412	0.370139	1.90851	0.0563259	0.195538	ABCD3	protein_coding
ENSG00000117525.14	514.735	-0.705759	0.360261	-1.95902	0.0501104	0.181399	F3	protein_coding
ENSG00000172339.10	401.307	0.301326	0.358134	0.841378	0.400136	0.643835	ALG14	protein_coding
ENSG00000152078.10	558.252	-0.646212	0.434369	-1.4877	0.13683	0.346484	TMEM56	protein_coding
ENSG00000271092.5	30.7406	0.019226	0.792738	0.0242526	0.980651	0.992034	TMEM56-RWDD3	protein_coding
ENSG00000122481.17	120.256	0.673725	0.496717	1.35636	0.174986	0.400784	RWDD3	protein_coding
ENSG00000117569.18	1101.03	0.619603	0.341346	1.81518	0.0694969	0.225884	PTBP2	protein_coding
ENSG00000188641.13	25.6482	-1.07384	1.00773	-1.0656	0.286606	0.534922	DPYD	protein_coding
ENSG00000162627.17	655.752	-0.277744	0.392836	-0.707023	0.479552	0.707736	SNX7	protein_coding
ENSG00000117598.12	1.72485	-0.412756	3.88596	-0.106217	0.91541	NA	PLPPR5	protein_coding
ENSG00000117600.12	4.69748	-3.07971	2.82965	-1.08837	0.276431	NA	PLPPR4	protein_coding
ENSG00000099260.11	352.168	0.498934	0.484295	1.03023	0.302903	0.551513	PALMD	protein_coding
ENSG00000156869.13	412.129	-0.436485	0.432471	-1.00928	0.312839	0.561938	FRRS1	protein_coding
ENSG00000162688.17	1951.25	0.24734	0.374066	0.66122	0.508471	0.72899	AGL	protein_coding
ENSG00000117620.15	1306.11	0.180751	0.3211	0.562911	0.573495	0.774838	SLC35A3	protein_coding
ENSG00000283761.1	54.7802	0.529067	0.676798	0.781719	0.434379	0.67293	AC118553.2	protein_coding
ENSG00000156875.14	197.187	-0.333354	0.476169	-0.700075	0.48388	0.710555	MFSD14A	protein_coding
ENSG00000156876.10	978.862	-0.548163	0.396425	-1.38276	0.166737	0.391051	SASS6	protein_coding
ENSG00000122435.10	683.039	0.385246	0.355819	1.0827	0.27894	0.526568	TRMT13	protein_coding
ENSG00000122477.12	8.47595	0.551071	1.4474	0.380732	0.703402	NA	LRRC39	protein_coding
ENSG00000137992.14	694.406	0.645329	0.405689	1.5907	0.111678	0.306623	DBT	protein_coding
ENSG00000079335.20	368.219	-0.23405	0.357038	-0.655533	0.512125	0.730913	CDC14A	protein_coding
ENSG00000181656.7	0.785518	4.39772	5.17916	0.849118	0.395815	NA	GPR88	protein_coding
ENSG00000162692.12	1.62945	-3.10099	3.39878	-0.912383	0.361567	NA	VCAM1	protein_coding
ENSG00000162694.14	765.004	-0.305593	0.413648	-0.738775	0.460044	0.693201	EXTL2	protein_coding
ENSG00000162695.12	2694.23	0.43584	0.353689	1.23227	0.217849	0.456088	SLC30A7	protein_coding
ENSG00000170989.9	2.5604	-2.08703	3.3604	-0.621067	0.534556	NA	S1PR1	protein_coding
ENSG00000118733.16	1.8894	0.794344	3.66765	0.216581	0.828535	NA	OLFM3	protein_coding
ENSG00000060718.22	12.0648	3.07607	1.96126	1.56842	0.116783	0.315177	COL11A1	protein_coding
ENSG00000185946.16	594.665	0.469229	0.386437	1.21425	0.224653	0.465523	RNPC3	protein_coding
ENSG00000240038.6	14.7889	0.210285	1.16996	0.179737	0.857359	0.93661	AMY2B	protein_coding
ENSG00000162631.18	4.6231	1.0395	2.75054	0.377925	0.705486	NA	NTNG1	protein_coding
ENSG00000196427.13	1.4057	-0.90086	4.05462	-0.222181	0.824173	NA	NBPF4	protein_coding
ENSG00000186086.18	0.964163	-1.02713	4.48049	-0.229246	0.818678	NA	NBPF6	protein_coding
ENSG00000162636.16	367.615	-0.267198	0.420885	-0.634846	0.525529	0.74049	FAM102B	protein_coding
ENSG00000162639.16	1.31178	-0.0575487	4.2191	-0.0136401	0.989117	NA	HENMT1	protein_coding
ENSG00000134186.12	2572.55	0.211338	0.317178	0.666307	0.505215	0.726459	PRPF38B	protein_coding
ENSG00000143107.9	4.05766	2.66347	2.59708	1.02556	0.305099	NA	FNDC7	protein_coding
ENSG00000162641.19	1.88803	3.25916	3.42602	0.951297	0.341454	NA	AKNAD1	protein_coding
ENSG00000121940.15	2073.01	-0.180873	0.291728	-0.620005	0.535255	0.747704	CLCC1	protein_coding
ENSG00000197780.9	785.807	0.204974	0.332134	0.617143	0.537141	0.749314	TAF13	protein_coding
ENSG00000215717.6	734.684	0.222146	0.357859	0.620764	0.534755	0.747378	TMEM167B	protein_coding
ENSG00000179902.12	0.385359	3.16979	6.96711	0.454965	0.649135	NA	C1orf194	protein_coding
ENSG00000116299.17	24.9822	1.955	1.17355	1.66589	0.0957353	0.27743	KIAA1324	protein_coding
ENSG00000143126.8	2416.77	-0.796445	0.420282	-1.89502	0.0580894	0.19978	CELSR2	protein_coding
ENSG00000221986.7	47.4949	0.80904	0.737242	1.09739	0.272472	0.519652	MYBPHL	protein_coding
ENSG00000134243.12	7263.52	0.0160887	0.334651	0.0480759	0.961656	0.984777	SORT1	protein_coding
ENSG00000143106.13	2900.3	-0.449091	0.304671	-1.47402	0.140477	0.35226	PSMA5	protein_coding
ENSG00000143028.9	60.0442	0.540402	0.648304	0.833563	0.404527	0.647905	SYPL2	protein_coding
ENSG00000174151.14	354.217	0.479791	0.35794	1.34042	0.180108	0.407896	CYB561D1	protein_coding
ENSG00000181754.7	145.688	0.102574	0.450904	0.227486	0.820046	0.917954	AMIGO1	protein_coding
ENSG00000156097.12	3.90778	-0.649935	2.18325	-0.297691	0.765939	NA	GPR61	protein_coding
ENSG00000065135.11	3420.13	0.0720112	0.319811	0.225168	0.821848	0.918663	GNAI3	protein_coding
ENSG00000134183.11	2.73089	1.17491	2.69249	0.436364	0.662572	NA	GNAT2	protein_coding
ENSG00000116337.16	2017.74	-0.639447	0.430795	-1.48434	0.137718	0.347873	AMPD2	protein_coding
ENSG00000213366.13	109.013	-0.353046	0.552375	-0.639141	0.522731	0.738615	GSTM2	protein_coding
ENSG00000134184.12	0.23964	-0.0383796	7.05095	-0.00544319	0.995657	NA	GSTM1	protein_coding
ENSG00000134201.12	0.828533	-1.04539	4.46808	-0.233969	0.815009	NA	GSTM5	protein_coding
ENSG00000184371.14	1376.31	0.142019	0.402531	0.352816	0.724226	0.870466	CSF1	protein_coding
ENSG00000168710.18	4032.98	-0.146071	0.28627	-0.510255	0.609873	0.799994	AHCYL1	protein_coding
ENSG00000143093.15	1503.82	-0.31574	0.352389	-0.895997	0.370254	0.615899	STRIP1	protein_coding
ENSG00000156150.8	0.114971	1.51136	7.06302	0.213981	0.830562	NA	ALX3	protein_coding
ENSG00000186150.4	0.12467	-1.44765	7.05512	-0.205192	0.837422	NA	UBL4B	protein_coding
ENSG00000197106.7	3.68699	-0.754461	2.56224	-0.294453	0.768412	NA	SLC6A17	protein_coding
ENSG00000162775.15	3123.15	-0.454932	0.309102	-1.47179	0.141079	0.353093	RBM15	protein_coding
ENSG00000168679.18	33.9421	-1.34422	0.769749	-1.74631	0.0807563	0.249876	SLC16A4	protein_coding
ENSG00000134248.13	1431.08	-0.183303	0.320763	-0.571459	0.567689	0.77097	LAMTOR5	protein_coding
ENSG00000143125.6	0.12467	-1.44765	7.05512	-0.205192	0.837422	NA	PROK1	protein_coding
ENSG00000143105.7	0.365136	3.09683	6.96963	0.444333	0.656802	NA	KCNA10	protein_coding
ENSG00000177301.15	4.31892	1.41544	2.92665	0.483638	0.628643	NA	KCNA2	protein_coding
ENSG00000177272.9	0.690376	0.273716	5.78937	0.047279	0.962291	NA	KCNA3	protein_coding
ENSG00000143119.14	3.50101	1.9781	2.74386	0.720918	0.47096	NA	CD53	protein_coding
ENSG00000121931.16	2256.87	0.202689	0.376138	0.538868	0.589978	0.786215	LRIF1	protein_coding
ENSG00000156171.14	712.233	0.721803	0.377361	1.91277	0.0557778	0.19446	DRAM2	protein_coding
ENSG00000162777.17	4.72015	-0.537525	2.85375	-0.188357	0.850597	NA	DENND2D	protein_coding
ENSG00000064886.14	13.3123	1.42423	1.19694	1.18989	0.234091	0.477865	CHI3L2	protein_coding
ENSG00000134216.19	0.992641	1.91165	4.68599	0.407951	0.68331	NA	CHIA	protein_coding
ENSG00000173947.14	29.5562	0.52842	0.896328	0.589538	0.5555	0.763337	PIFO	protein_coding
ENSG00000085465.12	117.608	-0.5628	0.486627	-1.15653	0.247463	0.492619	OVGP1	protein_coding
ENSG00000116455.14	1928.91	-0.471784	0.33864	-1.39317	0.163568	0.38666	WDR77	protein_coding
ENSG00000116459.11	3516.69	0.131279	0.350912	0.374108	0.708324	0.860206	ATP5PB	protein_coding
ENSG00000143110.11	11.8665	0.497679	1.35792	0.3665	0.713992	0.864092	C1orf162	protein_coding
ENSG00000121933.19	0.844416	1.23512	5.37735	0.22969	0.818333	NA	TMIGD3	protein_coding
ENSG00000282608.1	0.518405	1.71603	6.50302	0.263882	0.791871	NA	ADORA3	protein_coding
ENSG00000116473.14	998.017	0.0670089	0.396629	0.168946	0.865839	0.940018	RAP1A	protein_coding
ENSG00000064703.12	936.258	-0.4462	0.385272	-1.15814	0.246805	0.492006	DDX20	protein_coding
ENSG00000171385.9	9.3247	-3.7855	1.98459	-1.90745	0.0564627	0.195874	KCND3	protein_coding
ENSG00000134245.18	41.3889	1.27066	0.826952	1.53656	0.124401	0.328122	WNT2B	protein_coding
ENSG00000007341.19	708.403	0.582195	0.36465	1.59659	0.110358	0.304246	ST7L	protein_coding
ENSG00000116489.13	5734.11	0.438276	0.401454	1.09172	0.274956	0.521704	CAPZA1	protein_coding
ENSG00000155363.18	3940.52	0.0871008	0.385685	0.225834	0.82133	0.918607	MOV10	protein_coding
ENSG00000155366.16	2046.75	0.583779	0.409201	1.42663	0.153686	0.371257	RHOC	protein_coding
ENSG00000271810.5	0.114971	1.51136	7.06302	0.213981	0.830562	NA	AL603832.3	protein_coding
ENSG00000155367.15	19.4924	-0.0493129	1.29607	-0.0380481	0.969649	0.98768	PPM1J	protein_coding
ENSG00000184599.13	0.985162	3.46525	4.77526	0.725667	0.468043	NA	FAM19A3	protein_coding
ENSG00000198799.12	1171.62	0.648855	0.336864	1.92616	0.0540843	0.190346	LRIG2	protein_coding
ENSG00000081026.19	1009.33	-0.0450576	0.337451	-0.133523	0.893779	0.955356	MAGI3	protein_coding
ENSG00000116793.16	885.518	-0.387536	0.348313	-1.11261	0.265877	0.512907	PHTF1	protein_coding
ENSG00000081019.13	1163.07	0.280941	0.315582	0.890232	0.373342	0.619094	RSBN1	protein_coding
ENSG00000134242.16	3.81327	3.17932	2.75971	1.15205	0.249301	NA	PTPN22	protein_coding
ENSG00000188761.13	8.51168	0.288815	1.54031	0.187504	0.851265	NA	BCL2L15	protein_coding
ENSG00000134262.13	305.691	-0.206798	0.375586	-0.550601	0.581908	0.780406	AP4B1	protein_coding
ENSG00000163349.22	4322.76	0.113555	0.293261	0.387215	0.698597	0.85521	HIPK1	protein_coding
ENSG00000134207.16	1.44087	1.82424	4.35799	0.418597	0.675511	NA	SYT6	protein_coding
ENSG00000197323.12	4461.25	0.478664	0.333298	1.43615	0.150961	0.366705	TRIM33	protein_coding
ENSG00000116752.6	1115.75	0.176	0.398778	0.441349	0.65896	0.830018	BCAS2	protein_coding
ENSG00000175984.15	41.5417	0.691027	0.935927	0.738335	0.460311	0.693201	DENND2C	protein_coding
ENSG00000116748.21	3.26357	3.06307	2.95833	1.03541	0.30048	NA	AMPD1	protein_coding
ENSG00000213281.5	4608.12	-0.026601	0.427429	-0.0622349	0.950376	0.979945	NRAS	protein_coding
ENSG00000009307.16	16297.8	0.307696	0.32106	0.958376	0.337873	0.585987	CSDE1	protein_coding
ENSG00000198765.12	5.07398	-0.705669	2.77156	-0.254611	0.799024	NA	SYCP1	protein_coding
ENSG00000134200.3	0.395058	1.1018	6.97585	0.157945	0.8745	NA	TSHB	protein_coding
ENSG00000134198.10	1.62789	-0.90016	4.21478	-0.213572	0.830881	NA	TSPAN2	protein_coding
ENSG00000134259.3	0.395058	1.1018	6.97585	0.157945	0.8745	NA	NGF	protein_coding
ENSG00000118729.11	3.43584	0.112582	3.08025	0.0365496	0.970844	NA	CASQ2	protein_coding
ENSG00000177551.5	0.900094	0.906078	5.23531	0.173071	0.862596	NA	NHLH2	protein_coding
ENSG00000163399.16	33281	0.27204	0.276861	0.982587	0.325811	0.574722	ATP1A1	protein_coding
ENSG00000116815.16	308.64	-0.399072	0.438943	-0.909167	0.363262	0.609273	CD58	protein_coding
ENSG00000143061.17	83.2062	-0.761961	0.57654	-1.32161	0.186298	0.416577	IGSF3	protein_coding
ENSG00000116824.5	1.03211	2.20577	4.36607	0.505207	0.613413	NA	CD2	protein_coding
ENSG00000134256.12	13.4975	-0.347366	1.17832	-0.294797	0.768149	0.893308	CD101	protein_coding
ENSG00000116830.12	1926.46	-0.528263	0.314377	-1.68035	0.0928888	0.27187	TTF2	protein_coding
ENSG00000134258.17	5.39543	0.480527	2.47482	0.194166	0.846046	NA	VTCN1	protein_coding
ENSG00000198162.12	2818.87	0.501541	0.34137	1.4692	0.141778	0.354068	MAN1A2	protein_coding
ENSG00000183508.5	66.2107	0.779801	0.736929	1.05818	0.289975	0.538091	TENT5C	protein_coding
ENSG00000196505.11	1738.82	0.451415	0.397904	1.13448	0.256593	0.502893	GDAP2	protein_coding
ENSG00000065183.16	1924	0.0987642	0.35594	0.277474	0.781416	0.899682	WDR3	protein_coding
ENSG00000155761.13	14.6426	1.97506	2.00322	0.98594	0.324162	0.573208	SPAG17	protein_coding
ENSG00000116874.11	778.565	0.426982	0.338044	1.2631	0.206554	0.442388	WARS2	protein_coding
ENSG00000116882.14	5.37243	3.14467	1.95125	1.61161	0.107046	NA	HAO2	protein_coding
ENSG00000203859.10	1.25544	-5.61435	4.1313	-1.35898	0.174153	NA	HSD3B2	protein_coding
ENSG00000203857.10	1.29475	1.94571	4.0787	0.477042	0.633332	NA	HSD3B1	protein_coding
ENSG00000143067.5	967.815	0.559929	0.314046	1.78295	0.0745943	0.236816	ZNF697	protein_coding
ENSG00000134240.11	8.33356	0.800086	1.81055	0.441901	0.658561	NA	HMGCS2	protein_coding
ENSG00000134193.15	1.04499	0.466769	4.53982	0.102817	0.918108	NA	REG4	protein_coding
ENSG00000134249.6	0.226342	-2.34658	6.99319	-0.335552	0.737209	NA	ADAM30	protein_coding
ENSG00000134250.20	1755.92	-0.471211	0.322439	-1.4614	0.143906	0.357449	NOTCH2	protein_coding
ENSG00000265808.3	2605.95	0.346376	0.332843	1.04066	0.298033	0.5471	SEC22B	protein_coding
ENSG00000286106.1	4.38807	-0.664742	2.11209	-0.314732	0.752965	NA	AC253572.1	protein_coding
ENSG00000273136.7	223.648	-0.244156	0.391642	-0.623416	0.533011	0.746056	NBPF26	protein_coding
ENSG00000263353.3	0.101672	-1.29892	7.06196	-0.183933	0.854066	NA	PPIAL4A	protein_coding
ENSG00000198019.12	0.584552	1.88564	6.80713	0.27701	0.781772	NA	FCGR1B	protein_coding
ENSG00000263513.5	46.7729	0.668632	0.714299	0.936068	0.349238	0.595618	FAM72C	protein_coding
ENSG00000266338.6	748.396	0.414783	0.311943	1.32967	0.183625	0.413004	NBPF15	protein_coding
ENSG00000256374.2	0.50033	3.54887	6.95589	0.510197	0.609913	NA	PPIAL4D	protein_coding
ENSG00000162825.16	287.155	0.091342	0.374861	0.243669	0.807487	0.912344	NBPF20	protein_coding
ENSG00000117262.19	460.488	0.0907346	0.403266	0.224999	0.82198	0.918705	GPR89A	protein_coding
ENSG00000117281.15	2.19823	1.92115	3.74465	0.51304	0.607924	NA	CD160	protein_coding
ENSG00000265491.5	1249.4	0.0995249	0.340207	0.292542	0.769872	0.893989	RNF115	protein_coding
ENSG00000186141.9	1048.61	-0.222084	0.323131	-0.687287	0.491902	0.71672	POLR3C	protein_coding
ENSG00000186364.12	74.2067	-0.483501	0.568003	-0.851229	0.394642	0.638315	NUDT17	protein_coding
ENSG00000131788.16	642.154	0.268026	0.357584	0.749545	0.453529	0.688191	PIAS3	protein_coding
ENSG00000198483.13	3.3772	-0.745753	2.4169	-0.308557	0.757659	NA	ANKRD35	protein_coding
ENSG00000143127.13	70.165	-0.986488	0.616451	-1.60027	0.109539	0.303207	ITGA10	protein_coding
ENSG00000131779.11	372.065	0.25714	0.351944	0.730629	0.465006	0.697012	PEX11B	protein_coding
ENSG00000265241.6	2948.65	-0.561713	0.297775	-1.88637	0.0592451	0.202663	RBM8A	protein_coding
ENSG00000272031.3	13.976	-0.947944	1.17134	-0.809283	0.418353	0.660077	ANKRD34A	protein_coding
ENSG00000121851.13	106.556	0.469236	0.517743	0.906311	0.364771	0.610879	POLR3GL	protein_coding
ENSG00000271425.8	140.99	0.20223	0.445205	0.454241	0.649655	0.824164	NBPF10	protein_coding
ENSG00000264343.6	21.0191	0.49626	1.07368	0.462203	0.643936	0.820565	NOTCH2NLA	protein_coding
ENSG00000268043.7	630.094	-0.100135	0.348257	-0.287531	0.773705	0.896372	NBPF12	protein_coding
ENSG00000131778.19	257.993	-0.0954682	0.441824	-0.216078	0.828927	0.92253	CHD1L	protein_coding
ENSG00000265107.3	3.94079	2.63531	2.87335	0.917155	0.359061	NA	GJA5	protein_coding
ENSG00000121634.5	0.446584	1.61954	6.96711	0.232455	0.816184	NA	GJA8	protein_coding
ENSG00000188092.14	274.185	0.327387	0.427464	0.765882	0.443747	0.680358	GPR89B	protein_coding
ENSG00000263956.6	505.769	-0.0631219	0.337999	-0.186752	0.851855	0.934085	NBPF11	protein_coding
ENSG00000236334.2	0.229941	2.43908	6.99904	0.348488	0.727474	NA	PPIAL4G	protein_coding
ENSG00000270629.6	183.019	0.0357581	0.441378	0.0810148	0.93543	0.974126	NBPF14	protein_coding
ENSG00000286019.1	0.360123	1.00109	6.99847	0.143044	0.886256	NA	AC239811.1	protein_coding
ENSG00000177144.7	0.109021	1.48196	7.05921	0.209934	0.833719	NA	NUDT4B	protein_coding
ENSG00000178104.19	548.404	-0.223669	0.355488	-0.629189	0.529225	0.743653	PDE4DIP	protein_coding
ENSG00000269713.7	642.656	-0.459299	0.314809	-1.45898	0.144571	0.358173	NBPF9	protein_coding
ENSG00000286219.1	61.0606	-0.0425154	0.643795	-0.0660387	0.947347	0.979409	AC242843.1	protein_coding
ENSG00000286185.1	0.114971	1.51136	7.06302	0.213981	0.830562	NA	AC242842.3	protein_coding
ENSG00000271383.7	11.5285	0.328782	1.25677	0.26161	0.793622	0.90649	NBPF19	protein_coding
ENSG00000150337.13	0.831118	0.419442	4.97664	0.0842821	0.932832	NA	FCGR1A	protein_coding
ENSG00000270882.2	19.4994	0.262037	1.15166	0.22753	0.820012	0.917954	HIST2H4A	protein_coding
ENSG00000203812.2	1431.59	-0.0453877	0.462593	-0.0981158	0.92184	0.968167	HIST2H2AA3	protein_coding
ENSG00000272196.2	22.0739	0.714511	1.01081	0.706869	0.479648	0.707736	HIST2H2AA4	protein_coding
ENSG00000203852.3	18.5819	-0.864195	1.12465	-0.768415	0.44224	0.679269	HIST2H3A	protein_coding
ENSG00000270276.2	295.699	-0.627114	0.526355	-1.19143	0.233486	0.477225	HIST2H4B	protein_coding
ENSG00000184678.10	7343.18	0.110393	0.421911	0.261651	0.79359	0.90649	HIST2H2BE	protein_coding
ENSG00000184260.5	7796.16	0.195074	0.471348	0.413864	0.678974	0.842693	HIST2H2AC	protein_coding
ENSG00000178096.9	32.663	0.701191	0.885165	0.792158	0.428268	0.668195	BOLA1	protein_coding
ENSG00000159164.10	178.165	-0.652818	0.484697	-1.34686	0.178026	0.40498	SV2A	protein_coding
ENSG00000143368.10	2169.97	-0.518559	0.342912	-1.51222	0.130477	0.336903	SF3B4	protein_coding
ENSG00000264522.6	1450.54	-0.526399	0.324209	-1.62364	0.104453	0.294146	OTUD7B	protein_coding
ENSG00000136631.14	811.827	-0.0383291	0.389196	-0.0984828	0.921549	0.968096	VPS45	protein_coding
ENSG00000118292.9	15.7141	0.347524	1.16945	0.297169	0.766337	0.892465	C1orf54	protein_coding
ENSG00000159208.16	3.90794	-0.585705	2.11505	-0.276922	0.78184	NA	CIART	protein_coding
ENSG00000117360.13	1415.71	0.341971	0.358751	0.953227	0.340475	0.588336	PRPF3	protein_coding
ENSG00000163125.15	2472.6	0.552925	0.286472	1.93012	0.0535918	0.189223	RPRD2	protein_coding
ENSG00000143382.14	1259.92	-0.519082	0.492084	-1.05486	0.291487	0.539928	ADAMTSL4	protein_coding
ENSG00000143384.13	8317.41	-0.00424581	0.307034	-0.0138285	0.988967	0.994995	MCL1	protein_coding
ENSG00000143420.18	3409.9	-0.19844	0.292863	-0.677584	0.498035	0.720991	ENSA	protein_coding
ENSG00000143457.11	489.685	0.32594	0.417728	0.780268	0.435233	0.673562	GOLPH3L	protein_coding
ENSG00000143452.16	3.22332	2.09699	2.98596	0.702285	0.482501	NA	HORMAD1	protein_coding
ENSG00000143387.13	48.7838	1.44152	0.735802	1.95912	0.0500989	0.181399	CTSK	protein_coding
ENSG00000143437.21	1244.8	0.15958	0.297542	0.536328	0.591732	0.787485	ARNT	protein_coding
ENSG00000283324.1	0.665446	2.11059	6.48661	0.325377	0.744896	NA	CTXND2	protein_coding
ENSG00000143379.12	1421.17	0.393834	0.299986	1.31284	0.189237	0.42015	SETDB1	protein_coding
ENSG00000143418.19	6612.8	0.0274888	0.30277	0.0907912	0.927658	0.97019	CERS2	protein_coding
ENSG00000143412.10	417.505	0.722143	0.419726	1.72051	0.0853397	0.257804	ANXA9	protein_coding
ENSG00000143409.15	236.841	0.908225	0.484613	1.87412	0.0609133	0.206793	MINDY1	protein_coding
ENSG00000143363.17	474.201	-0.00813765	0.341345	-0.02384	0.98098	0.992041	PRUNE1	protein_coding
ENSG00000163141.19	11.5434	1.33045	1.28842	1.03262	0.301781	0.550801	BNIPL	protein_coding
ENSG00000143443.9	239.924	-0.215562	0.45309	-0.475761	0.634245	0.815357	C1orf56	protein_coding
ENSG00000213190.3	16.5429	-0.775711	1.22617	-0.632627	0.526977	0.742005	MLLT11	protein_coding
ENSG00000143458.12	4.38799	-1.52629	2.80387	-0.544352	0.586199	NA	GABPB2	protein_coding
ENSG00000143434.15	78.4269	-0.498339	0.645116	-0.772479	0.439831	0.677262	SEMA6C	protein_coding
ENSG00000163154.6	0.203345	-2.20785	7.00069	-0.315376	0.752476	NA	TNFAIP8L2	protein_coding
ENSG00000163156.11	510.697	-0.6026	0.400982	-1.50281	0.132888	0.340641	SCNM1	protein_coding
ENSG00000163155.12	253.982	-0.279245	0.394169	-0.70844	0.478672	0.706824	LYSMD1	protein_coding
ENSG00000163159.12	805.111	0.0345531	0.364792	0.0947199	0.924537	0.969037	VPS72	protein_coding
ENSG00000159352.15	3992.88	-0.257171	0.356943	-0.720481	0.471229	0.701202	PSMD4	protein_coding
ENSG00000143373.18	1815.21	-0.125388	0.394453	-0.317879	0.750577	0.883757	ZNF687	protein_coding
ENSG00000143393.16	1395.24	0.290388	0.361831	0.802551	0.422234	0.663409	PI4KB	protein_coding
ENSG00000143390.17	1944.97	-0.495437	0.320618	-1.54526	0.122284	0.324683	RFX5	protein_coding
ENSG00000159377.11	5338.61	-0.766081	0.401317	-1.90892	0.0562727	0.195415	PSMB4	protein_coding
ENSG00000143442.22	3075.94	-0.164221	0.278857	-0.588908	0.555923	0.763339	POGZ	protein_coding
ENSG00000143367.16	480.626	-0.126977	0.345269	-0.367762	0.713051	0.863486	TUFT1	protein_coding
ENSG00000143376.14	2066.15	0.42984	0.350624	1.22593	0.220227	0.459447	SNX27	protein_coding
ENSG00000143436.11	1309.16	-0.392049	0.312041	-1.2564	0.208971	0.445523	MRPL9	protein_coding
ENSG00000143450.16	28.6191	-1.61627	0.931295	-1.73551	0.0826499	0.253445	OAZ3	protein_coding
ENSG00000182134.16	289.339	0.275999	0.395944	0.697066	0.485761	0.712145	TDRKH	protein_coding
ENSG00000213171.2	0.351837	1.14753	6.9879	0.164217	0.869561	NA	LINGO4	protein_coding
ENSG00000143365.18	27.3574	-0.960116	1.03725	-0.925633	0.354637	0.60055	RORC	protein_coding
ENSG00000225556.1	3.64548	-1.03038	2.33475	-0.441323	0.658979	NA	C2CD4D	protein_coding
ENSG00000196407.12	0.690376	0.273716	5.78937	0.047279	0.962291	NA	THEM5	protein_coding
ENSG00000159445.13	323.727	-0.343656	0.400409	-0.858263	0.390747	0.635037	THEM4	protein_coding
ENSG00000197747.9	1674.75	-0.447565	0.291292	-1.53648	0.12442	0.328122	S100A10	protein_coding
ENSG00000163191.6	924.967	-0.187946	0.393361	-0.477795	0.632796	0.814347	S100A11	protein_coding
ENSG00000182898.4	0.970463	0.271059	5.12059	0.0529351	0.957784	NA	TCHHL1	protein_coding
ENSG00000159450.12	4.29798	0.849855	2.89161	0.293904	0.768831	NA	TCHH	protein_coding
ENSG00000215853.3	1.35444	1.36808	4.48249	0.305204	0.760211	NA	RPTN	protein_coding
ENSG00000197915.6	5.05917	0.449788	2.68371	0.167599	0.866899	NA	HRNR	protein_coding
ENSG00000143631.10	19.0045	-0.124812	2.26054	-0.0552133	0.955969	0.982414	FLG	protein_coding
ENSG00000143520.6	4.25157	-2.44876	2.52408	-0.970157	0.331968	NA	FLG2	protein_coding
ENSG00000143536.7	0.259864	0.0797654	7.04538	0.0113217	0.990967	NA	CRNN	protein_coding
ENSG00000186207.5	0.696899	-0.450731	5.38945	-0.0836321	0.933349	NA	LCE5A	protein_coding
ENSG00000185966.3	0.23964	-0.0383796	7.05095	-0.00544319	0.995657	NA	LCE3E	protein_coding
ENSG00000163202.5	0.50033	3.54887	6.95589	0.510197	0.609913	NA	LCE3D	protein_coding
ENSG00000244057.4	0.622225	2.19977	6.05974	0.363014	0.716594	NA	LCE3C	protein_coding
ENSG00000185962.1	0.374834	0.998771	6.98099	0.14307	0.886235	NA	LCE3A	protein_coding
ENSG00000187180.3	0.419987	-1.37903	6.96934	-0.197872	0.843145	NA	LCE2C	protein_coding
ENSG00000159455.8	0.23964	-0.0383796	7.05095	-0.00544319	0.995657	NA	LCE2B	protein_coding
ENSG00000187170.4	0.135194	1.62948	7.05747	0.230888	0.817402	NA	LCE4A	protein_coding
ENSG00000198854.5	1.71071	5.32411	4.40295	1.20922	0.22658	NA	C1orf68	protein_coding
ENSG00000203786.6	1.70902	0.440378	3.50543	0.125627	0.900027	NA	KPRP	protein_coding
ENSG00000240386.3	168.549	11.945	6.9185	1.72653	0.0842522	0.25581	LCE1F	protein_coding
ENSG00000172155.9	2.07584	5.60328	4.12023	1.35994	0.173848	NA	LCE1D	protein_coding
ENSG00000235942.2	0.259864	0.0797654	7.04538	0.0113217	0.990967	NA	LCE6A	protein_coding
ENSG00000163206.6	0.23964	-0.0383796	7.05095	-0.00544319	0.995657	NA	SMCP	protein_coding
ENSG00000163207.7	0.645223	2.06392	5.98562	0.344814	0.730234	NA	IVL	protein_coding
ENSG00000283227.1	0.135194	1.62948	7.05747	0.230888	0.817402	NA	SPRR5	protein_coding
ENSG00000163209.15	0.690376	0.273716	5.78937	0.047279	0.962291	NA	SPRR3	protein_coding
ENSG00000163216.7	0.318315	-0.798562	6.99649	-0.114138	0.909129	NA	SPRR2D	protein_coding
ENSG00000241794.2	0.226342	-2.34658	6.99319	-0.335552	0.737209	NA	SPRR2A	protein_coding
ENSG00000196805.7	0.259864	0.0797654	7.04538	0.0113217	0.990967	NA	SPRR2B	protein_coding
ENSG00000203785.9	0.101672	-1.29892	7.06196	-0.183933	0.854066	NA	SPRR2E	protein_coding
ENSG00000244094.2	0.510029	1.62402	6.54589	0.248098	0.804059	NA	SPRR2F	protein_coding
ENSG00000159516.9	0.959387	1.49235	5.13827	0.290438	0.771481	NA	SPRR2G	protein_coding
ENSG00000203784.3	0.254852	-2.88564	7.05456	-0.409047	0.682505	NA	LELP1	protein_coding
ENSG00000203783.5	0.519065	0.12842	6.1492	0.020884	0.983338	NA	PRR9	protein_coding
ENSG00000203782.6	0.203345	-2.20785	7.00069	-0.315376	0.752476	NA	LOR	protein_coding
ENSG00000159527.3	0.889569	0.0580868	5.26439	0.0110339	0.991196	NA	PGLYRP3	protein_coding
ENSG00000163218.15	0.906193	-1.44032	4.81511	-0.299125	0.764844	NA	PGLYRP4	protein_coding
ENSG00000163220.11	3.32557	3.1911	2.63612	1.21053	0.226076	NA	S100A9	protein_coding
ENSG00000143546.10	0.305017	-2.78832	6.97356	-0.399842	0.689273	NA	S100A8	protein_coding
ENSG00000184330.12	0.847742	-1.15359	5.32993	-0.216435	0.828648	NA	S100A7A	protein_coding
ENSG00000143556.9	0.23964	-0.0383796	7.05095	-0.00544319	0.995657	NA	S100A7	protein_coding
ENSG00000197956.10	1073.93	0.492488	0.433504	1.13606	0.255931	0.502473	S100A6	protein_coding
ENSG00000196420.7	0.458196	-4.32359	6.81506	-0.634416	0.525809	NA	S100A5	protein_coding
ENSG00000196754.10	17.1065	-1.3083	1.05686	-1.23791	0.215751	0.453772	S100A2	protein_coding
ENSG00000189334.9	27.5712	0.573787	0.949246	0.604466	0.545534	0.756095	S100A14	protein_coding
ENSG00000189171.14	391.25	-0.415478	0.424835	-0.977974	0.328087	0.577186	S100A13	protein_coding
ENSG00000160678.11	779.332	0.281506	0.421988	0.667096	0.504711	0.726213	S100A1	protein_coding
ENSG00000160679.13	2144.85	-0.151634	0.28812	-0.526288	0.598688	0.792308	CHTOP	protein_coding
ENSG00000143553.10	315.274	-0.260798	0.367816	-0.709047	0.478296	0.706824	SNAPIN	protein_coding
ENSG00000143621.17	6811.06	0.23872	0.352002	0.678177	0.49766	0.720912	ILF2	protein_coding
ENSG00000169418.10	10.4988	0.499432	1.81287	0.275492	0.782939	0.900566	NPR1	protein_coding
ENSG00000143624.14	1933.55	-0.084664	0.301013	-0.281264	0.778508	0.898619	INTS3	protein_coding
ENSG00000143614.10	1968.46	0.436281	0.287712	1.51638	0.129423	0.335329	GATAD2B	protein_coding
ENSG00000198837.10	2133.85	-0.591209	0.367703	-1.60785	0.107869	0.300448	DENND4B	protein_coding
ENSG00000160741.17	858.441	0.320036	0.417244	0.767025	0.443067	0.680046	CRTC2	protein_coding
ENSG00000143543.15	428.803	-0.334629	0.393789	-0.849767	0.395454	0.638986	JTB	protein_coding
ENSG00000285641.1	6.31162	-0.972964	1.88225	-0.516914	0.605216	NA	AL358472.6	protein_coding
ENSG00000143545.8	124.866	0.142847	0.474592	0.30099	0.763422	0.891239	RAB13	protein_coding
ENSG00000177954.13	12718	0.577952	0.446532	1.29431	0.195558	0.427983	RPS27	protein_coding
ENSG00000143552.9	10.0119	-1.21169	1.49117	-0.812575	0.416462	0.658506	NUP210L	protein_coding
ENSG00000163263.7	4.39972	0.269708	2.02808	0.132987	0.894204	NA	C1orf189	protein_coding
ENSG00000143612.20	3827.54	-0.10557	0.293947	-0.359146	0.719486	0.867482	C1orf43	protein_coding
ENSG00000143569.19	7500.05	-0.0335104	0.316716	-0.105806	0.915736	0.965428	UBAP2L	protein_coding
ENSG00000143575.14	1436.12	-0.00519089	0.346316	-0.0149889	0.988041	0.994675	HAX1	protein_coding
ENSG00000143595.13	2.51096	-0.143921	2.51833	-0.0571496	0.954426	NA	AQP10	protein_coding
ENSG00000143515.17	3167.65	-0.352026	0.346899	-1.01478	0.310211	0.559108	ATP8B2	protein_coding
ENSG00000160712.13	1008.97	0.0602335	0.328532	0.183341	0.85453	0.935184	IL6R	protein_coding
ENSG00000169291.10	3.18946	1.87999	3.03649	0.619132	0.53583	NA	SHE	protein_coding
ENSG00000163239.12	2.56897	2.18334	3.35331	0.6511	0.514982	NA	TDRD10	protein_coding
ENSG00000160714.10	2032.03	0.208515	0.304275	0.685285	0.493164	0.717536	UBE2Q1	protein_coding
ENSG00000160716.5	5.94531	0.545264	1.7874	0.30506	0.76032	NA	CHRNB2	protein_coding
ENSG00000160710.16	8057.99	-0.0324535	0.270734	-0.119872	0.904585	0.959802	ADAR	protein_coding
ENSG00000143603.19	5.40825	1.87724	2.34854	0.799324	0.424103	NA	KCNN3	protein_coding
ENSG00000163348.4	1513.73	-0.379568	0.324944	-1.1681	0.242765	0.487566	PYGO2	protein_coding
ENSG00000160691.18	5360.59	0.209566	0.368211	0.569146	0.569257	0.771979	SHC1	protein_coding
ENSG00000160688.19	786.974	-0.393616	0.40895	-0.962504	0.335797	0.583842	FLAD1	protein_coding
ENSG00000163352.5	4.41801	-0.594069	1.9563	-0.303671	0.761379	NA	LENEP	protein_coding
ENSG00000163354.15	14.0789	0.767572	1.48764	0.515966	0.605878	0.797578	DCST2	protein_coding
ENSG00000163357.10	1.51276	2.63336	3.80811	0.691514	0.489242	NA	DCST1	protein_coding
ENSG00000243364.8	273.42	-1.0191	0.527053	-1.93359	0.0531641	0.188323	EFNA4	protein_coding
ENSG00000143590.14	36.3187	-1.00227	0.829207	-1.20871	0.226773	0.468379	EFNA3	protein_coding
ENSG00000169241.19	681.505	-0.606188	0.371402	-1.63216	0.102646	0.290765	SLC50A1	protein_coding
ENSG00000163463.11	119.041	0.897815	0.475808	1.88693	0.05917	0.202477	KRTCAP2	protein_coding
ENSG00000163462.18	13.9125	-1.99473	1.30944	-1.52335	0.127672	0.332762	TRIM46	protein_coding
ENSG00000185499.16	4.49513	-3.54958	2.2501	-1.57752	0.114676	NA	MUC1	protein_coding
ENSG00000169231.13	68.0221	0.324037	0.67063	0.483183	0.628966	0.812471	THBS3	protein_coding
ENSG00000177628.16	621.321	-0.431173	0.462106	-0.93306	0.350789	0.596864	GBA	protein_coding
ENSG00000160767.21	1002.66	-0.794253	0.405577	-1.95833	0.0501912	0.18149	FAM189B	protein_coding
ENSG00000116521.11	1542.49	-0.182288	0.381427	-0.47791	0.632714	0.814316	SCAMP3	protein_coding
ENSG00000176444.19	1484.68	-0.300453	0.339665	-0.884557	0.376396	0.621863	CLK2	protein_coding
ENSG00000160753.16	760.085	-0.505845	0.35503	-1.42479	0.154217	0.371992	RUSC1	protein_coding
ENSG00000163374.19	1483.09	0.110034	0.297638	0.369691	0.711613	0.862489	YY1AP1	protein_coding
ENSG00000132676.16	2371.67	-0.073527	0.28495	-0.258035	0.79638	0.90748	DAP3	protein_coding
ENSG00000116580.18	1708.63	0.372823	0.284796	1.30909	0.190505	0.421385	GON4L	protein_coding
ENSG00000132718.9	191.439	-0.247378	0.557306	-0.443882	0.657128	0.828879	SYT11	protein_coding
ENSG00000143622.11	574.285	-0.144386	0.350198	-0.412297	0.680122	0.843162	RIT1	protein_coding
ENSG00000132680.11	2287.86	0.105764	0.296975	0.356137	0.721738	0.869026	KHDC4	protein_coding
ENSG00000173080.5	17.5445	-0.638591	1.0188	-0.626805	0.530787	0.744732	RXFP4	protein_coding
ENSG00000163479.14	4298.12	-0.0301148	0.31123	-0.0967607	0.922916	0.968374	SSR2	protein_coding
ENSG00000116586.11	804.688	0.0879291	0.436209	0.201576	0.840248	0.928138	LAMTOR2	protein_coding
ENSG00000132698.15	2.3902	0.087199	2.67581	0.0325878	0.974003	NA	RAB25	protein_coding
ENSG00000160789.20	8570.93	0.520403	0.399166	1.30373	0.192327	0.423556	LMNA	protein_coding
ENSG00000196189.13	29.7261	-0.673536	0.969322	-0.694853	0.487148	0.713113	SEMA4A	protein_coding
ENSG00000160785.13	1254	-0.275339	0.30111	-0.914415	0.360499	0.606326	SLC25A44	protein_coding
ENSG00000260238.6	3.32521	-1.98147	3.00234	-0.659974	0.50927	NA	PMF1-BGLAP	protein_coding
ENSG00000242252.2	5.94519	-1.71965	1.8045	-0.952982	0.340599	NA	BGLAP	protein_coding
ENSG00000160781.17	63.0294	0.247375	0.634525	0.389859	0.696641	0.853652	PAQR6	protein_coding
ENSG00000198952.8	4775.37	-0.580492	0.354101	-1.63934	0.101142	0.287669	SMG5	protein_coding
ENSG00000163472.19	119.157	-0.797323	0.531024	-1.50148	0.133231	0.341233	TMEM79	protein_coding
ENSG00000198715.13	1800.37	-0.418122	0.394898	-1.05881	0.289686	0.537911	GLMP	protein_coding
ENSG00000189030.9	0.872065	-1.71115	4.60891	-0.371271	0.710436	NA	VHLL	protein_coding
ENSG00000163468.15	12619.1	-0.232993	0.312239	-0.746201	0.455546	0.689568	CCT3	protein_coding
ENSG00000163467.11	16.2212	-0.195593	1.06996	-0.182803	0.854952	0.93549	TSACC	protein_coding
ENSG00000132677.13	2104.47	0.451423	0.381926	1.18196	0.237221	0.481451	RHBG	protein_coding
ENSG00000125462.17	5.77293	-0.500322	2.45183	-0.204061	0.838306	NA	C1orf61	protein_coding
ENSG00000116604.18	783.127	0.520177	0.430888	1.20722	0.227347	0.46895	MEF2D	protein_coding
ENSG00000187862.11	15.5831	-1.65881	1.51488	-1.09501	0.273513	0.520454	TTC24	protein_coding
ENSG00000160818.16	1643.55	-0.540386	0.312741	-1.7279	0.0840055	0.255263	GPATCH4	protein_coding
ENSG00000132702.13	1.75878	2.33567	3.60357	0.648154	0.516885	NA	HAPLN2	protein_coding
ENSG00000132692.19	4.24333	-1.0579	2.4474	-0.432257	0.665555	NA	BCAN	protein_coding
ENSG00000143320.9	43.1374	0.0172596	0.88997	0.0193935	0.984527	0.993378	CRABP2	protein_coding
ENSG00000143303.12	518.621	-0.645189	0.387828	-1.6636	0.0961934	0.278513	RRNAD1	protein_coding
ENSG00000143314.12	467.005	0.248145	0.378281	0.655981	0.511836	0.730906	MRPL24	protein_coding
ENSG00000143294.15	2222.63	-0.269093	0.358591	-0.750418	0.453003	0.688141	PRCC	protein_coding
ENSG00000198400.11	1.93261	2.54027	3.56709	0.71214	0.476378	NA	NTRK1	protein_coding
ENSG00000027644.5	0.135194	1.62948	7.05747	0.230888	0.817402	NA	INSRR	protein_coding
ENSG00000160838.14	0.644397	-0.5147	6.53594	-0.0787492	0.937232	NA	LRRC71	protein_coding
ENSG00000253831.2	0.631924	0.789111	6.03307	0.130797	0.895936	NA	ETV3L	protein_coding
ENSG00000117036.12	1046.57	0.0341755	0.301057	0.113518	0.90962	0.961753	ETV3	protein_coding
ENSG00000143297.19	7.35366	1.03332	2.53152	0.408184	0.683139	NA	FCRL5	protein_coding
ENSG00000163518.11	1.31055	-0.574717	4.0768	-0.140973	0.887892	NA	FCRL4	protein_coding
ENSG00000160856.21	2.74782	0.995612	3.158	0.315266	0.752559	NA	FCRL3	protein_coding
ENSG00000132704.16	1.9379	-1.07929	3.68125	-0.293185	0.769381	NA	FCRL2	protein_coding
ENSG00000163534.15	0.922265	-0.7708	5.15211	-0.149609	0.881073	NA	FCRL1	protein_coding
ENSG00000073754.6	2.02597	0.75176	3.67299	0.204673	0.837828	NA	CD5L	protein_coding
ENSG00000183853.18	32.7977	-0.9356	0.777311	-1.20364	0.22873	0.470935	KIRREL1	protein_coding
ENSG00000158473.6	1.10151	1.06003	4.4635	0.237489	0.812278	NA	CD1D	protein_coding
ENSG00000158477.7	0.442985	-1.47611	6.90212	-0.213862	0.830654	NA	CD1A	protein_coding
ENSG00000158481.13	0.36431	-1.0659	6.98264	-0.15265	0.878674	NA	CD1C	protein_coding
ENSG00000158485.10	0.344912	3.02052	6.9724	0.433211	0.664861	NA	CD1B	protein_coding
ENSG00000158488.16	0.249339	-2.47519	6.98685	-0.354265	0.72314	NA	CD1E	protein_coding
ENSG00000186306.1	0.109021	1.48196	7.05921	0.209934	0.833719	NA	OR10T2	protein_coding
ENSG00000180708.5	0.12467	-1.44765	7.05512	-0.205192	0.837422	NA	OR10K2	protein_coding
ENSG00000173285.4	0.284437	3.2387	7.03951	0.460075	0.645462	NA	OR10K1	protein_coding
ENSG00000198965.4	0.203345	-2.20785	7.00069	-0.315376	0.752476	NA	OR10R2	protein_coding
ENSG00000197532.2	0.561705	-1.96536	6.25981	-0.313964	0.753548	NA	OR6Y1	protein_coding
ENSG00000279111.2	0.114971	1.51136	7.06302	0.213981	0.830562	NA	OR10X1	protein_coding
ENSG00000198967.4	1.72776	-0.337559	3.66939	-0.0919934	0.926703	NA	OR10Z1	protein_coding
ENSG00000163554.13	5.05252	-0.487204	2.65992	-0.183165	0.854668	NA	SPTA1	protein_coding
ENSG00000196171.3	0.101672	-1.29892	7.06196	-0.183933	0.854066	NA	OR6K2	protein_coding
ENSG00000203757.2	0.600351	-3.75128	6.65651	-0.56355	0.57306	NA	OR6K3	protein_coding
ENSG00000197403.4	0.341313	-0.937297	6.98898	-0.134111	0.893315	NA	OR6N1	protein_coding
ENSG00000180433.5	0.384533	-0.947744	6.97702	-0.135838	0.891949	NA	OR6K6	protein_coding
ENSG00000188340.2	0.384533	-0.947744	6.97702	-0.135838	0.891949	NA	OR6N2	protein_coding
ENSG00000163563.8	0.49673	0.202038	6.61154	0.0305585	0.975622	NA	MNDA	protein_coding
ENSG00000163564.14	13.7178	4.25057	2.43931	1.74253	0.0814157	0.251403	PYHIN1	protein_coding
ENSG00000163565.18	3.29525	4.64521	2.88587	1.60964	0.107477	NA	IFI16	protein_coding
ENSG00000163568.15	0.838043	-0.28175	4.93162	-0.0571314	0.954441	NA	AIM2	protein_coding
ENSG00000162706.13	0.12467	-1.44765	7.05512	-0.205192	0.837422	NA	CADM3	protein_coding
ENSG00000213088.11	0.101672	-1.29892	7.06196	-0.183933	0.854066	NA	ACKR1	protein_coding
ENSG00000179639.10	0.351837	1.14753	6.9879	0.164217	0.869561	NA	FCER1A	protein_coding
ENSG00000196184.9	1.48463	-0.0661203	4.12988	-0.0160102	0.987226	NA	OR10J1	protein_coding
ENSG00000184155.8	0.475681	-3.41553	6.95417	-0.491148	0.623322	NA	OR10J5	protein_coding
ENSG00000132703.4	0.233691	-0.0677884	7.04712	-0.0096193	0.992325	NA	APCS	protein_coding
ENSG00000132693.12	0.49673	0.202038	6.61154	0.0305585	0.975622	NA	CRP	protein_coding
ENSG00000158716.8	0.606377	-1.12651	5.78357	-0.194778	0.845567	NA	DUSP23	protein_coding
ENSG00000181036.14	0.864404	-2.96852	4.34442	-0.683293	0.494422	NA	FCRL6	protein_coding
ENSG00000158714.11	0.23964	-0.0383796	7.05095	-0.00544319	0.995657	NA	SLAMF8	protein_coding
ENSG00000256029.6	0.216643	0.110366	7.05779	0.0156375	0.987524	NA	AL590560.1	protein_coding
ENSG00000213085.10	1.68465	-2.11664	3.24211	-0.652858	0.513848	NA	CFAP45	protein_coding
ENSG00000085552.17	5.95029	-2.11583	1.85965	-1.13775	0.255223	NA	IGSF9	protein_coding
ENSG00000162723.10	0.434686	2.34958	6.99581	0.335855	0.73698	NA	SLAMF9	protein_coding
ENSG00000177807.9	995.379	-0.220921	0.314684	-0.70204	0.482654	0.709603	KCNJ10	protein_coding
ENSG00000143315.7	746.309	-0.564123	0.331156	-1.7035	0.0884754	0.263868	PIGM	protein_coding
ENSG00000162728.5	3.23968	-0.930168	2.43337	-0.382255	0.702272	NA	KCNJ9	protein_coding
ENSG00000132681.16	4.17087	2.1587	2.52171	0.856046	0.391972	NA	ATP1A4	protein_coding
ENSG00000143318.13	5.4484	-2.36125	1.95182	-1.20977	0.226367	NA	CASQ1	protein_coding
ENSG00000132716.18	1421.82	0.492191	0.325364	1.51274	0.130345	0.336741	DCAF8	protein_coding
ENSG00000258465.7	0.236866	0.228511	7.05224	0.0324026	0.974151	NA	AL139011.2	protein_coding
ENSG00000162735.18	1350.27	-0.355927	0.351293	-1.01319	0.310969	0.55998	PEX19	protein_coding
ENSG00000122218.15	10234.6	0.425203	0.278748	1.5254	0.127159	0.332004	COPA	protein_coding
ENSG00000162736.17	3961.4	-0.192641	0.323894	-0.594765	0.552001	0.761244	NCSTN	protein_coding
ENSG00000171786.6	10.7295	-0.702681	1.27931	-0.549263	0.582825	0.781047	NHLH1	protein_coding
ENSG00000162738.6	88.0911	-1.04031	0.576811	-1.80355	0.0713019	0.229613	VANGL2	protein_coding
ENSG00000162739.14	0.830292	-1.40499	5.41126	-0.259641	0.795141	NA	SLAMF6	protein_coding
ENSG00000066294.14	2.17947	3.33754	3.27976	1.01762	0.30886	NA	CD84	protein_coding
ENSG00000117090.15	1.19265	0.053049	4.30314	0.012328	0.990164	NA	SLAMF1	protein_coding
ENSG00000117091.10	1.8293	-0.621463	3.83695	-0.161968	0.871331	NA	CD48	protein_coding
ENSG00000026751.17	0.976601	-2.2701	4.14156	-0.548127	0.583605	NA	SLAMF7	protein_coding
ENSG00000122224.18	1.99052	0.900297	3.6629	0.245788	0.805846	NA	LY9	protein_coding
ENSG00000122223.13	3.13375	-3.21567	2.85712	-1.12549	0.260379	NA	CD244	protein_coding
ENSG00000179914.5	0.101672	-1.29892	7.06196	-0.183933	0.854066	NA	ITLN1	protein_coding
ENSG00000158764.7	5.22327	4.42927	2.93708	1.50806	0.13154	NA	ITLN2	protein_coding
ENSG00000215845.11	3.6512	1.20284	2.18156	0.551369	0.581381	NA	TSTD1	protein_coding
ENSG00000158773.14	723.174	-0.426229	0.408905	-1.04237	0.297242	0.545969	USF1	protein_coding
ENSG00000186517.14	39.536	2.86218	2.2915	1.24904	0.21165	0.448751	ARHGAP30	protein_coding
ENSG00000162755.14	21.5124	0.169318	0.993721	0.170388	0.864705	0.939366	KLHDC9	protein_coding
ENSG00000143256.5	1068.81	-0.371257	0.373269	-0.99461	0.319926	0.569523	PFDN2	protein_coding
ENSG00000158793.14	625.684	-0.16847	0.389914	-0.432069	0.665691	0.834802	NIT1	protein_coding
ENSG00000158796.17	837.62	-0.0518239	0.319866	-0.162017	0.871292	0.943488	DEDD	protein_coding
ENSG00000143222.12	935.415	-0.0111115	0.362082	-0.0306879	0.975518	0.989866	UFC1	protein_coding
ENSG00000143258.16	705.966	-0.329302	0.377209	-0.872995	0.382666	0.626957	USP21	protein_coding
ENSG00000143224.18	281.531	-0.43037	0.39499	-1.08957	0.275902	0.522893	PPOX	protein_coding
ENSG00000158850.15	1380.01	-0.22976	0.389335	-0.590134	0.555101	0.763151	B4GALT3	protein_coding
ENSG00000158864.12	2893.25	-0.234447	0.326	-0.719164	0.47204	0.701825	NDUFS2	protein_coding
ENSG00000158869.11	19.4347	-0.672891	1.16133	-0.579412	0.562311	0.767435	FCER1G	protein_coding
ENSG00000143257.11	5.38076	0.96124	1.83757	0.523103	0.600902	NA	NR1I3	protein_coding
ENSG00000143252.14	3130.4	0.32283	0.391245	0.825136	0.409295	0.652094	SDHC	protein_coding
ENSG00000188931.3	0.99706	1.72204	4.66977	0.368763	0.712305	NA	CFAP126	protein_coding
ENSG00000143226.13	2.516	-2.713	2.8682	-0.945891	0.344204	NA	FCGR2A	protein_coding
ENSG00000173110.8	2.18249	5.54879	3.79402	1.46251	0.143601	NA	HSPA6	protein_coding
ENSG00000203747.11	1.74763	0.701322	3.25168	0.21568	0.829237	NA	FCGR3A	protein_coding
ENSG00000162747.11	0.149243	1.71131	7.04925	0.242765	0.808187	NA	FCGR3B	protein_coding
ENSG00000072694.20	2.85709	0.652945	3.22092	0.20272	0.839354	NA	FCGR2B	protein_coding
ENSG00000162746.14	7.77242	0.423922	1.52423	0.278122	0.780919	NA	FCRLB	protein_coding
ENSG00000081721.11	651.571	-0.235086	0.316272	-0.743303	0.457298	0.691155	DUSP12	protein_coding
ENSG00000118217.6	1701.75	0.461015	0.392135	1.17565	0.239733	0.484051	ATF6	protein_coding
ENSG00000162745.10	4.9435	-0.885765	1.98579	-0.446053	0.655559	NA	OLFML2B	protein_coding
ENSG00000171722.12	0.530252	1.68988	6.95257	0.243059	0.80796	NA	SPATA46	protein_coding
ENSG00000198574.6	2.69199	0.55252	3.32161	0.166341	0.867888	NA	SH2D1B	protein_coding
ENSG00000152332.16	4019.87	0.330996	0.343365	0.963976	0.335058	0.583247	UHMK1	protein_coding
ENSG00000117143.13	1686.15	0.0136275	0.386641	0.0352458	0.971884	0.988737	UAP1	protein_coding
ENSG00000162733.18	53.4461	0.197705	0.668795	0.295614	0.767525	0.893044	DDR2	protein_coding
ENSG00000185860.13	0.965486	-0.749906	4.73533	-0.158364	0.87417	NA	CCDC190	protein_coding
ENSG00000117152.13	1.78941	-1.91675	3.81139	-0.502901	0.615034	NA	RGS4	protein_coding
ENSG00000143248.13	30.3681	0.730386	0.876299	0.83349	0.404568	0.647905	RGS5	protein_coding
ENSG00000143228.13	977.831	0.0630514	0.377701	0.166935	0.867421	0.941073	NUF2	protein_coding
ENSG00000185630.18	14.21	1.4832	1.28284	1.15619	0.247605	0.492703	PBX1	protein_coding
ENSG00000162761.14	2.28647	0.221881	3.15662	0.0702908	0.943962	NA	LMX1A	protein_coding
ENSG00000143171.13	0.716147	0.0220728	5.25307	0.00420188	0.996647	NA	RXRG	protein_coding
ENSG00000162763.3	0.12467	-1.44765	7.05512	-0.205192	0.837422	NA	LRRC52	protein_coding
ENSG00000143198.13	648.095	0.00292385	0.328051	0.00891278	0.992889	0.997179	MGST3	protein_coding
ENSG00000143183.16	2995.02	0.18974	0.297163	0.638504	0.523146	0.738988	TMCO1	protein_coding
ENSG00000188859.6	22.2039	-0.925477	0.948237	-0.975997	0.329066	0.577821	FAM78B	protein_coding
ENSG00000143157.11	1772.53	-0.282101	0.293062	-0.9626	0.335749	0.583842	POGK	protein_coding
ENSG00000143167.12	4.0985	0.566009	2.92036	0.193815	0.846321	NA	GPA33	protein_coding
ENSG00000198842.9	1.18295	0.649709	4.32012	0.150391	0.880456	NA	DUSP27	protein_coding
ENSG00000143190.23	3639.46	-0.142558	0.28291	-0.503898	0.614333	0.802641	POU2F1	protein_coding
ENSG00000198821.10	7.79524	-0.529195	1.78011	-0.297282	0.766251	NA	CD247	protein_coding
ENSG00000143162.9	1049.68	0.0448796	0.38379	0.116938	0.906909	0.961074	CREG1	protein_coding
ENSG00000198771.11	5.53774	2.74018	2.49594	1.09786	0.272268	NA	RCSD1	protein_coding
ENSG00000197965.12	2608.93	-0.384012	0.291478	-1.31747	0.187682	0.418222	MPZL1	protein_coding
ENSG00000143199.17	13.7254	1.18418	1.29507	0.91438	0.360517	0.606326	ADCY10	protein_coding
ENSG00000143164.15	1481.78	0.00255674	0.337262	0.00758088	0.993951	0.997386	DCAF6	protein_coding
ENSG00000143155.13	1034.43	0.106753	0.335727	0.317977	0.750502	0.883751	TIPRL	protein_coding
ENSG00000213064.10	6882.87	0.405585	0.318367	1.27395	0.20268	0.437045	SFT2D2	protein_coding
ENSG00000143178.13	66.8019	1.12004	0.582307	1.92345	0.0544241	0.191166	TBX19	protein_coding
ENSG00000143185.4	1.07808	2.70961	4.99242	0.542746	0.587305	NA	XCL2	protein_coding
ENSG00000143184.5	78.5801	0.842842	0.547932	1.53822	0.123994	0.327614	XCL1	protein_coding
ENSG00000143196.5	0.109021	1.48196	7.05921	0.209934	0.833719	NA	DPT	protein_coding
ENSG00000143153.12	7921.91	-0.188371	0.357691	-0.526631	0.59845	0.79225	ATP1B1	protein_coding
ENSG00000143156.14	319.369	0.142966	0.429506	0.332863	0.739238	0.878038	NME7	protein_coding
ENSG00000117475.14	568.816	0.267134	0.486156	0.549482	0.582675	0.781012	BLZF1	protein_coding
ENSG00000117477.12	5.88221	-0.0549302	1.96725	-0.0279223	0.977724	NA	CCDC181	protein_coding
ENSG00000117479.14	2578.74	-0.550097	0.320998	-1.71371	0.0865827	0.260295	SLC19A2	protein_coding
ENSG00000174175.17	14.2089	1.54118	2.12638	0.72479	0.468581	0.699594	SELP	protein_coding
ENSG00000000460.17	1145.46	-0.630208	0.371993	-1.69414	0.0902389	0.267059	C1orf112	protein_coding
ENSG00000188404.9	4.05272	-1.43337	2.88522	-0.496798	0.619332	NA	SELL	protein_coding
ENSG00000007908.16	4.41976	-3.81779	2.65334	-1.43886	0.150191	NA	SELE	protein_coding
ENSG00000171806.12	156.544	-0.69764	0.549617	-1.26932	0.204327	0.439262	METTL18	protein_coding
ENSG00000075945.13	344.226	-0.441282	0.412306	-1.07028	0.284494	0.532557	KIFAP3	protein_coding
ENSG00000203740.3	4.03257	2.97148	2.52758	1.17562	0.239747	NA	METTL11B	protein_coding
ENSG00000120370.12	279.139	0.0188508	0.412209	0.0457312	0.963524	0.985424	GORAB	protein_coding
ENSG00000116132.12	2.25142	1.82865	3.11999	0.586107	0.557803	NA	PRRX1	protein_coding
ENSG00000117501.14	2.36411	-3.76098	3.19947	-1.1755	0.239794	NA	MROH9	protein_coding
ENSG00000007933.13	1.43604	0.631019	3.87653	0.162779	0.870692	NA	FMO3	protein_coding
ENSG00000094963.14	1.45327	0.802285	3.84293	0.208769	0.834629	NA	FMO2	protein_coding
ENSG00000010932.17	0.959387	1.49235	5.13827	0.290438	0.771481	NA	FMO1	protein_coding
ENSG00000076258.10	9.39232	0.723808	1.45314	0.498099	0.618414	0.804992	FMO4	protein_coding
ENSG00000117523.16	14218.5	0.371872	0.340449	1.0923	0.274702	0.521474	PRRC2C	protein_coding
ENSG00000283683.1	3.57446	0.387501	2.39884	0.161537	0.871671	NA	MYOCOS	protein_coding
ENSG00000034971.17	0.981186	4.25006	4.7903	0.887224	0.374959	NA	MYOC	protein_coding
ENSG00000117533.15	193.154	0.214503	0.428245	0.500888	0.61645	0.803841	VAMP4	protein_coding
ENSG00000010165.20	1079.65	-0.602768	0.342574	-1.75953	0.078488	0.24537	EEF1AKNMT	protein_coding
ENSG00000197959.14	18.7372	1.5343	1.29478	1.185	0.236019	0.480103	DNM3	protein_coding
ENSG00000135845.10	644.913	-0.0290508	0.35364	-0.0821479	0.934529	0.973856	PIGC	protein_coding
ENSG00000180999.11	12.4131	0.462641	1.57965	0.292876	0.769617	0.893985	C1orf105	protein_coding
ENSG00000094975.14	2187.64	0.0318819	0.382019	0.0834563	0.933489	0.973515	SUCO	protein_coding
ENSG00000117560.8	1.3262	-2.14622	4.27075	-0.502539	0.615289	NA	FASLG	protein_coding
ENSG00000120337.8	1.126	1.36975	4.20519	0.325728	0.74463	NA	TNFSF18	protein_coding
ENSG00000117592.9	8187.24	-0.444899	0.306351	-1.45225	0.146432	0.360473	PRDX6	protein_coding
ENSG00000162753.13	2.89936	2.07764	3.2819	0.63306	0.526694	NA	SLC9C2	protein_coding
ENSG00000285777.1	0.520553	3.60349	6.9545	0.518153	0.604352	NA	AL139142.2	protein_coding
ENSG00000183831.6	2.61249	0.978582	3.15367	0.310299	0.756333	NA	ANKRD45	protein_coding
ENSG00000232113.3	0.498679	-3.48106	6.95258	-0.500686	0.616592	NA	TEX50	protein_coding
ENSG00000076321.11	535.533	0.545083	0.343987	1.5846	0.113057	0.308898	KLHL20	protein_coding
ENSG00000120334.15	478.947	-0.661277	0.341421	-1.93684	0.0527655	0.187485	CENPL	protein_coding
ENSG00000117593.11	1920.25	-0.0803838	0.36647	-0.219346	0.82638	0.920899	DARS2	protein_coding
ENSG00000185278.15	1914.16	-0.0235895	0.37924	-0.0622021	0.950402	0.979945	ZBTB37	protein_coding
ENSG00000135870.11	4150.99	0.410738	0.351465	1.16864	0.242548	0.487378	RC3H1	protein_coding
ENSG00000152061.23	962.13	0.665778	0.345933	1.92458	0.0542815	0.190904	RABGAP1L	protein_coding
ENSG00000203737.3	44.0991	0.303088	0.765752	0.395805	0.692249	0.850993	GPR52	protein_coding
ENSG00000116161.17	2661.8	-0.528142	0.340425	-1.55142	0.120801	0.322126	CACYBP	protein_coding
ENSG00000120333.4	981.482	-0.423619	0.307178	-1.37907	0.167874	0.39264	MRPS14	protein_coding
ENSG00000120332.15	6.06036	0.133889	2.0347	0.0658029	0.947535	NA	TNN	protein_coding
ENSG00000116147.17	6.86765	1.54156	2.20403	0.699427	0.484285	NA	TNR	protein_coding
ENSG00000143207.21	1330.21	0.622107	0.384702	1.61712	0.105853	0.297109	COP1	protein_coding
ENSG00000116183.11	17.8198	-1.81105	1.9164	-0.945024	0.344647	0.591692	PAPPA2	protein_coding
ENSG00000152092.16	8.50782	-1.63276	2.5086	-0.650866	0.515133	NA	ASTN1	protein_coding
ENSG00000198797.7	9.87907	-1.15316	1.43883	-0.801456	0.422868	0.663783	BRINP2	protein_coding
ENSG00000120341.18	20.4111	-0.198368	1.00439	-0.197501	0.843436	0.929997	SEC16B	protein_coding
ENSG00000075391.16	1402.77	0.513358	0.337786	1.51977	0.128568	0.334091	RASAL2	protein_coding
ENSG00000188585.9	3.00088	1.97785	3.2864	0.60183	0.547287	NA	CLEC20A	protein_coding
ENSG00000240021.10	0.807295	-1.35193	5.41537	-0.249646	0.802861	NA	TEX35	protein_coding
ENSG00000116191.17	1993.06	-0.519926	0.371583	-1.39922	0.161747	0.383469	RALGPS2	protein_coding
ENSG00000116194.13	545.46	-0.512277	0.980842	-0.522283	0.601473	0.794338	ANGPTL1	protein_coding
ENSG00000116199.12	2788.14	0.0627384	0.345539	0.181567	0.855923	0.935901	FAM20B	protein_coding
ENSG00000186283.14	999.259	0.0773991	0.337904	0.229057	0.818825	0.917366	TOR3A	protein_coding
ENSG00000143322.20	1847.18	0.144102	0.28723	0.501694	0.615883	0.803585	ABL2	protein_coding
ENSG00000057252.13	2398.38	-0.330459	0.401778	-0.82249	0.410798	0.653828	SOAT1	protein_coding
ENSG00000162779.22	20.6653	1.28566	1.05172	1.22244	0.221543	0.461458	AXDND1	protein_coding
ENSG00000116218.12	1.04056	-2.84239	4.96075	-0.572974	0.566662	NA	NPHS2	protein_coding
ENSG00000162782.16	3.61937	-1.73955	2.46467	-0.705796	0.480315	NA	TDRD5	protein_coding
ENSG00000143340.6	2.44115	0.671871	3.26473	0.205797	0.83695	NA	FAM163A	protein_coding
ENSG00000169905.12	5887.62	0.441034	0.322517	1.36747	0.171477	0.397141	TOR1AIP2	protein_coding
ENSG00000143337.18	1515.07	-0.42018	0.399568	-1.05158	0.29299	0.541486	TOR1AIP1	protein_coding
ENSG00000121454.6	7.92111	0.232826	1.59236	0.146214	0.883752	NA	LHX4	protein_coding
ENSG00000135835.12	10.8297	-0.747993	1.34806	-0.554869	0.578985	0.778559	KIAA1614	protein_coding
ENSG00000162783.10	446.228	-0.16972	0.367077	-0.462356	0.643826	0.820479	IER5	protein_coding
ENSG00000198216.12	17.016	-0.10495	2.28981	-0.0458335	0.963443	0.985417	CACNA1E	protein_coding
ENSG00000179930.5	2.87339	-0.0190189	3.35484	-0.00566909	0.995477	NA	ZNF648	protein_coding
ENSG00000135821.18	14726	0.318433	0.29404	1.08296	0.278827	0.526458	GLUL	protein_coding
ENSG00000203730.2	0.465982	-1.56741	6.77314	-0.231415	0.816992	NA	TEDDM1	protein_coding
ENSG00000121446.20	9.5481	1.1215	2.44566	0.458566	0.646546	0.822716	RGSL1	protein_coding
ENSG00000135828.11	8.71936	0.72624	1.4916	0.486888	0.626338	NA	RNASEL	protein_coding
ENSG00000143333.7	1.67836	-0.128457	3.70426	-0.0346782	0.972336	NA	RGS16	protein_coding
ENSG00000135824.12	4.25615	0.612713	2.96773	0.206459	0.836433	NA	RGS8	protein_coding
ENSG00000135838.13	14.8949	-1.45162	1.44443	-1.00498	0.314906	0.563946	NPL	protein_coding
ENSG00000135829.17	8959.19	0.0539812	0.332371	0.162412	0.870981	0.943307	DHX9	protein_coding
ENSG00000157060.16	2.3763	3.28516	3.36709	0.975667	0.32923	NA	SHCBP1L	protein_coding
ENSG00000135862.6	15093.3	0.527747	0.269637	1.95725	0.0503185	0.181847	LAMC1	protein_coding
ENSG00000058085.14	12.5307	1.9068	1.96785	0.968978	0.332556	0.581105	LAMC2	protein_coding
ENSG00000157064.11	13.399	-0.13674	2.34179	-0.0583911	0.953437	0.981195	NMNAT2	protein_coding
ENSG00000116698.21	3651.44	-0.247201	0.286495	-0.862847	0.388222	0.632555	SMG7	protein_coding
ENSG00000173627.8	2.83107	-0.219414	3.2438	-0.0676408	0.946072	NA	APOBEC4	protein_coding
ENSG00000116667.14	8.87177	-1.65271	1.65436	-0.999	0.317795	NA	C1orf21	protein_coding
ENSG00000135842.17	16.1387	0.215655	1.32428	0.162847	0.870639	0.943075	FAM129A	protein_coding
ENSG00000121486.12	861.135	0.480383	0.341148	1.40814	0.15909	0.379735	TRMT1L	protein_coding
ENSG00000116679.16	2144.89	-0.246115	0.37197	-0.661653	0.508194	0.728771	IVNS1ABP	protein_coding
ENSG00000143341.12	36.9453	0.802419	1.12246	0.714876	0.474685	0.704311	HMCN1	protein_coding
ENSG00000116690.12	4.46123	-3.98069	2.65252	-1.50072	0.133428	NA	PRG4	protein_coding
ENSG00000047410.14	9159.9	0.0776456	0.407348	0.190612	0.848829	0.932847	TPR	protein_coding
ENSG00000157181.16	1091.12	0.491439	0.393151	1.25	0.211299	0.44854	ODR4	protein_coding
ENSG00000262180.1	57.1853	-0.276785	0.615374	-0.449784	0.652866	0.826263	OCLM	protein_coding
ENSG00000116703.13	1.2935	-1.38202	4.2222	-0.327323	0.743424	NA	PDC	protein_coding
ENSG00000073756.12	1.56304	3.33529	3.98217	0.837556	0.40228	NA	PTGS2	protein_coding
ENSG00000116711.10	3.4257	-0.0739746	3.0474	-0.0242747	0.980634	NA	PLA2G4A	protein_coding
ENSG00000162670.11	0.975185	-1.57451	4.76647	-0.33033	0.741151	NA	BRINP3	protein_coding
ENSG00000150681.10	0.624999	2.00987	6.01957	0.33389	0.738463	NA	RGS18	protein_coding
ENSG00000253148.1	0.743831	-3.50487	5.77762	-0.606628	0.544098	NA	RGS21	protein_coding
ENSG00000090104.12	1.49592	0.282934	3.63825	0.0777665	0.938014	NA	RGS1	protein_coding
ENSG00000127074.14	2.39223	-0.190404	3.38339	-0.0562761	0.955122	NA	RGS13	protein_coding
ENSG00000231767.4	30.9905	0.215899	0.943026	0.228943	0.818914	0.917366	AL136454.1	protein_coding
ENSG00000116741.8	35.9034	-0.374322	0.887183	-0.421922	0.673082	0.839248	RGS2	protein_coding
ENSG00000116750.13	1938.79	-0.551028	0.304733	-1.80823	0.0705707	0.227931	UCHL5	protein_coding
ENSG00000116747.12	3686.6	0.216196	0.308469	0.700867	0.483386	0.710137	RO60	protein_coding
ENSG00000023572.9	622.362	-0.156147	0.433073	-0.360555	0.718432	0.866866	GLRX2	protein_coding
ENSG00000134371.12	1787.79	0.391194	0.336121	1.16385	0.244484	0.489467	CDC73	protein_coding
ENSG00000162630.5	4.32403	-0.101199	2.87673	-0.0351783	0.971938	NA	B3GALT2	protein_coding
ENSG00000162687.17	4.03507	0.404643	2.91627	0.138754	0.889645	NA	KCNT2	protein_coding
ENSG00000000971.15	4.4561	1.80822	2.81901	0.641437	0.521239	NA	CFH	protein_coding
ENSG00000116785.13	2.48475	2.65964	3.43696	0.773834	0.439029	NA	CFHR3	protein_coding
ENSG00000244414.6	0.963538	0.901078	4.68241	0.192439	0.847398	NA	CFHR1	protein_coding
ENSG00000134365.13	0.440211	-1.26087	6.96371	-0.181063	0.856318	NA	CFHR4	protein_coding
ENSG00000080910.13	0.611701	0.720207	5.59544	0.128713	0.897585	NA	CFHR2	protein_coding
ENSG00000134389.9	0.751245	3.71738	5.25579	0.707292	0.479385	NA	CFHR5	protein_coding
ENSG00000143278.4	5.8546	-1.36901	1.76055	-0.777604	0.436803	NA	F13B	protein_coding
ENSG00000066279.18	7394.35	-0.192177	0.34345	-0.55955	0.575787	0.776652	ASPM	protein_coding
ENSG00000177888.7	968.18	0.326486	0.379309	0.86074	0.389381	0.633656	ZBTB41	protein_coding
ENSG00000134376.16	3.24819	1.5177	2.88677	0.525742	0.599068	NA	CRB1	protein_coding
ENSG00000213047.13	406.638	-0.615157	0.421557	-1.45925	0.144497	0.358133	DENND1B	protein_coding
ENSG00000203724.11	37.4992	0.573281	0.780179	0.734807	0.462457	0.694782	C1orf53	protein_coding
ENSG00000143355.16	1.2899	-3.198	4.60641	-0.69425	0.487525	NA	LHX9	protein_coding
ENSG00000151414.15	842.142	0.448719	0.371327	1.20842	0.226885	0.468457	NEK7	protein_coding
ENSG00000151418.11	0.86464	1.28067	5.28841	0.242165	0.808652	NA	ATP6V1G3	protein_coding
ENSG00000081237.20	7.38595	-0.952653	2.51747	-0.378417	0.705121	NA	PTPRC	protein_coding
ENSG00000116833.14	57.6577	-1.30655	0.721351	-1.81126	0.0701011	0.22691	NR5A2	protein_coding
ENSG00000162702.8	2782.92	0.561299	0.371644	1.51032	0.130963	0.337781	ZNF281	protein_coding
ENSG00000118193.12	1547.44	-0.0476429	0.363629	-0.131021	0.895759	0.955932	KIF14	protein_coding
ENSG00000118197.14	513.489	0.415445	0.360143	1.15356	0.248682	0.494089	DDX59	protein_coding
ENSG00000118200.14	1444.53	0.390393	0.355067	1.09949	0.271553	0.518844	CAMSAP2	protein_coding
ENSG00000170128.4	0.135194	1.62948	7.05747	0.230888	0.817402	NA	GPR25	protein_coding
ENSG00000081248.11	3.83779	-1.22586	2.89431	-0.423541	0.671901	NA	CACNA1S	protein_coding
ENSG00000232237.3	1.39599	1.21079	3.7081	0.326526	0.744026	NA	ASCL5	protein_coding
ENSG00000116857.17	949.594	-0.475642	0.401988	-1.18322	0.23672	0.480849	TMEM9	protein_coding
ENSG00000163395.16	14.9926	2.15506	1.1867	1.81601	0.0693696	0.225664	IGFN1	protein_coding
ENSG00000081277.12	1.50401	-0.735197	4.10505	-0.179096	0.857862	NA	PKP1	protein_coding
ENSG00000118194.19	8.19338	0.540061	1.54722	0.349054	0.727049	NA	TNNT2	protein_coding
ENSG00000159173.19	4.14044	0.0147363	2.09739	0.00702604	0.994394	NA	TNNI1	protein_coding
ENSG00000174307.6	1067.54	0.470994	0.734583	0.641172	0.521411	0.737492	PHLDA3	protein_coding
ENSG00000134369.15	21.2141	0.628495	1.10052	0.571087	0.567941	0.771152	NAV1	protein_coding
ENSG00000198892.6	17.3656	-1.9209	1.1065	-1.73602	0.0825597	0.253381	SHISA4	protein_coding
ENSG00000163431.13	2.62316	0.43037	2.76848	0.155454	0.876464	NA	LMOD1	protein_coding
ENSG00000134375.11	1521.29	-0.15294	0.352465	-0.433917	0.664349	0.833918	TIMM17A	protein_coding
ENSG00000176393.11	1992.39	0.14873	0.363332	0.409351	0.682282	0.844193	RNPEP	protein_coding
ENSG00000170075.9	5.9472	-1.46002	2.31233	-0.631406	0.527775	NA	GPR37L1	protein_coding
ENSG00000143862.8	713.524	-0.0897466	0.459131	-0.195471	0.845024	0.931058	ARL8A	protein_coding
ENSG00000143851.15	4.95331	2.60769	2.71889	0.959102	0.337508	NA	PTPN7	protein_coding
ENSG00000133067.17	7.44998	-0.217421	1.68641	-0.128925	0.897417	NA	LGR6	protein_coding
ENSG00000077157.22	1358.79	0.323313	0.310793	1.04028	0.298208	0.547233	PPP1R12B	protein_coding
ENSG00000143858.12	5.55039	-0.379932	2.19891	-0.172782	0.862823	NA	SYT2	protein_coding
ENSG00000183155.4	387.424	-0.335589	0.366502	-0.915655	0.359848	0.605718	RABIF	protein_coding
ENSG00000159348.13	520.832	0.116947	0.367071	0.318596	0.750033	0.883433	CYB5R1	protein_coding
ENSG00000163444.12	1548.18	-0.120573	0.298451	-0.403996	0.686216	0.846755	TMEM183A	protein_coding
ENSG00000122180.5	0.226342	-2.34658	6.99319	-0.335552	0.737209	NA	MYOG	protein_coding
ENSG00000163485.17	3.63655	5.21625	2.82816	1.8444	0.0651252	NA	ADORA1	protein_coding
ENSG00000133055.9	0.732184	0.705198	5.30131	0.133023	0.894175	NA	MYBPH	protein_coding
ENSG00000133048.13	2.41299	-2.64017	2.98485	-0.884524	0.376413	NA	CHI3L1	protein_coding
ENSG00000133063.16	3.7065	0.882776	3.01425	0.292867	0.769624	NA	CHIT1	protein_coding
ENSG00000122176.12	2.19504	1.97799	3.00186	0.65892	0.509947	NA	FMOD	protein_coding
ENSG00000188783.6	2.16044	-1.11041	3.15609	-0.351832	0.724964	NA	PRELP	protein_coding
ENSG00000188770.9	0.12467	-1.44765	7.05512	-0.205192	0.837422	NA	OPTC	protein_coding
ENSG00000058668.14	964.4	0.05385	0.304863	0.176637	0.859794	0.937408	ATP2B4	protein_coding
ENSG00000122188.12	1.36328	-1.30458	3.99113	-0.32687	0.743766	NA	LAX1	protein_coding
ENSG00000058673.16	60.6155	0.868462	0.611866	1.41937	0.155792	0.374714	ZC3H11A	protein_coding
ENSG00000257315.2	384.495	0.261186	0.458516	0.569634	0.568926	0.771744	ZBED6	protein_coding
ENSG00000182004.13	2151.63	-0.370866	0.314842	-1.17795	0.238818	0.483111	SNRPE	protein_coding
ENSG00000143845.15	547.213	-0.208821	0.45657	-0.457369	0.647406	0.823224	ETNK2	protein_coding
ENSG00000143839.15	3.42315	2.69916	2.75058	0.981303	0.326443	NA	REN	protein_coding
ENSG00000170498.9	10.6258	0.382086	1.34192	0.28473	0.775851	0.897416	KISS1	protein_coding
ENSG00000174567.8	466.345	0.257739	0.412143	0.625361	0.531734	0.745332	GOLT1A	protein_coding
ENSG00000158615.9	3437.45	-0.149718	0.286619	-0.522359	0.60142	0.794338	PPP1R15B	protein_coding
ENSG00000133056.13	863.144	-0.288	0.348793	-0.825706	0.408971	0.651862	PIK3C2B	protein_coding
ENSG00000170382.12	0.907019	0.239171	5.1955	0.0460342	0.963283	NA	LRRN2	protein_coding
ENSG00000163531.15	18.1299	2.38623	1.94165	1.22897	0.219083	0.45779	NFASC	protein_coding
ENSG00000184144.12	2.38711	1.68878	3.2692	0.516572	0.605455	NA	CNTN2	protein_coding
ENSG00000174529.7	52.5076	0.986372	0.67674	1.45753	0.144969	0.358624	TMEM81	protein_coding
ENSG00000117222.14	1418.96	0.00171822	0.328833	0.00522519	0.995831	0.997863	RBBP5	protein_coding
ENSG00000133059.17	690.754	0.613566	0.315039	1.94759	0.0514643	0.184209	DSTYK	protein_coding
ENSG00000133069.17	58.3266	-0.623475	0.751569	-0.829565	0.406785	0.649863	TMCC2	protein_coding
ENSG00000163545.8	464.225	0.435781	0.387704	1.12401	0.261011	0.507416	NUAK2	protein_coding
ENSG00000162873.14	1.65171	-0.0325303	3.93062	-0.00827611	0.993397	NA	KLHDC8A	protein_coding
ENSG00000186007.10	29.1359	-0.576761	0.828377	-0.696255	0.486269	0.712498	LEMD1	protein_coding
ENSG00000281406.2	259.65	-0.41665	0.412099	-1.01104	0.311995	0.561191	BLACAT1	protein_coding
ENSG00000158711.13	3655.23	0.208202	0.365589	0.569498	0.569018	0.771813	ELK4	protein_coding
ENSG00000158715.6	155.152	-0.788674	0.45414	-1.73663	0.0824523	0.253304	SLC45A3	protein_coding
ENSG00000069275.13	11019.4	-0.0645293	0.333067	-0.193743	0.846377	0.931817	NUCKS1	protein_coding
ENSG00000117280.13	472.44	-0.509984	0.330824	-1.54156	0.123181	0.326227	RAB29	protein_coding
ENSG00000133065.11	637.225	-0.423419	0.330314	-1.28187	0.199888	0.433627	SLC41A1	protein_coding
ENSG00000162877.13	1.65116	0.311151	4.00925	0.0776083	0.93814	NA	PM20D1	protein_coding
ENSG00000276600.5	11.7783	1.28373	1.40494	0.913725	0.360862	0.606593	RAB7B	protein_coding
ENSG00000263961.8	13.6525	1.89794	1.20037	1.58113	0.113848	0.31025	RHEX	protein_coding
ENSG00000198049.7	4.1431	-1.09028	2.17928	-0.500295	0.616867	NA	AVPR1B	protein_coding
ENSG00000143486.16	1645.19	0.252846	0.304481	0.830418	0.406303	0.649515	EIF2D	protein_coding
ENSG00000143479.16	130.634	-0.467888	0.488284	-0.95823	0.337947	0.586002	DYRK3	protein_coding
ENSG00000162889.10	1873.97	-0.234306	0.349515	-0.670374	0.502619	0.724371	MAPKAPK2	protein_coding
ENSG00000136634.6	1.00915	0.369978	4.18282	0.0884518	0.929518	NA	IL10	protein_coding
ENSG00000142224.15	1.10065	-1.17191	4.62162	-0.253572	0.799826	NA	IL19	protein_coding
ENSG00000162891.10	0.203345	-2.20785	7.00069	-0.315376	0.752476	NA	IL20	protein_coding
ENSG00000162894.12	0.610288	2.05501	6.10014	0.336879	0.736208	NA	FCMR	protein_coding
ENSG00000162896.6	14.3008	0.412145	1.1706	0.35208	0.724778	0.870922	PIGR	protein_coding
ENSG00000162897.15	1.86862	1.1184	3.71542	0.301016	0.763403	NA	FCAMR	protein_coding
ENSG00000182795.13	137.561	-0.0686197	0.464953	-0.147584	0.882671	0.949268	C1orf116	protein_coding
ENSG00000123836.15	1058.19	-0.0115985	0.354151	-0.03275	0.973874	0.989235	PFKFB2	protein_coding
ENSG00000180667.10	1551.03	-0.240439	0.34781	-0.691293	0.489381	0.714838	YOD1	protein_coding
ENSG00000123843.13	922.059	0.581279	0.344333	1.68813	0.0913863	0.269238	C4BPB	protein_coding
ENSG00000123838.11	544.307	0.639459	0.411657	1.55338	0.120333	0.321226	C4BPA	protein_coding
ENSG00000196352.15	1240.78	0.557691	0.381853	1.46049	0.144156	0.357785	CD55	protein_coding
ENSG00000117322.17	7.47656	2.44975	2.33075	1.05105	0.293234	NA	CR2	protein_coding
ENSG00000203710.11	7.03601	2.63318	2.32869	1.13076	0.258158	NA	CR1	protein_coding
ENSG00000197721.16	1.58689	-0.624211	3.93486	-0.158636	0.873956	NA	CR1L	protein_coding
ENSG00000174059.16	2.63602	-0.364632	3.33798	-0.109238	0.913014	NA	CD34	protein_coding
ENSG00000076356.7	1568.79	0.382501	0.380374	1.00559	0.314613	0.563732	PLXNA2	protein_coding
ENSG00000123689.6	1.99909	-2.44708	3.47971	-0.703242	0.481905	NA	G0S2	protein_coding
ENSG00000117594.10	0.81422	-2.42035	5.43205	-0.445568	0.655909	NA	HSD11B1	protein_coding
ENSG00000009790.15	1.15236	-1.57558	4.53004	-0.347808	0.727984	NA	TRAF3IP3	protein_coding
ENSG00000162757.4	42.802	0.422062	0.750534	0.562349	0.573878	0.775128	C1orf74	protein_coding
ENSG00000117595.12	5.32867	-1.40229	2.49613	-0.561788	0.57426	NA	IRF6	protein_coding
ENSG00000117597.18	1082.23	0.0596973	0.370695	0.161042	0.872061	0.943955	UTP25	protein_coding
ENSG00000143469.19	15.8019	1.21688	2.26245	0.537858	0.590675	0.786685	SYT14	protein_coding
ENSG00000082497.12	1.06938	2.74894	4.2271	0.650315	0.515489	NA	SERTAD4	protein_coding
ENSG00000143473.13	6.48069	-1.65079	2.31911	-0.711823	0.476574	NA	KCNH1	protein_coding
ENSG00000284299.1	0.395058	1.1018	6.97585	0.157945	0.8745	NA	AL590132.1	protein_coding
ENSG00000117625.13	1160.07	0.496513	0.32653	1.52057	0.128367	0.333827	RCOR3	protein_coding
ENSG00000198570.5	1.28075	3.24101	4.63105	0.699843	0.484025	NA	RD3	protein_coding
ENSG00000117650.13	1288.61	-0.637306	0.353176	-1.8045	0.071153	0.229274	NEK2	protein_coding
ENSG00000123684.13	3620.97	-0.0984056	0.331203	-0.297116	0.766378	0.892465	LPGAT1	protein_coding
ENSG00000066027.12	1156.67	0.41843	0.423601	0.987793	0.323254	0.572353	PPP2R5A	protein_coding
ENSG00000065600.12	365.471	-0.522217	0.3428	-1.52339	0.127662	0.332762	TMEM206	protein_coding
ENSG00000117691.10	530.654	-0.438673	0.405288	-1.08237	0.279087	0.526694	NENF	protein_coding
ENSG00000162772.17	617.418	0.60801	0.396192	1.53464	0.124873	0.328524	ATF3	protein_coding
ENSG00000162771.7	1.86996	4.28082	3.1913	1.3414	0.179789	NA	FAM71A	protein_coding
ENSG00000123685.9	5.54336	-0.272302	2.47582	-0.109985	0.912422	NA	BATF3	protein_coding
ENSG00000203705.11	137.333	0.262531	0.502705	0.522237	0.601505	0.794338	TATDN3	protein_coding
ENSG00000185523.6	1.42041	-1.63003	3.86267	-0.421995	0.673028	NA	SPATA45	protein_coding
ENSG00000162769.13	1767.85	-0.159218	0.314025	-0.507023	0.612138	0.801598	FLVCR1	protein_coding
ENSG00000174606.14	1116.91	-0.436507	0.357866	-1.21975	0.22256	0.462644	ANGEL2	protein_coding
ENSG00000117707.15	10485.7	-0.0899718	0.301048	-0.298862	0.765045	0.891758	PROX1	protein_coding
ENSG00000152104.12	2055.67	-0.136537	0.301061	-0.453518	0.650176	0.824541	PTPN14	protein_coding
ENSG00000117724.13	10701.4	0.492726	0.379901	1.29699	0.194636	0.42644	CENPF	protein_coding
ENSG00000082482.13	2.67862	0.848637	3.19514	0.265602	0.790546	NA	KCNK2	protein_coding
ENSG00000136636.13	2685.89	-0.635347	0.360875	-1.76057	0.0783109	0.24509	KCTD3	protein_coding
ENSG00000042781.13	21.131	1.37957	1.26271	1.09255	0.27459	0.521313	USH2A	protein_coding
ENSG00000196482.17	6.94553	0.820625	2.5553	0.321147	0.748099	NA	ESRRG	protein_coding
ENSG00000092978.11	841.368	0.0852896	0.369523	0.23081	0.817462	0.917008	GPATCH2	protein_coding
ENSG00000067533.6	1272.69	-0.145007	0.361513	-0.401112	0.688338	0.848254	RRP15	protein_coding
ENSG00000092969.12	9.8579	1.06889	1.56172	0.684428	0.493705	0.718216	TGFB2	protein_coding
ENSG00000143353.12	702.625	-0.0783008	0.325674	-0.240427	0.809999	0.913611	LYPLAL1	protein_coding
ENSG00000215817.7	17.3799	0.226621	1.05247	0.215324	0.829515	0.922664	ZC3H11B	protein_coding
ENSG00000196660.10	232.809	-0.358802	0.421944	-0.850355	0.395128	0.638669	SLC30A10	protein_coding
ENSG00000162813.18	646.155	0.302888	0.35697	0.848496	0.396162	0.639761	BPNT1	protein_coding
ENSG00000067704.10	5453.42	0.312157	0.351343	0.888468	0.374289	0.620102	IARS2	protein_coding
ENSG00000116141.15	9.05121	2.4424	2.17554	1.12267	0.26158	NA	MARK1	protein_coding
ENSG00000117791.16	188.505	0.691955	0.446966	1.54811	0.121595	0.323484	MARC2	protein_coding
ENSG00000136630.13	15.6001	-0.396844	1.28481	-0.308874	0.757417	0.887853	HLX	protein_coding
ENSG00000143512.13	23.8931	-0.182442	0.947335	-0.192585	0.847284	0.93216	HHIPL2	protein_coding
ENSG00000143498.18	357.232	-0.225001	0.362034	-0.621492	0.534276	0.747012	TAF1A	protein_coding
ENSG00000154305.17	3249.24	0.509601	0.371052	1.37339	0.16963	0.395098	MIA3	protein_coding
ENSG00000186063.13	1441.09	-0.858894	0.43973	-1.95323	0.0507925	0.182857	AIDA	protein_coding
ENSG00000162819.12	1466.1	0.161553	0.412762	0.391395	0.695505	0.853121	BROX	protein_coding
ENSG00000197520.10	3.36463	4.60058	2.8399	1.61998	0.105237	NA	FAM177B	protein_coding
ENSG00000187554.13	1.82058	0.595907	3.62123	0.164559	0.869291	NA	TLR5	protein_coding
ENSG00000143502.15	2.67965	1.61535	3.22108	0.501493	0.616024	NA	SUSD4	protein_coding
ENSG00000178395.6	0.101672	-1.29892	7.06196	-0.183933	0.854066	NA	CCDC185	protein_coding
ENSG00000203697.11	8.45725	1.17705	1.54547	0.761613	0.446291	NA	CAPN8	protein_coding
ENSG00000143514.17	1205.29	0.200007	0.312751	0.63951	0.522491	0.738382	TP53BP2	protein_coding
ENSG00000143756.12	1431.72	0.0755593	0.396077	0.190769	0.848706	0.932847	FBXO28	protein_coding
ENSG00000143748.18	790.49	0.129976	0.315623	0.411807	0.680481	0.843208	NVL	protein_coding
ENSG00000143786.8	50.2445	-1.17358	0.675288	-1.7379	0.0822282	0.252917	CNIH3	protein_coding
ENSG00000185842.15	753.343	0.0936983	0.354411	0.264378	0.791489	0.905335	DNAH14	protein_coding
ENSG00000154380.17	7636.03	0.0412414	0.2958	0.139423	0.889116	0.953068	ENAH	protein_coding
ENSG00000143742.13	5262.55	-0.0474076	0.341206	-0.138942	0.889496	0.953213	SRP9	protein_coding
ENSG00000143819.12	4240.16	0.427913	0.377784	1.13269	0.257343	0.50376	EPHX1	protein_coding
ENSG00000196187.12	1919.54	0.389164	0.376077	1.0348	0.300764	0.550004	TMEM63A	protein_coding
ENSG00000243709.1	8.53219	-2.46551	2.06513	-1.19388	0.232527	NA	LEFTY1	protein_coding
ENSG00000143811.19	803.861	-0.702189	0.420164	-1.67123	0.094677	0.27534	PYCR2	protein_coding
ENSG00000143768.13	26.9507	-1.77374	0.910294	-1.94854	0.0513505	0.183955	LEFTY2	protein_coding
ENSG00000143751.10	1435.81	0.184137	0.301927	0.609872	0.541946	0.753656	SDE2	protein_coding
ENSG00000163041.10	1299.09	0.0301822	0.435231	0.0693476	0.944713	0.978437	H3F3A	protein_coding
ENSG00000185155.11	209.797	-0.531369	0.553555	-0.95992	0.337096	0.58507	MIXL1	protein_coding
ENSG00000183814.15	645.767	-0.0174501	0.413092	-0.0422428	0.966305	0.986688	LIN9	protein_coding
ENSG00000203685.10	13.7319	1.72012	2.35153	0.731488	0.464481	0.696503	STUM	protein_coding
ENSG00000143772.9	12.0097	3.61458	2.35499	1.53486	0.124818	0.328524	ITPKB	protein_coding
ENSG00000143801.17	475.82	0.162559	0.388534	0.41839	0.675662	0.840396	PSEN2	protein_coding
ENSG00000181450.17	493.071	-0.544621	0.398029	-1.36829	0.17122	0.396826	ZNF678	protein_coding
ENSG00000143740.14	719.116	0.253106	0.355767	0.711438	0.476813	0.705982	SNAP47	protein_coding
ENSG00000185888.5	0.729445	0.922589	5.67581	0.162548	0.870875	NA	PRSS38	protein_coding
ENSG00000154342.6	1.70711	2.66983	3.88766	0.686744	0.492244	NA	WNT3A	protein_coding
ENSG00000143761.16	10576.3	-0.160822	0.389994	-0.412371	0.680068	0.843162	ARF1	protein_coding
ENSG00000162910.19	567.769	-0.654917	0.47173	-1.38833	0.165036	0.388738	MRPL55	protein_coding
ENSG00000143774.16	1552.36	-0.300658	0.406759	-0.739154	0.459813	0.693143	GUK1	protein_coding
ENSG00000198835.4	69.0344	-0.115485	0.592503	-0.194911	0.845463	0.93128	GJC2	protein_coding
ENSG00000181873.13	864.485	-0.292915	0.314426	-0.931585	0.351551	0.597486	IBA57	protein_coding
ENSG00000154358.20	48.8906	0.707375	0.69555	1.017	0.309153	0.557731	OBSCN	protein_coding
ENSG00000154370.16	1524.73	0.549435	0.398062	1.38028	0.167501	0.391954	TRIM11	protein_coding
ENSG00000162931.12	21.8342	-1.50007	1.02838	-1.45867	0.144656	0.358257	TRIM17	protein_coding
ENSG00000181218.5	0.374834	0.998771	6.98099	0.14307	0.886235	NA	HIST3H2A	protein_coding
ENSG00000196890.4	0.101672	-1.29892	7.06196	-0.183933	0.854066	NA	HIST3H2BB	protein_coding
ENSG00000168159.12	1663.69	0.105621	0.399235	0.264558	0.79135	0.90523	RNF187	protein_coding
ENSG00000168118.11	2861.23	-0.222675	0.278551	-0.799404	0.424056	0.664273	RAB4A	protein_coding
ENSG00000154429.11	1381.45	-0.633189	0.376659	-1.68107	0.0927498	0.271585	CCSAP	protein_coding
ENSG00000069248.12	2580.21	-0.103636	0.340668	-0.304215	0.760964	0.889915	NUP133	protein_coding
ENSG00000135776.5	1221.29	-0.301666	0.302235	-0.998119	0.318222	0.567815	ABCB10	protein_coding
ENSG00000135801.9	937.562	-0.0526977	0.303188	-0.173812	0.862013	0.938376	TAF5L	protein_coding
ENSG00000143641.10	4372.92	0.0983728	0.362662	0.271252	0.786197	0.902471	GALNT2	protein_coding
ENSG00000177614.11	26.8519	-0.50348	0.984009	-0.511662	0.608888	0.799504	PGBD5	protein_coding
ENSG00000135775.14	2023.16	0.405388	0.332137	1.22054	0.222258	0.462311	COG2	protein_coding
ENSG00000135773.13	48.8318	0.765214	0.986366	0.77579	0.437873	0.675677	CAPN9	protein_coding
ENSG00000143643.13	952.444	0.287085	0.376411	0.762692	0.445647	0.682092	TTC13	protein_coding
ENSG00000173409.14	318.487	-0.0401192	0.446607	-0.089831	0.928422	0.970365	ARV1	protein_coding
ENSG00000182118.8	123.961	-0.566409	0.515407	-1.09895	0.271788	0.519204	FAM89A	protein_coding
ENSG00000119283.15	12.468	-0.224141	1.41409	-0.158506	0.874058	0.944868	TRIM67	protein_coding
ENSG00000235710.5	0.453933	4.40043	6.96432	0.631854	0.527482	NA	AL109810.2	protein_coding
ENSG00000143633.13	629.86	-0.0962065	0.354428	-0.271442	0.786051	0.902427	C1orf131	protein_coding
ENSG00000116906.13	2805.05	-0.499224	0.337825	-1.47776	0.139472	0.350546	GNPAT	protein_coding
ENSG00000010072.16	877.851	0.433565	0.345839	1.25366	0.209966	0.447063	SPRTN	protein_coding
ENSG00000135766.8	2656.12	-0.283783	0.286182	-0.991615	0.321385	0.570601	EGLN1	protein_coding
ENSG00000270106.6	20.0596	0.116967	0.960048	0.121835	0.90303	0.958948	TSNAX-DISC1	protein_coding
ENSG00000116918.14	898.314	0.443638	0.358969	1.23587	0.216508	0.45483	TSNAX	protein_coding
ENSG00000162946.22	973.935	-0.675721	0.364961	-1.85149	0.0640991	0.213911	DISC1	protein_coding
ENSG00000116991.10	52.8092	1.14885	0.841941	1.36453	0.1724	0.397984	SIPA1L2	protein_coding
ENSG00000212916.4	1.29737	1.38715	4.67235	0.296884	0.766555	NA	MAP10	protein_coding
ENSG00000135749.19	26.7671	1.66083	1.34587	1.23402	0.217197	0.455487	PCNX2	protein_coding
ENSG00000143674.11	3.94099	-1.02503	2.38404	-0.429954	0.667229	NA	MAP3K21	protein_coding
ENSG00000135750.14	1.59101	-1.18167	4.07156	-0.290225	0.771644	NA	KCNK1	protein_coding
ENSG00000183780.13	4.78578	-1.0127	2.81943	-0.359188	0.719455	NA	SLC35F3	protein_coding
ENSG00000168275.15	978.436	-0.333215	0.332718	-1.00149	0.316589	0.566033	COA6	protein_coding
ENSG00000059588.10	2103.34	0.0188587	0.362202	0.0520668	0.958475	0.983717	TARBP1	protein_coding
ENSG00000168264.10	10812.8	-0.0203351	0.280482	-0.0725006	0.942203	0.977224	IRF2BP2	protein_coding
ENSG00000173726.11	13114.3	-0.212466	0.320729	-0.662447	0.507685	0.728252	TOMM20	protein_coding
ENSG00000188739.15	75.4823	0.068155	0.614979	0.110825	0.911755	0.962988	RBM34	protein_coding
ENSG00000152904.11	335.455	-0.101889	0.524568	-0.194235	0.845992	0.931657	GGPS1	protein_coding
ENSG00000285053.1	116.006	0.039246	0.471482	0.0832397	0.933661	0.973515	TBCE	protein_coding
ENSG00000162885.13	1851.3	0.629817	0.363793	1.73125	0.0834068	0.254483	B3GALNT2	protein_coding
ENSG00000143669.13	234.693	0.422608	0.44133	0.957578	0.338275	0.586237	LYST	protein_coding
ENSG00000116977.18	3076.43	0.24542	0.349164	0.702878	0.482132	0.709332	LGALS8	protein_coding
ENSG00000119285.11	6383.03	-0.35622	0.314773	-1.13167	0.257772	0.504249	HEATR1	protein_coding
ENSG00000077522.13	6.59687	0.183735	1.76049	0.104366	0.916879	NA	ACTN2	protein_coding
ENSG00000116984.13	3494.68	-0.145617	0.289711	-0.502627	0.615227	0.803209	MTR	protein_coding
ENSG00000198626.16	29.9571	0.809484	1.16923	0.692325	0.488733	0.71437	RYR2	protein_coding
ENSG00000116996.9	0.250165	2.54851	6.99318	0.364428	0.715538	NA	ZP4	protein_coding
ENSG00000133019.11	2.52091	0.825334	2.93232	0.281461	0.778357	NA	CHRM3	protein_coding
ENSG00000155816.20	2.91737	-0.504599	2.7874	-0.181028	0.856345	NA	FMN2	protein_coding
ENSG00000180875.5	1.19265	0.053049	4.30314	0.012328	0.990164	NA	GREM2	protein_coding
ENSG00000182901.16	2.82794	3.72841	2.86793	1.30004	0.193589	NA	RGS7	protein_coding
ENSG00000091483.6	1701.4	-0.494523	0.355309	-1.39181	0.16398	0.387175	FH	protein_coding
ENSG00000117009.12	3.00503	1.73587	3.18304	0.545352	0.585512	NA	KMO	protein_coding
ENSG00000054277.14	174.502	-0.322999	0.45134	-0.715644	0.474211	0.703863	OPN3	protein_coding
ENSG00000162843.17	2.14804	2.42955	3.34177	0.727026	0.46721	NA	WDR64	protein_coding
ENSG00000196289.7	0.101672	-1.29892	7.06196	-0.183933	0.854066	NA	BECN2	protein_coding
ENSG00000197769.5	0.362987	0.985263	6.99766	0.140799	0.888029	NA	MAP1LC3C	protein_coding
ENSG00000173728.10	0.913944	-0.390206	5.70792	-0.0683622	0.945497	NA	C1orf100	protein_coding
ENSG00000179397.18	74.7676	0.221313	0.584042	0.378934	0.704737	0.858286	CATSPERE	protein_coding
ENSG00000121644.19	2898.57	-0.0430994	0.326141	-0.13215	0.894866	0.955623	DESI2	protein_coding
ENSG00000284188.2	0.12467	-1.44765	7.05512	-0.205192	0.837422	NA	AL451007.3	protein_coding
ENSG00000203667.10	1738.28	-0.246668	0.352625	-0.69952	0.484227	0.710831	COX20	protein_coding
ENSG00000153187.20	25197.3	-0.162918	0.334018	-0.487753	0.625725	0.810344	HNRNPU	protein_coding
ENSG00000203666.12	430.755	0.244922	0.357287	0.685505	0.493025	0.71744	EFCAB2	protein_coding
ENSG00000162851.8	753.828	0.0370416	0.363231	0.101978	0.918774	0.966527	TFB2M	protein_coding
ENSG00000162852.14	902.908	0.316409	0.347359	0.910899	0.362348	0.608208	CNST	protein_coding
ENSG00000153207.15	5760.82	0.067809	0.398131	0.170318	0.86476	0.939366	AHCTF1	protein_coding
ENSG00000135747.11	84.0115	-0.712585	0.559326	-1.27401	0.202661	0.437045	ZNF670-ZNF695	protein_coding
ENSG00000277462.2	744.109	-0.194517	0.358725	-0.542247	0.587649	0.784463	ZNF670	protein_coding
ENSG00000188295.14	332.18	0.077092	0.398344	0.193531	0.846543	0.931905	ZNF669	protein_coding
ENSG00000196418.12	2041.6	0.371086	0.468007	0.792908	0.427831	0.667843	ZNF124	protein_coding
ENSG00000162714.12	1777.19	-0.459546	0.338136	-1.35906	0.174128	0.399667	ZNF496	protein_coding
ENSG00000162711.17	0.977943	-0.912286	5.08414	-0.179438	0.857594	NA	NLRP3	protein_coding
ENSG00000177535.8	1.15831	-2.03133	4.72758	-0.429677	0.667431	NA	OR2B11	protein_coding
ENSG00000169224.13	2.05561	-2.071	3.46607	-0.597508	0.550168	NA	GCSAML	protein_coding
ENSG00000196242.9	0.216643	0.110366	7.05779	0.0156375	0.987524	NA	OR2C3	protein_coding
ENSG00000177476.3	0.12467	-1.44765	7.05512	-0.205192	0.837422	NA	OR2G3	protein_coding
ENSG00000197437.4	0.387897	-3.89022	6.981	-0.557258	0.577351	NA	OR13G1	protein_coding
ENSG00000169214.4	0.135194	1.62948	7.05747	0.230888	0.817402	NA	OR6F1	protein_coding
ENSG00000241128.2	0.23964	-0.0383796	7.05095	-0.00544319	0.995657	NA	OR14A2	protein_coding
ENSG00000153230.4	0.12467	-1.44765	7.05512	-0.205192	0.837422	NA	OR14K1	protein_coding
ENSG00000221888.4	0.236866	0.228511	7.05224	0.0324026	0.974151	NA	OR1C1	protein_coding
ENSG00000162722.9	1.80601	2.22226	4.02328	0.55235	0.580709	NA	TRIM58	protein_coding
ENSG00000238243.3	0.114971	1.51136	7.06302	0.213981	0.830562	NA	OR2W3	protein_coding
ENSG00000177462.7	0.48898	-1.65474	6.95977	-0.237758	0.812069	NA	OR2T8	protein_coding
ENSG00000177275.4	0.114971	1.51136	7.06302	0.213981	0.830562	NA	OR2AJ1	protein_coding
ENSG00000197454.2	0.385359	3.16979	6.96711	0.454965	0.649135	NA	OR2L5	protein_coding
ENSG00000203663.4	0.779591	0.0740234	6.07183	0.0121913	0.990273	NA	OR2L2	protein_coding
ENSG00000198128.4	0.351012	-2.97716	6.96682	-0.427334	0.669136	NA	OR2L3	protein_coding
ENSG00000196071.5	0.12467	-1.44765	7.05512	-0.205192	0.837422	NA	OR2L13	protein_coding
ENSG00000162727.3	0.257715	-2.90142	7.05376	-0.41133	0.680831	NA	OR2M5	protein_coding
ENSG00000198601.3	0.12467	-1.44765	7.05512	-0.205192	0.837422	NA	OR2M2	protein_coding
ENSG00000228198.3	1.04694	-1.05041	4.91986	-0.213505	0.830933	NA	OR2M3	protein_coding
ENSG00000171180.2	0.801747	-1.04099	5.47774	-0.19004	0.849278	NA	OR2M4	protein_coding
ENSG00000177212.4	0.351837	1.14753	6.9879	0.164217	0.869561	NA	OR2T33	protein_coding
ENSG00000177201.2	0.579579	1.41981	5.7796	0.24566	0.805946	NA	OR2T12	protein_coding
ENSG00000177186.3	0.203345	-2.20785	7.00069	-0.315376	0.752476	NA	OR2M7	protein_coding
ENSG00000177174.1	0.23964	-0.0383796	7.05095	-0.00544319	0.995657	NA	OR14C36	protein_coding
ENSG00000196944.4	0.114971	1.51136	7.06302	0.213981	0.830562	NA	OR2T4	protein_coding
ENSG00000198104.3	1.11178	1.00039	4.93505	0.202711	0.839361	NA	OR2T6	protein_coding
ENSG00000175143.4	0.114971	1.51136	7.06302	0.213981	0.830562	NA	OR2T1	protein_coding
ENSG00000196240.4	0.114971	1.51136	7.06302	0.213981	0.830562	NA	OR2T2	protein_coding
ENSG00000188558.6	0.610288	2.05501	6.10014	0.336879	0.736208	NA	OR2G6	protein_coding
ENSG00000182783.5	0.469582	1.47078	6.96017	0.211313	0.832643	NA	OR2T29	protein_coding
ENSG00000183310.3	0.331614	1.0381	6.99377	0.148432	0.882002	NA	OR2T34	protein_coding
ENSG00000184022.4	0.919492	-0.64445	4.75453	-0.135544	0.892181	NA	OR2T10	protein_coding
ENSG00000279301.4	0.486206	-1.45177	6.66846	-0.217707	0.827658	NA	OR2T11	protein_coding
ENSG00000177151.4	0.405583	3.23963	6.96482	0.465143	0.641829	NA	OR2T35	protein_coding
ENSG00000259823.6	0.226342	-2.34658	6.99319	-0.335552	0.737209	NA	LYPD8	protein_coding
ENSG00000175137.11	927.743	-0.481417	0.408105	-1.17964	0.238144	0.482483	SH3BP5L	protein_coding
ENSG00000171161.13	1106.86	-0.32066	0.382292	-0.838782	0.401591	0.644976	ZNF672	protein_coding
ENSG00000171163.15	596.117	0.335388	0.378915	0.885127	0.376088	0.621687	ZNF692	protein_coding
ENSG00000185220.12	331.131	0.202232	0.360072	0.561643	0.574359	0.775451	PGBD2	protein_coding
ENSG00000184731.6	155.72	-0.369119	0.520466	-0.709209	0.478195	0.706803	FAM110C	protein_coding
ENSG00000143727.16	6516.92	0.225568	0.293035	0.769767	0.441438	0.678554	ACP1	protein_coding
ENSG00000189292.16	5.06103	1.21648	2.0105	0.605065	0.545136	NA	ALKAL2	protein_coding
ENSG00000151353.15	1075.37	-0.0976297	0.335188	-0.291269	0.770846	0.89475	TMEM18	protein_coding
ENSG00000172554.12	5.57014	-0.178913	2.72074	-0.065759	0.94757	NA	SNTG2	protein_coding
ENSG00000115705.21	2.61826	-0.0161733	3.2862	-0.00492159	0.996073	NA	TPO	protein_coding
ENSG00000130508.11	269.958	2.88994	1.65999	1.74094	0.0816945	0.251867	PXDN	protein_coding
ENSG00000186487.19	11.7634	-0.107117	2.37959	-0.0450149	0.964095	0.985691	MYT1L	protein_coding
ENSG00000032389.12	1796.11	-0.0882002	0.358755	-0.245851	0.805797	0.911862	EIPR1	protein_coding
ENSG00000171853.16	2894.93	0.219981	0.363402	0.605339	0.544953	0.755682	TRAPPC12	protein_coding
ENSG00000182551.14	5231.19	0.0982647	0.304595	0.322608	0.746992	0.882021	ADI1	protein_coding
ENSG00000171865.10	3193.38	-0.093729	0.282702	-0.331547	0.740231	0.878527	RNASEH1	protein_coding
ENSG00000171863.14	36308.4	-0.155391	0.320213	-0.485273	0.627483	0.811604	RPS7	protein_coding
ENSG00000118004.17	381.892	0.118473	0.38338	0.309023	0.757304	0.887796	COLEC11	protein_coding
ENSG00000214866.8	2.83989	-0.647013	2.78718	-0.232139	0.81643	NA	DCDC2C	protein_coding
ENSG00000134326.11	21.4474	-0.98784	1.07994	-0.914714	0.360342	0.606238	CMPK2	protein_coding
ENSG00000134321.12	2.00787	1.51287	3.45265	0.438177	0.661258	NA	RSAD2	protein_coding
ENSG00000143797.12	33.0733	0.171448	0.953272	0.179852	0.857269	0.93661	MBOAT2	protein_coding
ENSG00000151693.11	2964.55	-0.592153	0.313589	-1.88831	0.0589845	0.202088	ASAP2	protein_coding
ENSG00000119203.14	2496.72	0.203341	0.340666	0.596892	0.55058	0.760245	CPSF3	protein_coding
ENSG00000134330.18	357.203	-0.146281	0.369366	-0.396031	0.692082	0.850947	IAH1	protein_coding
ENSG00000134308.14	11222.6	-0.43904	0.316522	-1.38708	0.165418	0.38912	YWHAQ	protein_coding
ENSG00000115750.17	1488.57	-0.245958	0.390469	-0.629905	0.528757	0.743492	TAF1B	protein_coding
ENSG00000134317.18	497.837	0.497419	0.327363	1.51947	0.128644	0.334191	GRHL1	protein_coding
ENSG00000172059.11	898.37	0.157783	0.310598	0.507997	0.611455	0.801259	KLF11	protein_coding
ENSG00000205795.4	8.77396	4.15014	2.21341	1.87499	0.0607935	NA	CYS1	protein_coding
ENSG00000115756.13	1000.26	-0.150839	0.4234	-0.356256	0.721649	0.869026	HPCAL1	protein_coding
ENSG00000115761.16	2317.64	-0.133588	0.349444	-0.382289	0.702247	0.857221	NOL10	protein_coding
ENSG00000143882.12	29.4417	0.414995	1.06352	0.390208	0.696383	0.853457	ATP6V1C2	protein_coding
ENSG00000143870.12	22396.3	-0.370233	0.285485	-1.29686	0.19468	0.426489	PDIA6	protein_coding
ENSG00000162975.5	18.256	-1.11094	1.11688	-0.994679	0.319892	0.569523	KCNF1	protein_coding
ENSG00000150873.11	36.691	-1.47507	1.27179	-1.15984	0.246114	0.4913	C2orf50	protein_coding
ENSG00000162976.13	90.2352	-0.463142	0.57173	-0.810072	0.417899	0.659807	PQLC3	protein_coding
ENSG00000134318.14	14993.2	0.463825	0.370386	1.25228	0.210469	0.447455	ROCK2	protein_coding
ENSG00000169016.17	1592.11	0.0231047	0.361476	0.0639178	0.949036	0.979945	E2F6	protein_coding
ENSG00000169006.7	0.977943	-0.912286	5.08414	-0.179438	0.857594	NA	NTSR2	protein_coding
ENSG00000134324.11	900.111	-0.419486	0.316655	-1.32474	0.185257	0.415058	LPIN1	protein_coding
ENSG00000071575.11	59.0394	0.747631	0.740181	1.01007	0.312464	0.561623	TRIB2	protein_coding
ENSG00000079785.15	5730.53	0.358737	0.386434	0.928326	0.353239	0.599267	DDX1	protein_coding
ENSG00000214842.5	14.8249	1.99248	1.39687	1.42639	0.153757	0.371339	RAD51AP2	protein_coding
ENSG00000163032.11	2559.93	0.335609	0.320368	1.04757	0.294835	0.543171	VSNL1	protein_coding
ENSG00000163029.16	3920.41	-0.465516	0.373975	-1.24478	0.213214	0.450705	SMC6	protein_coding
ENSG00000178295.15	2391.07	-0.254064	0.387607	-0.655466	0.512168	0.730913	GEN1	protein_coding
ENSG00000151379.3	0.614475	0.524027	6.06311	0.0864287	0.931126	NA	MSGN1	protein_coding
ENSG00000170745.12	6.13628	-3.82069	2.02694	-1.88496	0.0594352	NA	KCNS3	protein_coding
ENSG00000240857.2	455.737	-0.212969	0.474255	-0.449059	0.653389	0.826674	RDH14	protein_coding
ENSG00000185013.16	1.04111	4.60367	5.33269	0.863292	0.387977	NA	NT5C1B	protein_coding
ENSG00000143867.7	383.718	-0.341297	0.454167	-0.751478	0.452365	0.687934	OSR1	protein_coding
ENSG00000183891.6	643.961	-0.333059	0.321353	-1.03643	0.300002	0.549123	TTC32	protein_coding
ENSG00000068697.7	4477.31	0.226045	0.377162	0.599332	0.548952	0.758904	LAPTM4A	protein_coding
ENSG00000115884.11	8186.27	0.608495	0.38462	1.58207	0.113634	0.309915	SDC1	protein_coding
ENSG00000055917.15	9466.71	0.487852	0.30217	1.6145	0.10642	0.298061	PUM2	protein_coding
ENSG00000143878.9	12043.2	-0.268446	0.324135	-0.828193	0.407561	0.650468	RHOB	protein_coding
ENSG00000118960.13	2016.24	0.620565	0.370502	1.67493	0.0939475	0.27383	HS1BP3	protein_coding
ENSG00000143869.7	1275.89	-0.317505	0.339482	-0.935265	0.349652	0.595961	GDF7	protein_coding
ENSG00000118961.15	1409.5	0.373763	0.401883	0.930029	0.352356	0.598364	LDAH	protein_coding
ENSG00000084674.14	640962	0.451607	0.390587	1.15623	0.247588	0.492703	APOB	protein_coding
ENSG00000218819.4	153.269	-0.226928	0.507627	-0.447036	0.654849	0.827353	TDRD15	protein_coding
ENSG00000119771.15	23.9716	-0.522527	1.08637	-0.480984	0.630528	0.81308	KLHL29	protein_coding
ENSG00000173960.14	1523.19	0.364226	0.318259	1.14443	0.252444	0.498644	UBXN2A	protein_coding
ENSG00000205639.10	48.1373	0.816784	0.745775	1.09522	0.273422	0.520454	MFSD2B	protein_coding
ENSG00000163026.12	1113.72	-0.170816	0.346007	-0.493678	0.621534	0.807164	WDCP	protein_coding
ENSG00000119782.14	226.08	-0.385436	0.408497	-0.943546	0.345402	0.592316	FKBP1B	protein_coding
ENSG00000115128.7	1834.62	-0.105874	0.320727	-0.330108	0.741319	0.879385	SF3B6	protein_coding
ENSG00000219626.9	30.7606	0.517156	0.803935	0.643281	0.520042	0.736406	FAM228B	protein_coding
ENSG00000176732.6	11.964	1.52661	1.31247	1.16316	0.244765	0.489829	PFN4	protein_coding
ENSG00000276087.2	0.973436	2.76651	5.21145	0.530853	0.595521	NA	AC008073.3	protein_coding
ENSG00000186453.13	1.47745	-0.606815	4.02458	-0.150777	0.880152	NA	FAM228A	protein_coding
ENSG00000115137.11	240.448	0.638104	0.443678	1.43822	0.150373	0.365819	DNAJC27	protein_coding
ENSG00000084710.14	240.661	-0.346319	0.489132	-0.708027	0.478929	0.707142	EFR3B	protein_coding
ENSG00000115138.11	0.531359	-3.5822	6.95028	-0.515404	0.606271	NA	POMC	protein_coding
ENSG00000119772.16	2875.5	-0.137527	0.318697	-0.431529	0.666084	0.834919	DNMT3A	protein_coding
ENSG00000138101.18	689.565	0.115527	0.329657	0.350445	0.726005	0.87171	DTNB	protein_coding
ENSG00000143970.16	5573.97	0.10845	0.276597	0.392085	0.694995	0.85282	ASXL2	protein_coding
ENSG00000084733.11	4499.47	-0.0539686	0.286952	-0.188075	0.850818	0.93351	RAB10	protein_coding
ENSG00000157833.13	278.034	0.870094	0.468215	1.85832	0.0631235	0.21172	GAREM2	protein_coding
ENSG00000084754.12	10043.5	-0.324968	0.285656	-1.13762	0.255279	0.502071	HADHA	protein_coding
ENSG00000138029.14	4473.62	0.102357	0.291238	0.351454	0.725247	0.87119	HADHB	protein_coding
ENSG00000173567.15	70.9092	-0.511079	0.591203	-0.864472	0.387329	0.631525	ADGRF3	protein_coding
ENSG00000138018.18	7884.43	-0.419074	0.3272	-1.28079	0.200268	0.43413	SELENOI	protein_coding
ENSG00000157856.12	10.3592	-0.654379	1.46191	-0.44762	0.654427	0.827242	DRC1	protein_coding
ENSG00000173557.15	0.644397	-0.5147	6.53594	-0.0787492	0.937232	NA	C2orf70	protein_coding
ENSG00000157884.11	1.3487	-1.4444	4.00071	-0.361036	0.718072	NA	CIB4	protein_coding
ENSG00000171303.7	5.66734	-1.0209	2.68659	-0.379997	0.703948	NA	KCNK3	protein_coding
ENSG00000213699.9	2239.85	-0.6319	0.351337	-1.79856	0.0720883	0.231404	SLC35F6	protein_coding
ENSG00000115163.15	896.095	-0.562523	0.30792	-1.82685	0.0677223	0.222125	CENPA	protein_coding
ENSG00000157851.17	50.7975	-0.198642	0.714941	-0.277844	0.781132	0.899682	DPYSL5	protein_coding
ENSG00000119777.20	4432.34	-0.413505	0.354227	-1.16735	0.243071	0.48803	TMEM214	protein_coding
ENSG00000084693.16	3210.33	0.054723	0.360921	0.15162	0.879486	0.947584	AGBL5	protein_coding
ENSG00000228474.6	4685.48	0.165618	0.338152	0.489774	0.624294	0.809131	OST4	protein_coding
ENSG00000138080.13	1529.04	-0.30492	0.350903	-0.868959	0.384869	0.628919	EMILIN1	protein_coding
ENSG00000143994.14	16.7414	0.950011	1.25256	0.758455	0.448179	0.684057	ABHD1	protein_coding
ENSG00000186143.11	0.531359	-3.5822	6.95028	-0.515404	0.606271	NA	PRR30	protein_coding
ENSG00000138085.16	2985.18	-0.480303	0.313705	-1.53107	0.125753	0.329595	ATRAID	protein_coding
ENSG00000163793.12	8.2341	0.695786	1.83222	0.379751	0.704131	NA	DNAJC5G	protein_coding
ENSG00000138100.13	17.7312	-2.11795	1.20751	-1.75398	0.079434	0.247069	TRIM54	protein_coding
ENSG00000163794.6	24.5855	0.0813769	1.04479	0.0778886	0.937917	0.974843	UCN	protein_coding
ENSG00000115204.15	855.972	-0.201625	0.304112	-0.662995	0.507334	0.727979	MPV17	protein_coding
ENSG00000115207.13	3485.2	-0.311764	0.301368	-1.03449	0.300905	0.550058	GTF3C2	protein_coding
ENSG00000115234.11	2688.36	-0.570758	0.352973	-1.617	0.105878	0.297137	SNX17	protein_coding
ENSG00000163795.14	96.954	-0.362827	0.624098	-0.581362	0.560997	0.766706	ZNF513	protein_coding
ENSG00000115216.14	4430.65	-0.546151	0.325109	-1.6799	0.0929764	0.271953	NRBP1	protein_coding
ENSG00000157992.12	31.011	0.382809	0.887175	0.431492	0.666111	0.834919	KRTCAP3	protein_coding
ENSG00000115226.10	217.132	-0.820669	0.468575	-1.75141	0.0798745	0.248047	FNDC4	protein_coding
ENSG00000221843.4	72.9037	0.252713	0.741781	0.340684	0.733341	0.875481	C2orf16	protein_coding
ENSG00000243943.10	1178.2	0.0770566	0.374312	0.205862	0.836899	0.926314	ZNF512	protein_coding
ENSG00000176714.9	105.323	0.295225	0.592741	0.498068	0.618436	0.804992	CCDC121	protein_coding
ENSG00000198522.13	856.649	-0.00177808	0.476684	-0.0037301	0.997024	0.998462	GPN1	protein_coding
ENSG00000119760.16	2551.17	0.411674	0.286961	1.4346	0.151402	0.367269	SUPT7L	protein_coding
ENSG00000163798.13	1675.23	0.485323	0.320799	1.51286	0.130316	0.336709	SLC4A1AP	protein_coding
ENSG00000163803.13	160.102	0.280082	0.525217	0.53327	0.593847	0.788717	PLB1	protein_coding
ENSG00000213639.10	8382.75	0.0581124	0.302571	0.192062	0.847693	0.932325	PPP1CB	protein_coding
ENSG00000171103.11	921.149	0.307001	0.305778	1.004	0.315378	0.564521	TRMT61B	protein_coding
ENSG00000163811.12	7724.86	0.540175	0.316884	1.70465	0.0882601	0.263426	WDR43	protein_coding
ENSG00000189350.12	9.98558	1.74598	1.7168	1.017	0.309154	0.557731	TOGARAM2	protein_coding
ENSG00000179270.7	3.24744	1.06012	3.15585	0.335921	0.736931	NA	PCARE	protein_coding
ENSG00000115295.20	28.3015	1.48685	1.02754	1.44699	0.147899	0.362247	CLIP4	protein_coding
ENSG00000171094.18	11.225	1.09989	1.76261	0.624011	0.53262	0.745775	ALK	protein_coding
ENSG00000213626.13	41.4704	1.02837	1.01486	1.01331	0.310913	0.559974	LBH	protein_coding
ENSG00000172954.13	2757.65	-0.25665	0.334856	-0.766449	0.443409	0.680303	LCLAT1	protein_coding
ENSG00000162949.16	3.94118	1.24095	2.74608	0.451897	0.651343	NA	CAPN13	protein_coding
ENSG00000158089.15	5.08256	-2.76135	2.41452	-1.14364	0.252772	NA	GALNT14	protein_coding
ENSG00000214711.10	3.03371	-1.21068	2.87042	-0.421776	0.673189	NA	CAPN14	protein_coding
ENSG00000013016.16	79.3383	0.860365	0.605868	1.42006	0.155592	0.374434	EHD3	protein_coding
ENSG00000158125.10	13.771	0.577366	1.72735	0.33425	0.738191	0.877644	XDH	protein_coding
ENSG00000277893.2	7.44804	1.43749	1.87169	0.768019	0.442476	NA	SRD5A2	protein_coding
ENSG00000162959.13	422.708	0.133989	0.421624	0.317792	0.750643	0.883759	MEMO1	protein_coding
ENSG00000162961.14	855.62	-0.140157	0.324496	-0.431924	0.665797	0.834881	DPY30	protein_coding
ENSG00000021574.12	1901.07	0.304913	0.418342	0.72886	0.466087	0.697388	SPAST	protein_coding
ENSG00000152683.14	2096.53	0.0871108	0.386541	0.22536	0.821699	0.91864	SLC30A6	protein_coding
ENSG00000091106.19	8.80281	3.33813	2.14134	1.5589	0.11902	NA	NLRC4	protein_coding
ENSG00000119820.11	3210.84	0.605726	0.32005	1.8926	0.0584112	0.200579	YIPF4	protein_coding
ENSG00000018699.13	1504.46	-0.21627	0.32172	-0.672231	0.501436	0.723465	TTC27	protein_coding
ENSG00000049323.16	56.7911	0.323688	0.662073	0.4889	0.624912	0.809719	LTBP1	protein_coding
ENSG00000152689.18	12.5264	0.914654	1.46882	0.622715	0.533472	0.746282	RASGRP3	protein_coding
ENSG00000119812.19	1561.5	0.321241	0.359811	0.892805	0.371961	0.617536	FAM98A	protein_coding
ENSG00000171055.15	1915.3	0.252372	0.311595	0.809938	0.417976	0.659827	FEZ2	protein_coding
ENSG00000205221.12	6.05274	-3.3641	2.65257	-1.26824	0.204713	NA	VIT	protein_coding
ENSG00000115808.12	2309.45	0.230784	0.378436	0.609836	0.541971	0.753656	STRN	protein_coding
ENSG00000008869.12	1524.62	0.489426	0.354875	1.37915	0.167848	0.392625	HEATR5B	protein_coding
ENSG00000152133.14	558.534	0.60277	0.372123	1.61981	0.105272	0.295986	GPATCH11	protein_coding
ENSG00000055332.18	3013.63	0.687971	0.353842	1.94429	0.0518606	0.185141	EIF2AK2	protein_coding
ENSG00000138068.10	2.90939	-2.6449	2.87967	-0.918475	0.35837	NA	SULT6B1	protein_coding
ENSG00000115816.15	3777.94	-0.178462	0.374096	-0.477048	0.633328	0.814749	CEBPZ	protein_coding
ENSG00000003509.16	1161.7	-0.0536116	0.309032	-0.173482	0.862272	0.938376	NDUFAF7	protein_coding
ENSG00000115825.10	2647.33	-0.289916	0.394275	-0.735314	0.462148	0.694617	PRKD3	protein_coding
ENSG00000115828.17	57.6728	0.325412	0.78671	0.413637	0.67914	0.842693	QPCT	protein_coding
ENSG00000163171.7	51.6553	1.92399	1.00724	1.91016	0.0561122	0.195109	CDC42EP3	protein_coding
ENSG00000138061.12	7.36569	-0.788877	1.89221	-0.416907	0.676746	NA	CYP1B1	protein_coding
ENSG00000119787.14	3879.71	0.500514	0.366939	1.36403	0.17256	0.397985	ATL2	protein_coding
ENSG00000143889.16	3447.25	-0.173322	0.302345	-0.573257	0.566471	0.769855	HNRNPLL	protein_coding
ENSG00000143891.17	1862.49	-0.301357	0.336316	-0.896055	0.370223	0.615899	GALM	protein_coding
ENSG00000152147.11	488.446	0.0305727	0.438391	0.0697385	0.944402	0.978269	GEMIN6	protein_coding
ENSG00000163214.21	1283.1	-0.0684254	0.416927	-0.164118	0.869638	0.942632	DHX57	protein_coding
ENSG00000214694.11	18.2731	0.424197	1.3317	0.318538	0.750077	0.883433	ARHGEF33	protein_coding
ENSG00000152154.11	42.2063	-0.404228	0.843331	-0.479323	0.631709	0.813854	TMEM178A	protein_coding
ENSG00000138050.15	797.053	0.442499	0.360012	1.22912	0.219025	0.457719	THUMPD2	protein_coding
ENSG00000183023.18	23.3156	-0.33853	1.63198	-0.207435	0.83567	0.926051	SLC8A1	protein_coding
ENSG00000205086.7	3.70163	2.53929	2.87524	0.883159	0.37715	NA	C2orf91	protein_coding
ENSG00000143924.19	28329.1	0.0760834	0.373289	0.203819	0.838495	0.927036	EML4	protein_coding
ENSG00000115944.15	3567.45	0.256871	0.292245	0.878961	0.379423	0.624277	COX7A2L	protein_coding
ENSG00000171126.8	675.22	0.620231	0.373427	1.66092	0.0967304	0.27945	KCNG3	protein_coding
ENSG00000162882.15	783.695	-0.38116	0.449754	-0.847485	0.396725	0.640265	HAAO	protein_coding
ENSG00000152518.8	4482.65	-0.0109932	0.280992	-0.039123	0.968792	0.987443	ZFP36L2	protein_coding
ENSG00000115970.18	2277.69	-0.148505	0.29898	-0.496706	0.619396	0.805654	THADA	protein_coding
ENSG00000223658.8	39.9234	-0.811352	0.768162	-1.05622	0.290866	0.539234	C1GALT1C1L	protein_coding
ENSG00000138036.18	264.901	-0.755911	0.404206	-1.87011	0.0614682	0.208022	DYNC2LI1	protein_coding
ENSG00000138075.12	840.764	0.606638	0.317281	1.91199	0.0558774	0.194703	ABCG5	protein_coding
ENSG00000143921.8	759.058	-0.721145	0.38255	-1.8851	0.0594162	0.203037	ABCG8	protein_coding
ENSG00000138095.19	24337.4	0.655775	0.391135	1.6766	0.0936214	0.273205	LRPPRC	protein_coding
ENSG00000138032.21	797.87	0.279095	0.333175	0.837683	0.402209	0.645605	PPM1B	protein_coding
ENSG00000138079.13	2.16268	-4.37839	3.04644	-1.43721	0.150657	NA	SLC3A1	protein_coding
ENSG00000143919.15	568.804	0.564712	0.336228	1.67955	0.0930445	0.272083	CAMKMT	protein_coding
ENSG00000138083.5	0.964713	3.50242	4.18813	0.836272	0.403002	NA	SIX3	protein_coding
ENSG00000170577.8	0.135194	1.62948	7.05747	0.230888	0.817402	NA	SIX2	protein_coding
ENSG00000068784.13	1371.72	0.296998	0.340043	0.873414	0.382438	0.62677	SRBD1	protein_coding
ENSG00000171132.14	174.718	-0.157501	0.414388	-0.38008	0.703886	0.857955	PRKCE	protein_coding
ENSG00000284701.1	0.351837	1.14753	6.9879	0.164217	0.869561	NA	TMEM247	protein_coding
ENSG00000250565.7	106.238	-0.907717	0.496572	-1.82797	0.0675545	0.221894	ATP6V1E2	protein_coding
ENSG00000119878.5	969.193	0.332499	0.377719	0.880282	0.378707	0.623575	CRIPT	protein_coding
ENSG00000171150.9	1785.34	0.244179	0.32321	0.755482	0.44996	0.686191	SOCS5	protein_coding
ENSG00000180398.12	11035.4	0.167762	0.318968	0.525951	0.598922	0.792511	MCFD2	protein_coding
ENSG00000068724.16	2393.28	-0.229014	0.381711	-0.599966	0.548529	0.758586	TTC7A	protein_coding
ENSG00000239605.11	11.7378	0.444911	1.31568	0.338161	0.735242	0.876472	STPG4	protein_coding
ENSG00000273269.3	0.345888	1.6084	7.04424	0.228329	0.819391	NA	AC073283.3	protein_coding
ENSG00000143933.17	15719.7	-0.0450551	0.327205	-0.137697	0.89048	0.953905	CALM2	protein_coding
ENSG00000184261.4	2.15052	-0.0140242	3.05689	-0.00458774	0.99634	NA	KCNK12	protein_coding
ENSG00000138081.20	2544.37	0.33103	0.368384	0.898602	0.368864	0.614627	FBXO11	protein_coding
ENSG00000170802.16	4437.64	0.560994	0.358221	1.56606	0.117336	0.316083	FOXN2	protein_coding
ENSG00000162869.16	996.034	0.490403	0.339108	1.44615	0.148134	0.362431	PPP1R21	protein_coding
ENSG00000243244.6	33.7472	-1.02622	0.799181	-1.28409	0.199111	0.432912	STON1	protein_coding
ENSG00000068781.21	0.552006	-0.0924902	5.88132	-0.0157261	0.987453	NA	STON1-GTF2A1L	protein_coding
ENSG00000242441.8	0.203345	-2.20785	7.00069	-0.315376	0.752476	NA	GTF2A1L	protein_coding
ENSG00000279956.1	0.249339	-2.47519	6.98685	-0.354265	0.72314	NA	AC073082.1	protein_coding
ENSG00000138039.15	2.53158	-0.214001	3.45246	-0.061985	0.950575	NA	LHCGR	protein_coding
ENSG00000170820.11	1.51514	-0.9009	4.42925	-0.203398	0.838824	NA	FSHR	protein_coding
ENSG00000179915.23	24.9701	1.4338	1.99219	0.719714	0.471701	0.701587	NRXN1	protein_coding
ENSG00000115239.21	290.718	0.225527	0.366703	0.615011	0.538547	0.750489	ASB3	protein_coding
ENSG00000270898.5	9.67075	-0.180233	1.47959	-0.121813	0.903047	0.958948	GPR75-ASB3	protein_coding
ENSG00000068912.14	3737.97	0.596029	0.329691	1.80784	0.0706313	0.227993	ERLEC1	protein_coding
ENSG00000178021.11	11.0026	2.43717	2.18918	1.11328	0.265587	0.512592	TSPYL6	protein_coding
ENSG00000177994.16	2.95019	-0.25765	3.16727	-0.0813476	0.935166	NA	C2orf73	protein_coding
ENSG00000115306.16	77511	-0.0726799	0.31261	-0.232494	0.816154	0.916318	SPTBN1	protein_coding
ENSG00000214595.11	1279.77	0.198718	0.308451	0.644247	0.519416	0.736061	EML6	protein_coding
ENSG00000115310.18	6431.64	-0.0748211	0.307488	-0.24333	0.807749	0.912374	RTN4	protein_coding
ENSG00000162994.16	441.124	0.269339	0.377428	0.713618	0.475463	0.704887	CLHC1	protein_coding
ENSG00000143947.13	18302.2	0.288768	0.474754	0.608249	0.543022	0.754463	RPS27A	protein_coding
ENSG00000085760.14	2280.86	0.204244	0.373029	0.547528	0.584016	0.781635	MTIF2	protein_coding
ENSG00000115355.16	5644.69	-0.0115406	0.399249	-0.0289057	0.97694	0.990207	CCDC88A	protein_coding
ENSG00000163001.11	426.042	-0.465236	0.418626	-1.11134	0.266422	0.513533	CFAP36	protein_coding
ENSG00000275052.5	5557.43	0.352903	0.336542	1.04862	0.294355	0.542731	PPP4R3B	protein_coding
ENSG00000138035.15	2421.98	-0.379465	0.352616	-1.07614	0.281864	0.529629	PNPT1	protein_coding
ENSG00000115380.20	4.24678	-2.31366	2.5229	-0.917064	0.359109	NA	EFEMP1	protein_coding
ENSG00000055813.6	0.78981	-2.37084	5.14402	-0.460892	0.644876	NA	CCDC85A	protein_coding
ENSG00000028116.17	1014.36	-0.192379	0.331266	-0.580739	0.561417	0.766818	VRK2	protein_coding
ENSG00000115392.11	1279.54	-0.586463	0.388102	-1.51111	0.130761	0.337403	FANCL	protein_coding
ENSG00000119866.21	8.25027	-0.184831	2.11558	-0.0873663	0.93038	NA	BCL11A	protein_coding
ENSG00000162924.14	661.824	-0.429379	0.402692	-1.06627	0.286301	0.534505	REL	protein_coding
ENSG00000162927.14	1469.72	0.0269001	0.373754	0.0719728	0.942624	0.977303	PUS10	protein_coding
ENSG00000162928.9	2210.97	-0.0719217	0.297343	-0.241881	0.808873	0.913096	PEX13	protein_coding
ENSG00000162929.13	982.245	0.0168976	0.347686	0.0486002	0.961238	0.984649	KIAA1841	protein_coding
ENSG00000237651.6	47.812	0.405696	0.722383	0.561607	0.574384	0.775451	C2orf74	protein_coding
ENSG00000115464.14	11323.1	0.562861	0.39469	1.42608	0.153844	0.371443	USP34	protein_coding
ENSG00000082898.16	13395.3	-0.0589882	0.305034	-0.193382	0.846659	0.931905	XPO1	protein_coding
ENSG00000115484.15	10422.3	0.272736	0.318551	0.856179	0.391899	0.636064	CCT4	protein_coding
ENSG00000170340.11	1716.14	-0.292217	0.301798	-0.968252	0.332918	0.581261	B3GNT2	protein_coding
ENSG00000186889.10	3.3106	-2.68702	2.84279	-0.945206	0.344554	NA	TMEM17	protein_coding
ENSG00000143951.16	303.216	0.0568873	0.42039	0.13532	0.892359	0.954705	WDPCP	protein_coding
ENSG00000014641.18	4554.63	0.452873	0.359264	1.26056	0.207468	0.443427	MDH1	protein_coding
ENSG00000169764.15	3535.23	-0.0972474	0.346413	-0.280727	0.77892	0.898729	UGP2	protein_coding
ENSG00000143952.20	5083.86	0.359745	0.395336	0.909972	0.362837	0.608925	VPS54	protein_coding
ENSG00000197329.12	1664.14	-0.223224	0.332065	-0.672228	0.501438	0.723465	PELI1	protein_coding
ENSG00000119862.13	834.529	0.0981606	0.345683	0.283961	0.77644	0.89753	LGALSL	protein_coding
ENSG00000119844.15	1882.58	0.588522	0.356262	1.65193	0.0985478	0.282457	AFTPH	protein_coding
ENSG00000115902.11	3641.82	-0.0869247	0.289625	-0.300128	0.764079	0.891348	SLC1A4	protein_coding
ENSG00000138071.13	14262.4	-0.0246966	0.317511	-0.0777819	0.938002	0.974843	ACTR2	protein_coding
ENSG00000198369.10	4501.67	0.0699297	0.28712	0.243556	0.807575	0.912344	SPRED2	protein_coding
ENSG00000143995.20	348.422	-0.0828681	0.35628	-0.232593	0.816078	0.916318	MEIS1	protein_coding
ENSG00000143971.8	1196.43	0.480532	0.353545	1.35918	0.174089	0.399667	ETAA1	protein_coding
ENSG00000197223.11	838.078	0.217307	0.410327	0.529595	0.596393	0.790816	C1D	protein_coding
ENSG00000243667.7	207.117	-0.213052	0.40167	-0.530415	0.595825	0.790382	WDR92	protein_coding
ENSG00000273398.6	4.36221	-2.49411	2.17073	-1.14898	0.250566	NA	AC017083.3	protein_coding
ENSG00000115946.8	1663.03	-0.525528	0.331186	-1.58681	0.112556	0.308216	PNO1	protein_coding
ENSG00000221823.11	2630.4	-0.0429884	0.313774	-0.137005	0.891027	0.954193	PPP3R1	protein_coding
ENSG00000119865.8	7.82833	0.46376	2.3478	0.19753	0.843413	NA	CNRIP1	protein_coding
ENSG00000115956.10	10.2493	0.674267	2.40606	0.280237	0.779296	0.898843	PLEK	protein_coding
ENSG00000204923.4	114.534	-0.293727	0.521652	-0.56307	0.573387	0.774746	FBXO48	protein_coding
ENSG00000169621.10	243.332	0.843566	0.443697	1.90122	0.0572734	0.197744	APLF	protein_coding
ENSG00000169618.6	0.735545	-2.23445	5.70843	-0.39143	0.69548	NA	PROKR1	protein_coding
ENSG00000163219.11	7.23162	3.41631	2.1961	1.55563	0.119797	NA	ARHGAP25	protein_coding
ENSG00000163217.2	3.27668	1.62869	2.98655	0.54534	0.58552	NA	BMP10	protein_coding
ENSG00000183607.10	2.78924	-0.583225	3.26925	-0.178398	0.858411	NA	GKN2	protein_coding
ENSG00000169605.5	0.923091	0.81507	4.79245	0.170074	0.864952	NA	GKN1	protein_coding
ENSG00000169604.19	3403.45	0.159084	0.335063	0.47479	0.634937	0.815873	ANTXR1	protein_coding
ENSG00000198380.12	11006.9	0.162187	0.322845	0.502366	0.61541	0.803306	GFPT1	protein_coding
ENSG00000169599.12	796.434	0.431696	0.323005	1.3365	0.181386	0.409797	NFU1	protein_coding
ENSG00000115977.19	3301.62	0.413486	0.289818	1.42671	0.153664	0.371257	AAK1	protein_coding
ENSG00000196975.16	6327.26	-0.295448	0.279317	-1.05775	0.290168	0.538296	ANXA4	protein_coding
ENSG00000087338.5	1697.58	-0.131652	0.319742	-0.411745	0.680526	0.843208	GMCL1	protein_coding
ENSG00000124380.11	2046.73	0.0909217	0.297642	0.305473	0.760006	0.889473	SNRNP27	protein_coding
ENSG00000059728.11	954.775	0.485787	0.336931	1.4418	0.149359	0.36439	MXD1	protein_coding
ENSG00000244617.2	35.9731	-0.789016	0.768424	-1.0268	0.304516	0.553011	ASPRV1	protein_coding
ENSG00000169564.6	10421.1	0.0226129	0.327576	0.0690311	0.944965	0.978543	PCBP1	protein_coding
ENSG00000115998.7	441.638	0.251588	0.356347	0.70602	0.480176	0.707919	C2orf42	protein_coding
ENSG00000116001.16	4817.34	0.34776	0.348713	0.997266	0.318635	0.568315	TIA1	protein_coding
ENSG00000116005.12	8586.59	0.297014	0.322912	0.919799	0.357678	0.603741	PCYOX1	protein_coding
ENSG00000143977.14	2495.15	-0.570482	0.426988	-1.33606	0.181529	0.409927	SNRPG	protein_coding
ENSG00000075340.23	15.44	2.09673	1.88695	1.11117	0.266494	0.513536	ADD2	protein_coding
ENSG00000183733.6	0.372061	1.25056	6.98277	0.179093	0.857865	NA	FIGLA	protein_coding
ENSG00000152672.8	8.68957	1.40283	2.04006	0.687643	0.491678	NA	CLEC4F	protein_coding
ENSG00000116031.9	10.9796	0.101057	2.07179	0.0487777	0.961096	0.984555	CD207	protein_coding
ENSG00000116039.13	4.34006	-1.21452	1.96519	-0.618018	0.536563	NA	ATP6V1B1	protein_coding
ENSG00000258881.6	8.60155	-1.9205	1.48689	-1.29163	0.196487	NA	AC007040.2	protein_coding
ENSG00000144031.12	10.0037	-0.213042	1.53167	-0.139091	0.889378	0.953193	ANKRD53	protein_coding
ENSG00000144043.12	2650.41	-0.182535	0.297061	-0.614471	0.538904	0.750827	TEX261	protein_coding
ENSG00000124357.13	1078.85	0.255718	0.31704	0.806579	0.419909	0.661457	NAGK	protein_coding
ENSG00000124370.11	1219.5	-0.00989366	0.323804	-0.0305544	0.975625	0.989866	MCEE	protein_coding
ENSG00000124383.9	4222.8	0.00376621	0.350339	0.0107502	0.991423	0.996423	MPHOSPH10	protein_coding
ENSG00000124374.9	50.0165	-0.299534	0.780416	-0.383814	0.701117	0.856586	PAIP2B	protein_coding
ENSG00000075292.19	7021.69	0.713323	0.370299	1.92634	0.0540614	0.1903	ZNF638	protein_coding
ENSG00000135636.14	53.0542	-0.00714282	0.714325	-0.0099994	0.992022	0.996486	DYSF	protein_coding
ENSG00000116096.6	581.637	-0.580189	0.355084	-1.63395	0.10227	0.290077	SPR	protein_coding
ENSG00000135638.13	147.896	0.14599	0.497447	0.293479	0.769156	0.893792	EMX1	protein_coding
ENSG00000135631.16	1363.86	-0.149992	0.431785	-0.347376	0.728309	0.872497	RAB11FIP5	protein_coding
ENSG00000214513.3	1.9548	-0.0229209	3.73206	-0.00614163	0.9951	NA	NOTO	protein_coding
ENSG00000135624.16	13575.2	-0.344541	0.330287	-1.04315	0.296877	0.545691	CCT7	protein_coding
ENSG00000116127.18	2933.72	-0.605662	0.385768	-1.57002	0.116411	0.314432	ALMS1	protein_coding
ENSG00000144034.14	757.11	-0.284436	0.346942	-0.819838	0.412309	0.655012	TPRKB	protein_coding
ENSG00000187833.7	6.17928	1.21111	2.60908	0.46419	0.642511	NA	C2orf78	protein_coding
ENSG00000124356.16	2268.65	-0.113836	0.289814	-0.392791	0.694474	0.852581	STAMBP	protein_coding
ENSG00000163017.13	1.96322	-0.932502	3.37447	-0.27634	0.782287	NA	ACTG2	protein_coding
ENSG00000114956.20	1545.14	-0.0226956	0.305442	-0.0743041	0.940768	0.976514	DGUOK	protein_coding
ENSG00000114978.18	7729.21	0.278772	0.316287	0.881388	0.378108	0.6231	MOB1A	protein_coding
ENSG00000264324.1	8.56137	0.572353	1.47399	0.388302	0.697793	NA	AC006030.1	protein_coding
ENSG00000188687.17	8.31297	1.51067	1.51529	0.996951	0.318788	NA	SLC4A5	protein_coding
ENSG00000204843.12	6136.46	-0.492223	0.385896	-1.27553	0.202121	0.43659	DCTN1	protein_coding
ENSG00000159239.13	1.13336	-0.39375	4.43453	-0.088792	0.929247	NA	AC005041.1	protein_coding
ENSG00000284308.1	4.4718	-1.85558	2.2912	-0.809873	0.418013	NA	C2orf81	protein_coding
ENSG00000005448.16	120.046	-0.647437	0.503998	-1.2846	0.198931	0.432714	WDR54	protein_coding
ENSG00000115274.15	24.1771	-1.00339	0.897213	-1.11834	0.263423	0.510222	INO80B	protein_coding
ENSG00000274049.4	0.133046	-1.35173	7.06582	-0.191306	0.848286	NA	INO80B-WBP1	protein_coding
ENSG00000239779.7	159.446	0.514088	0.509465	1.00908	0.312939	0.561979	WBP1	protein_coding
ENSG00000115275.12	3353.55	-0.412016	0.394013	-1.04569	0.295703	0.544195	MOGS	protein_coding
ENSG00000204822.7	0.48303	-1.68414	6.9559	-0.242116	0.80869	NA	MRPL53	protein_coding
ENSG00000135637.13	701.542	-0.443151	0.390604	-1.13453	0.256573	0.502893	CCDC142	protein_coding
ENSG00000115282.19	1467.15	-0.651951	0.336634	-1.93668	0.0527847	0.18752	TTC31	protein_coding
ENSG00000179528.16	253.858	-0.442686	0.45854	-0.965425	0.334332	0.582383	LBX2	protein_coding
ENSG00000115289.14	369.355	0.671669	0.409038	1.64207	0.100575	0.286512	PCGF1	protein_coding
ENSG00000115307.17	5838.59	-0.585386	0.354899	-1.64945	0.0990565	0.283274	AUP1	protein_coding
ENSG00000115317.11	988.51	-0.566208	0.376261	-1.50483	0.132368	0.339778	HTRA2	protein_coding
ENSG00000159374.17	6.23092	-1.91986	2.3869	-0.804335	0.421204	NA	M1AP	protein_coding
ENSG00000135622.13	618.205	-0.366544	0.345422	-1.06115	0.288623	0.536951	SEMA4F	protein_coding
ENSG00000115353.11	16.0628	1.6674	2.07153	0.804915	0.420869	0.662142	TACR1	protein_coding
ENSG00000115363.14	1984.5	0.121172	0.322593	0.375618	0.707201	0.859731	EVA1A	protein_coding
ENSG00000115364.14	3967.99	-0.13944	0.361931	-0.385266	0.70004	0.856065	MRPL19	protein_coding
ENSG00000005436.13	1354.3	0.146317	0.373033	0.392234	0.694885	0.852792	GCFC2	protein_coding
ENSG00000143954.13	0.961887	-2.70525	5.1367	-0.526651	0.598436	NA	REG3G	protein_coding
ENSG00000172023.7	0.331614	1.0381	6.99377	0.148432	0.882002	NA	REG1B	protein_coding
ENSG00000115386.6	0.604776	1.9529	6.12344	0.318922	0.749785	NA	REG1A	protein_coding
ENSG00000172016.15	0.203345	-2.20785	7.00069	-0.315376	0.752476	NA	REG3A	protein_coding
ENSG00000066032.18	11.6088	-1.0312	1.59404	-0.646909	0.517691	0.73477	CTNNA2	protein_coding
ENSG00000162951.11	0.554356	-3.64077	6.82112	-0.53375	0.593515	NA	LRRTM1	protein_coding
ENSG00000163541.12	1909.78	0.492199	0.30182	1.63077	0.102939	0.291429	SUCLG1	protein_coding
ENSG00000115423.18	31.3778	0.26646	1.15142	0.231418	0.81699	0.916884	DNAH6	protein_coding
ENSG00000176407.18	1984.52	-0.14026	0.299975	-0.467574	0.640089	0.818744	KCMF1	protein_coding
ENSG00000152284.5	76.2294	0.167734	0.559142	0.299984	0.764189	0.891348	TCF7L1	protein_coding
ENSG00000152291.14	13877	-0.231253	0.272409	-0.848917	0.395927	0.639487	TGOLN2	protein_coding
ENSG00000115459.18	546.487	0.080107	0.373181	0.21466	0.830032	0.922857	ELMOD3	protein_coding
ENSG00000042493.16	173.894	0.418732	0.604737	0.69242	0.488673	0.714359	CAPG	protein_coding
ENSG00000152292.17	9.92383	1.46111	1.85637	0.787078	0.431236	0.670396	SH2D6	protein_coding
ENSG00000168906.13	8633.49	-0.614639	0.364517	-1.68617	0.0917627	0.269861	MAT2A	protein_coding
ENSG00000115486.12	4113.93	-0.383147	0.296678	-1.29146	0.196545	0.429616	GGCX	protein_coding
ENSG00000168899.5	222.054	0.69889	0.528102	1.3234	0.185703	0.415583	VAMP5	protein_coding
ENSG00000168894.9	1620.59	-0.331558	0.399501	-0.82993	0.406579	0.649745	RNF181	protein_coding
ENSG00000168883.20	2787.12	-0.45702	0.291091	-1.57002	0.116409	0.314432	USP39	protein_coding
ENSG00000168887.11	1607.75	-0.165661	0.307285	-0.539114	0.589808	0.786171	C2orf68	protein_coding
ENSG00000168878.16	9.51304	0.111626	1.39705	0.0799016	0.936316	0.9742	SFTPB	protein_coding
ENSG00000115523.16	1.60947	0.757033	3.73846	0.202499	0.839527	NA	GNLY	protein_coding
ENSG00000168874.13	361.725	0.723757	0.434099	1.66726	0.0954622	0.276886	ATOH8	protein_coding
ENSG00000115525.18	46.1278	0.974762	0.676862	1.44012	0.149833	0.365066	ST3GAL5	protein_coding
ENSG00000068654.16	8585.82	0.167708	0.336019	0.499103	0.617707	0.804495	POLR1A	protein_coding
ENSG00000132300.19	6199.36	-0.0918349	0.338999	-0.2709	0.786468	0.902531	PTCD3	protein_coding
ENSG00000132305.20	4701.38	0.311236	0.328858	0.946416	0.343936	0.591184	IMMT	protein_coding
ENSG00000132313.15	1446.56	-0.236536	0.352973	-0.670126	0.502778	0.724386	MRPL35	protein_coding
ENSG00000068615.18	14.3252	0.278857	1.24256	0.224421	0.82243	0.91896	REEP1	protein_coding
ENSG00000115548.17	4142.44	0.518778	0.328272	1.58033	0.114032	0.310568	KDM3A	protein_coding
ENSG00000249884.8	9.90433	-0.437211	1.33785	-0.326801	0.743819	0.880551	RNF103-CHMP3	protein_coding
ENSG00000239305.7	1233.87	0.454176	0.377079	1.20446	0.228412	0.470379	RNF103	protein_coding
ENSG00000153561.13	5942.68	-0.2041	0.304561	-0.670146	0.502765	0.724386	RMND5A	protein_coding
ENSG00000172116.22	21.6548	-1.68266	0.951891	-1.76771	0.0771101	0.242528	CD8B	protein_coding
ENSG00000183281.14	10.6053	2.03862	1.36281	1.49589	0.134682	0.34365	PLGLB1	protein_coding
ENSG00000125551.18	3.05526	-0.6961	3.05861	-0.227587	0.819967	NA	PLGLB2	protein_coding
ENSG00000185304.15	9.44594	0.718315	1.49321	0.481053	0.630479	0.81308	RGPD2	protein_coding
ENSG00000172086.8	128.168	0.870713	0.501706	1.7355	0.0826515	0.253445	KRCC1	protein_coding
ENSG00000115593.15	7.73536	0.812189	2.48884	0.326333	0.744173	NA	SMYD1	protein_coding
ENSG00000144115.16	3.57974	0.169094	2.93284	0.0576554	0.954023	NA	THNSL2	protein_coding
ENSG00000214336.4	2.88286	0.585755	3.19169	0.183525	0.854386	NA	FOXI3	protein_coding
ENSG00000259916.1	3.51504	-0.773416	2.4155	-0.320189	0.748825	NA	AL845331.2	protein_coding
ENSG00000163060.8	0.801747	-1.04099	5.47774	-0.19004	0.849278	NA	TEKT4	protein_coding
ENSG00000172005.11	1.1209	-0.249274	4.50589	-0.0553218	0.955882	NA	MAL	protein_coding
ENSG00000144029.12	2941.93	-0.11515	0.302726	-0.380376	0.703666	0.857955	MRPS5	protein_coding
ENSG00000144026.12	832.985	0.0155585	0.330053	0.0471393	0.962402	0.984892	ZNF514	protein_coding
ENSG00000275111.5	400.414	-0.452799	0.345691	-1.30984	0.190251	0.421277	ZNF2	protein_coding
ENSG00000233757.6	4.15979	0.281615	2.18747	0.12874	0.897563	NA	AC092835.1	protein_coding
ENSG00000115041.13	1.83245	0.507116	3.51192	0.144398	0.885186	NA	KCNIP3	protein_coding
ENSG00000115042.10	729.519	-0.51123	0.38624	-1.32361	0.185634	0.415477	FAHD2A	protein_coding
ENSG00000144010.9	0.581778	2.09072	6.20595	0.33689	0.7362	NA	TRIM43B	protein_coding
ENSG00000144015.4	1.24722	2.12901	4.31671	0.493202	0.62187	NA	TRIM43	protein_coding
ENSG00000174501.14	1308.79	0.180113	0.351514	0.512392	0.608376	0.799046	ANKRD36C	protein_coding
ENSG00000186281.12	1.18655	2.04687	4.40368	0.464808	0.642069	NA	GPAT2	protein_coding
ENSG00000274286.2	1.9807	0.329499	3.47041	0.0949453	0.924358	NA	ADRA2B	protein_coding
ENSG00000188886.3	1.35625	3.52291	4.00489	0.879653	0.379047	NA	ASTL	protein_coding
ENSG00000158050.5	1.28968	1.77322	4.46644	0.397011	0.69136	NA	DUSP2	protein_coding
ENSG00000084090.13	9851.11	-0.137237	0.319282	-0.42983	0.667319	0.836	STARD7	protein_coding
ENSG00000144021.2	2949.51	-0.260496	0.304337	-0.855948	0.392026	0.636116	CIAO1	protein_coding
ENSG00000144028.15	22594.5	-0.469077	0.348284	-1.34682	0.178037	0.40498	SNRNP200	protein_coding
ENSG00000163121.10	7.49141	-1.68401	1.69669	-0.992527	0.320941	NA	NEURL3	protein_coding
ENSG00000114982.18	2853.04	-0.429536	0.279848	-1.53489	0.12481	0.328524	KANSL3	protein_coding
ENSG00000249715.12	20.2732	-0.112809	1.06016	-0.106407	0.915259	0.965184	FER1L5	protein_coding
ENSG00000114988.11	1493.65	-0.469908	0.305596	-1.53768	0.124127	0.327772	LMAN2L	protein_coding
ENSG00000158158.12	817.068	-0.451266	0.384699	-1.17304	0.240782	0.48507	CNNM4	protein_coding
ENSG00000168763.16	2623.29	0.0950751	0.315523	0.301326	0.763166	0.891155	CNNM3	protein_coding
ENSG00000163126.15	23.046	-0.0251914	1.10544	-0.0227885	0.981819	0.992174	ANKRD23	protein_coding
ENSG00000213337.9	285.83	-0.0775532	0.497946	-0.155746	0.876233	0.945762	ANKRD39	protein_coding
ENSG00000168758.11	2099.76	-0.640841	0.431522	-1.48507	0.137524	0.347786	SEMA4C	protein_coding
ENSG00000135976.19	2256.57	0.0609307	0.353622	0.172305	0.863198	0.938708	ANKRD36	protein_coding
ENSG00000196912.12	742.366	-0.277515	0.35968	-0.771562	0.440374	0.677427	ANKRD36B	protein_coding
ENSG00000135940.6	3948.16	-0.669372	0.400795	-1.67011	0.0948973	0.275654	COX5B	protein_coding
ENSG00000115073.7	1805.18	-0.375272	0.370948	-1.01166	0.311702	0.560766	ACTR1B	protein_coding
ENSG00000228486.10	198.753	0.176898	0.421645	0.419542	0.67482	0.840107	C2orf92	protein_coding
ENSG00000168658.18	10.4404	0.0434195	2.13049	0.0203801	0.98374	0.99289	VWA3B	protein_coding
ENSG00000144191.11	4.94707	0.573649	2.79038	0.205581	0.837118	NA	CNGA3	protein_coding
ENSG00000040933.15	1484.09	-0.106003	0.331317	-0.319945	0.74901	0.882759	INPP4A	protein_coding
ENSG00000183513.9	963.783	0.446513	0.306241	1.45805	0.144828	0.358546	COA5	protein_coding
ENSG00000115446.11	1473.87	0.293059	0.334124	0.877097	0.380434	0.624946	UNC50	protein_coding
ENSG00000071073.13	5306.93	-0.256321	0.34328	-0.746681	0.455256	0.689477	MGAT4A	protein_coding
ENSG00000196872.12	22.0422	-1.13022	1.02481	-1.10286	0.270088	0.517291	KIAA1211L	protein_coding
ENSG00000135951.15	299.575	-0.179949	0.451767	-0.398323	0.690392	0.849561	TSGA10	protein_coding
ENSG00000273045.6	61.6749	0.218235	0.65636	0.332493	0.739517	0.878197	C2orf15	protein_coding
ENSG00000241962.9	10.3578	0.356183	1.37604	0.258846	0.795754	0.907361	AC079447.1	protein_coding
ENSG00000273155.1	6.08516	-0.657994	1.7171	-0.383201	0.70157	NA	AC092587.1	protein_coding
ENSG00000158411.11	749.313	-0.217437	0.317797	-0.684201	0.493848	0.718237	MITD1	protein_coding
ENSG00000185414.20	1489.91	-0.275324	0.307861	-0.894314	0.371154	0.616667	MRPL30	protein_coding
ENSG00000185674.9	3.33446	0.0994522	2.67098	0.0372344	0.970298	NA	LYG2	protein_coding
ENSG00000115514.12	1729.31	0.290043	0.396739	0.731067	0.464738	0.696664	TXNDC9	protein_coding
ENSG00000158417.11	7674.23	0.167842	0.363612	0.461595	0.644371	0.821004	EIF5B	protein_coding
ENSG00000144218.18	44.7844	3.23953	1.90588	1.69975	0.0891776	0.264962	AFF3	protein_coding
ENSG00000170500.12	15.6959	-1.62906	1.61844	-1.00657	0.314143	0.563146	LONRF2	protein_coding
ENSG00000115526.11	495.308	-0.664901	0.36579	-1.81771	0.0691082	0.225062	CHST10	protein_coding
ENSG00000204640.1	1.04416	-0.934104	4.53854	-0.205816	0.836934	NA	NMS	protein_coding
ENSG00000115539.14	779.642	0.0358893	0.315242	0.113847	0.909359	0.961655	PDCL3	protein_coding
ENSG00000170485.17	3515.28	0.492234	0.301355	1.6334	0.102385	0.290278	NPAS2	protein_coding
ENSG00000071082.11	15717.4	0.146936	0.338395	0.434214	0.664133	0.833769	RPL31	protein_coding
ENSG00000204634.12	3121.69	-0.224421	0.335267	-0.669382	0.503252	0.724857	TBC1D8	protein_coding
ENSG00000163162.8	3517.44	0.0462895	0.302467	0.15304	0.878367	0.94682	RNF149	protein_coding
ENSG00000175874.10	15.7348	-0.611312	1.21606	-0.5027	0.615175	0.803195	CREG2	protein_coding
ENSG00000196460.14	7.43825	-1.9614	2.2929	-0.855426	0.392315	NA	RFX8	protein_coding
ENSG00000115594.12	2933.09	-0.456786	0.32415	-1.40918	0.158781	0.37923	IL1R1	protein_coding
ENSG00000115598.10	4.03507	4.07056	2.51942	1.61567	0.106166	NA	IL1RL2	protein_coding
ENSG00000115602.16	6.95244	-0.670308	2.10299	-0.318741	0.749923	NA	IL1RL1	protein_coding
ENSG00000115607.9	2.00092	0.367695	3.46554	0.1061	0.915503	NA	IL18RAP	protein_coding
ENSG00000180251.4	4.21879	1.3576	2.61429	0.5193	0.603552	NA	SLC9A4	protein_coding
ENSG00000115616.2	10.4211	-0.405297	1.75299	-0.231204	0.817156	0.916914	SLC9A2	protein_coding
ENSG00000135953.11	1250.42	-0.137923	0.304219	-0.453369	0.650283	0.824588	MFSD9	protein_coding
ENSG00000170417.16	301.571	-0.0599729	0.386573	-0.15514	0.876711	0.94598	TMEM182	protein_coding
ENSG00000198914.3	0.12467	-1.44765	7.05512	-0.205192	0.837422	NA	POU3F3	protein_coding
ENSG00000135972.9	1490.38	-0.0285009	0.297933	-0.095662	0.923789	0.968608	MRPS9	protein_coding
ENSG00000135973.2	1.48829	0.361151	4.12691	0.0875113	0.930265	NA	GPR45	protein_coding
ENSG00000135974.10	1692.91	0.231358	0.326382	0.708858	0.478413	0.706824	C2orf49	protein_coding
ENSG00000115641.19	381.663	-0.0240666	0.389031	-0.061863	0.950672	0.980036	FHL2	protein_coding
ENSG00000119147.10	0.499067	0.0255839	6.22805	0.00410784	0.996722	NA	C2orf40	protein_coding
ENSG00000115652.14	4133.5	-0.140418	0.2844	-0.493735	0.621493	0.807164	UXS1	protein_coding
ENSG00000153165.18	45.6718	1.41384	0.896763	1.57661	0.114886	0.312028	RGPD3	protein_coding
ENSG00000254126.7	2.1573	-0.676674	3.52033	-0.192219	0.847571	NA	CD8B2	protein_coding
ENSG00000144057.15	8.3372	-2.47345	2.48705	-0.994532	0.319964	NA	ST6GAL2	protein_coding
ENSG00000196862.9	5.23804	-0.472637	2.11451	-0.223521	0.82313	NA	RGPD4	protein_coding
ENSG00000115665.8	3.50676	-0.562236	3.11021	-0.180771	0.856547	NA	SLC5A7	protein_coding
ENSG00000196228.3	0.914143	2.11881	5.30205	0.39962	0.689436	NA	SULT1C3	protein_coding
ENSG00000198203.10	64.491	-0.822027	0.628233	-1.30848	0.190712	0.421606	SULT1C2	protein_coding
ENSG00000169756.16	3125.09	-0.460607	0.297501	-1.54825	0.121562	0.323484	LIMS1	protein_coding
ENSG00000153201.16	14242	0.647328	0.389462	1.66211	0.0964914	0.279046	RANBP2	protein_coding
ENSG00000163006.12	1110.67	-0.588286	0.331597	-1.7741	0.0760468	0.240229	CCDC138	protein_coding
ENSG00000186522.15	4560.24	0.14963	0.386287	0.387356	0.698493	0.855136	SEPT10	protein_coding
ENSG00000015568.13	2.6704	-0.942048	2.44185	-0.385793	0.69965	NA	RGPD5	protein_coding
ENSG00000144063.3	0.58573	-4.79984	6.16909	-0.778046	0.436542	NA	MALL	protein_coding
ENSG00000144061.12	89.672	-0.174402	0.581956	-0.299682	0.76442	0.89142	NPHP1	protein_coding
ENSG00000175701.10	247.673	-0.548794	0.492554	-1.11418	0.265202	0.512089	MTLN	protein_coding
ENSG00000257207.5	0.23964	-0.0383796	7.05095	-0.00544319	0.995657	NA	AC112229.3	protein_coding
ENSG00000256671.6	0.649337	-0.663704	5.26812	-0.125985	0.899744	NA	LIMS4	protein_coding
ENSG00000183054.11	15.9607	1.45277	1.07371	1.35303	0.176046	0.402383	RGPD6	protein_coding
ENSG00000169679.14	3958.98	-0.0650442	0.31567	-0.206051	0.836751	0.926314	BUB1	protein_coding
ENSG00000153093.18	12.7926	2.50765	2.1487	1.16705	0.243188	0.488066	ACOXL	protein_coding
ENSG00000153107.13	6045.69	-0.232425	0.301533	-0.77081	0.44082	0.677775	ANAPC1	protein_coding
ENSG00000153208.16	2093.22	0.442502	0.286442	1.54482	0.122389	0.324772	MERTK	protein_coding
ENSG00000153214.11	1763.38	0.369338	0.306471	1.20513	0.228152	0.470159	TMEM87B	protein_coding
ENSG00000144152.13	193.176	-0.825302	0.455613	-1.81141	0.0700773	0.22691	FBLN7	protein_coding
ENSG00000169629.11	324.155	0.0513863	0.451645	0.113776	0.909415	0.961655	RGPD8	protein_coding
ENSG00000125630.15	2877.93	0.171127	0.339745	0.503694	0.614477	0.802641	POLR1B	protein_coding
ENSG00000125611.15	436.486	-0.129814	0.491839	-0.263937	0.791828	0.905662	CHCHD5	protein_coding
ENSG00000169607.13	1050.72	0.342201	0.474093	0.721802	0.470416	0.701003	CKAP2L	protein_coding
ENSG00000115008.5	1.18988	0.146958	4.30524	0.0341347	0.97277	NA	IL1A	protein_coding
ENSG00000125538.11	0.604776	1.9529	6.12344	0.318922	0.749785	NA	IL1B	protein_coding
ENSG00000125571.9	8.40434	0.998389	1.65376	0.603709	0.546037	NA	IL37	protein_coding
ENSG00000136688.11	2.17853	0.475013	3.28313	0.144683	0.884961	NA	IL36G	protein_coding
ENSG00000136694.8	0.614475	0.524027	6.06311	0.0864287	0.931126	NA	IL36A	protein_coding
ENSG00000136696.10	1.64534	-0.783698	3.83704	-0.204246	0.838162	NA	IL36B	protein_coding
ENSG00000136695.14	2.6507	0.20823	3.30346	0.0630339	0.94974	NA	IL36RN	protein_coding
ENSG00000136697.12	0.12467	-1.44765	7.05512	-0.205192	0.837422	NA	IL1F10	protein_coding
ENSG00000125637.15	198.714	-0.417157	0.433786	-0.961665	0.336218	0.584174	PSD4	protein_coding
ENSG00000125618.17	198.826	-0.364293	0.465724	-0.782207	0.434093	0.672645	PAX8	protein_coding
ENSG00000136682.14	1653.02	0.452322	0.319893	1.41398	0.157368	0.377182	CBWD2	protein_coding
ENSG00000184492.6	32.0821	0.23637	0.809756	0.291903	0.770361	0.894293	FOXD4L1	protein_coding
ENSG00000144134.18	469.588	0.546377	0.348286	1.56876	0.116703	0.315048	RABL2A	protein_coding
ENSG00000115091.11	6241.37	0.194252	0.385014	0.504532	0.613887	0.802495	ACTR3	protein_coding
ENSG00000175497.16	13.5444	-1.59158	1.16404	-1.36729	0.171535	0.39716	DPP10	protein_coding
ENSG00000088205.13	5948.94	-0.161392	0.399333	-0.404153	0.6861	0.846755	DDX18	protein_coding
ENSG00000125633.11	4726.5	0.295196	0.28063	1.0519	0.292844	0.541369	CCDC93	protein_coding
ENSG00000125629.15	3885.89	-0.39292	0.339981	-1.15571	0.247799	0.492938	INSIG2	protein_coding
[truncated: 12,678 more rows]

## Sheet: TP53-dependent proteins 
Gene	BaseMean	log2FoldChange	lfcSE	stat	pvalue	padj	GeneName	GeneType
ENSG00000187634.12	11.3942	-2.59859	1.02128	-2.54445	0.0109451	0.0378199	SAMD11	protein_coding
ENSG00000187642.9	64.7985	6.59022	0.771293	8.54437	1.29236e-17	6.52826e-16	PERM1	protein_coding
ENSG00000162576.16	481.998	-1.28431	0.337798	-3.802	0.000143533	0.000970733	MXRA8	protein_coding
ENSG00000235098.8	643.079	2.0953	0.306403	6.83837	8.00993e-12	2.02878e-10	ANKRD65	protein_coding
ENSG00000179403.12	1365.18	-1.84918	0.342754	-5.39506	6.85012e-08	9.73773e-07	VWA1	protein_coding
ENSG00000215915.9	102.765	1.28528	0.413322	3.10963	0.00187323	0.00884823	ATAD3C	protein_coding
ENSG00000197530.12	1669.16	1.64577	0.259315	6.34663	2.20082e-10	4.66941e-09	MIB2	protein_coding
ENSG00000169885.10	10.8625	4.18858	1.12622	3.71913	0.000199908	0.00129882	CALML6	protein_coding
ENSG00000142609.18	41.7031	1.72383	0.529714	3.25426	0.00113687	0.00579939	CFAP74	protein_coding
ENSG00000197921.6	6.93015	2.90114	1.32049	2.19701	0.0280196	0.0795592	HES5	protein_coding
ENSG00000157873.17	634.395	2.29915	0.296148	7.76351	8.26131e-15	3.00984e-13	TNFRSF14	protein_coding
ENSG00000157870.16	619.257	-1.56503	0.28235	-5.54288	2.97537e-08	4.55423e-07	PRXL2B	protein_coding
ENSG00000198912.11	879.689	-1.34948	0.239914	-5.62484	1.85675e-08	2.92346e-07	C1orf174	protein_coding
ENSG00000116254.18	131.151	4.33632	0.430113	10.0818	6.64923e-24	5.71961e-22	CHD5	protein_coding
ENSG00000158286.13	348.357	-1.44008	0.33394	-4.31238	1.61503e-05	0.000139727	RNF207	protein_coding
ENSG00000116237.16	3518.15	-1.3655	0.242325	-5.63498	1.75082e-08	2.768e-07	ICMT	protein_coding
ENSG00000158292.7	126.251	2.76273	0.39063	7.0725	1.52162e-12	4.20616e-11	GPR153	protein_coding
ENSG00000069812.11	89.0719	4.51526	0.476864	9.46866	2.83455e-21	1.94192e-19	HES2	protein_coding
ENSG00000187017.16	1157.37	-1.17009	0.302343	-3.87007	0.000108804	0.00075853	ESPN	protein_coding
ENSG00000116649.10	2416.16	-1.68751	0.288091	-5.85756	4.69713e-09	8.19077e-08	SRM	protein_coding
ENSG00000132879.14	845.589	1.23475	0.293872	4.20168	2.64945e-05	0.00021768	FBXO44	protein_coding
ENSG00000116663.11	109.783	-1.29634	0.442935	-2.92671	0.00342568	0.0145915	FBXO6	protein_coding
ENSG00000116670.15	742.037	-1.5003	0.30453	-4.92661	8.367e-07	9.4772e-06	MAD2L2	protein_coding
ENSG00000162490.7	189.549	8.16056	0.716696	11.3864	4.88991e-30	6.48552e-28	DRAXIN	protein_coding
ENSG00000116685.16	2860.86	-1.68224	0.268443	-6.26667	3.68859e-10	7.58682e-09	KIAA2013	protein_coding
ENSG00000083444.17	5095.91	-1.49913	0.276092	-5.4298	5.64166e-08	8.17525e-07	PLOD1	protein_coding
ENSG00000116691.11	478.509	-1.63879	0.306526	-5.34635	8.97452e-08	1.25262e-06	MIIP	protein_coding
ENSG00000171729.14	671.975	-1.84458	0.268971	-6.85792	6.98689e-12	1.78647e-10	TMEM51	protein_coding
ENSG00000142634.13	918.28	-1.17274	0.295334	-3.97089	7.1605e-05	0.000525311	EFHD2	protein_coding
ENSG00000116771.6	3528.93	-1.61852	0.224476	-7.21019	5.58753e-13	1.62989e-11	AGMAT	protein_coding
ENSG00000162461.8	9.20559	4.52525	1.37718	3.28589	0.00101662	0.00527798	SLC25A34	protein_coding
ENSG00000162458.13	1111.01	-1.40589	0.299066	-4.70093	2.58981e-06	2.66646e-05	FBLIM1	protein_coding
ENSG00000187144.11	131.847	1.71312	0.456639	3.75158	0.000175726	0.00115735	SPATA21	protein_coding
ENSG00000219481.10	3414.99	1.39577	0.199614	6.99238	2.70256e-12	7.24738e-11	NBPF1	protein_coding
ENSG00000058453.17	416.343	1.70788	0.304388	5.61088	2.01304e-08	3.15294e-07	CROCC	protein_coding
ENSG00000142619.4	107.654	8.66359	1.08356	7.99546	1.29088e-15	5.18741e-14	PADI3	protein_coding
ENSG00000159339.13	936.029	10.2069	0.639764	15.9542	2.66262e-57	1.28015e-54	PADI4	protein_coding
ENSG00000117148.8	10.7759	-2.49219	1.09536	-2.27523	0.0228921	0.0678424	ACTL8	protein_coding
ENSG00000179023.8	861.37	4.70392	0.2814	16.7161	1.00004e-62	7.04826e-60	KLHDC7A	protein_coding
ENSG00000053372.5	2121.54	-1.55574	0.238118	-6.5335	6.42521e-11	1.46108e-09	MRTO4	protein_coding
ENSG00000158747.14	388.862	-1.47037	0.366224	-4.01496	5.94556e-05	0.000446522	NBL1	protein_coding
ENSG00000188257.11	1267.89	-1.40729	0.263764	-5.33543	9.53198e-08	1.32084e-06	PLA2G2A	protein_coding
ENSG00000162545.6	4354.08	-1.73706	0.209684	-8.28419	1.18918e-16	5.37208e-15	CAMK2N1	protein_coding
ENSG00000162551.14	924.999	3.38338	0.251814	13.4361	3.71661e-41	8.77773e-39	ALPL	protein_coding
ENSG00000142798.20	11666.1	1.86403	0.329988	5.64879	1.61584e-08	2.57578e-07	HSPG2	protein_coding
ENSG00000125945.15	512.133	1.06053	0.292637	3.62405	0.000290031	0.00179265	ZNF436	protein_coding
ENSG00000007968.7	877.692	-1.2752	0.284467	-4.48276	7.36849e-06	6.8909e-05	E2F2	protein_coding
ENSG00000117305.15	554.289	1.48054	0.251871	5.87819	4.14784e-09	7.29129e-08	HMGCL	protein_coding
ENSG00000179163.11	884.974	1.05832	0.254286	4.16192	3.15589e-05	0.000255316	FUCA1	protein_coding
ENSG00000142677.4	197.868	-1.05768	0.38352	-2.75782	0.00581886	0.0226791	IL22RA1	protein_coding
ENSG00000158055.15	176.72	11.8231	1.47792	7.99983	1.24591e-15	5.02169e-14	GRHL3	protein_coding
ENSG00000169504.15	6946.3	-1.28143	0.25174	-5.09028	3.57527e-07	4.41765e-06	CLIC4	protein_coding
ENSG00000188672.18	11.4422	3.6525	1.05674	3.45639	0.000547453	0.00309656	RHCE	protein_coding
ENSG00000117643.14	37.2744	4.24815	0.697328	6.09204	1.1148e-09	2.15711e-08	MAN1C1	protein_coding
ENSG00000182749.5	1223.3	1.0512	0.244642	4.29691	1.73198e-05	0.000148889	PAQR7	protein_coding
ENSG00000158022.6	11.1499	7.82071	1.7186	4.55062	5.3489e-06	5.11958e-05	TRIM63	protein_coding
ENSG00000176083.17	8.14102	7.37582	1.80375	4.08916	4.32942e-05	0.000336505	ZNF683	protein_coding
ENSG00000117676.14	1787.43	1.37241	0.276126	4.97023	6.68729e-07	7.74037e-06	RPS6KA1	protein_coding
ENSG00000131910.5	2642.76	2.08229	0.268092	7.76707	8.03203e-15	2.93028e-13	NR0B2	protein_coding
ENSG00000142765.18	1142.11	3.77873	0.301037	12.5524	3.85807e-36	7.31512e-34	SYTL1	protein_coding
ENSG00000174950.11	3.02885	5.48671	2.13316	2.57211	0.0101082	0.0355568	CD164L2	protein_coding
ENSG00000126705.14	1634.18	1.49833	0.321585	4.6592	3.17438e-06	3.20461e-05	AHDC1	protein_coding
ENSG00000117758.14	946.383	1.96792	0.294789	6.67569	2.46069e-11	5.88904e-10	STX12	protein_coding
ENSG00000169403.12	135.694	5.5606	0.464311	11.976	4.74503e-33	7.83773e-31	PTAFR	protein_coding
ENSG00000130766.5	1957.17	1.81147	0.276322	6.55567	5.5393e-11	1.26712e-09	SESN2	protein_coding
ENSG00000180198.16	3289.71	-1.6424	0.25621	-6.41038	1.45161e-10	3.13921e-09	RCC1	protein_coding
ENSG00000116329.11	86.1077	1.01005	0.449482	2.24715	0.0246306	0.0720271	OPRD1	protein_coding
ENSG00000060656.20	4542.92	1.21309	0.296534	4.09091	4.29684e-05	0.000334455	PTPRU	protein_coding
ENSG00000162511.8	745.489	7.27505	0.338187	21.5119	1.20433e-102	4.76621e-99	LAPTM5	protein_coding
ENSG00000060688.13	2210.4	-1.17729	0.216668	-5.43359	5.523e-08	8.03009e-07	SNRNP40	protein_coding
ENSG00000084636.18	989.211	-1.0471	0.339076	-3.08809	0.00201449	0.00938862	COL16A1	protein_coding
ENSG00000121775.18	354.123	-1.83108	0.301104	-6.08124	1.19254e-09	2.29507e-08	TMEM39B	protein_coding
ENSG00000116514.16	1327.47	2.02003	0.20921	9.65553	4.65742e-22	3.39828e-20	RNF19B	protein_coding
ENSG00000181817.6	638.609	-1.14634	0.305362	-3.75402	0.000174018	0.00114751	LSM10	protein_coding
ENSG00000116885.18	34.8513	2.63781	0.60903	4.33117	1.48317e-05	0.00012919	OSCP1	protein_coding
ENSG00000185090.14	927.428	-2.74278	0.285632	-9.6025	7.8029e-22	5.58737e-20	MANEAL	protein_coding
ENSG00000185668.7	95.3294	5.86286	0.562711	10.419	2.03168e-25	1.99638e-23	POU3F1	protein_coding
ENSG00000158315.11	149.432	-2.77833	0.381726	-7.27835	3.37935e-13	1.02693e-11	RHBDL2	protein_coding
ENSG00000183682.8	42.34	5.41642	0.737429	7.345	2.05752e-13	6.47157e-12	BMP8A	protein_coding
ENSG00000116985.12	126.867	1.804	0.342696	5.26412	1.4086e-07	1.88349e-06	BMP8B	protein_coding
ENSG00000049089.15	2267.16	1.41807	0.297382	4.76852	1.85584e-06	1.94954e-05	COL9A2	protein_coding
ENSG00000179862.6	202.37	1.30054	0.325218	3.99899	6.36147e-05	0.0004734	CITED4	protein_coding
ENSG00000044012.4	120.007	9.82192	1.48029	6.63512	3.24229e-11	7.66421e-10	GUCA2B	protein_coding
ENSG00000177181.15	223.842	-2.49672	0.30618	-8.15439	3.50942e-16	1.50219e-14	RIMKLA	protein_coding
ENSG00000117394.21	28790.5	-1.71797	0.226514	-7.58441	3.34012e-14	1.12693e-12	SLC2A1	protein_coding
ENSG00000186973.11	27.5563	2.02522	0.628515	3.22223	0.00127196	0.00638447	FAM183A	protein_coding
ENSG00000253313.5	36.9709	3.78244	0.678942	5.57108	2.53161e-08	3.91955e-07	C1orf210	protein_coding
ENSG00000132768.14	1340.21	-1.06065	0.239333	-4.4317	9.34935e-06	8.52717e-05	DPH2	protein_coding
ENSG00000187147.18	2363.47	-1.12902	0.254809	-4.43083	9.38704e-06	8.55864e-05	RNF220	protein_coding
ENSG00000126106.14	235.648	-1.73444	0.319216	-5.43345	5.52741e-08	8.0313e-07	TMEM53	protein_coding
ENSG00000173846.13	1095.25	2.63372	0.310875	8.47195	2.41322e-17	1.1678e-15	PLK3	protein_coding
ENSG00000132773.12	622.29	-1.10952	0.25383	-4.37111	1.23617e-05	0.000109917	TOE1	protein_coding
ENSG00000086015.21	2721.71	-1.59348	0.275404	-5.78598	7.20924e-09	1.21694e-07	MAST2	protein_coding
ENSG00000117461.15	329.029	1.04623	0.271986	3.84662	0.00011976	0.00082762	PIK3R3	protein_coding
ENSG00000117472.10	89.4266	4.19767	0.456549	9.19435	3.77253e-20	2.36213e-18	TSPAN1	protein_coding
ENSG00000171357.6	22.2231	7.24048	1.56773	4.61846	3.86607e-06	3.80864e-05	LURAP1	protein_coding
ENSG00000123473.15	1446.38	-1.10736	0.290981	-3.80562	0.000141447	0.000958069	STIL	protein_coding
ENSG00000117834.12	760.106	-2.99666	0.302854	-9.89472	4.38826e-23	3.42462e-21	SLC5A9	protein_coding
ENSG00000123080.11	341.389	-1.87768	0.317661	-5.91096	3.40118e-09	6.08461e-08	CDKN2C	protein_coding
ENSG00000085831.15	89.0593	1.6636	0.473064	3.51666	0.000437012	0.00255064	TTC39A	protein_coding
ENSG00000085840.13	1124.21	-1.31099	0.215984	-6.06986	1.28024e-09	2.44636e-08	ORC1	protein_coding
ENSG00000157184.7	885.805	1.92428	0.227773	8.44824	2.95731e-17	1.41677e-15	CPT2	protein_coding
ENSG00000157193.16	1516.15	-3.61024	0.227586	-15.8632	1.13903e-56	5.38021e-54	LRP8	protein_coding
ENSG00000162390.17	236.739	-1.26378	0.296592	-4.26101	2.03506e-05	0.000171493	ACOT11	protein_coding
ENSG00000162391.12	61.7313	-3.2033	0.715	-4.48014	7.45951e-06	6.97296e-05	FAM151A	protein_coding
ENSG00000169174.10	3834.34	-4.22893	0.295579	-14.3073	1.97033e-46	5.7662e-44	PCSK9	protein_coding
ENSG00000162409.11	2200.71	-1.18098	0.236994	-4.98318	6.25479e-07	7.2997e-06	PRKAA2	protein_coding
ENSG00000187889.13	186.632	2.12948	0.327747	6.49733	8.1756e-11	1.8328e-09	FYB2	protein_coding
ENSG00000157131.10	165.066	-3.04288	0.355216	-8.56629	1.06876e-17	5.48095e-16	C8A	protein_coding
ENSG00000162601.10	3787.11	1.16704	0.274378	4.2534	2.10547e-05	0.000176928	MYSM1	protein_coding
ENSG00000162607.13	3910.47	-1.04474	0.259077	-4.03256	5.51737e-05	0.000417391	USP1	protein_coding
ENSG00000079739.17	2823	-1.96787	0.233872	-8.41431	3.95226e-17	1.88005e-15	PGM1	protein_coding
ENSG00000185483.12	75.1835	1.29238	0.419348	3.08189	0.00205693	0.0095451	ROR1	protein_coding
ENSG00000162437.14	787.866	-1.23428	0.253989	-4.85958	1.17638e-06	1.28751e-05	RAVER2	protein_coding
ENSG00000116717.13	1272.59	1.72341	0.219544	7.84998	4.16118e-15	1.58242e-13	GADD45A	protein_coding
ENSG00000137968.16	919.201	2.37091	0.270685	8.75892	1.97133e-18	1.07008e-16	SLC44A5	protein_coding
ENSG00000117151.13	240.042	1.15667	0.278905	4.14719	3.36586e-05	0.000270515	CTBS	protein_coding
ENSG00000117155.16	866.808	-1.74636	0.308548	-5.65993	1.51435e-08	2.42549e-07	SSX2IP	protein_coding
ENSG00000162643.13	70.4246	10.4348	1.51103	6.90579	4.99231e-12	1.29742e-10	WDR63	protein_coding
ENSG00000122417.15	17.3515	2.05655	0.839641	2.44932	0.0143127	0.0467152	ODF2L	protein_coding
ENSG00000143013.13	1511.29	-1.10816	0.204298	-5.42425	5.81973e-08	8.41803e-07	LMO4	protein_coding
ENSG00000189195.13	89.8985	2.68423	0.391225	6.86109	6.83389e-12	1.74901e-10	BTBD8	protein_coding
ENSG00000162676.12	496.421	-2.17698	0.267129	-8.14953	3.65331e-16	1.55882e-14	GFI1	protein_coding
ENSG00000154511.12	407.6	-1.56606	0.289006	-5.41877	6.00117e-08	8.65892e-07	DIPK1A	protein_coding
ENSG00000137936.18	443.865	-1.2223	0.276844	-4.41513	1.00949e-05	9.13906e-05	BCAR3	protein_coding
ENSG00000134215.16	585.448	-1.90226	0.311096	-6.11471	9.67299e-10	1.88312e-08	VAV3	protein_coding
ENSG00000085491.17	754.599	-1.65134	0.221945	-7.44029	1.00463e-13	3.25889e-12	SLC25A24	protein_coding
ENSG00000116266.11	1333.89	1.57048	0.258005	6.08703	1.15027e-09	2.22005e-08	STXBP3	protein_coding
ENSG00000085433.15	427.644	1.2066	0.319363	3.77815	0.000157995	0.00105529	WDR47	protein_coding
ENSG00000134222.16	682.75	-1.28104	0.304994	-4.20021	2.66665e-05	0.00021896	PSRC1	protein_coding
ENSG00000168765.17	480.03	-1.86313	0.287884	-6.4718	9.68416e-11	2.14775e-09	GSTM4	protein_coding
ENSG00000134202.10	774.4	-1.13568	0.244803	-4.63914	3.49856e-06	3.49259e-05	GSTM3	protein_coding
ENSG00000198758.10	1297.39	-1.86211	0.29104	-6.39813	1.57288e-10	3.37705e-09	EPS8L3	protein_coding
ENSG00000116396.14	1348.46	1.4926	0.246914	6.04503	1.49385e-09	2.81655e-08	KCNC4	protein_coding
ENSG00000197852.11	1050.2	2.14431	0.220412	9.72864	2.27612e-22	1.68822e-20	INKA2	protein_coding
ENSG00000143079.15	881.004	1.16039	0.224303	5.17332	2.29973e-07	2.9331e-06	CTTNBP2NL	protein_coding
ENSG00000118655.6	600.455	-1.02255	0.24978	-4.09379	4.24382e-05	0.00033119	DCLRE1B	protein_coding
ENSG00000116774.12	159.81	-2.34622	0.422057	-5.55901	2.71314e-08	4.18138e-07	OLFML3	protein_coding
ENSG00000173218.15	1180.98	-1.42611	0.215012	-6.63271	3.29582e-11	7.77027e-10	VANGL1	protein_coding
ENSG00000134247.10	1381.77	-1.48892	0.247589	-6.01368	1.81363e-09	3.36065e-08	PTGFRN	protein_coding
ENSG00000092607.15	94.0443	2.7237	0.398155	6.84081	7.87452e-12	1.99916e-10	TBX15	protein_coding
ENSG00000092621.12	4322.04	-4.48549	0.267725	-16.7541	5.28974e-63	3.95614e-60	PHGDH	protein_coding
ENSG00000188610.12	304.838	1.03961	0.282103	3.6852	0.000228522	0.00145661	FAM72B	protein_coding
ENSG00000271601.4	816.675	-1.31532	0.261114	-5.03736	4.71994e-07	5.65301e-06	LIX1L	protein_coding
ENSG00000265972.5	1979.85	4.13521	0.268054	15.4268	1.08102e-53	4.54772e-51	TXNIP	protein_coding
ENSG00000131781.13	1076.95	-1.31278	0.270894	-4.8461	1.25913e-06	1.37083e-05	FMO5	protein_coding
ENSG00000116128.11	724.448	-1.94815	0.241812	-8.05647	7.85284e-16	3.22794e-14	BCL9	protein_coding
ENSG00000203814.6	3736.18	-2.46896	0.304557	-8.10671	5.20071e-16	2.15753e-14	HIST2H2BF	protein_coding
ENSG00000183598.3	1163.48	-2.39462	0.348697	-6.86735	6.54067e-12	1.68196e-10	HIST2H3D	protein_coding
ENSG00000203811.1	417.752	-1.26762	0.374456	-3.38523	0.000711199	0.00388562	HIST2H3C	protein_coding
ENSG00000184270.5	2323.07	-2.04923	0.352476	-5.81382	6.10615e-09	1.04589e-07	HIST2H2AB	protein_coding
ENSG00000023902.14	533.409	-2.11456	0.278283	-7.59859	2.99378e-14	1.01902e-12	PLEKHO1	protein_coding
ENSG00000143401.15	2993.74	-1.86663	0.229678	-8.12716	4.39468e-16	1.84303e-14	ANP32E	protein_coding
ENSG00000118298.12	61.0402	-2.81073	0.518945	-5.41624	6.08652e-08	8.76798e-07	CA14	protein_coding
ENSG00000143369.15	69.3154	2.19438	0.431564	5.08472	3.68167e-07	4.53248e-06	ECM1	protein_coding
ENSG00000197622.13	973.144	1.17018	0.242788	4.81976	1.43731e-06	1.54917e-05	CDC42SE1	protein_coding
ENSG00000143416.21	582.361	-1.28406	0.295706	-4.34233	1.40977e-05	0.000123476	SELENBP1	protein_coding
ENSG00000143375.15	215.774	1.24377	0.303521	4.09781	4.17079e-05	0.00032568	CGN	protein_coding
ENSG00000159409.14	65.839	8.91715	1.49907	5.94845	2.70702e-09	4.92125e-08	CELF3	protein_coding
ENSG00000178796.12	24.3236	8.95265	1.57595	5.6808	1.34062e-08	2.16397e-07	RIIAD1	protein_coding
ENSG00000186226.9	68.2122	10.4579	1.50315	6.95732	3.46801e-12	9.16317e-11	LCE1E	protein_coding
ENSG00000197084.5	124.311	11.3221	1.48354	7.63179	2.31508e-14	8.03238e-13	LCE1C	protein_coding
ENSG00000196734.8	119.36	11.2678	1.48537	7.58585	3.30321e-14	1.11588e-12	LCE1B	protein_coding
ENSG00000196154.12	86.5262	-1.92988	0.417146	-4.62639	3.72098e-06	3.68457e-05	S100A4	protein_coding
ENSG00000143537.13	1410.84	-1.02796	0.296085	-3.47183	0.00051693	0.00294994	ADAM15	protein_coding
ENSG00000169242.12	2095.16	-2.23254	0.287611	-7.76238	8.33513e-15	3.03264e-13	EFNA1	protein_coding
ENSG00000143630.10	260.586	-1.2757	0.345473	-3.69261	0.000221967	0.00142021	HCN3	protein_coding
ENSG00000143627.19	262	-2.67457	0.355499	-7.52342	5.33626e-14	1.7674e-12	PKLR	protein_coding
ENSG00000160752.14	4694.35	-2.00318	0.275126	-7.28094	3.31498e-13	1.0085e-11	FDPS	protein_coding
ENSG00000254726.3	1572.63	-1.31828	0.299035	-4.40844	1.04118e-05	9.39434e-05	MEX3A	protein_coding
ENSG00000160783.19	717.249	-1.59648	0.282087	-5.65952	1.518e-08	2.42988e-07	PMF1	protein_coding
ENSG00000027869.11	300.402	5.02552	0.383551	13.1026	3.18019e-39	7.01832e-37	SH2D2A	protein_coding
ENSG00000187800.13	215.628	3.69849	0.369246	10.0163	1.29216e-23	1.07377e-21	PEAR1	protein_coding
ENSG00000132694.18	2504.76	-1.16998	0.23859	-4.90373	9.40349e-07	1.05316e-05	ARHGEF11	protein_coding
ENSG00000162729.14	1137.28	-2.39263	0.275178	-8.69484	3.47307e-18	1.848e-16	IGSF8	protein_coding
ENSG00000018625.14	349.4	-4.72493	0.411687	-11.477	1.72113e-30	2.35227e-28	ATP1A2	protein_coding
ENSG00000143217.9	1514.31	3.42381	0.253427	13.5101	1.36403e-41	3.40047e-39	NECTIN4	protein_coding
ENSG00000158874.11	59520.2	-2.02639	0.255001	-7.94661	1.91679e-15	7.57821e-14	APOA2	protein_coding
ENSG00000248485.2	4.25551	5.5888	1.96312	2.84689	0.00441481	0.0180125	PCP4L1	protein_coding
ENSG00000158887.16	616.315	-2.37645	0.262125	-9.06609	1.23367e-19	7.36483e-18	MPZ	protein_coding
ENSG00000132185.16	75.3913	10.6053	1.50187	7.0614	1.64831e-12	4.5424e-11	FCRLA	protein_coding
ENSG00000143179.16	1970.01	-1.71104	0.22008	-7.77463	7.56691e-15	2.76434e-13	UCK2	protein_coding
ENSG00000143195.13	27.9822	4.64858	0.888523	5.23181	1.67856e-07	2.19921e-06	ILDR2	protein_coding
ENSG00000143194.13	8.94182	7.41312	1.74428	4.24997	2.13797e-05	0.000179268	MAEL	protein_coding
ENSG00000143158.11	1260.36	-1.61751	0.219205	-7.37899	1.59493e-13	5.05198e-12	MPC2	protein_coding
ENSG00000198734.10	8655.31	1.22643	0.288877	4.24553	2.18077e-05	0.000182515	F5	protein_coding
ENSG00000117586.11	474.236	3.45232	0.324131	10.651	1.72498e-26	1.79318e-24	TNFSF4	protein_coding
ENSG00000117601.13	636.359	-1.53033	0.260562	-5.8732	4.27462e-09	7.50749e-08	SERPINC1	protein_coding
ENSG00000116260.17	344.983	-1.12814	0.33032	-3.41531	0.0006371	0.00353239	QSOX1	protein_coding
ENSG00000135823.14	1956.67	1.5672	0.215085	7.28641	3.18314e-13	9.72792e-12	STX6	protein_coding
ENSG00000153029.14	1550.52	6.08377	0.242903	25.0461	1.92551e-138	2.59212e-134	MR1	protein_coding
ENSG00000116701.14	36.7092	-1.28066	0.570496	-2.24482	0.0247798	0.0723614	NCF2	protein_coding
ENSG00000143344.15	1520.88	1.41592	0.213628	6.62797	3.40342e-11	8.01695e-10	RGL1	protein_coding
ENSG00000198756.12	1384.01	-1.62964	0.232215	-7.01779	2.25413e-12	6.10565e-11	COLGALT2	protein_coding
ENSG00000198860.12	1037.05	-1.78111	0.292942	-6.08009	1.20117e-09	2.30838e-08	TSEN15	protein_coding
ENSG00000116668.13	255.831	1.0366	0.402446	2.57576	0.010002	0.0352342	SWT1	protein_coding
ENSG00000163362.11	1118.57	1.06821	0.272348	3.92223	8.77349e-05	0.000628071	INAVA	protein_coding
ENSG00000159176.14	1664.61	-1.04057	0.258292	-4.02865	5.60982e-05	0.000423315	CSRP1	protein_coding
ENSG00000117153.16	1305.48	1.17131	0.228741	5.1207	3.04406e-07	3.81024e-06	KLHL12	protein_coding
ENSG00000159388.6	2151.2	3.34097	0.225751	14.7994	1.47903e-49	5.04068e-47	BTG2	protein_coding
ENSG00000143842.15	1142.51	-2.05294	0.287499	-7.14068	9.28701e-13	2.62651e-11	SOX13	protein_coding
ENSG00000174514.13	42.6134	3.65897	0.567721	6.44501	1.15591e-10	2.53433e-09	MFSD4A	protein_coding
ENSG00000263528.8	432.725	-1.08294	0.312289	-3.46774	0.000524859	0.00299012	IKBKE	protein_coding
ENSG00000266094.7	74.256	3.30089	0.474091	6.96257	3.34113e-12	8.854e-11	RASSF5	protein_coding
ENSG00000008118.10	27.4553	7.69679	1.56176	4.92829	8.29515e-07	9.40373e-06	CAMK1G	protein_coding
ENSG00000196878.15	19.9772	4.13679	0.859144	4.81501	1.47192e-06	1.58329e-05	LAMB3	protein_coding
ENSG00000054392.13	651.181	3.30215	0.231818	14.2446	4.84529e-46	1.38782e-43	HHAT	protein_coding
ENSG00000170385.10	3912.93	1.6129	0.30737	5.24741	1.5425e-07	2.0408e-06	SLC30A1	protein_coding
ENSG00000143493.13	1392.78	-1.53273	0.262042	-5.84918	4.9399e-09	8.56971e-08	INTS7	protein_coding
ENSG00000143476.18	2008.53	-1.18313	0.240593	-4.91756	8.76283e-07	9.87156e-06	DTL	protein_coding
ENSG00000143494.15	125.548	-1.22931	0.365197	-3.36616	0.000762231	0.00413423	VASH2	protein_coding
ENSG00000143499.14	1854.4	-1.11264	0.239036	-4.65471	3.24436e-06	3.26546e-05	SMYD2	protein_coding
ENSG00000162814.11	11.7841	2.61322	0.964511	2.70937	0.00674115	0.0255488	SPATA17	protein_coding
ENSG00000186205.13	724.562	-2.06359	0.269107	-7.66831	1.74277e-14	6.11763e-13	MARC1	protein_coding
ENSG00000162909.18	362.95	2.31809	0.354751	6.53441	6.38587e-11	1.45459e-09	CAPN2	protein_coding
ENSG00000143815.15	5699.49	-1.16327	0.204784	-5.68046	1.34329e-08	2.16697e-07	LBR	protein_coding
ENSG00000143816.8	62.0933	5.98862	0.69925	8.56435	1.08683e-17	5.55253e-16	WNT9A	protein_coding
ENSG00000143632.14	73.4083	-2.11026	0.48045	-4.39226	1.12178e-05	0.000100777	ACTA1	protein_coding
ENSG00000135763.10	1267.34	-1.58449	0.22408	-7.07112	1.53686e-12	4.24395e-11	URB2	protein_coding
ENSG00000135744.8	17817.9	-1.74433	0.269066	-6.48291	8.99719e-11	2.00033e-09	AGT	protein_coding
ENSG00000135778.12	1818.23	2.05068	0.21309	9.62351	6.3621e-22	4.59231e-20	NTPCR	protein_coding
ENSG00000168243.11	994.502	-2.37525	0.25725	-9.23323	2.62591e-20	1.66745e-18	GNG4	protein_coding
ENSG00000116962.15	14631.5	-1.85644	0.211917	-8.76026	1.94796e-18	1.05953e-16	NID1	protein_coding
ENSG00000086619.13	322.587	1.1642	0.320538	3.63202	0.000281211	0.00174575	ERO1B	protein_coding
ENSG00000186197.14	48.4501	-1.5137	0.483957	-3.12775	0.00176151	0.00839713	EDARADD	protein_coding
[truncated: 2,026 more rows]

## Sheet: ADR effect for wt  (lncRNA)
Gene	BaseMean	log2FoldChange	lfcSE	stat	pvalue	padj	GeneName	GeneType
[truncated: 1,258 more rows]

[truncated: 2 more sheets: ADR effect for wt vs KO (lncRNA, TP53-dependent lncRNAs ]
