# Supplementary material for: TP53-inducible putative long noncoding RNAs encode functional polypeptides that suppress cell proliferation
Source: HighWire-hosted journal article supplement (doi:10.1101/gr.275831.121), 2022-05-24
Supplement: Supplemental_Table_S3.xlsx [file Supplemental_Table_S3.xlsx]

## Sheet: README
Supplemental Table S3：LncRNAs differentially expressed upon DNA damage treatment with ADR identified by the RNA-seq analysis.
The table below indicates figures that the other tabs are corresponding to.
tab name	Figure
WT+ vs WT- (lncRNAs)	S3A,1D,1E
WT+ vs KO+ (lncRNAs)	S3A,1D,1E
380 overlapped lncRNAs	1F

## Sheet: WT+ vs  WT- (lncRNAs)
Gene	BaseMean	log2FoldChange	lfcSE	Stat	pvalue	padj	Genename	Genetype	Scale
ENSG00000272512.1	38.7533	-1.79702	0.583667	-3.07885	0.00207803	0.00833139	AL645608.7	lincRNA	DiffExprLncRNA
ENSG00000223823.1	52.7901	-3.64154	0.630713	-5.77369	7.7555e-09	9.37092e-08	LINC01342	lincRNA	DiffExprLncRNA
ENSG00000272141.1	18.7539	-4.67302	1.10891	-4.21407	2.50808e-05	0.000163058	AL390719.2	lincRNA	DiffExprLncRNA
ENSG00000225905.1	31.8776	2.84867	0.714265	3.98826	6.65605e-05	0.000395977	AL391244.1	antisense	DiffExprLncRNA
ENSG00000238164.6	434.582	3.90784	0.31665	12.3412	5.4322e-35	5.6278e-33	TNFRSF14-AS1	antisense	DiffExprLncRNA
ENSG00000236423.5	120.254	-1.66354	0.386654	-4.30241	1.68947e-05	0.000114056	LINC01134	lincRNA	DiffExprLncRNA
ENSG00000270035.1	9.88022	3.55008	1.28726	2.75786	0.00581805	0.0201891	AL359881.2	lincRNA	DiffExprLncRNA
ENSG00000269978.1	21.5697	1.86612	0.753457	2.47675	0.0132585	0.0402557	AL359881.1	lincRNA	DiffExprLncRNA
ENSG00000234546.3	130.17	2.28228	0.357048	6.39208	1.63643e-10	2.46887e-09	LNCTAM34A	lincRNA	DiffExprLncRNA
ENSG00000272482.1	238.952	1.28909	0.275784	4.67429	2.94978e-06	2.32157e-05	AC254633.1	lincRNA	DiffExprLncRNA
ENSG00000175147.12	179.661	-2.48212	0.331317	-7.49166	6.80083e-14	1.5365e-12	TMEM51-AS1	antisense	DiffExprLncRNA
ENSG00000272510.1	28.6798	-1.63668	0.657077	-2.49085	0.0127436	0.0389835	AL121992.3	antisense	DiffExprLncRNA
ENSG00000233421.4	49.9792	1.58996	0.543897	2.92327	0.00346371	0.0129637	LINC01783	lincRNA	DiffExprLncRNA
ENSG00000233431.1	5.98196	5.97577	1.94781	3.06794	0.00215541	0.00859734	LINC02596	antisense	DiffExprLncRNA
ENSG00000249087.6	149.156	1.20441	0.324404	3.71269	0.000205071	0.00109153	ZNF436-AS1	antisense	DiffExprLncRNA
ENSG00000228172.5	53.7882	1.24232	0.482922	2.57251	0.0100964	0.0320587	AL020996.1	antisense	DiffExprLncRNA
ENSG00000237429.1	30.1852	2.27792	0.660165	3.45053	0.000559493	0.00264616	BX293535.1	antisense	DiffExprLncRNA
ENSG00000270605.1	159.122	1.46235	0.31983	4.57229	4.82432e-06	3.65033e-05	AL353622.1	antisense	DiffExprLncRNA
ENSG00000197989.14	981.824	-1.19426	0.198755	-6.00868	1.8704e-09	2.43608e-08	SNHG12	antisense	DiffExprLncRNA
ENSG00000230523.1	3.81686	5.32794	2.18098	2.44291	0.0145693	0.043475	LINC01756	lincRNA	DiffExprLncRNA
ENSG00000228176.1	16.6987	7.45724	1.64489	4.53357	5.79938e-06	4.32091e-05	AC092265.1	lincRNA	DiffExprLncRNA
ENSG00000186056.10	33.3723	1.65898	0.630601	2.63079	0.00851872	0.0278177	MATN1-AS1	antisense	DiffExprLncRNA
ENSG00000229167.1	253.029	3.34399	0.310912	10.7554	5.58822e-27	3.55753e-25	AC114488.1	antisense	DiffExprLncRNA
ENSG00000230615.6	23.2067	2.4418	0.756024	3.2298	0.00123879	0.00531881	AL139220.2	lincRNA	DiffExprLncRNA
ENSG00000237424.1	113.329	-1.45014	0.362231	-4.00335	6.24527e-05	0.000374483	FOXD2-AS1	lincRNA	DiffExprLncRNA
ENSG00000225028.1	9.91354	6.70932	1.78421	3.76039	0.000169649	0.000920619	AC096541.1	lincRNA	DiffExprLncRNA
ENSG00000242396.1	21.9148	1.80045	0.751065	2.3972	0.0165208	0.0482777	AC096536.2	antisense	DiffExprLncRNA
ENSG00000234810.3	6.20239	6.02838	1.93133	3.12135	0.00180021	0.00736487	AL603840.1	lincRNA	DiffExprLncRNA
ENSG00000260971.4	34.8343	-1.80157	0.598377	-3.01075	0.002606	0.0101205	AC119674.1	lincRNA	DiffExprLncRNA
ENSG00000237352.3	5.06398	5.73441	2.02951	2.82551	0.00472052	0.0169037	LINC01358	lincRNA	DiffExprLncRNA
ENSG00000224209.7	4.55064	5.58109	2.0812	2.68167	0.00732549	0.0244575	LINC00466	processed_transcript	DiffExprLncRNA
ENSG00000223883.1	38.8541	8.67331	1.55883	5.56398	2.63686e-08	2.95787e-07	LINC01707	lincRNA	DiffExprLncRNA
ENSG00000229956.10	55.6547	1.76701	0.514863	3.432	0.000599156	0.00281081	ZRANB2-AS2	processed_transcript	DiffExprLncRNA
ENSG00000235927.4	12.5344	2.82329	1.06231	2.6577	0.00786755	0.0260154	NEXN-AS1	antisense	DiffExprLncRNA
ENSG00000285782.1	4.18224	5.45598	2.15357	2.53346	0.0112943	0.035206	AC116099.1	lincRNA	DiffExprLncRNA
ENSG00000271576.1	89.1084	-1.18934	0.404254	-2.94207	0.00326024	0.0123036	AL359504.2	lincRNA	DiffExprLncRNA
ENSG00000284882.1	8.23431	3.89363	1.50933	2.5797	0.00988856	0.0315164	AL359762.1	bidirectional_promoter_lncRNA	DiffExprLncRNA
ENSG00000236915.2	21.8287	2.8899	0.830591	3.47933	0.000502665	0.00240874	CLCA4-AS1	antisense	DiffExprLncRNA
ENSG00000233593.9	205.716	-1.11827	0.285766	-3.91323	9.1068e-05	0.00052671	LINC02609	processed_transcript	DiffExprLncRNA
ENSG00000223745.7	289.689	1.99391	0.28962	6.88456	5.7967e-12	1.04598e-10	CCDC18-AS1	processed_transcript	DiffExprLncRNA
ENSG00000224093.5	1696.77	1.18714	0.203605	5.83059	5.52328e-09	6.79733e-08	AL109613.1	antisense	DiffExprLncRNA
ENSG00000235501.5	170.801	-1.1431	0.305729	-3.73891	0.000184819	0.000993639	AC105942.1	antisense	DiffExprLncRNA
ENSG00000273382.1	42.1912	1.59046	0.585787	2.71507	0.00662611	0.0225025	AL356488.3	antisense	DiffExprLncRNA
ENSG00000235005.1	8.77801	5.04143	1.78228	2.82864	0.0046747	0.0167616	AL450468.1	antisense	DiffExprLncRNA
ENSG00000261055.1	32.8271	3.40344	0.713521	4.76993	1.84287e-06	1.50411e-05	AL450468.2	lincRNA	DiffExprLncRNA
ENSG00000227811.2	59.5389	3.04071	0.522432	5.8203	5.87423e-09	7.19026e-08	INKA2-AS1	bidirectional_promoter_lncRNA	DiffExprLncRNA
ENSG00000235527.6	14.392	2.376	0.952693	2.49398	0.0126319	0.0386807	HIPK1-AS1	antisense	DiffExprLncRNA
ENSG00000203865.9	85.8647	1.21133	0.418743	2.89279	0.0038184	0.0141014	ATP1A1-AS1	processed_transcript	DiffExprLncRNA
ENSG00000232650.5	63.7701	1.33528	0.461657	2.89237	0.00382352	0.0141126	LINC01780	lincRNA	DiffExprLncRNA
ENSG00000260941.1	156.69	10.6868	1.48112	7.21538	5.37821e-13	1.10847e-11	LINC00622	sense_overlapping	DiffExprLncRNA
ENSG00000233396.7	84.128	1.21935	0.401169	3.03949	0.00236977	0.00932137	LINC01719	lincRNA	DiffExprLncRNA
ENSG00000227733.9	11.7797	6.9528	1.72288	4.03558	5.44683e-05	0.000330682	AC239809.3	lincRNA	DiffExprLncRNA
ENSG00000228126.1	46.3795	2.7681	0.562614	4.92006	8.65166e-07	7.50499e-06	FALEC	lincRNA	DiffExprLncRNA
ENSG00000237975.6	179.876	5.83493	0.509179	11.4595	2.10773e-30	1.69408e-28	FLG-AS1	antisense	DiffExprLncRNA
ENSG00000236427.1	25.3898	3.94444	0.891311	4.42543	9.62485e-06	6.87053e-05	AL589986.2	lincRNA	DiffExprLncRNA
ENSG00000270361.1	14.1803	2.77265	0.9831	2.82031	0.00479774	0.0171217	AL451085.1	lincRNA	DiffExprLncRNA
ENSG00000225855.6	145.963	1.43673	0.340682	4.21721	2.47348e-05	0.000161155	RUSC1-AS1	antisense	DiffExprLncRNA
ENSG00000237390.1	41.4412	2.06008	0.585065	3.5211	0.000429753	0.00209509	AL139130.1	lincRNA	DiffExprLncRNA
ENSG00000272068.1	96.8065	2.9527	0.422537	6.98801	2.78812e-12	5.23195e-11	AL365181.2	lincRNA	DiffExprLncRNA
ENSG00000272405.1	2172.24	2.37698	0.190297	12.4909	8.36911e-36	9.30747e-34	AL365181.3	antisense	DiffExprLncRNA
ENSG00000229953.1	764.55	1.53809	0.23238	6.61887	3.61944e-11	5.99872e-10	AL590666.2	antisense	DiffExprLncRNA
ENSG00000228917.1	6.93617	6.18935	1.88667	3.28057	0.00103598	0.00455208	AL591806.1	antisense	DiffExprLncRNA
ENSG00000283317.1	3.99805	5.38939	2.21332	2.43498	0.0148925	0.0442745	AL831711.1	lincRNA	DiffExprLncRNA
ENSG00000236719.3	9.24923	6.60567	1.78564	3.69934	0.000216165	0.00114078	OVAAL	lincRNA	DiffExprLncRNA
ENSG00000228918.3	6.67365	4.63371	1.90834	2.42814	0.0151763	0.044976	LINC01344	lincRNA	DiffExprLncRNA
ENSG00000273004.1	58.3692	-1.49175	0.503211	-2.96447	0.00303209	0.0115643	AL078644.2	lincRNA	DiffExprLncRNA
ENSG00000230426.3	323.233	2.42863	0.264619	9.17785	4.39782e-20	1.71182e-18	ERVMER61-1	lincRNA	DiffExprLncRNA
ENSG00000234678.2	124.412	-1.13243	0.339919	-3.33148	0.000863869	0.00388349	ELF3-AS1	antisense	DiffExprLncRNA
ENSG00000233791.5	15.9901	2.98384	0.985095	3.02898	0.00245377	0.00960325	LINC01136	lincRNA	DiffExprLncRNA
ENSG00000261065.1	4.64755	-5.73088	2.07065	-2.76767	0.00564588	0.0196954	AL592146.1	antisense	DiffExprLncRNA
ENSG00000237074.2	3.88933	5.35264	2.18051	2.45476	0.0140978	0.0424025	AL596218.1	lincRNA	DiffExprLncRNA
ENSG00000153363.12	128.118	2.5843	0.360537	7.16792	7.61485e-13	1.5335e-11	LINC00467	lincRNA	DiffExprLncRNA
ENSG00000261314.1	3.96481	5.38582	2.16321	2.48974	0.0127837	0.0390667	AC105275.2	sense_overlapping	DiffExprLncRNA
ENSG00000228792.2	15.8538	2.96687	0.965991	3.07133	0.00213109	0.00851906	AL356310.1	lincRNA	DiffExprLncRNA
ENSG00000227764.1	9.46687	3.48972	1.30886	2.66623	0.00767076	0.0254388	LINC01693	lincRNA	DiffExprLncRNA
ENSG00000230461.8	189.317	1.86572	0.313878	5.94411	2.77959e-09	3.55565e-08	PROX1-AS1	processed_transcript	DiffExprLncRNA
ENSG00000281664.1	19.7216	2.73039	0.835042	3.26977	0.00107636	0.00470067	LINC00538	lincRNA	DiffExprLncRNA
ENSG00000225265.1	23.1921	2.32412	0.761438	3.05228	0.00227111	0.00898256	TAF1A-AS1	antisense	DiffExprLncRNA
ENSG00000237101.1	10.3816	6.76752	1.7918	3.77693	0.000158772	0.000867642	AC092809.4	antisense	DiffExprLncRNA
ENSG00000234476.2	27.0923	6.69832	1.565	4.28006	1.86839e-05	0.000124866	AC092811.1	lincRNA	DiffExprLncRNA
ENSG00000282418.1	21.4643	4.7479	1.09709	4.3277	1.50675e-05	0.000102945	AC092811.2	lincRNA	DiffExprLncRNA
ENSG00000282111.1	5.54109	5.86443	1.98574	2.95327	0.00314427	0.0119221	AL137793.2	lincRNA	DiffExprLncRNA
ENSG00000286071.1	14.1987	5.75513	1.66826	3.44977	0.000561056	0.00265263	AL136171.1	processed_transcript	DiffExprLncRNA
ENSG00000236358.1	21.0866	2.0361	0.76772	2.65214	0.00799828	0.0263613	AL355472.2	antisense	DiffExprLncRNA
ENSG00000273367.1	13.8032	2.73118	0.995636	2.74315	0.00608523	0.0209507	AL355472.3	antisense	DiffExprLncRNA
ENSG00000230628.1	14.5527	3.3728	1.11141	3.03472	0.00240762	0.0094457	AL160408.3	lincRNA	DiffExprLncRNA
ENSG00000258082.1	21.6576	3.46665	0.905418	3.82878	0.000128779	0.000719617	AL391832.3	lincRNA	DiffExprLncRNA
ENSG00000280587.1	441.836	1.14662	0.243839	4.70235	2.57185e-06	2.0436e-05	LINC01348	lincRNA	DiffExprLncRNA
ENSG00000227230.1	7.18984	6.23706	1.91641	3.25455	0.00113571	0.00493222	AL606534.1	antisense	DiffExprLncRNA
ENSG00000236790.5	17.9553	2.41187	0.854757	2.8217	0.004777	0.0170768	LINC00299	lincRNA	DiffExprLncRNA
ENSG00000236008.2	101.642	2.39653	0.402354	5.95627	2.58053e-09	3.31035e-08	LINC01814	lincRNA	DiffExprLncRNA
ENSG00000231083.1	91.883	1.16375	0.385171	3.02139	0.00251619	0.00981792	AC011747.1	lincRNA	DiffExprLncRNA
ENSG00000145063.14	4.95527	5.70597	2.03541	2.80335	0.00505741	0.0179007	AC062028.1	lincRNA	DiffExprLncRNA
ENSG00000230952.1	1297.32	2.36807	0.204439	11.5833	5.00829e-31	4.26441e-29	AC099344.1	lincRNA	DiffExprLncRNA
ENSG00000224184.5	10.2426	5.26675	1.75335	3.00382	0.00266617	0.0103262	MIR3681HG	lincRNA	DiffExprLncRNA
ENSG00000236204.6	78.466	1.345	0.413702	3.25112	0.0011495	0.00498572	LINC01376	lincRNA	DiffExprLncRNA
ENSG00000227210.1	23.5321	1.73823	0.722626	2.40543	0.0161533	0.0473563	AC079145.1	antisense	DiffExprLncRNA
ENSG00000228999.3	4.84655	5.67687	2.06252	2.75239	0.00591617	0.0204488	AC096570.1	lincRNA	DiffExprLncRNA
ENSG00000231636.1	9.72049	5.19555	1.76503	2.94361	0.0032441	0.0122596	AGBL5-AS1	antisense	DiffExprLncRNA
ENSG00000205334.2	67.3508	6.42687	0.931035	6.90293	5.09415e-12	9.24719e-11	LINC01460	lincRNA	DiffExprLncRNA
ENSG00000229951.5	5.10022	5.74381	2.03182	2.82693	0.00469971	0.0168402	AC104695.2	antisense	DiffExprLncRNA
ENSG00000260025.1	37.37	2.00198	0.594702	3.36635	0.00076169	0.00348393	CRIM1-DT	lincRNA	DiffExprLncRNA
ENSG00000236213.1	11.5202	5.44804	1.71242	3.18148	0.00146523	0.00616096	AC006369.1	antisense	DiffExprLncRNA
ENSG00000231312.6	748.88	1.09009	0.222498	4.89933	9.61648e-07	8.28915e-06	MAP4K3-DT	antisense	DiffExprLncRNA
ENSG00000227028.6	21.3188	7.80782	1.61492	4.83479	1.33287e-06	1.11916e-05	SLC8A1-AS1	antisense	DiffExprLncRNA
ENSG00000231826.5	14.3108	2.79818	0.992843	2.81835	0.0048271	0.0172129	LINC01819	lincRNA	DiffExprLncRNA
ENSG00000231336.1	6.6795	6.1353	1.90077	3.22779	0.00124751	0.00535206	AC017006.1	antisense	DiffExprLncRNA
ENSG00000228100.1	540.933	5.80024	0.327055	17.7348	2.26094e-70	1.02673e-67	LINC01820	lincRNA	DiffExprLncRNA
ENSG00000230773.8	34.6959	1.98962	0.608178	3.27144	0.00107	0.00467615	AC092650.1	lincRNA	DiffExprLncRNA
ENSG00000282890.1	4.43891	5.54165	2.12434	2.60865	0.00909009	0.0293596	AC009975.1	lincRNA	DiffExprLncRNA
ENSG00000285519.1	6.6825	6.14045	1.91907	3.19971	0.00137568	0.00583124	AC104781.2	antisense	DiffExprLncRNA
ENSG00000240401.8	32.7793	3.01797	0.685829	4.40046	1.08019e-05	7.61273e-05	AC012358.3	antisense	DiffExprLncRNA
ENSG00000212978.6	314.089	1.22086	0.256495	4.75979	1.93796e-06	1.57623e-05	AC016747.1	processed_transcript	DiffExprLncRNA
ENSG00000273302.1	11.0824	3.73637	1.25037	2.9882	0.00280625	0.0107997	AC016747.3	sense_intronic	DiffExprLncRNA
ENSG00000270820.5	109.408	1.58667	0.365647	4.33936	1.429e-05	9.81367e-05	AC016727.1	antisense	DiffExprLncRNA
ENSG00000226622.5	7.19284	6.24146	1.87375	3.33101	0.000865329	0.00388838	AC092155.1	antisense	DiffExprLncRNA
ENSG00000226605.1	3.78062	5.31545	2.18654	2.43099	0.0150578	0.044683	AC092567.1	antisense	DiffExprLncRNA
ENSG00000225889.7	29.2154	6.81164	1.55842	4.37086	1.23756e-05	8.60637e-05	AC012368.1	antisense	DiffExprLncRNA
ENSG00000204929.12	111.998	3.80705	0.438491	8.68217	3.88292e-18	1.27008e-16	AC007389.1	processed_transcript	DiffExprLncRNA
ENSG00000281920.1	18.2055	7.58305	1.62924	4.65434	3.25015e-06	2.54182e-05	AC007389.5	lincRNA	DiffExprLncRNA
ENSG00000236780.6	24.8469	2.44435	0.743248	3.28874	0.00100638	0.00444495	LINC01829	antisense	DiffExprLncRNA
ENSG00000278060.1	17.1678	2.68591	0.916184	2.93163	0.00337189	0.0126618	AC012366.1	antisense	DiffExprLncRNA
ENSG00000273245.1	45.7155	1.42517	0.526764	2.70553	0.00681959	0.0230767	AC092653.1	lincRNA	DiffExprLncRNA
ENSG00000225439.2	329.021	-1.34554	0.260269	-5.1698	2.34351e-07	2.23655e-06	BOLA3-AS1	antisense	DiffExprLncRNA
ENSG00000272183.1	67.2256	1.08949	0.448075	2.4315	0.0150366	0.0446493	AC005041.3	antisense	DiffExprLncRNA
ENSG00000204792.2	16.2354	-2.7616	0.932125	-2.9627	0.00304954	0.0116243	LINC01291	lincRNA	DiffExprLncRNA
ENSG00000230836.1	21.1408	-2.53787	0.794482	-3.19437	0.00140135	0.00592804	LINC01293	lincRNA	DiffExprLncRNA
ENSG00000225420.1	258.46	7.374	0.652886	11.2945	1.39745e-29	1.05768e-27	AC104134.1	antisense	DiffExprLncRNA
ENSG00000261600.1	60.0722	3.1145	0.534621	5.82562	5.69019e-09	6.98371e-08	AC233266.2	lincRNA	DiffExprLncRNA
ENSG00000286101.1	235.619	4.0805	0.353782	11.5339	8.89785e-31	7.39145e-29	AC093894.2	lincRNA	DiffExprLncRNA
ENSG00000228528.1	6.45906	6.08651	1.91521	3.17798	0.00148305	0.00622139	AC068057.1	lincRNA	DiffExprLncRNA
ENSG00000225328.1	13.1327	5.63922	1.69335	3.33021	0.000867819	0.00389841	LINC01594	antisense	DiffExprLncRNA
ENSG00000214184.3	119.835	1.40876	0.347319	4.0561	4.98985e-05	0.000305799	GCC2-AS1	antisense	DiffExprLncRNA
ENSG00000271590.1	114.624	-1.23029	0.394072	-3.12199	0.00179635	0.00735466	AC108463.3	lincRNA	DiffExprLncRNA
ENSG00000270190.1	127.816	-1.08389	0.353014	-3.07039	0.0021378	0.00853959	AC068491.3	lincRNA	DiffExprLncRNA
ENSG00000272563.1	8.18329	6.42708	1.8298	3.51246	0.000443983	0.00215637	AC016745.2	lincRNA	DiffExprLncRNA
ENSG00000243179.1	38.2171	1.74163	0.588692	2.95847	0.00309172	0.0117621	AC110769.1	lincRNA	DiffExprLncRNA
ENSG00000236682.1	134.962	-1.30546	0.330221	-3.9533	7.70811e-05	0.000453319	MAP3K2-DT	lincRNA	DiffExprLncRNA
ENSG00000286058.1	836.3	1.56149	0.21223	7.35751	1.87374e-13	4.06155e-12	AC018865.3	processed_transcript	DiffExprLncRNA
ENSG00000286208.1	74.5345	6.15182	0.834579	7.37117	1.69132e-13	3.69029e-12	AC093838.2	lincRNA	DiffExprLncRNA
ENSG00000224559.2	31.0061	6.89561	1.55496	4.4346	9.22442e-06	6.61589e-05	LINC01087	lincRNA	DiffExprLncRNA
ENSG00000231890.7	157.938	1.60868	0.333544	4.82298	1.41426e-06	1.18167e-05	DARS-AS1	antisense	DiffExprLncRNA
ENSG00000230569.1	4.14901	5.45285	2.14832	2.53819	0.0111426	0.0348648	AC114763.2	lincRNA	DiffExprLncRNA
ENSG00000226674.10	14.428	3.69607	1.09013	3.39049	0.000697676	0.00322908	TEX41	lincRNA	DiffExprLncRNA
ENSG00000286207.1	44.3005	2.17325	0.574183	3.78494	0.000153744	0.00084338	AC012443.2	antisense	DiffExprLncRNA
ENSG00000227708.1	3.99805	5.38939	2.21332	2.43498	0.0148925	0.0442745	LINC01850	lincRNA	DiffExprLncRNA
ENSG00000283436.1	7.00865	6.20301	1.8887	3.28427	0.00102248	0.00450562	LINC01958	lincRNA	DiffExprLncRNA
ENSG00000204380.4	22.7466	3.31692	0.848907	3.90729	9.33368e-05	0.00053846	PKP4-AS1	antisense	DiffExprLncRNA
ENSG00000228586.1	23.5594	7.95287	1.5948	4.98675	6.14045e-07	5.44803e-06	AC005042.2	lincRNA	DiffExprLncRNA
ENSG00000236283.4	519.203	1.31426	0.239366	5.4906	4.00564e-08	4.36043e-07	AC019197.1	antisense	DiffExprLncRNA
ENSG00000235934.1	6.6825	6.14045	1.91907	3.19971	0.00137568	0.00583124	AC007405.2	antisense	DiffExprLncRNA
ENSG00000238133.6	6.34734	6.05881	1.93874	3.12513	0.00177727	0.00728309	MAP3K20-AS1	antisense	DiffExprLncRNA
ENSG00000271151.1	39.5586	1.59758	0.603258	2.64826	0.00809078	0.026634	AC016737.1	lincRNA	DiffExprLncRNA
ENSG00000260868.1	14.9051	4.80142	1.30255	3.68616	0.000227659	0.00119335	LINC01960	lincRNA	DiffExprLncRNA
ENSG00000231453.1	6.38659	6.07173	1.91855	3.16475	0.00155218	0.00646869	LINC01305	lincRNA	DiffExprLncRNA
ENSG00000272729.1	13.3258	4.63287	1.32875	3.48664	0.000489122	0.00235129	AC009336.1	antisense	DiffExprLncRNA
ENSG00000234663.6	165.677	5.03301	0.459595	10.951	6.57424e-28	4.3904e-26	LINC01934	lincRNA	DiffExprLncRNA
ENSG00000231646.5	32.6214	-2.35367	0.661116	-3.56015	0.000370649	0.00184155	FSIP2-AS1	antisense	DiffExprLncRNA
ENSG00000237877.6	127.326	-1.25308	0.340103	-3.68442	0.000229222	0.00120038	LINC01473	lincRNA	DiffExprLncRNA
ENSG00000224063.5	1605.9	-2.96436	0.198739	-14.9159	2.59889e-50	5.32421e-48	AC007319.1	antisense	DiffExprLncRNA
ENSG00000228509.5	4.03729	5.40954	2.14675	2.51987	0.0117398	0.0363452	AC006460.1	antisense	DiffExprLncRNA
ENSG00000224099.1	3.81686	5.32794	2.18098	2.44291	0.0145693	0.043475	AC104823.1	lincRNA	DiffExprLncRNA
ENSG00000223725.6	30.433	2.3803	0.675601	3.52324	0.000426308	0.00208128	AC009226.1	antisense	DiffExprLncRNA
ENSG00000197585.9	9.98288	5.22599	1.80294	2.8986	0.00374834	0.0138784	AC068051.1	antisense	DiffExprLncRNA
ENSG00000231672.6	33.195	3.56319	0.732166	4.86664	1.13512e-06	9.62132e-06	DIRC3	lincRNA	DiffExprLncRNA
ENSG00000261338.2	64.6976	1.09176	0.442288	2.46844	0.0135705	0.0410657	AC021016.2	sense_overlapping	DiffExprLncRNA
ENSG00000237281.1	15.9436	2.74036	0.954308	2.87156	0.00408446	0.0149122	CATIP-AS2	antisense	DiffExprLncRNA
ENSG00000235070.3	6.23863	6.03602	1.93093	3.12596	0.00177223	0.00727117	AC062015.1	lincRNA	DiffExprLncRNA
ENSG00000235419.5	31.5038	5.90408	1.17513	5.02421	5.05509e-07	4.56382e-06	AC010149.1	antisense	DiffExprLncRNA
ENSG00000261829.1	15.4148	-3.59113	1.02819	-3.49269	0.000478182	0.00230439	AC009407.1	sense_overlapping	DiffExprLncRNA
ENSG00000222001.2	30.0942	-1.69733	0.635874	-2.66928	0.00760135	0.0252393	AC106876.1	processed_transcript	DiffExprLncRNA
ENSG00000280744.1	170.059	5.23857	0.474496	11.0403	2.44268e-28	1.6807e-26	LINC01173	lincRNA	DiffExprLncRNA
ENSG00000233611.3	8.92012	4.02289	1.44954	2.7753	0.0055151	0.0193273	AC019068.1	antisense	DiffExprLncRNA
ENSG00000124835.2	70.3227	2.37285	0.503004	4.71736	2.38928e-06	1.91079e-05	AC105760.1	antisense	DiffExprLncRNA
ENSG00000227252.1	182.449	1.59506	0.311548	5.11979	3.05872e-07	2.85806e-06	AC105760.2	antisense	DiffExprLncRNA
ENSG00000186235.10	20.6245	4.68103	1.08863	4.29994	1.70845e-05	0.000115223	LINC02610	processed_transcript	DiffExprLncRNA
ENSG00000233392.5	156.759	1.56749	0.334591	4.6848	2.80228e-06	2.21315e-05	AC104809.2	processed_transcript	DiffExprLncRNA
ENSG00000224272.2	70.2089	-3.19042	0.48548	-6.57167	4.97533e-11	8.06922e-10	AC131097.3	antisense	DiffExprLncRNA
ENSG00000237940.3	26.5264	2.05695	0.711385	2.89147	0.00383443	0.0141391	LINC01238	lincRNA	DiffExprLncRNA
ENSG00000231249.1	30.4799	1.69407	0.67299	2.51723	0.0118281	0.0365811	ITPR1-DT	antisense	DiffExprLncRNA
ENSG00000233912.1	29.164	2.70528	0.694575	3.89488	9.82489e-05	0.000563239	AC026202.2	antisense	DiffExprLncRNA
ENSG00000230082.1	117.363	-2.44411	0.37483	-6.5206	7.00263e-11	1.11579e-09	PRRT3-AS1	antisense	DiffExprLncRNA
ENSG00000269982.1	171.266	-1.87891	0.338609	-5.54891	2.87451e-08	3.20335e-07	AC018809.2	antisense	DiffExprLncRNA
ENSG00000270194.1	120.896	1.16904	0.345623	3.38242	0.000718496	0.00331362	AC097359.2	antisense	DiffExprLncRNA
ENSG00000232352.1	83.8486	2.918	0.44347	6.57992	4.70714e-11	7.66162e-10	SEMA3B-AS1	antisense	DiffExprLncRNA
ENSG00000244342.5	4.3302	5.50888	2.11045	2.61029	0.00904663	0.029247	LINC00698	lincRNA	DiffExprLncRNA
ENSG00000240405.6	9.17375	6.59154	1.79505	3.67207	0.000240594	0.001252	SAMMSON	lincRNA	DiffExprLncRNA
ENSG00000242741.1	31.4527	6.91346	1.55795	4.43754	9.09921e-06	6.53469e-05	LINC02005	lincRNA	DiffExprLncRNA
ENSG00000240241.5	65.1379	2.73091	0.498591	5.47725	4.31988e-08	4.67821e-07	AC108752.1	lincRNA	DiffExprLncRNA
ENSG00000243701.6	120.526	2.60353	0.368564	7.06398	1.61801e-12	3.1311e-11	DUBR	lincRNA	DiffExprLncRNA
ENSG00000206532.2	87.3239	1.47878	0.416044	3.55438	0.000378878	0.00187833	AC117402.1	lincRNA	DiffExprLncRNA
ENSG00000243276.5	9.42458	5.14769	1.80588	2.85052	0.00436476	0.0157832	AC068633.1	lincRNA	DiffExprLncRNA
ENSG00000282950.1	7.78455	4.85852	1.83039	2.65436	0.00794596	0.0262358	AC063952.4	lincRNA	DiffExprLncRNA
ENSG00000273454.1	10.8954	3.26013	1.19383	2.73082	0.00631761	0.0216224	AC112503.2	lincRNA	DiffExprLncRNA
ENSG00000241288.7	77.5071	2.03284	0.425435	4.77826	1.76815e-06	1.44762e-05	LINC02614	processed_transcript	DiffExprLncRNA
ENSG00000248243.1	172.606	7.79262	0.884923	8.80599	1.29703e-18	4.42306e-17	LINC02014	lincRNA	DiffExprLncRNA
ENSG00000244265.1	63.0988	1.55683	0.479861	3.24434	0.00117725	0.00508667	SIAH2-AS1	antisense	DiffExprLncRNA
ENSG00000270096.1	8.19223	3.25397	1.35498	2.40148	0.0163288	0.0477835	AC078795.2	antisense	DiffExprLncRNA
ENSG00000242808.8	20.2323	2.20351	0.791535	2.78384	0.00537197	0.0188646	SOX2-OT	sense_overlapping	DiffExprLncRNA
ENSG00000242512.8	7.12926	4.7347	1.87821	2.52086	0.0117067	0.03628	LINC01206	lincRNA	DiffExprLncRNA
ENSG00000286086.1	32.5439	3.39155	0.727982	4.65884	3.18002e-06	2.49054e-05	AC099661.1	lincRNA	DiffExprLncRNA
ENSG00000163915.7	7.1566	6.23483	1.87391	3.32718	0.000877284	0.00393342	IGF2BP2-AS1	antisense	DiffExprLncRNA
ENSG00000226859.1	59.3906	6.24046	0.941483	6.62833	3.39496e-11	5.64039e-10	LINC02051	lincRNA	DiffExprLncRNA
ENSG00000214146.2	9.08269	3.41027	1.36042	2.50678	0.0121837	0.0374946	LINC02026	lincRNA	DiffExprLncRNA
ENSG00000230102.7	48.2515	3.23025	0.578482	5.58401	2.35031e-08	2.65942e-07	LINC02028	processed_transcript	DiffExprLncRNA
ENSG00000231770.5	77.7673	1.20893	0.409664	2.95102	0.00316727	0.0119992	TMEM44-AS1	antisense	DiffExprLncRNA
ENSG00000235897.1	72.6994	3.30121	0.500169	6.6002	4.10602e-11	6.75502e-10	TM4SF19-AS1	antisense	DiffExprLncRNA
ENSG00000249673.6	1158.07	3.31478	0.221451	14.9685	1.18025e-50	2.43623e-48	NOP14-AS1	antisense	DiffExprLncRNA
ENSG00000246526.2	286.373	1.65007	0.263307	6.2667	3.68779e-10	5.2857e-09	LINC002481	lincRNA	DiffExprLncRNA
ENSG00000250371.1	19.4438	-2.38074	0.821386	-2.89844	0.00375021	0.0138815	AC007370.2	lincRNA	DiffExprLncRNA
ENSG00000247624.6	25.1123	2.4598	0.731823	3.36119	0.000776072	0.00353843	CPEB2-DT	lincRNA	DiffExprLncRNA
ENSG00000259959.1	241.414	-1.12635	0.273096	-4.12437	3.71748e-05	0.000233603	AC107068.1	lincRNA	DiffExprLncRNA
ENSG00000226950.6	2195.1	-1.73733	0.213611	-8.13314	4.18322e-16	1.15365e-14	DANCR	processed_transcript	DiffExprLncRNA
ENSG00000250696.5	15.2284	4.22285	1.16347	3.62953	0.000283935	0.00145148	AC111000.4	antisense	DiffExprLncRNA
ENSG00000250220.1	47.6159	1.26625	0.522466	2.42361	0.0153673	0.0454825	AC053527.1	antisense	DiffExprLncRNA
ENSG00000249307.6	130.208	7.9727	1.09547	7.2779	3.39051e-13	7.13369e-12	LINC01088	processed_transcript	DiffExprLncRNA
ENSG00000180769.9	36.474	1.88654	0.596836	3.1609	0.00157281	0.00654763	WDFY3-AS2	antisense	DiffExprLncRNA
ENSG00000251095.6	4172.17	2.73914	0.201586	13.588	4.71787e-42	7.10209e-40	AC097478.1	antisense	DiffExprLncRNA
ENSG00000246090.6	265.858	2.79119	0.304096	9.17865	4.3654e-20	1.70173e-18	AP002026.1	antisense	DiffExprLncRNA
ENSG00000254531.1	85.7503	1.31606	0.457916	2.87401	0.00405292	0.0148129	AP001816.1	lincRNA	DiffExprLncRNA
ENSG00000249604.1	4.69559	5.62254	2.09854	2.67927	0.00737836	0.0246159	AC096564.2	antisense	DiffExprLncRNA
ENSG00000269893.7	1264.36	-1.45712	0.195898	-7.43816	1.02094e-13	2.2764e-12	SNHG8	lincRNA	DiffExprLncRNA
ENSG00000249464.5	640.362	1.62679	0.27625	5.88884	3.88914e-09	4.90589e-08	LINC01091	lincRNA	DiffExprLncRNA
ENSG00000251432.6	46.3644	3.25628	0.60777	5.35774	8.42671e-08	8.63493e-07	LINC02615	lincRNA	DiffExprLncRNA
ENSG00000248429.5	1084.71	1.44503	0.209797	6.88773	5.6689e-12	1.02563e-10	FAM198B-AS1	antisense	DiffExprLncRNA
ENSG00000250968.1	4.25772	5.48677	2.11613	2.59283	0.00951897	0.0304703	LINC02382	lincRNA	DiffExprLncRNA
ENSG00000272870.2	29.8649	-1.79844	0.64292	-2.79729	0.00515329	0.0181857	AC097534.2	antisense	DiffExprLncRNA
ENSG00000251165.5	3.74438	5.30284	2.1958	2.41499	0.0157356	0.046361	F11-AS1	antisense	DiffExprLncRNA
ENSG00000250829.2	35.3906	3.66643	0.710122	5.16309	2.42904e-07	2.3109e-06	AC108865.1	lincRNA	DiffExprLncRNA
ENSG00000272218.1	21.3735	2.42593	0.782636	3.0997	0.00193718	0.00782989	AC108865.2	lincRNA	DiffExprLncRNA
ENSG00000225138.7	91.724	1.25641	0.430153	2.92085	0.00349077	0.0130542	SLC9A3-AS1	processed_transcript	DiffExprLncRNA
ENSG00000271781.1	73.8399	1.29603	0.436762	2.96736	0.00300373	0.0114666	AC026740.1	antisense	DiffExprLncRNA
ENSG00000271980.1	19.3473	2.8732	0.859668	3.34222	0.000831109	0.0037517	AC012640.4	antisense	DiffExprLncRNA
ENSG00000261360.1	69.7047	2.56753	0.489967	5.24022	1.60388e-07	1.57424e-06	AC010491.1	antisense	DiffExprLncRNA
ENSG00000250337.6	6579.87	1.66694	0.19005	8.77104	1.77021e-18	5.98424e-17	PURPL	lincRNA	DiffExprLncRNA
ENSG00000248587.7	26.8539	2.80785	0.731508	3.83845	0.000123816	0.000694157	GDNF-AS1	antisense	DiffExprLncRNA
ENSG00000251257.2	16.2277	3.87908	1.0563	3.67234	0.000240342	0.0012515	AC010457.1	antisense	DiffExprLncRNA
ENSG00000286048.1	55.8519	7.75004	1.50855	5.13743	2.78524e-07	2.61778e-06	AC008966.3	antisense	DiffExprLncRNA
ENSG00000247796.2	133.943	1.84996	0.352853	5.24286	1.58105e-07	1.55408e-06	AC008966.1	antisense	DiffExprLncRNA
ENSG00000237705.1	11.5348	4.40613	1.38789	3.1747	0.00149993	0.00628362	AC008937.2	antisense	DiffExprLncRNA
ENSG00000178722.12	4.87978	5.6795	2.05906	2.7583	0.00581032	0.0201674	C5orf64	processed_transcript	DiffExprLncRNA
ENSG00000271926.1	18.4232	3.73016	0.983892	3.79123	0.000149901	0.000824623	AC008972.1	lincRNA	DiffExprLncRNA
ENSG00000272081.1	44.9157	2.04467	0.542743	3.7673	0.000165023	0.000898379	AC008972.2	lincRNA	DiffExprLncRNA
ENSG00000271714.1	119.837	3.24983	0.412823	7.87223	3.48369e-15	8.82977e-14	AC010501.1	antisense	DiffExprLncRNA
ENSG00000249042.5	117.513	-1.0148	0.350316	-2.89683	0.0037696	0.0139457	AC008771.1	antisense	DiffExprLncRNA
ENSG00000251450.1	25.0505	1.76443	0.710234	2.4843	0.0129806	0.0395839	RASGRF2-AS1	antisense	DiffExprLncRNA
ENSG00000250320.5	8.18029	6.42333	1.87046	3.43409	0.000594553	0.00279306	AC113383.1	antisense	DiffExprLncRNA
ENSG00000248323.6	248.565	-1.27846	0.277383	-4.60898	4.04646e-06	3.11188e-05	LUCAT1	antisense	DiffExprLncRNA
ENSG00000281357.2	152.245	1.64389	0.320883	5.12301	3.00698e-07	2.81453e-06	ARRDC3-AS1	lincRNA	DiffExprLncRNA
ENSG00000237187.8	101.284	1.62518	0.373863	4.34698	1.38024e-05	9.50881e-05	NR2F1-AS1	antisense	DiffExprLncRNA
ENSG00000251513.2	41.0733	2.57817	0.651575	3.95683	7.59494e-05	0.000447243	LIX1-AS1	lincRNA	DiffExprLncRNA
ENSG00000279232.2	26.386	5.04825	1.04346	4.83797	1.31175e-06	1.1021e-05	AC008522.1	antisense	DiffExprLncRNA
ENSG00000248445.5	63.7419	-1.12047	0.448062	-2.5007	0.0123949	0.0380234	SEMA6A-AS1	antisense	DiffExprLncRNA
ENSG00000250891.1	3.81686	5.32794	2.18098	2.44291	0.0145693	0.043475	LINC02208	lincRNA	DiffExprLncRNA
ENSG00000248752.2	19.7485	4.60892	1.11506	4.13334	3.57533e-05	0.000225294	AC116362.1	lincRNA	DiffExprLncRNA
ENSG00000251169.2	37.4885	-1.63381	0.580153	-2.81617	0.00485993	0.0173187	LINC01843	lincRNA	DiffExprLncRNA
ENSG00000224186.8	167.282	-1.40112	0.323484	-4.33134	1.48205e-05	0.00010141	C5orf66	antisense	DiffExprLncRNA
ENSG00000248753.1	19.9873	-1.87316	0.782744	-2.39307	0.0167079	0.0487305	AC008406.2	lincRNA	DiffExprLncRNA
ENSG00000254363.6	46.6358	-1.58758	0.577281	-2.7501	0.00595768	0.0205818	AC011379.2	processed_transcript	DiffExprLncRNA
ENSG00000249637.1	50.643	-1.90866	0.504962	-3.77981	0.000156946	0.000859217	AC008438.1	antisense	DiffExprLncRNA
ENSG00000251205.2	5.50485	5.85582	1.98541	2.94943	0.00318361	0.0120545	AC016598.2	lincRNA	DiffExprLncRNA
ENSG00000249669.9	97.6481	1.58168	0.392472	4.03004	5.57666e-05	0.000337811	CARMN	lincRNA	DiffExprLncRNA
ENSG00000253522.6	234.125	-1.18711	0.275878	-4.30301	1.68491e-05	0.000113804	MIR3142HG	lincRNA	DiffExprLncRNA
ENSG00000254186.2	24.8273	4.18136	0.922292	4.53366	5.79707e-06	4.32037e-05	AC113414.1	antisense	DiffExprLncRNA
ENSG00000253686.1	236.81	1.70907	0.279844	6.10723	1.01373e-09	1.37555e-08	LINC01484	lincRNA	DiffExprLncRNA
ENSG00000246334.2	208.493	-1.22398	0.322154	-3.79938	0.00014506	0.000799765	PRR7-AS1	antisense	DiffExprLncRNA
ENSG00000250999.1	69.4555	2.15805	0.500775	4.30942	1.63682e-05	0.000110914	AC136604.3	antisense	DiffExprLncRNA
ENSG00000263667.2	4.40568	5.53868	2.10772	2.62781	0.00859362	0.0280319	AL035696.3	lincRNA	DiffExprLncRNA
ENSG00000250903.8	1124.97	1.06767	0.19571	5.45539	4.88654e-08	5.23775e-07	GMDS-DT	lincRNA	DiffExprLncRNA
ENSG00000230269.6	837.172	1.92665	0.206668	9.32248	1.13651e-20	4.70616e-19	LINC02525	lincRNA	DiffExprLncRNA
ENSG00000260604.2	885.697	-1.19283	0.22123	-5.39183	6.97424e-08	7.28631e-07	AL590004.3	lincRNA	DiffExprLncRNA
ENSG00000254821.1	15.2591	3.15583	1.01503	3.1091	0.00187661	0.00762767	AL136309.4	antisense	DiffExprLncRNA
ENSG00000234817.2	47.2249	2.86984	0.565433	5.07547	3.86536e-07	3.55929e-06	AL136309.2	lincRNA	DiffExprLncRNA
ENSG00000216863.9	4.77107	5.64987	2.05488	2.74949	0.00596882	0.0205942	LY86-AS1	antisense	DiffExprLncRNA
ENSG00000261189.1	363.215	-1.04647	0.251695	-4.1577	3.21464e-05	0.0002046	AL031058.1	antisense	DiffExprLncRNA
ENSG00000285219.1	96.1665	1.00354	0.373656	2.68573	0.00723706	0.0242306	AL591485.1	bidirectional_promoter_lncRNA	DiffExprLncRNA
ENSG00000183674.11	4.21848	5.46751	2.16514	2.52525	0.0115617	0.0358998	LINC00518	lincRNA	DiffExprLncRNA
ENSG00000229931.1	115.07	-1.08334	0.395331	-2.74034	0.00613762	0.0210991	AL137003.1	antisense	DiffExprLncRNA
ENSG00000272168.7	20.298	6.27456	1.60927	3.89901	9.65856e-05	0.000555204	CASC15	lincRNA	DiffExprLncRNA
ENSG00000261584.1	3.90349	-5.4781	2.19749	-2.4929	0.0126706	0.0387862	AL513548.1	lincRNA	DiffExprLncRNA
ENSG00000272468.1	39.8086	6.25129	1.15718	5.40219	6.58312e-08	6.90151e-07	AL021807.1	lincRNA	DiffExprLncRNA
ENSG00000214922.9	106.839	-1.45296	0.364719	-3.98378	6.78284e-05	0.00040264	HLA-F-AS1	processed_transcript	DiffExprLncRNA
ENSG00000206344.7	165.905	1.13658	0.305023	3.72622	0.000194371	0.00103844	HCG27	lincRNA	DiffExprLncRNA
ENSG00000206337.10	43.5296	1.73422	0.539127	3.21672	0.00129664	0.00553149	HCP5	sense_overlapping	DiffExprLncRNA
ENSG00000232940.5	58.1179	1.49215	0.486469	3.06731	0.00215993	0.00861384	HCG25	antisense	DiffExprLncRNA
ENSG00000197251.3	12.2236	7.00911	1.71161	4.09504	4.22097e-05	0.000261979	LINC00336	lincRNA	DiffExprLncRNA
ENSG00000225339.3	35.6387	3.846	0.727219	5.28864	1.23229e-07	1.23407e-06	AL354740.1	processed_transcript	DiffExprLncRNA
ENSG00000272374.1	114.461	1.40359	0.374807	3.74484	0.000180512	0.000972593	Z97832.2	lincRNA	DiffExprLncRNA
ENSG00000224666.3	3.85309	5.34033	2.17896	2.45086	0.0142516	0.0427283	Z84484.1	antisense	DiffExprLncRNA
ENSG00000281450.1	8.59987	3.3371	1.36108	2.4518	0.0142146	0.0427017	PANDAR	lincRNA	DiffExprLncRNA
ENSG00000285244.1	38.1781	1.74391	0.571565	3.05111	0.00227996	0.00900995	DINOL	bidirectional_promoter_lncRNA	DiffExprLncRNA
ENSG00000234753.5	84.0429	-2.28859	0.435919	-5.25004	1.52067e-07	1.4958e-06	FOXP4-AS1	antisense	DiffExprLncRNA
ENSG00000272223.1	28.1507	1.98864	0.681215	2.91925	0.0035087	0.0131159	AL136304.1	antisense	DiffExprLncRNA
ENSG00000236961.1	9.39418	6.62608	1.78618	3.70963	0.000207566	0.00110352	AL136131.2	lincRNA	DiffExprLncRNA
ENSG00000231881.1	21.1305	-2.66477	0.823776	-3.23482	0.0012172	0.00524265	AL109615.2	lincRNA	DiffExprLncRNA
ENSG00000266680.1	636.452	1.96472	0.22105	8.88813	6.21457e-19	2.17366e-17	AL135905.1	antisense	DiffExprLncRNA
ENSG00000236345.1	12.8153	5.60186	1.68511	3.32433	0.000886322	0.00396676	SCAT8	antisense	DiffExprLncRNA
ENSG00000227706.3	10.1164	3.60052	1.35942	2.64857	0.00808336	0.026616	AL713998.1	lincRNA	DiffExprLncRNA
ENSG00000225793.2	30.9109	1.52158	0.634603	2.39769	0.0164988	0.0482289	AL080250.1	lincRNA	DiffExprLncRNA
ENSG00000234155.1	38.4369	-1.55053	0.564418	-2.74713	0.00601201	0.0207196	LINC02535	lincRNA	DiffExprLncRNA
ENSG00000260000.2	71.7812	2.8912	0.48239	5.9935	2.05377e-09	2.66726e-08	AL133338.1	antisense	DiffExprLncRNA
ENSG00000230943.2	45.818	5.86402	0.998279	5.87413	4.25072e-09	5.32258e-08	LINC02541	lincRNA	DiffExprLncRNA
ENSG00000228624.7	90.9292	1.32288	0.424354	3.11741	0.00182449	0.0074497	HDAC2-AS2	antisense	DiffExprLncRNA
ENSG00000227954.6	4.77107	5.64987	2.05488	2.74949	0.00596882	0.0205942	TARID	antisense	DiffExprLncRNA
ENSG00000236700.5	4.25772	5.48677	2.11613	2.59283	0.00951897	0.0304703	LINC01010	lincRNA	DiffExprLncRNA
ENSG00000231028.8	22.6437	2.64455	0.838218	3.15497	0.00160514	0.00666696	LINC00271	lincRNA	DiffExprLncRNA
ENSG00000237596.6	13.8027	5.7084	1.67754	3.40283	0.000666914	0.00309722	AL138828.1	antisense	DiffExprLncRNA
ENSG00000225177.5	68.2071	1.16067	0.455963	2.54553	0.0109111	0.0342426	AL590617.2	antisense	DiffExprLncRNA
ENSG00000226571.2	5.1757	5.76917	2.01462	2.86366	0.00418782	0.0152364	AL592429.2	antisense	DiffExprLncRNA
ENSG00000233452.6	17.3114	2.68345	0.895176	2.99768	0.00272047	0.0105082	STXBP5-AS1	antisense	DiffExprLncRNA
ENSG00000272841.1	42.4991	1.45583	0.549038	2.65161	0.00801101	0.0263969	AL139393.2	antisense	DiffExprLncRNA
ENSG00000231720.1	128.595	-1.42084	0.338278	-4.20021	2.66662e-05	0.000172788	AL353747.3	lincRNA	DiffExprLncRNA
ENSG00000198221.8	101.305	-1.00687	0.364955	-2.7589	0.00579957	0.0201557	AFDN-DT	lincRNA	DiffExprLncRNA
ENSG00000282572.2	13.1898	2.65273	1.00607	2.63671	0.00837135	0.0274053	AC215522.2	processed_transcript	DiffExprLncRNA
ENSG00000225981.1	26.3168	4.0032	0.858397	4.66358	3.10763e-06	2.43875e-05	AC102953.1	antisense	DiffExprLncRNA
ENSG00000230487.8	59.4004	1.43797	0.463706	3.10102	0.00192852	0.00780431	PSMG3-AS1	lincRNA	DiffExprLncRNA
ENSG00000236039.2	14.9139	3.742	1.09049	3.4315	0.000600256	0.002815	AC019117.1	lincRNA	DiffExprLncRNA
ENSG00000230658.1	92.1852	3.1562	0.444882	7.09445	1.29863e-12	2.53647e-11	KLHL7-DT	lincRNA	DiffExprLncRNA
ENSG00000240990.10	6.93634	4.70086	1.87823	2.50281	0.0123211	0.0378566	HOXA11-AS	antisense	DiffExprLncRNA
ENSG00000272568.5	44.7968	1.89306	0.56853	3.32974	0.000869263	0.00390387	AC005162.3	antisense	DiffExprLncRNA
ENSG00000235669.1	27.7732	2.63419	0.727986	3.61846	0.000296362	0.00150681	AC004593.1	antisense	DiffExprLncRNA
ENSG00000272638.1	21.9889	-1.76921	0.739471	-2.39253	0.0167326	0.0487815	AC006027.1	antisense	DiffExprLncRNA
ENSG00000281332.1	176.843	-1.60919	0.305815	-5.26199	1.42507e-07	1.40735e-06	LINC00997	lincRNA	DiffExprLncRNA
ENSG00000224057.1	182.869	-1.98807	0.3383	-5.87666	4.18624e-09	5.24908e-08	EGFR-AS1	antisense	DiffExprLncRNA
ENSG00000223475.1	32.9294	8.4395	1.55833	5.41572	6.10419e-08	6.43657e-07	AC099681.1	antisense	DiffExprLncRNA
ENSG00000233977.1	19.0148	7.64671	1.62443	4.70731	2.51004e-06	1.9974e-05	AC099681.3	lincRNA	DiffExprLncRNA
ENSG00000231394.1	26.715	8.13411	1.57987	5.14859	2.62458e-07	2.48219e-06	AC099681.2	lincRNA	DiffExprLncRNA
ENSG00000179406.7	640.475	1.063	0.229483	4.63216	3.61874e-06	2.80512e-05	LINC00174	processed_transcript	DiffExprLncRNA
ENSG00000272831.1	108.117	1.05624	0.369197	2.8609	0.00422443	0.015343	AC027644.3	antisense	DiffExprLncRNA
ENSG00000234456.7	1091.13	-1.12418	0.206325	-5.44859	5.07698e-08	5.42846e-07	MAGI2-AS3	processed_transcript	DiffExprLncRNA
ENSG00000182165.17	596.514	2.08197	0.22946	9.07338	1.15383e-19	4.28902e-18	TP53TG1	lincRNA	DiffExprLncRNA
ENSG00000228113.7	5.76152	5.92117	1.96593	3.01189	0.00259628	0.0100903	AC003991.1	antisense	DiffExprLncRNA
ENSG00000236197.3	6.86069	6.17061	1.91251	3.22644	0.00125342	0.00537064	AC002429.2	antisense	DiffExprLncRNA
ENSG00000227053.1	9.98889	5.23312	1.74554	2.99799	0.00271766	0.0105018	AC105446.1	antisense	DiffExprLncRNA
ENSG00000232445.1	146.717	-1.00226	0.330122	-3.03602	0.00239721	0.00941166	AC006329.1	antisense	DiffExprLncRNA
ENSG00000226965.1	139.369	4.24198	0.453932	9.34496	9.19207e-21	3.84136e-19	AC092167.1	lincRNA	DiffExprLncRNA
ENSG00000227199.1	17.1781	-2.3707	0.882127	-2.68748	0.00719942	0.0241631	ST7-AS1	antisense	DiffExprLncRNA
ENSG00000226367.5	5.50184	5.85013	2.05035	2.85323	0.0043277	0.01567	ST7-AS2	antisense	DiffExprLncRNA
ENSG00000240499.7	3.88933	5.35264	2.18051	2.45476	0.0140978	0.0424025	AC004594.1	antisense	DiffExprLncRNA
ENSG00000273270.1	123.818	1.70094	0.36104	4.71122	2.46241e-06	1.96179e-05	AC090114.2	lincRNA	DiffExprLncRNA
ENSG00000285106.1	248.183	1.61279	0.270819	5.95521	2.59745e-09	3.33048e-08	AC016831.7	lincRNA	DiffExprLncRNA
ENSG00000226380.9	666.403	1.74133	0.215474	8.08139	6.40303e-16	1.74115e-14	AC016831.1	lincRNA	DiffExprLncRNA
ENSG00000236753.6	94.6685	1.13233	0.416224	2.72048	0.00651874	0.0221992	MKLN1-AS	processed_transcript	DiffExprLncRNA
ENSG00000273489.1	4.10977	5.43287	2.14332	2.53479	0.0112516	0.035125	AC008264.2	antisense	DiffExprLncRNA
ENSG00000227197.1	3.85309	5.34033	2.17896	2.45086	0.0142516	0.0427283	AC009365.3	antisense	DiffExprLncRNA
ENSG00000234352.9	5.39313	5.82327	2.01638	2.88798	0.00387727	0.0142685	AC009264.1	antisense	DiffExprLncRNA
ENSG00000260231.2	606.291	1.29085	0.221411	5.83012	5.53891e-09	6.81349e-08	KDM7A-DT	bidirectional_promoter_lncRNA	DiffExprLncRNA
ENSG00000182366.9	95.992	6.19669	0.73905	8.38468	5.08641e-17	1.51464e-15	FAM87A	lincRNA	DiffExprLncRNA
ENSG00000272293.1	25.3007	-2.36656	0.731762	-3.23406	0.00122045	0.00525332	AC083964.1	antisense	DiffExprLncRNA
ENSG00000253982.1	115.753	1.3875	0.380795	3.64369	0.000268753	0.0013819	AC100810.1	antisense	DiffExprLncRNA
ENSG00000245857.2	3.85309	5.34033	2.17896	2.45086	0.0142516	0.0427283	AF233439.1	lincRNA	DiffExprLncRNA
ENSG00000254625.1	12.6282	7.05676	1.7067	4.13474	3.55361e-05	0.000224184	AF233439.2	antisense	DiffExprLncRNA
ENSG00000284606.1	22.536	3.51932	0.867973	4.05465	5.021e-05	0.00030757	AC105233.5	processed_transcript	DiffExprLncRNA
ENSG00000248538.7	12.1178	5.51913	1.69758	3.25117	0.0011493	0.00498565	AC022784.1	lincRNA	DiffExprLncRNA
ENSG00000283674.2	87.2922	2.46429	0.426626	5.77622	7.63956e-09	9.23492e-08	AC068587.4	processed_transcript	DiffExprLncRNA
ENSG00000253671.2	130.262	2.79069	0.442935	6.30045	2.9678e-10	4.30814e-09	AC027117.1	processed_transcript	DiffExprLncRNA
ENSG00000253557.5	4.36644	5.51984	2.11183	2.61378	0.00895475	0.0290499	AC100849.1	lincRNA	DiffExprLncRNA
ENSG00000253125.1	22.5448	5.41799	1.23548	4.38532	1.15816e-05	8.11011e-05	AC055854.1	processed_transcript	DiffExprLncRNA
ENSG00000246130.1	4.146	5.44444	2.14661	2.5363	0.0112032	0.0350221	AC107959.2	antisense	DiffExprLncRNA
ENSG00000253616.5	31.8771	-2.08262	0.638222	-3.26316	0.00110176	0.00479701	AC107959.3	antisense	DiffExprLncRNA
ENSG00000246339.5	38.6735	2.39276	0.59566	4.01699	5.89451e-05	0.000355484	EXTL3-AS1	antisense	DiffExprLncRNA
ENSG00000285669.1	54.3054	1.2941	0.505754	2.55875	0.0105049	0.0331628	AC026979.4	lincRNA	DiffExprLncRNA
ENSG00000254109.5	149.962	2.64461	0.343341	7.70259	1.33335e-14	3.16738e-13	RBPMS-AS1	antisense	DiffExprLncRNA
ENSG00000260949.1	56.9486	-3.13154	0.546343	-5.73181	9.93622e-09	1.17863e-07	AP006545.1	sense_overlapping	DiffExprLncRNA
ENSG00000253474.1	6.86069	6.17061	1.91251	3.22644	0.00125342	0.00537064	AC022568.1	lincRNA	DiffExprLncRNA
ENSG00000272457.1	10.0527	3.58227	1.30297	2.74931	0.00597214	0.0206031	AC113194.1	antisense	DiffExprLncRNA
ENSG00000254119.5	8.44013	4.99122	1.79895	2.77452	0.0055283	0.019365	AC025524.2	lincRNA	DiffExprLncRNA
ENSG00000271966.1	31.8717	2.2766	0.68346	3.33099	0.000865384	0.00388838	AC021321.1	lincRNA	DiffExprLncRNA
ENSG00000246366.6	12.5285	2.56551	1.02359	2.50638	0.0121974	0.0375297	LACTB2-AS1	antisense	DiffExprLncRNA
ENSG00000254266.5	9.90753	6.70244	1.77297	3.78035	0.000156608	0.000857534	PKIA-AS1	lincRNA	DiffExprLncRNA
ENSG00000285744.1	121.936	1.28654	0.355263	3.62136	0.000293056	0.00149223	AC083837.1	bidirectional_promoter_lncRNA	DiffExprLncRNA
ENSG00000261618.2	226.044	2.11937	0.327491	6.47153	9.7013e-11	1.51306e-09	LINC02605	lincRNA	DiffExprLncRNA
ENSG00000254231.2	56.2609	1.23494	0.471566	2.61881	0.00882375	0.0286898	AC103760.1	processed_transcript	DiffExprLncRNA
ENSG00000248858.7	60.4218	1.13948	0.467335	2.43824	0.0147588	0.0439633	AC104211.1	processed_transcript	DiffExprLncRNA
ENSG00000271971.1	92.1254	1.44592	0.400624	3.60918	0.000307167	0.00155708	AC120053.1	antisense	DiffExprLncRNA
ENSG00000253666.1	167.548	4.42026	0.402126	10.9922	4.16447e-28	2.82966e-26	AP000424.1	antisense	DiffExprLncRNA
ENSG00000254364.1	15.053	7.3113	1.67781	4.35764	1.31472e-05	9.11042e-05	AP000424.2	antisense	DiffExprLncRNA
ENSG00000246263.2	159.028	2.84851	0.345623	8.24166	1.69836e-16	4.84557e-15	UBR5-AS1	antisense	DiffExprLncRNA
ENSG00000272037.1	8.98104	3.4161	1.37609	2.48246	0.0130479	0.0397446	AP002907.1	antisense	DiffExprLncRNA
ENSG00000283959.1	15.6809	5.90064	1.64987	3.57642	0.000348326	0.00173921	AP002851.1	bidirectional_promoter_lncRNA	DiffExprLncRNA
ENSG00000247081.7	100.156	4.44364	0.510166	8.71018	3.03392e-18	1.00444e-16	BAALC-AS1	antisense	DiffExprLncRNA
ENSG00000253851.1	4.69859	5.62983	2.06425	2.7273	0.00638558	0.0218112	AC025370.1	antisense	DiffExprLncRNA
ENSG00000272502.1	379.3	-1.74239	0.246327	-7.07348	1.51099e-12	2.93652e-11	AC104958.2	antisense	DiffExprLncRNA
ENSG00000245149.3	92.4992	-1.0633	0.407106	-2.61185	0.00900533	0.0291688	RNF139-AS1	lincRNA	DiffExprLncRNA
ENSG00000249816.6	8.32841	4.96922	1.79885	2.76245	0.00573697	0.0199764	LINC00964	lincRNA	DiffExprLncRNA
ENSG00000253111.2	16.3336	3.54408	1.00599	3.52297	0.000426733	0.00208298	AC091114.1	lincRNA	DiffExprLncRNA
ENSG00000286122.1	21.0831	2.83431	0.847693	3.34355	0.000827124	0.0037368	AC016074.2	lincRNA	DiffExprLncRNA
ENSG00000253438.3	95.5711	5.04463	1.16605	4.32626	1.51662e-05	0.00010354	PCAT1	antisense	DiffExprLncRNA
ENSG00000254166.2	10318.3	1.15716	0.20916	5.5324	3.15879e-08	3.5001e-07	CASC19	processed_transcript	DiffExprLncRNA
ENSG00000282961.1	71.7387	5.076	0.671552	7.55861	4.07407e-14	9.39139e-13	PRNCR1	lincRNA	DiffExprLncRNA
ENSG00000246228.6	10.0077	3.58466	1.34112	2.67288	0.0075203	0.0250007	CASC8	antisense	DiffExprLncRNA
ENSG00000286010.1	7.3742	4.78806	1.83861	2.60417	0.00920972	0.0296546	AC108925.1	lincRNA	DiffExprLncRNA
ENSG00000249375.7	10.5053	3.64751	1.26392	2.88586	0.00390344	0.0143435	CASC11	lincRNA	DiffExprLncRNA
ENSG00000249859.10	3692.81	1.11529	0.179402	6.2167	5.07707e-10	7.13067e-09	PVT1	lincRNA	DiffExprLncRNA
ENSG00000286034.1	53.871	7.69784	1.51008	5.09763	3.43934e-07	3.19072e-06	AC100822.1	lincRNA	DiffExprLncRNA
ENSG00000254275.6	29.756	6.83507	1.56404	4.37013	1.24171e-05	8.631e-05	LINC00824	processed_transcript	DiffExprLncRNA
ENSG00000229140.9	35.9982	3.69805	0.714308	5.17711	2.25349e-07	2.15972e-06	CCDC26	lincRNA	DiffExprLncRNA
ENSG00000261220.2	19.9861	-2.23132	0.799664	-2.79032	0.00526553	0.0185266	AC103706.1	lincRNA	DiffExprLncRNA
ENSG00000259820.1	690.248	1.26056	0.231866	5.43659	5.43114e-08	5.7783e-07	AC083843.3	lincRNA	DiffExprLncRNA
ENSG00000254101.6	6.27487	6.04363	1.93208	3.12805	0.00175971	0.00722853	LINC02055	lincRNA	DiffExprLncRNA
ENSG00000253196.1	48.798	-4.85097	0.762144	-6.3649	1.9542e-10	2.90613e-09	AC083841.1	antisense	DiffExprLncRNA
ENSG00000247317.3	20.3833	1.97998	0.778547	2.54317	0.010985	0.034439	LY6E-DT	lincRNA	DiffExprLncRNA
ENSG00000177335.10	167.097	1.62981	0.313561	5.19773	2.01734e-07	1.94848e-06	C8orf31	processed_transcript	DiffExprLncRNA
ENSG00000254389.3	39.7743	-1.37455	0.560649	-2.45172	0.0142175	0.0427047	RHPN1-AS1	antisense	DiffExprLncRNA
ENSG00000253931.1	47.9208	1.9158	0.530341	3.61239	0.000303385	0.00153878	AC105118.1	antisense	DiffExprLncRNA
ENSG00000236924.1	81.3535	-1.95583	0.420999	-4.6457	3.3893e-06	2.64457e-05	AL162411.1	lincRNA	DiffExprLncRNA
ENSG00000285911.1	14.5064	3.35139	1.04305	3.21306	0.00131327	0.00559646	AL391834.3	bidirectional_promoter_lncRNA	DiffExprLncRNA
ENSG00000260947.1	3.92557	5.3649	2.18628	2.4539	0.0141317	0.0424761	AL356489.2	lincRNA	DiffExprLncRNA
ENSG00000228352.2	4.65935	5.61221	2.08964	2.68573	0.00723707	0.0242306	AL354989.1	antisense	DiffExprLncRNA
ENSG00000230074.1	44.2234	5.38888	0.876956	6.14499	7.997e-10	1.10326e-08	AL162231.2	antisense	DiffExprLncRNA
ENSG00000234160.1	74.8282	-1.29318	0.419251	-3.0845	0.00203896	0.00819281	AL513165.1	antisense	DiffExprLncRNA
ENSG00000204860.4	91.7611	-1.00275	0.380817	-2.63316	0.00845942	0.0276504	FAM201A	antisense	DiffExprLncRNA
ENSG00000278175.3	10.1312	3.60063	1.28142	2.80987	0.00495611	0.0175878	GLIDR	lincRNA	DiffExprLncRNA
ENSG00000276462.1	15.3429	7.33646	1.6607	4.4177	9.97572e-06	7.09683e-05	BX255923.2	lincRNA	DiffExprLncRNA
ENSG00000238113.6	211.631	1.02469	0.286825	3.5725	0.000353583	0.00176351	LINC01410	lincRNA	DiffExprLncRNA
ENSG00000229422.2	76.5399	-1.22288	0.427152	-2.86286	0.00419832	0.0152644	AL512625.2	lincRNA	DiffExprLncRNA
ENSG00000234665.8	4.47816	5.56007	2.08879	2.66187	0.00777089	0.0257364	AL512625.3	lincRNA	DiffExprLncRNA
ENSG00000229109.1	25.9905	4.26112	0.899871	4.73525	2.18781e-06	1.76522e-05	AL137847.1	antisense	DiffExprLncRNA
ENSG00000237529.2	11.8975	3.39593	1.146	2.96329	0.00304365	0.0116035	AL137847.2	antisense	DiffExprLncRNA
ENSG00000271155.1	34.2132	-1.5489	0.598113	-2.58964	0.00960767	0.0307146	AL161729.1	antisense	DiffExprLncRNA
ENSG00000268926.3	24.2842	2.39671	0.735666	3.25787	0.00112251	0.00487798	AL354861.3	lincRNA	DiffExprLncRNA
ENSG00000230782.1	5.58033	5.87931	1.9861	2.96023	0.00307412	0.0117017	AL807761.4	antisense	DiffExprLncRNA
ENSG00000226047.1	4.36644	5.51984	2.11183	2.61378	0.00895475	0.0290499	AL807761.3	lincRNA	DiffExprLncRNA
ENSG00000256040.2	194.296	2.53283	0.352056	7.19441	6.27333e-13	1.27559e-11	PAPPA-AS1	antisense	DiffExprLncRNA
ENSG00000285820.1	103.46	10.0887	1.48604	6.78898	1.1293e-11	1.98388e-10	AL157829.1	antisense	DiffExprLncRNA
ENSG00000234156.2	11.7014	5.4691	1.72177	3.17643	0.001491	0.00625099	AL359636.2	antisense	DiffExprLncRNA
ENSG00000224020.1	9.21608	2.98397	1.23962	2.40716	0.0160771	0.0471684	MIR181A2HG	antisense	DiffExprLncRNA
ENSG00000234771.3	342.55	-1.20331	0.256232	-4.69617	2.6508e-06	2.10143e-05	SLC25A25-AS1	antisense	DiffExprLncRNA
ENSG00000224307.1	4.07653	5.42947	2.19229	2.47662	0.0132634	0.0402662	AL161785.1	lincRNA	DiffExprLncRNA
ENSG00000233901.5	205.781	4.83446	0.396289	12.1993	3.13397e-34	3.11647e-32	LINC01503	lincRNA	DiffExprLncRNA
ENSG00000260193.1	10.1183	3.12478	1.28035	2.44056	0.0146646	0.0437162	AL138781.1	lincRNA	DiffExprLncRNA
ENSG00000237886.1	37.1541	3.74258	0.698353	5.35914	8.36178e-08	8.58747e-07	NALT1	antisense	DiffExprLncRNA
ENSG00000279141.3	62.4436	9.36235	1.51118	6.19538	5.8143e-10	8.12005e-09	AL590226.2	lincRNA	DiffExprLncRNA
ENSG00000233016.6	1625.87	-1.45195	0.219427	-6.617	3.66568e-11	6.06797e-10	SNHG7	antisense	DiffExprLncRNA
ENSG00000231864.2	6.7393	-6.26647	1.90602	-3.28772	0.00101002	0.00445884	AL807752.3	antisense	DiffExprLncRNA
ENSG00000260996.1	8.11975	3.24135	1.35683	2.38892	0.0168981	0.0492219	BX255925.1	sense_overlapping	DiffExprLncRNA
ENSG00000205740.2	94.2219	1.32815	0.380138	3.49385	0.000476109	0.00229521	AL359878.1	processed_transcript	DiffExprLncRNA
ENSG00000231298.6	65.5509	5.13774	0.702698	7.31144	2.6429e-13	5.61709e-12	MANCR	lincRNA	DiffExprLncRNA
ENSG00000228951.1	38.7213	7.22065	1.53164	4.71433	2.42504e-06	1.93485e-05	AL365356.3	lincRNA	DiffExprLncRNA
ENSG00000176236.6	14.0308	-3.46837	1.06778	-3.2482	0.00116139	0.00503246	C10orf111	bidirectional_promoter_lncRNA	DiffExprLncRNA
ENSG00000230109.1	9.02579	6.56686	1.81078	3.62654	0.000287242	0.00146563	LINC02643	lincRNA	DiffExprLncRNA
ENSG00000254635.5	304.531	1.39743	0.278922	5.01011	5.43988e-07	4.87888e-06	WAC-AS1	antisense	DiffExprLncRNA
ENSG00000259994.1	43.0492	-1.36293	0.532701	-2.55853	0.0105117	0.0331765	AL353796.1	sense_overlapping	DiffExprLncRNA
ENSG00000237036.4	155.043	1.30422	0.317638	4.106	4.02573e-05	0.000251005	ZEB1-AS1	antisense	DiffExprLncRNA
ENSG00000271335.5	69.9524	1.41181	0.441686	3.1964	0.00139152	0.00589046	AL117336.2	antisense	DiffExprLncRNA
ENSG00000233515.1	5.94572	5.96781	1.94907	3.06188	0.00219952	0.00873493	LINC01518	lincRNA	DiffExprLncRNA
ENSG00000259869.2	3.92858	5.37377	2.17699	2.46844	0.0135704	0.0410657	AL022344.1	lincRNA	DiffExprLncRNA
ENSG00000273008.1	35.021	1.74861	0.613421	2.85058	0.00436391	0.0157822	AC010864.1	lincRNA	DiffExprLncRNA
ENSG00000231187.2	66.5081	-1.81232	0.462517	-3.91838	8.91444e-05	0.000517121	AL356056.2	antisense	DiffExprLncRNA
ENSG00000226200.6	95.3831	1.35441	0.388678	3.48465	0.000492778	0.00236761	SGMS1-AS1	antisense	DiffExprLncRNA
ENSG00000232682.2	9.75957	6.67961	1.78753	3.73678	0.000186395	0.00100093	AL592430.1	antisense	DiffExprLncRNA
ENSG00000238280.2	11.0304	2.90619	1.14769	2.53221	0.0113346	0.0353235	AC067751.1	antisense	DiffExprLncRNA
ENSG00000237512.6	76.9952	6.62196	0.937906	7.06037	1.66061e-12	3.20899e-11	UNC5B-AS1	antisense	DiffExprLncRNA
ENSG00000221817.9	60.1745	1.46397	0.47239	3.09907	0.00194131	0.00784209	PPP3CB-AS1	processed_transcript	DiffExprLncRNA
ENSG00000232342.7	4.00105	5.39774	2.15326	2.50677	0.012184	0.0374946	AC022540.1	antisense	DiffExprLncRNA
ENSG00000224596.7	172.465	2.44011	0.330695	7.37874	1.59792e-13	3.49987e-12	ZMIZ1-AS1	antisense	DiffExprLncRNA
ENSG00000229569.1	29.9884	6.85034	1.55848	4.39553	1.10501e-05	7.77187e-05	AL356753.1	lincRNA	DiffExprLncRNA
ENSG00000237523.1	53.0773	-1.36246	0.492017	-2.76913	0.00562057	0.0196237	LINC00857	lincRNA	DiffExprLncRNA
ENSG00000285972.1	21.4453	5.33584	1.23564	4.31828	1.57249e-05	0.000107007	CERNA2	lincRNA	DiffExprLncRNA
ENSG00000224750.6	8.4762	6.47706	1.82292	3.55313	0.00038068	0.00188589	AL391704.1	lincRNA	DiffExprLncRNA
ENSG00000224934.4	270.555	1.0208	0.275712	3.70242	0.000213556	0.0011296	AL391684.1	bidirectional_promoter_lncRNA	DiffExprLncRNA
ENSG00000227492.1	11.9063	2.73343	1.07852	2.53442	0.0112634	0.035154	AL138921.1	antisense	DiffExprLncRNA
ENSG00000235823.2	276.732	-1.03099	0.259847	-3.96769	7.25731e-05	0.000428565	OLMALINC	lincRNA	DiffExprLncRNA
ENSG00000273162.1	55.5996	-2.00858	0.544356	-3.68983	0.000224403	0.00117832	AL133215.2	lincRNA	DiffExprLncRNA
ENSG00000227128.4	5.57733	5.87302	1.98783	2.95448	0.00313192	0.0118835	LBX1-AS1	processed_transcript	DiffExprLncRNA
ENSG00000226009.1	34.4661	-1.9266	0.636257	-3.02802	0.00246164	0.00962905	KCNIP2-AS1	antisense	DiffExprLncRNA
ENSG00000269609.5	368.544	-1.32878	0.247969	-5.35865	8.38465e-08	8.60477e-07	RPARP-AS1	processed_transcript	DiffExprLncRNA
ENSG00000229981.7	7.41027	6.28098	1.89732	3.31045	0.000931463	0.00414563	LINC01435	lincRNA	DiffExprLncRNA
ENSG00000277879.1	19.75	-2.40687	0.831418	-2.8949	0.00379285	0.0140203	AL391988.1	antisense	DiffExprLncRNA
ENSG00000177640.15	29.8011	1.9253	0.659953	2.91733	0.00353043	0.0131862	CASC2	antisense	DiffExprLncRNA
ENSG00000229272.1	131.745	7.40187	0.893936	8.28009	1.23086e-16	3.56022e-15	AL157788.1	antisense	DiffExprLncRNA
ENSG00000236303.3	16.7991	3.94417	1.08956	3.61997	0.000294639	0.00149945	LINC02646	lincRNA	DiffExprLncRNA
ENSG00000230098.1	7.30172	4.77481	1.8439	2.58951	0.00961125	0.0307224	TCERG1L-AS1	antisense	DiffExprLncRNA
ENSG00000189275.3	11.7856	5.47633	1.70713	3.20792	0.001337	0.00568851	LINC01164	lincRNA	DiffExprLncRNA
ENSG00000226900.1	64.0433	1.78056	0.461609	3.8573	0.000114649	0.000648367	AL451069.1	lincRNA	DiffExprLncRNA
ENSG00000226416.1	326.479	2.19637	0.297769	7.37608	1.6302e-13	3.56771e-12	MRPL23-AS1	antisense	DiffExprLncRNA
ENSG00000224513.2	3.92557	5.3649	2.18628	2.4539	0.0141317	0.0424761	AC109309.1	antisense	DiffExprLncRNA
ENSG00000254757.1	24.3687	8.00236	1.58729	5.04151	4.61864e-07	4.199e-06	AC127526.1	lincRNA	DiffExprLncRNA
ENSG00000254951.7	4.47816	5.56007	2.08879	2.66187	0.00777089	0.0257364	AC044810.2	sense_overlapping	DiffExprLncRNA
ENSG00000251381.7	730.838	2.70798	0.215416	12.571	3.04947e-36	3.4193e-34	LINC00958	lincRNA	DiffExprLncRNA
ENSG00000260196.1	278.328	-1.04358	0.283874	-3.67621	0.000236725	0.00123493	AC124798.1	antisense	DiffExprLncRNA
ENSG00000245573.8	57.6357	3.04785	0.543445	5.60839	2.0422e-08	2.32917e-07	BDNF-AS	processed_transcript	DiffExprLncRNA
ENSG00000183242.11	15.7319	-2.50478	0.910255	-2.75173	0.00592813	0.0204849	WT1-AS	bidirectional_promoter_lncRNA	DiffExprLncRNA
ENSG00000247675.6	24.1724	2.90959	0.778376	3.73802	0.000185473	0.000996958	LRP4-AS1	antisense	DiffExprLncRNA
ENSG00000255301.1	22.2995	-1.97923	0.739928	-2.67489	0.0074754	0.0248848	AP002893.1	antisense	DiffExprLncRNA
ENSG00000245571.6	57.9029	1.99612	0.48713	4.09772	4.17243e-05	0.000259321	FAM111A-DT	lincRNA	DiffExprLncRNA
ENSG00000256940.1	49.401	2.27062	0.548346	4.14085	3.46023e-05	0.0002188	AP001453.2	antisense	DiffExprLncRNA
ENSG00000229719.5	736.228	1.72302	0.215662	7.98947	1.35523e-15	3.56429e-14	MIR194-2HG	lincRNA	DiffExprLncRNA
ENSG00000245532.8	148631	1.77914	0.17293	10.2882	7.96301e-25	4.3668e-23	NEAT1	lincRNA	DiffExprLncRNA
ENSG00000251562.8	202763	1.30935	0.165148	7.92834	2.22099e-15	5.76337e-14	MALAT1	lincRNA	DiffExprLncRNA
ENSG00000255120.5	21.3132	5.33487	1.25052	4.26612	1.98901e-05	0.000132278	OVOL1-AS1	antisense	DiffExprLncRNA
ENSG00000255468.7	573.436	-2.72515	0.228532	-11.9246	8.81486e-33	8.14164e-31	AP001107.9	antisense	DiffExprLncRNA
ENSG00000254447.3	10.0917	6.72973	1.76366	3.81576	0.000135762	0.000753997	OR7E11P	processed_transcript	DiffExprLncRNA
ENSG00000255306.1	111.661	1.63443	0.392988	4.15899	3.19657e-05	0.000203592	AC004923.4	antisense	DiffExprLncRNA
ENSG00000255774.2	25.9188	-2.35515	0.707842	-3.32723	0.000877139	0.00393342	AP000439.2	lincRNA	DiffExprLncRNA
ENSG00000254682.1	83.8412	-1.75113	0.408581	-4.28589	1.82013e-05	0.00012179	AP002387.2	antisense	DiffExprLncRNA
ENSG00000254972.1	4.00105	5.39774	2.15326	2.50677	0.012184	0.0374946	AP003498.1	lincRNA	DiffExprLncRNA
ENSG00000285933.1	8.11082	6.41541	1.82885	3.50788	0.000451689	0.00218989	AP003498.2	lincRNA	DiffExprLncRNA
ENSG00000248671.7	130.657	2.64795	0.405587	6.52869	6.63483e-11	1.06091e-09	AP002495.1	processed_transcript	DiffExprLncRNA
ENSG00000215841.3	4.58988	5.59906	2.09885	2.66768	0.0076377	0.0253569	AP002761.1	antisense	DiffExprLncRNA
ENSG00000284722.2	3.85309	5.34033	2.17896	2.45086	0.0142516	0.0427283	AP003175.1	processed_transcript	DiffExprLncRNA
ENSG00000254814.1	4.146	5.44444	2.14661	2.5363	0.0112032	0.0350221	AP003031.1	antisense	DiffExprLncRNA
ENSG00000254632.1	32.8891	-1.84944	0.623036	-2.96843	0.00299322	0.0114321	AP003119.1	antisense	DiffExprLncRNA
ENSG00000261578.1	71.9947	-3.4114	0.487899	-6.99202	2.70963e-12	5.09167e-11	AP003119.3	sense_overlapping	DiffExprLncRNA
ENSG00000255929.5	5.02774	5.72499	2.02926	2.82123	0.00478406	0.0170773	AP000943.3	antisense	DiffExprLncRNA
ENSG00000254416.5	13.4913	3.57904	1.16052	3.08401	0.00204231	0.00820509	AP000924.1	lincRNA	DiffExprLncRNA
ENSG00000250303.3	101.133	2.52538	0.394615	6.39959	1.5579e-10	2.36348e-09	AP002884.1	lincRNA	DiffExprLncRNA
ENSG00000255435.6	33.0194	1.96569	0.629101	3.12461	0.00178042	0.00729492	AP001267.3	antisense	DiffExprLncRNA
ENSG00000255422.3	4.07353	5.42124	2.14345	2.52922	0.0114317	0.0355531	AP002954.1	antisense	DiffExprLncRNA
ENSG00000245248.7	228.256	-1.00081	0.273563	-3.65843	0.000253769	0.00131303	USP2-AS1	antisense	DiffExprLncRNA
ENSG00000254561.3	92.3836	5.27464	0.612179	8.61617	6.9229e-18	2.21135e-16	AP003393.1	antisense	DiffExprLncRNA
ENSG00000255248.8	42.6169	3.54718	0.649819	5.45871	4.79593e-08	5.1467e-07	MIR100HG	processed_transcript	DiffExprLncRNA
ENSG00000175773.13	15.9656	2.21271	0.893316	2.47697	0.0132504	0.0402446	AP002986.1	lincRNA	DiffExprLncRNA
ENSG00000249695.6	6.72162	4.64034	1.87218	2.47858	0.0131908	0.0401082	AC026369.1	antisense	DiffExprLncRNA
ENSG00000250899.3	339.555	-1.41209	0.254373	-5.55127	2.83596e-08	3.16427e-07	AC125807.2	lincRNA	DiffExprLncRNA
ENSG00000236908.2	8.07458	6.40954	1.82973	3.50301	0.000460039	0.00222447	AC005865.1	lincRNA	DiffExprLncRNA
ENSG00000256969.1	12.7372	3.15041	1.0784	2.92137	0.00348493	0.0130377	AC007207.2	lincRNA	DiffExprLncRNA
ENSG00000256654.3	75.1352	9.62818	1.49771	6.42862	1.28767e-10	1.97219e-09	AC005906.2	processed_transcript	DiffExprLncRNA
ENSG00000245648.1	190.103	6.33879	0.563537	11.2482	2.36283e-29	1.74946e-27	AC022075.1	antisense	DiffExprLncRNA
ENSG00000255745.1	124.525	2.71096	0.415069	6.53135	6.51793e-11	1.04406e-09	AC023796.1	lincRNA	DiffExprLncRNA
ENSG00000248100.2	10.2368	5.27488	1.73977	3.03195	0.00242981	0.0095218	AC087257.1	lincRNA	DiffExprLncRNA
ENSG00000247934.4	46.1489	2.69752	0.596477	4.52242	6.11378e-06	4.53531e-05	AC022364.1	antisense	DiffExprLncRNA
ENSG00000257176.2	36.463	2.21402	0.643939	3.43824	0.000585513	0.00275726	AC009318.1	antisense	DiffExprLncRNA
ENSG00000273680.1	19.7319	2.04177	0.827342	2.46787	0.0135919	0.0411213	AC009318.2	antisense	DiffExprLncRNA
ENSG00000245614.3	53.5489	-1.33845	0.500412	-2.67469	0.00747991	0.0248968	DDX11-AS1	antisense	DiffExprLncRNA
ENSG00000257261.5	483.664	1.90889	0.233064	8.19041	2.60344e-16	7.31298e-15	AC008014.1	lincRNA	DiffExprLncRNA
ENSG00000257496.1	9.81363	3.08092	1.22484	2.51536	0.0118911	0.0367427	AC025031.1	lincRNA	DiffExprLncRNA
ENSG00000275481.1	590.013	2.11302	0.257909	8.19291	2.54991e-16	7.17742e-15	AC025031.4	lincRNA	DiffExprLncRNA
ENSG00000272369.1	112.264	1.98355	0.407022	4.87333	1.09733e-06	9.34345e-06	AC008035.1	lincRNA	DiffExprLncRNA
ENSG00000268069.2	45.7052	3.32977	0.620923	5.36261	8.203e-08	8.43741e-07	AC004466.1	antisense	DiffExprLncRNA
ENSG00000276691.1	10.7866	3.2458	1.19114	2.72496	0.00643099	0.0219498	AC004466.3	antisense	DiffExprLncRNA
ENSG00000257985.1	20.2589	7.73618	1.61243	4.79784	1.60389e-06	1.32508e-05	AC004801.4	antisense	DiffExprLncRNA
ENSG00000257913.2	109.574	-1.92702	0.365082	-5.27831	1.30378e-07	1.3022e-06	DDN-AS1	antisense	DiffExprLncRNA
ENSG00000258057.5	24.3985	2.92042	0.776128	3.7628	0.000168019	0.000913413	BCDIN3D-AS1	antisense	DiffExprLncRNA
ENSG00000249641.2	37.2143	8.6134	1.54203	5.58577	2.32667e-08	2.63486e-07	HOXC13-AS	antisense	DiffExprLncRNA
ENSG00000250742.3	157.903	-2.97247	0.340731	-8.7238	2.69021e-18	8.92817e-17	LINC02381	lincRNA	DiffExprLncRNA
ENSG00000257303.1	16.5904	-2.21852	0.917364	-2.41836	0.0155906	0.0460415	AC073896.2	antisense	DiffExprLncRNA
ENSG00000276727.1	12.0117	-2.91346	1.07589	-2.70796	0.00676979	0.022931	AC137834.2	antisense	DiffExprLncRNA
ENSG00000257698.1	61.2691	1.13996	0.455486	2.50274	0.0123236	0.0378602	GIHCG	lincRNA	DiffExprLncRNA
ENSG00000197301.7	9.71198	3.08412	1.29465	2.38221	0.0172093	0.0499688	HMGA2-AS1	antisense	DiffExprLncRNA
ENSG00000251301.6	4.62311	5.60187	2.08403	2.688	0.0071881	0.0241319	LINC02384	lincRNA	DiffExprLncRNA
ENSG00000247131.5	9.76562	4.16308	1.41663	2.93873	0.00329563	0.0124217	AC025263.1	antisense	DiffExprLncRNA
ENSG00000258168.5	40.2926	1.48665	0.592869	2.50754	0.0121574	0.0374424	AC025569.1	antisense	DiffExprLncRNA
ENSG00000277247.1	7.11736	6.22343	1.90081	3.2741	0.00106	0.00463666	AC083809.1	antisense	DiffExprLncRNA
ENSG00000258077.2	16.7053	2.1371	0.865253	2.46991	0.0135146	0.0409374	AC078923.1	lincRNA	DiffExprLncRNA
ENSG00000258088.1	10.7779	3.25213	1.24215	2.61816	0.00884064	0.0287344	AC078820.1	lincRNA	DiffExprLncRNA
ENSG00000257839.1	89.9265	1.13699	0.392772	2.89478	0.0037942	0.0140215	AC011611.4	antisense	DiffExprLncRNA
ENSG00000245904.3	4.40268	5.53076	2.11649	2.61317	0.00897061	0.0290771	AC025164.1	antisense	DiffExprLncRNA
ENSG00000257345.2	255.719	-1.65482	0.271483	-6.09547	1.09113e-09	1.47691e-08	LINC02413	lincRNA	DiffExprLncRNA
ENSG00000258312.1	4.55064	5.58109	2.0812	2.68167	0.00732549	0.0244575	AC016152.1	lincRNA	DiffExprLncRNA
ENSG00000257817.1	33.8961	2.47365	0.649565	3.80816	0.000140003	0.000775338	AC026765.2	lincRNA	DiffExprLncRNA
ENSG00000257683.1	44.9993	4.57939	0.733685	6.24162	4.33052e-10	6.13591e-09	LINC02463	lincRNA	DiffExprLncRNA
ENSG00000255857.5	133.102	-1.20776	0.352598	-3.42531	0.000614109	0.00287256	PXN-AS1	antisense	DiffExprLncRNA
ENSG00000248008.2	255.68	1.04767	0.267236	3.92038	8.84109e-05	0.000513303	NRAV	antisense	DiffExprLncRNA
ENSG00000241388.5	463.15	-2.0936	0.232663	-8.99843	2.28976e-19	8.2854e-18	HNF1A-AS1	processed_transcript	DiffExprLncRNA
ENSG00000274292.1	68.5467	-1.39131	0.438078	-3.17595	0.00149348	0.0062585	AC084018.2	lincRNA	DiffExprLncRNA
ENSG00000255856.2	19.051	3.77519	1.02013	3.70068	0.00021502	0.00113606	AC069503.1	lincRNA	DiffExprLncRNA
ENSG00000249267.6	19.3861	6.21024	1.60953	3.85842	0.000114123	0.00064553	LINC00939	lincRNA	DiffExprLncRNA
ENSG00000275212.2	6.31699	4.54503	1.90266	2.38878	0.0169045	0.0492302	AC005186.1	lincRNA	DiffExprLncRNA
ENSG00000229558.2	4.87978	5.6795	2.05906	2.7583	0.00581032	0.0201674	SACS-AS1	lincRNA	DiffExprLncRNA
ENSG00000277151.1	66.4106	-1.16761	0.454566	-2.56862	0.0102104	0.0323792	AL138820.1	lincRNA	DiffExprLncRNA
ENSG00000274317.1	462.549	4.57668	0.284638	16.0789	3.58481e-58	9.76752e-56	LINC02334	lincRNA	DiffExprLncRNA
ENSG00000223685.5	60.6066	1.77388	0.481971	3.68047	0.000232804	0.00121634	LINC00571	lincRNA	DiffExprLncRNA
ENSG00000278390.4	28.336	2.09089	0.747295	2.79795	0.00514284	0.0181559	AL354696.2	antisense	DiffExprLncRNA
ENSG00000236778.7	79.6128	1.41839	0.411908	3.44346	0.000574316	0.00270921	INTS6-AS1	antisense	DiffExprLncRNA
ENSG00000231856.2	37.5579	1.39241	0.57942	2.40311	0.0162562	0.0475966	AL162377.1	antisense	DiffExprLncRNA
ENSG00000278238.1	35.261	2.63281	0.642673	4.09666	4.19151e-05	0.000260388	AL359513.1	lincRNA	DiffExprLncRNA
ENSG00000235660.2	17.1427	3.96161	1.04865	3.77781	0.000158217	0.000864954	LINC00345	lincRNA	DiffExprLncRNA
ENSG00000234377.7	3.96481	5.38582	2.16321	2.48974	0.0127837	0.0390667	RNF219-AS1	antisense	DiffExprLncRNA
ENSG00000215417.12	596.052	-1.30429	0.260679	-5.00342	5.63219e-07	5.02983e-06	MIR17HG	processed_transcript	DiffExprLncRNA
ENSG00000228889.6	95.3674	1.87655	0.388703	4.82773	1.38096e-06	1.15669e-05	UBAC2-AS1	lincRNA	DiffExprLncRNA
ENSG00000274605.1	143.584	1.05343	0.321534	3.27627	0.00105188	0.00460782	AL355338.1	lincRNA	DiffExprLncRNA
ENSG00000275880.1	38.0492	2.9448	0.646681	4.55371	5.27083e-06	3.96178e-05	AL139385.1	antisense	DiffExprLncRNA
ENSG00000255874.2	55.6307	2.86221	0.532131	5.37876	7.49992e-08	7.78478e-07	LINC00346	lincRNA	DiffExprLncRNA
ENSG00000274922.1	89.3008	1.8568	0.404347	4.59208	4.38845e-06	3.35312e-05	AL139384.1	lincRNA	DiffExprLncRNA
ENSG00000233695.2	637.502	7.01086	0.39341	17.8207	4.87966e-71	2.29235e-68	GAS6-AS1	antisense	DiffExprLncRNA
ENSG00000274827.4	9.83221	5.21421	1.75237	2.97551	0.00292499	0.011195	LINC01297	lincRNA	DiffExprLncRNA
ENSG00000251002.7	3.78062	5.31545	2.18654	2.43099	0.0150578	0.044683	AC244502.1	processed_transcript	DiffExprLncRNA
ENSG00000258458.6	53.289	2.29402	0.50946	4.50284	6.70521e-06	4.92577e-05	AL160314.2	processed_transcript	DiffExprLncRNA
ENSG00000258457.5	225.571	2.30474	0.29235	7.88349	3.18355e-15	8.10676e-14	AL132780.2	antisense	DiffExprLncRNA
ENSG00000258727.1	126.045	1.20376	0.343456	3.50485	0.000456868	0.00221224	AL135999.1	antisense	DiffExprLncRNA
ENSG00000258744.1	24.9298	2.22152	0.731022	3.03892	0.00237425	0.00933494	AL132800.1	antisense	DiffExprLncRNA
ENSG00000258028.2	4.36644	5.51984	2.11183	2.61378	0.00895475	0.0290499	AL135878.1	lincRNA	DiffExprLncRNA
ENSG00000257636.6	5.10022	5.74381	2.03182	2.82693	0.00469971	0.0168402	G2E3-AS1	antisense	DiffExprLncRNA
ENSG00000258474.1	74.0195	-1.99994	0.447479	-4.46934	7.84604e-06	5.69324e-05	LINC02313	lincRNA	DiffExprLncRNA
ENSG00000258897.1	28.1048	3.66121	0.802053	4.5648	4.99965e-06	3.77461e-05	EGLN3-AS1	antisense	DiffExprLncRNA
ENSG00000258738.1	304.727	-1.01325	0.266204	-3.80629	0.000141068	0.000780226	AL121603.2	antisense	DiffExprLncRNA
ENSG00000257585.1	5.76152	5.92117	1.96593	3.01189	0.00259628	0.0100903	LINC00609	lincRNA	DiffExprLncRNA
ENSG00000259091.1	3.70814	5.29009	2.20913	2.39465	0.0166363	0.0485684	LINC00517	antisense	DiffExprLncRNA
ENSG00000259048.1	5.42937	5.83221	2.0244	2.88096	0.0039646	0.0145369	AL392023.2	antisense	DiffExprLncRNA
ENSG00000259070.6	40.3607	3.58629	0.65852	5.44598	5.15214e-08	5.49864e-07	LINC00639	lincRNA	DiffExprLncRNA
ENSG00000258616.5	115.282	10.2434	1.49953	6.83107	8.42855e-12	1.49708e-10	LINC02303	lincRNA	DiffExprLncRNA
ENSG00000258377.1	24.9594	-2.97752	0.860986	-3.45827	0.000543654	0.0025811	AL139099.1	antisense	DiffExprLncRNA
ENSG00000258535.1	6.23863	6.03602	1.93093	3.12596	0.00177223	0.00727117	AL079307.1	sense_overlapping	DiffExprLncRNA
ENSG00000258592.1	19.1871	6.19499	1.62336	3.81615	0.000135551	0.00075318	AL391152.1	lincRNA	DiffExprLncRNA
ENSG00000258583.6	5.42937	5.83221	2.0244	2.88096	0.0039646	0.0145369	LINC01500	lincRNA	DiffExprLncRNA
ENSG00000276116.2	58.748	1.38467	0.467483	2.96197	0.0030568	0.0116488	FUT8-AS1	antisense	DiffExprLncRNA
ENSG00000258561.1	24.9628	2.32397	0.75922	3.06099	0.00220604	0.00875825	AL359232.1	lincRNA	DiffExprLncRNA
ENSG00000274818.1	20.135	2.45439	0.815399	3.01004	0.00261213	0.0101429	AC004825.2	lincRNA	DiffExprLncRNA
ENSG00000285966.1	14.1802	3.31913	1.04963	3.16218	0.00156592	0.00652193	AC007686.4	lincRNA	DiffExprLncRNA
ENSG00000258602.1	335.913	7.53017	0.597157	12.61	1.85915e-36	2.12842e-34	LINC01629	lincRNA	DiffExprLncRNA
ENSG00000284959.1	14.4671	4.13924	1.1733	3.52785	0.000418948	0.00205159	AC007262.2	antisense	DiffExprLncRNA
ENSG00000258920.1	71.6977	1.41192	0.445143	3.17183	0.00151483	0.0063353	FOXN3-AS1	antisense	DiffExprLncRNA
ENSG00000259163.1	10.9372	6.84717	1.73794	3.93983	8.15394e-05	0.000477068	AL096869.2	antisense	DiffExprLncRNA
ENSG00000258572.1	11.4409	2.66473	1.11716	2.38528	0.0170659	0.0496331	AL133467.1	lincRNA	DiffExprLncRNA
ENSG00000247092.6	620.424	-1.51013	0.250551	-6.02723	1.66798e-09	2.19765e-08	SNHG10	antisense	DiffExprLncRNA
ENSG00000258702.2	4.07353	5.42124	2.14345	2.52922	0.0114317	0.0355531	AL137786.1	processed_transcript	DiffExprLncRNA
ENSG00000258383.1	9.87129	6.69761	1.77124	3.78131	0.000156003	0.000854566	AL132819.1	lincRNA	DiffExprLncRNA
ENSG00000225746.11	11.2057	4.3634	1.3947	3.12855	0.00175669	0.00722266	MEG8	lincRNA	DiffExprLncRNA
ENSG00000258498.8	16.5176	7.44293	1.64675	4.51977	6.19074e-06	4.58741e-05	DIO3OS	lincRNA	DiffExprLncRNA
ENSG00000278626.1	73.393	9.59239	1.50356	6.37979	1.77326e-10	2.6635e-09	AC023310.4	lincRNA	DiffExprLncRNA
ENSG00000260409.1	17.9724	4.0268	1.07094	3.76007	0.000169866	0.00092106	AC012414.5	lincRNA	DiffExprLncRNA
ENSG00000247765.2	18.6465	5.13328	1.25507	4.09002	4.31337e-05	0.000267288	AC068446.2	lincRNA	DiffExprLncRNA
ENSG00000274253.4	23.4874	-1.74004	0.716205	-2.42953	0.0151186	0.0448438	AC138649.1	sense_overlapping	DiffExprLncRNA
ENSG00000256802.2	29.1676	1.89418	0.659571	2.87183	0.00408101	0.0149032	AC022613.1	antisense	DiffExprLncRNA
ENSG00000225930.4	228.766	1.93581	0.301416	6.4224	1.34139e-10	2.0487e-09	LINC02249	lincRNA	DiffExprLncRNA
ENSG00000270055.1	61.0875	-1.78134	0.486497	-3.66157	0.000250677	0.00129827	AC127502.2	sense_intronic	DiffExprLncRNA
ENSG00000248508.7	82.8361	2.27208	0.42144	5.39122	6.99796e-08	7.2999e-07	SRP14-AS1	bidirectional_promoter_lncRNA	DiffExprLncRNA
ENSG00000276121.1	12.1395	3.42843	1.20298	2.84994	0.00437279	0.0158102	AC122108.2	lincRNA	DiffExprLncRNA
ENSG00000259418.1	10.7863	6.82346	1.76635	3.86304	0.000111986	0.000633969	AC091117.2	antisense	DiffExprLncRNA
ENSG00000259306.2	27.2294	-1.57597	0.661044	-2.38407	0.0171223	0.0497634	AC020891.2	lincRNA	DiffExprLncRNA
ENSG00000259178.1	59.4327	6.83202	1.11112	6.14877	7.80864e-10	1.07891e-08	AC023906.2	lincRNA	DiffExprLncRNA
ENSG00000277245.1	9.31586	5.13157	1.78771	2.87046	0.00409872	0.0149562	AC084782.3	antisense	DiffExprLncRNA
ENSG00000276772.1	12.8153	-3.301	1.0801	-3.05619	0.0022417	0.00888562	AC025271.4	lincRNA	DiffExprLncRNA
ENSG00000259370.2	89.886	2.01764	0.41763	4.83116	1.35737e-06	1.13833e-05	AC103740.1	antisense	DiffExprLncRNA
ENSG00000274383.1	55.372	2.08148	0.495997	4.19655	2.71017e-05	0.000175277	AC103691.1	antisense	DiffExprLncRNA
ENSG00000261634.3	6.86069	6.17061	1.91251	3.22644	0.00125342	0.00537064	AC026992.2	antisense	DiffExprLncRNA
ENSG00000261423.1	82.3019	1.23938	0.412215	3.00664	0.00264154	0.0102396	TMEM202-AS1	lincRNA	DiffExprLncRNA
ENSG00000261801.5	8.51545	6.48677	1.81202	3.57986	0.000343783	0.00171841	LOXL1-AS1	antisense	DiffExprLncRNA
ENSG00000260274.1	81.0521	1.24766	0.403651	3.09093	0.0019953	0.00803636	AC068338.2	lincRNA	DiffExprLncRNA
ENSG00000246877.1	65.965	2.80518	0.485315	5.78013	7.46443e-09	9.03926e-08	DNM1P35	antisense	DiffExprLncRNA
ENSG00000260288.3	8.76628	5.04215	1.79651	2.80664	0.00500619	0.0177355	AC019294.2	processed_transcript	DiffExprLncRNA
ENSG00000259362.2	93.0873	5.46169	0.626079	8.72365	2.69387e-18	8.92941e-17	AC046168.1	lincRNA	DiffExprLncRNA
ENSG00000259642.2	135.118	1.15649	0.342255	3.37903	0.000727434	0.00334804	ST20-AS1	antisense	DiffExprLncRNA
ENSG00000259495.2	8.15595	4.93437	1.8147	2.71912	0.00654563	0.0222741	AC016705.2	lincRNA	DiffExprLncRNA
ENSG00000259407.1	56.7842	2.302	0.502823	4.57816	4.6909e-06	3.56323e-05	AC021739.2	antisense	DiffExprLncRNA
ENSG00000259416.2	45.4807	1.53635	0.546054	2.81354	0.00489985	0.0174313	AC021739.3	antisense	DiffExprLncRNA
ENSG00000259291.2	166.682	3.06522	0.340067	9.01359	1.99427e-19	7.24503e-18	ZNF710-AS1	antisense	DiffExprLncRNA
ENSG00000261054.1	61.3199	1.94192	0.480006	4.04562	5.21839e-05	0.00031816	AC036108.2	antisense	DiffExprLncRNA
ENSG00000261616.1	30.2394	1.66858	0.639539	2.60904	0.00907976	0.0293426	AC036108.3	antisense	DiffExprLncRNA
ENSG00000260260.1	481.337	-1.15681	0.291388	-3.97001	7.18702e-05	0.00042469	SNHG19	lincRNA	DiffExprLncRNA
ENSG00000260778.5	60.9751	1.59023	0.465496	3.4162	0.000635007	0.00295964	AC009065.4	lincRNA	DiffExprLncRNA
ENSG00000269937.1	154.613	1.25882	0.337498	3.72985	0.000191594	0.00102521	AC093525.7	antisense	DiffExprLncRNA
ENSG00000205913.6	300.171	2.68191	0.277557	9.66256	4.34875e-22	1.97484e-20	SRRM2-AS1	antisense	DiffExprLncRNA
ENSG00000263280.1	9.83526	3.55136	1.28756	2.75822	0.00581165	0.0201694	AC003965.1	lincRNA	DiffExprLncRNA
ENSG00000261617.1	8.44285	4.97713	1.83719	2.70909	0.00674673	0.0228614	LINC02177	lincRNA	DiffExprLncRNA
ENSG00000277369.1	129.66	1.33587	0.373185	3.57966	0.000344047	0.00171941	AC010654.1	lincRNA	DiffExprLncRNA
ENSG00000260378.1	3.85309	5.34033	2.17896	2.45086	0.0142516	0.0427283	AC109597.1	antisense	DiffExprLncRNA
ENSG00000262732.1	5.834	5.93763	1.96997	3.01408	0.00257762	0.0100332	AC010401.1	antisense	DiffExprLncRNA
ENSG00000260009.1	49.2568	2.81006	0.619415	4.53663	5.71604e-06	4.26698e-05	LINC02130	lincRNA	DiffExprLncRNA
ENSG00000259929.5	4.77107	5.64987	2.05488	2.74949	0.00596882	0.0205942	AC010601.1	lincRNA	DiffExprLncRNA
ENSG00000261357.1	112.305	4.11498	1.18791	3.46405	0.00053211	0.00253203	AC099518.2	lincRNA	DiffExprLncRNA
ENSG00000260072.1	6.27487	6.04363	1.93208	3.12805	0.00175971	0.00722853	AC008938.1	lincRNA	DiffExprLncRNA
ENSG00000262155.1	22.8922	2.07461	0.739122	2.80686	0.00500277	0.017728	LINC02175	lincRNA	DiffExprLncRNA
ENSG00000260034.1	6.89993	6.18249	1.88746	3.27555	0.00105456	0.00461807	LCMT1-AS2	antisense	DiffExprLncRNA
ENSG00000275441.1	20.5532	-2.03312	0.769383	-2.64253	0.00822886	0.0270004	AC020765.2	antisense	DiffExprLncRNA
ENSG00000277999.1	105.599	1.37261	0.36688	3.74132	0.000183057	0.000985138	AC009093.6	lincRNA	DiffExprLncRNA
ENSG00000198106.8	31.6109	2.03794	0.644336	3.16285	0.00156231	0.0065079	AC025279.1	processed_transcript	DiffExprLncRNA
ENSG00000260083.1	89.9887	-1.034	0.385091	-2.68509	0.00725109	0.0242715	MIR762HG	antisense	DiffExprLncRNA
ENSG00000260852.1	470.312	-1.21928	0.233045	-5.23194	1.67743e-07	1.64111e-06	FBXL19-AS1	antisense	DiffExprLncRNA
ENSG00000261359.2	38.9175	4.15795	0.727604	5.71458	1.09976e-08	1.29783e-07	PYCARD-AS1	antisense	DiffExprLncRNA
ENSG00000276867.1	51.3918	-1.18462	0.491999	-2.40777	0.0160502	0.0471048	AC074050.4	lincRNA	DiffExprLncRNA
ENSG00000261231.6	6.75786	4.64761	1.87274	2.48172	0.013075	0.0398138	LINC02133	lincRNA	DiffExprLncRNA
ENSG00000260605.1	18.4026	-2.61319	0.873281	-2.99238	0.0027681	0.0106755	AC027688.1	lincRNA	DiffExprLncRNA
ENSG00000260963.1	27.9745	-2.82066	0.74265	-3.7981	0.000145807	0.000803559	AC026462.3	lincRNA	DiffExprLncRNA
ENSG00000261804.1	142.894	10.5538	1.48285	7.11726	1.10093e-12	2.16584e-11	AC007342.4	lincRNA	DiffExprLncRNA
ENSG00000262714.1	182.629	10.9078	1.47982	7.37102	1.69321e-13	3.6908e-12	AC007342.5	lincRNA	DiffExprLncRNA
ENSG00000260823.1	4.80731	5.65979	2.0539	2.75562	0.00585801	0.0202915	AC026461.3	lincRNA	DiffExprLncRNA
ENSG00000276663.1	13.568	3.25359	1.11877	2.90819	0.00363533	0.0135243	AC009090.3	antisense	DiffExprLncRNA
ENSG00000276166.1	17.5262	-2.10304	0.836328	-2.51461	0.0119163	0.0368039	AC092118.2	antisense	DiffExprLncRNA
ENSG00000187185.4	46.9027	1.82646	0.524745	3.48066	0.000500183	0.00239854	AC092118.1	lincRNA	DiffExprLncRNA
ENSG00000261807.2	4.3302	5.50888	2.11045	2.61029	0.00904663	0.029247	LINC02141	lincRNA	DiffExprLncRNA
ENSG00000275383.1	21.5274	2.0735	0.761034	2.72459	0.0064382	0.0219716	AC126773.4	lincRNA	DiffExprLncRNA
ENSG00000262136.1	55.7313	1.35199	0.492492	2.74521	0.0060473	0.0208271	AC092115.3	antisense	DiffExprLncRNA
ENSG00000247228.2	26.1073	2.19981	0.718152	3.06315	0.00219023	0.00871455	AC009060.1	antisense	DiffExprLncRNA
ENSG00000261348.1	12.2206	7.00623	1.71215	4.09205	4.27568e-05	0.000265073	LINC02136	lincRNA	DiffExprLncRNA
ENSG00000260664.2	5.87324	5.95176	1.95628	3.04239	0.00234711	0.00924292	AC004158.1	lincRNA	DiffExprLncRNA
ENSG00000261170.1	17.3679	2.49983	0.960541	2.60253	0.0092539	0.0297512	AC009053.3	antisense	DiffExprLncRNA
ENSG00000259867.5	47.5698	3.03958	0.580919	5.23237	1.67352e-07	1.63787e-06	AC105411.1	antisense	DiffExprLncRNA
ENSG00000278214.1	34.7593	8.51604	1.5475	5.50309	3.73187e-08	4.07381e-07	LINC02139	lincRNA	DiffExprLncRNA
ENSG00000261273.1	13.1782	2.91648	1.04942	2.77913	0.0054505	0.0191181	AC138512.1	lincRNA	DiffExprLncRNA
ENSG00000224888.4	18.9221	3.78294	1.01671	3.72076	0.000198627	0.00105972	AC138028.2	antisense	DiffExprLncRNA
ENSG00000205015.1	9.07104	6.58284	1.84371	3.57043	0.000356399	0.00177626	LINC02138	lincRNA	DiffExprLncRNA
ENSG00000261373.1	29.5446	4.45249	0.877279	5.07534	3.868e-07	3.5604e-06	VPS9D1-AS1	antisense	DiffExprLncRNA
ENSG00000186594.14	653.655	1.58944	0.212918	7.46505	8.3265e-14	1.86726e-12	MIR22HG	lincRNA	DiffExprLncRNA
ENSG00000262445.3	149.934	1.99957	0.361079	5.53776	3.06358e-08	3.40282e-07	AC099684.2	antisense	DiffExprLncRNA
ENSG00000228133.2	30.4241	3.01863	0.714991	4.22191	2.42236e-05	0.00015824	AC099684.1	antisense	DiffExprLncRNA
ENSG00000262903.1	188.769	2.85478	0.331591	8.60934	7.34835e-18	2.3445e-16	AC027796.4	antisense	DiffExprLncRNA
ENSG00000178977.3	244.671	4.42913	0.344508	12.8564	7.91883e-38	9.85226e-36	LINC00324	lincRNA	DiffExprLncRNA
ENSG00000273018.6	9.79881	6.68792	1.76964	3.77926	0.000157298	0.000860794	FAM106A	processed_transcript	DiffExprLncRNA
ENSG00000276399.1	5.28441	5.79639	2.00641	2.88894	0.00386543	0.0142326	AC209154.1	lincRNA	DiffExprLncRNA
ENSG00000260777.1	5.13946	5.75996	2.02162	2.84918	0.00438321	0.0158424	AC061975.1	lincRNA	DiffExprLncRNA
ENSG00000265073.1	27.9491	2.06768	0.71803	2.87965	0.00398114	0.0145897	AC010761.3	antisense	DiffExprLncRNA
ENSG00000266120.1	7.41328	6.28535	1.86147	3.37655	0.000734	0.00337313	AC104984.4	antisense	DiffExprLncRNA
ENSG00000214719.12	48.7361	-1.27512	0.520148	-2.45145	0.0142282	0.0427237	AC005562.1	processed_transcript	DiffExprLncRNA
ENSG00000266947.1	18.5135	3.20793	0.908696	3.53025	0.000415162	0.00203525	AC022916.1	antisense	DiffExprLncRNA
ENSG00000275944.1	89.5669	1.18808	0.389999	3.04636	0.00231628	0.00913469	AC244100.3	antisense	DiffExprLncRNA
ENSG00000277969.1	192.311	-1.85766	0.297	-6.25473	3.98195e-10	5.67745e-09	AC006449.6	lincRNA	DiffExprLncRNA
ENSG00000266469.1	28.1673	3.01046	0.758092	3.9711	7.15424e-05	0.000423028	AC005288.1	antisense	DiffExprLncRNA
ENSG00000265799.1	36.8612	4.07484	0.735836	5.5377	3.06475e-08	3.40282e-07	AC090844.3	lincRNA	DiffExprLncRNA
ENSG00000265666.1	62.2572	1.79598	0.492345	3.64781	0.000264487	0.00136254	RARA-AS1	antisense	DiffExprLncRNA
ENSG00000266208.1	726.128	2.07155	0.232289	8.91801	4.74734e-19	1.6712e-17	AC080112.1	antisense	DiffExprLncRNA
ENSG00000197291.8	61.3102	-1.33226	0.457957	-2.90913	0.00362435	0.0134945	RAMP2-AS1	lincRNA	DiffExprLncRNA
ENSG00000267080.5	696.259	1.55229	0.218228	7.11314	1.13431e-12	2.22671e-11	ASB16-AS1	antisense	DiffExprLncRNA
ENSG00000224505.2	86.6618	2.65115	0.475767	5.57238	2.51282e-08	2.8292e-07	AC138150.1	antisense	DiffExprLncRNA
ENSG00000267288.2	22.1708	-2.17821	0.778102	-2.79939	0.00511988	0.0180865	AC138150.2	antisense	DiffExprLncRNA
ENSG00000267278.5	20.0991	1.95246	0.783388	2.49233	0.0126909	0.0388397	MAP3K14-AS1	antisense	DiffExprLncRNA
ENSG00000264920.1	127.414	1.85396	0.345357	5.36822	7.95162e-08	8.21604e-07	AC018521.5	processed_transcript	DiffExprLncRNA
ENSG00000234494.7	84.3903	1.87215	0.413896	4.52323	6.09026e-06	4.5191e-05	SP2-AS1	antisense	DiffExprLncRNA
ENSG00000244649.4	432.805	9.12309	0.866976	10.5229	6.7761e-26	4.06671e-24	LINC02086	lincRNA	DiffExprLncRNA
ENSG00000249906.1	30.0425	5.24141	1.0497	4.99324	5.93753e-07	5.28175e-06	AC006487.1	antisense	DiffExprLncRNA
ENSG00000246640.1	8.14405	6.41732	1.86247	3.44559	0.000569808	0.00269027	PICART1	lincRNA	DiffExprLncRNA
ENSG00000275025.1	9.18901	-3.14633	1.2531	-2.51084	0.0120445	0.0371367	AC002401.3	antisense	DiffExprLncRNA
ENSG00000250282.1	12.7512	-2.72377	1.02715	-2.65179	0.0080067	0.0263859	AC002401.2	antisense	DiffExprLncRNA
ENSG00000250286.1	187.786	2.20479	0.320875	6.87116	6.36813e-12	1.14153e-10	AC021491.2	processed_transcript	DiffExprLncRNA
ENSG00000247011.2	95.8692	1.36613	0.38352	3.56208	0.000367927	0.00182903	AC005920.1	lincRNA	DiffExprLncRNA
ENSG00000263096.1	22.3968	3.50545	0.876232	4.0006	6.31813e-05	0.000378102	AC007638.2	antisense	DiffExprLncRNA
ENSG00000264672.5	22.5357	7.89045	1.59641	4.94262	7.70805e-07	6.72283e-06	SEPT4-AS1	antisense	DiffExprLncRNA
ENSG00000224738.1	24.4794	-1.73268	0.699551	-2.47685	0.0132548	0.0402533	AC099850.1	antisense	DiffExprLncRNA
ENSG00000273702.1	75.2867	1.02661	0.423558	2.42377	0.0153604	0.0454671	AC091271.1	lincRNA	DiffExprLncRNA
ENSG00000259349.1	56.6108	2.65842	0.51815	5.13061	2.88804e-07	2.71066e-06	AC011921.1	antisense	DiffExprLncRNA
ENSG00000267280.5	297.072	-1.88663	0.261359	-7.21853	5.25517e-13	1.08393e-11	TBX2-AS1	antisense	DiffExprLncRNA
ENSG00000187013.4	30.3244	2.28848	0.661852	3.45768	0.000544843	0.00258539	C17orf82	lincRNA	DiffExprLncRNA
ENSG00000263489.1	3.88933	5.35264	2.18051	2.45476	0.0140978	0.0424025	AC127029.2	lincRNA	DiffExprLncRNA
ENSG00000266402.3	48.0381	-1.86524	0.522149	-3.57223	0.000353953	0.00176501	SNHG25	lincRNA	DiffExprLncRNA
ENSG00000278730.1	1366.79	1.17473	0.18828	6.23928	4.3959e-10	6.22531e-09	AC005332.6	lincRNA	DiffExprLncRNA
ENSG00000274561.1	119.438	1.34082	0.386572	3.4685	0.000523375	0.00249482	AC005332.3	lincRNA	DiffExprLncRNA
ENSG00000267250.1	8.62116	6.49966	1.84016	3.53213	0.000412233	0.00202126	AC011591.1	lincRNA	DiffExprLncRNA
ENSG00000231749.3	8.25577	6.43872	1.83424	3.5103	0.000447607	0.00217224	ABCA9-AS1	antisense	DiffExprLncRNA
ENSG00000277728.1	417.037	5.19171	0.318479	16.3016	9.61487e-60	2.72892e-57	AC097641.2	antisense	DiffExprLncRNA
ENSG00000177338.13	165.115	9.31868	1.46795	6.34809	2.18007e-10	3.21431e-09	LINC00469	lincRNA	DiffExprLncRNA
ENSG00000263843.1	100.737	-1.35822	0.419182	-3.24016	0.00119464	0.00515198	AC022211.2	antisense	DiffExprLncRNA
ENSG00000265342.1	16.277	3.00857	1.02419	2.93752	0.00330853	0.0124652	AC011933.3	antisense	DiffExprLncRNA
ENSG00000267128.1	346.411	5.72028	0.377903	15.1369	9.24589e-52	1.95289e-49	RNF157-AS1	antisense	DiffExprLncRNA
ENSG00000267123.6	100.127	1.06376	0.393901	2.70058	0.00692192	0.0234026	SCAT1	lincRNA	DiffExprLncRNA
ENSG00000265096.1	292.186	2.14331	0.274091	7.8197	5.29485e-15	1.3056e-13	C1QTNF1-AS1	antisense	DiffExprLncRNA
ENSG00000267719.1	20.5548	7.75824	1.61004	4.81866	1.44528e-06	1.20464e-05	LINC02078	lincRNA	DiffExprLncRNA
ENSG00000261978.1	17.6239	-3.09978	0.962778	-3.21962	0.00128362	0.00548107	AC116025.1	antisense	DiffExprLncRNA
ENSG00000261924.1	219.357	11.174	1.46969	7.60296	2.89443e-14	6.72906e-13	AC127496.1	antisense	DiffExprLncRNA
ENSG00000275966.1	23.953	-2.04082	0.735689	-2.77403	0.00553669	0.019388	AC110285.6	lincRNA	DiffExprLncRNA
ENSG00000262877.4	113.752	-1.51339	0.360329	-4.20003	2.66881e-05	0.000172889	AC110285.2	lincRNA	DiffExprLncRNA
ENSG00000263745.6	4.3302	5.50888	2.11045	2.61029	0.00904663	0.029247	AP005230.1	lincRNA	DiffExprLncRNA
ENSG00000265399.1	14.3385	2.58801	1.0304	2.51164	0.012017	0.0370644	AP005329.2	antisense	DiffExprLncRNA
ENSG00000264575.1	223.801	-1.74054	0.301733	-5.76849	7.99829e-09	9.64717e-08	LINC00526	lincRNA	DiffExprLncRNA
ENSG00000267199.1	81.202	1.39507	0.444213	3.14055	0.00168632	0.00696804	AP001029.2	antisense	DiffExprLncRNA
ENSG00000283294.1	161.27	3.26144	0.408409	7.98571	1.3972e-15	3.67112e-14	AP005212.4	processed_transcript	DiffExprLncRNA
ENSG00000260372.6	5.35689	5.81433	2.01093	2.89137	0.00383563	0.0141401	AQP4-AS1	antisense	DiffExprLncRNA
ENSG00000285095.1	4.10977	5.43287	2.14332	2.53479	0.0112516	0.035125	AC025887.2	antisense	DiffExprLncRNA
ENSG00000228835.1	157.299	-1.17094	0.310075	-3.77632	0.000159163	0.000869456	AC012123.1	antisense	DiffExprLncRNA
ENSG00000267374.1	263.175	-1.23228	0.26896	-4.58165	4.61329e-06	3.50623e-05	AC016205.1	lincRNA	DiffExprLncRNA
ENSG00000227115.7	8.18618	4.93115	1.84422	2.67384	0.00749879	0.0249535	LINC01630	lincRNA	DiffExprLncRNA
ENSG00000267257.1	11.5291	3.34459	1.15638	2.89229	0.00382445	0.0141141	AC105105.1	antisense	DiffExprLncRNA
ENSG00000266304.1	92.6105	1.58537	0.434879	3.64553	0.000266842	0.00137243	LIVAR	lincRNA	DiffExprLncRNA
ENSG00000260457.2	4.9885	5.70898	2.08929	2.73249	0.00628567	0.0215347	AC027458.1	lincRNA	DiffExprLncRNA
ENSG00000275178.1	4.14901	5.45285	2.14832	2.53819	0.0111426	0.0348648	AC018529.1	antisense	DiffExprLncRNA
ENSG00000282393.1	45.5579	1.96004	0.556616	3.52135	0.000429357	0.00209354	AC016588.2	lincRNA	DiffExprLncRNA
ENSG00000267751.5	66.0116	-2.09331	0.498606	-4.19833	2.68894e-05	0.000174027	AC009005.1	antisense	DiffExprLncRNA
ENSG00000267530.2	67.5626	-1.43309	0.504361	-2.8414	0.00449153	0.0161772	LINC01836	lincRNA	DiffExprLncRNA
ENSG00000267317.2	211.461	1.1979	0.294436	4.06846	4.7324e-05	0.000291464	AC027307.2	antisense	DiffExprLncRNA
ENSG00000267073.1	23.7156	2.49428	0.858712	2.90467	0.00367638	0.0136546	AC005256.1	lincRNA	DiffExprLncRNA
ENSG00000267551.3	40.1976	7.27305	1.52808	4.75961	1.93964e-06	1.57712e-05	AC005264.1	antisense	DiffExprLncRNA
ENSG00000267106.6	160.484	2.36747	0.3405	6.95293	3.57769e-12	6.61338e-11	ZNF561-AS1	processed_transcript	DiffExprLncRNA
ENSG00000214049.7	191.859	2.68805	0.341072	7.88118	3.24305e-15	8.25056e-14	UCA1	lincRNA	DiffExprLncRNA
ENSG00000269439.5	122.082	-1.29855	0.354037	-3.66784	0.000244608	0.00126973	AC010618.4	lincRNA	DiffExprLncRNA
ENSG00000266904.5	77.5671	3.02941	0.538436	5.62632	1.84096e-08	2.11025e-07	LINC00663	lincRNA	DiffExprLncRNA
ENSG00000179066.8	9.11304	4.047	1.4657	2.76113	0.00576014	0.0200289	AC020907.1	lincRNA	DiffExprLncRNA
ENSG00000267152.1	49.7061	-1.84063	0.5316	-3.46244	0.00053531	0.00254459	AC093227.1	lincRNA	DiffExprLncRNA
ENSG00000267107.7	13.0965	5.63547	1.69108	3.33248	0.000860758	0.00387161	PCAT19	lincRNA	DiffExprLncRNA
ENSG00000285128.1	17.6654	-2.02659	0.849417	-2.38587	0.017039	0.049574	AC092306.1	lincRNA	DiffExprLncRNA
ENSG00000268001.1	30.7167	-1.99306	0.637511	-3.12631	0.00177013	0.00726475	CARD8-AS1	antisense	DiffExprLncRNA
ENSG00000268108.1	163.192	7.71334	0.889641	8.67018	4.31443e-18	1.40448e-16	AC008687.2	antisense	DiffExprLncRNA
ENSG00000268287.1	164.26	8.30817	1.06308	7.81515	5.48968e-15	1.35119e-13	AC008687.3	lincRNA	DiffExprLncRNA
ENSG00000267984.1	40.2801	-2.01731	0.673921	-2.99339	0.00275895	0.0106417	AC008750.4	antisense	DiffExprLncRNA
ENSG00000269834.5	134.5	1.64624	0.343637	4.79062	1.66263e-06	1.36822e-05	ZNF528-AS1	processed_transcript	DiffExprLncRNA
ENSG00000267577.1	9.10428	6.58497	1.79632	3.66582	0.00024655	0.0012786	AC010327.3	antisense	DiffExprLncRNA
ENSG00000276449.1	47.705	-1.44394	0.53495	-2.69921	0.00695035	0.0234783	AC004076.2	antisense	DiffExprLncRNA
ENSG00000283103.2	120.663	-1.18765	0.345016	-3.44232	0.000576758	0.00271932	AC010642.2	antisense	DiffExprLncRNA
ENSG00000232098.3	514.98	1.00279	0.243463	4.11885	3.80774e-05	0.000238614	AC012313.1	lincRNA	DiffExprLncRNA
ENSG00000267858.5	242.688	1.74567	0.274126	6.36811	1.91375e-10	2.8572e-09	MZF1-AS1	antisense	DiffExprLncRNA
ENSG00000234684.6	496.489	1.32399	0.246696	5.36689	8.01041e-08	8.26428e-07	SDCBP2-AS1	antisense	DiffExprLncRNA
ENSG00000229728.1	43.396	3.15143	0.606859	5.19302	2.06908e-07	1.99491e-06	AL136531.1	antisense	DiffExprLncRNA
ENSG00000276649.1	12.0394	6.98664	1.71389	4.07648	4.57223e-05	0.000282237	AL117335.1	antisense	DiffExprLncRNA
ENSG00000277287.1	569.489	3.60776	0.249488	14.4607	2.1465e-47	3.82259e-45	AL109976.1	lincRNA	DiffExprLncRNA
ENSG00000229539.1	144.143	1.18243	0.324218	3.64703	0.00026529	0.0013657	AL353194.1	antisense	DiffExprLncRNA
ENSG00000226995.8	4.29096	5.49068	2.21084	2.48353	0.0130088	0.0396434	LINC00658	lincRNA	DiffExprLncRNA
ENSG00000230563.3	13.0809	4.60007	1.36033	3.3816	0.000720663	0.00332128	AL121757.1	lincRNA	DiffExprLncRNA
ENSG00000205181.6	143.175	2.54335	0.381991	6.65814	2.77309e-11	4.66122e-10	LINC00654	lincRNA	DiffExprLncRNA
ENSG00000227906.7	34.7776	-1.91565	0.620044	-3.08954	0.00200466	0.00807167	SNAP25-AS1	antisense	DiffExprLncRNA
ENSG00000232712.6	6.27487	6.04363	1.93208	3.12805	0.00175971	0.00722853	KIZ-AS1	antisense	DiffExprLncRNA
ENSG00000230400.2	8.51545	6.48677	1.81202	3.57986	0.000343783	0.00171841	LINC01747	lincRNA	DiffExprLncRNA
ENSG00000213742.6	524.081	2.54069	0.240469	10.5656	4.30423e-26	2.60616e-24	ZNF337-AS1	antisense	DiffExprLncRNA
ENSG00000278383.1	57.6045	2.5285	0.504593	5.01097	5.41561e-07	4.86192e-06	AL031673.1	antisense	DiffExprLncRNA
ENSG00000175170.15	343.761	3.89126	0.286299	13.5916	4.49121e-42	6.83643e-40	FAM182B	lincRNA	DiffExprLncRNA
ENSG00000281376.1	104.835	1.10454	0.391411	2.82195	0.00477326	0.0170656	ABALON	antisense	DiffExprLncRNA
ENSG00000277692.1	15.4185	3.79866	1.0735	3.53859	0.000402267	0.00197987	AL121583.1	lincRNA	DiffExprLncRNA
ENSG00000277301.1	42.3334	2.93531	0.600507	4.88806	1.01835e-06	8.73374e-06	AL034550.2	antisense	DiffExprLncRNA
ENSG00000230753.5	3.96181	5.37714	2.19655	2.448	0.0143653	0.0430029	ZNF341-AS1	antisense	DiffExprLncRNA
ENSG00000285230.1	247.586	1.42816	0.272922	5.23287	1.66901e-07	1.63404e-06	RALY-AS1	lincRNA	DiffExprLncRNA
ENSG00000196756.12	1327.59	-1.06446	0.214431	-4.9641	6.90205e-07	6.07626e-06	SNHG17	processed_transcript	DiffExprLncRNA
ENSG00000229771.2	6.38659	6.07173	1.91855	3.16475	0.00155218	0.00646869	AL035665.1	lincRNA	DiffExprLncRNA
ENSG00000226812.2	46.9162	-2.9576	0.60524	-4.88667	1.02558e-06	8.78322e-06	AL117382.1	antisense	DiffExprLncRNA
ENSG00000229005.2	85.5723	-2.04602	0.413719	-4.94543	7.59746e-07	6.63488e-06	HNF4A-AS1	antisense	DiffExprLncRNA
ENSG00000233376.1	24.9423	-2.25903	0.720499	-3.13536	0.00171641	0.00708054	AL117382.2	antisense	DiffExprLncRNA
ENSG00000286100.1	4.80731	5.65979	2.0539	2.75562	0.00585801	0.0202915	AL008725.1	bidirectional_promoter_lncRNA	DiffExprLncRNA
ENSG00000271984.1	1154.22	8.80061	0.498644	17.6491	1.0342e-69	4.54499e-67	AL008726.1	antisense	DiffExprLncRNA
ENSG00000236028.1	89.1195	9.87175	1.51031	6.53625	6.30801e-11	1.01401e-09	AL354766.2	lincRNA	DiffExprLncRNA
ENSG00000227431.5	40.2697	3.0266	0.625308	4.84018	1.29721e-06	1.09056e-05	CSE1L-AS1	antisense	DiffExprLncRNA
ENSG00000237595.4	74.8533	2.82294	0.466052	6.05714	1.38567e-09	1.84894e-08	LINC01275	lincRNA	DiffExprLncRNA
ENSG00000224397.6	4.84655	5.67687	2.06252	2.75239	0.00591617	0.0204488	SMIM25	lincRNA	DiffExprLncRNA
ENSG00000203999.8	274.831	1.45092	0.269337	5.38702	7.16363e-08	7.46414e-07	LINC01270	lincRNA	DiffExprLncRNA
ENSG00000233077.1	32.9805	4.95024	0.929232	5.32724	9.9718e-08	1.01306e-06	LINC01271	lincRNA	DiffExprLncRNA
ENSG00000234948.1	3.96481	5.38582	2.16321	2.48974	0.0127837	0.0390667	LINC01524	lincRNA	DiffExprLncRNA
ENSG00000271774.1	88.0899	1.79288	0.456122	3.9307	8.4698e-05	0.000493745	AL109930.1	antisense	DiffExprLncRNA
ENSG00000259723.1	172.95	2.49435	0.318388	7.83431	4.71433e-15	1.17522e-13	AL354993.2	antisense	DiffExprLncRNA
ENSG00000278709.2	5.57733	5.87302	1.98783	2.95448	0.00313192	0.0118835	NKILA	antisense	DiffExprLncRNA
ENSG00000228340.5	4.07353	5.42124	2.14345	2.52922	0.0114317	0.0355531	MIR646HG	lincRNA	DiffExprLncRNA
ENSG00000273812.2	4.40268	5.53076	2.11649	2.61317	0.00897061	0.0290771	BX640514.2	lincRNA	DiffExprLncRNA
ENSG00000277496.1	11.7701	2.71076	1.10415	2.45506	0.0140861	0.0424025	AL357033.4	antisense	DiffExprLncRNA
ENSG00000232803.1	32.3917	-5.46743	1.0141	-5.39139	6.99149e-08	7.29594e-07	SLCO4A1-AS1	antisense	DiffExprLncRNA
ENSG00000275620.1	388.501	7.74298	0.598298	12.9417	2.61869e-38	3.31867e-36	AL121827.2	antisense	DiffExprLncRNA
ENSG00000203900.2	7.23209	6.25293	1.8754	3.33418	0.000855527	0.00385171	AL121827.1	antisense	DiffExprLncRNA
ENSG00000280213.1	43.7341	1.69152	0.53913	3.13749	0.001704	0.0070379	UCKL1-AS1	antisense	DiffExprLncRNA
ENSG00000280018.3	45.2248	-1.35339	0.521629	-2.59454	0.00947178	0.0303621	CU634019.6	lincRNA	DiffExprLncRNA
ENSG00000281903.2	72.2395	-1.04223	0.434827	-2.39689	0.016535	0.0483142	LINC02246	lincRNA	DiffExprLncRNA
ENSG00000229425.2	728.524	1.42681	0.276493	5.16037	2.46462e-07	2.3374e-06	AJ009632.2	lincRNA	DiffExprLncRNA
ENSG00000229962.1	11.2607	4.38648	1.39695	3.14004	0.00168925	0.00697909	AP000221.1	lincRNA	DiffExprLncRNA
ENSG00000260583.1	46.002	1.93063	0.532173	3.62783	0.000285815	0.00145999	AP000223.1	antisense	DiffExprLncRNA
ENSG00000238197.5	59.1253	3.02743	0.518385	5.84013	5.21602e-09	6.44539e-08	PAXBP1-AS1	antisense	DiffExprLncRNA
ENSG00000232539.1	3.85309	5.34033	2.17896	2.45086	0.0142516	0.0427283	LINC00945	lincRNA	DiffExprLncRNA
ENSG00000223799.1	7.3408	6.27248	1.86376	3.36549	0.000764073	0.00349249	IL10RB-DT	antisense	DiffExprLncRNA
ENSG00000237945.7	23.1676	2.32192	0.75351	3.08146	0.00205985	0.00826702	LINC00649	antisense	DiffExprLncRNA
ENSG00000234380.2	899.676	1.97993	0.213383	9.27877	1.71443e-20	6.94103e-19	LINC01426	lincRNA	DiffExprLncRNA
ENSG00000286153.1	45.8751	2.54447	0.55405	4.59248	4.38004e-06	3.34763e-05	AP000331.1	antisense	DiffExprLncRNA
ENSG00000236830.6	18.789	3.23886	0.913309	3.54629	0.000390698	0.00192851	CBR3-AS1	processed_transcript	DiffExprLncRNA
ENSG00000242553.1	49.8018	1.80403	0.51103	3.53017	0.000415285	0.00203549	AP001432.1	lincRNA	DiffExprLncRNA
ENSG00000235888.2	61.8754	1.71861	0.468776	3.66616	0.000246224	0.00127734	AF064858.1	lincRNA	DiffExprLncRNA
ENSG00000225431.1	6.93918	6.19436	1.89941	3.2612	0.0011094	0.00482873	LINC01671	lincRNA	DiffExprLncRNA
ENSG00000237989.1	9.84106	6.69952	1.79835	3.72537	0.000195027	0.00104165	LINC01679	lincRNA	DiffExprLncRNA
ENSG00000215458.8	459.197	7.98327	0.596421	13.3853	7.37064e-41	1.06603e-38	AATBC	antisense	DiffExprLncRNA
ENSG00000227039.6	23.741	4.46179	0.97898	4.55759	5.17431e-06	3.89568e-05	ITGB2-AS1	antisense	DiffExprLncRNA
ENSG00000183250.11	60.3977	1.1734	0.486212	2.41335	0.0158068	0.0465359	LINC01547	lincRNA	DiffExprLncRNA
ENSG00000271127.1	98.7077	1.13438	0.401803	2.82324	0.00475414	0.0170039	AP000526.1	sense_intronic	DiffExprLncRNA
ENSG00000274044.4	4.14901	5.45285	2.14832	2.53819	0.0111426	0.0348648	FAM230J	lincRNA	DiffExprLncRNA
ENSG00000215498.9	6.12991	6.01299	1.93647	3.10514	0.0019019	0.00771146	FAM230B	processed_transcript	DiffExprLncRNA
ENSG00000274422.1	468.415	1.88594	0.292954	6.43766	1.21332e-10	1.86881e-09	AC245060.5	lincRNA	DiffExprLncRNA
ENSG00000224277.5	13.8753	7.1919	1.68258	4.27432	1.91718e-05	0.000127856	AP000345.1	antisense	DiffExprLncRNA
ENSG00000272942.1	23.1494	-2.11676	0.752976	-2.81119	0.00493582	0.0175386	AL022324.3	lincRNA	DiffExprLncRNA
ENSG00000225783.7	16.4814	4.94995	1.27991	3.8674	0.000110001	0.000623765	MIAT	lincRNA	DiffExprLncRNA
ENSG00000177993.3	7.92095	3.85156	1.52279	2.52929	0.0114295	0.0355531	ZNRF3-AS1	antisense	DiffExprLncRNA
ENSG00000279159.1	17.3606	2.51739	0.891648	2.8233	0.00475327	0.0170031	AC003681.1	antisense	DiffExprLncRNA
ENSG00000268812.3	60.4748	1.7037	0.475199	3.58523	0.000336775	0.00168794	AC004264.1	antisense	DiffExprLncRNA
ENSG00000272720.1	23.1157	6.46783	1.58953	4.06902	4.72109e-05	0.000290885	AL022322.1	lincRNA	DiffExprLncRNA
ENSG00000272669.1	40.8107	1.5598	0.55383	2.81638	0.00485676	0.0173119	AL021707.6	antisense	DiffExprLncRNA
ENSG00000235513.1	53.7511	5.094	1.61209	3.15987	0.00157839	0.00656986	AL035681.1	antisense	DiffExprLncRNA
ENSG00000237037.9	109.285	1.99134	0.370071	5.38096	7.40908e-08	7.70222e-07	NDUFA6-DT	processed_transcript	DiffExprLncRNA
ENSG00000270022.3	35.8524	-1.58341	0.586373	-2.70035	0.00692665	0.0234157	Z93241.1	lincRNA	DiffExprLncRNA
ENSG00000260708.1	130.801	-1.00567	0.343917	-2.92416	0.00345382	0.0129338	AL118516.1	antisense	DiffExprLncRNA
ENSG00000273192.1	24.149	-2.41714	0.740002	-3.26639	0.00108926	0.00474791	AL671710.1	lincRNA	DiffExprLncRNA
ENSG00000285756.1	1082.5	1.06526	0.193161	5.5149	3.48982e-08	3.83191e-07	BX890604.2	lincRNA	DiffExprLncRNA
ENSG00000237836.5	12.8182	4.5647	1.36178	3.35202	0.000802252	0.00363891	PHKA2-AS1	antisense	DiffExprLncRNA
ENSG00000233785.1	67.6734	1.0854	0.442984	2.4502	0.0142779	0.0428021	AC131011.1	antisense	DiffExprLncRNA
ENSG00000224294.1	699.502	5.8265	0.330599	17.6241	1.60975e-69	6.85325e-67	PINCR	lincRNA	DiffExprLncRNA
ENSG00000285899.1	37.2337	3.46629	0.71226	4.86661	1.13526e-06	9.62132e-06	AL023574.1	lincRNA	DiffExprLncRNA
ENSG00000270069.1	402.753	1.41586	0.291194	4.86227	1.16045e-06	9.81771e-06	MIR222HG	lincRNA	DiffExprLncRNA
ENSG00000269902.1	97.8952	1.58186	0.420236	3.76422	0.000167068	0.000908423	AC234772.2	lincRNA	DiffExprLncRNA
ENSG00000270641.1	4.55064	5.58109	2.0812	2.68167	0.00732549	0.0244575	TSIX	lincRNA	DiffExprLncRNA
ENSG00000271826.5	15.4725	2.69582	0.942677	2.85975	0.00423976	0.0153884	PLS3-AS1	antisense	DiffExprLncRNA
ENSG00000203650.8	22.1491	2.61335	0.820524	3.18497	0.00144768	0.00610223	LINC01285	lincRNA	DiffExprLncRNA
ENSG00000224281.4	43.6267	1.77622	0.568241	3.12582	0.00177311	0.00727259	SLC25A5-AS1	processed_transcript	DiffExprLncRNA
ENSG00000213468.6	784.113	-1.08924	0.207431	-5.25111	1.51188e-07	1.48823e-06	FIRRE	processed_transcript	DiffExprLncRNA
ENSG00000232160.6	32.7176	2.16887	0.637721	3.40097	0.000671471	0.00311679	RAP2C-AS1	antisense	DiffExprLncRNA
ENSG00000232611.1	77.8553	1.32703	0.412706	3.21543	0.0013025	0.00555301	AL683813.1	lincRNA	DiffExprLncRNA
ENSG00000285018.1	26.8395	2.35868	0.702795	3.35614	0.000790375	0.00359522	AC245140.3	antisense	DiffExprLncRNA
ENSG00000231535.6	35.0799	4.43688	0.817573	5.42689	5.7346e-08	6.08216e-07	LINC00278	lincRNA	DiffExprLncRNA
ENSG00000286050.1	624.604	2.60666	0.23513	11.0861	1.46604e-28	1.02687e-26	AC012078.2	lincRNA	DiffExprLncRNA
ENSG00000260197.1	31.5996	-1.59765	0.616115	-2.5931	0.0095116	0.0304703	AC010889.1	lincRNA	DiffExprLncRNA

## Sheet:   WT+ vs KO+ (lncRNAs)
Gene	BaseMean	log2FoldChange	lfcSE	Stat	pvalue	padj	Genename	Genetype	Scale
ENSG00000225905.1	31.0406	6.01493	1.18915	5.05818	4.23273e-07	5.69686e-06	AL391244.1	antisense	DiffExprLncRNA
ENSG00000225285.1	43.7174	3.75429	0.672618	5.58161	2.38306e-08	3.95421e-07	LINC01770	lincRNA	DiffExprLncRNA
ENSG00000215014.5	43.1177	-1.45037	0.559282	-2.59327	0.00950677	0.0405258	AL645728.1	processed_transcript	DiffExprLncRNA
ENSG00000272449.2	22.5139	2.04519	0.767475	2.66483	0.00770279	0.0339222	AL139246.5	lincRNA	DiffExprLncRNA
ENSG00000238164.6	455.4	5.45255	0.391695	13.9204	4.76237e-44	9.58379e-42	TNFRSF14-AS1	antisense	DiffExprLncRNA
ENSG00000177133.10	10.1469	2.9331	1.15317	2.54352	0.0109743	0.0456143	LINC00982	antisense	DiffExprLncRNA
ENSG00000272235.1	5.52292	-5.8587	1.98157	-2.95659	0.00311062	0.0158911	AL590438.1	lincRNA	DiffExprLncRNA
ENSG00000227589.1	13.5423	-2.74717	1.09118	-2.5176	0.0118156	0.0484232	AL136528.1	antisense	DiffExprLncRNA
ENSG00000236423.5	129.287	-1.63506	0.43665	-3.74456	0.000180709	0.00136328	LINC01134	lincRNA	DiffExprLncRNA
ENSG00000233304.6	16.6443	-4.38672	1.16205	-3.77499	0.000160012	0.00122679	LINC01346	lincRNA	DiffExprLncRNA
ENSG00000228526.7	2316.54	3.99015	0.268759	14.8466	7.32129e-50	1.9386e-47	MIR34AHG	lincRNA	DiffExprLncRNA
ENSG00000234546.3	123.43	4.38518	0.473528	9.26065	2.03187e-20	1.1283e-18	LNCTAM34A	lincRNA	DiffExprLncRNA
ENSG00000230337.1	40.4173	-1.72402	0.588256	-2.93072	0.00338174	0.0171093	EXOSC10-AS1	antisense	DiffExprLncRNA
ENSG00000279151.1	16.8708	3.75694	1.02079	3.68044	0.000232831	0.00170954	AL021920.1	lincRNA	DiffExprLncRNA
ENSG00000233431.1	6.51641	6.22155	1.90087	3.273	0.00106411	0.00643736	LINC02596	antisense	DiffExprLncRNA
ENSG00000271420.1	44.2177	1.39295	0.547836	2.54264	0.0110018	0.0456987	AL109936.2	lincRNA	DiffExprLncRNA
ENSG00000225315.2	53.8447	-2.93769	0.579289	-5.07121	3.95299e-07	5.34035e-06	AL591178.1	antisense	DiffExprLncRNA
ENSG00000236528.1	28.4925	-2.53365	0.710287	-3.56708	0.000360981	0.00251955	AL033528.2	antisense	DiffExprLncRNA
ENSG00000237429.1	27.7913	5.83041	1.19535	4.87759	1.07388e-06	1.33333e-05	BX293535.1	antisense	DiffExprLncRNA
ENSG00000197989.14	1004.75	-1.06005	0.253558	-4.18069	2.90625e-05	0.000268183	SNHG12	antisense	DiffExprLncRNA
ENSG00000228176.1	18.1969	7.70353	1.63121	4.72258	2.32873e-06	2.71199e-05	AC092265.1	lincRNA	DiffExprLncRNA
ENSG00000229167.1	295.985	2.4935	0.348562	7.15368	8.44832e-13	2.44273e-11	AC114488.1	antisense	DiffExprLncRNA
ENSG00000259943.1	206.619	-1.08319	0.331003	-3.27244	0.00106622	0.00644574	AL050341.2	antisense	DiffExprLncRNA
ENSG00000228192.7	96.2632	-1.1441	0.401897	-2.84674	0.00441691	0.0213956	AL512353.1	antisense	DiffExprLncRNA
ENSG00000227533.5	194.91	-1.32188	0.345004	-3.83149	0.000127368	0.00100563	SLC2A1-AS1	lincRNA	DiffExprLncRNA
ENSG00000237424.1	127.802	-1.51485	0.380682	-3.9793	6.91192e-05	0.000585616	FOXD2-AS1	lincRNA	DiffExprLncRNA
ENSG00000225028.1	10.8456	6.96112	1.75632	3.96346	7.38699e-05	0.000621678	AC096541.1	lincRNA	DiffExprLncRNA
ENSG00000235545.1	182.17	-1.36182	0.348145	-3.91164	9.167e-05	0.000752239	AC103923.1	antisense	DiffExprLncRNA
ENSG00000223883.1	42.7389	6.46087	1.17154	5.51483	3.4912e-08	5.62235e-07	LINC01707	lincRNA	DiffExprLncRNA
ENSG00000229956.10	66.6628	1.23355	0.490782	2.51344	0.0119561	0.0488874	ZRANB2-AS2	processed_transcript	DiffExprLncRNA
ENSG00000233593.9	238.743	-1.24872	0.316112	-3.95024	7.80729e-05	0.000651817	LINC02609	processed_transcript	DiffExprLncRNA
ENSG00000223745.7	339.249	1.53161	0.315252	4.85838	1.18352e-06	1.4544e-05	CCDC18-AS1	processed_transcript	DiffExprLncRNA
ENSG00000224093.5	1887.17	1.0992	0.251183	4.37608	1.20832e-05	0.000121338	AL109613.1	antisense	DiffExprLncRNA
ENSG00000227963.1	72.9776	-1.87745	0.525467	-3.57292	0.000353029	0.00247504	RBM15-AS1	antisense	DiffExprLncRNA
ENSG00000227811.2	81.4872	1.30526	0.448449	2.91061	0.00360725	0.0180686	INKA2-AS1	bidirectional_promoter_lncRNA	DiffExprLncRNA
ENSG00000227712.1	18.4614	3.31175	0.923639	3.58555	0.000336372	0.00237081	AL359915.1	lincRNA	DiffExprLncRNA
ENSG00000232650.5	53.0353	3.91105	0.619836	6.30983	2.79351e-10	6.10519e-09	LINC01780	lincRNA	DiffExprLncRNA
ENSG00000260941.1	170.803	9.48932	1.46003	6.49938	8.06497e-11	1.87499e-09	LINC00622	sense_overlapping	DiffExprLncRNA
ENSG00000226067.6	29.4304	-3.75642	0.819933	-4.58137	4.61937e-06	5.1122e-05	LINC00623	lincRNA	DiffExprLncRNA
ENSG00000274020.3	178.837	-1.42676	0.36799	-3.87716	0.000105682	0.000853427	LINC01138	processed_transcript	DiffExprLncRNA
ENSG00000274265.4	42.9124	-2.62184	0.603344	-4.34551	1.3895e-05	0.000137407	AC245297.3	lincRNA	DiffExprLncRNA
ENSG00000285184.2	201.047	-1.40099	0.334835	-4.18412	2.86269e-05	0.000264747	AC244033.2	bidirectional_promoter_lncRNA	DiffExprLncRNA
ENSG00000228126.1	57.6309	1.70436	0.492119	3.4633	0.000533601	0.00354068	FALEC	lincRNA	DiffExprLncRNA
ENSG00000237976.1	90.9551	-2.97275	0.475064	-6.25758	3.91002e-10	8.42093e-09	AL391069.2	antisense	DiffExprLncRNA
ENSG00000237975.6	197.955	5.19976	0.449884	11.558	6.72511e-31	7.10799e-29	FLG-AS1	antisense	DiffExprLncRNA
ENSG00000236427.1	26.1499	6.77652	1.56875	4.31969	1.56246e-05	0.000153171	AL589986.2	lincRNA	DiffExprLncRNA
ENSG00000270361.1	15.862	2.50598	0.898488	2.7891	0.00528541	0.0248142	AL451085.1	lincRNA	DiffExprLncRNA
ENSG00000231064.7	18.1181	-2.59506	0.861743	-3.0114	0.00260043	0.0136506	AC234582.1	antisense	DiffExprLncRNA
ENSG00000225855.6	167.712	1.17534	0.365032	3.21983	0.00128267	0.00754749	RUSC1-AS1	antisense	DiffExprLncRNA
ENSG00000237390.1	46.5161	1.86034	0.560866	3.3169	0.000910226	0.00563681	AL139130.1	lincRNA	DiffExprLncRNA
ENSG00000228606.2	28.7513	-1.72923	0.676442	-2.55637	0.0105771	0.0442561	AL139011.1	antisense	DiffExprLncRNA
ENSG00000228917.1	7.77542	5.00471	1.79922	2.78161	0.00540903	0.0253049	AL591806.1	antisense	DiffExprLncRNA
ENSG00000283317.1	4.33431	5.62824	2.14797	2.62025	0.00878643	0.0379699	AL831711.1	lincRNA	DiffExprLncRNA
ENSG00000228697.3	20.9217	-3.15508	0.877464	-3.59568	0.000323542	0.00229066	AL023755.1	lincRNA	DiffExprLncRNA
ENSG00000273062.1	23.8158	-2.10426	0.802289	-2.62282	0.00872044	0.0377171	AL449106.1	antisense	DiffExprLncRNA
ENSG00000273004.1	62.6904	-1.45982	0.529627	-2.75631	0.00584579	0.0269373	AL078644.2	lincRNA	DiffExprLncRNA
ENSG00000230426.3	315.534	4.01387	0.345253	11.6259	3.04346e-31	3.2578e-29	ERVMER61-1	lincRNA	DiffExprLncRNA
ENSG00000285280.1	118.421	-1.54555	0.399028	-3.87329	0.000107374	0.000865097	AL390957.1	lincRNA	DiffExprLncRNA
ENSG00000229191.1	4.87107	-5.66992	2.04163	-2.77715	0.00548375	0.0255736	AL358473.1	antisense	DiffExprLncRNA
ENSG00000233791.5	16.2249	4.43544	1.13982	3.89134	9.96908e-05	0.000809465	LINC01136	lincRNA	DiffExprLncRNA
ENSG00000228792.2	16.0849	4.42348	1.14674	3.85744	0.000114581	0.00091676	AL356310.1	lincRNA	DiffExprLncRNA
ENSG00000227764.1	9.7201	5.3055	1.7364	3.05547	0.0022471	0.0120989	LINC01693	lincRNA	DiffExprLncRNA
ENSG00000225233.1	26.3522	-5.04688	1.05031	-4.80515	1.54633e-06	1.8565e-05	AL592402.1	lincRNA	DiffExprLncRNA
ENSG00000234754.1	28.9033	-2.59345	0.700346	-3.7031	0.000212979	0.00157898	AL445470.1	lincRNA	DiffExprLncRNA
ENSG00000237101.1	11.4874	5.57606	1.72858	3.2258	0.00125619	0.00742296	AC092809.4	antisense	DiffExprLncRNA
ENSG00000234476.2	31.3752	3.78238	0.754042	5.01613	5.27215e-07	6.97271e-06	AC092811.1	lincRNA	DiffExprLncRNA
ENSG00000282418.1	23.2537	5.02018	1.08842	4.61234	3.98158e-06	4.45934e-05	AC092811.2	lincRNA	DiffExprLncRNA
ENSG00000236358.1	22.7946	2.10304	0.747036	2.81518	0.00487505	0.0232169	AL355472.2	antisense	DiffExprLncRNA
ENSG00000227630.3	96.8127	-1.29222	0.406244	-3.1809	0.0014682	0.00845333	LINC01132	lincRNA	DiffExprLncRNA
ENSG00000236008.2	113.701	2.17846	0.393279	5.53922	3.03826e-08	4.94747e-07	LINC01814	lincRNA	DiffExprLncRNA
ENSG00000285872.1	74.0787	-2.26596	0.473674	-4.7838	1.72014e-06	2.04387e-05	AC007240.1	bidirectional_promoter_lncRNA	DiffExprLncRNA
ENSG00000257135.6	141.322	-1.29774	0.36406	-3.56464	0.000364359	0.00253961	ODC1-DT	lincRNA	DiffExprLncRNA
ENSG00000230952.1	1528.8	1.79123	0.256279	6.98936	2.76143e-12	7.58136e-11	AC099344.1	lincRNA	DiffExprLncRNA
ENSG00000229370.1	28.0303	2.68436	0.704339	3.81118	0.000138304	0.0010791	AC073062.1	lincRNA	DiffExprLncRNA
ENSG00000227718.1	55.8814	2.11299	0.524889	4.02559	5.68319e-05	0.000492628	AC016730.1	lincRNA	DiffExprLncRNA
ENSG00000233718.7	5.63537	-5.88508	1.95837	-3.0051	0.00265497	0.0138964	MYCNOS	antisense	DiffExprLncRNA
ENSG00000236289.3	30.202	-3.4215	0.747846	-4.57514	4.75908e-06	5.23915e-05	GACAT3	lincRNA	DiffExprLncRNA
ENSG00000231636.1	10.515	5.44754	1.72327	3.16116	0.00157141	0.00896546	AGBL5-AS1	antisense	DiffExprLncRNA
ENSG00000205334.2	74.1502	5.58045	1.78452	3.12715	0.0017651	0.00986031	LINC01460	lincRNA	DiffExprLncRNA
ENSG00000272754.1	19.3641	2.40584	0.812976	2.9593	0.00308341	0.0157777	AL133245.1	lincRNA	DiffExprLncRNA
ENSG00000260025.1	42.1317	1.77953	0.559536	3.18037	0.00147085	0.00846576	CRIM1-DT	lincRNA	DiffExprLncRNA
ENSG00000236213.1	13.6231	3.14492	1.05201	2.98943	0.00279495	0.0145172	AC006369.1	antisense	DiffExprLncRNA
ENSG00000224875.2	111.123	-3.43209	0.470171	-7.29966	2.8849e-13	8.94816e-12	AC083949.1	antisense	DiffExprLncRNA
ENSG00000231336.1	7.49797	4.95133	1.8103	2.73509	0.00623626	0.0284603	AC017006.1	antisense	DiffExprLncRNA
ENSG00000228100.1	615.359	4.01081	0.292179	13.7272	6.97519e-43	1.36016e-40	LINC01820	lincRNA	DiffExprLncRNA
ENSG00000230773.8	98.5272	-1.17493	0.402599	-2.91837	0.00351865	0.0177023	AC092650.1	lincRNA	DiffExprLncRNA
ENSG00000225889.7	41.9636	1.60911	0.559628	2.87531	0.00403625	0.0198537	AC012368.1	antisense	DiffExprLncRNA
ENSG00000204929.12	134.991	2.45115	0.383879	6.38521	1.71161e-10	3.82038e-09	AC007389.1	processed_transcript	DiffExprLncRNA
ENSG00000281920.1	22.1635	3.08945	0.821766	3.75953	0.000170235	0.00129296	AC007389.5	lincRNA	DiffExprLncRNA
ENSG00000273245.1	48.9523	1.51462	0.529038	2.86297	0.00419695	0.0204999	AC092653.1	lincRNA	DiffExprLncRNA
ENSG00000225439.2	324.626	-1.13986	0.294035	-3.87663	0.000105914	0.000854672	BOLA3-AS1	antisense	DiffExprLncRNA
ENSG00000272711.1	172.452	-1.51249	0.341298	-4.43159	9.35402e-06	9.63951e-05	AC019069.1	lincRNA	DiffExprLncRNA
ENSG00000236209.1	81.0495	-1.1182	0.442521	-2.52688	0.0115082	0.0474182	AC104135.1	lincRNA	DiffExprLncRNA
ENSG00000230836.1	53.7487	-3.89515	0.645746	-6.03201	1.61933e-09	3.19483e-08	LINC01293	lincRNA	DiffExprLncRNA
ENSG00000225420.1	281.191	7.62178	0.669737	11.3803	5.24404e-30	5.45099e-28	AC104134.1	antisense	DiffExprLncRNA
ENSG00000261600.1	63.583	3.57127	0.545726	6.54408	5.9863e-11	1.41395e-09	AC233266.2	lincRNA	DiffExprLncRNA
ENSG00000286101.1	314.179	1.77169	0.325927	5.43584	5.45381e-08	8.50531e-07	AC093894.2	lincRNA	DiffExprLncRNA
ENSG00000228528.1	7.4747	3.93286	1.54169	2.55101	0.0107411	0.0448079	AC068057.1	lincRNA	DiffExprLncRNA
ENSG00000224509.2	4.53943	-5.57069	2.06247	-2.70098	0.00691364	0.0309729	AC010884.1	antisense	DiffExprLncRNA
ENSG00000225328.1	16.0903	2.73134	0.935297	2.92029	0.00349704	0.0176042	LINC01594	antisense	DiffExprLncRNA
ENSG00000214184.3	132.481	1.33433	0.367237	3.63343	0.000279676	0.00201237	GCC2-AS1	antisense	DiffExprLncRNA
ENSG00000224959.1	793.724	1.21456	0.268811	4.51825	6.23537e-06	6.71163e-05	AC017002.1	lincRNA	DiffExprLncRNA
ENSG00000265451.1	34.6759	-1.65771	0.616267	-2.68993	0.00714669	0.0318046	AC012447.1	antisense	DiffExprLncRNA
ENSG00000236682.1	218.771	-2.05638	0.325857	-6.31069	2.77791e-10	6.08167e-09	MAP3K2-DT	lincRNA	DiffExprLncRNA
ENSG00000231731.7	48.8961	-1.56412	0.54671	-2.86097	0.00422341	0.0206091	AC010976.1	antisense	DiffExprLncRNA
ENSG00000286058.1	849.634	2.01848	0.277675	7.26922	3.6156e-13	1.10243e-11	AC018865.3	processed_transcript	DiffExprLncRNA
ENSG00000282944.1	15.442	3.06171	0.958421	3.19454	0.00140054	0.00812669	AC140481.3	processed_transcript	DiffExprLncRNA
ENSG00000286208.1	84.8378	4.06443	0.536428	7.57683	3.54088e-14	1.18445e-12	AC093838.2	lincRNA	DiffExprLncRNA
ENSG00000224559.2	35.4253	4.13036	0.763296	5.41122	6.25984e-08	9.64866e-07	LINC01087	lincRNA	DiffExprLncRNA
ENSG00000231890.7	182.212	1.29867	0.353803	3.67059	0.000241991	0.00176751	DARS-AS1	antisense	DiffExprLncRNA
ENSG00000231969.1	242.011	-1.56658	0.357071	-4.38729	1.1477e-05	0.000115621	AC007364.1	antisense	DiffExprLncRNA
ENSG00000226383.6	252.905	1.00997	0.311893	3.23818	0.00120295	0.00714863	LINC01876	lincRNA	DiffExprLncRNA
ENSG00000283436.1	8.1021	4.00558	1.48004	2.7064	0.0068016	0.0305417	LINC01958	lincRNA	DiffExprLncRNA
ENSG00000204380.4	28.0573	2.0347	0.679606	2.99394	0.00275397	0.0143488	PKP4-AS1	antisense	DiffExprLncRNA
ENSG00000228586.1	25.9074	6.75185	1.55694	4.33662	1.44693e-05	0.000142735	AC005042.2	lincRNA	DiffExprLncRNA
ENSG00000236283.4	481.193	2.37517	0.300526	7.90337	2.71453e-15	1.01462e-13	AC019197.1	antisense	DiffExprLncRNA
ENSG00000260868.1	18.4051	2.51073	0.884466	2.83869	0.00452987	0.0218544	LINC01960	lincRNA	DiffExprLncRNA
ENSG00000237380.7	19.2453	-2.20083	0.839948	-2.62019	0.00878806	0.0379704	HOXD-AS2	antisense	DiffExprLncRNA
ENSG00000234663.6	182.699	4.49721	0.431987	10.4105	2.22013e-25	1.77293e-23	LINC01934	lincRNA	DiffExprLncRNA
ENSG00000260742.1	106.186	-2.35714	0.44604	-5.2846	1.25978e-07	1.8641e-06	AC009962.1	antisense	DiffExprLncRNA
ENSG00000227542.1	108.409	-1.25945	0.390119	-3.22837	0.00124499	0.0073654	AC092614.1	lincRNA	DiffExprLncRNA
ENSG00000233766.7	221.789	2.92085	0.356948	8.18285	2.77213e-16	1.14504e-14	AC098617.1	antisense	DiffExprLncRNA
ENSG00000225953.2	31.9427	-2.36788	0.668762	-3.54069	0.000399084	0.00274907	SATB2-AS1	antisense	DiffExprLncRNA
ENSG00000226312.7	48.3309	-1.83584	0.606013	-3.02937	0.00245065	0.0130027	CFLAR-AS1	antisense	DiffExprLncRNA
ENSG00000273456.1	54.0766	-1.81518	0.513419	-3.53548	0.00040704	0.00279457	AC064836.3	lincRNA	DiffExprLncRNA
ENSG00000197585.9	11.7492	3.13345	1.18053	2.65428	0.00794776	0.0348121	AC068051.1	antisense	DiffExprLncRNA
ENSG00000229267.2	37.7801	-1.65396	0.591523	-2.7961	0.00517229	0.0243878	AC016708.1	antisense	DiffExprLncRNA
ENSG00000236432.7	96.4435	-1.07466	0.419677	-2.56069	0.0104465	0.0438187	AC097662.1	antisense	DiffExprLncRNA
ENSG00000235419.5	35.2193	4.57178	0.81102	5.63707	1.7297e-08	2.94588e-07	AC010149.1	antisense	DiffExprLncRNA
ENSG00000222001.2	36.8947	-1.91465	0.600044	-3.19085	0.00141857	0.00821081	AC106876.1	processed_transcript	DiffExprLncRNA
ENSG00000280744.1	184.274	5.55709	0.510562	10.8842	1.37033e-27	1.23995e-25	LINC01173	lincRNA	DiffExprLncRNA
ENSG00000124835.2	73.3226	2.79461	0.523235	5.34101	9.24287e-08	1.39224e-06	AC105760.1	antisense	DiffExprLncRNA
ENSG00000186235.10	22.1047	5.51265	1.22863	4.48682	7.22954e-06	7.69611e-05	LINC02610	processed_transcript	DiffExprLncRNA
ENSG00000233392.5	129.926	5.92922	0.62008	9.56203	1.15473e-21	6.93249e-20	AC104809.2	processed_transcript	DiffExprLncRNA
ENSG00000224272.2	40.9333	-2.14085	0.5851	-3.65894	0.000253259	0.00183913	AC131097.3	antisense	DiffExprLncRNA
ENSG00000233806.7	11.9815	4.63644	1.38469	3.34837	0.000812896	0.00510827	LINC01237	processed_transcript	DiffExprLncRNA
ENSG00000237940.3	24.0211	5.04562	1.06287	4.74715	2.06303e-06	2.42616e-05	LINC01238	lincRNA	DiffExprLncRNA
ENSG00000233912.1	32.9023	2.37921	0.661583	3.59624	0.000322853	0.00228771	AC026202.2	antisense	DiffExprLncRNA
ENSG00000261572.1	100.041	-1.44938	0.409299	-3.54112	0.00039843	0.00274664	AC097639.1	sense_intronic	DiffExprLncRNA
ENSG00000173811.10	33.0967	-2.13227	0.654465	-3.25804	0.00112186	0.00672715	CCDC13-AS1	antisense	DiffExprLncRNA
ENSG00000232352.1	88.4444	3.37883	0.470444	7.18221	6.85957e-13	2.01541e-11	SEMA3B-AS1	antisense	DiffExprLncRNA
ENSG00000241884.2	10.782	-3.22701	1.19562	-2.69901	0.00695452	0.0311338	AC114401.1	lincRNA	DiffExprLncRNA
ENSG00000243083.6	58.9862	-3.22677	0.552785	-5.8373	5.3052e-09	9.76956e-08	LINC00870	lincRNA	DiffExprLncRNA
ENSG00000242741.1	35.3645	4.57521	0.824642	5.54812	2.88763e-08	4.71983e-07	LINC02005	lincRNA	DiffExprLncRNA
ENSG00000240241.5	65.4766	4.01429	0.583471	6.88001	5.98502e-12	1.57978e-10	AC108752.1	lincRNA	DiffExprLncRNA
ENSG00000243701.6	125.849	3.12755	0.414813	7.53967	4.71178e-14	1.55341e-12	DUBR	lincRNA	DiffExprLncRNA
ENSG00000242622.1	281.387	-1.11563	0.300708	-3.70999	0.000207265	0.00154116	AC092910.3	lincRNA	DiffExprLncRNA
ENSG00000248243.1	187.682	9.63018	1.45362	6.62494	3.47384e-11	8.40236e-10	LINC02014	lincRNA	DiffExprLncRNA
ENSG00000248932.5	58.0523	1.41632	0.503424	2.81337	0.0049026	0.0233216	AC097103.2	antisense	DiffExprLncRNA
ENSG00000243885.1	113.145	-1.58255	0.401876	-3.93792	8.21923e-05	0.00068146	AC108751.4	lincRNA	DiffExprLncRNA
ENSG00000243944.5	16.7287	-2.42882	0.890329	-2.72801	0.0063718	0.0289423	AC117386.2	antisense	DiffExprLncRNA
ENSG00000231574.5	97.6965	-1.09776	0.3999	-2.74508	0.00604961	0.0277444	LINC02015	lincRNA	DiffExprLncRNA
ENSG00000286086.1	39.7749	2.14547	0.645174	3.32541	0.000882887	0.00549185	AC099661.1	lincRNA	DiffExprLncRNA
ENSG00000226859.1	63.8792	9.51543	1.51276	6.2901	3.1726e-10	6.89774e-09	LINC02051	lincRNA	DiffExprLncRNA
ENSG00000229155.1	6.3679	-6.06078	1.90651	-3.17899	0.00147791	0.00849758	LINC02038	lincRNA	DiffExprLncRNA
ENSG00000230102.7	54.5774	2.75336	0.535754	5.13922	2.75874e-07	3.82981e-06	LINC02028	processed_transcript	DiffExprLncRNA
ENSG00000235897.1	80.1723	3.16068	0.489784	6.45322	1.09495e-10	2.50624e-09	TM4SF19-AS1	antisense	DiffExprLncRNA
ENSG00000283183.1	32.0874	-4.28213	0.829949	-5.15951	2.47591e-07	3.46816e-06	AC116565.1	lincRNA	DiffExprLncRNA
ENSG00000249673.6	1409.81	2.13408	0.257409	8.29061	1.12665e-16	4.86123e-15	NOP14-AS1	antisense	DiffExprLncRNA
ENSG00000270090.5	8.16299	-3.84329	1.50915	-2.54667	0.0108757	0.0452794	AL590235.1	lincRNA	DiffExprLncRNA
ENSG00000250986.1	135.478	2.23327	0.391696	5.70153	1.18738e-08	2.0742e-07	LINC02600	lincRNA	DiffExprLncRNA
ENSG00000246526.2	288.754	2.188	0.346645	6.31192	2.75593e-10	6.03879e-09	LINC002481	lincRNA	DiffExprLncRNA
ENSG00000247624.6	26.5171	2.80401	0.730556	3.83818	0.00012395	0.000980997	CPEB2-DT	lincRNA	DiffExprLncRNA
ENSG00000226950.6	1757.4	-1.12374	0.269073	-4.17634	2.96232e-05	0.000272757	DANCR	processed_transcript	DiffExprLncRNA
ENSG00000249307.6	147.836	4.3618	0.487431	8.94855	3.60193e-19	1.8321e-17	LINC01088	processed_transcript	DiffExprLncRNA
ENSG00000272677.1	42.4804	-1.70393	0.568589	-2.99677	0.00272857	0.0142374	AC124016.1	antisense	DiffExprLncRNA
ENSG00000251095.6	3956.76	9.61982	1.30724	7.35887	1.85467e-13	5.84639e-12	AC097478.1	antisense	DiffExprLncRNA
ENSG00000274238.1	11.7181	7.06541	1.74134	4.05745	4.96114e-05	0.000436202	AC097478.2	antisense	DiffExprLncRNA
ENSG00000246090.6	348.716	1.40234	0.329991	4.24962	2.1413e-05	0.000203416	AP002026.1	antisense	DiffExprLncRNA
ENSG00000251432.6	56.3381	2.09919	0.522088	4.02076	5.80097e-05	0.0005018	LINC02615	lincRNA	DiffExprLncRNA
ENSG00000246876.6	31.6202	-2.0378	0.674155	-3.02276	0.00250485	0.0132289	LINC02466	lincRNA	DiffExprLncRNA
ENSG00000248307.5	16.2003	-2.55751	0.930013	-2.74997	0.00596003	0.0273785	LINC00616	lincRNA	DiffExprLncRNA
ENSG00000248429.5	1202.81	1.35282	0.301963	4.4801	7.46081e-06	7.90217e-05	FAM198B-AS1	antisense	DiffExprLncRNA
ENSG00000273449.1	96.3315	1.74173	0.437655	3.97969	6.90043e-05	0.00058484	AC093788.1	lincRNA	DiffExprLncRNA
ENSG00000225138.7	99.5703	1.29206	0.446517	2.89365	0.00380792	0.0188783	SLC9A3-AS1	processed_transcript	DiffExprLncRNA
ENSG00000271781.1	73.6894	1.81253	0.48109	3.76754	0.000164865	0.00125857	AC026740.1	antisense	DiffExprLncRNA
ENSG00000271980.1	18.9828	5.31309	1.27097	4.18034	2.91075e-05	0.0002685	AC012640.4	antisense	DiffExprLncRNA
ENSG00000271715.1	9.3143	4.17945	1.47563	2.83232	0.0046212	0.0222226	AC012640.3	lincRNA	DiffExprLncRNA
ENSG00000261360.1	82.7096	1.86274	0.460889	4.04163	5.30807e-05	0.000463305	AC010491.1	antisense	DiffExprLncRNA
ENSG00000250337.6	5584.13	5.35509	0.256483	20.8789	8.32082e-97	1.04655e-93	PURPL	lincRNA	DiffExprLncRNA
ENSG00000248461.2	277.741	-2.13664	0.393836	-5.42521	5.78875e-08	8.97756e-07	LINC02119	lincRNA	DiffExprLncRNA
ENSG00000251257.2	17.0056	5.15314	1.29057	3.99292	6.52634e-05	0.000556509	AC010457.1	antisense	DiffExprLncRNA
ENSG00000251141.5	28.7902	-1.69942	0.661215	-2.57015	0.0101655	0.0428546	MRPS30-DT	antisense	DiffExprLncRNA
ENSG00000286048.1	68.5753	2.93051	0.522425	5.60945	2.02976e-08	3.39711e-07	AC008966.3	antisense	DiffExprLncRNA
ENSG00000247796.2	158.248	1.38346	0.348905	3.96514	7.33522e-05	0.000617528	AC008966.1	antisense	DiffExprLncRNA
ENSG00000227908.3	46.1343	-1.50475	0.546601	-2.75292	0.0059067	0.0271755	AC016596.1	antisense	DiffExprLncRNA
ENSG00000237705.1	14.1906	2.46581	0.961458	2.56466	0.0103278	0.043386	AC008937.2	antisense	DiffExprLncRNA
ENSG00000152931.7	835.197	-1.58995	0.262485	-6.05731	1.38414e-09	2.75677e-08	PART1	lincRNA	DiffExprLncRNA
ENSG00000271926.1	20.6278	3.26654	0.891859	3.66262	0.000249647	0.00181604	AC008972.1	lincRNA	DiffExprLncRNA
ENSG00000272081.1	44.5628	2.93559	0.594867	4.93486	8.02082e-07	1.02314e-05	AC008972.2	lincRNA	DiffExprLncRNA
ENSG00000271714.1	146.64	2.05623	0.371704	5.5319	3.1678e-08	5.14435e-07	AC010501.1	antisense	DiffExprLncRNA
ENSG00000279232.2	30.4264	3.44263	0.747325	4.6066	4.09301e-06	4.57395e-05	AC008522.1	antisense	DiffExprLncRNA
ENSG00000251169.2	42.988	-1.72721	0.570514	-3.02746	0.00246616	0.0130685	LINC01843	lincRNA	DiffExprLncRNA
ENSG00000249637.1	74.1015	-2.4284	0.480436	-5.05459	4.31323e-07	5.7959e-06	AC008438.1	antisense	DiffExprLncRNA
ENSG00000249669.9	111.017	1.35582	0.410753	3.30081	0.000964061	0.00590988	CARMN	lincRNA	DiffExprLncRNA
ENSG00000253522.6	243.073	-1.08429	0.310705	-3.48977	0.000483441	0.00324465	MIR3142HG	lincRNA	DiffExprLncRNA
ENSG00000254186.2	31.8019	2.05122	0.645094	3.17973	0.00147414	0.00847975	AC113414.1	antisense	DiffExprLncRNA
ENSG00000249684.5	49.4316	-1.35306	0.520028	-2.6019	0.00927097	0.0396416	AC106795.2	antisense	DiffExprLncRNA
ENSG00000250999.1	70.275	2.87711	0.499995	5.75427	8.7016e-09	1.54582e-07	AC136604.3	antisense	DiffExprLncRNA
ENSG00000245317.2	62.3329	-1.88268	0.511631	-3.67976	0.000233453	0.0017136	AC008393.1	lincRNA	DiffExprLncRNA
ENSG00000250903.8	1214.53	1.11317	0.248695	4.47605	7.60354e-06	8.0398e-05	GMDS-DT	lincRNA	DiffExprLncRNA
ENSG00000230269.6	815.083	2.9693	0.273327	10.8635	1.71936e-27	1.5502e-25	LINC02525	lincRNA	DiffExprLncRNA
ENSG00000270504.1	249.079	-1.35396	0.313384	-4.32045	1.55713e-05	0.000152768	AL391422.4	antisense	DiffExprLncRNA
ENSG00000260604.2	1860.32	-2.4135	0.248623	-9.70748	2.80171e-22	1.75753e-20	AL590004.3	lincRNA	DiffExprLncRNA
ENSG00000272142.1	54.634	-1.36995	0.51805	-2.64444	0.00818261	0.0356916	AL359643.3	lincRNA	DiffExprLncRNA
ENSG00000261189.1	523.383	-1.60779	0.290016	-5.54379	2.95988e-08	4.83165e-07	AL031058.1	antisense	DiffExprLncRNA
ENSG00000229931.1	162.196	-1.59682	0.423782	-3.76802	0.000164546	0.00125696	AL137003.1	antisense	DiffExprLncRNA
ENSG00000272341.1	305.066	-1.33499	0.335078	-3.98412	6.77308e-05	0.000576182	AL137003.2	lincRNA	DiffExprLncRNA
ENSG00000272269.1	145.295	-2.11253	0.392747	-5.37885	7.49624e-08	1.14422e-06	AL138724.1	antisense	DiffExprLncRNA
ENSG00000272462.2	140.259	-1.27613	0.382908	-3.33273	0.000859987	0.00536736	U91328.1	lincRNA	DiffExprLncRNA
ENSG00000272468.1	50.0633	2.56489	0.580499	4.41842	9.94248e-06	0.000101958	AL021807.1	lincRNA	DiffExprLncRNA
ENSG00000246350.1	295.248	-3.30775	0.386025	-8.56877	1.046e-17	4.79273e-16	AL049543.1	antisense	DiffExprLncRNA
ENSG00000214922.9	98.8306	-1.11746	0.400118	-2.79283	0.00522494	0.024567	HLA-F-AS1	processed_transcript	DiffExprLncRNA
ENSG00000228022.5	28.5618	-2.53863	0.714273	-3.55415	0.000379203	0.00262706	HCG20	lincRNA	DiffExprLncRNA
ENSG00000206337.10	125.087	-1.2783	0.379077	-3.37214	0.000745878	0.00475363	HCP5	sense_overlapping	DiffExprLncRNA
ENSG00000232940.5	61.1441	1.68487	0.504505	3.33964	0.000838864	0.00525439	HCG25	antisense	DiffExprLncRNA
ENSG00000197251.3	13.5994	5.80796	1.65387	3.51173	0.000445201	0.0030235	LINC00336	lincRNA	DiffExprLncRNA
ENSG00000225339.3	43.8577	2.27314	0.566923	4.0096	6.08214e-05	0.000523243	AL354740.1	processed_transcript	DiffExprLncRNA
ENSG00000224666.3	4.1943	5.58505	2.10986	2.64712	0.00811815	0.0354412	Z84484.1	antisense	DiffExprLncRNA
ENSG00000281450.1	9.03436	4.17914	1.46135	2.85977	0.00423946	0.0206714	PANDAR	lincRNA	DiffExprLncRNA
ENSG00000285244.1	32.5354	6.08197	1.1736	5.18234	2.19121e-07	3.10185e-06	DINOL	bidirectional_promoter_lncRNA	DiffExprLncRNA
ENSG00000234753.5	124.013	-2.79793	0.424904	-6.58486	4.5532e-11	1.08978e-09	FOXP4-AS1	antisense	DiffExprLncRNA
ENSG00000226917.5	11.3091	-4.38404	1.39029	-3.15334	0.00161416	0.00915539	LINC01276	lincRNA	DiffExprLncRNA
ENSG00000272223.1	30.1038	2.12204	0.663929	3.19619	0.00139256	0.00808444	AL136304.1	antisense	DiffExprLncRNA
ENSG00000236961.1	10.7391	4.39505	1.40583	3.12631	0.00177017	0.00988428	AL136131.2	lincRNA	DiffExprLncRNA
ENSG00000226733.3	43.0123	-3.53195	0.681455	-5.18296	2.18394e-07	3.0933e-06	AL138826.1	lincRNA	DiffExprLncRNA
ENSG00000266680.1	667.482	2.25963	0.270539	8.35233	6.69273e-17	2.91777e-15	AL135905.1	antisense	DiffExprLncRNA
ENSG00000234155.1	106.24	-3.16406	0.458079	-6.90725	4.94124e-12	1.32428e-10	LINC02535	lincRNA	DiffExprLncRNA
ENSG00000203809.6	41.6542	-1.47635	0.565517	-2.61062	0.00903793	0.0388764	LIN28B-AS1	lincRNA	DiffExprLncRNA
ENSG00000272476.1	50.6158	-1.76244	0.542952	-3.24603	0.00117025	0.00697739	AL024507.2	antisense	DiffExprLncRNA
ENSG00000231889.7	505.908	1.17691	0.275582	4.27063	1.94923e-05	0.000186934	TRAF3IP2-AS1	antisense	DiffExprLncRNA
ENSG00000230943.2	56.6414	2.69384	0.618749	4.35368	1.33868e-05	0.000132839	LINC02541	lincRNA	DiffExprLncRNA
ENSG00000227502.2	141.943	-1.46343	0.39631	-3.69265	0.000221934	0.00163957	LINC01268	lincRNA	DiffExprLncRNA
ENSG00000175967.3	20.2178	-2.15314	0.825092	-2.60957	0.00906552	0.0389551	FO393415.1	antisense	DiffExprLncRNA
ENSG00000237499.6	160.039	-2.11935	0.35913	-5.90135	3.60533e-09	6.8036e-08	AL357060.1	antisense	DiffExprLncRNA
ENSG00000227627.2	138.544	-1.24751	0.36077	-3.45792	0.000544368	0.00360357	AL080276.2	antisense	DiffExprLncRNA
ENSG00000272841.1	128.223	-1.46632	0.390167	-3.75818	0.000171153	0.00129914	AL139393.2	antisense	DiffExprLncRNA
ENSG00000227598.1	204.734	-1.22198	0.337402	-3.62174	0.000292631	0.00209659	Z94721.1	bidirectional_promoter_lncRNA	DiffExprLncRNA
ENSG00000285730.1	334.817	-1.25441	0.319345	-3.92805	8.56369e-05	0.000706989	Z94721.3	bidirectional_promoter_lncRNA	DiffExprLncRNA
ENSG00000280707.2	22.4891	-3.5142	0.872392	-4.02824	5.61969e-05	0.000487291	AL353747.4	lincRNA	DiffExprLncRNA
ENSG00000231720.1	152.844	-1.58732	0.358356	-4.42944	9.44771e-06	9.72808e-05	AL353747.3	lincRNA	DiffExprLncRNA
ENSG00000228648.1	170.74	-1.97673	0.359593	-5.49714	3.86002e-08	6.18464e-07	AL353747.2	lincRNA	DiffExprLncRNA
ENSG00000272549.1	33.8532	-2.08758	0.631341	-3.30658	0.000944414	0.00581418	LINC02538	lincRNA	DiffExprLncRNA
ENSG00000203688.5	28.3704	-1.96886	0.736565	-2.67303	0.00751696	0.0332143	LINC02487	lincRNA	DiffExprLncRNA
ENSG00000198221.8	131.799	-1.37446	0.378671	-3.62969	0.000283757	0.00203999	AFDN-DT	lincRNA	DiffExprLncRNA
ENSG00000233085.5	76.8777	-1.11209	0.43863	-2.53538	0.0112326	0.0465267	BX322234.2	lincRNA	DiffExprLncRNA
ENSG00000225981.1	29.2305	3.64741	0.777285	4.6925	2.69892e-06	3.10148e-05	AC102953.1	antisense	DiffExprLncRNA
ENSG00000273084.1	396.271	1.00341	0.301677	3.32612	0.00088065	0.00548335	AC092171.5	lincRNA	DiffExprLncRNA
ENSG00000230658.1	118.638	1.67297	0.410314	4.07728	4.55657e-05	0.000403452	KLHL7-DT	lincRNA	DiffExprLncRNA
ENSG00000270933.1	56.6342	-2.79883	0.564628	-4.95695	7.16088e-07	9.22807e-06	AC010719.1	lincRNA	DiffExprLncRNA
ENSG00000253552.7	185.938	-1.12323	0.33409	-3.36206	0.00077363	0.0049044	HOXA-AS2	antisense	DiffExprLncRNA
ENSG00000273014.1	107.216	-1.03315	0.396864	-2.60329	0.00923334	0.0395012	AC018645.2	lincRNA	DiffExprLncRNA
ENSG00000197085.11	645.559	1.83192	0.294192	6.22695	4.7559e-10	1.01557e-08	NPSR1-AS1	processed_transcript	DiffExprLncRNA
ENSG00000272768.1	22.5305	-2.14623	0.75328	-2.84918	0.00438324	0.0212407	AC004854.2	antisense	DiffExprLncRNA
ENSG00000224057.1	188.877	-1.8885	0.401164	-4.70755	2.50716e-06	2.90779e-05	EGFR-AS1	antisense	DiffExprLncRNA
ENSG00000223475.1	37.1422	4.93275	0.857593	5.75186	8.8268e-09	1.56475e-07	AC099681.1	antisense	DiffExprLncRNA
ENSG00000233977.1	20.7589	7.89554	1.61359	4.89316	9.92283e-07	1.24493e-05	AC099681.3	lincRNA	DiffExprLncRNA
ENSG00000231394.1	29.7402	5.37817	1.04928	5.12559	2.96609e-07	4.09506e-06	AC099681.2	lincRNA	DiffExprLncRNA
ENSG00000182165.17	577.948	3.35499	0.285934	11.7335	8.58634e-32	9.59953e-30	TP53TG1	lincRNA	DiffExprLncRNA
ENSG00000243144.6	20.1292	2.11515	0.784186	2.69726	0.00699136	0.0312876	AC079760.2	lincRNA	DiffExprLncRNA
ENSG00000237640.1	6.65635	-6.12829	1.90795	-3.21198	0.00131826	0.00771898	AC004522.2	antisense	DiffExprLncRNA
ENSG00000226965.1	144.031	10.6877	1.49298	7.15862	8.14952e-13	2.36722e-11	AC092167.1	lincRNA	DiffExprLncRNA
ENSG00000242588.6	261.487	1.17662	0.382316	3.07761	0.00208668	0.0113542	AC108010.1	processed_transcript	DiffExprLncRNA
ENSG00000285106.1	244.384	2.33591	0.321089	7.27494	3.4657e-13	1.06187e-11	AC016831.7	lincRNA	DiffExprLncRNA
ENSG00000233559.1	939.15	1.70017	0.268374	6.33508	2.37216e-10	5.23436e-09	LINC00513	lincRNA	DiffExprLncRNA
ENSG00000226380.9	660.878	2.46563	0.269604	9.14537	5.94249e-20	3.19409e-18	AC016831.1	lincRNA	DiffExprLncRNA
ENSG00000273319.1	133.104	1.23884	0.413391	2.99676	0.00272862	0.0142374	AC058791.1	lincRNA	DiffExprLncRNA
ENSG00000260231.2	667.978	1.23724	0.27017	4.5795	4.66095e-06	5.14835e-05	KDM7A-DT	bidirectional_promoter_lncRNA	DiffExprLncRNA
ENSG00000243836.5	11.2039	-3.23844	1.24905	-2.59271	0.00952227	0.0405644	WDR86-AS1	processed_transcript	DiffExprLncRNA
ENSG00000229591.1	19.2668	2.02272	0.803454	2.51753	0.0118182	0.0484259	AC006017.1	antisense	DiffExprLncRNA
ENSG00000182366.9	105.443	5.59611	0.612617	9.13476	6.55534e-20	3.50105e-18	FAM87A	lincRNA	DiffExprLncRNA
ENSG00000253982.1	128.996	1.28445	0.398981	3.21931	0.00128498	0.00755935	AC100810.1	antisense	DiffExprLncRNA
ENSG00000254625.1	16.2094	2.5281	0.906105	2.79008	0.00526957	0.0247537	AF233439.2	antisense	DiffExprLncRNA
ENSG00000284606.1	27.8382	2.10199	0.693712	3.03006	0.00244504	0.0129785	AC105233.5	processed_transcript	DiffExprLncRNA
ENSG00000272267.2	66.7406	-1.67959	0.471246	-3.56413	0.000365061	0.00254379	AC021242.3	antisense	DiffExprLncRNA
ENSG00000253671.2	152.149	2.12791	0.397249	5.35662	8.47941e-08	1.28416e-06	AC027117.1	processed_transcript	DiffExprLncRNA
ENSG00000253125.1	25.035	4.67053	0.98611	4.73632	2.1763e-06	2.54864e-05	AC055854.1	processed_transcript	DiffExprLncRNA
ENSG00000245025.2	78.7867	1.87044	0.521878	3.58405	0.000338307	0.00238245	AC107959.1	antisense	DiffExprLncRNA
ENSG00000253616.5	93.1107	-3.69747	0.501434	-7.37378	1.65851e-13	5.25439e-12	AC107959.3	antisense	DiffExprLncRNA
ENSG00000254109.5	167.815	2.39235	0.354035	6.75737	1.4052e-11	3.55255e-10	RBPMS-AS1	antisense	DiffExprLncRNA
ENSG00000247134.6	13.5465	2.6367	0.979312	2.6924	0.00709403	0.0316457	AC090204.1	lincRNA	DiffExprLncRNA
ENSG00000253474.1	7.45378	6.41259	1.87158	3.4263	0.000611863	0.00399673	AC022568.1	lincRNA	DiffExprLncRNA
ENSG00000272457.1	10.3075	5.41771	1.73545	3.12179	0.00179753	0.0100193	AC113194.1	antisense	DiffExprLncRNA
ENSG00000254777.5	11.5022	-4.40409	1.36566	-3.22489	0.00126021	0.00744319	AC022182.1	lincRNA	DiffExprLncRNA
ENSG00000253339.1	21.3613	-2.08438	0.785311	-2.65421	0.00794944	0.0348134	AC111149.2	lincRNA	DiffExprLncRNA
ENSG00000254231.2	132.008	-1.04638	0.374384	-2.79494	0.00519087	0.0244503	AC103760.1	processed_transcript	DiffExprLncRNA
ENSG00000248858.7	59.9524	1.62903	0.506655	3.21526	0.00130328	0.00764553	AC104211.1	processed_transcript	DiffExprLncRNA
ENSG00000271971.1	109.137	1.04184	0.391025	2.66438	0.00771306	0.0339615	AC120053.1	antisense	DiffExprLncRNA
ENSG00000253666.1	209.363	2.3234	0.332902	6.97923	2.9681e-12	8.12434e-11	AP000424.1	antisense	DiffExprLncRNA
ENSG00000254364.1	18.1064	3.32075	0.937096	3.54366	0.000394609	0.00272254	AP000424.2	antisense	DiffExprLncRNA
ENSG00000246263.2	170.469	3.05518	0.37199	8.21306	2.15629e-16	9.01022e-15	UBR5-AS1	antisense	DiffExprLncRNA
ENSG00000272037.1	9.67605	3.63467	1.29502	2.80666	0.00500577	0.0237336	AP002907.1	antisense	DiffExprLncRNA
ENSG00000247081.7	116.387	3.11626	0.445865	6.98924	2.76371e-12	7.58136e-11	BAALC-AS1	antisense	DiffExprLncRNA
ENSG00000245149.3	114.379	-1.3283	0.408393	-3.25249	0.00114398	0.00684184	RNF139-AS1	lincRNA	DiffExprLncRNA
ENSG00000255491.2	34.983	-3.83797	0.799103	-4.80285	1.56424e-06	1.87463e-05	AC100858.3	lincRNA	DiffExprLncRNA
ENSG00000253438.3	126.86	1.97138	0.41646	4.73365	2.2052e-06	2.58008e-05	PCAT1	antisense	DiffExprLncRNA
ENSG00000282961.1	99.4295	1.68603	0.451057	3.73795	0.00018553	0.00139731	PRNCR1	lincRNA	DiffExprLncRNA
ENSG00000249859.10	3209.68	2.60244	0.282541	9.21083	3.23617e-20	1.76585e-18	PVT1	lincRNA	DiffExprLncRNA
ENSG00000286034.1	64.9605	3.1707	0.537387	5.90021	3.63048e-09	6.84592e-08	AC100822.1	lincRNA	DiffExprLncRNA
ENSG00000254275.6	42.1677	1.67538	0.582675	2.87532	0.00403619	0.0198537	LINC00824	processed_transcript	DiffExprLncRNA
ENSG00000261220.2	23.9683	-2.39529	0.771346	-3.10534	0.00190062	0.0105008	AC103706.1	lincRNA	DiffExprLncRNA
ENSG00000253196.1	13.4038	-2.72468	1.04318	-2.61189	0.00900428	0.0387528	AC083841.1	antisense	DiffExprLncRNA
ENSG00000253716.5	200.876	2.2914	0.339263	6.75404	1.43779e-11	3.62765e-10	MINCR	antisense	DiffExprLncRNA
ENSG00000272172.1	29.4192	1.65961	0.648297	2.55995	0.0104688	0.0438903	AC138696.2	antisense	DiffExprLncRNA
ENSG00000253931.1	50.3811	2.18574	0.549045	3.98098	6.86306e-05	0.000582457	AC105118.1	antisense	DiffExprLncRNA
ENSG00000236924.1	84.1803	-1.8607	0.433484	-4.29243	1.76725e-05	0.000171775	AL162411.1	lincRNA	DiffExprLncRNA
ENSG00000285911.1	14.3851	7.36354	1.67602	4.39346	1.11559e-05	0.000112701	AL391834.3	bidirectional_promoter_lncRNA	DiffExprLncRNA
ENSG00000240498.8	78.7512	-3.01604	0.496894	-6.06979	1.28075e-09	2.5712e-08	CDKN2B-AS1	antisense	DiffExprLncRNA
ENSG00000230074.1	50.1389	3.94473	0.628877	6.27266	3.54925e-10	7.67022e-09	AL162231.2	antisense	DiffExprLncRNA
ENSG00000231527.6	74.4761	1.13486	0.441244	2.57196	0.0101125	0.042667	FAM27C	processed_transcript	DiffExprLncRNA
ENSG00000229422.2	87.3008	-1.3158	0.425693	-3.09096	0.00199507	0.0109259	AL512625.2	lincRNA	DiffExprLncRNA
ENSG00000229109.1	29.6364	3.35571	0.74701	4.49218	7.04968e-06	7.52049e-05	AL137847.1	antisense	DiffExprLncRNA
ENSG00000254473.1	74.6997	-1.40843	0.464379	-3.03293	0.00242191	0.012872	AL354920.1	antisense	DiffExprLncRNA
ENSG00000271155.1	67.5542	-2.60984	0.513736	-5.08013	3.77182e-07	5.10383e-06	AL161729.1	antisense	DiffExprLncRNA
ENSG00000232283.1	34.5645	-2.80117	0.67041	-4.17829	2.93712e-05	0.000270634	HSD17B3-AS1	antisense	DiffExprLncRNA
ENSG00000227482.1	24.0243	-1.89302	0.747047	-2.534	0.0112768	0.046656	AL157702.2	lincRNA	DiffExprLncRNA
ENSG00000256040.2	187.794	4.57961	0.442836	10.3415	4.57119e-25	3.59338e-23	PAPPA-AS1	antisense	DiffExprLncRNA
ENSG00000285820.1	113.264	7.88928	1.08605	7.26417	3.75333e-13	1.14028e-11	AL157829.1	antisense	DiffExprLncRNA
ENSG00000233901.5	229.54	4.11305	0.372552	11.0402	2.44471e-28	2.26925e-26	LINC01503	lincRNA	DiffExprLncRNA
ENSG00000225361.3	115.944	-1.14194	0.419283	-2.72356	0.00645824	0.029261	PPP1R26-AS1	antisense	DiffExprLncRNA
ENSG00000260193.1	11.2634	2.84448	1.12659	2.52485	0.0115747	0.0476378	AL138781.1	lincRNA	DiffExprLncRNA
ENSG00000262075.3	20.7783	-4.25594	1.10464	-3.85278	0.000116784	0.000930534	AC174065.1	lincRNA	DiffExprLncRNA
ENSG00000227512.1	4.24527	-5.47582	2.09611	-2.61237	0.00899176	0.0387109	AL592301.1	antisense	DiffExprLncRNA
ENSG00000237886.1	37.8953	7.31635	1.51893	4.81677	1.45897e-06	1.75769e-05	NALT1	antisense	DiffExprLncRNA
ENSG00000279141.3	71.3819	4.38918	0.606823	7.23306	4.72243e-13	1.42097e-11	AL590226.2	lincRNA	DiffExprLncRNA
ENSG00000228401.4	6.47464	-6.08743	1.91023	-3.18675	0.00143879	0.00831444	AL590226.1	antisense	DiffExprLncRNA
ENSG00000231298.6	73.6088	4.02654	0.559282	7.19948	6.04406e-13	1.78658e-11	MANCR	lincRNA	DiffExprLncRNA
ENSG00000205488.9	29.9734	-1.63414	0.65134	-2.5089	0.0121109	0.0494081	CALML3-AS1	antisense	DiffExprLncRNA
ENSG00000228951.1	42.4087	6.48422	1.15386	5.6196	1.91403e-08	3.2379e-07	AL365356.3	lincRNA	DiffExprLncRNA
ENSG00000215244.2	19.1424	2.52995	0.825951	3.06307	0.00219079	0.0118285	LINC02649	lincRNA	DiffExprLncRNA
ENSG00000176236.6	14.0898	-3.3362	1.06651	-3.12816	0.00175907	0.00983749	C10orf111	bidirectional_promoter_lncRNA	DiffExprLncRNA
ENSG00000230109.1	10.2493	4.40434	1.44576	3.04639	0.00231606	0.012417	LINC02643	lincRNA	DiffExprLncRNA
ENSG00000232624.7	61.5815	-3.30122	0.54464	-6.06129	1.35032e-09	2.69582e-08	LINC01517	processed_transcript	DiffExprLncRNA
ENSG00000231187.2	60.8278	-1.47715	0.506891	-2.91414	0.00356669	0.0179082	AL356056.2	antisense	DiffExprLncRNA
ENSG00000236671.8	382.311	-1.48785	0.310006	-4.79941	1.59133e-06	1.90257e-05	PRKG1-AS1	antisense	DiffExprLncRNA
ENSG00000232682.2	12.2925	2.66179	1.05303	2.52773	0.0114801	0.0473391	AL592430.1	antisense	DiffExprLncRNA
ENSG00000233643.2	16.248	-2.80359	0.938163	-2.98838	0.0028046	0.0145613	LINC02625	lincRNA	DiffExprLncRNA
ENSG00000237512.6	83.3056	9.90055	1.51239	6.5463	5.8979e-11	1.39569e-09	UNC5B-AS1	antisense	DiffExprLncRNA
ENSG00000229569.1	33.1295	5.53884	1.03274	5.36325	8.174e-08	1.2394e-06	AL356753.1	lincRNA	DiffExprLncRNA
ENSG00000285972.1	23.3195	5.56992	1.22134	4.5605	5.10308e-06	5.58121e-05	CERNA2	lincRNA	DiffExprLncRNA
ENSG00000270002.1	12.9014	-3.53874	1.12941	-3.13326	0.00172878	0.00970701	AC022028.2	antisense	DiffExprLncRNA
ENSG00000227896.2	116.91	-1.24257	0.387823	-3.20396	0.00135553	0.00790963	AL731569.1	antisense	DiffExprLncRNA
ENSG00000272631.1	128.692	-1.20153	0.376127	-3.19448	0.00140081	0.00812669	AC067750.1	antisense	DiffExprLncRNA
ENSG00000224750.6	10.2102	3.25152	1.21731	2.67107	0.00756091	0.0333807	AL391704.1	lincRNA	DiffExprLncRNA
ENSG00000273162.1	65.1637	-2.13116	0.539774	-3.94825	7.87256e-05	0.00065683	AL133215.2	lincRNA	DiffExprLncRNA
ENSG00000234699.1	5.61403	6.00965	1.96693	3.05535	0.00224801	0.0121012	AL139339.1	antisense	DiffExprLncRNA
ENSG00000203497.2	173.171	-1.34678	0.377744	-3.56533	0.000363399	0.00253432	PDCD4-AS1	antisense	DiffExprLncRNA
ENSG00000229272.1	143.77	7.25086	0.809166	8.96091	3.22008e-19	1.64303e-17	AL157788.1	antisense	DiffExprLncRNA
ENSG00000236303.3	20.2614	2.49768	0.806872	3.0955	0.0019648	0.0107882	LINC02646	lincRNA	DiffExprLncRNA
ENSG00000230098.1	7.69368	6.46355	1.84089	3.51111	0.000446246	0.00302814	TCERG1L-AS1	antisense	DiffExprLncRNA
ENSG00000189275.3	12.8046	5.71605	1.66703	3.42888	0.000606085	0.0039662	LINC01164	lincRNA	DiffExprLncRNA
ENSG00000255328.1	27.8855	-3.32184	0.794567	-4.18069	2.90621e-05	0.000268183	AC136475.5	lincRNA	DiffExprLncRNA
ENSG00000247095.2	74.4421	2.2858	0.510857	4.47444	7.66107e-06	8.09384e-05	MIR210HG	lincRNA	DiffExprLncRNA
ENSG00000285581.1	29.0733	1.78698	0.667398	2.67753	0.00741664	0.0328461	AC091196.1	lincRNA	DiffExprLncRNA
ENSG00000226416.1	308.688	4.17958	0.368782	11.3335	8.9585e-30	9.01405e-28	MRPL23-AS1	antisense	DiffExprLncRNA
ENSG00000269821.1	42836.7	1.55683	0.233146	6.67747	2.431e-11	5.9894e-10	KCNQ1OT1	antisense	DiffExprLncRNA
ENSG00000224513.2	4.26431	5.60664	2.11902	2.64587	0.00814823	0.0355602	AC109309.1	antisense	DiffExprLncRNA
ENSG00000254757.1	26.5505	8.24843	1.58052	5.21882	1.80071e-07	2.59284e-06	AC127526.1	lincRNA	DiffExprLncRNA
ENSG00000251381.7	849.874	2.12342	0.329437	6.44559	1.1515e-10	2.62373e-09	LINC00958	lincRNA	DiffExprLncRNA
ENSG00000254418.1	30.9671	2.01148	0.649198	3.09841	0.00194563	0.0106954	SPON1-AS1	antisense	DiffExprLncRNA
ENSG00000260196.1	455.191	-1.84604	0.35307	-5.22853	1.70859e-07	2.46584e-06	AC124798.1	antisense	DiffExprLncRNA
ENSG00000245573.8	74.1009	1.62863	0.459626	3.54338	0.000395036	0.00272474	BDNF-AS	processed_transcript	DiffExprLncRNA
ENSG00000245571.6	197.115	-1.53416	0.337314	-4.54816	5.41164e-06	5.89307e-05	FAM111A-DT	lincRNA	DiffExprLncRNA
ENSG00000229719.5	709.482	2.72855	0.291007	9.37625	6.8364e-21	3.92624e-19	MIR194-2HG	lincRNA	DiffExprLncRNA
ENSG00000245532.8	157492	1.9762	0.238279	8.29366	1.09813e-16	4.7463e-15	NEAT1	lincRNA	DiffExprLncRNA
ENSG00000255120.5	22.6363	8.0169	1.60753	4.98709	6.12955e-07	8.00981e-06	OVOL1-AS1	antisense	DiffExprLncRNA
ENSG00000255468.7	427.263	-2.07139	0.311617	-6.64724	2.98638e-11	7.27224e-10	AP001107.9	antisense	DiffExprLncRNA
ENSG00000254447.3	11.2074	5.54219	1.70004	3.26004	0.00111397	0.00668621	OR7E11P	processed_transcript	DiffExprLncRNA
ENSG00000255306.1	135.175	1.09359	0.397092	2.75399	0.00588735	0.027104	AC004923.4	antisense	DiffExprLncRNA
ENSG00000285933.1	9.57105	3.61972	1.29054	2.8048	0.00503479	0.0238423	AP003498.2	lincRNA	DiffExprLncRNA
ENSG00000248671.7	140.887	2.79071	0.395975	7.04768	1.81923e-12	5.08475e-11	AP002495.1	processed_transcript	DiffExprLncRNA
ENSG00000255100.1	47.7534	1.4088	0.535095	2.6328	0.00846846	0.0367981	AP003119.2	antisense	DiffExprLncRNA
ENSG00000255005.1	31.7911	-2.17168	0.691762	-3.13935	0.00169321	0.00953912	AP003128.1	antisense	DiffExprLncRNA
ENSG00000250303.3	136.884	1.12546	0.371905	3.02621	0.00247644	0.0131174	AP002884.1	lincRNA	DiffExprLncRNA
ENSG00000255435.6	36.3082	1.89774	0.611359	3.10414	0.00190833	0.0105378	AP001267.3	antisense	DiffExprLncRNA
ENSG00000254561.3	99.6329	5.90315	0.684946	8.61842	6.78866e-18	3.15654e-16	AP003393.1	antisense	DiffExprLncRNA
ENSG00000254905.1	24.2745	-2.12232	0.787733	-2.69422	0.0070554	0.0315081	AP001318.1	antisense	DiffExprLncRNA
ENSG00000255062.1	79.5951	-1.80192	0.446378	-4.03676	5.41951e-05	0.000472212	AP001318.2	antisense	DiffExprLncRNA
ENSG00000249695.6	7.51218	3.8908	1.5006	2.59282	0.00951914	0.0405644	AC026369.1	antisense	DiffExprLncRNA
ENSG00000236908.2	8.80351	6.65654	1.79503	3.70832	0.000208637	0.00154999	AC005865.1	lincRNA	DiffExprLncRNA
ENSG00000256654.3	85.7355	4.43973	0.540549	8.21337	2.15057e-16	9.00126e-15	AC005906.2	processed_transcript	DiffExprLncRNA
ENSG00000272173.1	20.0519	-3.84782	0.958182	-4.01575	5.92572e-05	0.00051136	U47924.2	antisense	DiffExprLncRNA
ENSG00000249790.2	54.6893	-3.03631	0.559621	-5.42566	5.7742e-08	8.96052e-07	AC092490.1	lincRNA	DiffExprLncRNA
ENSG00000284634.1	116.378	-1.35974	0.382431	-3.55552	0.000377228	0.00261482	AC092821.3	processed_transcript	DiffExprLncRNA
ENSG00000245648.1	221.503	3.63133	0.359912	10.0895	6.14768e-24	4.38087e-22	AC022075.1	antisense	DiffExprLncRNA
ENSG00000180861.9	6.04198	-5.9817	1.93694	-3.08823	0.00201354	0.011011	LINC01559	lincRNA	DiffExprLncRNA
ENSG00000255745.1	138.232	2.50722	0.41416	6.05375	1.41509e-09	2.81395e-08	AC023796.1	lincRNA	DiffExprLncRNA
ENSG00000246695.7	58.0597	-2.04381	0.554175	-3.68802	0.000226005	0.00166525	RASSF8-AS1	antisense	DiffExprLncRNA
ENSG00000245614.3	93.8041	-2.21915	0.453815	-4.88998	1.00845e-06	1.26207e-05	DDX11-AS1	antisense	DiffExprLncRNA
ENSG00000276136.1	16.7145	-2.27072	0.874646	-2.59616	0.00942719	0.0402479	AC016957.2	lincRNA	DiffExprLncRNA
ENSG00000257261.5	616.413	1.05613	0.268022	3.94044	8.13314e-05	0.000675483	AC008014.1	lincRNA	DiffExprLncRNA
ENSG00000272369.1	139.316	1.22682	0.392994	3.12171	0.00179801	0.0100196	AC008035.1	lincRNA	DiffExprLncRNA
ENSG00000268069.2	47.7015	4.27873	0.69294	6.17474	6.62706e-10	1.38458e-08	AC004466.1	antisense	DiffExprLncRNA
ENSG00000276691.1	10.8974	5.47797	1.70098	3.22049	0.00127972	0.00753369	AC004466.3	antisense	DiffExprLncRNA
ENSG00000257985.1	22.0788	7.98262	1.60264	4.98092	6.32815e-07	8.25218e-06	AC004801.4	antisense	DiffExprLncRNA
ENSG00000257913.2	115.911	-1.87318	0.407876	-4.59253	4.37901e-06	4.86976e-05	DDN-AS1	antisense	DiffExprLncRNA
ENSG00000258057.5	30.3423	1.77921	0.641651	2.77287	0.00555646	0.0258312	BCDIN3D-AS1	antisense	DiffExprLncRNA
ENSG00000258279.3	6.90805	4.83163	1.83847	2.62807	0.00858715	0.0372302	LINC00592	lincRNA	DiffExprLncRNA
ENSG00000249641.2	40.9916	6.43371	1.15703	5.56054	2.6894e-08	4.42459e-07	HOXC13-AS	antisense	DiffExprLncRNA
ENSG00000257354.2	211.598	-1.32551	0.41107	-3.22455	0.00126172	0.00745038	AC048341.1	lincRNA	DiffExprLncRNA
ENSG00000275180.1	105.282	-1.46908	0.404998	-3.62738	0.000286317	0.00205545	AC048341.2	lincRNA	DiffExprLncRNA
ENSG00000274979.1	2609.73	-1.09864	0.287102	-3.82664	0.000129902	0.0010202	AC020656.2	lincRNA	DiffExprLncRNA
ENSG00000270344.2	249.065	-1.96215	0.328507	-5.97293	2.33026e-09	4.47806e-08	POC1B-AS1	antisense	DiffExprLncRNA
ENSG00000271614.1	40.7375	-2.22667	0.592854	-3.75586	0.000172749	0.00130941	ATP2B1-AS1	lincRNA	DiffExprLncRNA
ENSG00000257345.2	368.088	-2.16146	0.337936	-6.39606	1.59437e-10	3.57772e-09	LINC02413	lincRNA	DiffExprLncRNA
ENSG00000246985.7	52.9505	-1.68731	0.51892	-3.25158	0.00114766	0.00685895	SOCS2-AS1	processed_transcript	DiffExprLncRNA
ENSG00000257167.2	317.95	-1.87643	0.305607	-6.14	8.25208e-10	1.70288e-08	TMPO-AS1	antisense	DiffExprLncRNA
ENSG00000249550.6	226.257	-1.5634	0.356417	-4.38644	1.1522e-05	0.000115981	LINC01234	lincRNA	DiffExprLncRNA
ENSG00000257817.1	33.39	3.87642	0.756609	5.12342	3.00046e-07	4.13491e-06	AC026765.2	lincRNA	DiffExprLncRNA
ENSG00000257683.1	56.1859	2.37475	0.522063	4.54878	5.39576e-06	5.87959e-05	LINC02463	lincRNA	DiffExprLncRNA
ENSG00000248008.2	250.886	1.57823	0.317946	4.96384	6.91135e-07	8.92938e-06	NRAV	antisense	DiffExprLncRNA
ENSG00000241388.5	355.511	-1.43748	0.290813	-4.94297	7.69432e-07	9.87e-06	HNF1A-AS1	processed_transcript	DiffExprLncRNA
ENSG00000256742.1	80.9264	-1.77301	0.464733	-3.81511	0.000136125	0.00106342	AC145422.1	lincRNA	DiffExprLncRNA
ENSG00000256092.2	157.64	-1.89796	0.392609	-4.83421	1.33677e-06	1.62055e-05	AC137767.1	lincRNA	DiffExprLncRNA
ENSG00000249267.6	24.2325	2.64229	0.755139	3.49908	0.000466865	0.00315021	LINC00939	lincRNA	DiffExprLncRNA
ENSG00000256128.5	8.22288	-4.92393	1.78529	-2.75806	0.00581452	0.026808	LINC00944	lincRNA	DiffExprLncRNA
ENSG00000274373.1	41.1056	2.18752	0.612819	3.56961	0.000357519	0.00249955	AC148476.1	lincRNA	DiffExprLncRNA
ENSG00000274317.1	485.296	8.40457	0.653835	12.8543	8.13844e-38	1.21859e-35	LINC02334	lincRNA	DiffExprLncRNA
ENSG00000223685.5	66.3496	1.75927	0.488162	3.60387	0.000313513	0.00223032	LINC00571	lincRNA	DiffExprLncRNA
ENSG00000215483.10	337.597	-1.57434	0.310776	-5.06585	4.06591e-07	5.48407e-06	LINC00598	lincRNA	DiffExprLncRNA
ENSG00000274270.1	33.7772	-2.03547	0.643365	-3.16379	0.00155728	0.00889498	AL137060.1	sense_intronic	DiffExprLncRNA
ENSG00000280734.2	223.393	-1.0238	0.333963	-3.06562	0.00217218	0.0117407	LINC01232	processed_transcript	DiffExprLncRNA
ENSG00000275880.1	50.3621	1.43016	0.522664	2.73628	0.00621381	0.0283887	AL139385.1	antisense	DiffExprLncRNA
ENSG00000233695.2	691.637	8.69701	0.608409	14.2947	2.36217e-46	5.45142e-44	GAS6-AS1	antisense	DiffExprLncRNA
ENSG00000258458.6	151.221	-1.09066	0.358936	-3.03859	0.0023769	0.0126756	AL160314.2	processed_transcript	DiffExprLncRNA
ENSG00000258457.5	265.116	1.75235	0.311245	5.63013	1.80076e-08	3.06068e-07	AL132780.2	antisense	DiffExprLncRNA
ENSG00000258474.1	105.88	-2.47298	0.422648	-5.85116	4.88143e-09	9.06216e-08	LINC02313	lincRNA	DiffExprLncRNA
ENSG00000258897.1	29.3395	4.90441	0.941299	5.21025	1.88582e-07	2.70763e-06	EGLN3-AS1	antisense	DiffExprLncRNA
ENSG00000258738.1	331.896	-1.01284	0.300454	-3.37103	0.000748879	0.00476792	AL121603.2	antisense	DiffExprLncRNA
ENSG00000258616.5	125.835	8.03846	1.10442	7.27843	3.37721e-13	1.03729e-11	LINC02303	lincRNA	DiffExprLncRNA
ENSG00000258592.1	22.0192	3.85288	0.915055	4.21055	2.54755e-05	0.000239118	AL391152.1	lincRNA	DiffExprLncRNA
ENSG00000254718.6	20.2055	2.75967	0.82063	3.36286	0.000771381	0.00489231	AL157756.1	antisense	DiffExprLncRNA
ENSG00000274015.1	29.0303	-1.8223	0.667561	-2.72979	0.00633752	0.0288178	AL136038.5	lincRNA	DiffExprLncRNA
ENSG00000269927.1	4.87107	-5.66992	2.04163	-2.77715	0.00548375	0.0255736	AC004817.3	lincRNA	DiffExprLncRNA
ENSG00000258813.2	28.5637	-1.84989	0.665954	-2.77781	0.00547274	0.0255459	AL442663.3	antisense	DiffExprLncRNA
ENSG00000285966.1	16.7435	2.41351	0.889037	2.71475	0.00663258	0.0299001	AC007686.4	lincRNA	DiffExprLncRNA
ENSG00000258602.1	368.115	6.51511	0.461745	14.1098	3.30723e-45	7.11055e-43	LINC01629	lincRNA	DiffExprLncRNA
ENSG00000259163.1	11.923	7.09398	1.71346	4.14016	3.47062e-05	0.000316202	AL096869.2	antisense	DiffExprLncRNA
ENSG00000258572.1	10.9973	5.51737	1.70329	3.23924	0.00119848	0.00712545	AL133467.1	lincRNA	DiffExprLncRNA
ENSG00000247092.6	572.057	-1.17171	0.29867	-3.92308	8.74234e-05	0.000720792	SNHG10	antisense	DiffExprLncRNA
ENSG00000258383.1	10.7457	6.94241	1.74354	3.98179	6.83984e-05	0.000580682	AL132819.1	lincRNA	DiffExprLncRNA
ENSG00000258498.8	21.0963	2.55238	0.792138	3.22214	0.00127236	0.00750089	DIO3OS	lincRNA	DiffExprLncRNA
ENSG00000260285.1	94.1499	1.44111	0.417183	3.45439	0.000551539	0.0036472	AL133367.1	antisense	DiffExprLncRNA
ENSG00000258534.1	57.9364	1.49929	0.550563	2.7232	0.00646531	0.0292772	AL132712.1	lincRNA	DiffExprLncRNA
ENSG00000258593.2	21.1347	2.25669	0.81473	2.76986	0.00560808	0.0260231	AL583810.1	lincRNA	DiffExprLncRNA
ENSG00000278626.1	80.3751	7.39852	1.10792	6.67782	2.42522e-11	5.98101e-10	AC023310.4	lincRNA	DiffExprLncRNA
ENSG00000260409.1	20.6694	3.09523	0.856667	3.61311	0.000302551	0.00216212	AC012414.5	lincRNA	DiffExprLncRNA
ENSG00000247765.2	21.9543	3.19087	0.839102	3.80272	0.000143116	0.00111251	AC068446.2	lincRNA	DiffExprLncRNA
ENSG00000224078.14	10944.3	-1.43457	0.246903	-5.81027	6.23738e-09	1.13779e-07	SNHG14	processed_transcript	DiffExprLncRNA
ENSG00000225930.4	292.838	1.05355	0.303007	3.47699	0.000507076	0.00338432	LINC02249	lincRNA	DiffExprLncRNA
ENSG00000259418.1	12.194	4.62431	1.3772	3.35777	0.000785743	0.00496119	AC091117.2	antisense	DiffExprLncRNA
ENSG00000259488.2	97.1691	-1.5125	0.435011	-3.47692	0.000507217	0.00338436	AC023355.1	antisense	DiffExprLncRNA
ENSG00000274528.1	28.6561	-1.92024	0.672211	-2.8566	0.00428207	0.0208508	AC090970.2	sense_intronic	DiffExprLncRNA
ENSG00000259178.1	64.6625	7.09427	1.11854	6.34246	2.26128e-10	5.00287e-09	AC023906.2	lincRNA	DiffExprLncRNA
ENSG00000259727.1	14.7457	-3.34394	1.05062	-3.18283	0.00145845	0.00840486	AC103740.2	lincRNA	DiffExprLncRNA
ENSG00000259248.6	73.3702	1.21687	0.44562	2.73073	0.00631942	0.0287615	USP3-AS1	antisense	DiffExprLncRNA
ENSG00000274383.1	65.0834	1.59541	0.473443	3.3698	0.000752218	0.00478676	AC103691.1	antisense	DiffExprLncRNA
ENSG00000259471.1	25.9325	2.16682	0.70161	3.08835	0.00201273	0.011009	LINC01169	lincRNA	DiffExprLncRNA
ENSG00000259426.5	25.3649	-2.46866	0.730418	-3.37979	0.000725399	0.00464311	AC027237.3	antisense	DiffExprLncRNA
ENSG00000246877.1	77.1237	2.14191	0.509782	4.20162	2.6501e-05	0.000247757	DNM1P35	antisense	DiffExprLncRNA
ENSG00000260288.3	10.1702	3.30959	1.22409	2.70371	0.00685695	0.0307627	AC019294.2	processed_transcript	DiffExprLncRNA
ENSG00000259362.2	100.878	5.90701	0.667594	8.8482	8.89382e-19	4.39537e-17	AC046168.1	lincRNA	DiffExprLncRNA
ENSG00000259291.2	178.946	3.28024	0.39875	8.22629	1.93096e-16	8.13621e-15	ZNF710-AS1	antisense	DiffExprLncRNA
ENSG00000261054.1	60.413	2.85906	0.523021	5.46644	4.59176e-08	7.25538e-07	AC036108.2	antisense	DiffExprLncRNA
ENSG00000228201.1	19.538	3.26781	0.918735	3.55686	0.000375319	0.00260589	AL022341.1	antisense	DiffExprLncRNA
ENSG00000261713.6	333.487	6.13236	0.456331	13.4384	3.60228e-41	6.38137e-39	SSTR5-AS1	processed_transcript	DiffExprLncRNA
ENSG00000260778.5	69.1088	1.37526	0.485071	2.83518	0.00458005	0.0220457	AC009065.4	lincRNA	DiffExprLncRNA
ENSG00000261613.2	31.0985	2.1998	0.678184	3.24366	0.00118006	0.00702786	AC093525.6	antisense	DiffExprLncRNA
ENSG00000269937.1	147.629	2.04393	0.389189	5.25176	1.50651e-07	2.20328e-06	AC093525.7	antisense	DiffExprLncRNA
ENSG00000260565.6	612.254	1.15769	0.280383	4.12897	3.64393e-05	0.000329604	ERVK13-1	processed_transcript	DiffExprLncRNA
ENSG00000205913.6	319.46	2.97044	0.335556	8.8523	8.57353e-19	4.24542e-17	SRRM2-AS1	antisense	DiffExprLncRNA
ENSG00000262312.2	17.6198	-2.38127	0.876545	-2.71666	0.00659442	0.0297601	AC004494.1	antisense	DiffExprLncRNA
ENSG00000259939.1	157.706	1.18975	0.352848	3.37184	0.000746679	0.00475752	AC022167.1	antisense	DiffExprLncRNA
ENSG00000262420.3	66.355	-1.39991	0.467288	-2.99582	0.00273704	0.0142725	AC007613.1	antisense	DiffExprLncRNA
ENSG00000277369.1	148.491	1.09862	0.391955	2.80292	0.00506418	0.0239679	AC010654.1	lincRNA	DiffExprLncRNA
ENSG00000262454.3	262.605	1.41368	0.306058	4.61899	3.8561e-06	4.32843e-05	MIR193BHG	lincRNA	DiffExprLncRNA
ENSG00000260009.1	50.6147	3.73027	0.610118	6.11401	9.71556e-10	1.97571e-08	LINC02130	lincRNA	DiffExprLncRNA
ENSG00000263335.1	66.1311	1.16383	0.46251	2.51634	0.0118581	0.0485656	AF001548.2	antisense	DiffExprLncRNA
ENSG00000261357.1	132.61	2.75837	0.449325	6.13893	8.30776e-10	1.71156e-08	AC099518.2	lincRNA	DiffExprLncRNA
ENSG00000263331.1	50.4308	-1.84068	0.543197	-3.3886	0.0007025	0.00451954	AC008551.1	antisense	DiffExprLncRNA
ENSG00000275441.1	23.9324	-2.15418	0.768405	-2.80345	0.00505598	0.0239336	AC020765.2	antisense	DiffExprLncRNA
ENSG00000277999.1	94.3734	2.86988	0.469314	6.11505	9.65259e-10	1.96608e-08	AC009093.6	lincRNA	DiffExprLncRNA
ENSG00000198106.8	30.1814	3.44289	0.767944	4.48326	7.35123e-06	7.81904e-05	AC025279.1	processed_transcript	DiffExprLncRNA
ENSG00000250616.2	50.5978	-1.65912	0.518938	-3.19714	0.00138799	0.00805978	AC012645.1	antisense	DiffExprLncRNA
ENSG00000260852.1	489.104	-1.11997	0.307365	-3.64377	0.000268678	0.00193949	FBXL19-AS1	antisense	DiffExprLncRNA
ENSG00000261359.2	46.0202	2.77989	0.580602	4.78795	1.68494e-06	2.00685e-05	PYCARD-AS1	antisense	DiffExprLncRNA
ENSG00000260605.1	44.0024	-3.86532	0.683346	-5.65646	1.5453e-08	2.65338e-07	AC027688.1	lincRNA	DiffExprLncRNA
ENSG00000260620.1	18.4275	-4.06699	1.02774	-3.95722	7.58286e-05	0.000635611	AC027688.2	lincRNA	DiffExprLncRNA
ENSG00000249231.7	18.4947	-3.69574	1.02929	-3.59055	0.000329975	0.00232964	CASC16	lincRNA	DiffExprLncRNA
ENSG00000260963.1	73.088	-4.18114	0.587704	-7.11436	1.12436e-12	3.22134e-11	AC026462.3	lincRNA	DiffExprLncRNA
ENSG00000261804.1	156.013	8.35996	1.08445	7.70892	1.26883e-14	4.42071e-13	AC007342.4	lincRNA	DiffExprLncRNA
ENSG00000262714.1	200.416	6.90237	0.65141	10.596	3.10837e-26	2.65054e-24	AC007342.5	lincRNA	DiffExprLncRNA
ENSG00000245694.9	52.6768	2.75157	0.594007	4.63222	3.61765e-06	4.07715e-05	CRNDE	lincRNA	DiffExprLncRNA
ENSG00000276131.1	41.7307	-1.89323	0.613962	-3.08362	0.00204497	0.0111634	AC009118.2	antisense	DiffExprLncRNA
ENSG00000246898.1	149.333	-2.22854	0.392827	-5.67308	1.40249e-08	2.42139e-07	LINC00920	lincRNA	DiffExprLncRNA
ENSG00000275383.1	23.3863	2.09028	0.737081	2.83589	0.00456977	0.0220089	AC126773.4	lincRNA	DiffExprLncRNA
ENSG00000261348.1	13.3103	7.2518	1.69082	4.28892	1.79543e-05	0.000174043	LINC02136	lincRNA	DiffExprLncRNA
ENSG00000261170.1	18.8675	2.50301	0.8436	2.96706	0.00300665	0.0154446	AC009053.3	antisense	DiffExprLncRNA
ENSG00000274220.1	68.5265	-1.46021	0.46611	-3.13275	0.00173177	0.00971945	AC009163.6	lincRNA	DiffExprLncRNA
ENSG00000279622.2	15.5505	-2.71473	0.935585	-2.90164	0.00371216	0.0184946	AC025280.2	antisense	DiffExprLncRNA
ENSG00000278214.1	43.4822	2.78222	0.600499	4.63318	3.60087e-06	4.06188e-05	LINC02139	lincRNA	DiffExprLncRNA
ENSG00000261273.1	13.3754	4.20386	1.23384	3.40713	0.000656487	0.0042485	AC138512.1	lincRNA	DiffExprLncRNA
ENSG00000260121.1	29.5363	2.1183	0.701047	3.02163	0.00251419	0.0132699	AC138028.4	antisense	DiffExprLncRNA
ENSG00000224888.4	20.8835	3.54121	0.880628	4.02123	5.78939e-05	0.00050097	AC138028.2	antisense	DiffExprLncRNA
ENSG00000261373.1	31.4374	5.45937	1.03643	5.2675	1.38292e-07	2.03673e-06	VPS9D1-AS1	antisense	DiffExprLncRNA
ENSG00000260528.4	195.91	1.18731	0.326062	3.64137	0.000271186	0.00195632	FAM157C	lincRNA	DiffExprLncRNA
ENSG00000262558.1	33.7853	-1.87151	0.625476	-2.99214	0.00277028	0.0144219	AC129507.3	antisense	DiffExprLncRNA
ENSG00000186594.14	779.549	1.13093	0.265396	4.26131	2.03237e-05	0.000194167	MIR22HG	lincRNA	DiffExprLncRNA
ENSG00000262445.3	163.307	2.01614	0.377667	5.33842	9.37588e-08	1.40974e-06	AC099684.2	antisense	DiffExprLncRNA
ENSG00000228133.2	34.0644	2.71748	0.650847	4.1753	2.97596e-05	0.000273813	AC099684.1	antisense	DiffExprLncRNA
ENSG00000262903.1	220.994	2.1761	0.358956	6.06232	1.34173e-09	2.68292e-08	AC027796.4	antisense	DiffExprLncRNA
ENSG00000267532.5	22.5218	-3.11958	0.821813	-3.79598	0.000147064	0.00113933	MIR497HG	antisense	DiffExprLncRNA
ENSG00000178977.3	282.278	3.21395	0.348031	9.23467	2.59076e-20	1.42918e-18	LINC00324	lincRNA	DiffExprLncRNA
ENSG00000196893.3	16.0673	-5.9456	1.72044	-3.45585	0.000548556	0.00362938	AC090286.1	antisense	DiffExprLncRNA
ENSG00000262769.1	9.67373	-4.13977	1.42064	-2.91402	0.00356809	0.0179116	AC025627.1	antisense	DiffExprLncRNA
ENSG00000276399.1	5.75404	6.04154	1.95377	3.09225	0.00198643	0.0108888	AC209154.1	lincRNA	DiffExprLncRNA
ENSG00000267321.2	314.694	-1.23534	0.328718	-3.75805	0.000171244	0.00129944	LINC02001	lincRNA	DiffExprLncRNA
ENSG00000277969.1	281.527	-2.38009	0.313422	-7.59388	3.10478e-14	1.04413e-12	AC006449.6	lincRNA	DiffExprLncRNA
ENSG00000266469.1	34.2042	1.97259	0.653485	3.01857	0.00253975	0.0133767	AC005288.1	antisense	DiffExprLncRNA
ENSG00000266208.1	814.797	1.87428	0.293232	6.3918	1.63945e-10	3.6756e-09	AC080112.1	antisense	DiffExprLncRNA
ENSG00000197291.8	122.098	-2.43667	0.396438	-6.14641	7.92551e-10	1.63818e-08	RAMP2-AS1	lincRNA	DiffExprLncRNA
ENSG00000224505.2	97.8051	2.30171	0.472945	4.86676	1.13442e-06	1.4009e-05	AC138150.1	antisense	DiffExprLncRNA
ENSG00000244649.4	473.743	7.25819	0.491759	14.7596	2.66717e-49	6.8462e-47	LINC02086	lincRNA	DiffExprLncRNA
ENSG00000249906.1	33.8454	4.10445	0.812838	5.04953	4.4289e-07	5.93864e-06	AC006487.1	antisense	DiffExprLncRNA
ENSG00000246640.1	9.31693	4.21639	1.46504	2.878	0.00400206	0.0197202	PICART1	lincRNA	DiffExprLncRNA
ENSG00000250286.1	204.104	2.23576	0.353997	6.31576	2.68836e-10	5.90103e-09	AC021491.2	processed_transcript	DiffExprLncRNA
ENSG00000247011.2	97.2629	1.77714	0.418843	4.24297	2.20583e-05	0.000209151	AC005920.1	lincRNA	DiffExprLncRNA
ENSG00000265148.5	74.0944	-2.06697	0.461351	-4.48024	7.4558e-06	7.90019e-05	TSPOAP1-AS1	antisense	DiffExprLncRNA
ENSG00000264672.5	25.2684	5.12085	1.05422	4.85747	1.18894e-06	1.45891e-05	SEPT4-AS1	antisense	DiffExprLncRNA
ENSG00000224738.1	40.5263	-2.47529	0.604774	-4.09293	4.25964e-05	0.000379566	AC099850.1	antisense	DiffExprLncRNA
ENSG00000267248.2	66.8835	-1.77778	0.488958	-3.63585	0.000277062	0.00199585	AC025048.2	processed_transcript	DiffExprLncRNA
ENSG00000259349.1	70.3664	1.63232	0.463636	3.52069	0.000430418	0.00293897	AC011921.1	antisense	DiffExprLncRNA
ENSG00000187013.4	31.7706	2.67661	0.670267	3.99334	6.51489e-05	0.000555721	C17orf82	lincRNA	DiffExprLncRNA
ENSG00000263489.1	4.2293	5.59586	2.11236	2.6491	0.00807058	0.0352939	AC127029.2	lincRNA	DiffExprLncRNA
ENSG00000266402.3	46.7106	-1.65272	0.565503	-2.92256	0.00347169	0.0175046	SNHG25	lincRNA	DiffExprLncRNA
ENSG00000278730.1	1507.58	1.12144	0.25022	4.4818	7.40159e-06	7.85931e-05	AC005332.6	lincRNA	DiffExprLncRNA
ENSG00000274561.1	130.418	1.32777	0.426847	3.11065	0.00186675	0.0103318	AC005332.3	lincRNA	DiffExprLncRNA
ENSG00000277728.1	459.714	4.68917	0.328494	14.2748	3.14282e-46	7.05871e-44	AC097641.2	antisense	DiffExprLncRNA
ENSG00000177338.13	180.156	8.56894	1.07327	7.98393	1.41747e-15	5.46042e-14	LINC00469	lincRNA	DiffExprLncRNA
ENSG00000265342.1	18.5951	2.46148	0.879462	2.79885	0.00512848	0.0242338	AC011933.3	antisense	DiffExprLncRNA
ENSG00000267128.1	380.125	5.3327	0.369143	14.4462	2.64981e-47	6.22953e-45	RNF157-AS1	antisense	DiffExprLncRNA
ENSG00000267719.1	22.8621	5.58623	1.23428	4.5259	6.01379e-06	6.49536e-05	LINC02078	lincRNA	DiffExprLncRNA
ENSG00000263069.5	83.2713	-1.16718	0.442331	-2.63871	0.00832229	0.0362255	AC124319.3	antisense	DiffExprLncRNA
ENSG00000261924.1	240.328	7.98313	0.788386	10.1259	4.24007e-24	3.07374e-22	AC127496.1	antisense	DiffExprLncRNA
ENSG00000263167.1	6.10552	-6.00538	1.96886	-3.05018	0.00228707	0.0122746	AC115099.1	antisense	DiffExprLncRNA
ENSG00000185168.5	68.0232	4.38731	0.607368	7.22347	5.06773e-13	1.51041e-11	LINC00482	lincRNA	DiffExprLncRNA
ENSG00000262877.4	38.4867	2.32642	0.66474	3.49974	0.000465705	0.00314492	AC110285.2	lincRNA	DiffExprLncRNA
ENSG00000264575.1	200.968	-1.3639	0.353747	-3.85558	0.000115454	0.000921984	LINC00526	lincRNA	DiffExprLncRNA
ENSG00000265933.5	90.5003	-2.78292	0.467485	-5.95297	2.63322e-09	5.02569e-08	LINC00668	lincRNA	DiffExprLncRNA
ENSG00000266767.1	19.0675	2.55282	0.84907	3.00661	0.00264178	0.0138359	AP000897.2	antisense	DiffExprLncRNA
ENSG00000272703.1	5.12774	-5.7437	2.02023	-2.8431	0.00446772	0.0215918	AP005137.2	antisense	DiffExprLncRNA
ENSG00000283294.1	172.609	3.52607	0.432328	8.156	3.4629e-16	1.41641e-14	AP005212.4	processed_transcript	DiffExprLncRNA
ENSG00000266010.2	20.0188	-5.23672	1.25186	-4.18315	2.87492e-05	0.000265682	GATA6-AS1	antisense	DiffExprLncRNA
ENSG00000278464.1	55.646	-3.07562	0.566789	-5.42639	5.75053e-08	8.92929e-07	AC068506.1	lincRNA	DiffExprLncRNA
ENSG00000267677.1	12.0479	-3.08408	1.11689	-2.7613	0.00575718	0.0265826	AC016229.2	lincRNA	DiffExprLncRNA
ENSG00000260457.2	5.40914	5.94813	2.03482	2.92318	0.00346477	0.0174732	AC027458.1	lincRNA	DiffExprLncRNA
ENSG00000275763.3	22.6787	-2.12392	0.780535	-2.72111	0.00650628	0.0294204	C18orf65	lincRNA	DiffExprLncRNA
ENSG00000282393.1	50.9816	1.77786	0.547306	3.24838	0.00116064	0.00692336	AC016588.2	lincRNA	DiffExprLncRNA
ENSG00000267751.5	73.9314	-2.1403	0.541558	-3.95212	7.74606e-05	0.000647564	AC009005.1	antisense	DiffExprLncRNA
ENSG00000267493.3	19.4061	-3.52429	0.962769	-3.66058	0.000251647	0.00182953	CIRBP-AS1	antisense	DiffExprLncRNA
ENSG00000267317.2	204.658	1.87354	0.340953	5.49501	3.90697e-08	6.2519e-07	AC027307.2	antisense	DiffExprLncRNA
ENSG00000267073.1	26.0266	2.42671	0.804289	3.01721	0.00255116	0.0134284	AC005256.1	lincRNA	DiffExprLncRNA
ENSG00000267283.1	48.0082	2.04182	0.549263	3.71738	0.0002013	0.00150125	AC005306.1	processed_transcript	DiffExprLncRNA
ENSG00000267551.3	43.8218	7.52002	1.50661	4.99135	5.99587e-07	7.83919e-06	AC005264.1	antisense	DiffExprLncRNA
ENSG00000269318.1	42.5162	2.3043	0.605559	3.80525	0.000141662	0.00110257	AC007292.2	antisense	DiffExprLncRNA
ENSG00000269386.5	191.397	-1.09969	0.354337	-3.10352	0.00191232	0.0105561	RAB11B-AS1	antisense	DiffExprLncRNA
ENSG00000267106.6	208.29	1.24605	0.356254	3.49763	0.000469405	0.00316395	ZNF561-AS1	processed_transcript	DiffExprLncRNA
ENSG00000266904.5	80.6344	3.83459	0.531117	7.21987	5.20367e-13	1.54909e-11	LINC00663	lincRNA	DiffExprLncRNA
ENSG00000267296.2	124.396	1.78837	0.410192	4.35983	1.30162e-05	0.000129416	CEBPA-DT	antisense	DiffExprLncRNA
ENSG00000267757.4	30.2894	2.22595	0.688546	3.23283	0.00122572	0.00727366	EML2-AS1	processed_transcript	DiffExprLncRNA
ENSG00000268001.1	45.707	-2.53436	0.57077	-4.44025	8.9855e-06	9.30548e-05	CARD8-AS1	antisense	DiffExprLncRNA
ENSG00000268108.1	177.205	9.54311	1.45478	6.55985	5.38619e-11	1.27941e-09	AC008687.2	antisense	DiffExprLncRNA
ENSG00000268287.1	179.076	8.55462	1.07182	7.98136	1.44728e-15	5.55824e-14	AC008687.3	lincRNA	DiffExprLncRNA
ENSG00000275055.1	73.2874	-1.4106	0.451874	-3.12165	0.00179839	0.0100196	AC011468.5	antisense	DiffExprLncRNA
ENSG00000267577.1	11.1542	3.05945	1.12687	2.71501	0.00662732	0.0298871	AC010327.3	antisense	DiffExprLncRNA
ENSG00000268654.2	114.879	-1.47374	0.404175	-3.6463	0.000266044	0.00192364	MIMT1	lincRNA	DiffExprLncRNA
ENSG00000268516.2	126.804	-1.05043	0.381407	-2.75408	0.00588566	0.0271012	AC020915.3	antisense	DiffExprLncRNA
ENSG00000277287.1	595.582	4.73532	0.317638	14.9079	2.92802e-50	8.0059e-48	AL109976.1	lincRNA	DiffExprLncRNA
ENSG00000227906.7	118.48	-3.79158	0.449658	-8.43215	3.39361e-17	1.51091e-15	SNAP25-AS1	antisense	DiffExprLncRNA
ENSG00000179935.9	64.522	-2.80829	0.511118	-5.49441	3.92025e-08	6.26916e-07	LINC00652	lincRNA	DiffExprLncRNA
ENSG00000275457.1	172.609	-1.31	0.355201	-3.68806	0.000225969	0.00166525	AL117332.1	antisense	DiffExprLncRNA
ENSG00000213742.6	616.507	1.91528	0.273468	7.00369	2.49312e-12	6.87657e-11	ZNF337-AS1	antisense	DiffExprLncRNA
ENSG00000278383.1	72.539	1.48552	0.467096	3.18034	0.00147103	0.00846576	AL031673.1	antisense	DiffExprLncRNA
ENSG00000175170.15	369.638	4.24405	0.332275	12.7727	2.32912e-37	3.34794e-35	FAM182B	lincRNA	DiffExprLncRNA
ENSG00000277692.1	18.9234	2.25583	0.822632	2.74221	0.00610269	0.0279522	AL121583.1	lincRNA	DiffExprLncRNA
ENSG00000277301.1	44.7367	3.37347	0.640401	5.26774	1.38111e-07	2.03526e-06	AL034550.2	antisense	DiffExprLncRNA
ENSG00000275223.1	105.456	-1.38745	0.433547	-3.20024	0.00137313	0.00798451	AL121906.2	lincRNA	DiffExprLncRNA
ENSG00000269846.1	24.4272	-2.21479	0.745798	-2.96969	0.00298097	0.0153425	AL136172.1	antisense	DiffExprLncRNA
ENSG00000226143.1	29.2673	-1.97008	0.672415	-2.92986	0.00339119	0.0171503	Z98752.1	antisense	DiffExprLncRNA
ENSG00000226812.2	69.0483	-3.4454	0.565565	-6.09196	1.11539e-09	2.25543e-08	AL117382.1	antisense	DiffExprLncRNA
ENSG00000271984.1	1261.22	7.98768	0.408543	19.5516	3.99686e-85	3.72374e-82	AL008726.1	antisense	DiffExprLncRNA
ENSG00000204044.6	40.1812	-2.69534	0.619112	-4.35355	1.3395e-05	0.000132867	SLC12A5-AS1	antisense	DiffExprLncRNA
ENSG00000236028.1	96.8616	10.1146	1.51521	6.67534	2.4666e-11	6.07117e-10	AL354766.2	lincRNA	DiffExprLncRNA
ENSG00000237595.4	94.0661	1.66409	0.433765	3.83638	0.000124864	0.000986788	LINC01275	lincRNA	DiffExprLncRNA
ENSG00000271774.1	99.4666	1.56975	0.431847	3.63497	0.000278012	0.00200212	AL109930.1	antisense	DiffExprLncRNA
ENSG00000259723.1	195.481	2.18178	0.334903	6.51467	7.28505e-11	1.69838e-09	AL354993.2	antisense	DiffExprLncRNA
ENSG00000233017.2	6.10552	-6.00538	1.96886	-3.05018	0.00228707	0.0122746	AL121832.1	antisense	DiffExprLncRNA
ENSG00000273812.2	4.78422	5.77299	2.05524	2.80892	0.00497084	0.0235921	BX640514.2	lincRNA	DiffExprLncRNA
ENSG00000275620.1	422.05	12.2401	1.47272	8.31125	9.46963e-17	4.09998e-15	AL121827.2	antisense	DiffExprLncRNA
ENSG00000268858.2	1043.79	2.41589	0.315249	7.66344	1.81011e-14	6.22041e-13	AL118506.1	antisense	DiffExprLncRNA
ENSG00000280213.1	44.8095	2.10639	0.559203	3.76678	0.000165369	0.00126018	UCKL1-AS1	antisense	DiffExprLncRNA
ENSG00000275496.4	189.182	-1.12569	0.340712	-3.30393	0.000953413	0.00585954	CU633906.1	lincRNA	DiffExprLncRNA
ENSG00000280145.3	502.62	-1.45637	0.280493	-5.19218	2.07841e-07	2.95214e-06	CU638689.4	lincRNA	DiffExprLncRNA
ENSG00000280018.3	56.9354	-1.633	0.499249	-3.27092	0.00107197	0.00647571	CU634019.6	lincRNA	DiffExprLncRNA
ENSG00000280441.3	27.2188	2.44672	0.711449	3.43906	0.00058373	0.00383187	FP236383.1	lincRNA	DiffExprLncRNA
ENSG00000286033.1	14.5355	2.50944	0.953521	2.63176	0.00849426	0.0368894	CR381670.2	lincRNA	DiffExprLncRNA
ENSG00000232560.6	31.8979	-4.01626	0.840351	-4.77927	1.75934e-06	2.08855e-05	LINC01549	lincRNA	DiffExprLncRNA
ENSG00000260583.1	48.7247	2.14176	0.536646	3.99101	6.57935e-05	0.000560649	AP000223.1	antisense	DiffExprLncRNA
ENSG00000238197.5	82.8695	1.17076	0.423593	2.76389	0.00571166	0.0264247	PAXBP1-AS1	antisense	DiffExprLncRNA
ENSG00000232539.1	4.1943	5.58505	2.10986	2.64712	0.00811815	0.0354412	LINC00945	lincRNA	DiffExprLncRNA
ENSG00000273102.1	21.1236	-2.11437	0.810159	-2.60982	0.00905892	0.0389467	AP000569.1	lincRNA	DiffExprLncRNA
ENSG00000286153.1	45.8439	3.72472	0.672431	5.53919	3.03869e-08	4.94747e-07	AP000331.1	antisense	DiffExprLncRNA
ENSG00000230366.9	105.392	-1.63386	0.40256	-4.05868	4.93517e-05	0.000434222	DSCR9	lincRNA	DiffExprLncRNA
ENSG00000235888.2	74.7154	1.16973	0.46365	2.52288	0.0116398	0.0478585	AF064858.1	lincRNA	DiffExprLncRNA
ENSG00000236384.7	58.4787	-1.5318	0.490622	-3.12216	0.00179531	0.0100091	LINC00479	lincRNA	DiffExprLncRNA
ENSG00000225431.1	7.58868	6.44566	1.85831	3.46855	0.000523267	0.00347933	LINC01671	lincRNA	DiffExprLncRNA
ENSG00000215458.8	499.735	10.044	1.06118	9.4649	2.93834e-21	1.72293e-19	AATBC	antisense	DiffExprLncRNA
ENSG00000227039.6	26.3202	3.93086	0.858373	4.57944	4.66227e-06	5.14835e-05	ITGB2-AS1	antisense	DiffExprLncRNA
ENSG00000224574.1	23.677	2.23858	0.770931	2.90373	0.00368748	0.0184008	COL18A1-AS2	antisense	DiffExprLncRNA
ENSG00000233922.2	345.472	-1.56212	0.294834	-5.29831	1.16882e-07	1.73461e-06	LINC01694	lincRNA	DiffExprLncRNA
ENSG00000271127.1	101.142	1.44384	0.428101	3.37266	0.000744471	0.00474586	AP000526.1	sense_intronic	DiffExprLncRNA
ENSG00000272872.1	119.756	1.66562	0.418231	3.98253	6.81844e-05	0.000579452	AP000525.1	sense_intronic	DiffExprLncRNA
ENSG00000269220.1	339.118	-1.0478	0.316452	-3.31109	0.000929339	0.005734	LINC00528	lincRNA	DiffExprLncRNA
ENSG00000225335.3	77.0797	-1.25822	0.4475	-2.81166	0.00492861	0.0234142	AC016027.1	antisense	DiffExprLncRNA
ENSG00000280007.1	73.932	-2.04273	0.458217	-4.45799	8.27326e-06	8.67141e-05	AC008079.1	antisense	DiffExprLncRNA
ENSG00000274422.1	516.228	1.80944	0.303106	5.96965	2.37756e-09	4.55851e-08	AC245060.5	lincRNA	DiffExprLncRNA
ENSG00000280623.1	42.103	-1.46897	0.581124	-2.52782	0.0114774	0.047338	PCAT14	lincRNA	DiffExprLncRNA
ENSG00000224277.5	15.4016	5.99159	1.63003	3.67575	0.000237147	0.00173565	AP000345.1	antisense	DiffExprLncRNA
ENSG00000218537.1	192.426	1.12766	0.390486	2.88784	0.00387903	0.0191854	MIF-AS1	antisense	DiffExprLncRNA
ENSG00000261188.1	160.216	-1.45803	0.353919	-4.11969	3.79387e-05	0.000341693	Z95115.1	antisense	DiffExprLncRNA
ENSG00000244625.6	36.5514	-1.85447	0.633467	-2.92749	0.00341712	0.017264	MIATNB	lincRNA	DiffExprLncRNA
ENSG00000268812.3	51.1889	6.15877	0.970171	6.34813	2.17945e-10	4.83885e-09	AC004264.1	antisense	DiffExprLncRNA
ENSG00000272720.1	31.187	1.9913	0.667182	2.98465	0.00283904	0.0147037	AL022322.1	lincRNA	DiffExprLncRNA
ENSG00000235513.1	58.3355	5.33345	0.749973	7.11153	1.14764e-12	3.28428e-11	AL035681.1	antisense	DiffExprLncRNA
ENSG00000237037.9	112.879	2.4227	0.412635	5.8713	4.32397e-09	8.06895e-08	NDUFA6-DT	processed_transcript	DiffExprLncRNA
ENSG00000229891.1	13.8263	-2.50187	0.967917	-2.5848	0.00974347	0.0413596	LINC01315	lincRNA	DiffExprLncRNA
ENSG00000197182.14	22.8452	2.5435	0.773371	3.28884	0.001006	0.00613491	MIRLET7BHG	lincRNA	DiffExprLncRNA
ENSG00000234869.1	4.74666	5.77045	2.07681	2.77852	0.00546069	0.0255086	AL021392.1	antisense	DiffExprLncRNA
ENSG00000260708.1	180.55	-1.48862	0.364202	-4.08735	4.3633e-05	0.000387841	AL118516.1	antisense	DiffExprLncRNA
ENSG00000285756.1	1077.94	1.51652	0.251593	6.02768	1.66334e-09	3.27397e-08	BX890604.2	lincRNA	DiffExprLncRNA
ENSG00000224294.1	748.253	13.0656	1.47361	8.86642	7.55353e-19	3.74771e-17	PINCR	lincRNA	DiffExprLncRNA
ENSG00000285899.1	37.6372	6.29269	1.1708	5.3747	7.67106e-08	1.16949e-06	AL023574.1	lincRNA	DiffExprLncRNA
ENSG00000270069.1	437.279	1.42933	0.330628	4.32307	1.53876e-05	0.000151083	MIR222HG	lincRNA	DiffExprLncRNA
ENSG00000269902.1	103.011	1.79069	0.452842	3.95433	7.67495e-05	0.000642474	AC234772.2	lincRNA	DiffExprLncRNA
ENSG00000230844.2	144.67	-1.11673	0.361689	-3.08754	0.00201819	0.0110316	ZNF674-AS1	lincRNA	DiffExprLncRNA
ENSG00000213468.6	826.689	-1.01621	0.260123	-3.90664	9.35874e-05	0.000766089	FIRRE	processed_transcript	DiffExprLncRNA
ENSG00000285018.1	26.2251	3.86537	0.841499	4.59344	4.36008e-06	4.853e-05	AC245140.3	antisense	DiffExprLncRNA
ENSG00000231535.6	40.0891	3.35301	0.658406	5.09262	3.53152e-07	4.79932e-06	LINC00278	lincRNA	DiffExprLncRNA
ENSG00000286050.1	584.948	10.2664	1.05816	9.70214	2.95251e-22	1.84294e-20	AC012078.2	lincRNA	DiffExprLncRNA

## Sheet: 380 overlapped lncRNAs
gene	genename	genetype	baseMean(WT+/WT-)	log2FoldChange(WT+/WT-)	lfcSE(WT+/WT-)	stat(WT+/WT-)	pvalue(WT+/WT-)	padj(WT+/WT-)	baseMean(WT+/KO+)	log2FoldChange(WT+/KO+)	lfcSE(WT+/KO+)	stat(WT+/KO+)	pvalue(WT+/KO+)	padj(WT+/KO+)
ENSG00000225905.1	AL391244.1	antisense	31.8776	2.84867	0.714265	3.98826	6.65605e-05	0.000395977	31.0406	6.01493	1.18915	5.05818	4.23273e-07	5.69686e-06
ENSG00000238164.6	TNFRSF14-AS1	antisense	434.582	3.90784	0.31665	12.3412	5.4322e-35	5.6278e-33	455.4	5.45255	0.391695	13.9204	4.76237e-44	9.58379e-42
ENSG00000236423.5	LINC01134	lincRNA	120.254	-1.66354	0.386654	-4.30241	1.68947e-05	0.000114056	129.287	-1.63506	0.43665	-3.74456	0.000180709	0.00136328
ENSG00000234546.3	LNCTAM34A	lincRNA	130.17	2.28228	0.357048	6.39208	1.63643e-10	2.46887e-09	123.43	4.38518	0.473528	9.26065	2.03187e-20	1.1283e-18
ENSG00000233431.1	LINC02596	antisense	5.98196	5.97577	1.94781	3.06794	0.00215541	0.00859734	6.51641	6.22155	1.90087	3.273	0.00106411	0.00643736
ENSG00000237429.1	BX293535.1	antisense	30.1852	2.27792	0.660165	3.45053	0.000559493	0.00264616	27.7913	5.83041	1.19535	4.87759	1.07388e-06	1.33333e-05
ENSG00000197989.14	SNHG12	antisense	981.824	-1.19426	0.198755	-6.00868	1.8704e-09	2.43608e-08	1004.75	-1.06005	0.253558	-4.18069	2.90625e-05	0.000268183
ENSG00000228176.1	AC092265.1	lincRNA	16.6987	7.45724	1.64489	4.53357	5.79938e-06	4.32091e-05	18.1969	7.70353	1.63121	4.72258	2.32873e-06	2.71199e-05
ENSG00000229167.1	AC114488.1	antisense	253.029	3.34399	0.310912	10.7554	5.58822e-27	3.55753e-25	295.985	2.4935	0.348562	7.15368	8.44832e-13	2.44273e-11
ENSG00000237424.1	FOXD2-AS1	lincRNA	113.329	-1.45014	0.362231	-4.00335	6.24527e-05	0.000374483	127.802	-1.51485	0.380682	-3.9793	6.91192e-05	0.000585616
ENSG00000225028.1	AC096541.1	lincRNA	9.91354	6.70932	1.78421	3.76039	0.000169649	0.000920619	10.8456	6.96112	1.75632	3.96346	7.38699e-05	0.000621678
ENSG00000223883.1	LINC01707	lincRNA	38.8541	8.67331	1.55883	5.56398	2.63686e-08	2.95787e-07	42.7389	6.46087	1.17154	5.51483	3.4912e-08	5.62235e-07
ENSG00000229956.10	ZRANB2-AS2	processed_transcript	55.6547	1.76701	0.514863	3.432	0.000599156	0.00281081	66.6628	1.23355	0.490782	2.51344	0.0119561	0.0488874
ENSG00000233593.9	LINC02609	processed_transcript	205.716	-1.11827	0.285766	-3.91323	9.1068e-05	0.00052671	238.743	-1.24872	0.316112	-3.95024	7.80729e-05	0.000651817
ENSG00000223745.7	CCDC18-AS1	processed_transcript	289.689	1.99391	0.28962	6.88456	5.7967e-12	1.04598e-10	339.249	1.53161	0.315252	4.85838	1.18352e-06	1.4544e-05
ENSG00000224093.5	AL109613.1	antisense	1696.77	1.18714	0.203605	5.83059	5.52328e-09	6.79733e-08	1887.17	1.0992	0.251183	4.37608	1.20832e-05	0.000121338
ENSG00000227811.2	INKA2-AS1	bidirectional_promoter_lncRNA	59.5389	3.04071	0.522432	5.8203	5.87423e-09	7.19026e-08	81.4872	1.30526	0.448449	2.91061	0.00360725	0.0180686
ENSG00000232650.5	LINC01780	lincRNA	63.7701	1.33528	0.461657	2.89237	0.00382352	0.0141126	53.0353	3.91105	0.619836	6.30983	2.79351e-10	6.10519e-09
ENSG00000260941.1	LINC00622	sense_overlapping	156.69	10.6868	1.48112	7.21538	5.37821e-13	1.10847e-11	170.803	9.48932	1.46003	6.49938	8.06497e-11	1.87499e-09
ENSG00000228126.1	FALEC	lincRNA	46.3795	2.7681	0.562614	4.92006	8.65166e-07	7.50499e-06	57.6309	1.70436	0.492119	3.4633	0.000533601	0.00354068
ENSG00000237975.6	FLG-AS1	antisense	179.876	5.83493	0.509179	11.4595	2.10773e-30	1.69408e-28	197.955	5.19976	0.449884	11.558	6.72511e-31	7.10799e-29
ENSG00000236427.1	AL589986.2	lincRNA	25.3898	3.94444	0.891311	4.42543	9.62485e-06	6.87053e-05	26.1499	6.77652	1.56875	4.31969	1.56246e-05	0.000153171
ENSG00000270361.1	AL451085.1	lincRNA	14.1803	2.77265	0.9831	2.82031	0.00479774	0.0171217	15.862	2.50598	0.898488	2.7891	0.00528541	0.0248142
ENSG00000225855.6	RUSC1-AS1	antisense	145.963	1.43673	0.340682	4.21721	2.47348e-05	0.000161155	167.712	1.17534	0.365032	3.21983	0.00128267	0.00754749
ENSG00000237390.1	AL139130.1	lincRNA	41.4412	2.06008	0.585065	3.5211	0.000429753	0.00209509	46.5161	1.86034	0.560866	3.3169	0.000910226	0.00563681
ENSG00000228917.1	AL591806.1	antisense	6.93617	6.18935	1.88667	3.28057	0.00103598	0.00455208	7.77542	5.00471	1.79922	2.78161	0.00540903	0.0253049
ENSG00000283317.1	AL831711.1	lincRNA	3.99805	5.38939	2.21332	2.43498	0.0148925	0.0442745	4.33431	5.62824	2.14797	2.62025	0.00878643	0.0379699
ENSG00000273004.1	AL078644.2	lincRNA	58.3692	-1.49175	0.503211	-2.96447	0.00303209	0.0115643	62.6904	-1.45982	0.529627	-2.75631	0.00584579	0.0269373
ENSG00000230426.3	ERVMER61-1	lincRNA	323.233	2.42863	0.264619	9.17785	4.39782e-20	1.71182e-18	315.534	4.01387	0.345253	11.6259	3.04346e-31	3.2578e-29
ENSG00000233791.5	LINC01136	lincRNA	15.9901	2.98384	0.985095	3.02898	0.00245377	0.00960325	16.2249	4.43544	1.13982	3.89134	9.96908e-05	0.000809465
ENSG00000228792.2	AL356310.1	lincRNA	15.8538	2.96687	0.965991	3.07133	0.00213109	0.00851906	16.0849	4.42348	1.14674	3.85744	0.000114581	0.00091676
ENSG00000227764.1	LINC01693	lincRNA	9.46687	3.48972	1.30886	2.66623	0.00767076	0.0254388	9.7201	5.3055	1.7364	3.05547	0.0022471	0.0120989
ENSG00000237101.1	AC092809.4	antisense	10.3816	6.76752	1.7918	3.77693	0.000158772	0.000867642	11.4874	5.57606	1.72858	3.2258	0.00125619	0.00742296
ENSG00000234476.2	AC092811.1	lincRNA	27.0923	6.69832	1.565	4.28006	1.86839e-05	0.000124866	31.3752	3.78238	0.754042	5.01613	5.27215e-07	6.97271e-06
ENSG00000282418.1	AC092811.2	lincRNA	21.4643	4.7479	1.09709	4.3277	1.50675e-05	0.000102945	23.2537	5.02018	1.08842	4.61234	3.98158e-06	4.45934e-05
ENSG00000236358.1	AL355472.2	antisense	21.0866	2.0361	0.76772	2.65214	0.00799828	0.0263613	22.7946	2.10304	0.747036	2.81518	0.00487505	0.0232169
ENSG00000236008.2	LINC01814	lincRNA	101.642	2.39653	0.402354	5.95627	2.58053e-09	3.31035e-08	113.701	2.17846	0.393279	5.53922	3.03826e-08	4.94747e-07
ENSG00000230952.1	AC099344.1	lincRNA	1297.32	2.36807	0.204439	11.5833	5.00829e-31	4.26441e-29	1528.8	1.79123	0.256279	6.98936	2.76143e-12	7.58136e-11
ENSG00000231636.1	AGBL5-AS1	antisense	9.72049	5.19555	1.76503	2.94361	0.0032441	0.0122596	10.515	5.44754	1.72327	3.16116	0.00157141	0.00896546
ENSG00000205334.2	LINC01460	lincRNA	67.3508	6.42687	0.931035	6.90293	5.09415e-12	9.24719e-11	74.1502	5.58045	1.78452	3.12715	0.0017651	0.00986031
ENSG00000260025.1	CRIM1-DT	lincRNA	37.37	2.00198	0.594702	3.36635	0.00076169	0.00348393	42.1317	1.77953	0.559536	3.18037	0.00147085	0.00846576
ENSG00000236213.1	AC006369.1	antisense	11.5202	5.44804	1.71242	3.18148	0.00146523	0.00616096	13.6231	3.14492	1.05201	2.98943	0.00279495	0.0145172
ENSG00000231336.1	AC017006.1	antisense	6.6795	6.1353	1.90077	3.22779	0.00124751	0.00535206	7.49797	4.95133	1.8103	2.73509	0.00623626	0.0284603
ENSG00000228100.1	LINC01820	lincRNA	540.933	5.80024	0.327055	17.7348	2.26094e-70	1.02673e-67	615.359	4.01081	0.292179	13.7272	6.97519e-43	1.36016e-40
ENSG00000230773.8	AC092650.1	lincRNA	34.6959	1.98962	0.608178	3.27144	0.00107	0.00467615	98.5272	-1.17493	0.402599	-2.91837	0.00351865	0.0177023
ENSG00000225889.7	AC012368.1	antisense	29.2154	6.81164	1.55842	4.37086	1.23756e-05	8.60637e-05	41.9636	1.60911	0.559628	2.87531	0.00403625	0.0198537
ENSG00000204929.12	AC007389.1	processed_transcript	111.998	3.80705	0.438491	8.68217	3.88292e-18	1.27008e-16	134.991	2.45115	0.383879	6.38521	1.71161e-10	3.82038e-09
ENSG00000281920.1	AC007389.5	lincRNA	18.2055	7.58305	1.62924	4.65434	3.25015e-06	2.54182e-05	22.1635	3.08945	0.821766	3.75953	0.000170235	0.00129296
ENSG00000273245.1	AC092653.1	lincRNA	45.7155	1.42517	0.526764	2.70553	0.00681959	0.0230767	48.9523	1.51462	0.529038	2.86297	0.00419695	0.0204999
ENSG00000225439.2	BOLA3-AS1	antisense	329.021	-1.34554	0.260269	-5.1698	2.34351e-07	2.23655e-06	324.626	-1.13986	0.294035	-3.87663	0.000105914	0.000854672
ENSG00000230836.1	LINC01293	lincRNA	21.1408	-2.53787	0.794482	-3.19437	0.00140135	0.00592804	53.7487	-3.89515	0.645746	-6.03201	1.61933e-09	3.19483e-08
ENSG00000225420.1	AC104134.1	antisense	258.46	7.374	0.652886	11.2945	1.39745e-29	1.05768e-27	281.191	7.62178	0.669737	11.3803	5.24404e-30	5.45099e-28
ENSG00000261600.1	AC233266.2	lincRNA	60.0722	3.1145	0.534621	5.82562	5.69019e-09	6.98371e-08	63.583	3.57127	0.545726	6.54408	5.9863e-11	1.41395e-09
ENSG00000286101.1	AC093894.2	lincRNA	235.619	4.0805	0.353782	11.5339	8.89785e-31	7.39145e-29	314.179	1.77169	0.325927	5.43584	5.45381e-08	8.50531e-07
ENSG00000228528.1	AC068057.1	lincRNA	6.45906	6.08651	1.91521	3.17798	0.00148305	0.00622139	7.4747	3.93286	1.54169	2.55101	0.0107411	0.0448079
ENSG00000225328.1	LINC01594	antisense	13.1327	5.63922	1.69335	3.33021	0.000867819	0.00389841	16.0903	2.73134	0.935297	2.92029	0.00349704	0.0176042
ENSG00000214184.3	GCC2-AS1	antisense	119.835	1.40876	0.347319	4.0561	4.98985e-05	0.000305799	132.481	1.33433	0.367237	3.63343	0.000279676	0.00201237
ENSG00000236682.1	MAP3K2-DT	lincRNA	134.962	-1.30546	0.330221	-3.9533	7.70811e-05	0.000453319	218.771	-2.05638	0.325857	-6.31069	2.77791e-10	6.08167e-09
ENSG00000286058.1	AC018865.3	processed_transcript	836.3	1.56149	0.21223	7.35751	1.87374e-13	4.06155e-12	849.634	2.01848	0.277675	7.26922	3.6156e-13	1.10243e-11
ENSG00000286208.1	AC093838.2	lincRNA	74.5345	6.15182	0.834579	7.37117	1.69132e-13	3.69029e-12	84.8378	4.06443	0.536428	7.57683	3.54088e-14	1.18445e-12
ENSG00000224559.2	LINC01087	lincRNA	31.0061	6.89561	1.55496	4.4346	9.22442e-06	6.61589e-05	35.4253	4.13036	0.763296	5.41122	6.25984e-08	9.64866e-07
ENSG00000231890.7	DARS-AS1	antisense	157.938	1.60868	0.333544	4.82298	1.41426e-06	1.18167e-05	182.212	1.29867	0.353803	3.67059	0.000241991	0.00176751
ENSG00000283436.1	LINC01958	lincRNA	7.00865	6.20301	1.8887	3.28427	0.00102248	0.00450562	8.1021	4.00558	1.48004	2.7064	0.0068016	0.0305417
ENSG00000204380.4	PKP4-AS1	antisense	22.7466	3.31692	0.848907	3.90729	9.33368e-05	0.00053846	28.0573	2.0347	0.679606	2.99394	0.00275397	0.0143488
ENSG00000228586.1	AC005042.2	lincRNA	23.5594	7.95287	1.5948	4.98675	6.14045e-07	5.44803e-06	25.9074	6.75185	1.55694	4.33662	1.44693e-05	0.000142735
ENSG00000236283.4	AC019197.1	antisense	519.203	1.31426	0.239366	5.4906	4.00564e-08	4.36043e-07	481.193	2.37517	0.300526	7.90337	2.71453e-15	1.01462e-13
ENSG00000260868.1	LINC01960	lincRNA	14.9051	4.80142	1.30255	3.68616	0.000227659	0.00119335	18.4051	2.51073	0.884466	2.83869	0.00452987	0.0218544
ENSG00000234663.6	LINC01934	lincRNA	165.677	5.03301	0.459595	10.951	6.57424e-28	4.3904e-26	182.699	4.49721	0.431987	10.4105	2.22013e-25	1.77293e-23
ENSG00000197585.9	AC068051.1	antisense	9.98288	5.22599	1.80294	2.8986	0.00374834	0.0138784	11.7492	3.13345	1.18053	2.65428	0.00794776	0.0348121
ENSG00000235419.5	AC010149.1	antisense	31.5038	5.90408	1.17513	5.02421	5.05509e-07	4.56382e-06	35.2193	4.57178	0.81102	5.63707	1.7297e-08	2.94588e-07
ENSG00000222001.2	AC106876.1	processed_transcript	30.0942	-1.69733	0.635874	-2.66928	0.00760135	0.0252393	36.8947	-1.91465	0.600044	-3.19085	0.00141857	0.00821081
ENSG00000280744.1	LINC01173	lincRNA	170.059	5.23857	0.474496	11.0403	2.44268e-28	1.6807e-26	184.274	5.55709	0.510562	10.8842	1.37033e-27	1.23995e-25
ENSG00000124835.2	AC105760.1	antisense	70.3227	2.37285	0.503004	4.71736	2.38928e-06	1.91079e-05	73.3226	2.79461	0.523235	5.34101	9.24287e-08	1.39224e-06
ENSG00000186235.10	LINC02610	processed_transcript	20.6245	4.68103	1.08863	4.29994	1.70845e-05	0.000115223	22.1047	5.51265	1.22863	4.48682	7.22954e-06	7.69611e-05
ENSG00000233392.5	AC104809.2	processed_transcript	156.759	1.56749	0.334591	4.6848	2.80228e-06	2.21315e-05	129.926	5.92922	0.62008	9.56203	1.15473e-21	6.93249e-20
ENSG00000224272.2	AC131097.3	antisense	70.2089	-3.19042	0.48548	-6.57167	4.97533e-11	8.06922e-10	40.9333	-2.14085	0.5851	-3.65894	0.000253259	0.00183913
ENSG00000237940.3	LINC01238	lincRNA	26.5264	2.05695	0.711385	2.89147	0.00383443	0.0141391	24.0211	5.04562	1.06287	4.74715	2.06303e-06	2.42616e-05
ENSG00000233912.1	AC026202.2	antisense	29.164	2.70528	0.694575	3.89488	9.82489e-05	0.000563239	32.9023	2.37921	0.661583	3.59624	0.000322853	0.00228771
ENSG00000232352.1	SEMA3B-AS1	antisense	83.8486	2.918	0.44347	6.57992	4.70714e-11	7.66162e-10	88.4444	3.37883	0.470444	7.18221	6.85957e-13	2.01541e-11
ENSG00000242741.1	LINC02005	lincRNA	31.4527	6.91346	1.55795	4.43754	9.09921e-06	6.53469e-05	35.3645	4.57521	0.824642	5.54812	2.88763e-08	4.71983e-07
ENSG00000240241.5	AC108752.1	lincRNA	65.1379	2.73091	0.498591	5.47725	4.31988e-08	4.67821e-07	65.4766	4.01429	0.583471	6.88001	5.98502e-12	1.57978e-10
ENSG00000243701.6	DUBR	lincRNA	120.526	2.60353	0.368564	7.06398	1.61801e-12	3.1311e-11	125.849	3.12755	0.414813	7.53967	4.71178e-14	1.55341e-12
ENSG00000248243.1	LINC02014	lincRNA	172.606	7.79262	0.884923	8.80599	1.29703e-18	4.42306e-17	187.682	9.63018	1.45362	6.62494	3.47384e-11	8.40236e-10
ENSG00000286086.1	AC099661.1	lincRNA	32.5439	3.39155	0.727982	4.65884	3.18002e-06	2.49054e-05	39.7749	2.14547	0.645174	3.32541	0.000882887	0.00549185
ENSG00000226859.1	LINC02051	lincRNA	59.3906	6.24046	0.941483	6.62833	3.39496e-11	5.64039e-10	63.8792	9.51543	1.51276	6.2901	3.1726e-10	6.89774e-09
ENSG00000230102.7	LINC02028	processed_transcript	48.2515	3.23025	0.578482	5.58401	2.35031e-08	2.65942e-07	54.5774	2.75336	0.535754	5.13922	2.75874e-07	3.82981e-06
ENSG00000235897.1	TM4SF19-AS1	antisense	72.6994	3.30121	0.500169	6.6002	4.10602e-11	6.75502e-10	80.1723	3.16068	0.489784	6.45322	1.09495e-10	2.50624e-09
ENSG00000249673.6	NOP14-AS1	antisense	1158.07	3.31478	0.221451	14.9685	1.18025e-50	2.43623e-48	1409.81	2.13408	0.257409	8.29061	1.12665e-16	4.86123e-15
ENSG00000246526.2	LINC002481	lincRNA	286.373	1.65007	0.263307	6.2667	3.68779e-10	5.2857e-09	288.754	2.188	0.346645	6.31192	2.75593e-10	6.03879e-09
ENSG00000247624.6	CPEB2-DT	lincRNA	25.1123	2.4598	0.731823	3.36119	0.000776072	0.00353843	26.5171	2.80401	0.730556	3.83818	0.00012395	0.000980997
ENSG00000226950.6	DANCR	processed_transcript	2195.1	-1.73733	0.213611	-8.13314	4.18322e-16	1.15365e-14	1757.4	-1.12374	0.269073	-4.17634	2.96232e-05	0.000272757
ENSG00000249307.6	LINC01088	processed_transcript	130.208	7.9727	1.09547	7.2779	3.39051e-13	7.13369e-12	147.836	4.3618	0.487431	8.94855	3.60193e-19	1.8321e-17
ENSG00000251095.6	AC097478.1	antisense	4172.17	2.73914	0.201586	13.588	4.71787e-42	7.10209e-40	3956.76	9.61982	1.30724	7.35887	1.85467e-13	5.84639e-12
ENSG00000246090.6	AP002026.1	antisense	265.858	2.79119	0.304096	9.17865	4.3654e-20	1.70173e-18	348.716	1.40234	0.329991	4.24962	2.1413e-05	0.000203416
ENSG00000251432.6	LINC02615	lincRNA	46.3644	3.25628	0.60777	5.35774	8.42671e-08	8.63493e-07	56.3381	2.09919	0.522088	4.02076	5.80097e-05	0.0005018
ENSG00000248429.5	FAM198B-AS1	antisense	1084.71	1.44503	0.209797	6.88773	5.6689e-12	1.02563e-10	1202.81	1.35282	0.301963	4.4801	7.46081e-06	7.90217e-05
ENSG00000225138.7	SLC9A3-AS1	processed_transcript	91.724	1.25641	0.430153	2.92085	0.00349077	0.0130542	99.5703	1.29206	0.446517	2.89365	0.00380792	0.0188783
ENSG00000271781.1	AC026740.1	antisense	73.8399	1.29603	0.436762	2.96736	0.00300373	0.0114666	73.6894	1.81253	0.48109	3.76754	0.000164865	0.00125857
ENSG00000271980.1	AC012640.4	antisense	19.3473	2.8732	0.859668	3.34222	0.000831109	0.0037517	18.9828	5.31309	1.27097	4.18034	2.91075e-05	0.0002685
ENSG00000261360.1	AC010491.1	antisense	69.7047	2.56753	0.489967	5.24022	1.60388e-07	1.57424e-06	82.7096	1.86274	0.460889	4.04163	5.30807e-05	0.000463305
ENSG00000250337.6	PURPL	lincRNA	6579.87	1.66694	0.19005	8.77104	1.77021e-18	5.98424e-17	5584.13	5.35509	0.256483	20.8789	8.32082e-97	1.04655e-93
ENSG00000251257.2	AC010457.1	antisense	16.2277	3.87908	1.0563	3.67234	0.000240342	0.0012515	17.0056	5.15314	1.29057	3.99292	6.52634e-05	0.000556509
ENSG00000286048.1	AC008966.3	antisense	55.8519	7.75004	1.50855	5.13743	2.78524e-07	2.61778e-06	68.5753	2.93051	0.522425	5.60945	2.02976e-08	3.39711e-07
ENSG00000247796.2	AC008966.1	antisense	133.943	1.84996	0.352853	5.24286	1.58105e-07	1.55408e-06	158.248	1.38346	0.348905	3.96514	7.33522e-05	0.000617528
ENSG00000237705.1	AC008937.2	antisense	11.5348	4.40613	1.38789	3.1747	0.00149993	0.00628362	14.1906	2.46581	0.961458	2.56466	0.0103278	0.043386
ENSG00000271926.1	AC008972.1	lincRNA	18.4232	3.73016	0.983892	3.79123	0.000149901	0.000824623	20.6278	3.26654	0.891859	3.66262	0.000249647	0.00181604
ENSG00000272081.1	AC008972.2	lincRNA	44.9157	2.04467	0.542743	3.7673	0.000165023	0.000898379	44.5628	2.93559	0.594867	4.93486	8.02082e-07	1.02314e-05
ENSG00000271714.1	AC010501.1	antisense	119.837	3.24983	0.412823	7.87223	3.48369e-15	8.82977e-14	146.64	2.05623	0.371704	5.5319	3.1678e-08	5.14435e-07
ENSG00000279232.2	AC008522.1	antisense	26.386	5.04825	1.04346	4.83797	1.31175e-06	1.1021e-05	30.4264	3.44263	0.747325	4.6066	4.09301e-06	4.57395e-05
ENSG00000251169.2	LINC01843	lincRNA	37.4885	-1.63381	0.580153	-2.81617	0.00485993	0.0173187	42.988	-1.72721	0.570514	-3.02746	0.00246616	0.0130685
ENSG00000249637.1	AC008438.1	antisense	50.643	-1.90866	0.504962	-3.77981	0.000156946	0.000859217	74.1015	-2.4284	0.480436	-5.05459	4.31323e-07	5.7959e-06
ENSG00000249669.9	CARMN	lincRNA	97.6481	1.58168	0.392472	4.03004	5.57666e-05	0.000337811	111.017	1.35582	0.410753	3.30081	0.000964061	0.00590988
ENSG00000253522.6	MIR3142HG	lincRNA	234.125	-1.18711	0.275878	-4.30301	1.68491e-05	0.000113804	243.073	-1.08429	0.310705	-3.48977	0.000483441	0.00324465
ENSG00000254186.2	AC113414.1	antisense	24.8273	4.18136	0.922292	4.53366	5.79707e-06	4.32037e-05	31.8019	2.05122	0.645094	3.17973	0.00147414	0.00847975
ENSG00000250999.1	AC136604.3	antisense	69.4555	2.15805	0.500775	4.30942	1.63682e-05	0.000110914	70.275	2.87711	0.499995	5.75427	8.7016e-09	1.54582e-07
ENSG00000250903.8	GMDS-DT	lincRNA	1124.97	1.06767	0.19571	5.45539	4.88654e-08	5.23775e-07	1214.53	1.11317	0.248695	4.47605	7.60354e-06	8.0398e-05
ENSG00000230269.6	LINC02525	lincRNA	837.172	1.92665	0.206668	9.32248	1.13651e-20	4.70616e-19	815.083	2.9693	0.273327	10.8635	1.71936e-27	1.5502e-25
ENSG00000260604.2	AL590004.3	lincRNA	885.697	-1.19283	0.22123	-5.39183	6.97424e-08	7.28631e-07	1860.32	-2.4135	0.248623	-9.70748	2.80171e-22	1.75753e-20
ENSG00000261189.1	AL031058.1	antisense	363.215	-1.04647	0.251695	-4.1577	3.21464e-05	0.0002046	523.383	-1.60779	0.290016	-5.54379	2.95988e-08	4.83165e-07
ENSG00000229931.1	AL137003.1	antisense	115.07	-1.08334	0.395331	-2.74034	0.00613762	0.0210991	162.196	-1.59682	0.423782	-3.76802	0.000164546	0.00125696
ENSG00000272468.1	AL021807.1	lincRNA	39.8086	6.25129	1.15718	5.40219	6.58312e-08	6.90151e-07	50.0633	2.56489	0.580499	4.41842	9.94248e-06	0.000101958
ENSG00000214922.9	HLA-F-AS1	processed_transcript	106.839	-1.45296	0.364719	-3.98378	6.78284e-05	0.00040264	98.8306	-1.11746	0.400118	-2.79283	0.00522494	0.024567
ENSG00000206337.10	HCP5	sense_overlapping	43.5296	1.73422	0.539127	3.21672	0.00129664	0.00553149	125.087	-1.2783	0.379077	-3.37214	0.000745878	0.00475363
ENSG00000232940.5	HCG25	antisense	58.1179	1.49215	0.486469	3.06731	0.00215993	0.00861384	61.1441	1.68487	0.504505	3.33964	0.000838864	0.00525439
ENSG00000197251.3	LINC00336	lincRNA	12.2236	7.00911	1.71161	4.09504	4.22097e-05	0.000261979	13.5994	5.80796	1.65387	3.51173	0.000445201	0.0030235
ENSG00000225339.3	AL354740.1	processed_transcript	35.6387	3.846	0.727219	5.28864	1.23229e-07	1.23407e-06	43.8577	2.27314	0.566923	4.0096	6.08214e-05	0.000523243
ENSG00000224666.3	Z84484.1	antisense	3.85309	5.34033	2.17896	2.45086	0.0142516	0.0427283	4.1943	5.58505	2.10986	2.64712	0.00811815	0.0354412
ENSG00000281450.1	PANDAR	lincRNA	8.59987	3.3371	1.36108	2.4518	0.0142146	0.0427017	9.03436	4.17914	1.46135	2.85977	0.00423946	0.0206714
ENSG00000285244.1	DINOL	bidirectional_promoter_lncRNA	38.1781	1.74391	0.571565	3.05111	0.00227996	0.00900995	32.5354	6.08197	1.1736	5.18234	2.19121e-07	3.10185e-06
ENSG00000234753.5	FOXP4-AS1	antisense	84.0429	-2.28859	0.435919	-5.25004	1.52067e-07	1.4958e-06	124.013	-2.79793	0.424904	-6.58486	4.5532e-11	1.08978e-09
ENSG00000272223.1	AL136304.1	antisense	28.1507	1.98864	0.681215	2.91925	0.0035087	0.0131159	30.1038	2.12204	0.663929	3.19619	0.00139256	0.00808444
ENSG00000236961.1	AL136131.2	lincRNA	9.39418	6.62608	1.78618	3.70963	0.000207566	0.00110352	10.7391	4.39505	1.40583	3.12631	0.00177017	0.00988428
ENSG00000266680.1	AL135905.1	antisense	636.452	1.96472	0.22105	8.88813	6.21457e-19	2.17366e-17	667.482	2.25963	0.270539	8.35233	6.69273e-17	2.91777e-15
ENSG00000234155.1	LINC02535	lincRNA	38.4369	-1.55053	0.564418	-2.74713	0.00601201	0.0207196	106.24	-3.16406	0.458079	-6.90725	4.94124e-12	1.32428e-10
ENSG00000230943.2	LINC02541	lincRNA	45.818	5.86402	0.998279	5.87413	4.25072e-09	5.32258e-08	56.6414	2.69384	0.618749	4.35368	1.33868e-05	0.000132839
ENSG00000272841.1	AL139393.2	antisense	42.4991	1.45583	0.549038	2.65161	0.00801101	0.0263969	128.223	-1.46632	0.390167	-3.75818	0.000171153	0.00129914
ENSG00000231720.1	AL353747.3	lincRNA	128.595	-1.42084	0.338278	-4.20021	2.66662e-05	0.000172788	152.844	-1.58732	0.358356	-4.42944	9.44771e-06	9.72808e-05
ENSG00000198221.8	AFDN-DT	lincRNA	101.305	-1.00687	0.364955	-2.7589	0.00579957	0.0201557	131.799	-1.37446	0.378671	-3.62969	0.000283757	0.00203999
ENSG00000225981.1	AC102953.1	antisense	26.3168	4.0032	0.858397	4.66358	3.10763e-06	2.43875e-05	29.2305	3.64741	0.777285	4.6925	2.69892e-06	3.10148e-05
ENSG00000230658.1	KLHL7-DT	lincRNA	92.1852	3.1562	0.444882	7.09445	1.29863e-12	2.53647e-11	118.638	1.67297	0.410314	4.07728	4.55657e-05	0.000403452
ENSG00000224057.1	EGFR-AS1	antisense	182.869	-1.98807	0.3383	-5.87666	4.18624e-09	5.24908e-08	188.877	-1.8885	0.401164	-4.70755	2.50716e-06	2.90779e-05
ENSG00000223475.1	AC099681.1	antisense	32.9294	8.4395	1.55833	5.41572	6.10419e-08	6.43657e-07	37.1422	4.93275	0.857593	5.75186	8.8268e-09	1.56475e-07
ENSG00000233977.1	AC099681.3	lincRNA	19.0148	7.64671	1.62443	4.70731	2.51004e-06	1.9974e-05	20.7589	7.89554	1.61359	4.89316	9.92283e-07	1.24493e-05
ENSG00000231394.1	AC099681.2	lincRNA	26.715	8.13411	1.57987	5.14859	2.62458e-07	2.48219e-06	29.7402	5.37817	1.04928	5.12559	2.96609e-07	4.09506e-06
ENSG00000182165.17	TP53TG1	lincRNA	596.514	2.08197	0.22946	9.07338	1.15383e-19	4.28902e-18	577.948	3.35499	0.285934	11.7335	8.58634e-32	9.59953e-30
ENSG00000226965.1	AC092167.1	lincRNA	139.369	4.24198	0.453932	9.34496	9.19207e-21	3.84136e-19	144.031	10.6877	1.49298	7.15862	8.14952e-13	2.36722e-11
ENSG00000285106.1	AC016831.7	lincRNA	248.183	1.61279	0.270819	5.95521	2.59745e-09	3.33048e-08	244.384	2.33591	0.321089	7.27494	3.4657e-13	1.06187e-11
ENSG00000226380.9	AC016831.1	lincRNA	666.403	1.74133	0.215474	8.08139	6.40303e-16	1.74115e-14	660.878	2.46563	0.269604	9.14537	5.94249e-20	3.19409e-18
ENSG00000260231.2	KDM7A-DT	bidirectional_promoter_lncRNA	606.291	1.29085	0.221411	5.83012	5.53891e-09	6.81349e-08	667.978	1.23724	0.27017	4.5795	4.66095e-06	5.14835e-05
ENSG00000182366.9	FAM87A	lincRNA	95.992	6.19669	0.73905	8.38468	5.08641e-17	1.51464e-15	105.443	5.59611	0.612617	9.13476	6.55534e-20	3.50105e-18
ENSG00000253982.1	AC100810.1	antisense	115.753	1.3875	0.380795	3.64369	0.000268753	0.0013819	128.996	1.28445	0.398981	3.21931	0.00128498	0.00755935
ENSG00000254625.1	AF233439.2	antisense	12.6282	7.05676	1.7067	4.13474	3.55361e-05	0.000224184	16.2094	2.5281	0.906105	2.79008	0.00526957	0.0247537
ENSG00000284606.1	AC105233.5	processed_transcript	22.536	3.51932	0.867973	4.05465	5.021e-05	0.00030757	27.8382	2.10199	0.693712	3.03006	0.00244504	0.0129785
ENSG00000253671.2	AC027117.1	processed_transcript	130.262	2.79069	0.442935	6.30045	2.9678e-10	4.30814e-09	152.149	2.12791	0.397249	5.35662	8.47941e-08	1.28416e-06
ENSG00000253125.1	AC055854.1	processed_transcript	22.5448	5.41799	1.23548	4.38532	1.15816e-05	8.11011e-05	25.035	4.67053	0.98611	4.73632	2.1763e-06	2.54864e-05
ENSG00000253616.5	AC107959.3	antisense	31.8771	-2.08262	0.638222	-3.26316	0.00110176	0.00479701	93.1107	-3.69747	0.501434	-7.37378	1.65851e-13	5.25439e-12
ENSG00000254109.5	RBPMS-AS1	antisense	149.962	2.64461	0.343341	7.70259	1.33335e-14	3.16738e-13	167.815	2.39235	0.354035	6.75737	1.4052e-11	3.55255e-10
ENSG00000253474.1	AC022568.1	lincRNA	6.86069	6.17061	1.91251	3.22644	0.00125342	0.00537064	7.45378	6.41259	1.87158	3.4263	0.000611863	0.00399673
ENSG00000272457.1	AC113194.1	antisense	10.0527	3.58227	1.30297	2.74931	0.00597214	0.0206031	10.3075	5.41771	1.73545	3.12179	0.00179753	0.0100193
ENSG00000254231.2	AC103760.1	processed_transcript	56.2609	1.23494	0.471566	2.61881	0.00882375	0.0286898	132.008	-1.04638	0.374384	-2.79494	0.00519087	0.0244503
ENSG00000248858.7	AC104211.1	processed_transcript	60.4218	1.13948	0.467335	2.43824	0.0147588	0.0439633	59.9524	1.62903	0.506655	3.21526	0.00130328	0.00764553
ENSG00000271971.1	AC120053.1	antisense	92.1254	1.44592	0.400624	3.60918	0.000307167	0.00155708	109.137	1.04184	0.391025	2.66438	0.00771306	0.0339615
ENSG00000253666.1	AP000424.1	antisense	167.548	4.42026	0.402126	10.9922	4.16447e-28	2.82966e-26	209.363	2.3234	0.332902	6.97923	2.9681e-12	8.12434e-11
ENSG00000254364.1	AP000424.2	antisense	15.053	7.3113	1.67781	4.35764	1.31472e-05	9.11042e-05	18.1064	3.32075	0.937096	3.54366	0.000394609	0.00272254
ENSG00000246263.2	UBR5-AS1	antisense	159.028	2.84851	0.345623	8.24166	1.69836e-16	4.84557e-15	170.469	3.05518	0.37199	8.21306	2.15629e-16	9.01022e-15
ENSG00000272037.1	AP002907.1	antisense	8.98104	3.4161	1.37609	2.48246	0.0130479	0.0397446	9.67605	3.63467	1.29502	2.80666	0.00500577	0.0237336
ENSG00000247081.7	BAALC-AS1	antisense	100.156	4.44364	0.510166	8.71018	3.03392e-18	1.00444e-16	116.387	3.11626	0.445865	6.98924	2.76371e-12	7.58136e-11
ENSG00000245149.3	RNF139-AS1	lincRNA	92.4992	-1.0633	0.407106	-2.61185	0.00900533	0.0291688	114.379	-1.3283	0.408393	-3.25249	0.00114398	0.00684184
ENSG00000253438.3	PCAT1	antisense	95.5711	5.04463	1.16605	4.32626	1.51662e-05	0.00010354	126.86	1.97138	0.41646	4.73365	2.2052e-06	2.58008e-05
ENSG00000282961.1	PRNCR1	lincRNA	71.7387	5.076	0.671552	7.55861	4.07407e-14	9.39139e-13	99.4295	1.68603	0.451057	3.73795	0.00018553	0.00139731
ENSG00000249859.10	PVT1	lincRNA	3692.81	1.11529	0.179402	6.2167	5.07707e-10	7.13067e-09	3209.68	2.60244	0.282541	9.21083	3.23617e-20	1.76585e-18
ENSG00000286034.1	AC100822.1	lincRNA	53.871	7.69784	1.51008	5.09763	3.43934e-07	3.19072e-06	64.9605	3.1707	0.537387	5.90021	3.63048e-09	6.84592e-08
ENSG00000254275.6	LINC00824	processed_transcript	29.756	6.83507	1.56404	4.37013	1.24171e-05	8.631e-05	42.1677	1.67538	0.582675	2.87532	0.00403619	0.0198537
ENSG00000261220.2	AC103706.1	lincRNA	19.9861	-2.23132	0.799664	-2.79032	0.00526553	0.0185266	23.9683	-2.39529	0.771346	-3.10534	0.00190062	0.0105008
ENSG00000253196.1	AC083841.1	antisense	48.798	-4.85097	0.762144	-6.3649	1.9542e-10	2.90613e-09	13.4038	-2.72468	1.04318	-2.61189	0.00900428	0.0387528
ENSG00000253931.1	AC105118.1	antisense	47.9208	1.9158	0.530341	3.61239	0.000303385	0.00153878	50.3811	2.18574	0.549045	3.98098	6.86306e-05	0.000582457
ENSG00000236924.1	AL162411.1	lincRNA	81.3535	-1.95583	0.420999	-4.6457	3.3893e-06	2.64457e-05	84.1803	-1.8607	0.433484	-4.29243	1.76725e-05	0.000171775
ENSG00000285911.1	AL391834.3	bidirectional_promoter_lncRNA	14.5064	3.35139	1.04305	3.21306	0.00131327	0.00559646	14.3851	7.36354	1.67602	4.39346	1.11559e-05	0.000112701
ENSG00000230074.1	AL162231.2	antisense	44.2234	5.38888	0.876956	6.14499	7.997e-10	1.10326e-08	50.1389	3.94473	0.628877	6.27266	3.54925e-10	7.67022e-09
ENSG00000229422.2	AL512625.2	lincRNA	76.5399	-1.22288	0.427152	-2.86286	0.00419832	0.0152644	87.3008	-1.3158	0.425693	-3.09096	0.00199507	0.0109259
ENSG00000229109.1	AL137847.1	antisense	25.9905	4.26112	0.899871	4.73525	2.18781e-06	1.76522e-05	29.6364	3.35571	0.74701	4.49218	7.04968e-06	7.52049e-05
ENSG00000271155.1	AL161729.1	antisense	34.2132	-1.5489	0.598113	-2.58964	0.00960767	0.0307146	67.5542	-2.60984	0.513736	-5.08013	3.77182e-07	5.10383e-06
ENSG00000256040.2	PAPPA-AS1	antisense	194.296	2.53283	0.352056	7.19441	6.27333e-13	1.27559e-11	187.794	4.57961	0.442836	10.3415	4.57119e-25	3.59338e-23
ENSG00000285820.1	AL157829.1	antisense	103.46	10.0887	1.48604	6.78898	1.1293e-11	1.98388e-10	113.264	7.88928	1.08605	7.26417	3.75333e-13	1.14028e-11
ENSG00000233901.5	LINC01503	lincRNA	205.781	4.83446	0.396289	12.1993	3.13397e-34	3.11647e-32	229.54	4.11305	0.372552	11.0402	2.44471e-28	2.26925e-26
ENSG00000260193.1	AL138781.1	lincRNA	10.1183	3.12478	1.28035	2.44056	0.0146646	0.0437162	11.2634	2.84448	1.12659	2.52485	0.0115747	0.0476378
ENSG00000237886.1	NALT1	antisense	37.1541	3.74258	0.698353	5.35914	8.36178e-08	8.58747e-07	37.8953	7.31635	1.51893	4.81677	1.45897e-06	1.75769e-05
ENSG00000279141.3	AL590226.2	lincRNA	62.4436	9.36235	1.51118	6.19538	5.8143e-10	8.12005e-09	71.3819	4.38918	0.606823	7.23306	4.72243e-13	1.42097e-11
ENSG00000231298.6	MANCR	lincRNA	65.5509	5.13774	0.702698	7.31144	2.6429e-13	5.61709e-12	73.6088	4.02654	0.559282	7.19948	6.04406e-13	1.78658e-11
ENSG00000228951.1	AL365356.3	lincRNA	38.7213	7.22065	1.53164	4.71433	2.42504e-06	1.93485e-05	42.4087	6.48422	1.15386	5.6196	1.91403e-08	3.2379e-07
ENSG00000176236.6	C10orf111	bidirectional_promoter_lncRNA	14.0308	-3.46837	1.06778	-3.2482	0.00116139	0.00503246	14.0898	-3.3362	1.06651	-3.12816	0.00175907	0.00983749
ENSG00000230109.1	LINC02643	lincRNA	9.02579	6.56686	1.81078	3.62654	0.000287242	0.00146563	10.2493	4.40434	1.44576	3.04639	0.00231606	0.012417
ENSG00000231187.2	AL356056.2	antisense	66.5081	-1.81232	0.462517	-3.91838	8.91444e-05	0.000517121	60.8278	-1.47715	0.506891	-2.91414	0.00356669	0.0179082
ENSG00000232682.2	AL592430.1	antisense	9.75957	6.67961	1.78753	3.73678	0.000186395	0.00100093	12.2925	2.66179	1.05303	2.52773	0.0114801	0.0473391
ENSG00000237512.6	UNC5B-AS1	antisense	76.9952	6.62196	0.937906	7.06037	1.66061e-12	3.20899e-11	83.3056	9.90055	1.51239	6.5463	5.8979e-11	1.39569e-09
ENSG00000229569.1	AL356753.1	lincRNA	29.9884	6.85034	1.55848	4.39553	1.10501e-05	7.77187e-05	33.1295	5.53884	1.03274	5.36325	8.174e-08	1.2394e-06
ENSG00000285972.1	CERNA2	lincRNA	21.4453	5.33584	1.23564	4.31828	1.57249e-05	0.000107007	23.3195	5.56992	1.22134	4.5605	5.10308e-06	5.58121e-05
ENSG00000224750.6	AL391704.1	lincRNA	8.4762	6.47706	1.82292	3.55313	0.00038068	0.00188589	10.2102	3.25152	1.21731	2.67107	0.00756091	0.0333807
ENSG00000273162.1	AL133215.2	lincRNA	55.5996	-2.00858	0.544356	-3.68983	0.000224403	0.00117832	65.1637	-2.13116	0.539774	-3.94825	7.87256e-05	0.00065683
ENSG00000229272.1	AL157788.1	antisense	131.745	7.40187	0.893936	8.28009	1.23086e-16	3.56022e-15	143.77	7.25086	0.809166	8.96091	3.22008e-19	1.64303e-17
ENSG00000236303.3	LINC02646	lincRNA	16.7991	3.94417	1.08956	3.61997	0.000294639	0.00149945	20.2614	2.49768	0.806872	3.0955	0.0019648	0.0107882
ENSG00000230098.1	TCERG1L-AS1	antisense	7.30172	4.77481	1.8439	2.58951	0.00961125	0.0307224	7.69368	6.46355	1.84089	3.51111	0.000446246	0.00302814
ENSG00000189275.3	LINC01164	lincRNA	11.7856	5.47633	1.70713	3.20792	0.001337	0.00568851	12.8046	5.71605	1.66703	3.42888	0.000606085	0.0039662
ENSG00000226416.1	MRPL23-AS1	antisense	326.479	2.19637	0.297769	7.37608	1.6302e-13	3.56771e-12	308.688	4.17958	0.368782	11.3335	8.9585e-30	9.01405e-28
ENSG00000224513.2	AC109309.1	antisense	3.92557	5.3649	2.18628	2.4539	0.0141317	0.0424761	4.26431	5.60664	2.11902	2.64587	0.00814823	0.0355602
ENSG00000254757.1	AC127526.1	lincRNA	24.3687	8.00236	1.58729	5.04151	4.61864e-07	4.199e-06	26.5505	8.24843	1.58052	5.21882	1.80071e-07	2.59284e-06
ENSG00000251381.7	LINC00958	lincRNA	730.838	2.70798	0.215416	12.571	3.04947e-36	3.4193e-34	849.874	2.12342	0.329437	6.44559	1.1515e-10	2.62373e-09
ENSG00000260196.1	AC124798.1	antisense	278.328	-1.04358	0.283874	-3.67621	0.000236725	0.00123493	455.191	-1.84604	0.35307	-5.22853	1.70859e-07	2.46584e-06
ENSG00000245573.8	BDNF-AS	processed_transcript	57.6357	3.04785	0.543445	5.60839	2.0422e-08	2.32917e-07	74.1009	1.62863	0.459626	3.54338	0.000395036	0.00272474
ENSG00000245571.6	FAM111A-DT	lincRNA	57.9029	1.99612	0.48713	4.09772	4.17243e-05	0.000259321	197.115	-1.53416	0.337314	-4.54816	5.41164e-06	5.89307e-05
ENSG00000229719.5	MIR194-2HG	lincRNA	736.228	1.72302	0.215662	7.98947	1.35523e-15	3.56429e-14	709.482	2.72855	0.291007	9.37625	6.8364e-21	3.92624e-19
ENSG00000245532.8	NEAT1	lincRNA	148631	1.77914	0.17293	10.2882	7.96301e-25	4.3668e-23	157492	1.9762	0.238279	8.29366	1.09813e-16	4.7463e-15
ENSG00000255120.5	OVOL1-AS1	antisense	21.3132	5.33487	1.25052	4.26612	1.98901e-05	0.000132278	22.6363	8.0169	1.60753	4.98709	6.12955e-07	8.00981e-06
ENSG00000255468.7	AP001107.9	antisense	573.436	-2.72515	0.228532	-11.9246	8.81486e-33	8.14164e-31	427.263	-2.07139	0.311617	-6.64724	2.98638e-11	7.27224e-10
ENSG00000254447.3	OR7E11P	processed_transcript	10.0917	6.72973	1.76366	3.81576	0.000135762	0.000753997	11.2074	5.54219	1.70004	3.26004	0.00111397	0.00668621
ENSG00000255306.1	AC004923.4	antisense	111.661	1.63443	0.392988	4.15899	3.19657e-05	0.000203592	135.175	1.09359	0.397092	2.75399	0.00588735	0.027104
ENSG00000285933.1	AP003498.2	lincRNA	8.11082	6.41541	1.82885	3.50788	0.000451689	0.00218989	9.57105	3.61972	1.29054	2.8048	0.00503479	0.0238423
ENSG00000248671.7	AP002495.1	processed_transcript	130.657	2.64795	0.405587	6.52869	6.63483e-11	1.06091e-09	140.887	2.79071	0.395975	7.04768	1.81923e-12	5.08475e-11
ENSG00000250303.3	AP002884.1	lincRNA	101.133	2.52538	0.394615	6.39959	1.5579e-10	2.36348e-09	136.884	1.12546	0.371905	3.02621	0.00247644	0.0131174
ENSG00000255435.6	AP001267.3	antisense	33.0194	1.96569	0.629101	3.12461	0.00178042	0.00729492	36.3082	1.89774	0.611359	3.10414	0.00190833	0.0105378
ENSG00000254561.3	AP003393.1	antisense	92.3836	5.27464	0.612179	8.61617	6.9229e-18	2.21135e-16	99.6329	5.90315	0.684946	8.61842	6.78866e-18	3.15654e-16
ENSG00000249695.6	AC026369.1	antisense	6.72162	4.64034	1.87218	2.47858	0.0131908	0.0401082	7.51218	3.8908	1.5006	2.59282	0.00951914	0.0405644
ENSG00000236908.2	AC005865.1	lincRNA	8.07458	6.40954	1.82973	3.50301	0.000460039	0.00222447	8.80351	6.65654	1.79503	3.70832	0.000208637	0.00154999
ENSG00000256654.3	AC005906.2	processed_transcript	75.1352	9.62818	1.49771	6.42862	1.28767e-10	1.97219e-09	85.7355	4.43973	0.540549	8.21337	2.15057e-16	9.00126e-15
ENSG00000245648.1	AC022075.1	antisense	190.103	6.33879	0.563537	11.2482	2.36283e-29	1.74946e-27	221.503	3.63133	0.359912	10.0895	6.14768e-24	4.38087e-22
ENSG00000255745.1	AC023796.1	lincRNA	124.525	2.71096	0.415069	6.53135	6.51793e-11	1.04406e-09	138.232	2.50722	0.41416	6.05375	1.41509e-09	2.81395e-08
ENSG00000245614.3	DDX11-AS1	antisense	53.5489	-1.33845	0.500412	-2.67469	0.00747991	0.0248968	93.8041	-2.21915	0.453815	-4.88998	1.00845e-06	1.26207e-05
ENSG00000257261.5	AC008014.1	lincRNA	483.664	1.90889	0.233064	8.19041	2.60344e-16	7.31298e-15	616.413	1.05613	0.268022	3.94044	8.13314e-05	0.000675483
ENSG00000272369.1	AC008035.1	lincRNA	112.264	1.98355	0.407022	4.87333	1.09733e-06	9.34345e-06	139.316	1.22682	0.392994	3.12171	0.00179801	0.0100196
ENSG00000268069.2	AC004466.1	antisense	45.7052	3.32977	0.620923	5.36261	8.203e-08	8.43741e-07	47.7015	4.27873	0.69294	6.17474	6.62706e-10	1.38458e-08
ENSG00000276691.1	AC004466.3	antisense	10.7866	3.2458	1.19114	2.72496	0.00643099	0.0219498	10.8974	5.47797	1.70098	3.22049	0.00127972	0.00753369
ENSG00000257985.1	AC004801.4	antisense	20.2589	7.73618	1.61243	4.79784	1.60389e-06	1.32508e-05	22.0788	7.98262	1.60264	4.98092	6.32815e-07	8.25218e-06
ENSG00000257913.2	DDN-AS1	antisense	109.574	-1.92702	0.365082	-5.27831	1.30378e-07	1.3022e-06	115.911	-1.87318	0.407876	-4.59253	4.37901e-06	4.86976e-05
ENSG00000258057.5	BCDIN3D-AS1	antisense	24.3985	2.92042	0.776128	3.7628	0.000168019	0.000913413	30.3423	1.77921	0.641651	2.77287	0.00555646	0.0258312
ENSG00000249641.2	HOXC13-AS	antisense	37.2143	8.6134	1.54203	5.58577	2.32667e-08	2.63486e-07	40.9916	6.43371	1.15703	5.56054	2.6894e-08	4.42459e-07
ENSG00000257345.2	LINC02413	lincRNA	255.719	-1.65482	0.271483	-6.09547	1.09113e-09	1.47691e-08	368.088	-2.16146	0.337936	-6.39606	1.59437e-10	3.57772e-09
ENSG00000257817.1	AC026765.2	lincRNA	33.8961	2.47365	0.649565	3.80816	0.000140003	0.000775338	33.39	3.87642	0.756609	5.12342	3.00046e-07	4.13491e-06
ENSG00000257683.1	LINC02463	lincRNA	44.9993	4.57939	0.733685	6.24162	4.33052e-10	6.13591e-09	56.1859	2.37475	0.522063	4.54878	5.39576e-06	5.87959e-05
ENSG00000248008.2	NRAV	antisense	255.68	1.04767	0.267236	3.92038	8.84109e-05	0.000513303	250.886	1.57823	0.317946	4.96384	6.91135e-07	8.92938e-06
ENSG00000241388.5	HNF1A-AS1	processed_transcript	463.15	-2.0936	0.232663	-8.99843	2.28976e-19	8.2854e-18	355.511	-1.43748	0.290813	-4.94297	7.69432e-07	9.87e-06
ENSG00000249267.6	LINC00939	lincRNA	19.3861	6.21024	1.60953	3.85842	0.000114123	0.00064553	24.2325	2.64229	0.755139	3.49908	0.000466865	0.00315021
ENSG00000274317.1	LINC02334	lincRNA	462.549	4.57668	0.284638	16.0789	3.58481e-58	9.76752e-56	485.296	8.40457	0.653835	12.8543	8.13844e-38	1.21859e-35
ENSG00000223685.5	LINC00571	lincRNA	60.6066	1.77388	0.481971	3.68047	0.000232804	0.00121634	66.3496	1.75927	0.488162	3.60387	0.000313513	0.00223032
ENSG00000275880.1	AL139385.1	antisense	38.0492	2.9448	0.646681	4.55371	5.27083e-06	3.96178e-05	50.3621	1.43016	0.522664	2.73628	0.00621381	0.0283887
ENSG00000233695.2	GAS6-AS1	antisense	637.502	7.01086	0.39341	17.8207	4.87966e-71	2.29235e-68	691.637	8.69701	0.608409	14.2947	2.36217e-46	5.45142e-44
ENSG00000258458.6	AL160314.2	processed_transcript	53.289	2.29402	0.50946	4.50284	6.70521e-06	4.92577e-05	151.221	-1.09066	0.358936	-3.03859	0.0023769	0.0126756
ENSG00000258457.5	AL132780.2	antisense	225.571	2.30474	0.29235	7.88349	3.18355e-15	8.10676e-14	265.116	1.75235	0.311245	5.63013	1.80076e-08	3.06068e-07
ENSG00000258474.1	LINC02313	lincRNA	74.0195	-1.99994	0.447479	-4.46934	7.84604e-06	5.69324e-05	105.88	-2.47298	0.422648	-5.85116	4.88143e-09	9.06216e-08
ENSG00000258897.1	EGLN3-AS1	antisense	28.1048	3.66121	0.802053	4.5648	4.99965e-06	3.77461e-05	29.3395	4.90441	0.941299	5.21025	1.88582e-07	2.70763e-06
ENSG00000258738.1	AL121603.2	antisense	304.727	-1.01325	0.266204	-3.80629	0.000141068	0.000780226	331.896	-1.01284	0.300454	-3.37103	0.000748879	0.00476792
ENSG00000258616.5	LINC02303	lincRNA	115.282	10.2434	1.49953	6.83107	8.42855e-12	1.49708e-10	125.835	8.03846	1.10442	7.27843	3.37721e-13	1.03729e-11
ENSG00000258592.1	AL391152.1	lincRNA	19.1871	6.19499	1.62336	3.81615	0.000135551	0.00075318	22.0192	3.85288	0.915055	4.21055	2.54755e-05	0.000239118
ENSG00000285966.1	AC007686.4	lincRNA	14.1802	3.31913	1.04963	3.16218	0.00156592	0.00652193	16.7435	2.41351	0.889037	2.71475	0.00663258	0.0299001
ENSG00000258602.1	LINC01629	lincRNA	335.913	7.53017	0.597157	12.61	1.85915e-36	2.12842e-34	368.115	6.51511	0.461745	14.1098	3.30723e-45	7.11055e-43
ENSG00000259163.1	AL096869.2	antisense	10.9372	6.84717	1.73794	3.93983	8.15394e-05	0.000477068	11.923	7.09398	1.71346	4.14016	3.47062e-05	0.000316202
ENSG00000258572.1	AL133467.1	lincRNA	11.4409	2.66473	1.11716	2.38528	0.0170659	0.0496331	10.9973	5.51737	1.70329	3.23924	0.00119848	0.00712545
ENSG00000247092.6	SNHG10	antisense	620.424	-1.51013	0.250551	-6.02723	1.66798e-09	2.19765e-08	572.057	-1.17171	0.29867	-3.92308	8.74234e-05	0.000720792
ENSG00000258383.1	AL132819.1	lincRNA	9.87129	6.69761	1.77124	3.78131	0.000156003	0.000854566	10.7457	6.94241	1.74354	3.98179	6.83984e-05	0.000580682
ENSG00000258498.8	DIO3OS	lincRNA	16.5176	7.44293	1.64675	4.51977	6.19074e-06	4.58741e-05	21.0963	2.55238	0.792138	3.22214	0.00127236	0.00750089
ENSG00000278626.1	AC023310.4	lincRNA	73.393	9.59239	1.50356	6.37979	1.77326e-10	2.6635e-09	80.3751	7.39852	1.10792	6.67782	2.42522e-11	5.98101e-10
ENSG00000260409.1	AC012414.5	lincRNA	17.9724	4.0268	1.07094	3.76007	0.000169866	0.00092106	20.6694	3.09523	0.856667	3.61311	0.000302551	0.00216212
ENSG00000247765.2	AC068446.2	lincRNA	18.6465	5.13328	1.25507	4.09002	4.31337e-05	0.000267288	21.9543	3.19087	0.839102	3.80272	0.000143116	0.00111251
ENSG00000225930.4	LINC02249	lincRNA	228.766	1.93581	0.301416	6.4224	1.34139e-10	2.0487e-09	292.838	1.05355	0.303007	3.47699	0.000507076	0.00338432
ENSG00000259418.1	AC091117.2	antisense	10.7863	6.82346	1.76635	3.86304	0.000111986	0.000633969	12.194	4.62431	1.3772	3.35777	0.000785743	0.00496119
ENSG00000259178.1	AC023906.2	lincRNA	59.4327	6.83202	1.11112	6.14877	7.80864e-10	1.07891e-08	64.6625	7.09427	1.11854	6.34246	2.26128e-10	5.00287e-09
ENSG00000274383.1	AC103691.1	antisense	55.372	2.08148	0.495997	4.19655	2.71017e-05	0.000175277	65.0834	1.59541	0.473443	3.3698	0.000752218	0.00478676
ENSG00000246877.1	DNM1P35	antisense	65.965	2.80518	0.485315	5.78013	7.46443e-09	9.03926e-08	77.1237	2.14191	0.509782	4.20162	2.6501e-05	0.000247757
ENSG00000260288.3	AC019294.2	processed_transcript	8.76628	5.04215	1.79651	2.80664	0.00500619	0.0177355	10.1702	3.30959	1.22409	2.70371	0.00685695	0.0307627
ENSG00000259362.2	AC046168.1	lincRNA	93.0873	5.46169	0.626079	8.72365	2.69387e-18	8.92941e-17	100.878	5.90701	0.667594	8.8482	8.89382e-19	4.39537e-17
ENSG00000259291.2	ZNF710-AS1	antisense	166.682	3.06522	0.340067	9.01359	1.99427e-19	7.24503e-18	178.946	3.28024	0.39875	8.22629	1.93096e-16	8.13621e-15
ENSG00000261054.1	AC036108.2	antisense	61.3199	1.94192	0.480006	4.04562	5.21839e-05	0.00031816	60.413	2.85906	0.523021	5.46644	4.59176e-08	7.25538e-07
ENSG00000260778.5	AC009065.4	lincRNA	60.9751	1.59023	0.465496	3.4162	0.000635007	0.00295964	69.1088	1.37526	0.485071	2.83518	0.00458005	0.0220457
ENSG00000269937.1	AC093525.7	antisense	154.613	1.25882	0.337498	3.72985	0.000191594	0.00102521	147.629	2.04393	0.389189	5.25176	1.50651e-07	2.20328e-06
ENSG00000205913.6	SRRM2-AS1	antisense	300.171	2.68191	0.277557	9.66256	4.34875e-22	1.97484e-20	319.46	2.97044	0.335556	8.8523	8.57353e-19	4.24542e-17
ENSG00000277369.1	AC010654.1	lincRNA	129.66	1.33587	0.373185	3.57966	0.000344047	0.00171941	148.491	1.09862	0.391955	2.80292	0.00506418	0.0239679
ENSG00000260009.1	LINC02130	lincRNA	49.2568	2.81006	0.619415	4.53663	5.71604e-06	4.26698e-05	50.6147	3.73027	0.610118	6.11401	9.71556e-10	1.97571e-08
ENSG00000261357.1	AC099518.2	lincRNA	112.305	4.11498	1.18791	3.46405	0.00053211	0.00253203	132.61	2.75837	0.449325	6.13893	8.30776e-10	1.71156e-08
ENSG00000275441.1	AC020765.2	antisense	20.5532	-2.03312	0.769383	-2.64253	0.00822886	0.0270004	23.9324	-2.15418	0.768405	-2.80345	0.00505598	0.0239336
ENSG00000277999.1	AC009093.6	lincRNA	105.599	1.37261	0.36688	3.74132	0.000183057	0.000985138	94.3734	2.86988	0.469314	6.11505	9.65259e-10	1.96608e-08
ENSG00000198106.8	AC025279.1	processed_transcript	31.6109	2.03794	0.644336	3.16285	0.00156231	0.0065079	30.1814	3.44289	0.767944	4.48326	7.35123e-06	7.81904e-05
ENSG00000260852.1	FBXL19-AS1	antisense	470.312	-1.21928	0.233045	-5.23194	1.67743e-07	1.64111e-06	489.104	-1.11997	0.307365	-3.64377	0.000268678	0.00193949
ENSG00000261359.2	PYCARD-AS1	antisense	38.9175	4.15795	0.727604	5.71458	1.09976e-08	1.29783e-07	46.0202	2.77989	0.580602	4.78795	1.68494e-06	2.00685e-05
ENSG00000260605.1	AC027688.1	lincRNA	18.4026	-2.61319	0.873281	-2.99238	0.0027681	0.0106755	44.0024	-3.86532	0.683346	-5.65646	1.5453e-08	2.65338e-07
ENSG00000260963.1	AC026462.3	lincRNA	27.9745	-2.82066	0.74265	-3.7981	0.000145807	0.000803559	73.088	-4.18114	0.587704	-7.11436	1.12436e-12	3.22134e-11
ENSG00000261804.1	AC007342.4	lincRNA	142.894	10.5538	1.48285	7.11726	1.10093e-12	2.16584e-11	156.013	8.35996	1.08445	7.70892	1.26883e-14	4.42071e-13
ENSG00000262714.1	AC007342.5	lincRNA	182.629	10.9078	1.47982	7.37102	1.69321e-13	3.6908e-12	200.416	6.90237	0.65141	10.596	3.10837e-26	2.65054e-24
ENSG00000275383.1	AC126773.4	lincRNA	21.5274	2.0735	0.761034	2.72459	0.0064382	0.0219716	23.3863	2.09028	0.737081	2.83589	0.00456977	0.0220089
ENSG00000261348.1	LINC02136	lincRNA	12.2206	7.00623	1.71215	4.09205	4.27568e-05	0.000265073	13.3103	7.2518	1.69082	4.28892	1.79543e-05	0.000174043
ENSG00000261170.1	AC009053.3	antisense	17.3679	2.49983	0.960541	2.60253	0.0092539	0.0297512	18.8675	2.50301	0.8436	2.96706	0.00300665	0.0154446
ENSG00000278214.1	LINC02139	lincRNA	34.7593	8.51604	1.5475	5.50309	3.73187e-08	4.07381e-07	43.4822	2.78222	0.600499	4.63318	3.60087e-06	4.06188e-05
ENSG00000261273.1	AC138512.1	lincRNA	13.1782	2.91648	1.04942	2.77913	0.0054505	0.0191181	13.3754	4.20386	1.23384	3.40713	0.000656487	0.0042485
ENSG00000224888.4	AC138028.2	antisense	18.9221	3.78294	1.01671	3.72076	0.000198627	0.00105972	20.8835	3.54121	0.880628	4.02123	5.78939e-05	0.00050097
ENSG00000261373.1	VPS9D1-AS1	antisense	29.5446	4.45249	0.877279	5.07534	3.868e-07	3.5604e-06	31.4374	5.45937	1.03643	5.2675	1.38292e-07	2.03673e-06
ENSG00000186594.14	MIR22HG	lincRNA	653.655	1.58944	0.212918	7.46505	8.3265e-14	1.86726e-12	779.549	1.13093	0.265396	4.26131	2.03237e-05	0.000194167
ENSG00000262445.3	AC099684.2	antisense	149.934	1.99957	0.361079	5.53776	3.06358e-08	3.40282e-07	163.307	2.01614	0.377667	5.33842	9.37588e-08	1.40974e-06
ENSG00000228133.2	AC099684.1	antisense	30.4241	3.01863	0.714991	4.22191	2.42236e-05	0.00015824	34.0644	2.71748	0.650847	4.1753	2.97596e-05	0.000273813
ENSG00000262903.1	AC027796.4	antisense	188.769	2.85478	0.331591	8.60934	7.34835e-18	2.3445e-16	220.994	2.1761	0.358956	6.06232	1.34173e-09	2.68292e-08
ENSG00000178977.3	LINC00324	lincRNA	244.671	4.42913	0.344508	12.8564	7.91883e-38	9.85226e-36	282.278	3.21395	0.348031	9.23467	2.59076e-20	1.42918e-18
ENSG00000276399.1	AC209154.1	lincRNA	5.28441	5.79639	2.00641	2.88894	0.00386543	0.0142326	5.75404	6.04154	1.95377	3.09225	0.00198643	0.0108888
ENSG00000277969.1	AC006449.6	lincRNA	192.311	-1.85766	0.297	-6.25473	3.98195e-10	5.67745e-09	281.527	-2.38009	0.313422	-7.59388	3.10478e-14	1.04413e-12
ENSG00000266469.1	AC005288.1	antisense	28.1673	3.01046	0.758092	3.9711	7.15424e-05	0.000423028	34.2042	1.97259	0.653485	3.01857	0.00253975	0.0133767
ENSG00000266208.1	AC080112.1	antisense	726.128	2.07155	0.232289	8.91801	4.74734e-19	1.6712e-17	814.797	1.87428	0.293232	6.3918	1.63945e-10	3.6756e-09
ENSG00000197291.8	RAMP2-AS1	lincRNA	61.3102	-1.33226	0.457957	-2.90913	0.00362435	0.0134945	122.098	-2.43667	0.396438	-6.14641	7.92551e-10	1.63818e-08
ENSG00000224505.2	AC138150.1	antisense	86.6618	2.65115	0.475767	5.57238	2.51282e-08	2.8292e-07	97.8051	2.30171	0.472945	4.86676	1.13442e-06	1.4009e-05
ENSG00000244649.4	LINC02086	lincRNA	432.805	9.12309	0.866976	10.5229	6.7761e-26	4.06671e-24	473.743	7.25819	0.491759	14.7596	2.66717e-49	6.8462e-47
ENSG00000249906.1	AC006487.1	antisense	30.0425	5.24141	1.0497	4.99324	5.93753e-07	5.28175e-06	33.8454	4.10445	0.812838	5.04953	4.4289e-07	5.93864e-06
ENSG00000246640.1	PICART1	lincRNA	8.14405	6.41732	1.86247	3.44559	0.000569808	0.00269027	9.31693	4.21639	1.46504	2.878	0.00400206	0.0197202
ENSG00000250286.1	AC021491.2	processed_transcript	187.786	2.20479	0.320875	6.87116	6.36813e-12	1.14153e-10	204.104	2.23576	0.353997	6.31576	2.68836e-10	5.90103e-09
ENSG00000247011.2	AC005920.1	lincRNA	95.8692	1.36613	0.38352	3.56208	0.000367927	0.00182903	97.2629	1.77714	0.418843	4.24297	2.20583e-05	0.000209151
ENSG00000264672.5	SEPT4-AS1	antisense	22.5357	7.89045	1.59641	4.94262	7.70805e-07	6.72283e-06	25.2684	5.12085	1.05422	4.85747	1.18894e-06	1.45891e-05
ENSG00000224738.1	AC099850.1	antisense	24.4794	-1.73268	0.699551	-2.47685	0.0132548	0.0402533	40.5263	-2.47529	0.604774	-4.09293	4.25964e-05	0.000379566
ENSG00000259349.1	AC011921.1	antisense	56.6108	2.65842	0.51815	5.13061	2.88804e-07	2.71066e-06	70.3664	1.63232	0.463636	3.52069	0.000430418	0.00293897
ENSG00000187013.4	C17orf82	lincRNA	30.3244	2.28848	0.661852	3.45768	0.000544843	0.00258539	31.7706	2.67661	0.670267	3.99334	6.51489e-05	0.000555721
ENSG00000263489.1	AC127029.2	lincRNA	3.88933	5.35264	2.18051	2.45476	0.0140978	0.0424025	4.2293	5.59586	2.11236	2.6491	0.00807058	0.0352939
ENSG00000266402.3	SNHG25	lincRNA	48.0381	-1.86524	0.522149	-3.57223	0.000353953	0.00176501	46.7106	-1.65272	0.565503	-2.92256	0.00347169	0.0175046
ENSG00000278730.1	AC005332.6	lincRNA	1366.79	1.17473	0.18828	6.23928	4.3959e-10	6.22531e-09	1507.58	1.12144	0.25022	4.4818	7.40159e-06	7.85931e-05
ENSG00000274561.1	AC005332.3	lincRNA	119.438	1.34082	0.386572	3.4685	0.000523375	0.00249482	130.418	1.32777	0.426847	3.11065	0.00186675	0.0103318
ENSG00000277728.1	AC097641.2	antisense	417.037	5.19171	0.318479	16.3016	9.61487e-60	2.72892e-57	459.714	4.68917	0.328494	14.2748	3.14282e-46	7.05871e-44
ENSG00000177338.13	LINC00469	lincRNA	165.115	9.31868	1.46795	6.34809	2.18007e-10	3.21431e-09	180.156	8.56894	1.07327	7.98393	1.41747e-15	5.46042e-14
ENSG00000265342.1	AC011933.3	antisense	16.277	3.00857	1.02419	2.93752	0.00330853	0.0124652	18.5951	2.46148	0.879462	2.79885	0.00512848	0.0242338
ENSG00000267128.1	RNF157-AS1	antisense	346.411	5.72028	0.377903	15.1369	9.24589e-52	1.95289e-49	380.125	5.3327	0.369143	14.4462	2.64981e-47	6.22953e-45
ENSG00000267719.1	LINC02078	lincRNA	20.5548	7.75824	1.61004	4.81866	1.44528e-06	1.20464e-05	22.8621	5.58623	1.23428	4.5259	6.01379e-06	6.49536e-05
ENSG00000261924.1	AC127496.1	antisense	219.357	11.174	1.46969	7.60296	2.89443e-14	6.72906e-13	240.328	7.98313	0.788386	10.1259	4.24007e-24	3.07374e-22
ENSG00000262877.4	AC110285.2	lincRNA	113.752	-1.51339	0.360329	-4.20003	2.66881e-05	0.000172889	38.4867	2.32642	0.66474	3.49974	0.000465705	0.00314492
ENSG00000264575.1	LINC00526	lincRNA	223.801	-1.74054	0.301733	-5.76849	7.99829e-09	9.64717e-08	200.968	-1.3639	0.353747	-3.85558	0.000115454	0.000921984
ENSG00000283294.1	AP005212.4	processed_transcript	161.27	3.26144	0.408409	7.98571	1.3972e-15	3.67112e-14	172.609	3.52607	0.432328	8.156	3.4629e-16	1.41641e-14
ENSG00000260457.2	AC027458.1	lincRNA	4.9885	5.70898	2.08929	2.73249	0.00628567	0.0215347	5.40914	5.94813	2.03482	2.92318	0.00346477	0.0174732
ENSG00000282393.1	AC016588.2	lincRNA	45.5579	1.96004	0.556616	3.52135	0.000429357	0.00209354	50.9816	1.77786	0.547306	3.24838	0.00116064	0.00692336
ENSG00000267751.5	AC009005.1	antisense	66.0116	-2.09331	0.498606	-4.19833	2.68894e-05	0.000174027	73.9314	-2.1403	0.541558	-3.95212	7.74606e-05	0.000647564
ENSG00000267317.2	AC027307.2	antisense	211.461	1.1979	0.294436	4.06846	4.7324e-05	0.000291464	204.658	1.87354	0.340953	5.49501	3.90697e-08	6.2519e-07
ENSG00000267073.1	AC005256.1	lincRNA	23.7156	2.49428	0.858712	2.90467	0.00367638	0.0136546	26.0266	2.42671	0.804289	3.01721	0.00255116	0.0134284
ENSG00000267551.3	AC005264.1	antisense	40.1976	7.27305	1.52808	4.75961	1.93964e-06	1.57712e-05	43.8218	7.52002	1.50661	4.99135	5.99587e-07	7.83919e-06
ENSG00000267106.6	ZNF561-AS1	processed_transcript	160.484	2.36747	0.3405	6.95293	3.57769e-12	6.61338e-11	208.29	1.24605	0.356254	3.49763	0.000469405	0.00316395
ENSG00000266904.5	LINC00663	lincRNA	77.5671	3.02941	0.538436	5.62632	1.84096e-08	2.11025e-07	80.6344	3.83459	0.531117	7.21987	5.20367e-13	1.54909e-11
ENSG00000268001.1	CARD8-AS1	antisense	30.7167	-1.99306	0.637511	-3.12631	0.00177013	0.00726475	45.707	-2.53436	0.57077	-4.44025	8.9855e-06	9.30548e-05
ENSG00000268108.1	AC008687.2	antisense	163.192	7.71334	0.889641	8.67018	4.31443e-18	1.40448e-16	177.205	9.54311	1.45478	6.55985	5.38619e-11	1.27941e-09
ENSG00000268287.1	AC008687.3	lincRNA	164.26	8.30817	1.06308	7.81515	5.48968e-15	1.35119e-13	179.076	8.55462	1.07182	7.98136	1.44728e-15	5.55824e-14
ENSG00000267577.1	AC010327.3	antisense	9.10428	6.58497	1.79632	3.66582	0.00024655	0.0012786	11.1542	3.05945	1.12687	2.71501	0.00662732	0.0298871
ENSG00000277287.1	AL109976.1	lincRNA	569.489	3.60776	0.249488	14.4607	2.1465e-47	3.82259e-45	595.582	4.73532	0.317638	14.9079	2.92802e-50	8.0059e-48
ENSG00000227906.7	SNAP25-AS1	antisense	34.7776	-1.91565	0.620044	-3.08954	0.00200466	0.00807167	118.48	-3.79158	0.449658	-8.43215	3.39361e-17	1.51091e-15
ENSG00000213742.6	ZNF337-AS1	antisense	524.081	2.54069	0.240469	10.5656	4.30423e-26	2.60616e-24	616.507	1.91528	0.273468	7.00369	2.49312e-12	6.87657e-11
ENSG00000278383.1	AL031673.1	antisense	57.6045	2.5285	0.504593	5.01097	5.41561e-07	4.86192e-06	72.539	1.48552	0.467096	3.18034	0.00147103	0.00846576
ENSG00000175170.15	FAM182B	lincRNA	343.761	3.89126	0.286299	13.5916	4.49121e-42	6.83643e-40	369.638	4.24405	0.332275	12.7727	2.32912e-37	3.34794e-35
ENSG00000277692.1	AL121583.1	lincRNA	15.4185	3.79866	1.0735	3.53859	0.000402267	0.00197987	18.9234	2.25583	0.822632	2.74221	0.00610269	0.0279522
ENSG00000277301.1	AL034550.2	antisense	42.3334	2.93531	0.600507	4.88806	1.01835e-06	8.73374e-06	44.7367	3.37347	0.640401	5.26774	1.38111e-07	2.03526e-06
ENSG00000226812.2	AL117382.1	antisense	46.9162	-2.9576	0.60524	-4.88667	1.02558e-06	8.78322e-06	69.0483	-3.4454	0.565565	-6.09196	1.11539e-09	2.25543e-08
ENSG00000271984.1	AL008726.1	antisense	1154.22	8.80061	0.498644	17.6491	1.0342e-69	4.54499e-67	1261.22	7.98768	0.408543	19.5516	3.99686e-85	3.72374e-82
ENSG00000236028.1	AL354766.2	lincRNA	89.1195	9.87175	1.51031	6.53625	6.30801e-11	1.01401e-09	96.8616	10.1146	1.51521	6.67534	2.4666e-11	6.07117e-10
ENSG00000237595.4	LINC01275	lincRNA	74.8533	2.82294	0.466052	6.05714	1.38567e-09	1.84894e-08	94.0661	1.66409	0.433765	3.83638	0.000124864	0.000986788
ENSG00000271774.1	AL109930.1	antisense	88.0899	1.79288	0.456122	3.9307	8.4698e-05	0.000493745	99.4666	1.56975	0.431847	3.63497	0.000278012	0.00200212
ENSG00000259723.1	AL354993.2	antisense	172.95	2.49435	0.318388	7.83431	4.71433e-15	1.17522e-13	195.481	2.18178	0.334903	6.51467	7.28505e-11	1.69838e-09
ENSG00000273812.2	BX640514.2	lincRNA	4.40268	5.53076	2.11649	2.61317	0.00897061	0.0290771	4.78422	5.77299	2.05524	2.80892	0.00497084	0.0235921
ENSG00000275620.1	AL121827.2	antisense	388.501	7.74298	0.598298	12.9417	2.61869e-38	3.31867e-36	422.05	12.2401	1.47272	8.31125	9.46963e-17	4.09998e-15
ENSG00000280213.1	UCKL1-AS1	antisense	43.7341	1.69152	0.53913	3.13749	0.001704	0.0070379	44.8095	2.10639	0.559203	3.76678	0.000165369	0.00126018
ENSG00000280018.3	CU634019.6	lincRNA	45.2248	-1.35339	0.521629	-2.59454	0.00947178	0.0303621	56.9354	-1.633	0.499249	-3.27092	0.00107197	0.00647571
ENSG00000260583.1	AP000223.1	antisense	46.002	1.93063	0.532173	3.62783	0.000285815	0.00145999	48.7247	2.14176	0.536646	3.99101	6.57935e-05	0.000560649
ENSG00000238197.5	PAXBP1-AS1	antisense	59.1253	3.02743	0.518385	5.84013	5.21602e-09	6.44539e-08	82.8695	1.17076	0.423593	2.76389	0.00571166	0.0264247
ENSG00000232539.1	LINC00945	lincRNA	3.85309	5.34033	2.17896	2.45086	0.0142516	0.0427283	4.1943	5.58505	2.10986	2.64712	0.00811815	0.0354412
ENSG00000286153.1	AP000331.1	antisense	45.8751	2.54447	0.55405	4.59248	4.38004e-06	3.34763e-05	45.8439	3.72472	0.672431	5.53919	3.03869e-08	4.94747e-07
ENSG00000235888.2	AF064858.1	lincRNA	61.8754	1.71861	0.468776	3.66616	0.000246224	0.00127734	74.7154	1.16973	0.46365	2.52288	0.0116398	0.0478585
ENSG00000225431.1	LINC01671	lincRNA	6.93918	6.19436	1.89941	3.2612	0.0011094	0.00482873	7.58868	6.44566	1.85831	3.46855	0.000523267	0.00347933
ENSG00000215458.8	AATBC	antisense	459.197	7.98327	0.596421	13.3853	7.37064e-41	1.06603e-38	499.735	10.044	1.06118	9.4649	2.93834e-21	1.72293e-19
ENSG00000227039.6	ITGB2-AS1	antisense	23.741	4.46179	0.97898	4.55759	5.17431e-06	3.89568e-05	26.3202	3.93086	0.858373	4.57944	4.66227e-06	5.14835e-05
ENSG00000271127.1	AP000526.1	sense_intronic	98.7077	1.13438	0.401803	2.82324	0.00475414	0.0170039	101.142	1.44384	0.428101	3.37266	0.000744471	0.00474586
ENSG00000274422.1	AC245060.5	lincRNA	468.415	1.88594	0.292954	6.43766	1.21332e-10	1.86881e-09	516.228	1.80944	0.303106	5.96965	2.37756e-09	4.55851e-08
ENSG00000224277.5	AP000345.1	antisense	13.8753	7.1919	1.68258	4.27432	1.91718e-05	0.000127856	15.4016	5.99159	1.63003	3.67575	0.000237147	0.00173565
ENSG00000268812.3	AC004264.1	antisense	60.4748	1.7037	0.475199	3.58523	0.000336775	0.00168794	51.1889	6.15877	0.970171	6.34813	2.17945e-10	4.83885e-09
ENSG00000272720.1	AL022322.1	lincRNA	23.1157	6.46783	1.58953	4.06902	4.72109e-05	0.000290885	31.187	1.9913	0.667182	2.98465	0.00283904	0.0147037
ENSG00000235513.1	AL035681.1	antisense	53.7511	5.094	1.61209	3.15987	0.00157839	0.00656986	58.3355	5.33345	0.749973	7.11153	1.14764e-12	3.28428e-11
ENSG00000237037.9	NDUFA6-DT	processed_transcript	109.285	1.99134	0.370071	5.38096	7.40908e-08	7.70222e-07	112.879	2.4227	0.412635	5.8713	4.32397e-09	8.06895e-08
ENSG00000260708.1	AL118516.1	antisense	130.801	-1.00567	0.343917	-2.92416	0.00345382	0.0129338	180.55	-1.48862	0.364202	-4.08735	4.3633e-05	0.000387841
ENSG00000285756.1	BX890604.2	lincRNA	1082.5	1.06526	0.193161	5.5149	3.48982e-08	3.83191e-07	1077.94	1.51652	0.251593	6.02768	1.66334e-09	3.27397e-08
ENSG00000224294.1	PINCR	lincRNA	699.502	5.8265	0.330599	17.6241	1.60975e-69	6.85325e-67	748.253	13.0656	1.47361	8.86642	7.55353e-19	3.74771e-17
ENSG00000285899.1	AL023574.1	lincRNA	37.2337	3.46629	0.71226	4.86661	1.13526e-06	9.62132e-06	37.6372	6.29269	1.1708	5.3747	7.67106e-08	1.16949e-06
ENSG00000270069.1	MIR222HG	lincRNA	402.753	1.41586	0.291194	4.86227	1.16045e-06	9.81771e-06	437.279	1.42933	0.330628	4.32307	1.53876e-05	0.000151083
ENSG00000269902.1	AC234772.2	lincRNA	97.8952	1.58186	0.420236	3.76422	0.000167068	0.000908423	103.011	1.79069	0.452842	3.95433	7.67495e-05	0.000642474
ENSG00000213468.6	FIRRE	processed_transcript	784.113	-1.08924	0.207431	-5.25111	1.51188e-07	1.48823e-06	826.689	-1.01621	0.260123	-3.90664	9.35874e-05	0.000766089
ENSG00000285018.1	AC245140.3	antisense	26.8395	2.35868	0.702795	3.35614	0.000790375	0.00359522	26.2251	3.86537	0.841499	4.59344	4.36008e-06	4.853e-05
ENSG00000231535.6	LINC00278	lincRNA	35.0799	4.43688	0.817573	5.42689	5.7346e-08	6.08216e-07	40.0891	3.35301	0.658406	5.09262	3.53152e-07	4.79932e-06
ENSG00000286050.1	AC012078.2	lincRNA	624.604	2.60666	0.23513	11.0861	1.46604e-28	1.02687e-26	584.948	10.2664	1.05816	9.70214	2.95251e-22	1.84294e-20
