# Supplementary material for: TP53-inducible putative long noncoding RNAs encode functional polypeptides that suppress cell proliferation
Source: HighWire-hosted journal article supplement (doi:10.1101/gr.275831.121), 2022-05-24
Supplement: Supplemental_Table_S8.xlsx [file Supplemental_Table_S8.xlsx]

## Sheet: README
Supplemental Table S8: Overview of all MS-detected new microproteins.
Dataset shown in Fig. 4D-F, Supplemental Fig.S6A-C.

## Sheet: Protein
Number	Gene symbol	Protein sequence length (aa)	Mol. weight [kDa]	Unique peptide sequence	Peptide length (aa)	shotgun evidence (Yes/No)	PRM evidence (Yes/No)	Heavy-MRM evidence (Yes/No)
TP53LC02	AC010501.1	109	11.2	QAQPAGAAHSR	11	No	No	Yes
				WPASPLGVR	9	No	Yes	Yes
				GSGAGGGAGPGAAVSASPSGPR	22	No	Yes	Yes
TP53LC03	LINC00324	102	11.2	QSIVVDDSVR	10	No	No	Yes
				ESPGTVK	7	No	No	Yes
TP53LC04	AC022075.1	100	11.1	GQERPGIQGVPQLSFTR	17	Yes	No	No
				IYRPALPTSQHPAWQR	16	No	Yes	Yes
				NGTEDGAAGR	10	No	No	Yes
