# Supplementary material for: TP53-inducible putative long noncoding RNAs encode functional polypeptides that suppress cell proliferation
Source: HighWire-hosted journal article supplement (doi:10.1101/gr.275831.121), 2022-05-24
Supplement: Supplemental_Table_S9.xlsx [file Supplemental_Table_S9.xlsx]

## Sheet: README
Supplemental Table S9：Transcripts differentially expressed in stable TP53LC04-silenced HepG2 cells upon DNA damage treatment with ADR identified by the RNA-seq analysis.
"643 overlapped genes" Dataset indicates differentially expressed transcripts regulated by both TP53LC04 and TP53 in response to DNA damage.
"1211 TP53LC04 specific genes" Dataset indicates differentially expressed transcripts only dependent on TP53LC04 in response to DNA damage.
The table below indicates figures that the other tabs are corresponding to.
tab name	Figure
sh-TP5304-1 vs sh-LacZ in ADR	S12A
643 overlapped genes	S12B
1211 TP53LC04 dependent genes	S12B

## Sheet: sh-TP5304-1 vs  sh-LacZ in ADR
gene	log2FoldChange	logCPM	F	pvalue	genename	genetype
ENSG00000240409.1	1.44181	-1.45506	5.89681	0.0404696	MTATP8P1	unprocessed_pseudogene
ENSG00000272512.1	-1.44017	-0.681333	6.40006	0.034928	AL645608.7	lincRNA
ENSG00000217801.10	1.05356	2.73465	7.34791	0.0263315	AL390719.1	transcribed_unprocessed_pseudogene
ENSG00000169885.10	-1.936	0.536524	17.6495	0.00291076	CALML6	protein_coding
ENSG00000178821.13	-1.44344	4.29763	24.3087	0.00110815	TMEM52	protein_coding
ENSG00000149527.18	1.15163	0.772468	6.40753	0.0348473	PLCH2	protein_coding
ENSG00000272235.1	2.11505	-0.711919	7.14737	0.0279051	AL590438.1	lincRNA
ENSG00000227589.1	2.15634	-0.573279	24.5728	0.00101917	AL136528.1	antisense
ENSG00000116254.18	-1.07791	3.98201	6.82882	0.0306573	CHD5	protein_coding
ENSG00000158292.7	-1.27272	3.0222	6.98442	0.0292721	GPR153	protein_coding
ENSG00000269978.1	-1.19536	0.0439772	9.53322	0.0144249	AL359881.1	lincRNA
ENSG00000188807.13	-1.19472	5.69407	8.69226	0.018226	TMEM201	protein_coding
ENSG00000204624.8	-2.27367	1.13292	11.9068	0.00852446	DISP3	protein_coding
ENSG00000235643.1	-3.26939	-0.0656655	36.1656	0.000303337	LINC01647	lincRNA
ENSG00000162490.7	-1.68128	3.17687	6.28192	0.0362352	DRAXIN	protein_coding
ENSG00000175147.12	1.36824	0.590797	8.6484	0.0184361	TMEM51-AS1	antisense
ENSG00000237301.1	-1.61698	-0.879621	6.41673	0.0347483	AL121992.1	antisense
ENSG00000173641.17	-1.85116	-0.533149	7.70593	0.0237906	HSPB7	protein_coding
ENSG00000227684.2	-1.68604	-0.250081	12.6308	0.00731795	CROCCP4	transcribed_unprocessed_pseudogene
ENSG00000009709.12	-3.4628	-1.93398	8.8187	0.0176368	PAX7	protein_coding
ENSG00000188257.11	3.36184	7.04066	22.6427	0.00138179	PLA2G2A	protein_coding
ENSG00000227001.3	-1.36779	0.244861	16.1944	0.00359592	NBPF2P	unprocessed_pseudogene
ENSG00000133216.16	-2.18076	1.45112	18.8048	0.00241889	EPHB2	protein_coding
ENSG00000236810.5	1.323	0.0914049	11.2806	0.00960766	ELOA-AS1	antisense
ENSG00000184454.7	1.97958	-0.284694	5.49355	0.0467568	NCMAP	protein_coding
ENSG00000162430.17	-1.14634	6.3439	6.16551	0.0375846	SELENON	protein_coding
ENSG00000158022.6	-1.51951	-0.0174156	6.10151	0.0383536	TRIM63	protein_coding
ENSG00000158246.8	-1.51296	1.39684	11.3146	0.00970169	TENT5B	protein_coding
ENSG00000090020.11	-1.2004	6.1133	11.9384	0.0084668	SLC9A1	protein_coding
ENSG00000174950.11	-2.10772	-0.934488	6.43896	0.0345106	CD164L2	protein_coding
ENSG00000188060.7	1.0029	4.57033	20.3965	0.00189406	RAB42	protein_coding
ENSG00000116329.11	-1.45917	0.900836	9.64204	0.0143327	OPRD1	protein_coding
ENSG00000253304.2	-1.68564	2.5175	28.2142	0.000689616	TMEM200B	protein_coding
ENSG00000084628.10	-1.24756	0.602241	5.78964	0.0424001	NKAIN1	protein_coding
ENSG00000121769.7	-1.27827	-0.637257	8.9539	0.0167117	FABP3	protein_coding
ENSG00000134668.12	-1.80105	0.462746	5.44353	0.0475481	SPOCD1	protein_coding
ENSG00000160097.18	-1.95135	1.80398	11.9064	0.00852512	FNDC5	protein_coding
ENSG00000142920.17	-1.57085	1.48911	19.2816	0.00224642	AZIN2	protein_coding
ENSG00000189280.3	-2.39119	-1.22871	8.98185	0.0169114	GJB5	protein_coding
ENSG00000116544.12	-1.68871	-0.397137	6.80436	0.0308826	DLGAP3	protein_coding
ENSG00000116885.18	-1.12743	1.75736	9.58731	0.0145268	OSCP1	protein_coding
ENSG00000232273.1	2.02546	-2.02538	5.42377	0.0477186	FTH1P1	processed_pseudogene
ENSG00000185668.7	-2.6576	5.34707	32.0356	0.000455104	POU3F1	protein_coding
ENSG00000224592.5	-1.02322	2.86868	10.9591	0.0105072	AL139158.2	lincRNA
ENSG00000183682.8	-1.1695	1.51088	6.46371	0.0342483	BMP8A	protein_coding
ENSG00000116983.13	-3.87275	-1.70181	7.50542	0.0251734	HPCAL4	protein_coding
ENSG00000117010.17	1.06381	2.77582	17.5557	0.00284906	ZNF684	protein_coding
ENSG00000186409.16	-1.30745	0.557652	8.18037	0.0208806	CCDC30	protein_coding
ENSG00000117394.21	2.22889	9.30011	37.3219	0.000272653	SLC2A1	protein_coding
ENSG00000227533.5	2.77436	0.555263	23.0427	0.00130902	SLC2A1-AS1	lincRNA
ENSG00000283973.1	2.99034	-0.805973	7.95051	0.0222308	AC099795.1	lincRNA
ENSG00000117407.17	-1.71703	-1.27977	8.47418	0.0189588	ARTN	protein_coding
ENSG00000196517.11	-1.9574	2.60988	14.1758	0.00538218	SLC6A9	protein_coding
ENSG00000230615.6	-2.46707	0.708251	55.198	6.3632e-05	AL139220.2	lincRNA
ENSG00000225721.5	-2.44647	-1.99638	6.00806	0.0395126	AL592166.1	antisense
ENSG00000117461.15	-1.25891	4.28871	9.72464	0.0140459	PIK3R3	protein_coding
ENSG00000085999.12	-1.0643	3.80997	17.8882	0.00279958	RAD54L	protein_coding
ENSG00000162456.9	-2.70445	-1.85688	5.35726	0.0489533	KNCN	protein_coding
ENSG00000186564.5	-1.17248	0.679481	9.52416	0.0147549	FOXD2	protein_coding
ENSG00000279096.2	-4.87627	-0.959264	6.7502	0.0313888	AL356289.3	TEC
ENSG00000117834.12	1.2236	3.9531	19.5566	0.00215394	SLC5A9	protein_coding
ENSG00000085831.15	2.07368	3.39321	41.6746	0.000186848	TTC39A	protein_coding
ENSG00000157077.14	1.37623	5.02202	13.7915	0.00579694	ZFYVE9	protein_coding
ENSG00000226754.1	1.62498	-0.745196	6.79896	0.0309325	AL606760.1	antisense
ENSG00000169174.10	-1.47487	4.48847	23.2283	0.00127689	PCSK9	protein_coding
ENSG00000223956.2	2.37714	-1.20676	16.8706	0.00319706	LINC01767	lincRNA
ENSG00000187889.13	-1.01781	3.71764	9.33558	0.0154633	FYB2	protein_coding
ENSG00000021852.13	2.28157	2.33289	6.54324	0.0334227	C8B	protein_coding
ENSG00000234264.1	-2.43674	-1.41544	15.3486	0.00418632	DEPDC1-AS1	antisense
ENSG00000226088.1	-2.3827	-1.71707	7.25435	0.0270513	AL158839.1	antisense
ENSG00000137960.6	1.31621	5.40575	14.3231	0.00523315	GIPC2	protein_coding
ENSG00000137941.17	1.37001	-0.186059	5.61733	0.0448694	TTLL7	protein_coding
ENSG00000137975.8	-1.85292	0.656088	7.86744	0.0227457	CLCA2	protein_coding
ENSG00000117226.12	2.8959	1.31779	80.1268	1.59868e-05	GBP3	protein_coding
ENSG00000117228.10	1.12223	0.148562	7.67489	0.023927	GBP1	protein_coding
ENSG00000162645.13	2.73763	3.35142	54.1893	7.42188e-05	GBP2	protein_coding
ENSG00000226835.2	1.8552	-1.22299	7.70985	0.0237645	AC097059.1	lincRNA
ENSG00000172339.10	1.01645	2.89239	13.187	0.00653364	ALG14	protein_coding
ENSG00000099260.11	1.28171	4.22431	25.6713	0.000933123	PALMD	protein_coding
ENSG00000156869.13	1.49151	3.31477	8.26066	0.0204335	FRRS1	protein_coding
ENSG00000162631.18	-2.30188	-1.75191	8.57304	0.0185616	NTNG1	protein_coding
ENSG00000162636.16	-1.25551	2.66752	13.9106	0.00566424	FAM102B	protein_coding
ENSG00000215717.6	1.06598	4.87118	9.59751	0.0144903	TMEM167B	protein_coding
ENSG00000198758.10	1.3311	4.60666	32.4943	0.000434156	EPS8L3	protein_coding
ENSG00000197106.7	-1.7044	-1.05612	5.30152	0.0498894	SLC6A17	protein_coding
ENSG00000224965.1	-1.70563	-1.44265	6.40272	0.0347186	LINC02586	antisense
ENSG00000116396.14	-1.04646	4.73287	5.53294	0.0461454	KCNC4	protein_coding
ENSG00000177301.15	-2.4425	-1.19678	9.12814	0.0162927	KCNA2	protein_coding
ENSG00000260948.1	-1.35377	0.715792	10.0938	0.0128487	AL390195.2	sense_overlapping
ENSG00000243960.1	-1.7843	-0.971882	11.5852	0.00891436	AL390195.1	sense_overlapping
ENSG00000231346.5	-1.94589	-0.990689	8.6378	0.0184874	LINC01160	lincRNA
ENSG00000227811.2	-1.45244	0.714466	15.1029	0.00449512	INKA2-AS1	bidirectional_promoter_lncRNA
ENSG00000173212.4	1.27618	2.98636	16.5801	0.00348255	MAB21L3	protein_coding
ENSG00000221040.2	-1.73949	-1.79584	6.53683	0.0330442	RF00012	snoRNA
ENSG00000177173.5	1.43118	2.76585	25.5418	0.000948197	NAP1L4P1	processed_pseudogene
ENSG00000143061.17	-1.80485	1.93978	12.3307	0.00779024	IGSF3	protein_coding
ENSG00000092607.15	-1.53522	3.56739	35.6772	0.000317586	TBX15	protein_coding
ENSG00000226443.3	-1.62209	-0.161472	11.8881	0.00855871	GAPDHP32	processed_pseudogene
ENSG00000134240.11	-1.40866	-0.776565	5.97591	0.0399216	HMGCS2	protein_coding
ENSG00000232527.7	2.89596	-0.522462	7.91598	0.022443	AC245595.1	lincRNA
ENSG00000143127.13	1.80793	0.317232	12.5323	0.00746889	ITGA10	protein_coding
ENSG00000211451.12	1.91285	-0.735588	15.7659	0.00388106	GNRHR2	transcribed_unitary_pseudogene
ENSG00000201558.1	-2.1471	-1.58148	7.68142	0.0239544	RNVU1-6	snRNA
ENSG00000277406.2	2.16982	-1.7242	5.49051	0.0468043	SEC22B4P	transcribed_unprocessed_pseudogene
ENSG00000237188.5	1.99092	-1.43995	7.28923	0.0267801	AC242426.2	antisense
ENSG00000131781.13	2.86132	5.56795	14.8761	0.00471769	FMO5	protein_coding
ENSG00000226015.2	1.50802	2.38921	9.32451	0.0155062	CCT8P1	processed_pseudogene
ENSG00000162836.12	1.06708	4.48543	23.4125	0.00122956	ACP6	protein_coding
ENSG00000177144.7	-3.75728	-1.7612	15.148	0.00446507	NUDT4B	protein_coding
ENSG00000270276.2	2.67276	-0.20042	22.4555	0.00141759	HIST2H4B	protein_coding
ENSG00000014914.21	1.80592	2.22398	50.3836	8.85031e-05	MTMR11	protein_coding
ENSG00000143401.15	1.24809	5.21924	16.328	0.00363731	ANP32E	protein_coding
ENSG00000163131.11	1.13593	1.6643	8.62704	0.0185396	CTSS	protein_coding
ENSG00000213190.3	2.65694	2.95056	96.9965	8.06502e-06	MLLT11	protein_coding
ENSG00000237976.1	-1.77629	-0.786062	5.93954	0.0403908	AL391069.2	antisense
ENSG00000159409.14	-1.47692	2.54896	7.39735	0.0259609	CELF3	protein_coding
ENSG00000188643.11	1.28687	6.24715	31.3576	0.000488437	S100A16	protein_coding
ENSG00000160712.13	1.19576	5.6155	27.851	0.000719068	IL6R	protein_coding
ENSG00000163239.12	-2.62625	-1.89686	5.8935	0.0409948	TDRD10	protein_coding
ENSG00000231064.7	-3.25791	-2.04561	5.64947	0.0443951	AC234582.1	antisense
ENSG00000143627.19	1.85167	1.80391	34.8585	0.00033381	PKLR	protein_coding
ENSG00000272068.1	1.28214	2.03137	10.7564	0.0110042	AL365181.2	lincRNA
ENSG00000143320.9	-1.1903	2.47661	5.46245	0.0472467	CRABP2	protein_coding
ENSG00000224520.2	-1.56617	2.47749	10.5354	0.01158	KRT8P45	processed_pseudogene
ENSG00000183853.18	-2.18352	-0.606322	14.1105	0.00545001	KIRREL1	protein_coding
ENSG00000171786.6	-2.18371	-0.717079	15.9269	0.00388885	NHLH1	protein_coding
ENSG00000158764.7	-3.07689	-0.53611	22.1537	0.00147775	ITLN2	protein_coding
ENSG00000270149.5	-1.62572	-0.759579	8.37006	0.0198434	AL591806.3	protein_coding
ENSG00000186517.14	-1.31169	0.458295	8.19021	0.0208252	ARHGAP30	protein_coding
ENSG00000158869.11	1.94899	-0.167919	15.6045	0.00413181	FCER1G	protein_coding
ENSG00000132185.16	-1.8359	1.99229	8.96645	0.0169783	FCRLA	protein_coding
ENSG00000162745.10	-2.44935	-1.99548	7.05208	0.0285972	OLFML2B	protein_coding
ENSG00000188859.6	-1.71654	-1.62828	6.20251	0.0366855	FAM78B	protein_coding
ENSG00000143194.13	-1.34102	-0.175058	6.98284	0.0292858	MAEL	protein_coding
ENSG00000272205.1	-1.95483	-0.423406	10.1325	0.0127309	AL451050.2	lincRNA
ENSG00000198821.10	-2.27336	-0.807274	16.0725	0.00379039	CD247	protein_coding
ENSG00000143158.11	1.00755	4.29674	6.1324	0.03798	MPC2	protein_coding
ENSG00000143147.14	-1.11643	2.90155	9.06561	0.0165536	GPR161	protein_coding
ENSG00000116132.12	-2.13	-1.84788	6.14572	0.0378202	PRRX1	protein_coding
ENSG00000180999.11	1.7518	0.470812	12.976	0.00681806	C1orf105	protein_coding
ENSG00000117601.13	1.40101	5.22583	6.84652	0.0304956	SERPINC1	protein_coding
ENSG00000152092.16	-2.17226	-1.59016	6.42809	0.0346266	ASTN1	protein_coding
ENSG00000254154.8	1.56567	-0.559878	9.44281	0.0150553	CRYZL2P-SEC16B	processed_transcript
ENSG00000242193.11	2.09342	3.49616	40.5033	0.00020614	CRYZL2P	transcribed_unitary_pseudogene
ENSG00000116191.17	1.153	5.05302	8.05293	0.021616	RALGPS2	protein_coding
ENSG00000116194.13	4.35471	2.35816	35.508	0.000322715	ANGPTL1	protein_coding
ENSG00000135828.11	1.62007	0.329529	15.2619	0.00439531	RNASEL	protein_coding
ENSG00000198756.12	2.69207	4.54946	73.2673	2.4815e-05	COLGALT2	protein_coding
ENSG00000198860.12	1.31705	3.72425	12.4469	0.00760292	TSEN15	protein_coding
ENSG00000274702.1	1.9726	-1.45552	6.47859	0.0340919	AL357559.1	processed_pseudogene
ENSG00000285280.1	1.47315	0.532366	6.18375	0.0373689	AL390957.1	lincRNA
ENSG00000116741.8	1.62196	1.97383	6.20157	0.0371598	RGS2	protein_coding
ENSG00000116833.14	2.74277	2.45009	50.7096	9.39998e-05	NR5A2	protein_coding
ENSG00000174502.19	2.77525	0.156685	39.3492	0.000223581	SLC26A9	protein_coding
ENSG00000182795.13	1.1799	3.49082	8.53535	0.0189921	C1orf116	protein_coding
ENSG00000123843.13	1.79794	5.866	48.239	0.000112152	C4BPB	protein_coding
ENSG00000123838.11	2.16388	5.98816	24.8823	0.00102986	C4BPA	protein_coding
ENSG00000196352.15	1.38156	5.9053	11.9527	0.00844083	CD55	protein_coding
ENSG00000076356.7	1.20226	5.26986	8.48594	0.0192417	PLXNA2	protein_coding
ENSG00000196878.15	-2.02806	2.04504	7.80721	0.0231284	LAMB3	protein_coding
ENSG00000054392.13	-1.00937	5.41472	20.0736	0.00199256	HHAT	protein_coding
ENSG00000227764.1	2.93651	-0.810164	16.7709	0.00337088	LINC01693	lincRNA
ENSG00000117691.10	-1.15207	4.20183	8.7068	0.018157	NENF	protein_coding
ENSG00000143494.15	1.2086	1.29134	12.7679	0.00707795	VASH2	protein_coding
ENSG00000143353.12	1.05216	4.3087	14.0313	0.00553365	LYPLAL1	protein_coding
ENSG00000277007.1	1.17948	-0.210199	6.13128	0.0379934	AC096642.1	lincRNA
ENSG00000228536.2	3.33057	-1.63951	17.8257	0.00272311	LYPLAL1-AS1	lincRNA
ENSG00000282418.1	-2.43994	0.135711	16.9998	0.00324271	AC092811.2	lincRNA
ENSG00000143768.13	-1.60479	-0.683463	11.3365	0.00942151	LEFTY2	protein_coding
ENSG00000185155.11	2.42622	4.36156	31.359	0.000488366	MIXL1	protein_coding
ENSG00000143816.8	-1.85405	2.99869	6.3562	0.0354062	WNT9A	protein_coding
ENSG00000154342.6	-3.67673	-1.80338	13.8819	0.00569583	WNT3A	protein_coding
ENSG00000143632.14	-2.39482	1.30071	21.4778	0.00162454	ACTA1	protein_coding
ENSG00000177614.11	-1.98904	0.549895	8.10726	0.0212986	PGBD5	protein_coding
ENSG00000135773.13	-2.07865	1.55012	29.0533	0.000627117	CAPN9	protein_coding
ENSG00000182118.8	-1.06773	2.97415	25.2147	0.000938693	FAM89A	protein_coding
ENSG00000119283.15	-2.00753	0.785299	12.0128	0.00833302	TRIM67	protein_coding
ENSG00000135749.19	-1.25846	0.462641	12.7736	0.00691239	PCNX2	protein_coding
ENSG00000279261.2	1.25465	-0.267099	8.53114	0.0187994	AL360294.1	lincRNA
ENSG00000077585.14	1.69911	1.62262	15.6176	0.00412216	GPR137B	protein_coding
ENSG00000116977.18	1.46895	6.50824	20.052	0.00199898	LGALS8	protein_coding
ENSG00000223776.5	1.08567	1.86622	13.3307	0.00622385	LGALS8-AS1	antisense
ENSG00000230325.1	2.1042	0.0468768	9.28761	0.0156503	AL359921.1	antisense
ENSG00000117020.17	-1.49442	-0.243948	12.189	0.00786059	AKT3	protein_coding
ENSG00000135747.11	-2.87679	-1.75341	10.036	0.0130274	ZNF670-ZNF695	protein_coding
ENSG00000215795.2	-3.61872	-1.84217	13.0452	0.00672309	AL390728.2	processed_pseudogene
ENSG00000189292.16	1.22285	1.17326	16.7942	0.00323925	ALKAL2	protein_coding
ENSG00000236760.1	1.87699	-1.87046	6.05382	0.0384674	AC019118.2	lincRNA
ENSG00000223884.6	-1.6252	-1.66977	6.40057	0.0344706	AC068481.1	antisense
ENSG00000143797.12	-1.66909	0.522625	10.8717	0.010718	MBOAT2	protein_coding
ENSG00000151693.11	1.0161	5.44324	21.2862	0.00166943	ASAP2	protein_coding
ENSG00000272275.1	-2.21309	-1.33955	13.4628	0.00600664	AC092687.3	lincRNA
ENSG00000134323.12	2.43562	-0.102524	36.0319	0.000287387	MYCN	protein_coding
ENSG00000163032.11	1.40414	5.76746	9.29437	0.0156237	VSNL1	protein_coding
ENSG00000227210.1	1.56377	1.82957	15.7051	0.00405819	AC079145.1	antisense
ENSG00000132031.13	1.87675	7.93811	30.7386	0.000521569	MATN3	protein_coding
ENSG00000234378.1	2.87956	-1.91048	6.89942	0.0300187	AC098828.3	lincRNA
ENSG00000261012.2	1.84246	1.75745	21.2461	0.00167901	AC115619.1	lincRNA
ENSG00000119771.15	-2.53111	2.15716	20.4805	0.00187605	KLHL29	protein_coding
ENSG00000084710.14	-1.47804	2.41705	11.7109	0.00889303	EFR3B	protein_coding
ENSG00000115138.11	-2.64347	-1.89944	6.39048	0.0350317	POMC	protein_coding
ENSG00000157851.17	-2.54716	2.02728	14.3975	0.00515979	DPYSL5	protein_coding
ENSG00000229122.1	-1.59923	-0.369939	13.572	0.00587696	AGBL5-IT1	sense_intronic
ENSG00000138002.15	1.23125	2.52104	17.1505	0.00316167	IFT172	protein_coding
ENSG00000084734.9	2.71582	3.44433	100.439	7.64299e-06	GCKR	protein_coding
ENSG00000189350.12	-1.91935	-1.34017	5.43947	0.0476131	TOGARAM2	protein_coding
ENSG00000213626.13	-1.9041	2.917	8.14991	0.0210535	LBH	protein_coding
ENSG00000018699.13	1.11629	4.8094	13.6532	0.00595591	TTC27	protein_coding
ENSG00000049323.16	-1.32423	1.63202	5.93036	0.0405103	LTBP1	protein_coding
ENSG00000163171.7	-1.59167	2.50887	5.35425	0.0490033	CDC42EP3	protein_coding
ENSG00000205111.8	1.5239	-0.798876	6.57479	0.033102	CDKL4	protein_coding
ENSG00000152154.11	1.61713	1.26661	10.3481	0.012098	TMEM178A	protein_coding
ENSG00000143924.19	1.13162	8.52613	6.70826	0.031788	EML4	protein_coding
ENSG00000226087.1	-2.20539	-0.386574	8.40991	0.0196339	AC073283.2	lincRNA
ENSG00000184261.4	-1.96759	-0.558917	8.04471	0.0216646	KCNK12	protein_coding
ENSG00000214595.11	-1.24685	5.48543	24.9634	0.00101936	EML6	protein_coding
ENSG00000237522.1	1.48531	-0.0689375	14.4345	0.00496693	NONOP2	processed_pseudogene
ENSG00000162927.14	1.67744	4.80027	9.98156	0.0131987	PUS10	protein_coding
ENSG00000143952.20	1.07416	6.83879	5.9123	0.0407468	VPS54	protein_coding
ENSG00000223935.2	-1.70239	-1.30802	8.75054	0.0176211	LGALSL-DT	bidirectional_promoter_lncRNA
ENSG00000260101.1	1.64307	0.617133	14.4323	0.00512599	AC008074.2	lincRNA
ENSG00000115956.10	-1.66161	-0.950352	10.5427	0.0113012	PLEK	protein_coding
ENSG00000244617.2	-1.74353	0.118992	15.1934	0.0044505	ASPRV1	protein_coding
ENSG00000124374.9	-2.04595	0.196539	21.3909	0.00164472	PAIP2B	protein_coding
ENSG00000135638.13	-1.42003	4.19772	13.2509	0.00645035	EMX1	protein_coding
ENSG00000230964.1	-2.21947	0.498893	26.6763	0.000825751	AC233266.1	processed_pseudogene
ENSG00000261600.1	-1.67454	1.13143	11.2315	0.00988297	AC233266.2	lincRNA
ENSG00000155066.16	-2.3329	-0.526954	7.10634	0.0282416	PROM2	protein_coding
ENSG00000144191.11	-1.7267	-1.15832	9.60553	0.0141677	CNGA3	protein_coding
ENSG00000272902.2	1.05431	0.864192	6.0923	0.0384658	TBC1D8-AS1	lincRNA
ENSG00000115590.14	1.73281	0.59379	11.4112	0.00949645	IL1R2	protein_coding
ENSG00000115594.12	1.61719	5.42666	38.1536	0.000252954	IL1R1	protein_coding
ENSG00000115604.10	1.54817	-1.15091	5.50644	0.0465555	IL18R1	protein_coding
ENSG00000115641.19	2.14682	4.96964	31.5858	0.000476886	FHL2	protein_coding
ENSG00000225328.1	-3.60104	-0.918294	15.1418	0.00449264	LINC01594	antisense
ENSG00000175701.10	1.06214	2.89659	9.34989	0.015408	MTLN	protein_coding
ENSG00000153093.18	-1.41688	-0.400391	6.07879	0.0386313	ACOXL	protein_coding
ENSG00000204581.2	-1.53557	-1.13277	7.01576	0.0287301	ACOXL-AS1	antisense
ENSG00000144152.13	-2.52856	3.14228	14.9877	0.00462141	FBLN7	protein_coding
ENSG00000278962.1	-2.83541	0.357521	15.5695	0.00415782	AC092645.1	TEC
ENSG00000136689.18	1.08288	4.90703	21.1079	0.0017126	IL1RN	protein_coding
ENSG00000227359.1	-1.06179	0.896188	9.74539	0.0137179	AC017074.1	lincRNA
ENSG00000236255.1	-1.13207	2.50439	8.52181	0.0190601	AC009404.1	lincRNA
ENSG00000279227.1	1.04921	2.59354	11.8806	0.00857257	AC009303.4	TEC
ENSG00000125629.15	1.70062	7.03026	6.19457	0.0372418	INSIG2	protein_coding
ENSG00000163075.13	-1.98893	0.470797	7.55308	0.0248358	CFAP221	protein_coding
ENSG00000136717.15	1.13955	3.34695	10.1367	0.012718	BIN1	protein_coding
ENSG00000152076.18	-1.24056	1.53624	8.6964	0.0182063	CCDC74B	protein_coding
ENSG00000150540.14	1.12372	6.24402	8.96007	0.0170061	HNMT	protein_coding
ENSG00000230569.1	-2.82885	-1.44077	16.914	0.00317339	AC114763.2	lincRNA
ENSG00000168280.17	-1.81232	2.08007	18.5771	0.0025071	KIF5C	protein_coding
ENSG00000187123.15	-2.27831	-0.243039	13.815	0.00577042	LYPD6	protein_coding
ENSG00000115963.13	-1.77452	2.69646	9.9392	0.0133338	RND3	protein_coding
ENSG00000123609.10	2.42313	2.44047	40.1366	0.000212688	NMI	protein_coding
ENSG00000144278.15	-1.75813	1.45346	17.0082	0.00323817	GALNT13	protein_coding
ENSG00000123612.16	-1.41361	-0.0108911	9.55193	0.014654	ACVR1C	protein_coding
ENSG00000271924.1	1.64792	-1.97043	5.62289	0.0442891	RNA5SP108	rRNA_pseudogene
ENSG00000197635.10	1.61941	3.36562	30.2001	0.000552697	DPP4	protein_coding
ENSG00000184611.11	-1.64717	-0.566934	9.00153	0.0168265	KCNH7	protein_coding
ENSG00000182263.14	1.94612	3.37275	16.3404	0.0036295	FIGN	protein_coding
ENSG00000169507.9	1.43375	3.14661	10.1068	0.012809	SLC38A11	protein_coding
ENSG00000115339.13	1.29129	-0.407912	7.6939	0.0238454	GALNT3	protein_coding
ENSG00000236107.9	1.00992	-0.215782	6.31598	0.0353953	SCN1A-AS1	antisense
ENSG00000144285.19	1.48836	2.38727	8.33554	0.0200273	SCN1A	protein_coding
ENSG00000115840.14	1.57429	3.19612	49.7507	9.26141e-05	SLC25A12	protein_coding
ENSG00000144355.15	1.11066	2.33358	8.2137	0.0206936	DLX1	protein_coding
ENSG00000207744.1	-3.03389	-2.15776	7.47278	0.025408	MIR10B	miRNA
ENSG00000230552.5	-2.1511	-1.84488	5.53679	0.0460861	AC092162.2	lincRNA
ENSG00000213963.6	-1.15184	2.99303	17.877	0.00280468	AC019080.1	sense_overlapping
ENSG00000278418.1	-3.0439	-2.1548	9.00038	0.016605	MIR6512	miRNA
ENSG00000128655.18	2.7632	2.02797	81.045	1.53141e-05	PDE11A	protein_coding
ENSG00000144331.20	1.11616	-0.154778	8.42603	0.0192048	ZNF385B	protein_coding
ENSG00000170396.8	2.00475	1.08302	15.888	0.00392857	ZNF804A	protein_coding
ENSG00000237877.6	2.0372	-0.868098	12.0719	0.0082286	LINC01473	lincRNA
ENSG00000270757.1	-2.39738	-1.43029	6.06914	0.0387501	HSPE1-MOB4	protein_coding
ENSG00000237166.1	-1.84392	-1.20476	6.35102	0.0354633	LINC01792	lincRNA
ENSG00000230799.1	1.67131	-1.21795	7.64868	0.0240253	AC007279.1	processed_pseudogene
ENSG00000118257.16	-1.57558	7.68349	15.5744	0.00415413	NRP2	protein_coding
ENSG00000114948.13	-2.18045	3.09344	9.69199	0.0141584	ADAM23	protein_coding
ENSG00000228577.1	-2.45147	-1.672	9.5019	0.0147293	AC010731.2	antisense
ENSG00000115361.8	-3.02509	-1.67282	9.40937	0.0151811	ACADL	protein_coding
ENSG00000115457.10	1.06888	3.42808	24.2163	0.00106759	IGFBP2	protein_coding
ENSG00000284820.1	-1.08728	-0.47678	8.17388	0.0205603	AC068946.2	protein_coding
ENSG00000127824.14	1.49176	4.79715	23.5381	0.0012254	TUBA4A	protein_coding
ENSG00000124003.12	-3.27701	-2.03552	6.0479	0.0390131	MOGAT1	protein_coding
ENSG00000153823.18	-2.14916	1.3459	12.0281	0.00830569	PID1	protein_coding
ENSG00000163273.4	-1.66173	1.28678	18.1255	0.00269421	NPPC	protein_coding
ENSG00000163286.9	-3.28159	1.34255	20.7054	0.00181531	ALPG	protein_coding
ENSG00000115468.12	-1.8748	0.884786	11.8687	0.00859455	EFHD1	protein_coding
ENSG00000066248.15	1.65672	3.46087	32.4776	0.000434898	NGEF	protein_coding
ENSG00000222001.2	2.29365	0.171338	24.0122	0.00115152	AC106876.1	processed_transcript
ENSG00000243135.6	2.35696	0.159857	28.1971	0.000690969	UGT1A3	protein_coding
ENSG00000241635.7	2.10504	1.43979	21.3079	0.00166428	UGT1A1	protein_coding
ENSG00000144481.17	-2.04632	-0.697393	8.83303	0.0175715	TRPM8	protein_coding
ENSG00000234949.2	1.48422	1.22729	10.7582	0.0109996	AC104667.2	antisense
ENSG00000178752.16	-1.90507	-0.790818	8.58052	0.0187674	ERFE	protein_coding
ENSG00000186235.10	-1.3325	-0.12995	7.33988	0.0263923	LINC02610	processed_transcript
ENSG00000144485.11	-1.19356	6.74946	8.55854	0.0188763	HES6	protein_coding
ENSG00000218416.4	-1.23224	0.322706	6.01184	0.0394649	AC110619.1	processed_transcript
ENSG00000172478.18	-1.78266	0.293347	8.88677	0.0173294	MAB21L4	protein_coding
ENSG00000162804.14	-1.38676	1.89756	7.07748	0.0284813	SNED1	protein_coding
ENSG00000273113.1	-3.16344	-2.09241	8.28438	0.0203037	AC133528.1	lincRNA
ENSG00000125046.14	1.07087	6.37135	17.5146	0.00297606	SSUH2	protein_coding
ENSG00000196220.16	-1.47822	3.0276	8.90773	0.0172362	SRGAP3	protein_coding
ENSG00000187288.10	3.93791	1.91159	55.4141	6.85137e-05	CIDEC	protein_coding
ENSG00000134070.5	1.03853	4.07928	19.4203	0.00219916	IRAK2	protein_coding
ENSG00000157087.19	-1.86266	4.27044	9.0894	0.0164537	ATP2B2	protein_coding
ENSG00000264534.3	-3.01724	-2.15851	6.41184	0.0348009	MIR378B	miRNA
ENSG00000132170.21	2.21673	4.52632	7.8287	0.0229909	PPARG	protein_coding
ENSG00000283392.1	-3.13599	-2.10493	6.85547	0.0304143	AC090952.2	lincRNA
ENSG00000230524.8	-1.15577	0.0443197	7.15418	0.0278497	COL6A4P1	transcribed_unprocessed_pseudogene
ENSG00000272529.1	1.46895	-1.32174	5.75471	0.0425878	AC090948.3	antisense
ENSG00000154822.18	-1.65818	2.91851	10.6862	0.011183	PLCL2	protein_coding
ENSG00000274840.4	2.51566	-2.07501	5.48622	0.0468717	AC132807.2	lincRNA
ENSG00000151789.12	-1.48918	-0.763352	6.9821	0.0292921	ZNF385D	protein_coding
ENSG00000163508.12	-1.32301	2.10832	18.1101	0.00270093	EOMES	protein_coding
ENSG00000144677.15	1.15083	5.51612	20.4705	0.00187881	CTDSPL	protein_coding
ENSG00000187091.13	-1.21536	5.64232	6.49287	0.0339426	PLCD1	protein_coding
ENSG00000168356.11	-1.48775	-0.12023	12.4968	0.00739306	SCN11A	protein_coding
ENSG00000283849.1	-2.50895	-0.488337	35.3712	0.000306163	AC092053.2	antisense
ENSG00000280739.2	1.18933	-0.763406	5.38341	0.0484284	EIF1B-AS1	processed_transcript
ENSG00000180432.5	1.69885	0.545131	21.7197	0.00150272	CYP8B1	protein_coding
ENSG00000249992.1	-2.94674	0.299266	45.7424	0.000131	TMEM158	protein_coding
ENSG00000114646.10	-1.97366	-1.47952	8.96333	0.016671	CSPG5	protein_coding
ENSG00000185614.5	-1.58645	1.15953	6.73165	0.0315646	INKA1	protein_coding
ENSG00000179564.4	1.74234	-1.73311	6.32856	0.0352558	LSMEM2	protein_coding
ENSG00000007402.11	-1.80181	-0.39609	8.82707	0.0175986	CACNA2D2	protein_coding
ENSG00000010327.10	-1.25136	0.824218	8.4868	0.0192373	STAB1	protein_coding
ENSG00000162267.12	2.87457	7.46579	18.6658	0.00247225	ITIH3	protein_coding
ENSG00000271916.1	2.13514	-1.52636	12.7979	0.00687765	AC012467.1	antisense
ENSG00000168306.13	1.06068	4.37208	10.1066	0.0128097	ACOX2	protein_coding
ENSG00000189283.10	1.03493	1.15782	5.65749	0.0442778	FHIT	protein_coding
ENSG00000163637.13	-1.78616	0.755474	8.08463	0.0214301	PRICKLE2	protein_coding
ENSG00000270059.1	1.48001	-1.31775	6.01417	0.0390863	AC121493.1	sense_intronic
ENSG00000272610.1	1.24145	0.299807	12.6597	0.00707812	MAGI1-IT1	sense_intronic
ENSG00000243083.6	2.46523	-0.24847	11.9801	0.00839147	LINC00870	lincRNA
ENSG00000121440.15	-1.95148	-0.294194	13.5342	0.00609702	PDZRN3	protein_coding
ENSG00000242741.1	-1.54925	0.791232	8.9729	0.0169502	LINC02005	lincRNA
ENSG00000185008.17	-2.16118	-1.59037	7.41884	0.0258019	ROBO2	protein_coding
ENSG00000240241.5	-2.09417	1.25684	9.25066	0.0157962	AC108752.1	lincRNA
ENSG00000064225.12	1.36496	3.99052	22.3812	0.0014321	ST3GAL6	protein_coding
ENSG00000057019.16	1.13431	8.82054	25.5599	0.000898678	DCBLD2	protein_coding
ENSG00000206712.1	2.06228	0.22807	14.2687	0.0052876	RNU6-26P	snRNA
ENSG00000239462.1	2.52544	-1.77079	13.276	0.00623659	AC091212.1	antisense
ENSG00000240476.1	2.13245	2.97884	85.9649	1.22528e-05	LINC00973	lincRNA
ENSG00000168386.18	1.45123	6.82434	7.20344	0.0274534	FILIP1L	protein_coding
ENSG00000206535.8	2.46531	0.793342	25.417	0.000963015	LNP1	protein_coding
ENSG00000114391.13	1.22892	8.31614	6.95134	0.0295599	RPL24	protein_coding
ENSG00000244119.1	-1.70422	-0.820284	8.68415	0.0182646	PDCL3P4	processed_pseudogene
ENSG00000243701.6	-1.24988	1.02909	6.65261	0.0323277	DUBR	lincRNA
ENSG00000241634.1	-1.65914	-0.354008	5.35771	0.0489458	AC069499.1	processed_pseudogene
ENSG00000206532.2	1.4877	2.6571	38.0899	0.000237399	AC117402.1	lincRNA
ENSG00000242242.5	1.21915	0.786367	8.68896	0.0182417	NECTIN3-AS1	antisense
ENSG00000241889.1	-2.35332	-2.03965	7.34167	0.0259794	AC079944.2	processed_pseudogene
ENSG00000031081.10	-1.36814	0.0636842	6.76676	0.0312329	ARHGAP31	protein_coding
ENSG00000144852.17	1.17555	4.5525	39.4768	0.000209729	NR1I2	protein_coding
ENSG00000163430.12	-1.24517	-0.0617799	9.42147	0.0148999	FSTL1	protein_coding
ENSG00000121552.4	-1.69448	7.69912	13.1152	0.00662874	CSTA	protein_coding
ENSG00000273033.2	-1.04738	2.32394	12.3104	0.00782351	LINC02035	lincRNA
ENSG00000173175.14	-1.63411	-0.224302	8.50268	0.0191566	ADCY5	protein_coding
ENSG00000173702.7	1.38861	3.88214	5.81975	0.0419864	MUC13	protein_coding
ENSG00000221955.10	-1.03394	1.2316	5.95993	0.040127	SLC12A8	protein_coding
ENSG00000229048.5	-2.34166	-1.48638	7.5142	0.0251108	DUTP1	processed_pseudogene
ENSG00000144908.13	-1.21214	4.40645	7.68678	0.0239184	ALDH1L1	protein_coding
ENSG00000246022.2	-1.76078	0.0630348	19.1144	0.00221641	ALDH1L1-AS2	antisense
ENSG00000261159.1	-2.12092	-1.84066	6.24994	0.0365692	AC112484.3	lincRNA
ENSG00000231305.3	-1.19309	-0.844701	6.88161	0.0297538	AC112484.1	antisense
ENSG00000114654.7	1.27682	-0.529642	6.61618	0.0326873	EFCC1	protein_coding
ENSG00000181789.14	1.28277	6.96667	43.2961	0.000151817	COPG1	protein_coding
ENSG00000172771.12	2.09828	1.27716	34.2053	0.000365886	EFCAB12	protein_coding
ENSG00000163914.4	1.26582	-0.215409	6.74857	0.0314042	RHO	protein_coding
ENSG00000203644.3	1.06806	2.11857	11.0161	0.0103726	AC083799.1	sense_intronic
ENSG00000271270.6	1.13394	1.80384	6.29818	0.0360517	TMCC1-AS1	antisense
ENSG00000206384.10	-1.23389	-0.393361	9.36527	0.0150451	COL6A6	protein_coding
ENSG00000154917.11	-1.17953	1.16016	9.19413	0.0160229	RAB6B	protein_coding
ENSG00000174564.13	2.07148	-1.56108	8.49561	0.0190448	IL20RB	protein_coding
ENSG00000120756.13	1.19384	4.45596	7.95956	0.0221756	PLS1	protein_coding
ENSG00000114698.15	3.63768	3.81754	8.41453	0.0196098	PLSCR4	protein_coding
ENSG00000243885.1	1.2949	1.15497	6.89015	0.0301016	AC108751.4	lincRNA
ENSG00000018408.14	1.00688	6.82198	18.3654	0.00259272	WWTR1	protein_coding
ENSG00000206199.10	-2.12734	1.19577	23.363	0.00125418	ANKUB1	protein_coding
ENSG00000070087.14	1.01257	7.04074	20.0972	0.00198555	PFN2	protein_coding
ENSG00000244265.1	-1.1721	1.65792	19.9469	0.0019475	SIAH2-AS1	antisense
ENSG00000152601.17	1.08455	5.57853	12.2991	0.00784216	MBNL1	protein_coding
ENSG00000244268.1	-1.09518	0.819185	13.7861	0.00563294	AC117394.2	antisense
ENSG00000243629.1	1.26922	-0.64791	5.6782	0.0439767	LINC00880	lincRNA
ENSG00000163590.14	-1.60058	1.62622	19.1808	0.00228158	PPM1L	protein_coding
ENSG00000269984.1	-1.08505	-0.539007	5.99425	0.039212	AC078795.1	antisense
ENSG00000173890.17	1.3419	5.39362	8.20975	0.0207156	GPR160	protein_coding
ENSG00000199488.1	2.69793	-0.194966	18.4801	0.0025459	RNU1-70P	snRNA
ENSG00000163581.14	2.38231	4.22442	17.1941	0.0031387	SLC2A2	protein_coding
ENSG00000121858.11	1.72384	2.93058	18.7366	0.00244488	TNFSF10	protein_coding
ENSG00000058056.9	1.08958	5.59439	9.64243	0.0143313	USP13	protein_coding
ENSG00000090539.15	-1.26307	6.22494	15.9627	0.00387715	CHRD	protein_coding
ENSG00000163898.10	2.27034	3.02751	20.0047	0.00201316	LIPH	protein_coding
ENSG00000171658.8	1.90003	1.68758	26.8259	0.000811121	NMRAL2P	transcribed_unprocessed_pseudogene
ENSG00000058866.15	1.69822	3.27646	41.7863	0.000185128	DGKG	protein_coding
ENSG00000127241.16	1.3192	2.44524	9.55419	0.0146458	MASP1	protein_coding
ENSG00000136514.3	1.4231	-1.23064	5.77127	0.0423906	RTP4	protein_coding
ENSG00000145012.13	1.00603	7.32499	7.22294	0.0272985	LPP	protein_coding
ENSG00000276407.4	-2.50526	-1.38119	11.7598	0.00879902	AC024559.2	lincRNA
ENSG00000184203.8	1.19664	6.65402	8.18073	0.0208786	PPP1R2	protein_coding
ENSG00000189058.9	1.63998	-0.503858	10.2152	0.0124831	APOD	protein_coding
ENSG00000224769.1	-2.72371	-1.84507	10.0077	0.0129409	MUC20P1	unprocessed_pseudogene
ENSG00000176945.17	-1.67066	1.20052	18.4311	0.00256577	MUC20	protein_coding
ENSG00000260261.2	-1.16474	2.36609	14.2202	0.00533675	AC124944.3	transcribed_unprocessed_pseudogene
ENSG00000225822.4	-2.14973	-1.84149	5.93498	0.0404501	UBXN7-AS1	antisense
ENSG00000215375.6	-1.12564	2.79024	20.0651	0.00191295	MYL5	protein_coding
ENSG00000185818.7	-1.11013	4.09439	10.3366	0.0121308	NAT8L	protein_coding
ENSG00000247708.7	1.14958	1.37651	11.3979	0.00952433	STX18-AS1	antisense
ENSG00000173013.5	-1.02593	2.33383	8.56642	0.0188372	CCDC96	protein_coding
ENSG00000178597.7	-1.4562	-0.624426	6.53398	0.0335174	PSAPL1	protein_coding
ENSG00000247624.6	-2.2371	-0.982981	7.48257	0.0253374	CPEB2-DT	lincRNA
ENSG00000007062.11	1.11634	4.34392	24.8229	0.00102606	PROM1	protein_coding
ENSG00000145147.20	-1.73516	1.3052	32.0238	0.000428654	SLIT2	protein_coding
ENSG00000109819.9	2.41052	4.0653	16.2585	0.00368148	PPARGC1A	protein_coding
ENSG00000281501.1	1.34515	0.868484	9.50533	0.0148237	SEPSECS-AS1	antisense
ENSG00000109680.11	1.31649	0.282139	9.28074	0.0156773	TBC1D19	protein_coding
ENSG00000174145.8	-1.51476	-1.27685	6.38415	0.0346892	NWD2	protein_coding
ENSG00000174130.12	1.43829	0.501214	12.996	0.00679051	TLR6	protein_coding
ENSG00000154277.12	2.46257	0.598208	41.6892	0.000176407	UCHL1	protein_coding
ENSG00000249212.1	-2.33058	-2.0465	5.56987	0.0455813	ATP1B1P1	unprocessed_pseudogene
ENSG00000109182.12	-3.14618	-2.10185	8.93935	0.0170654	CWH43	protein_coding
ENSG00000188993.3	1.7513	-0.489088	10.8752	0.0107095	LRRC66	protein_coding
ENSG00000251040.1	-3.16703	-2.09133	7.19143	0.0275494	LINC02480	lincRNA
ENSG00000226887.8	-1.34793	1.22567	18.8813	0.00229675	ERVMER34-1	protein_coding
ENSG00000162840.4	1.60534	3.07555	37.125	0.000274524	MT2P1	processed_pseudogene
ENSG00000250919.1	-1.17419	-0.376007	9.70339	0.0138287	UGT2B26P	unprocessed_pseudogene
ENSG00000250696.5	-1.74445	0.312638	14.6316	0.00493732	AC111000.4	antisense
ENSG00000213759.9	-1.10333	1.72012	12.252	0.00786052	UGT2B11	protein_coding
ENSG00000156096.14	-2.08014	0.00803275	7.02201	0.0289494	UGT2B4	protein_coding
ENSG00000173597.9	1.91153	0.17126	19.2657	0.00225192	SULT1B1	protein_coding
ENSG00000109205.16	2.55644	3.06703	15.0815	0.00454252	ODAM	protein_coding
ENSG00000169435.14	-1.12314	0.0521298	9.2415	0.0155237	RASSF6	protein_coding
ENSG00000163738.18	1.26325	2.57165	7.88137	0.0226583	MTHFD2L	protein_coding
ENSG00000138769.11	-1.90824	-1.70889	7.07456	0.0280919	CDKL2	protein_coding
ENSG00000251442.5	2.32122	-1.63999	7.34983	0.026317	LINC01094	lincRNA
ENSG00000145284.12	-1.60956	0.807964	7.42827	0.0257324	SCD5	protein_coding
ENSG00000145287.10	1.90827	4.08836	5.71718	0.0434169	PLAC8	protein_coding
ENSG00000138678.11	1.00953	3.25675	5.57654	0.0454804	GPAT3	protein_coding
ENSG00000198189.11	1.59458	6.29067	11.1477	0.0100699	HSD17B11	protein_coding
ENSG00000118785.14	1.6887	7.89325	21.3053	0.00166489	SPP1	protein_coding
ENSG00000145335.15	-1.69244	-0.219452	7.81938	0.0230504	SNCA	protein_coding
ENSG00000274238.1	-2.64179	-0.127598	29.3702	0.000605362	AC097478.2	antisense
ENSG00000198099.8	1.44069	3.60005	7.59595	0.0245368	ADH4	protein_coding
ENSG00000138823.13	2.66757	5.32345	5.47787	0.047003	MTTP	protein_coding
ENSG00000164038.15	1.21399	4.71833	6.54473	0.0334074	SLC9B2	protein_coding
ENSG00000168743.12	-1.18292	6.01167	19.8928	0.0020472	NPNT	protein_coding
ENSG00000205403.13	1.27291	4.94132	22.4963	0.00140969	CFI	protein_coding
ENSG00000180245.5	-1.98313	-1.66448	5.68589	0.0438656	RRH	protein_coding
ENSG00000183423.11	-2.21265	-1.34342	13.3512	0.00614278	LRIT3	protein_coding
ENSG00000138798.12	4.76859	1.83	114.079	4.71553e-06	EGF	protein_coding
ENSG00000170522.9	-1.01827	3.77188	9.19767	0.0160086	ELOVL6	protein_coding
ENSG00000174749.6	1.29277	4.02468	27.6297	0.000737793	FAM241A	protein_coding
ENSG00000150961.15	1.00156	5.04603	27.6104	0.000700151	SEC24D	protein_coding
ENSG00000145384.3	2.12921	-0.932557	6.74859	0.031404	FABP2	protein_coding
ENSG00000164109.14	-1.66966	4.67524	47.6404	0.000117193	MAD2L1	protein_coding
ENSG00000085871.9	1.03005	6.73747	11.3638	0.0095965	MGST2	protein_coding
ENSG00000170153.11	-1.78488	0.588243	8.366	0.019865	RNF150	protein_coding
ENSG00000109452.12	-2.01041	-1.66895	5.41278	0.0480429	INPP4B	protein_coding
ENSG00000251600.7	1.79419	-1.91411	5.29051	0.049652	AC107223.1	processed_transcript
ENSG00000151611.15	1.27821	2.17107	6.62239	0.0326257	MMAA	protein_coding
ENSG00000120519.14	1.50186	3.1514	18.842	0.00240486	SLC10A7	protein_coding
ENSG00000170390.16	-1.89292	-1.51833	7.459	0.0252509	DCLK2	protein_coding
ENSG00000251611.1	2.77455	-1.95933	8.06205	0.0215623	FAM160A1-DT	lincRNA
ENSG00000164142.16	1.13372	2.49947	7.51159	0.0251293	FAM160A1	protein_coding
ENSG00000137462.7	-1.3536	-0.926159	5.78332	0.0424876	TLR2	protein_coding
ENSG00000171564.11	2.83413	7.43455	10.9721	0.0104763	FGB	protein_coding
ENSG00000171560.15	2.85602	8.82269	14.8446	0.00474527	FGA	protein_coding
ENSG00000171557.16	2.81228	8.20971	12.6641	0.00726778	FGG	protein_coding
ENSG00000168843.14	1.04945	0.758743	6.60532	0.0327955	FSTL5	protein_coding
ENSG00000154447.15	1.18721	4.64145	27.6185	0.000738756	SH3RF1	protein_coding
ENSG00000198948.12	-1.46032	2.72586	16.5277	0.00351401	MFAP3L	protein_coding
ENSG00000248774.1	-1.42221	-1.10071	5.66746	0.0441277	AC097534.1	antisense
ENSG00000249173.5	-3.24295	-2.04067	8.61163	0.0186147	LINC01093	lincRNA
ENSG00000205129.8	-1.58333	0.640027	13.5601	0.00606598	C4orf47	protein_coding
ENSG00000154556.18	1.04255	3.96107	7.95404	0.0222092	SORBS2	protein_coding
ENSG00000109794.13	-1.47536	-0.602595	5.82213	0.041954	FAM149A	protein_coding
ENSG00000250829.2	2.50643	3.44319	39.6017	0.000222709	AC108865.1	lincRNA
ENSG00000272218.1	2.58494	1.68376	33.8774	0.000377872	AC108865.2	lincRNA
ENSG00000249378.5	1.43009	0.0894815	6.61832	0.032666	LINC01060	lincRNA
ENSG00000066230.11	-1.45549	0.0480368	8.24124	0.0205406	SLC9A3	protein_coding
ENSG00000225138.7	-1.38423	1.60672	17.7221	0.00287346	SLC9A3-AS1	processed_transcript
ENSG00000206077.11	-1.52946	-1.54946	6.18821	0.0368522	ZDHHC11B	protein_coding
ENSG00000272347.1	-2.40317	-1.04218	7.06279	0.0286043	AC116351.2	lincRNA
ENSG00000174358.16	3.69824	-1.91659	9.4756	0.0149333	SLC6A19	protein_coding
ENSG00000145545.12	-1.07386	4.54073	27.3109	0.000725466	SRD5A1	protein_coding
ENSG00000215217.7	-2.07028	0.808578	32.4168	0.000418253	C5orf49	protein_coding
ENSG00000145491.12	-1.72964	0.191217	12.6767	0.00724886	ROPN1L	protein_coding
ENSG00000145569.6	-1.04414	3.83657	14.9351	0.00466648	OTULINL	protein_coding
ENSG00000040731.10	-2.1516	-0.516431	17.8708	0.00278856	CDH10	protein_coding
ENSG00000145604.15	1.16725	3.55078	12.6432	0.00729922	SKP2	protein_coding
ENSG00000248461.2	1.37272	2.69988	9.68503	0.0141825	LINC02119	lincRNA
ENSG00000251257.2	-1.408	0.0254263	10.8727	0.010713	AC010457.1	antisense
ENSG00000132357.14	1.2753	-0.0992665	5.63551	0.0446003	CARD6	protein_coding
ENSG00000083720.13	1.14609	1.35399	6.46273	0.0342587	OXCT1	protein_coding
ENSG00000198865.10	1.42394	1.91029	19.844	0.00206228	CCDC152	protein_coding
ENSG00000250722.6	1.59147	8.47291	13.875	0.00570353	SELENOP	protein_coding
ENSG00000272382.1	-3.05077	-2.15277	8.87465	0.017176	AC025171.5	lincRNA
ENSG00000251141.5	1.42465	-0.866321	9.45501	0.0147096	MRPS30-DT	antisense
ENSG00000164171.11	1.50292	7.66202	10.7791	0.0109469	ITGA2	protein_coding
ENSG00000164509.14	-2.4159	-1.6765	6.59296	0.0329191	IL31RA	protein_coding
ENSG00000113448.19	1.61798	3.99434	6.09436	0.0384407	PDE4D	protein_coding
ENSG00000152931.7	1.1056	2.63257	8.32319	0.0200936	PART1	lincRNA
ENSG00000268942.2	-1.52438	-0.822247	9.04005	0.0163662	CKS1BP3	processed_pseudogene
ENSG00000186479.4	-2.54991	-1.94039	6.47669	0.0341118	RGS7BP	protein_coding
ENSG00000049192.15	1.52442	4.37074	9.31793	0.0155317	ADAMTS6	protein_coding
ENSG00000269961.1	-1.9044	-1.33785	7.94839	0.0222273	AC010359.1	lincRNA
ENSG00000250387.2	-2.45193	-1.98546	7.6705	0.0237737	LINC02197	lincRNA
ENSG00000271926.1	-1.33234	0.508077	7.36782	0.0261815	AC008972.1	lincRNA
ENSG00000272081.1	-1.42565	1.70401	19.698	0.00209143	AC008972.2	lincRNA
ENSG00000251467.1	-2.2414	-2.09846	5.87254	0.0410268	AC020893.2	processed_pseudogene
ENSG00000251493.5	-1.25995	-0.520387	6.37882	0.0351585	FOXD1	protein_coding
ENSG00000214944.9	1.21373	5.755	40.0517	0.00019944	ARHGEF28	protein_coding
ENSG00000207336.1	2.54423	-2.06994	5.57525	0.0454999	RNU6-658P	snRNA
ENSG00000132837.14	1.93106	2.44999	49.9286	9.14351e-05	DMGDH	protein_coding
ENSG00000132840.10	1.06075	4.35472	13.8718	0.005707	BHMT2	protein_coding
ENSG00000145692.15	1.7303	1.50605	15.405	0.00428279	BHMT	protein_coding
ENSG00000249042.5	1.10279	0.287802	8.01802	0.021698	AC008771.1	antisense
ENSG00000248323.6	1.33833	3.15594	8.16304	0.0209788	LUCAT1	antisense
ENSG00000249958.1	1.86522	-0.579343	14.5009	0.00499755	CCT7P2	processed_pseudogene
ENSG00000237187.8	1.13401	2.47353	7.82351	0.0230241	NR2F1-AS1	antisense
ENSG00000251348.1	1.62103	-1.02226	10.6272	0.0110799	HSPD1P11	processed_pseudogene
ENSG00000236882.7	-1.68926	-0.0621987	7.59043	0.0245751	LINC01554	lincRNA
ENSG00000133835.15	1.1487	6.75206	11.9321	0.00847821	HSD17B4	protein_coding
ENSG00000250328.5	3.63765	-1.96431	12.7595	0.00712631	AC022101.1	antisense
ENSG00000155324.9	1.1282	3.24656	13.2713	0.00642413	GRAMD2B	protein_coding
ENSG00000138829.12	-1.88847	5.23937	9.6792	0.0142027	FBN2	protein_coding
ENSG00000164398.13	-1.10624	1.86391	7.10537	0.0282496	ACSL6	protein_coding
ENSG00000145826.9	-1.36939	2.48271	28.3683	0.000640818	LECT2	protein_coding
ENSG00000164616.16	-1.00925	5.70204	27.7157	0.000691507	FBXL21P	transcribed_unitary_pseudogene
ENSG00000271824.1	-1.38918	-0.182468	12.9414	0.0066769	SMIM32	protein_coding
ENSG00000113108.19	-1.04189	0.4229	7.98655	0.0217477	APBB3	protein_coding
ENSG00000272070.1	1.58827	0.00213643	13.5123	0.00612348	AC005618.1	lincRNA
ENSG00000204956.5	1.97986	-0.504701	13.7365	0.00585952	PCDHGA1	protein_coding
ENSG00000253910.2	1.06372	1.03235	5.67123	0.0440778	PCDHGB2	protein_coding
ENSG00000156463.18	1.04011	2.66571	11.0502	0.010293	SH3RF2	protein_coding
ENSG00000156475.18	-1.96603	-1.13924	7.62506	0.0243364	PPP2R2B	protein_coding
ENSG00000164266.10	5.90977	3.99526	158.35	1.33806e-06	SPINK1	protein_coding
ENSG00000169252.5	-2.43583	0.269809	11.5026	0.00930714	ADRB2	protein_coding
ENSG00000157510.14	-1.24904	0.0329288	10.503	0.0114069	AFAP1L1	protein_coding
ENSG00000145882.11	-1.92344	2.86701	22.2086	0.00146657	PCYOX1L	protein_coding
ENSG00000127743.6	-1.79385	0.227908	19.838	0.00201469	IL17B	protein_coding
ENSG00000113721.14	1.37595	1.72985	16.5595	0.00349487	PDGFRB	protein_coding
ENSG00000211445.12	1.50522	7.51356	31.1164	0.000501024	GPX3	protein_coding
ENSG00000196743.8	-1.15697	8.84478	6.71588	0.031715	GM2A	protein_coding
ENSG00000113140.11	-1.0971	4.47193	24.2736	0.00110328	SPARC	protein_coding
ENSG00000253921.1	-1.83832	-1.5535	5.3366	0.0492976	AC091982.1	antisense
ENSG00000113196.3	-2.00228	-0.43758	12.3943	0.00768698	HAND1	protein_coding
ENSG00000113249.12	1.19569	1.26059	15.307	0.00421838	HAVCR1	protein_coding
ENSG00000221886.4	1.02892	1.83875	9.22658	0.0158923	ZBED8	protein_coding
ENSG00000253522.6	2.72969	2.9663	12.8693	0.00696794	MIR3142HG	lincRNA
ENSG00000254186.2	-1.42583	-0.219605	11.458	0.0091772	AC113414.1	antisense
ENSG00000156427.8	-2.64591	-1.55229	13.6781	0.00575436	FGF18	protein_coding
ENSG00000113734.17	1.11407	2.63393	9.93678	0.0133416	BNIP1	protein_coding
ENSG00000253686.1	1.03116	3.5986	21.6126	0.00152404	LINC01484	lincRNA
ENSG00000254211.5	2.03358	-0.759131	7.84985	0.0228566	LINC01485	lincRNA
ENSG00000145920.15	1.17987	6.38891	34.4848	0.000334591	CPLX2	protein_coding
ENSG00000074276.10	1.23429	4.99443	6.00658	0.0395313	CDHR2	protein_coding
ENSG00000113763.12	-2.85645	-0.397605	14.7639	0.00481693	UNC5A	protein_coding
ENSG00000252464.1	1.59216	-1.03085	5.33252	0.049366	RN7SKP70	misc_RNA
ENSG00000204661.9	-1.66936	-0.330482	7.03854	0.0288089	C5orf60	protein_coding
ENSG00000131459.13	-1.64707	-0.585972	8.80881	0.017682	GFPT2	protein_coding
ENSG00000161055.4	-1.3558	0.654901	6.65232	0.0323305	SCGB3A1	protein_coding
ENSG00000165810.17	-1.87823	-0.931947	9.40481	0.0151983	BTNL9	protein_coding
ENSG00000137273.5	-1.30714	0.354934	8.79833	0.01773	FOXF2	protein_coding
ENSG00000145949.10	-1.05639	-0.390836	5.51465	0.0462297	MYLK4	protein_coding
ENSG00000244041.7	1.79935	0.946934	11.6518	0.00900804	LINC01011	lincRNA
ENSG00000260604.2	1.48681	5.00858	31.3648	0.000488064	AL590004.3	lincRNA
ENSG00000231811.2	-3.14666	-2.0975	9.92629	0.0131731	AL159166.1	lincRNA
ENSG00000124787.13	1.2997	3.97433	9.19434	0.016022	RPP40	protein_coding
ENSG00000233503.1	-3.03533	-2.15321	6.49036	0.0339689	HNRNPLP1	processed_pseudogene
ENSG00000153162.9	1.49551	1.02925	15.1741	0.00446615	BMP6	protein_coding
ENSG00000111846.17	2.2349	4.13144	75.9379	2.17429e-05	GCNT2	protein_coding
ENSG00000285763.1	-1.39048	-0.241813	8.93427	0.017119	AL358777.1	antisense
ENSG00000078401.7	3.5245	5.18631	57.9612	5.82993e-05	EDN1	protein_coding
ENSG00000145990.11	-1.15683	3.41435	6.12328	0.0380897	GFOD1	protein_coding
ENSG00000235488.1	-2.03373	-1.11298	8.06257	0.0215593	JARID2-AS1	antisense
ENSG00000112183.15	1.58189	4.3945	23.2753	0.0012689	RBM24	protein_coding
ENSG00000112186.12	1.27123	5.70956	21.0411	0.00172915	CAP2	protein_coding
ENSG00000137261.14	2.59543	-0.350592	16.4619	0.00355403	KIAA0319	protein_coding
ENSG00000079689.14	1.41481	2.68617	7.78094	0.0232979	SCGN	protein_coding
ENSG00000124568.10	1.70047	-1.08198	5.9395	0.0403914	SLC17A1	protein_coding
ENSG00000124564.17	3.54441	-1.12865	19.8908	0.00204782	SLC17A3	protein_coding
ENSG00000272462.2	1.15568	1.33314	14.1763	0.00521965	U91328.1	lincRNA
ENSG00000010704.18	1.57196	2.71257	34.2967	0.000350616	HFE	protein_coding
ENSG00000180596.7	1.32449	3.73362	14.7498	0.00482955	HIST1H2BC	protein_coding
ENSG00000180573.9	1.03519	5.7325	7.93329	0.0223363	HIST1H2AC	protein_coding
ENSG00000186470.14	1.26185	3.773	25.3377	0.000972584	BTN3A2	protein_coding
ENSG00000026950.17	1.43394	2.88017	17.0332	0.00322457	BTN3A1	protein_coding
ENSG00000111801.16	1.13727	2.50411	10.7254	0.0110827	BTN3A3	protein_coding
ENSG00000196787.3	-1.16816	4.26133	17.3391	0.00306379	HIST1H2AG	protein_coding
ENSG00000124657.1	-1.37647	-0.386971	5.76195	0.0427851	OR2B6	protein_coding
ENSG00000204681.11	-1.70849	0.206119	5.48996	0.0468129	GABBR1	protein_coding
ENSG00000229390.1	1.70335	-1.30476	6.2267	0.0368675	MICD	unprocessed_pseudogene
ENSG00000204618.8	-1.04808	2.89283	7.32666	0.0264929	RNF39	protein_coding
ENSG00000204616.11	2.13485	-0.0791081	15.0849	0.00453964	TRIM31	protein_coding
ENSG00000204613.11	1.03716	2.8803	14.6158	0.00495195	TRIM10	protein_coding
ENSG00000204610.13	1.40117	4.86076	40.5806	0.000204297	TRIM15	protein_coding
ENSG00000272501.1	1.22399	1.8825	11.3691	0.00958525	AL662844.4	antisense
ENSG00000204516.10	-1.30012	5.82874	41.0083	0.000187907	MICB	protein_coding
ENSG00000204444.11	1.77498	7.12752	9.01208	0.0167812	APOM	protein_coding
ENSG00000166278.15	1.08789	5.38101	8.98812	0.0168843	C2	protein_coding
ENSG00000243649.8	1.84349	4.10458	20.0835	0.00198962	CFB	protein_coding
ENSG00000204338.8	1.41205	0.432224	13.0168	0.00674597	CYP21A1P	transcribed_unprocessed_pseudogene
ENSG00000196126.11	-1.57536	-1.38105	6.0998	0.0380676	HLA-DRB1	protein_coding
ENSG00000225339.3	-1.69069	-0.645721	8.59792	0.0186818	AL354740.1	processed_transcript
ENSG00000112053.13	1.08135	-0.263466	7.15896	0.0274017	SLC26A8	protein_coding
ENSG00000010030.14	-1.35816	1.67703	8.12094	0.0212196	ETV7	protein_coding
ENSG00000179165.11	-1.6265	0.27488	18.8849	0.00229543	PXT1	protein_coding
ENSG00000112078.14	1.13067	6.2048	36.7348	0.000268961	KCTD20	protein_coding
ENSG00000285888.1	1.90716	-1.6473	6.1232	0.0380907	Z85996.2	lincRNA
ENSG00000164530.15	-1.7615	-0.00300636	15.166	0.00447278	PI16	protein_coding
ENSG00000137193.14	2.48465	4.57373	94.327	9.68349e-06	PIM1	protein_coding
ENSG00000112139.16	-1.67406	0.513043	10.1887	0.012562	MDGA1	protein_coding
ENSG00000164627.18	-1.72413	-0.900787	5.50372	0.0465979	KIF6	protein_coding
ENSG00000112559.14	-1.85607	4.98683	8.54037	0.018967	MDFI	protein_coding
ENSG00000124593.16	-1.19076	2.63583	12.9373	0.00687199	AL365205.1	protein_coding
ENSG00000112599.9	-1.46259	-0.533104	8.86976	0.0173807	GUCA1B	protein_coding
ENSG00000181524.6	1.36026	5.2177	8.96767	0.016973	RPL24P4	processed_pseudogene
ENSG00000137204.14	1.98038	-0.148404	7.23675	0.0271895	SLC22A7	protein_coding
ENSG00000146215.13	1.31743	-0.629484	6.33683	0.0356201	CRIP3	protein_coding
ENSG00000204052.4	-1.67912	1.59255	8.93822	0.0171017	LRRC73	protein_coding
ENSG00000178233.17	-2.03249	-1.28087	7.36915	0.0261714	TMEM151B	protein_coding
ENSG00000272442.2	-1.84855	-1.0804	9.13912	0.0162474	AL353588.1	protein_coding
ENSG00000112782.17	-2.25584	-1.13013	16.2049	0.00358927	CLIC5	protein_coding
ENSG00000172348.14	-2.60037	-1.32713	5.50148	0.0466328	RCAN2	protein_coding
ENSG00000112818.10	2.20272	2.70674	18.6604	0.00247438	MEP1A	protein_coding
ENSG00000244067.3	-2.25739	1.57312	31.9733	0.000458046	GSTA2	protein_coding
ENSG00000243955.6	-1.35378	1.85129	13.304	0.00638231	GSTA1	protein_coding
ENSG00000236740.6	2.75277	-1.97109	7.41631	0.0258205	AL033384.1	lincRNA
ENSG00000236345.1	-1.08964	1.47665	9.44196	0.0150585	SCAT8	antisense
ENSG00000119900.9	-1.2938	3.21255	28.4823	0.000638618	OGFRL1	protein_coding
ENSG00000119899.13	1.15932	4.52116	20.4155	0.00189408	SLC17A5	protein_coding
ENSG00000156535.15	1.17769	6.55746	23.9854	0.00115555	CD109	protein_coding
ENSG00000112706.12	-1.18166	-0.289948	7.78863	0.0228736	IMPG1	protein_coding
ENSG00000118402.6	-1.43591	0.14217	14.2688	0.00512731	ELOVL4	protein_coding
ENSG00000234155.1	1.74572	1.26001	9.17467	0.0161019	LINC02535	lincRNA
ENSG00000154548.9	-1.34377	1.95644	12.8536	0.00699023	SRSF12	protein_coding
ENSG00000146267.12	-1.76413	-0.190451	6.77883	0.0311198	FAXC	protein_coding
ENSG00000112246.9	-2.55046	-1.94024	6.47002	0.034182	SIM1	protein_coding
ENSG00000203809.6	-1.15342	-0.5646	5.6595	0.0441562	LIN28B-AS1	lincRNA
ENSG00000187772.8	1.17637	4.53615	9.78187	0.0138513	LIN28B	protein_coding
ENSG00000112297.15	1.11073	5.87155	31.896	0.000434438	CRYBG1	protein_coding
ENSG00000235142.9	2.78673	3.02022	11.3156	0.0096996	LINC02532	processed_transcript
ENSG00000112333.11	-3.03896	-2.1562	5.98532	0.0398014	NR2E1	protein_coding
ENSG00000249853.7	1.57674	1.88479	7.58444	0.0246166	HS3ST5	protein_coding
ENSG00000047936.10	-1.34817	-0.537839	7.95192	0.0220959	ROS1	protein_coding
ENSG00000172594.13	2.03978	4.41422	17.2703	0.00309908	SMPDL3A	protein_coding
ENSG00000111907.21	-1.34024	-0.681087	6.36658	0.0352923	TPD52L1	protein_coding
ENSG00000111912.20	1.31944	3.20666	14.1574	0.00540125	NCOA7	protein_coding
ENSG00000286215.1	-1.09013	-0.549624	6.22936	0.0363749	AL356534.1	transcribed_processed_pseudogene
ENSG00000256162.2	1.41072	5.72001	23.1524	0.00128991	SMLR1	protein_coding
ENSG00000197594.13	1.22293	6.71348	8.96446	0.0169869	ENPP1	protein_coding
ENSG00000118523.6	1.83631	7.49698	52.2985	8.42418e-05	CCN2	protein_coding
ENSG00000112299.8	3.10652	3.76284	80.7529	1.73117e-05	VNN1	protein_coding
ENSG00000231023.6	2.49924	-0.541268	19.1207	0.00230287	LINC00326	lincRNA
ENSG00000118515.11	1.47809	5.1016	23.1172	0.001296	SGK1	protein_coding
ENSG00000118514.14	1.17416	1.70583	13.3805	0.00627764	ALDH8A1	protein_coding
ENSG00000231028.8	1.84905	-0.691323	13.4915	0.00607005	LINC00271	lincRNA
ENSG00000135525.18	-1.04238	0.439147	7.15437	0.0278422	MAP7	protein_coding
ENSG00000118503.15	1.39286	5.68041	33.4845	0.000392883	TNFAIP3	protein_coding
ENSG00000112379.9	1.27279	5.18525	34.4165	0.00035842	ARFGEF3	protein_coding
ENSG00000178199.13	1.08386	2.12649	8.76171	0.0178993	ZC3H12D	protein_coding
ENSG00000278899.1	-1.40692	-0.492592	8.15009	0.0210525	AL358852.1	antisense
ENSG00000111981.5	-2.12174	0.290193	8.34577	0.0199726	ULBP1	protein_coding
ENSG00000218358.2	-1.79912	-0.15097	17.6946	0.00280812	RAET1K	transcribed_unprocessed_pseudogene
ENSG00000074706.13	-2.77911	-1.48303	12.8484	0.0069959	IPCEF1	protein_coding
ENSG00000146453.13	-2.71978	-0.504909	12.5291	0.00747377	PNLDC1	protein_coding
ENSG00000272841.1	-1.59073	1.92791	37.4853	0.000250877	AL139393.2	antisense
ENSG00000112530.11	-5.19704	-2.09517	16.6927	0.00605002	PACRG	protein_coding
ENSG00000112541.14	-1.48105	-0.522986	6.21448	0.0370093	PDE10A	protein_coding
ENSG00000112486.16	2.14409	-0.801838	6.01479	0.0394277	CCR6	protein_coding
ENSG00000272549.1	1.7881	-1.14749	6.42991	0.0346071	LINC02538	lincRNA
ENSG00000203688.5	2.27427	-1.11385	7.98544	0.0220187	LINC02487	lincRNA
ENSG00000198221.8	1.3525	1.45669	15.4904	0.0042173	AFDN-DT	lincRNA
ENSG00000164488.12	1.32875	1.634	7.59041	0.0245752	DACT2	protein_coding
ENSG00000224417.2	1.00181	3.78675	15.0013	0.00460988	AL606970.1	sense_intronic
ENSG00000198719.9	-2.23325	0.605787	23.9855	0.00115554	DLL1	protein_coding
ENSG00000164850.15	1.21598	2.97606	16.6882	0.00341871	GPER1	protein_coding
ENSG00000002822.15	-1.09338	0.0174219	6.60791	0.0327696	MAD1L1	protein_coding
ENSG00000106003.13	-1.13161	3.50028	11.2961	0.00974166	LFNG	protein_coding
ENSG00000231704.5	-1.55811	-1.24481	6.2001	0.0370487	AC004895.1	lincRNA
ENSG00000228010.5	-1.02715	0.119507	5.50784	0.0465337	AC073343.2	antisense
ENSG00000226943.3	-2.0462	-1.89606	5.72544	0.0432329	ALG1L5P	unprocessed_pseudogene
ENSG00000244167.1	2.13909	-1.73673	7.21043	0.0273978	AC005532.2	processed_pseudogene
ENSG00000106541.12	1.26287	2.95911	13.17	0.00655593	AGR2	protein_coding
ENSG00000164651.16	-1.83231	-0.854997	6.63221	0.0325284	SP8	protein_coding
ENSG00000164649.20	1.60681	2.81992	8.0027	0.0219148	CDCA7L	protein_coding
ENSG00000136235.16	2.16363	2.17154	14.9508	0.00465297	GPNMB	protein_coding
ENSG00000197576.13	-1.40582	1.26697	16.0179	0.00383964	HOXA4	protein_coding
ENSG00000106006.6	1.06144	-0.846655	5.7698	0.0421864	HOXA6	protein_coding
ENSG00000146592.17	-1.21522	2.23076	20.3489	0.00183312	CREB5	protein_coding
ENSG00000106066.15	1.14864	6.58189	27.111	0.000784106	CPVL	protein_coding
ENSG00000285162.1	1.88546	-1.86305	5.63656	0.0443862	AC004593.3	protein_coding
ENSG00000227014.6	1.02506	-0.400244	7.538	0.0245529	AC007285.1	antisense
ENSG00000229358.3	1.10666	1.43993	11.991	0.00825449	DPY19L1P1	unprocessed_pseudogene
ENSG00000271117.1	-5.20685	-2.09209	12.6516	0.0116469	AC078841.1	processed_pseudogene
ENSG00000106483.12	-1.14815	3.88916	20.3465	0.00191345	SFRP4	protein_coding
ENSG00000106536.19	-2.36876	-1.71402	5.34824	0.0491032	POU6F2	protein_coding
ENSG00000002746.15	-1.62499	-0.977651	8.22774	0.0205138	HECW1	protein_coding
ENSG00000235314.1	1.75447	-1.41751	6.20455	0.037125	LINC00957	lincRNA
ENSG00000164742.16	-1.46669	4.12947	17.3857	0.0030402	ADCY1	protein_coding
ENSG00000146678.10	2.1257	10.4944	10.9857	0.0104441	IGFBP1	protein_coding
ENSG00000132437.18	1.84735	2.21262	8.1313	0.02116	DDC	protein_coding
ENSG00000224057.1	2.09193	2.2771	10.2558	0.012364	EGFR-AS1	antisense
ENSG00000228653.2	2.05142	-1.77716	6.17652	0.0374543	HNRNPCP7	processed_pseudogene
ENSG00000152926.14	1.05147	5.03639	12.3608	0.00774115	ZNF117	protein_coding
ENSG00000213462.5	1.12978	5.59993	32.36	0.00041388	ERV3-1	protein_coding
ENSG00000226767.1	3.36854	-0.703153	38.6301	0.000226112	AC114501.1	processed_pseudogene
ENSG00000275833.1	-1.19173	-0.412995	8.16837	0.0205912	AC073107.2	unprocessed_pseudogene
ENSG00000188763.4	-1.30766	1.20017	8.2131	0.0206969	FZD9	protein_coding
ENSG00000176428.6	-1.07403	3.25454	9.32437	0.0155067	VPS37D	protein_coding
ENSG00000158517.13	-1.54293	-0.354762	7.43735	0.0256658	NCF1	protein_coding
ENSG00000230882.1	1.60394	4.71496	33.2384	0.000402665	AC005077.4	processed_pseudogene
ENSG00000251798.1	3.32479	-1.63594	15.9526	0.00384011	RNU6-863P	snRNA
ENSG00000227038.3	1.52267	3.14045	31.8964	0.000461712	GTF2IP7	transcribed_unprocessed_pseudogene
ENSG00000188372.15	-1.45913	-1.31121	6.01939	0.0388955	ZP3	protein_coding
ENSG00000186704.9	-3.04727	-2.14961	6.16506	0.0375898	DTX2P1	transcribed_unprocessed_pseudogene
ENSG00000234456.7	1.30736	4.92252	13.7364	0.00585956	MAGI2-AS3	processed_transcript
ENSG00000135218.19	1.21181	3.4275	11.3087	0.00971452	CD36	protein_coding
ENSG00000186472.20	-1.51974	1.57875	28.8754	0.000604588	PCLO	protein_coding
ENSG00000075213.11	2.53131	3.59755	6.70404	0.0318285	SEMA3A	protein_coding
ENSG00000005471.17	1.72736	3.68922	17.4002	0.00303292	ABCB4	protein_coding
ENSG00000085563.14	1.42326	6.0841	10.995	0.010422	ABCB1	protein_coding
ENSG00000058091.17	-1.3651	-0.392803	6.17307	0.037495	CDK14	protein_coding
ENSG00000157240.3	-1.36633	2.04814	10.9075	0.010631	FZD1	protein_coding
ENSG00000177409.12	1.51935	-1.28173	6.33533	0.0353389	SAMD9L	protein_coding
ENSG00000242265.5	1.28284	9.73459	19.3024	0.00223925	PEG10	protein_coding
ENSG00000005981.13	2.29077	3.64425	45.073	0.00014231	ASB4	protein_coding
ENSG00000279525.1	3.63414	-1.44562	16.7479	0.00338411	AC002451.2	TEC
ENSG00000158560.14	1.70354	-0.53671	9.33218	0.0154764	DYNC1I1	protein_coding
ENSG00000284707.1	-1.69669	-0.934254	5.71039	0.0435138	AC079781.5	processed_transcript
ENSG00000185467.7	1.30997	-0.773134	9.80246	0.0134958	KPNA7	protein_coding
ENSG00000021461.16	-1.32507	2.48824	6.51606	0.0337019	CYP3A43	protein_coding
ENSG00000106351.13	1.70037	5.96086	60.612	4.9608e-05	AGFG2	protein_coding
ENSG00000087077.14	-1.19231	0.365242	5.5009	0.0466419	TRIP6	protein_coding
ENSG00000087085.15	-1.21525	5.87591	7.96947	0.0221154	ACHE	protein_coding
ENSG00000169894.18	-1.61441	-0.0496963	7.35815	0.0262542	MUC3A	protein_coding
ENSG00000128564.7	-1.22555	0.440072	13.0867	0.00648112	VGF	protein_coding
ENSG00000160963.14	-2.44177	-0.436715	11.123	0.0101259	COL26A1	protein_coding
ENSG00000244490.1	1.49318	-1.09951	6.00297	0.039577	RWDD4P1	processed_pseudogene
ENSG00000253276.3	-1.88994	1.02524	15.084	0.00454044	CCDC71L	protein_coding
ENSG00000272072.1	1.53024	-0.628083	6.56874	0.0331632	AC004492.1	antisense
ENSG00000091128.13	1.56145	0.401242	14.8233	0.00476402	LAMB4	protein_coding
ENSG00000135272.10	-2.47483	-0.664862	20.3193	0.00191157	MDFIC	protein_coding
ENSG00000105971.15	-1.31802	1.99844	16.6004	0.00347047	CAV2	protein_coding
ENSG00000105976.15	1.27535	6.52636	7.9271	0.0223744	MET	protein_coding
ENSG00000184408.10	-2.38469	-1.71251	7.30549	0.0266549	KCND2	protein_coding
ENSG00000196937.11	1.40128	4.59019	7.5994	0.024513	FAM3C	protein_coding
ENSG00000179603.17	-1.34541	-0.766748	5.31192	0.0497131	GRM8	protein_coding
ENSG00000224940.8	-3.09303	-1.63639	15.1044	0.00437886	PRRT4	protein_coding
ENSG00000280828.1	-1.18028	0.40614	7.37057	0.0261608	AC090114.3	unprocessed_pseudogene
ENSG00000272899.4	-1.93402	3.04833	21.243	0.00167977	ATP6V1FNB	protein_coding
ENSG00000242078.1	-3.36533	-1.99051	10.7359	0.0110491	AC084864.1	lincRNA
ENSG00000158516.12	-2.62777	-1.89108	9.33629	0.0152359	CPA2	protein_coding
ENSG00000122787.15	1.60001	3.26571	7.89989	0.0225428	AKR1D1	protein_coding
ENSG00000254270.1	-3.24749	-2.04897	9.23616	0.015854	ERHP1	processed_pseudogene
ENSG00000106123.12	-2.70782	0.189626	26.6964	0.000823762	EPHB6	protein_coding
ENSG00000178826.11	1.5076	2.03294	12.665	0.00726635	TMEM139	protein_coding
ENSG00000213215.5	1.89988	-0.19661	9.8081	0.0137633	OR2F1	protein_coding
ENSG00000199370.2	2.44128	-1.35945	8.76146	0.0179005	RF00012	snoRNA
ENSG00000204947.9	-1.24833	2.90488	17.2234	0.00312338	ZNF425	protein_coding
ENSG00000181444.13	-1.76961	0.35352	7.59958	0.0245117	ZNF467	protein_coding
ENSG00000261305.2	-1.46684	-1.44311	5.45803	0.0468093	AC005586.2	sense_overlapping
ENSG00000244151.1	-1.44608	-1.31186	6.86241	0.0299258	AC010973.2	antisense
ENSG00000164900.4	-2.41284	-1.23068	6.22968	0.036833	GBX1	protein_coding
ENSG00000204876.4	1.65678	3.97737	24.7537	0.00104681	AC021218.1	lincRNA
ENSG00000130675.15	-1.1516	2.52136	22.3636	0.00137091	MNX1	protein_coding
ENSG00000155093.19	2.84774	3.26555	63.1211	4.28224e-05	PTPRN2	protein_coding
ENSG00000279852.1	-1.08737	0.0316048	7.35297	0.0260326	AC083964.2	TEC
ENSG00000282021.1	2.63271	0.352031	21.6774	0.00157937	AC100810.3	lincRNA
ENSG00000164821.4	-3.23031	-1.55857	8.4846	0.0192485	DEFA4	protein_coding
ENSG00000223629.1	-3.34756	-1.99622	11.1253	0.0100381	DEFA8P	unprocessed_pseudogene
ENSG00000233238.1	-2.46223	-1.98746	5.56632	0.0456351	DEFA9P	unprocessed_pseudogene
ENSG00000233531.1	-2.8734	-1.14748	8.83142	0.0175788	DEFA10P	unprocessed_pseudogene
ENSG00000233609.3	-1.91251	-1.51489	7.34532	0.0261948	RPL10P19	transcribed_processed_pseudogene
ENSG00000173281.5	1.7311	-0.062882	19.2436	0.00216986	PPP1R3B	protein_coding
ENSG00000171044.10	-1.6664	-1.31416	7.14579	0.0276374	XKR6	protein_coding
ENSG00000154319.16	-2.26365	-1.52902	5.41426	0.048019	FAM167A	protein_coding
ENSG00000104723.20	3.0993	0.521642	51.3889	8.96641e-05	TUSC3	protein_coding
ENSG00000104760.17	1.31563	7.53671	7.58955	0.0245812	FGL1	protein_coding
ENSG00000254054.2	1.33234	5.4807	25.6001	0.000941371	AC087273.2	lincRNA
ENSG00000254064.1	1.7751	-1.12785	6.43733	0.034528	AC105206.2	antisense
ENSG00000197181.12	2.76091	0.323033	22.7486	0.00136205	PIWIL2	protein_coding
ENSG00000104635.14	1.29632	7.68561	25.0896	0.00100328	SLC39A14	protein_coding
ENSG00000245025.2	-1.74513	-1.43966	8.04712	0.0212871	AC107959.1	antisense
ENSG00000092964.18	1.62297	4.5968	45.8781	0.000133767	DPYSL2	protein_coding
ENSG00000120915.13	1.50532	4.20816	23.6848	0.00120193	EPHX2	protein_coding
ENSG00000168077.14	-1.42715	1.03873	15.6459	0.00409997	SCARA3	protein_coding
ENSG00000189233.12	2.3404	0.731207	32.9346	0.000415168	NUGGC	protein_coding
ENSG00000246339.5	-1.20083	0.58124	6.42286	0.0346825	EXTL3-AS1	antisense
ENSG00000156687.11	-5.61295	-1.84929	24.2488	0.00237129	UNC5D	protein_coding
ENSG00000253361.2	1.14063	2.17382	21.5642	0.00153463	AC069120.1	lincRNA
ENSG00000147526.20	1.27936	6.51937	48.5863	0.000100819	TACC1	protein_coding
ENSG00000169499.15	1.5596	4.12078	16.1554	0.00374822	PLEKHA2	protein_coding
ENSG00000176907.4	1.27394	6.12506	6.82111	0.0307281	TCIM	protein_coding
ENSG00000104371.5	1.56722	0.591168	13.7555	0.00583776	DKK4	protein_coding
ENSG00000248531.3	1.97659	-1.61124	7.42404	0.0256104	NDUFA5P12	unprocessed_pseudogene
ENSG00000196711.9	-2.07115	-0.476274	9.72593	0.0140414	ALKAL1	protein_coding
ENSG00000228862.4	-2.05533	-1.88435	6.41538	0.0344309	AC068389.1	lincRNA
ENSG00000198363.18	1.2035	9.05788	20.7283	0.0017863	ASPH	protein_coding
ENSG00000137561.4	1.39115	1.28109	15.1277	0.00450418	TTPA	protein_coding
ENSG00000172817.4	-1.7077	0.870316	12.0939	0.00819011	CYP7B1	protein_coding
ENSG00000253190.3	-1.28272	0.86127	11.259	0.00982241	AC084082.1	lincRNA
ENSG00000147573.17	-2.61044	0.998292	26.3761	0.000856133	TRIM55	protein_coding
ENSG00000185697.16	-1.52592	4.1104	27.721	0.000729995	MYBL1	protein_coding
ENSG00000104313.19	-1.90869	-1.34436	5.52718	0.0462341	EYA1	protein_coding
ENSG00000154589.6	2.21935	2.40478	28.9182	0.000636686	LY96	protein_coding
ENSG00000121005.9	-2.13094	-2.15122	5.86975	0.0408278	CRISPLD1	protein_coding
ENSG00000164683.17	1.05398	3.80636	10.386	0.0119908	HEY1	protein_coding
ENSG00000076554.15	1.36449	3.9233	13.3793	0.0062872	TPD52	protein_coding
ENSG00000260317.1	-2.31187	-1.74862	8.38692	0.0195666	AC009812.4	lincRNA
ENSG00000253598.1	2.56596	0.306882	14.8303	0.00475784	SLC10A5	protein_coding
ENSG00000164879.7	1.37866	0.0773451	13.1705	0.00637143	CA3	protein_coding
ENSG00000104267.10	-2.31179	2.70939	58.4222	5.66587e-05	CA2	protein_coding
ENSG00000175305.17	-1.06198	1.69261	10.5006	0.0116741	CCNE2	protein_coding
ENSG00000132561.14	-1.8076	1.99119	15.42	0.00427116	MATN2	protein_coding
ENSG00000104490.18	-1.29906	-0.945113	6.01427	0.0391014	NCALD	protein_coding
ENSG00000283959.1	-2.38618	-0.380852	7.91596	0.0224431	AP002851.1	bidirectional_promoter_lncRNA
ENSG00000147650.11	-1.1021	2.242	14.9071	0.00461235	LRP12	protein_coding
ENSG00000251003.8	1.93297	0.285995	16.84	0.00333151	ZFPM2-AS1	processed_transcript
ENSG00000147642.17	1.43843	2.80726	13.5418	0.00608792	SYBU	protein_coding
ENSG00000172164.15	1.33405	6.32281	12.2253	0.00796506	SNTB1	protein_coding
ENSG00000170873.18	1.52817	4.0259	39.3838	0.000226959	MTSS1	protein_coding
ENSG00000168672.4	-1.28379	4.60702	8.82759	0.0175962	FAM84B	protein_coding
ENSG00000282164.3	1.8212	3.17855	50.4406	9.27452e-05	PEG13	sense_intronic
ENSG00000254389.3	1.54882	-0.0704316	8.91572	0.0172008	RHPN1-AS1	antisense
ENSG00000182759.3	-1.18041	2.73121	7.16287	0.0277793	MAFA	protein_coding
ENSG00000255050.1	-2.46221	-0.409311	28.4664	0.000633603	AC067930.4	antisense
ENSG00000261150.2	-1.46892	7.15124	6.73697	0.0315141	EPPK1	protein_coding
ENSG00000261678.3	-1.99849	-1.67174	6.79994	0.0307832	SCRT1	protein_coding
ENSG00000137033.11	-2.38677	3.85497	15.9075	0.00391507	IL33	protein_coding
ENSG00000236924.1	2.5357	-0.531983	17.3367	0.00306501	AL162411.1	lincRNA
ENSG00000107077.18	1.06555	5.33638	7.40972	0.0258692	KDM4C	protein_coding
ENSG00000164946.19	1.98788	5.94564	6.94414	0.0296229	FREM1	protein_coding
ENSG00000283647.1	2.78209	-1.95468	5.55535	0.045802	AL512643.1	antisense
ENSG00000272842.1	1.27011	-0.945317	5.85043	0.0412539	AL391834.1	antisense
ENSG00000285911.1	-1.08838	0.293701	6.64914	0.0323618	AL391834.3	bidirectional_promoter_lncRNA
ENSG00000227071.1	-1.15058	-0.869695	6.70949	0.0313421	FOCAD-AS1	lincRNA
ENSG00000234840.1	1.33507	-1.28714	5.87936	0.0407002	LINC01239	lincRNA
ENSG00000231991.4	1.76372	2.58991	9.3452	0.0154261	ANXA2P2	processed_pseudogene
ENSG00000164976.9	1.09515	5.65384	10.7589	0.0109978	MYORG	protein_coding
ENSG00000168913.7	-1.97161	0.550926	16.001	0.00385111	ENHO	protein_coding
ENSG00000205143.2	-1.95317	-1.16612	6.37528	0.0351972	ARID3C	protein_coding
ENSG00000187186.14	-1.75651	-1.12946	10.2938	0.0119855	AL162231.1	protein_coding
ENSG00000230074.1	-1.92463	0.906051	14.0646	0.0054983	AL162231.2	antisense
ENSG00000137094.14	-1.30798	3.73524	12.3752	0.00771783	DNAJB5	protein_coding
ENSG00000122694.16	-1.60423	3.89444	10.543	0.0115596	GLIPR2	protein_coding
ENSG00000234160.1	-1.99175	0.583216	20.7718	0.00179784	AL513165.1	antisense
ENSG00000184906.11	2.40825	-2.13646	6.95077	0.0292769	AMYH02020865.1	transcribed_unprocessed_pseudogene
ENSG00000154529.14	1.18432	1.16779	12.1661	0.00799242	CNTNAP3B	protein_coding
ENSG00000236816.2	2.29337	0.396415	16.2479	0.00368828	ANKRD20A7P	unprocessed_pseudogene
ENSG00000170165.5	2.42119	-0.606715	30.5775	0.000500224	CR848007.1	unprocessed_pseudogene
ENSG00000230635.2	1.33492	-0.631136	5.43868	0.0476257	CYP4F60P	unprocessed_pseudogene
ENSG00000276591.1	2.22152	-1.48635	6.29552	0.0360816	GXYLT1P5	transcribed_processed_pseudogene
ENSG00000231527.6	-1.1485	0.00194176	6.35656	0.0354023	FAM27C	processed_transcript
ENSG00000186466.5	1.14763	0.0987269	11.4092	0.00926962	AQP7P1	unprocessed_pseudogene
ENSG00000232815.1	-1.10729	2.13792	6.56141	0.0332375	DUX4L50	unprocessed_pseudogene
ENSG00000181997.8	1.55496	-1.04923	8.46148	0.0190233	AQP7P2	unprocessed_pseudogene
ENSG00000280286.1	-2.57325	-1.937	7.33121	0.0264582	FRG1KP	unprocessed_pseudogene
ENSG00000276386.1	1.74066	1.67739	22.5693	0.00139569	CNTNAP3P2	unprocessed_pseudogene
ENSG00000107242.18	1.94926	2.07289	10.2031	0.0125191	PIP5K1B	protein_coding
ENSG00000165060.13	1.13634	2.81811	16.3667	0.00361301	FXN	protein_coding
ENSG00000119139.19	1.08826	3.7393	28.3936	0.000638945	TJP2	protein_coding
ENSG00000119125.16	3.89538	6.18076	28.195	0.000691134	GDA	protein_coding
ENSG00000235523.1	5.27327	-2.12104	7.18526	0.0359315	AL135924.2	lincRNA
ENSG00000233926.1	-3.37088	-1.9887	7.38978	0.0260172	AL591368.1	lincRNA
ENSG00000278988.1	2.38419	-1.59636	12.0023	0.008138	AL356490.1	TEC
ENSG00000213694.5	-1.11015	1.19023	5.47823	0.0469972	S1PR3	protein_coding
ENSG00000185920.15	1.04228	2.20405	13.3402	0.00623031	PTCH1	protein_coding
ENSG00000130958.13	1.22179	3.89278	22.2947	0.00144925	SLC35D2	protein_coding
ENSG00000136943.11	-1.66905	5.23671	51.4659	8.91885e-05	CTSV	protein_coding
ENSG00000228376.3	-2.57329	-1.94106	6.74747	0.0314146	GAS2L1P2	transcribed_processed_pseudogene
ENSG00000106789.13	-1.04628	5.0768	10.502	0.0116703	CORO2A	protein_coding
ENSG00000241697.5	-2.76957	-0.048029	50.649	8.68467e-05	TMEFF1	protein_coding
ENSG00000170681.6	-2.76494	-0.317669	14.3988	0.00515854	CAVIN4	protein_coding
ENSG00000148123.15	2.67654	2.82428	8.42805	0.0195394	PLPPR1	protein_coding
ENSG00000188959.9	1.55237	-0.359877	10.9163	0.0106098	C9orf152	protein_coding
ENSG00000165124.18	-1.5883	1.08045	6.94512	0.0296144	SVEP1	protein_coding
ENSG00000228623.6	1.30131	-0.0505649	8.74107	0.0179956	ZNF883	transcribed_unprocessed_pseudogene
ENSG00000138835.22	1.14643	4.01252	26.1272	0.000856885	RGS3	protein_coding
ENSG00000136883.14	1.29682	2.29128	16.6992	0.00341232	KIF12	protein_coding
ENSG00000095397.14	-1.18646	5.77764	8.92904	0.017142	WHRN	protein_coding
ENSG00000182752.10	-1.32298	2.01318	16.9678	0.00326026	PAPPA	protein_coding
ENSG00000056558.11	-1.2412	1.21839	19.0082	0.00225127	TRAF1	protein_coding
ENSG00000185585.20	-2.0668	2.96411	7.44944	0.0255775	OLFML2A	protein_coding
ENSG00000271833.1	-1.21649	-0.614231	6.90754	0.0295233	AL445222.1	sense_intronic
ENSG00000136854.21	-1.32192	3.61751	11.8916	0.00855225	STXBP1	protein_coding
ENSG00000167103.12	-2.2235	0.112159	7.34184	0.0263775	PIP5KL1	protein_coding
ENSG00000148346.12	1.79073	-1.27605	7.30263	0.0266768	LCN2	protein_coding
ENSG00000106976.20	1.32011	1.66625	18.4316	0.00249942	DNM1	protein_coding
ENSG00000148357.16	-1.88028	0.375755	6.57433	0.0331067	HMCN2	protein_coding
ENSG00000196358.11	-1.80729	-0.751735	8.04789	0.0216457	NTNG2	protein_coding
ENSG00000197859.10	1.69644	3.09541	37.7635	0.000261964	ADAMTSL2	protein_coding
ENSG00000197191.5	-1.08945	5.17493	10.9468	0.0105364	CYSRT1	protein_coding
ENSG00000233198.3	-1.3329	1.02001	11.9927	0.00836888	RNF224	protein_coding
ENSG00000198569.9	-1.19635	1.81122	9.88449	0.013511	SLC34A3	protein_coding
ENSG00000198435.4	-1.07795	3.25148	21.7244	0.00149994	NRARP	protein_coding
ENSG00000067057.17	1.10689	3.24	9.43453	0.0150864	PFKP	protein_coding
ENSG00000215267.8	1.63436	-1.48777	6.157	0.0373811	AKR1C7P	transcribed_unprocessed_pseudogene
ENSG00000231483.1	2.75486	-1.63704	7.93447	0.0223291	AL365356.4	lincRNA
ENSG00000134461.16	-1.04801	2.56569	22.0435	0.00143372	ANKRD16	protein_coding
ENSG00000134470.21	1.45082	0.520878	12.4724	0.0075626	IL15RA	protein_coding
ENSG00000107485.17	-2.70097	0.420204	25.7966	0.000918827	GATA3	protein_coding
ENSG00000197308.9	-3.67915	-1.2576	16.2433	0.00369124	GATA3-AS1	lincRNA
ENSG00000151468.11	-2.66578	2.91456	12.821	0.00703706	CCDC3	protein_coding
ENSG00000165985.10	-1.37032	2.0176	7.01381	0.0290194	C1QL3	protein_coding
ENSG00000204682.6	-1.64725	3.40339	44.1926	0.000147986	CASC10	protein_coding
ENSG00000222071.1	-1.91203	-1.34547	8.51023	0.0189819	MIR1915	miRNA
ENSG00000180592.16	-1.30235	-0.386696	5.53236	0.0461543	SKIDA1	protein_coding
ENSG00000283709.1	-1.44253	-0.872777	7.24409	0.0269929	FAM238C	transcribed_unprocessed_pseudogene
ENSG00000230445.4	-1.95487	-1.15742	10.076	0.0127962	LRRC37A6P	transcribed_processed_pseudogene
ENSG00000177283.7	-1.89698	1.46703	31.6002	0.000468061	FZD8	protein_coding
ENSG00000185904.11	-1.53338	-1.40422	6.11504	0.0377208	LINC00839	lincRNA
ENSG00000259869.2	-1.94145	-1.70645	5.79025	0.0423917	AL022344.1	lincRNA
ENSG00000165731.19	-1.92484	0.319254	10.1408	0.0127056	RET	protein_coding
ENSG00000237590.1	2.98938	-1.22036	7.91259	0.022464	AL137026.2	lincRNA
ENSG00000165507.8	1.45454	5.82795	16.2516	0.00368591	DEPP1	protein_coding
ENSG00000150175.13	-1.37804	0.590504	11.2612	0.00981773	FRMPD2B	unprocessed_pseudogene
ENSG00000264404.2	1.28007	-0.654484	7.11787	0.0279047	BX547991.1	lincRNA
ENSG00000128805.14	-1.41741	2.05314	10.512	0.0116432	ARHGAP22	protein_coding
ENSG00000165471.6	1.67566	5.11135	20.6901	0.00181936	MBL2	protein_coding
ENSG00000171988.19	1.36009	6.00969	10.8045	0.0108835	JMJD1C	protein_coding
ENSG00000108176.15	2.66376	1.46745	5.7781	0.04256	DNAJC12	protein_coding
ENSG00000156510.13	1.64544	4.43624	61.2174	4.3584e-05	HKDC1	protein_coding
ENSG00000075073.14	-1.68586	-1.05655	8.21146	0.0206179	TACR2	protein_coding
ENSG00000171224.9	1.06985	1.74022	10.0233	0.0130672	FAM241B	protein_coding
ENSG00000107719.9	-1.53407	0.424475	10.0387	0.0130191	PALD1	protein_coding
ENSG00000138315.13	1.35334	0.717647	11.8449	0.00863873	OIT3	protein_coding
ENSG00000138308.5	1.14967	2.50626	10.1504	0.0126768	PLA2G12B	protein_coding
ENSG00000133678.14	1.09863	3.16647	8.76074	0.0179038	TMEM254	protein_coding
ENSG00000270002.1	-1.54628	-0.922928	5.9405	0.0403783	AC022028.2	antisense
ENSG00000173267.14	1.37647	1.74174	12.9042	0.00691846	SNCG	protein_coding
ENSG00000198682.13	-1.10093	0.818542	8.49691	0.0191859	PAPSS2	protein_coding
ENSG00000227268.3	-1.08847	2.09933	8.38862	0.0197455	KLLN	protein_coding
ENSG00000138134.12	2.6435	1.01533	23.6695	0.00120434	STAMBPL1	protein_coding
ENSG00000119922.10	1.60455	-1.13215	9.59684	0.0141983	IFIT2	protein_coding
ENSG00000119917.14	1.50872	0.849765	15.1781	0.00446287	IFIT3	protein_coding
ENSG00000224750.6	-2.78314	-1.20511	6.25798	0.0365077	AL391704.1	lincRNA
ENSG00000107864.15	1.10806	1.78708	11.0955	0.0101885	CPEB3	protein_coding
ENSG00000095596.12	-1.90228	0.238756	5.37797	0.0486113	CYP26A1	protein_coding
ENSG00000108231.13	2.32515	1.07958	33.1498	0.000406264	LGI1	protein_coding
ENSG00000280660.1	2.00738	-0.553913	8.20181	0.0207601	AL157396.1	sense_intronic
ENSG00000108242.13	-2.3996	-1.71129	8.61568	0.0185426	CYP2C18	protein_coding
ENSG00000095587.9	-1.45421	0.895757	7.29895	0.0267051	TLL2	protein_coding
ENSG00000225850.3	-2.70289	-1.52079	11.3564	0.0096121	AL355490.1	bidirectional_promoter_lncRNA
ENSG00000241935.9	-1.28734	3.56256	13.6144	0.0060014	HOGA1	protein_coding
ENSG00000120057.5	-3.62714	-1.84367	12.337	0.00777986	SFRP5	protein_coding
ENSG00000095713.14	-2.5949	3.18558	25.2667	0.000981246	CRTAC1	protein_coding
ENSG00000107819.13	1.24364	4.58003	17.213	0.00312882	SFXN3	protein_coding
ENSG00000227128.4	-2.53079	-1.63758	6.85241	0.030442	LBX1-AS1	processed_transcript
ENSG00000119915.5	-1.22549	1.27852	5.40324	0.0481979	ELOVL3	protein_coding
ENSG00000107859.10	-2.14327	-1.59293	6.64722	0.0323806	PITX3	protein_coding
ENSG00000059915.17	-1.56202	-0.996322	7.22349	0.0272942	PSD	protein_coding
ENSG00000273108.1	-2.23253	-2.09207	6.1005	0.0380034	AL121929.2	antisense
ENSG00000119913.5	-1.18281	3.50866	11.6761	0.00896056	TECTB	protein_coding
ENSG00000243316.7	2.07247	-1.5635	5.33228	0.04937	GUCY2GP	transcribed_unitary_pseudogene
ENSG00000148702.15	-1.81655	1.90178	28.2472	0.000687016	HABP2	protein_coding
ENSG00000188613.7	-1.51869	2.0492	24.8	0.00102558	NANOS1	protein_coding
ENSG00000148908.15	1.20559	1.8098	14.4415	0.00511559	RGS10	protein_coding
ENSG00000270300.2	3.46754	-1.55766	9.81992	0.0137239	PHACTR2P1	transcribed_processed_pseudogene
ENSG00000066468.22	-1.82206	4.63026	13.7267	0.00587072	FGFR2	protein_coding
ENSG00000226864.2	-1.70027	-1.62543	7.51079	0.0247446	ATE1-AS1	transcribed_unitary_pseudogene
ENSG00000188620.10	1.20327	0.140721	6.52985	0.0335598	HMX3	protein_coding
ENSG00000283095.1	2.2856	-0.960729	14.4559	0.00510318	FP565171.1	lincRNA
ENSG00000235010.1	-3.74743	-1.76017	9.94581	0.0133126	AL512622.1	antisense
ENSG00000151640.13	-1.32729	6.8879	6.41867	0.0347275	DPYSL4	protein_coding
ENSG00000171811.14	-1.18574	-0.21247	8.1512	0.0207066	CFAP46	protein_coding
ENSG00000151651.16	-2.26045	0.806178	29.1825	0.000618131	ADAM8	protein_coding
ENSG00000255026.1	-1.39182	-1.09867	6.53683	0.0330442	AC136475.3	antisense
ENSG00000185201.16	2.08004	4.67146	10.7672	0.0109769	IFITM2	protein_coding
ENSG00000251661.3	1.24357	-0.670605	7.71075	0.0233784	AC136475.1	antisense
ENSG00000142089.16	1.19141	6.16394	10.0354	0.0130293	IFITM3	protein_coding
ENSG00000270030.1	2.25242	-0.734602	15.5544	0.00416907	AC136475.7	lincRNA
ENSG00000255328.1	1.88025	-1.34624	9.93891	0.0130536	AC136475.5	lincRNA
ENSG00000185187.13	1.3298	-0.831861	6.39063	0.0349458	SIGIRR	protein_coding
ENSG00000254815.5	-1.05513	-0.225178	6.53302	0.0330831	AP006284.1	antisense
ENSG00000177156.11	1.031	7.15537	27.2414	0.000731501	TALDO1	protein_coding
ENSG00000274897.3	-2.22541	-0.369634	12.4239	0.00763957	PANO1	protein_coding
ENSG00000205869.2	-1.42589	-0.295841	7.80739	0.0231273	KRTAP5-1	protein_coding
ENSG00000167244.20	-1.31257	4.22132	8.27815	0.0203377	IGF2	protein_coding
ENSG00000099869.7	-1.83476	-0.497157	10.5884	0.0114385	IGF2-AS	antisense
ENSG00000064201.15	2.16623	-0.903969	14.8515	0.0046946	TSPAN32	protein_coding
ENSG00000110628.14	1.00857	4.89833	8.08654	0.021419	SLC22A18	protein_coding
ENSG00000166341.8	-2.38272	-1.21851	16.7703	0.00325259	DCHS1	protein_coding
ENSG00000183378.11	-1.51682	-0.579793	9.4499	0.0149529	OVCH2	protein_coding
ENSG00000176716.5	-1.94172	-0.770677	13.9513	0.0055089	OR10AB1P	transcribed_unprocessed_pseudogene
ENSG00000166402.8	-1.24968	4.19113	10.031	0.0130432	TUB	protein_coding
ENSG00000175356.13	-1.03204	-0.713954	6.41866	0.0342768	SCUBE2	protein_coding
ENSG00000133812.15	1.29619	5.44792	19.1391	0.00229633	SBF2	protein_coding
ENSG00000133805.15	1.53856	2.71765	26.2387	0.000870501	AMPD3	protein_coding
ENSG00000133800.8	1.33133	1.68071	13.5672	0.00605754	LYVE1	protein_coding
ENSG00000050165.17	-2.6777	0.159248	16.8037	0.00335212	DKK3	protein_coding
ENSG00000175868.14	-3.15398	-1.59823	15.5011	0.00410744	CALCB	protein_coding
ENSG00000110693.17	1.14651	3.23445	12.9671	0.00683048	SOX6	protein_coding
ENSG00000179817.5	2.18129	-1.01033	8.69538	0.0182111	MRGPRX4	protein_coding
ENSG00000110756.17	-1.21159	5.5298	35.0835	0.000322097	HPS5	protein_coding
ENSG00000148935.11	2.09018	3.4226	10.7316	0.011067	GAS2	protein_coding
ENSG00000198168.9	1.17313	3.91273	6.56355	0.0332158	SVIP	protein_coding
ENSG00000228061.6	1.67418	-1.78062	6.0822	0.0381191	AC131571.1	antisense
ENSG00000007372.22	2.44615	3.91382	113.384	4.24238e-06	PAX6	protein_coding
ENSG00000281880.2	1.91458	-0.925865	6.81234	0.0308089	PAUPAR	processed_transcript
ENSG00000121691.6	1.34571	6.64716	25.2537	0.000982844	CAT	protein_coding
ENSG00000135374.9	2.43746	1.52867	45.5972	0.000136673	ELF5	protein_coding
ENSG00000179241.13	-1.30712	2.08505	21.6817	0.00150909	LDLRAD3	protein_coding
ENSG00000135362.14	-1.36408	-0.746545	5.43506	0.0476838	PRR5L	protein_coding
ENSG00000052850.7	-1.62382	-1.66666	5.40979	0.047581	ALX4	protein_coding
ENSG00000157570.11	-2.1916	2.54778	6.89819	0.0300297	TSPAN18	protein_coding
ENSG00000110492.15	-1.18373	8.79579	17.1119	0.00318219	MDK	protein_coding
ENSG00000180720.7	-3.04412	1.05306	35.0659	0.000336615	CHRM4	protein_coding
ENSG00000247675.6	-1.67749	-0.458027	12.7043	0.00711703	LRP4-AS1	antisense
ENSG00000149131.15	-1.19399	1.81713	6.28668	0.0361813	SERPING1	protein_coding
ENSG00000254602.1	-1.84165	-1.37674	10.1258	0.0124769	AP000662.1	sense_overlapping
ENSG00000183134.5	2.22376	1.69951	39.8411	0.000218153	PTGDR2	protein_coding
ENSG00000013725.14	-2.04372	-1.88803	8.72503	0.0177395	CD6	protein_coding
ENSG00000256713.7	-1.05777	-0.848971	5.59338	0.0447274	PGA5	protein_coding
ENSG00000149476.15	1.08297	5.12079	26.0569	0.000881444	TKFC	protein_coding
ENSG00000011347.9	-1.49191	2.67592	23.1791	0.0012853	SYT7	protein_coding
ENSG00000243742.5	-1.00988	0.64828	7.24587	0.0270868	RPLP0P2	transcribed_processed_pseudogene
ENSG00000124915.10	1.63076	-1.01191	9.78932	0.0135394	AP002380.1	lincRNA
ENSG00000134824.14	-1.2637	4.69619	30.3035	0.000546547	FADS2	protein_coding
ENSG00000124935.4	-2.58069	-1.34659	7.53889	0.0249357	SCGB1D2	protein_coding
ENSG00000176485.11	2.04883	2.40896	14.6043	0.00496266	PLA2G16	protein_coding
ENSG00000278952.1	-1.70942	-0.43328	7.47529	0.0253899	AP003068.4	TEC
ENSG00000197847.12	-1.28621	0.573744	11.8414	0.00856157	SLC22A20P	transcribed_unitary_pseudogene
ENSG00000245532.8	1.05729	10.3611	9.96199	0.0132609	NEAT1	lincRNA
ENSG00000175294.5	1.05101	-0.439846	7.29921	0.0263015	CATSPER1	protein_coding
ENSG00000179292.5	-1.33106	0.401611	10.3402	0.0121205	TMEM151A	protein_coding
ENSG00000173599.14	1.09741	5.75119	15.806	0.00398608	PC	protein_coding
ENSG00000250508.1	2.4545	-0.0967753	12.5617	0.00742345	AP000808.1	lincRNA
ENSG00000186642.16	-1.81253	3.20424	7.78379	0.0232794	PDE2A	protein_coding
ENSG00000171631.14	1.34146	2.34548	6.76234	0.0312744	P2RY6	protein_coding
ENSG00000021300.14	1.05778	5.3924	20.5048	0.00186935	PLEKHB1	protein_coding
ENSG00000175538.10	2.74403	0.572504	25.0543	0.00100774	KCNE3	protein_coding
ENSG00000137491.14	1.83573	4.29531	31.0002	0.000507234	SLCO2B1	protein_coding
ENSG00000149243.15	-1.97102	-1.12424	8.98901	0.0168804	KLHL35	protein_coding
ENSG00000254933.1	-2.28683	-1.11249	10.0001	0.0131401	AP000785.1	antisense
ENSG00000255362.1	-1.56348	-1.37879	5.53209	0.0460804	AP000785.2	lincRNA
ENSG00000137513.10	1.03338	5.05259	7.2321	0.0272261	NARS2	protein_coding
ENSG00000280339.1	1.79282	-1.72707	5.80363	0.041997	AP001528.3	TEC
ENSG00000166575.17	1.21891	6.32066	7.165	0.0277621	TMEM135	protein_coding
ENSG00000077616.11	1.21123	3.8226	10.4532	0.0118038	NAALAD2	protein_coding
ENSG00000261645.6	2.08829	-0.121764	23.1913	0.00124601	DISC1FP1	processed_transcript
ENSG00000250519.6	-2.11721	-1.84696	7.63031	0.0239163	AP002784.1	lincRNA
ENSG00000149212.11	-1.82654	4.12999	61.93	4.46806e-05	SESN3	protein_coding
ENSG00000184384.14	1.78712	5.19621	46.1474	0.000131053	MAML2	protein_coding
ENSG00000137673.9	2.76847	0.408728	24.8987	0.00102773	MMP7	protein_coding
ENSG00000196954.14	1.13286	5.76065	14.204	0.00535331	CASP4	protein_coding
ENSG00000137752.24	-1.07583	1.4393	7.89057	0.0226008	CASP1	protein_coding
ENSG00000285813.1	-1.03806	-0.711283	6.22412	0.0364352	AP000813.1	antisense
ENSG00000182359.15	1.38852	1.92252	21.3745	0.00160263	KBTBD3	protein_coding
ENSG00000152402.10	-1.48323	0.390276	17.4558	0.00289552	GUCY1A2	protein_coding
ENSG00000110723.12	-1.03536	-0.0100028	9.15404	0.0158735	EXPH5	protein_coding
ENSG00000254416.5	1.97117	0.903353	14.6172	0.00495067	AP000924.1	lincRNA
ENSG00000214290.8	1.13764	4.09918	6.17844	0.0374316	COLCA2	protein_coding
ENSG00000254990.5	2.00158	1.27103	41.232	0.000180214	AP001781.1	lincRNA
ENSG00000149295.14	-2.69498	-1.2578	13.4252	0.00623006	DRD2	protein_coding
ENSG00000255710.2	2.20544	-1.69991	5.77187	0.0426466	AP003170.1	processed_pseudogene
ENSG00000180425.11	1.12203	2.75467	7.70461	0.0237993	C11orf71	protein_coding
ENSG00000255580.1	-1.91958	-1.71377	7.11202	0.0277829	AP000462.1	lincRNA
ENSG00000237937.5	-1.97192	-0.750325	13.7877	0.0057383	AP000770.1	lincRNA
ENSG00000110244.7	1.79111	1.04801	6.70977	0.0317735	APOA4	protein_coding
ENSG00000186318.16	-1.07914	5.17446	11.7385	0.0088398	BACE1	protein_coding
ENSG00000276505.1	-1.36947	-0.927977	5.56287	0.0456876	AP000892.2	sense_intronic
ENSG00000177103.14	-1.58913	1.80288	16.7907	0.00335951	DSCAML1	protein_coding
ENSG00000177098.8	-1.35581	2.26392	6.11973	0.0381325	SCN4B	protein_coding
ENSG00000160593.18	1.73333	2.81009	16.4718	0.00354799	JAML	protein_coding
ENSG00000149573.9	1.94829	5.90414	13.1059	0.00664119	MPZL2	protein_coding
ENSG00000280032.1	3.02185	-0.759794	12.5044	0.00751225	AP002800.1	TEC
ENSG00000110375.3	-2.31812	-1.08147	16.9468	0.00315568	UPK2	protein_coding
ENSG00000137699.17	-1.69873	2.03647	8.24792	0.0205036	TRIM29	protein_coding
ENSG00000109927.10	-1.40885	0.90904	14.0087	0.00555785	TECTA	protein_coding
ENSG00000246790.2	2.75624	-0.360508	6.78422	0.0310696	AP000977.1	antisense
ENSG00000137642.13	1.41077	7.88863	17.2202	0.00312506	SORL1	protein_coding
ENSG00000166257.8	-2.14016	2.44293	13.2529	0.00644777	SCN3B	protein_coding
ENSG00000110002.15	2.04344	0.258116	20.1812	0.00196088	VWA5A	protein_coding
ENSG00000255045.1	1.74634	-1.57218	7.72474	0.0232863	AP000866.5	antisense
ENSG00000245498.6	-1.16295	2.72876	13.2928	0.0063965	AP000866.1	antisense
ENSG00000154133.14	1.38438	0.327157	5.66457	0.0441746	ROBO4	protein_coding
ENSG00000187686.4	-1.8094	0.301502	11.4915	0.00932977	KRT18P59	transcribed_processed_pseudogene
ENSG00000165495.16	-1.68023	-0.653734	5.55651	0.0457844	PKNOX2	protein_coding
ENSG00000150455.13	1.3991	3.33185	43.6378	0.000147668	TIRAP	protein_coding
ENSG00000255062.1	1.5412	0.833257	19.74	0.00201482	AP001318.2	antisense
ENSG00000174370.9	-1.84278	-0.229364	5.85747	0.0414755	C11orf45	protein_coding
ENSG00000151715.7	1.22162	7.1894	7.06878	0.0285541	TMEM45B	protein_coding
ENSG00000109956.13	-3.24707	-2.04482	10.227	0.0123528	B3GAT1	protein_coding
ENSG00000139044.11	-1.72343	3.51334	23.6127	0.00121339	B4GALNT3	protein_coding
ENSG00000250132.6	1.03128	0.790557	6.72706	0.0316082	AC004803.1	antisense
ENSG00000111186.13	-2.60149	-0.885058	6.0345	0.0391803	WNT5B	protein_coding
ENSG00000166159.11	2.52003	-2.07891	6.81347	0.0307984	LRTM2	protein_coding
ENSG00000250770.3	-1.19697	2.4601	5.89827	0.0409317	AC005865.2	transcribed_unprocessed_pseudogene
ENSG00000111254.8	1.43903	-0.26155	9.64905	0.014308	AKAP3	protein_coding
ENSG00000111665.11	-1.17333	5.09834	11.4174	0.00948331	CDCA3	protein_coding
ENSG00000215241.3	-2.79451	-1.4599	7.19559	0.0275161	LINC02449	lincRNA
ENSG00000226091.7	-2.72306	-1.85065	8.56505	0.018844	LINC00937	lincRNA
ENSG00000245105.3	1.44057	0.809872	16.7097	0.0033279	A2M-AS1	antisense
ENSG00000175899.14	2.03816	11.6315	16.6966	0.00341382	A2M	protein_coding
ENSG00000278635.1	1.53103	-0.2524	10.653	0.0112691	AC141557.2	unprocessed_pseudogene
ENSG00000257027.1	1.34978	0.53626	13.4578	0.00607383	AC010186.3	sense_intronic
ENSG00000139112.11	1.19788	5.72034	44.8715	0.000133813	GABARAPL1	protein_coding
ENSG00000245648.1	-2.53389	3.0923	13.5291	0.00610315	AC022075.1	antisense
ENSG00000213809.9	-2.22041	-1.34889	7.18761	0.02758	KLRK1	protein_coding
ENSG00000013588.8	1.7328	3.84409	12.0883	0.00819987	GPRC5A	protein_coding
ENSG00000111291.8	1.34276	-0.0677754	9.58382	0.0145392	GPRC5D	protein_coding
ENSG00000111339.12	1.97623	3.3358	34.0481	0.000371571	ART4	protein_coding
ENSG00000139055.7	-1.71476	3.35677	12.6554	0.00728085	ERP27	protein_coding
ENSG00000008394.13	1.37097	6.56943	26.7906	0.000814542	MGST1	protein_coding
ENSG00000255745.1	1.04936	2.52672	9.62644	0.0143876	AC023796.1	lincRNA
ENSG00000060982.15	1.10099	2.53851	9.28613	0.0156561	BCAT1	protein_coding
ENSG00000246695.7	-1.0616	1.09579	11.0618	0.0100243	RASSF8-AS1	antisense
ENSG00000123095.6	1.77611	-1.25954	7.75564	0.0234589	BHLHE41	protein_coding
ENSG00000133687.16	1.29693	2.28366	13.9915	0.00557629	TMTC1	protein_coding
ENSG00000110900.15	-1.76636	4.18327	10.3778	0.012014	TSPAN11	protein_coding
ENSG00000270926.1	2.54689	-2.07668	6.10133	0.0383557	AC008013.3	unprocessed_pseudogene
ENSG00000177359.20	-1.56314	-0.563722	6.65167	0.0323369	AC024940.2	transcribed_unprocessed_pseudogene
ENSG00000177340.5	-1.47568	0.352777	6.06823	0.0387614	AC024940.1	antisense
ENSG00000151746.14	1.66236	1.76082	19.0708	0.00232073	BICD1	protein_coding
ENSG00000139132.14	1.17104	4.18592	20.0626	0.00199581	FGD4	protein_coding
ENSG00000188906.16	-2.34175	-1.47741	12.3608	0.00753708	LRRK2	protein_coding
ENSG00000018236.15	-1.14402	0.174712	8.74588	0.0177298	CNTN1	protein_coding
ENSG00000139168.8	1.0285	4.49931	7.29397	0.0267435	ZCRB1	protein_coding
ENSG00000186897.5	-1.96883	-1.48619	5.3428	0.049194	C1QL4	protein_coding
ENSG00000258057.5	-1.51594	-0.62473	6.10496	0.0383116	BCDIN3D-AS1	antisense
ENSG00000167588.13	2.01144	2.12887	32.5897	0.00042995	GPD1	protein_coding
ENSG00000110911.15	1.33935	6.22025	6.26895	0.0363824	SLC11A2	protein_coding
ENSG00000284730.1	-1.62586	-0.140047	16.4879	0.00341562	AC068987.5	protein_coding
ENSG00000261308.2	-1.5592	0.30666	8.36965	0.0198456	FIGNL2	protein_coding
ENSG00000167780.12	1.45541	4.31774	16.8235	0.00334086	SOAT2	protein_coding
ENSG00000172819.17	-1.54104	0.847168	9.49837	0.0148493	RARG	protein_coding
ENSG00000180806.5	1.07194	0.643542	9.87984	0.0132428	HOXC9	protein_coding
ENSG00000250742.3	-3.22381	-0.239193	17.4814	0.00299241	LINC02381	lincRNA
ENSG00000170439.7	1.79133	3.25828	27.8871	0.000716075	METTL7B	protein_coding
ENSG00000065361.15	1.41016	6.17206	33.6982	0.000384627	ERBB3	protein_coding
ENSG00000139540.12	1.60743	4.17484	30.7007	0.000523683	SLC39A5	protein_coding
ENSG00000175336.10	1.67868	2.01536	8.45703	0.0193896	APOF	protein_coding
ENSG00000166866.13	1.0802	1.88604	9.52341	0.0147576	MYO1A	protein_coding
ENSG00000182379.10	-2.28226	2.74078	15.6913	0.00406825	NXPH4	protein_coding
ENSG00000175189.4	1.4555	1.92301	17.636	0.00291721	INHBC	protein_coding
ENSG00000155980.12	2.04968	3.6224	29.9036	0.000570834	KIF5A	protein_coding
ENSG00000135454.14	1.44388	4.62159	15.2491	0.00440552	B4GALNT1	protein_coding
ENSG00000118596.12	-1.02736	-0.251052	7.04088	0.0283734	SLC16A7	protein_coding
ENSG00000257354.2	-1.11252	0.982376	11.2746	0.00955319	AC048341.1	lincRNA
ENSG00000174099.11	-1.02049	0.815675	6.40372	0.0348885	MSRB3	protein_coding
ENSG00000277945.1	1.65391	-1.11308	6.02482	0.0393015	AC107308.1	sense_intronic
ENSG00000247131.5	-1.7252	-1.4471	6.69473	0.0316636	AC025263.1	antisense
ENSG00000135643.5	-1.77399	0.621899	15.408	0.00428044	KCNMB4	protein_coding
ENSG00000277247.1	-3.43098	-1.93885	9.48479	0.0148993	AC083809.1	antisense
ENSG00000175183.10	-1.31274	3.86015	47.981	0.00010544	CSRP2	protein_coding
ENSG00000165891.16	-1.05788	6.20333	16.3569	0.00361914	E2F7	protein_coding
ENSG00000274021.1	1.14225	0.275624	10.1833	0.0123059	AC024909.1	antisense
ENSG00000271614.1	-1.32906	0.265351	13.3449	0.00615057	ATP2B1-AS1	lincRNA
ENSG00000258365.1	1.69038	-1.45738	6.92716	0.0294326	AC073655.2	antisense
ENSG00000028203.18	1.08821	5.89856	11.7009	0.00891236	VEZT	protein_coding
ENSG00000265917.1	2.38746	-0.417605	14.3519	0.00520463	MIR3685	miRNA
ENSG00000012504.15	1.30237	3.91994	15.6985	0.00406299	NR1H4	protein_coding
ENSG00000151572.18	-2.19129	0.607672	7.85882	0.0228	ANO4	protein_coding
ENSG00000196091.13	1.38272	0.815268	10.7019	0.0111429	MYBPC1	protein_coding
ENSG00000139351.15	1.25867	0.274376	12.2901	0.00765117	SYCP3	protein_coding
ENSG00000281344.1	-1.06865	1.23127	9.71755	0.014042	HELLPAR	macro_lncRNA
ENSG00000017427.16	-2.36253	-1.71088	7.01627	0.0289984	IGF1	protein_coding
ENSG00000120820.12	-1.03456	-0.016015	6.73011	0.031257	GLT8D2	protein_coding
ENSG00000166046.11	1.15957	4.24115	23.8292	0.00117936	TCP11L2	protein_coding
ENSG00000256139.2	1.09881	-0.756513	6.27806	0.03582	AC007637.1	sense_overlapping
ENSG00000122986.13	-1.13685	1.76201	15.5517	0.00403416	HVCN1	protein_coding
ENSG00000089127.13	1.80969	4.46114	75.0706	2.04282e-05	OAS1	protein_coding
ENSG00000135144.7	-2.08648	1.58538	5.89476	0.0409782	DTX1	protein_coding
ENSG00000088992.18	1.07706	5.06995	26.2286	0.00085651	TESC	protein_coding
ENSG00000183273.7	-1.38835	2.90438	10.5804	0.0114597	CCDC60	protein_coding
ENSG00000170890.14	1.36278	-0.740291	8.1709	0.020577	PLA2G1B	protein_coding
ENSG00000135097.7	-1.62586	1.79118	13.0472	0.00672043	MSI1	protein_coding
ENSG00000157782.9	-3.44084	-1.41501	14.0996	0.00546145	CABP1	protein_coding
ENSG00000176383.9	-1.32678	-0.939048	8.04728	0.0212861	B3GNT4	protein_coding
ENSG00000182782.7	-1.07459	3.4574	18.4576	0.00255501	HCAR2	protein_coding
ENSG00000196917.5	2.10719	2.0838	30.7746	0.000519563	HCAR1	protein_coding
ENSG00000130783.13	-1.23318	-0.302041	6.11395	0.0382025	CCDC62	protein_coding
ENSG00000256092.2	-1.46876	2.26868	27.5692	0.000707122	AC137767.1	lincRNA
ENSG00000197653.15	-1.33764	2.60237	7.01479	0.029011	DNAH10	protein_coding
ENSG00000119242.8	-1.0861	5.03077	6.74583	0.0314301	CCDC92	protein_coding
ENSG00000139364.10	-1.42868	0.082997	8.72322	0.0180794	TMEM132B	protein_coding
ENSG00000249267.6	-1.64493	-0.653401	12.2037	0.00779337	LINC00939	lincRNA
ENSG00000111452.13	-1.32337	0.662411	12	0.00835579	ADGRD1	protein_coding
ENSG00000172458.4	-2.24288	0.944263	23.2686	0.00127002	IL17D	protein_coding
ENSG00000253771.6	3.41513	-2.07927	12.0912	0.00805439	TPTE2P1	transcribed_unprocessed_pseudogene
ENSG00000132932.17	-1.04815	0.88562	6.02096	0.03935	ATP8A2	protein_coding
ENSG00000073910.21	1.13767	3.62428	18.0913	0.00270909	FRY	protein_coding
ENSG00000133121.21	1.12741	3.92193	29.5529	0.000560077	STARD13	protein_coding
ENSG00000183722.9	-2.79483	-0.741727	28.0661	0.000663695	LHFPL6	protein_coding
ENSG00000237361.2	1.08111	0.592245	8.73302	0.0178933	TUSC8	lincRNA
ENSG00000139679.15	2.02547	4.98385	8.12506	0.0211959	LPAR6	protein_coding
ENSG00000231665.1	-1.78567	-1.40935	9.50675	0.0145205	OGFOD1P1	processed_pseudogene
ENSG00000102539.5	-1.73158	1.25842	12.1469	0.00809837	MLNR	protein_coding
ENSG00000136169.16	1.14862	3.82671	16.9871	0.00324971	SETDB2	protein_coding
ENSG00000253309.6	-3.33403	-1.50335	5.45919	0.0472986	SERPINE3	protein_coding
ENSG00000118922.17	1.48922	1.55257	7.82816	0.0229944	KLF12	protein_coding
ENSG00000178695.5	-2.82365	-0.745174	14.2713	0.005285	KCTD12	protein_coding
ENSG00000179399.15	-1.52032	-1.54461	5.63868	0.0440568	GPC5	protein_coding
ENSG00000223392.1	2.35038	-1.23347	7.4689	0.0254361	CLDN10-AS1	antisense
ENSG00000260992.1	-3.14491	-2.09795	5.37691	0.0486286	DOCK9-DT	antisense
ENSG00000125246.15	1.10277	3.08173	16.5772	0.00348428	CLYBL	protein_coding
ENSG00000041515.16	-1.5743	-1.88896	5.3377	0.0487644	MYO16	protein_coding
ENSG00000187498.16	-1.56131	-0.130613	6.77631	0.0311434	COL4A1	protein_coding
ENSG00000057593.13	1.90916	2.77946	17.9647	0.00276506	F7	protein_coding
ENSG00000222489.1	-1.03207	-0.458312	6.57568	0.0326513	SNORA79B	snoRNA
ENSG00000258818.4	1.49845	-0.205092	11.5461	0.00916001	RNASE4	protein_coding
ENSG00000165799.5	1.16198	0.680613	5.73938	0.0431021	RNASE7	protein_coding
ENSG00000157227.13	-1.30953	6.19639	11.7887	0.00874416	MMP14	protein_coding
ENSG00000139890.10	-2.79188	-1.80423	9.66506	0.014252	REM2	protein_coding
ENSG00000139880.19	-1.77953	4.2815	5.9463	0.0403031	CDH24	protein_coding
ENSG00000139914.6	1.34015	-0.423703	6.87833	0.0302078	FITM1	protein_coding
ENSG00000092010.15	-1.06501	6.9648	29.4377	0.000567352	PSME1	protein_coding
ENSG00000259529.2	-1.08038	-0.204442	7.87264	0.0223411	AL136295.5	protein_coding
ENSG00000092009.10	-1.98899	-1.0999	8.13661	0.0211296	CMA1	protein_coding
ENSG00000203546.7	-2.05471	-0.0510524	20.1656	0.00196545	AL139353.1	protein_coding
ENSG00000258474.1	1.64015	1.6938	27.4062	0.000733663	LINC02313	lincRNA
ENSG00000206596.1	-2.55192	-1.34542	16.7769	0.00324891	RNU1-27P	snRNA
ENSG00000206588.1	-3.66112	-0.543422	43.3042	0.000151716	RNU1-28P	snRNA
ENSG00000259022.2	-1.30644	-0.483401	10.377	0.0117512	DNAJC8P1	processed_pseudogene
ENSG00000168348.4	-3.11739	0.0974037	20.583	0.00184806	INSM2	protein_coding
ENSG00000174373.16	1.33839	6.47124	11.4942	0.00932415	RALGAPA1	protein_coding
ENSG00000198807.12	-1.62974	-0.687917	6.86618	0.0303173	PAX9	protein_coding
ENSG00000258700.5	2.85425	-1.31714	7.55244	0.0248402	LINC00871	lincRNA
ENSG00000278771.1	2.05643	1.78656	6.67932	0.0320672	RN7SL3	misc_RNA
ENSG00000274012.1	1.99882	6.32063	5.57292	0.0455352	RN7SL2	misc_RNA
ENSG00000131981.16	1.02668	6.58104	23.7519	0.0011692	LGALS3	protein_coding
ENSG00000258592.1	-1.15347	-0.239339	6.74654	0.0313597	AL391152.1	lincRNA
ENSG00000261120.1	-2.53915	-0.92339	20.2175	0.00186956	AL133299.1	antisense
ENSG00000139974.15	1.12957	3.27786	25.1576	0.000945521	SLC38A6	protein_coding
ENSG00000232774.7	-1.85508	2.08687	19.0117	0.00234208	AL355916.1	lincRNA
ENSG00000139988.9	1.87691	-0.266512	12.9654	0.00683284	RDH12	protein_coding
ENSG00000198732.10	1.0115	3.30447	8.94159	0.0170869	SMOC1	protein_coding
ENSG00000133985.3	1.39226	2.04252	10.9715	0.0104777	TTC9	protein_coding
ENSG00000258813.2	-1.65218	-1.33447	5.96503	0.0400613	AL442663.3	antisense
ENSG00000251393.3	2.43187	-1.00022	16.4478	0.00353391	AC005280.1	processed_transcript
ENSG00000187097.12	1.27967	6.2316	14.9883	0.00462096	ENTPD5	protein_coding
ENSG00000119630.14	-1.65857	6.48496	22.0587	0.00149737	PGF	protein_coding
ENSG00000259319.1	-1.17431	-0.0143346	6.21329	0.0370231	AF111167.2	antisense
ENSG00000156127.6	1.49348	1.97131	24.0372	0.00112617	BATF	protein_coding
ENSG00000266553.2	-1.12594	0.227258	8.72229	0.0178292	RN7SL356P	misc_RNA
ENSG00000177108.5	-1.69078	0.104997	6.49778	0.0338915	ZDHHC22	protein_coding
ENSG00000100593.18	1.97695	4.83392	32.1818	0.000448293	ISM2	protein_coding
ENSG00000185070.11	-1.18317	6.33538	11.3235	0.00968263	FLRT2	protein_coding
ENSG00000258867.5	1.96363	3.94791	11.1492	0.0100664	LINC01146	lincRNA
ENSG00000100433.15	-1.88897	0.387698	5.5018	0.0466278	KCNK10	protein_coding
ENSG00000165929.13	-1.45915	-0.873273	8.29806	0.0198782	TC2N	protein_coding
ENSG00000140090.17	-1.17082	0.358107	6.52962	0.0335623	SLC24A4	protein_coding
ENSG00000175785.13	-1.78742	1.5085	17.9922	0.00275279	PRIMA1	protein_coding
ENSG00000140093.10	1.11187	4.11999	9.29455	0.015623	SERPINA10	protein_coding
ENSG00000186910.4	2.47642	6.12356	6.82895	0.0306562	SERPINA11	protein_coding
ENSG00000165953.9	2.21023	1.69693	11.2679	0.0098031	SERPINA12	protein_coding
ENSG00000036530.8	-1.64602	-1.3357	8.1974	0.0204289	CYP46A1	protein_coding
ENSG00000258982.1	-1.59542	-0.674344	13.7787	0.00564108	AL133523.1	antisense
ENSG00000183092.16	-1.94824	-0.472397	12.9431	0.0068639	BEGAIN	protein_coding
ENSG00000258460.1	1.58537	0.132972	15.1844	0.00440272	AL355096.1	lincRNA
ENSG00000258919.1	1.63223	-1.22206	9.34269	0.015131	AL049836.1	lincRNA
ENSG00000259088.1	1.9929	-1.1426	10.7035	0.0110655	AL137779.2	antisense
ENSG00000166165.13	-1.17659	6.55695	30.0584	0.000554992	CKB	protein_coding
ENSG00000185567.7	-2.83534	4.75037	12.6111	0.00734771	AHNAK2	protein_coding
ENSG00000184916.9	-1.77522	1.95942	6.02495	0.0392998	JAG2	protein_coding
ENSG00000213145.9	-1.21661	-0.54401	5.56525	0.0456515	CRIP1	protein_coding
ENSG00000259098.1	-1.34069	-1.13145	5.29448	0.0498015	AC025884.2	processed_pseudogene
ENSG00000276141.4	1.47208	2.04552	6.14529	0.0378254	WHAMMP3	transcribed_unprocessed_pseudogene
ENSG00000207442.1	2.31115	-1.64561	8.80161	0.017715	SNORD116-6	snoRNA
ENSG00000248334.6	1.65712	1.07529	6.34206	0.0355622	WHAMMP2	transcribed_unprocessed_pseudogene
ENSG00000262728.5	1.70643	-1.5981	6.30969	0.0354804	AC123768.3	antisense
ENSG00000166923.11	-2.59549	-1.58025	6.47144	0.034167	GREM1	protein_coding
ENSG00000259287.2	1.12815	-1.10824	5.91521	0.0402282	AC010809.1	antisense
ENSG00000140323.6	-1.40684	1.56147	7.99975	0.0219325	DISP2	protein_coding
ENSG00000137877.10	-1.61296	1.46752	7.0372	0.0288202	SPTBN5	protein_coding
ENSG00000137842.7	1.48574	3.83483	8.76404	0.0178885	TMEM62	protein_coding
ENSG00000242028.6	-1.16255	0.893108	6.365	0.0353095	HYPK	protein_coding
ENSG00000140274.13	-2.05434	0.897844	13.4855	0.00615609	DUOXA2	protein_coding
ENSG00000171766.16	2.86486	2.6195	8.31904	0.0201159	GATM	protein_coding
ENSG00000137767.14	1.50692	3.93914	55.5866	6.20289e-05	SQOR	protein_coding
ENSG00000166147.13	-1.89756	4.87313	15.631	0.00411224	FBN1	protein_coding
ENSG00000140284.11	1.17016	4.2325	14.0667	0.0054961	SLC27A2	protein_coding
ENSG00000273674.4	1.41659	-1.3514	7.3387	0.0260017	AC021752.1	lincRNA
ENSG00000140280.14	-1.08133	1.74784	6.25648	0.0365248	LYSMD2	protein_coding
ENSG00000274528.1	1.46548	-0.836318	10.9846	0.0102022	AC090970.2	sense_intronic
ENSG00000069943.10	1.24164	2.62702	13.8244	0.0057599	PIGB	protein_coding
ENSG00000171016.12	-1.18371	2.7388	23.106	0.00123791	PYGO1	protein_coding
ENSG00000285805.1	-2.64958	-1.89337	10.6014	0.0111469	AC012378.2	antisense
ENSG00000166035.11	1.4551	5.12995	33.212	0.000403733	LIPC	protein_coding
ENSG00000140297.13	1.14808	4.21798	19.8412	0.00206315	GCNT3	protein_coding
ENSG00000182718.16	1.56429	7.03604	7.08698	0.0284021	ANXA2	protein_coding
ENSG00000234438.4	-2.6437	-1.89529	10.1383	0.0124394	KBTBD13	protein_coding
ENSG00000174485.15	1.00818	6.1618	8.33337	0.0200389	DENND4A	protein_coding
ENSG00000157890.17	-1.11316	-0.543393	5.31389	0.0496359	MEGF11	protein_coding
ENSG00000129028.9	-1.36348	2.17582	21.4037	0.00161389	THAP10	protein_coding
ENSG00000187720.14	-1.10622	0.481933	7.70103	0.0238232	THSD4	protein_coding
ENSG00000175318.12	-1.71977	-0.174794	5.4878	0.0468468	GRAMD2A	protein_coding
ENSG00000137817.17	-1.68365	0.529809	12.5268	0.00747734	PARP6	protein_coding
ENSG00000260729.1	-1.29698	0.299611	9.41097	0.015175	AC009690.1	protein_coding
ENSG00000260339.1	-2.09535	-1.04143	10.7526	0.0110137	HEXA-AS1	antisense
ENSG00000138622.4	-1.96215	1.03625	11.9511	0.00844376	HCN4	protein_coding
ENSG00000205363.5	-2.63614	-1.06906	8.24394	0.0205256	INSYN1	protein_coding
ENSG00000261801.5	-1.49246	0.117332	5.90772	0.0408071	LOXL1-AS1	antisense
ENSG00000129038.16	-1.87327	3.68652	6.85572	0.030412	LOXL1	protein_coding
ENSG00000178718.6	-1.39584	0.561279	8.00484	0.021902	RPP25	protein_coding
ENSG00000169783.12	-2.28235	0.533161	8.51601	0.0190893	LINGO1	protein_coding
ENSG00000136425.13	-1.56187	1.97574	21.8251	0.00154696	CIB2	protein_coding
ENSG00000140403.12	-1.3766	0.123935	9.91248	0.01342	DNAJA4	protein_coding
ENSG00000169684.13	-1.50524	1.47664	13.3147	0.00636858	CHRNA5	protein_coding
ENSG00000136378.15	-1.3446	6.74917	7.00942	0.0290569	ADAMTS7	protein_coding
ENSG00000235711.4	-3.03039	-2.1546	7.79657	0.0231969	ANKRD34C	protein_coding
ENSG00000103888.17	2.23507	6.42318	22.4392	0.00142076	CEMIP	protein_coding
ENSG00000172345.14	-1.16171	1.41392	8.4404	0.0194754	STARD5	protein_coding
ENSG00000274376.4	-2.07258	-1.25431	7.89361	0.0225818	ADAMTS7P1	transcribed_unprocessed_pseudogene
ENSG00000103723.13	-2.73571	-0.997134	23.3539	0.0011971	AP3B2	protein_coding
ENSG00000166503.9	-1.67857	0.991827	17.895	0.00279647	HDGFL3	protein_coding
ENSG00000259726.1	-2.10849	-1.59151	6.12406	0.0380804	CSPG4P11	unprocessed_pseudogene
ENSG00000259728.5	2.6373	-2.01999	8.98161	0.0166743	LINC00933	transcribed_unprocessed_pseudogene
ENSG00000197696.10	-1.00096	5.62019	21.5198	0.0016149	NMB	protein_coding
ENSG00000140511.11	-2.44697	-0.316344	15.143	0.00449165	HAPLN3	protein_coding
ENSG00000140545.15	-1.40387	6.06995	5.95937	0.0401342	MFGE8	protein_coding
ENSG00000166825.14	1.06377	7.16838	15.2885	0.00437406	ANPEP	protein_coding
ENSG00000185518.11	-1.32959	-0.702546	5.4836	0.0469128	SV2B	protein_coding
ENSG00000176463.14	-1.93229	-1.04813	5.55799	0.0457618	SLCO3A1	protein_coding
ENSG00000258527.1	1.70575	-0.980542	8.14946	0.0210561	ASB9P1	processed_pseudogene
ENSG00000257060.6	2.37415	-0.138006	11.4998	0.0093127	AC091078.1	lincRNA
ENSG00000140563.15	2.56563	0.879635	19.8671	0.00205514	MCTP2	protein_coding
ENSG00000182253.14	-1.19341	5.39732	11.1191	0.0101347	SYNM	protein_coding
ENSG00000140470.14	-1.45408	1.1914	7.97655	0.0220724	ADAMTS17	protein_coding
ENSG00000184254.17	-1.726	2.32358	7.98342	0.0220309	ALDH1A3	protein_coding
ENSG00000279970.1	1.54825	0.160617	14.1759	0.0053518	AC023024.2	TEC
ENSG00000282793.1	1.28329	0.108683	6.19978	0.0371808	AC090164.4	lincRNA
ENSG00000185615.15	1.87819	0.786328	16.4978	0.00353214	PDIA2	protein_coding
ENSG00000127578.7	-1.47054	1.70844	5.65263	0.0443488	WFIKKN1	protein_coding
ENSG00000127585.12	1.03131	1.10971	11.5099	0.00906406	FBXL16	protein_coding
ENSG00000102854.16	1.12204	3.48305	17.6422	0.00291425	MSLN	protein_coding
ENSG00000116176.6	3.89496	-0.0758632	21.4341	0.00163465	TPSG1	protein_coding
ENSG00000260051.1	-1.02041	0.802249	8.00488	0.0217964	AL031600.1	antisense
ENSG00000162040.6	-2.24984	-0.830239	5.41511	0.0480053	HS3ST6	protein_coding
ENSG00000183971.8	-1.51281	0.915597	11.7851	0.00875102	NPW	protein_coding
ENSG00000065057.8	1.10896	2.88653	16.4629	0.00355346	NTHL1	protein_coding
ENSG00000260778.5	-1.34947	1.12604	11.4148	0.00948883	AC009065.4	lincRNA
ENSG00000162068.1	-1.5522	0.943063	5.62894	0.0446973	NTN3	protein_coding
ENSG00000260293.2	-1.1759	1.26044	7.38093	0.0260832	AC106820.4	sense_intronic
ENSG00000276791.1	-1.1767	1.44603	7.48724	0.0253038	AC092117.1	lincRNA
ENSG00000162078.11	1.01401	2.87298	10.7328	0.0110639	ZG16B	protein_coding
ENSG00000172460.16	-1.72584	1.34306	12.102	0.008176	PRSS30P	transcribed_unitary_pseudogene
ENSG00000131650.14	-1.89843	3.83282	13.3548	0.0063179	KREMEN2	protein_coding
ENSG00000274367.1	-1.85326	-0.181475	17.0146	0.0031966	AC004233.4	lincRNA
ENSG00000272079.2	-1.02251	1.63809	6.63119	0.0325385	AC004233.3	lincRNA
ENSG00000184697.7	-1.71427	6.01437	41.028	0.000197205	CLDN6	protein_coding
ENSG00000262370.5	1.44666	0.238725	11.0896	0.0102022	AC108134.3	lincRNA
ENSG00000130182.8	-2.52011	-0.141268	26.3393	0.000859952	ZSCAN10	protein_coding
ENSG00000126603.8	-1.03865	3.18253	8.89766	0.0172809	GLIS2	protein_coding
ENSG00000168140.5	-1.42651	5.36316	25.1313	0.000998036	VASN	protein_coding
ENSG00000277170.1	1.49741	-1.18663	6.6398	0.0321672	AC012676.3	sense_intronic
ENSG00000278434.1	-1.48832	-0.687731	5.57891	0.0454446	AC023830.3	sense_intronic
ENSG00000213853.10	1.81643	4.2557	13.6215	0.00599304	EMP2	protein_coding
ENSG00000103489.11	-2.34543	-0.280701	10.7137	0.0111126	XYLT1	protein_coding
ENSG00000260342.2	-2.14487	-1.58229	8.66321	0.0181463	AC138811.2	protein_coding
ENSG00000103528.17	-1.09332	1.3328	10.8737	0.0106312	SYT17	protein_coding
ENSG00000103534.17	1.68435	-0.483109	6.8376	0.0305769	TMC5	protein_coding
ENSG00000183549.10	1.20515	1.88242	8.25857	0.020445	ACSM5	protein_coding
ENSG00000183747.12	2.3833	0.148959	10.204	0.0125164	ACSM2A	protein_coding
ENSG00000066813.14	2.32534	1.62655	10.5313	0.0115912	ACSM2B	protein_coding
ENSG00000260762.1	-2.8217	-1.79532	7.42276	0.025773	ACSM5P1	unprocessed_pseudogene
ENSG00000175311.7	1.7818	3.96743	32.6256	0.000428383	ANKS4B	protein_coding
ENSG00000265462.1	-1.84291	-1.75492	6.69879	0.0314443	MIR3680-1	miRNA
ENSG00000257838.5	-1.16409	4.77025	8.93381	0.017121	OTOAP1	transcribed_unprocessed_pseudogene
ENSG00000261266.2	-3.31195	-1.9978	6.91433	0.029886	AC008870.3	antisense
ENSG00000158865.12	2.82368	1.3483	34.0013	0.000373286	SLC5A11	protein_coding
ENSG00000182601.7	-2.42887	-1.01142	7.96729	0.0221286	HS3ST4	protein_coding
ENSG00000103522.16	-1.52638	-0.441744	5.73293	0.0431932	IL21R	protein_coding
ENSG00000250982.2	-3.25285	-2.04299	8.76446	0.0178865	GAPDHP35	processed_pseudogene
ENSG00000188322.5	-1.34211	3.71265	5.46508	0.0472051	SBK1	protein_coding
ENSG00000198156.10	-1.14697	-0.581086	6.39196	0.0345633	NPIPB6	protein_coding
ENSG00000184730.11	-1.39462	1.20975	6.24482	0.0366585	APOBR	protein_coding
ENSG00000275441.1	-2.01362	-0.97297	12.2682	0.0078105	AC020765.2	antisense
ENSG00000197471.12	-1.83991	3.97211	18.1019	0.00270447	SPN	protein_coding
ENSG00000197162.9	-1.29316	-0.0933104	9.51084	0.014671	ZNF785	protein_coding
ENSG00000279196.1	-1.35731	-0.826979	7.00185	0.0288488	AC135048.4	TEC
ENSG00000156886.11	2.83608	-1.91594	10.6899	0.0110108	ITGAD	protein_coding
ENSG00000260628.5	-1.66869	0.411238	9.08168	0.0164861	AC142381.3	transcribed_unprocessed_pseudogene
ENSG00000261727.2	-3.03702	-2.15683	8.53472	0.0188592	AC142381.4	transcribed_processed_pseudogene
ENSG00000259882.2	-1.76484	-0.787289	9.58785	0.0145248	AC142384.1	unprocessed_pseudogene
ENSG00000261580.1	-1.53599	0.424474	14.1638	0.00539455	ENPP7P13	processed_pseudogene
ENSG00000260308.1	-2.82079	-1.8039	8.32109	0.0201049	AC136428.2	processed_pseudogene
ENSG00000260781.1	-2.14772	-0.757252	10.7203	0.0110957	ARHGAP23P1	transcribed_unprocessed_pseudogene
ENSG00000261173.1	-1.09457	-0.547569	5.37479	0.048465	AC018845.3	antisense
ENSG00000102893.16	1.2692	6.82921	21.33	0.00165904	PHKB	protein_coding
ENSG00000102935.11	-1.21276	3.02792	9.04252	0.0166513	ZNF423	protein_coding
ENSG00000275155.1	-2.80403	-1.80544	8.86775	0.0174146	AC027348.1	sense_intronic
ENSG00000260249.2	-2.23002	-0.989764	5.3074	0.0497896	AC007608.3	antisense
ENSG00000260963.1	2.39628	0.315707	10.3641	0.0120527	AC026462.3	lincRNA
ENSG00000087245.13	-2.02866	4.57566	41.1912	0.000194524	MMP2	protein_coding
ENSG00000103546.18	-2.56293	1.79105	34.4262	0.000358079	SLC6A2	protein_coding
ENSG00000278928.1	-2.71249	-0.628801	24.2332	0.00110543	AC136621.1	TEC
ENSG00000228695.10	-1.94931	4.57046	29.8132	0.000576508	CES1P1	transcribed_unprocessed_pseudogene
ENSG00000198848.12	-2.17229	9.20305	42.4833	0.00017483	CES1	protein_coding
ENSG00000125148.7	1.37469	7.36472	40.9459	0.000184655	MT2A	protein_coding
ENSG00000169715.14	1.33442	4.05264	11.6485	0.00901456	MT1E	protein_coding
ENSG00000187193.9	1.57012	1.1348	6.59818	0.0328669	MT1X	protein_coding
ENSG00000087237.12	1.28313	1.82497	10.0542	0.012971	CETP	protein_coding
ENSG00000140853.15	2.7092	3.46328	25.5666	0.000945286	NLRC5	protein_coding
ENSG00000260828.1	2.50119	-1.77339	9.1472	0.0161837	HMGB3P32	processed_pseudogene
ENSG00000159625.14	1.52428	-0.446619	7.07179	0.0285289	DRC7	protein_coding
ENSG00000103034.14	1.10836	5.27795	6.25441	0.0365485	NDRG4	protein_coding
ENSG00000261807.2	-2.6471	-1.8901	7.13203	0.0280303	LINC02141	lincRNA
ENSG00000150394.14	-3.36572	-1.9861	9.14754	0.0162128	CDH8	protein_coding
ENSG00000246898.1	1.79033	1.69927	8.46979	0.0193242	LINC00920	lincRNA
ENSG00000166589.13	1.96786	0.212169	21.134	0.0017062	CDH16	protein_coding
ENSG00000176387.7	-2.60946	3.26075	22.1314	0.00148233	HSD11B2	protein_coding
ENSG00000261469.1	-1.26839	0.370899	9.5461	0.0146751	AC020978.4	sense_intronic
ENSG00000103056.12	-1.37781	2.19458	14.8004	0.00478434	SMPD3	protein_coding
ENSG00000279693.1	-5.27898	-2.04618	17.6922	0.00527123	AC099521.2	TEC
ENSG00000274698.1	-3.26595	-2.04318	11.0577	0.0100971	AC099521.1	lincRNA
ENSG00000062038.14	-2.19429	1.85343	11.4848	0.00934362	CDH3	protein_coding
ENSG00000260290.2	-1.30284	-0.874118	7.19967	0.0270765	AC092115.1	processed_pseudogene
ENSG00000157335.20	-1.37538	0.451572	5.63575	0.0445967	CLEC18C	protein_coding
ENSG00000261556.9	-1.04873	0.717091	7.15534	0.0278403	SMG1P7	transcribed_unprocessed_pseudogene
ENSG00000198650.11	2.20455	1.52472	14.1473	0.00541166	TAT	protein_coding
ENSG00000257017.8	2.70065	3.92123	10.6786	0.0112027	HP	protein_coding
ENSG00000261701.7	3.12029	1.19747	10.0752	0.0129059	HPR	protein_coding
ENSG00000261079.1	-2.37259	-1.7166	7.36825	0.0261782	AC009053.2	lincRNA
ENSG00000261170.1	-1.53601	-0.559682	13.2261	0.00629995	AC009053.3	antisense
ENSG00000168404.13	1.50883	0.972414	16.0479	0.00381946	MLKL	protein_coding
ENSG00000168925.11	-2.16875	-1.16484	9.55339	0.0146487	CTRB1	protein_coding
ENSG00000178573.7	-1.76368	2.55312	8.61977	0.018575	MAF	protein_coding
ENSG00000260876.5	-2.36348	-2.03659	6.14762	0.0377975	LINC01229	lincRNA
ENSG00000166446.15	-1.25794	-0.268879	6.96229	0.0294642	CDYL2	protein_coding
ENSG00000166473.17	1.17364	2.46245	23.0009	0.00125572	PKD1L2	polymorphic_pseudogene
ENSG00000103196.12	-1.49033	1.57104	5.29572	0.0499882	CRISPLD2	protein_coding
ENSG00000153789.13	-2.5025	-1.3901	5.95536	0.0401858	FAM92B	protein_coding
ENSG00000154102.11	-2.40517	-0.719827	8.49136	0.0192141	C16orf74	protein_coding
ENSG00000269901.1	1.11729	0.724708	13.0871	0.00648065	AC010531.5	antisense
ENSG00000261273.1	1.42489	-0.713708	5.5839	0.0453694	AC138512.1	lincRNA
ENSG00000185669.6	-1.14325	2.67571	5.71446	0.0434556	SNAI3	protein_coding
ENSG00000015413.9	1.26031	4.23143	21.2607	0.00167551	DPEP1	protein_coding
ENSG00000272636.4	-2.40928	-0.334216	9.89906	0.0134635	DOC2B	protein_coding
ENSG00000273172.1	-5.36609	-1.99558	18.7833	0.00456384	LINC02091	lincRNA
ENSG00000262294.1	1.44665	-0.496397	8.03189	0.0217406	AC129507.2	antisense
ENSG00000262558.1	1.25746	-0.720812	5.9675	0.0400295	AC129507.3	antisense
ENSG00000183688.4	-1.62801	2.72476	22.1986	0.00146861	RFLNB	protein_coding
ENSG00000231784.8	-1.25788	-0.867061	5.4231	0.047797	DBIL5P	transcribed_unitary_pseudogene
ENSG00000185924.7	-2.13991	0.710568	7.03703	0.0288217	RTN4RL1	protein_coding
ENSG00000177374.13	-1.31405	2.27485	14.8208	0.00476624	HIC1	protein_coding
ENSG00000240898.1	-1.20604	-0.558864	6.06031	0.0388592	AC132942.1	processed_pseudogene
ENSG00000108405.4	-1.42883	-0.607023	6.61933	0.032656	P2RX1	protein_coding
ENSG00000182557.8	-1.4951	0.119678	7.70759	0.0237795	SPNS3	protein_coding
ENSG00000188176.12	-1.49571	3.47371	6.99362	0.0291927	SMTNL2	protein_coding
ENSG00000142484.7	1.93006	6.12492	19.6193	0.00213352	TM4SF5	protein_coding
ENSG00000182853.12	2.03836	0.171672	23.9273	0.00114662	VMO1	protein_coding
ENSG00000091592.16	1.35792	4.28796	16.101	0.00378409	NLRP1	protein_coding
ENSG00000282936.1	-1.34717	3.40666	21.3738	0.00164872	AC004706.3	TEC
ENSG00000141505.12	1.30502	7.38987	14.3959	0.00516145	ASGR1	protein_coding
ENSG00000169992.10	-1.03116	4.11316	8.93963	0.0170955	NLGN2	protein_coding
ENSG00000178977.3	-1.0023	3.92691	6.47884	0.0340893	LINC00324	lincRNA
ENSG00000141506.13	-3.43015	-1.9447	11.55	0.00917992	PIK3R5	protein_coding
ENSG00000065320.9	-1.5788	6.22679	5.89722	0.0409456	NTN1	protein_coding
ENSG00000007237.18	-1.41967	-0.236638	5.29613	0.0499812	GAS7	protein_coding
ENSG00000125414.19	-2.96431	-1.71534	13.2201	0.00631449	MYH2	protein_coding
ENSG00000187824.8	1.21809	-0.0666134	8.3318	0.019966	TMEM220	protein_coding
ENSG00000259024.6	1.85833	-1.51725	7.25785	0.0268659	TVP23C-CDRT4	protein_coding
ENSG00000141040.15	-2.3029	-1.75161	11.8326	0.00844311	ZNF287	protein_coding
ENSG00000128438.10	-3.03762	-2.15667	6.46893	0.0341934	TBC1D27P	transcribed_unprocessed_pseudogene
ENSG00000205309.14	-1.22663	-0.672759	9.047	0.0163151	NT5M	protein_coding
ENSG00000168961.17	-1.37691	-0.0568305	5.55992	0.0457324	LGALS9	protein_coding
ENSG00000007171.17	2.46022	-0.567471	17.6117	0.00292891	NOS2	protein_coding
ENSG00000167525.13	-1.20778	0.892353	12.307	0.00767601	PROCA1	protein_coding
ENSG00000160606.11	-1.16409	5.35279	14.4416	0.00511695	TLCD1	protein_coding
ENSG00000267729.1	-2.48034	-1.38352	5.84432	0.0416527	AC010761.7	antisense
ENSG00000168792.5	-1.24535	3.89451	9.61586	0.0144251	ABHD15	protein_coding
ENSG00000198720.13	-1.71299	3.4508	10.6118	0.0113767	ANKRD13B	protein_coding
ENSG00000108576.10	2.36548	2.41384	42.7749	0.000170734	SLC6A4	protein_coding
ENSG00000184060.11	1.11475	1.4296	7.96898	0.0221183	ADAP2	protein_coding
ENSG00000264107.1	-1.10099	-0.530602	7.4691	0.025042	AC138207.2	antisense
ENSG00000141314.13	-1.48701	-1.27997	6.34165	0.0351114	RHBDL3	protein_coding
ENSG00000092871.16	1.01152	4.04074	21.128	0.00165672	RFFL	protein_coding
ENSG00000166750.10	-1.56546	2.89451	25.061	0.0010069	SLFN5	protein_coding
ENSG00000172123.12	-2.66271	-1.89312	6.2402	0.0367116	SLFN12	protein_coding
ENSG00000267312.1	1.86	-1.68416	6.86135	0.0299428	AC015911.4	processed_pseudogene
ENSG00000271447.6	-1.8315	-1.75489	6.55233	0.0328868	MMP28	protein_coding
ENSG00000275152.5	3.49479	1.2275	38.3903	0.000247674	CCL16	protein_coding
ENSG00000275431.1	1.25715	0.482513	10.1186	0.012773	AC244100.2	antisense
ENSG00000275718.2	1.47844	2.03992	27.09	0.000744878	CCL15	protein_coding
ENSG00000275944.1	1.34728	2.51228	30.254	0.000518222	AC244100.3	antisense
ENSG00000278690.1	1.72717	0.332716	15.5077	0.00420419	AC244100.4	lincRNA
ENSG00000274736.5	1.86632	1.0511	20.5527	0.00185628	CCL23	protein_coding
ENSG00000274620.1	1.76035	-1.92151	6.77847	0.030693	MIR378J	miRNA
ENSG00000277399.4	-1.51707	-0.501092	5.45214	0.0474107	GPR179	protein_coding
ENSG00000273604.1	1.0816	5.16811	16.6015	0.00346977	EPOP	protein_coding
ENSG00000161381.14	-1.45259	-0.342062	6.11609	0.0381766	PLXDC1	protein_coding
ENSG00000273576.1	-1.21484	-0.131175	10.3917	0.0117103	AC009283.1	lincRNA
ENSG00000141738.14	1.35903	5.84246	60.4168	4.57439e-05	GRB7	protein_coding
ENSG00000264968.1	1.60988	-1.64457	5.53839	0.0455587	AC090844.2	lincRNA
ENSG00000265799.1	-1.16649	1.0677	7.56781	0.0247325	AC090844.3	lincRNA
ENSG00000279199.1	-1.38274	-0.822305	7.03609	0.0286633	AC068669.1	TEC
ENSG00000279806.1	1.23612	2.48494	9.47528	0.0149345	AC018629.1	TEC
ENSG00000131746.13	1.09469	6.64025	8.67491	0.0183088	TNS4	protein_coding
ENSG00000266088.5	1.57667	-0.679945	9.25549	0.0157771	AC004585.1	lincRNA
ENSG00000196859.7	1.96389	-1.05092	6.02025	0.0393589	KRT39	protein_coding
ENSG00000184502.4	-1.77815	2.76838	7.81472	0.0230803	GAST	protein_coding
ENSG00000173805.15	-1.46671	4.08534	9.43705	0.0150769	HAP1	protein_coding
ENSG00000089558.9	-1.75634	1.80853	9.78366	0.0138453	KCNH4	protein_coding
ENSG00000184451.5	1.50776	-1.42218	6.00852	0.039032	CCR10	protein_coding
ENSG00000126562.17	1.80446	3.32652	76.2001	1.93148e-05	WNK4	protein_coding
ENSG00000131482.9	2.81838	1.05292	13.2531	0.00644759	G6PC	protein_coding
ENSG00000184988.8	1.60548	3.59137	61.9639	4.16831e-05	TMEM106A	protein_coding
ENSG00000279602.1	-1.1822	3.10161	11.9674	0.00841434	AC109326.1	TEC
ENSG00000260793.2	-1.39904	0.302172	13.8152	0.00560073	AC003102.1	antisense
ENSG00000005961.18	-1.1413	2.481	5.60667	0.0450281	ITGA2B	protein_coding
ENSG00000073670.14	-1.69406	1.67232	16.9671	0.00326063	ADAM11	protein_coding
ENSG00000131095.13	-1.40126	-0.171632	8.01571	0.0218369	GFAP	protein_coding
ENSG00000131094.4	-2.33079	-0.00877471	26.6316	0.000822089	C1QL1	protein_coding
ENSG00000236234.1	-2.71711	-1.21958	11.9722	0.00840558	AC091132.2	antisense
ENSG00000108379.10	-1.30247	4.04558	30.1903	0.000553288	WNT3	protein_coding
ENSG00000158955.11	-1.37563	-0.653405	6.1071	0.0382856	WNT9B	protein_coding
ENSG00000189120.5	-1.21094	2.67417	6.99254	0.029202	SP6	protein_coding
ENSG00000167080.8	-1.08193	1.11644	7.31484	0.0265831	B4GALNT2	protein_coding
ENSG00000108813.11	-1.44998	1.45196	7.9144	0.0224528	DLX4	protein_coding
ENSG00000006283.18	-2.04129	1.30569	5.83466	0.0417836	CACNA1G	protein_coding
ENSG00000247011.2	1.17248	-0.41622	7.14202	0.0276464	AC005920.1	lincRNA
ENSG00000011052.21	-1.22162	0.240464	8.71866	0.0181009	NME1-NME2	protein_coding
ENSG00000279207.1	-1.18836	1.8621	13.6297	0.00598343	AC015813.6	TEC
ENSG00000108387.14	-1.11477	1.69818	5.94397	0.0403332	SEPT4	protein_coding
ENSG00000011028.14	-1.96391	3.49119	8.27456	0.0203573	AC080038.1	protein_coding
ENSG00000159640.16	-3.22609	-1.56008	11.577	0.00915633	ACE	protein_coding
ENSG00000279369.1	-1.89859	-0.681056	14.0527	0.00540309	AC046185.3	TEC
ENSG00000136487.18	-2.27664	2.17818	13.334	0.00634419	GH2	protein_coding
ENSG00000239823.2	2.26486	-1.27291	13.8549	0.00555711	RF00019	misc_RNA
ENSG00000264057.1	-2.14307	-1.60063	5.83474	0.0417825	AC103810.1	transcribed_unprocessed_pseudogene
ENSG00000108370.17	-1.91467	0.908109	15.1341	0.00449892	RGS9	protein_coding
ENSG00000141337.12	1.04292	4.03605	24.2706	0.00106003	ARSG	protein_coding
ENSG00000108932.12	2.37396	6.20547	8.43557	0.0195004	SLC16A6	protein_coding
ENSG00000070540.13	1.09742	5.10071	12.0987	0.00818182	WIPI1	protein_coding
ENSG00000207561.1	1.04848	0.999667	13.6071	0.00583605	MIR635	miRNA
ENSG00000108950.12	1.91387	1.34065	33.6784	0.0003683	FAM20A	protein_coding
ENSG00000141219.15	-1.26293	7.29875	19.4662	0.00218382	C17orf80	protein_coding
ENSG00000265010.1	-1.51319	0.107082	10.7929	0.0109126	AC087301.1	sense_intronic
ENSG00000187959.9	1.12938	-0.487622	6.25168	0.0362788	CPSF4L	protein_coding
ENSG00000069188.17	-1.36896	0.443095	8.23339	0.020584	SDK2	protein_coding
ENSG00000246731.2	-2.45481	-1.98456	7.32519	0.0263474	AC100786.1	antisense
ENSG00000172794.20	-1.20714	4.57919	11.707	0.00890044	RAB37	protein_coding
ENSG00000250506.7	1.49046	-1.42578	5.83983	0.0412287	CDK3	protein_coding
ENSG00000186919.12	-1.26605	1.43488	9.45397	0.0150137	ZACN	protein_coding
ENSG00000182687.4	-1.09041	3.43645	15.5501	0.00417231	GALR2	protein_coding
ENSG00000284526.1	-1.3701	-0.835708	5.73874	0.0431111	AC015802.6	protein_coding
ENSG00000167889.12	-1.13935	0.650328	7.30999	0.0266203	MGAT5B	protein_coding
ENSG00000263718.2	-1.56608	0.828652	19.6715	0.00205346	AC068594.1	lincRNA
ENSG00000267123.6	1.52151	1.92163	23.3834	0.00124576	SCAT1	lincRNA
ENSG00000182156.10	1.27236	-0.0314298	7.64583	0.0241947	ENPP7	protein_coding
ENSG00000262772.1	1.30968	-0.84872	8.97868	0.016605	LINC01977	lincRNA
ENSG00000171246.6	-1.98974	3.87691	7.24427	0.0271303	NPTX1	protein_coding
ENSG00000185105.5	-3.02989	-2.14943	8.27042	0.0202789	MYADML2	protein_coding
ENSG00000185269.12	1.25525	7.08509	9.89636	0.0134723	NOTUM	protein_coding
ENSG00000266445.1	-2.04857	-0.0335719	14.1708	0.00538733	NARF-AS1	antisense
ENSG00000263727.1	-1.09162	0.745527	14.0211	0.00537937	AP001178.1	sense_intronic
ENSG00000265933.5	2.68604	1.28138	25.3341	0.000973018	LINC00668	lincRNA
ENSG00000101680.15	-1.71477	3.96003	21.1245	0.00170853	LAMA1	protein_coding
ENSG00000141404.16	1.37563	1.42192	19.2708	0.00216067	GNAL	protein_coding
ENSG00000267478.1	-2.08298	0.189868	5.83979	0.041714	AP002414.3	processed_pseudogene
ENSG00000267733.5	-2.04326	-0.0955227	5.69206	0.0437767	AP005264.5	transcribed_processed_pseudogene
ENSG00000267704.1	-4.11678	-1.52879	15.0836	0.00454069	FRG2LP	processed_pseudogene
ENSG00000267324.1	-3.63387	0.744778	29.4886	0.000597479	AC006557.2	processed_pseudogene
ENSG00000175319.3	-2.40675	-1.22954	8.96871	0.0169684	NF1P5	processed_pseudogene
ENSG00000154065.17	-1.58589	0.74533	5.31033	0.0497399	ANKRD29	protein_coding
ENSG00000154040.20	-1.22336	4.92996	17.2269	0.00312158	CABYR	protein_coding
ENSG00000265750.1	-1.4363	0.848809	15.9101	0.00386172	AC090772.3	lincRNA
ENSG00000118271.10	3.2911	8.47707	52.3635	8.387e-05	TTR	protein_coding
ENSG00000285095.1	-2.25883	-2.09337	5.8526	0.0413517	AC025887.2	antisense
ENSG00000197705.9	1.94861	4.74315	41.2348	0.000193816	KLHL14	protein_coding
ENSG00000101670.12	-1.92598	2.31493	27.9589	0.000710157	LIPG	protein_coding
ENSG00000166510.14	1.56307	3.01645	6.33856	0.0356009	CCDC68	protein_coding
ENSG00000081923.13	-1.09925	4.47618	13.5094	0.00612698	ATP8B1	protein_coding
ENSG00000141682.11	-1.12063	4.91547	19.8879	0.00204872	PMAIP1	protein_coding
ENSG00000206075.14	-1.35803	1.49095	5.55328	0.0458336	SERPINB5	protein_coding
ENSG00000171451.14	-1.46289	2.7765	30.7691	0.000500604	DSEL	protein_coding
ENSG00000206052.11	1.19838	3.71536	7.69257	0.0238797	DOK6	protein_coding
ENSG00000260457.2	-2.32477	-1.28827	5.91998	0.040646	AC027458.1	lincRNA
ENSG00000206043.6	-2.15522	-1.59628	7.10043	0.0282904	C18orf63	protein_coding
ENSG00000187773.8	-1.86098	0.180321	12.5627	0.00742185	DIPK1C	protein_coding
ENSG00000264278.1	-1.3727	0.0812729	14.87	0.00457427	ZNF236-DT	lincRNA
ENSG00000099822.3	-2.0925	2.45952	9.00913	0.0167938	HCN2	protein_coding
ENSG00000267666.2	-2.44028	-1.99303	5.36362	0.0488479	AC004156.1	lincRNA
ENSG00000070404.10	-1.40414	7.16815	8.92401	0.0171642	FSTL3	protein_coding
ENSG00000129951.18	-1.59615	2.09858	5.55034	0.0458785	PLPPR3	protein_coding
ENSG00000116014.10	-1.21349	1.20112	13.1435	0.00650193	KISS1R	protein_coding
ENSG00000116032.5	-1.73502	2.55493	6.50382	0.0338287	GRIN3B	protein_coding
ENSG00000099625.13	-1.03564	2.47926	5.498	0.0466871	CBARP	protein_coding
ENSG00000176490.5	-1.65958	0.226248	21.9151	0.00145992	DIRAS1	protein_coding
ENSG00000065717.15	-2.17826	-1.34853	5.35638	0.0489679	TLE2	protein_coding
ENSG00000268670.1	-1.26679	-0.631112	7.00408	0.0288297	AC016586.1	sense_intronic
ENSG00000060566.14	2.16426	1.44945	28.3205	0.000681284	CREB3L3	protein_coding
ENSG00000089847.12	-1.41069	0.37404	9.66467	0.0142533	ANKRD24	protein_coding
ENSG00000223573.7	-1.72158	3.63884	5.8006	0.042249	TINCR	protein_coding
ENSG00000174898.16	-1.68034	0.611249	6.92039	0.0298324	CATSPERD	protein_coding
ENSG00000156413.13	1.88602	3.17744	20.6959	0.00181783	FUT6	protein_coding
ENSG00000181029.9	-1.26412	-0.35275	7.79413	0.0230781	TRAPPC5	protein_coding
ENSG00000181143.15	-1.02072	-0.366228	5.75176	0.0424378	MUC16	protein_coding
ENSG00000278611.1	1.59912	-0.472188	7.76183	0.0234222	ZNF426-DT	lincRNA
ENSG00000105088.8	-2.24744	1.56554	14.1203	0.00543973	OLFM2	protein_coding
ENSG00000267534.4	-1.39206	1.41117	8.42882	0.0195354	S1PR2	protein_coding
ENSG00000130173.13	1.53315	2.32791	25.7008	0.000929738	ANGPTL8	protein_coding
ENSG00000105518.14	1.17996	3.05876	20.9753	0.00172358	TMEM205	protein_coding
ENSG00000183401.12	1.14557	1.72657	16.3475	0.00350043	CCDC159	protein_coding
ENSG00000187266.14	-1.33687	3.96256	15.8677	0.0039427	EPOR	protein_coding
ENSG00000130176.8	-1.13866	0.226698	5.65496	0.0443148	CNN1	protein_coding
ENSG00000278897.1	1.46566	-0.686556	6.90574	0.0299624	AC020951.1	TEC
ENSG00000198342.10	-1.13725	2.0245	16.3463	0.00350117	ZNF442	protein_coding
ENSG00000267519.6	-1.0331	2.20901	10.4733	0.0117487	AC020916.1	antisense
ENSG00000132000.13	-1.81326	-0.181021	8.24452	0.0205224	PODNL1	protein_coding
ENSG00000187867.8	1.30983	0.654702	10.8516	0.0107672	PALM3	protein_coding
ENSG00000105011.9	-1.27543	5.32576	14.2284	0.00532843	ASF1B	protein_coding
ENSG00000161031.13	1.89508	-0.407468	12.4079	0.00766514	PGLYRP2	protein_coding
ENSG00000186115.13	-1.71246	5.45908	19.502	0.00217189	CYP4F2	protein_coding
ENSG00000072954.7	-1.01846	1.68263	7.54886	0.0248654	TMEM38A	protein_coding
ENSG00000268743.1	-1.66776	-0.954959	7.64819	0.0241787	AC008737.1	sense_intronic
ENSG00000269720.2	-1.7915	-0.662731	14.6808	0.00473993	CCDC194	protein_coding
ENSG00000179913.10	2.92701	3.8555	67.6496	3.32619e-05	B3GNT3	protein_coding
ENSG00000105641.4	-3.2555	0.789644	17.6308	0.00291974	SLC5A5	protein_coding
ENSG00000285188.1	-1.22686	2.38466	7.6874	0.0239142	AC008397.2	protein_coding
ENSG00000267565.1	-1.30797	-0.693351	8.78467	0.0174642	AC011477.3	antisense
ENSG00000184635.15	-1.89422	-1.51305	9.53404	0.0144219	ZNF93	protein_coding
ENSG00000197134.12	-2.16476	-0.50939	17.6954	0.002889	ZNF257	protein_coding
ENSG00000105173.14	-1.23952	4.80935	25.3763	0.000967906	CCNE1	protein_coding
ENSG00000198597.9	-2.22855	-1.80232	7.37481	0.0259926	ZNF536	protein_coding
ENSG00000124302.13	-1.90876	-0.927609	5.95274	0.0402197	CHST8	protein_coding
ENSG00000105711.12	1.86085	2.10968	19.9745	0.00202228	SCN1B	protein_coding
ENSG00000268947.1	-1.1259	-0.653972	5.63301	0.0442785	AC002128.1	sense_intronic
ENSG00000105675.8	-1.06996	-0.325731	7.81812	0.0226838	ATP4A	protein_coding
ENSG00000250799.9	2.26393	2.80738	10.1079	0.0128056	PRODH2	protein_coding
ENSG00000225975.6	1.58865	-0.00793936	10.451	0.0118099	LINC01534	lincRNA
ENSG00000267041.6	-1.56526	2.93167	12.8053	0.00705972	ZNF850	protein_coding
ENSG00000198453.13	-1.95533	-0.868827	8.90229	0.0172603	ZNF568	protein_coding
ENSG00000171804.10	-1.69491	-1.63559	5.38979	0.0482129	WDR87	protein_coding
ENSG00000188766.12	-1.11237	0.817477	7.15468	0.0278457	SPRED3	protein_coding
ENSG00000196218.12	-1.72356	0.847028	8.38292	0.0197755	RYR1	protein_coding
ENSG00000104814.13	-3.27508	-1.51798	12.1258	0.0081347	MAP4K1	protein_coding
ENSG00000267107.7	-2.05351	-0.578374	24.9308	0.000973276	PCAT19	lincRNA
ENSG00000105737.9	-3.83816	-1.13906	30.6319	0.000497271	GRIK5	protein_coding
ENSG00000234465.11	-1.58531	-0.879776	9.32	0.0152394	PINLYP	protein_coding
ENSG00000011422.12	1.94584	0.488503	24.742	0.00103281	PLAUR	protein_coding
ENSG00000159915.12	1.29918	1.03425	7.19707	0.0275043	ZNF233	protein_coding
ENSG00000273777.4	2.4431	-1.81633	8.58234	0.0187069	CEACAM20	protein_coding
ENSG00000234906.10	1.11966	0.678215	14.0901	0.00530761	APOC2	protein_coding
ENSG00000104936.17	-1.0671	4.4796	8.69091	0.0182324	DMPK	protein_coding
ENSG00000204869.8	2.51183	0.905284	30.9551	0.000509668	IGFL4	protein_coding
ENSG00000134830.5	-3.15937	-2.09784	9.75588	0.0137668	C5AR2	protein_coding
ENSG00000105419.17	-1.50274	0.38056	21.4444	0.00156121	MEIS3	protein_coding
ENSG00000118160.14	-2.00092	-1.28066	11.9695	0.00819577	SLC8A2	protein_coding
ENSG00000277383.1	-1.12192	-0.339313	7.7287	0.0232604	AC010331.1	antisense
ENSG00000105499.14	-1.10579	1.75021	15.9465	0.00375752	PLA2G4C	protein_coding
ENSG00000182324.6	1.87486	-1.34626	9.39174	0.0149452	KCNJ14	protein_coding
ENSG00000088002.11	-1.90147	-1.34607	11.0023	0.0101611	SULT2B1	protein_coding
ENSG00000286024.1	1.65295	0.689702	13.3639	0.00630641	AC026803.3	antisense
ENSG00000087076.9	-1.00516	0.695266	5.88947	0.0410482	HSD17B14	protein_coding
ENSG00000267898.1	-1.15961	-0.648194	5.44062	0.0474999	AC026803.2	lincRNA
ENSG00000225950.8	-1.64497	1.64879	7.83909	0.0229248	NTF4	protein_coding
ENSG00000268287.1	-1.8996	-0.119105	9.89304	0.0134831	AC008687.3	lincRNA
ENSG00000104848.1	-2.27083	2.04179	6.47444	0.0341355	KCNA7	protein_coding
ENSG00000177380.14	-1.4617	3.27104	17.1795	0.00314638	PPFIA3	protein_coding
ENSG00000204653.10	1.56705	-0.40247	13.4469	0.00602574	ASPDH	protein_coding
ENSG00000161681.15	-3.24129	-2.04665	9.85774	0.0135456	SHANK1	protein_coding
ENSG00000105383.15	-2.01873	-0.979756	8.02087	0.0218061	CD33	protein_coding
ENSG00000268520.1	1.10515	-0.617529	5.36303	0.0486526	AC008750.5	sense_intronic
ENSG00000142512.15	-1.47597	-0.302986	9.95943	0.0132691	SIGLEC10	protein_coding
ENSG00000283236.1	-1.10131	0.517752	10.0511	0.0127036	AC074141.1	transcribed_unprocessed_pseudogene
ENSG00000179820.16	1.03048	5.48845	6.37939	0.0351523	MYADM	protein_coding
ENSG00000237017.1	-1.06181	0.0608457	6.16924	0.0375403	AC245052.4	antisense
ENSG00000167608.11	-1.31891	1.67241	8.74008	0.0180003	TMC4	protein_coding
ENSG00000167618.10	1.41991	-0.360305	5.77116	0.0426565	LAIR2	protein_coding
ENSG00000167646.13	-1.61702	1.19202	12.4493	0.0075991	DNAAF3	protein_coding
ENSG00000187550.8	-1.60995	0.304441	7.56998	0.0247173	SBK2	protein_coding
ENSG00000231274.5	1.16241	1.3999	7.38952	0.0260191	SBK3	protein_coding
ENSG00000171487.14	-1.84164	-0.548436	6.59252	0.0329236	NLRP5	protein_coding
ENSG00000267710.9	1.66658	-0.48205	10.5696	0.0114885	EDDM13	protein_coding
ENSG00000018869.16	1.07449	0.620225	11.3196	0.00945722	ZNF582	protein_coding
ENSG00000268654.2	2.26514	0.321897	6.25195	0.0365766	MIMT1	lincRNA
ENSG00000196724.12	-2.52997	-1.6298	9.52788	0.0147413	ZNF418	protein_coding
ENSG00000268912.1	-1.54089	-1.02098	8.92571	0.0168342	AC012313.5	lincRNA
ENSG00000125898.13	-1.24542	3.89378	6.89424	0.030065	FAM110A	protein_coding
ENSG00000088881.20	-2.12563	2.94648	23.7369	0.00119372	EBF4	protein_coding
ENSG00000088836.13	1.85599	8.47974	9.3342	0.0154686	SLC4A11	protein_coding
ENSG00000171873.7	2.59885	1.7841	45.8863	0.000133683	ADRA1D	protein_coding
ENSG00000125845.7	-1.93017	-0.560434	7.90539	0.0225086	BMP2	protein_coding
ENSG00000101333.16	-1.55495	0.166986	12.1221	0.0081411	PLCB4	protein_coding
ENSG00000230990.1	-2.47335	-1.40987	9.72717	0.0140372	AL049649.1	lincRNA
ENSG00000172296.13	2.34214	3.1812	22.9196	0.0013309	SPTLC3	protein_coding
ENSG00000101230.6	-1.07563	3.02606	12.5572	0.00743037	ISM1	protein_coding
ENSG00000232838.4	1.00237	1.94764	8.69228	0.0182259	PET117	protein_coding
ENSG00000173404.5	-1.5883	0.219526	5.65314	0.0443414	INSM1	protein_coding
ENSG00000088970.16	1.23169	7.51466	9.91923	0.0133982	KIZ	protein_coding
ENSG00000232712.6	1.071	2.26062	11.1976	0.00995789	KIZ-AS1	antisense
ENSG00000230400.2	-2.98134	0.811408	38.1228	0.000253651	LINC01747	lincRNA
ENSG00000270001.1	-1.06537	0.183003	6.06909	0.0387507	AL121894.2	lincRNA
ENSG00000101441.4	-2.72833	1.30191	12.1899	0.00802486	CST4	protein_coding
ENSG00000170369.4	-3.34631	-1.99228	7.78499	0.0232717	CST2	protein_coding
ENSG00000170367.5	-3.08085	2.52134	17.1723	0.00315015	CST5	protein_coding
ENSG00000077984.6	1.49624	-1.69582	5.86232	0.0409269	CST7	protein_coding
ENSG00000277938.1	-1.322	-1.24365	5.97915	0.0394035	AL035252.3	lincRNA
ENSG00000227379.2	-3.17139	-2.09414	6.86645	0.0303149	PPIAP2	processed_pseudogene
ENSG00000278383.1	-1.8893	0.368767	26.2864	0.000821163	AL031673.1	antisense
ENSG00000230772.1	1.46225	-0.92893	6.69194	0.0319451	VN1R108P	unprocessed_pseudogene
ENSG00000175170.15	-1.4402	2.25381	6.22864	0.036845	FAM182B	lincRNA
ENSG00000125804.13	-2.61117	-0.902052	13.5329	0.00609867	FAM182A	processed_transcript
ENSG00000149599.15	-1.55857	0.834637	18.677	0.00242581	DUSP15	protein_coding
ENSG00000101331.15	-2.51431	-1.35177	6.95748	0.0295062	CCM2L	protein_coding
ENSG00000101336.14	-1.73579	-1.28368	7.49742	0.0250775	HCK	protein_coding
ENSG00000275223.1	1.16703	0.650242	10.2301	0.0123332	AL121906.2	lincRNA
ENSG00000204117.1	-1.3973	-0.254503	8.11552	0.0212509	AL162293.1	lincRNA
ENSG00000132821.12	-3.54201	-0.941717	19.5204	0.00216582	VSTM2L	protein_coding
ENSG00000198959.12	1.21992	6.55251	7.84431	0.0228917	TGM2	protein_coding
ENSG00000124143.10	1.64172	1.7485	19.1304	0.0022994	ARHGAP40	protein_coding
ENSG00000204103.4	-2.53425	5.18597	12.2756	0.00788101	MAFB	protein_coding
ENSG00000229771.2	-2.2539	-1.32076	6.16263	0.0376187	AL035665.1	lincRNA
ENSG00000226648.1	-1.92385	0.502417	29.8244	0.000543386	PLCG1-AS1	antisense
ENSG00000183798.5	-1.93465	1.28715	11.9026	0.00853207	EMILIN3	protein_coding
ENSG00000124194.16	-2.80606	-1.80485	6.70574	0.0318122	GDAP1L1	protein_coding
ENSG00000229005.2	2.09641	1.04614	5.76235	0.0427795	HNF4A-AS1	antisense
ENSG00000168734.14	1.00201	4.4188	21.1365	0.00167606	PKIG	protein_coding
ENSG00000101098.12	-1.01701	4.47256	5.54012	0.0460351	RIMS4	protein_coding
ENSG00000124102.5	3.08623	-1.42486	5.96805	0.0400224	PI3	protein_coding
ENSG00000101443.18	-2.07114	3.0447	17.3468	0.00305985	WFDC2	protein_coding
ENSG00000124116.19	-2.51817	-1.38373	6.86915	0.0302904	WFDC3	protein_coding
ENSG00000196562.14	-1.15197	9.61045	6.38439	0.0350978	SULF2	protein_coding
ENSG00000286063.1	-2.30124	-1.76124	7.25391	0.0270547	AL121888.1	lincRNA
ENSG00000124126.14	-1.15188	0.374502	6.14497	0.0378292	PREX1	protein_coding
ENSG00000230758.1	-1.27295	-0.192348	8.89142	0.0171214	SNAP23P1	processed_pseudogene
ENSG00000227431.5	-1.11355	0.169495	8.44869	0.0191099	CSE1L-AS1	antisense
ENSG00000158445.10	-1.02827	-0.249274	6.84189	0.0301111	KCNB1	protein_coding
ENSG00000124212.6	-1.51315	-1.2742	5.82904	0.0417012	PTGIS	protein_coding
ENSG00000124216.4	-1.57876	2.72932	23.9177	0.0011658	SNAI1	protein_coding
ENSG00000054793.13	1.18749	6.34789	23.3721	0.00125266	ATP9A	protein_coding
ENSG00000231703.2	-2.33555	-1.71502	5.69287	0.0437649	AL354993.1	antisense
ENSG00000087589.16	1.72082	-0.107993	9.10355	0.0163947	CASS4	protein_coding
ENSG00000101144.13	-2.19287	2.18586	9.24939	0.0158013	BMP7	protein_coding
ENSG00000283078.1	-1.05786	1.35073	7.74725	0.0235176	AL137077.2	lincRNA
ENSG00000101180.16	-2.53631	-1.93945	8.80394	0.0173765	HRH3	protein_coding
ENSG00000130701.4	2.65989	-0.210769	22.3267	0.00144288	RBBP8NL	protein_coding
ENSG00000233017.2	-3.17198	-2.09398	8.4397	0.019479	AL121832.1	antisense
ENSG00000101187.16	2.05023	3.2381	21.2597	0.00167575	SLCO4A1	protein_coding
ENSG00000203900.2	-2.87321	-1.14355	14.0554	0.00550807	AL121827.1	antisense
ENSG00000197457.10	-2.17485	5.18306	59.2321	5.39137e-05	STMN3	protein_coding
ENSG00000203896.10	-1.1402	1.35887	14.8375	0.00460219	LIME1	protein_coding
ENSG00000203883.7	-1.73824	3.58664	13.4275	0.00622728	SOX18	protein_coding
ENSG00000274276.4	-2.75493	0.935609	13.8882	0.00568885	CBSL	protein_coding
ENSG00000277067.4	1.21008	0.145172	11.6683	0.00875248	CU634019.1	lincRNA
ENSG00000278233.1	3.7406	-1.88446	5.50158	0.0466313	RNA5-8SN2	rRNA
ENSG00000230965.1	-2.60156	0.395316	9.38163	0.0152864	SNX18P13	processed_pseudogene
ENSG00000215559.8	-2.13038	3.34379	5.51043	0.0464936	ANKRD20A11P	transcribed_unprocessed_pseudogene
ENSG00000203616.2	-2.03039	0.741568	6.75297	0.0313626	RHOT1P2	processed_pseudogene
ENSG00000279390.1	-1.16194	0.172047	6.22673	0.0368671	AF127577.6	TEC
ENSG00000232560.6	3.38212	-1.25602	9.894	0.01348	LINC01549	lincRNA
ENSG00000229962.1	-3.34756	-1.99622	11.1253	0.0100381	AP000221.1	lincRNA
ENSG00000286018.1	1.16707	-0.170801	9.5298	0.0144372	AF129075.3	antisense
ENSG00000166979.13	3.5377	-0.178096	13.1562	0.00657423	EVA1C	protein_coding
ENSG00000273102.1	1.29181	-0.642137	9.16088	0.0158458	AP000569.1	lincRNA
ENSG00000286153.1	1.52811	1.60541	7.51872	0.0250786	AP000331.1	antisense
ENSG00000236830.6	-1.41445	-0.416178	5.67114	0.044079	CBR3-AS1	processed_transcript
ENSG00000182093.15	1.02001	3.42786	11.6461	0.0090193	WRB	protein_coding
ENSG00000160180.15	1.48157	0.802599	5.46529	0.0472017	TFF3	protein_coding
ENSG00000160182.3	5.19384	1.08813	9.45234	0.0150197	TFF1	protein_coding
ENSG00000160183.15	2.67591	0.626402	19.863	0.0020564	TMPRSS3	protein_coding
ENSG00000160233.8	1.03953	2.45978	13.6278	0.00594072	LRRC3	protein_coding
ENSG00000235890.2	1.16993	2.25002	23.4708	0.00117845	TSPEAR-AS1	antisense
ENSG00000142156.14	-1.65654	5.78945	13.7128	0.00588666	COL6A1	protein_coding
ENSG00000183628.13	-1.99141	0.208037	12.438	0.00761711	DGCR6	protein_coding
ENSG00000040608.14	-2.27486	-0.956848	12.3322	0.00778783	RTN4R	protein_coding
ENSG00000099937.11	1.40912	8.19803	6.09779	0.0383989	SERPIND1	protein_coding
ENSG00000099957.16	2.17201	-1.17715	7.67028	0.0240293	P2RX6	protein_coding
ENSG00000234630.1	-1.159	1.85462	7.35697	0.0262631	AC245060.2	lincRNA
ENSG00000286129.1	-1.22909	1.70886	5.58062	0.0454188	AC245060.7	processed_transcript
ENSG00000100228.12	1.27673	0.283555	8.93726	0.0171059	RAB36	protein_coding
ENSG00000218537.1	-1.25632	0.744325	7.89739	0.0225583	MIF-AS1	antisense
ENSG00000234884.1	-5.17507	-2.10211	16.7424	0.00597015	AL022329.1	antisense
ENSG00000244625.6	-2.26247	-0.962649	8.52037	0.0190673	MIATNB	lincRNA
ENSG00000169184.6	-1.99829	-0.249248	12.7927	0.00707803	MN1	protein_coding
ENSG00000214491.8	2.44309	0.732997	12.644	0.00729795	SEC14L6	protein_coding
ENSG00000185339.8	2.81354	2.96332	55.4539	6.83374e-05	TCN2	protein_coding
ENSG00000100342.20	1.49331	4.01445	6.10164	0.0383519	APOL1	protein_coding
ENSG00000100360.15	-2.40138	-0.240682	20.7257	0.00180996	IFT27	protein_coding
ENSG00000231467.2	-5.27453	-2.04755	14.6239	0.00845097	AL022314.1	antisense
ENSG00000100060.17	1.95697	2.05801	19.4535	0.00218803	MFNG	protein_coding
ENSG00000100079.7	2.07841	1.74971	17.1928	0.00313938	LGALS2	protein_coding
ENSG00000168135.4	-1.64096	0.360992	6.05727	0.0388968	KCNJ4	protein_coding
ENSG00000159958.6	-1.45389	0.390535	8.14232	0.0210968	TNFRSF13C	protein_coding
ENSG00000205704.6	-2.70813	-1.84619	8.74016	0.0179999	LINC00634	transcribed_unitary_pseudogene
ENSG00000100167.20	-1.78987	1.38925	5.6676	0.0441305	SEPT3	protein_coding
ENSG00000235568.6	-2.72476	-1.84478	10.3955	0.0117461	NFAM1	protein_coding
ENSG00000186732.14	-2.43508	-1.99469	6.44094	0.0344895	MPPED1	protein_coding
ENSG00000056487.16	-3.1149	-0.977858	19.1021	0.00230948	PHF21B	protein_coding
ENSG00000100373.10	2.16454	0.858594	21.4564	0.00162948	UPK3A	protein_coding
ENSG00000197182.14	2.18236	-1.72298	5.42949	0.0477732	MIRLET7BHG	lincRNA
ENSG00000234869.1	1.62035	-0.440248	9.72352	0.0140497	AL021392.1	antisense
ENSG00000073150.13	1.84557	2.517	9.11026	0.0163668	PANX2	protein_coding
ENSG00000185386.15	-1.64538	3.76748	10.0074	0.013117	MAPK11	protein_coding
ENSG00000008735.14	-1.41739	2.56557	10.0784	0.0128961	MAPK8IP2	protein_coding
ENSG00000124343.13	-2.48312	-1.15951	16.4227	0.00345468	XG	protein_coding
ENSG00000101825.8	-2.73442	-1.84687	10.4379	0.011636	MXRA5	protein_coding
ENSG00000011201.12	-2.36571	0.674455	16.9729	0.00325747	ANOS1	protein_coding
ENSG00000101849.16	1.00223	4.2943	25.3408	0.000923824	TBL1X	protein_coding
ENSG00000101850.13	-1.51857	1.02533	19.4273	0.00213913	GPR143	protein_coding
ENSG00000087842.11	1.67124	4.02457	34.5707	0.000353087	PIR	protein_coding
ENSG00000130234.10	5.25811	-2.12535	17.5037	0.00549473	ACE2	protein_coding
ENSG00000188158.15	-1.51116	-0.124949	6.71375	0.0317354	NHS	protein_coding
ENSG00000044446.11	1.10422	5.78833	5.80324	0.0422126	PHKA2	protein_coding
ENSG00000177189.13	1.3183	7.67068	7.17348	0.0276936	RPS6KA3	protein_coding
ENSG00000176746.6	-2.16525	0.141821	7.63102	0.0242957	MAGEB6	protein_coding
ENSG00000226781.1	1.37609	-0.296208	7.23271	0.0272213	TBCAP1	processed_pseudogene
ENSG00000156298.12	-1.16397	0.499983	6.77808	0.0311269	TSPAN7	protein_coding
ENSG00000165175.15	-1.39279	4.77878	23.7185	0.00119661	MID1IP1	protein_coding
ENSG00000238123.1	-1.6085	-0.965953	6.9429	0.0296339	MID1IP1-AS1	antisense
ENSG00000189221.9	1.39107	5.49223	15.4645	0.004237	MAOA	protein_coding
ENSG00000235636.1	1.56558	-0.331792	6.68281	0.0320334	NUS1P1	processed_pseudogene
ENSG00000267064.1	2.0879	-1.22643	6.65087	0.0323448	UXT-AS1	antisense
ENSG00000234390.4	1.55388	1.30018	22.0436	0.00146115	USP27X-AS1	lincRNA
ENSG00000171365.17	1.35762	5.8717	36.1445	0.000303934	CLCN5	protein_coding
ENSG00000154545.16	4.98762	1.07767	14.0281	0.00553706	MAGED4	protein_coding
ENSG00000227329.2	2.31502	-1.2393	5.73337	0.043187	AL139396.1	processed_pseudogene
ENSG00000221716.1	-2.0462	-1.89606	5.72544	0.0432329	SNORA11	snoRNA
ENSG00000187601.4	-1.64448	3.5764	43.5831	0.000159165	MAGEH1	protein_coding
ENSG00000131089.15	-1.49292	0.430174	8.89212	0.0173056	ARHGEF9	protein_coding
ENSG00000130054.4	-1.13535	2.76471	12.4424	0.00761012	FAM155B	protein_coding
ENSG00000120500.17	-1.06841	0.618158	12.1953	0.00780742	ARR3	protein_coding
ENSG00000184481.16	1.0607	2.72221	10.1639	0.0126362	FOXO4	protein_coding
ENSG00000242732.4	-1.65294	4.22732	7.32932	0.0264726	RTL5	protein_coding
ENSG00000186462.8	3.63472	1.46059	45.6179	0.000136456	NAP1L2	protein_coding
ENSG00000198157.10	-1.24634	0.102493	7.08668	0.0284046	HMGN5	protein_coding
ENSG00000126733.21	-1.30729	-0.876051	5.4294	0.0477746	DACH2	protein_coding
ENSG00000102271.14	1.36375	-0.976551	7.17065	0.0273078	KLHL4	protein_coding
ENSG00000102359.7	2.17399	2.68758	48.8198	0.000107517	SRPX2	protein_coding
ENSG00000102362.15	1.37928	0.418477	10.3869	0.0119883	SYTL4	protein_coding
ENSG00000133169.6	-1.01969	3.61821	9.34342	0.015433	BEX1	protein_coding
ENSG00000102409.10	-2.84215	-1.42421	6.01663	0.0394045	BEX4	protein_coding
ENSG00000123570.4	1.5029	1.47132	19.1344	0.002298	RAB9B	protein_coding
ENSG00000207146.1	-1.09572	-0.615329	6.06415	0.0383401	RF00019	misc_RNA
ENSG00000243978.8	-1.94935	-1.03272	6.53406	0.0335166	RTL9	protein_coding
ENSG00000077264.15	-1.81588	-1.25088	5.39492	0.0483335	PAK3	protein_coding
ENSG00000126016.15	-2.06479	1.74908	16.3258	0.00363869	AMOT	protein_coding
ENSG00000174460.4	-1.42936	1.17781	11.2021	0.00994788	ZCCHC12	protein_coding
ENSG00000171155.8	1.04471	4.44476	11.1441	0.010078	C1GALT1C1	protein_coding
ENSG00000171388.12	-1.63395	-0.477623	13.7574	0.00566491	APLN	protein_coding
ENSG00000122121.11	2.33067	3.00078	86.4691	1.19839e-05	XPNPEP2	protein_coding
ENSG00000147255.19	1.96618	6.94332	58.9344	5.49031e-05	IGSF1	protein_coding
ENSG00000213468.6	1.13005	1.86025	8.37892	0.0197966	FIRRE	processed_transcript
ENSG00000076716.9	-1.56637	2.96726	5.89451	0.0409815	GPC4	protein_coding
ENSG00000236091.1	2.72386	-1.97714	9.17237	0.0160041	LINC02243	lincRNA
ENSG00000196972.9	-1.61796	-0.111441	7.04272	0.0287735	SMIM10L2B	protein_coding
ENSG00000129682.16	-1.51028	-0.624336	5.43548	0.047677	FGF13	protein_coding
ENSG00000234696.1	-2.87154	-1.76489	9.01581	0.0167652	GPR50-AS1	antisense
ENSG00000102195.9	-2.06438	2.57905	5.42319	0.0478747	GPR50	protein_coding
ENSG00000269993.1	-2.20856	0.173188	8.37574	0.0198134	KC877982.1	lincRNA
ENSG00000067840.12	-1.81409	0.47511	7.92996	0.0223568	PDZD4	protein_coding
ENSG00000160211.17	-1.1728	6.80173	9.54246	0.0146883	G6PD	protein_coding
ENSG00000275882.1	1.31163	0.75962	6.44968	0.0343967	IKBKGP1	unprocessed_pseudogene
ENSG00000169093.16_PAR_Y	2.7531	1.28149	6.95036	0.0295684	ASMTL	protein_coding
ENSG00000182162.11_PAR_Y	3.28336	-2.13952	8.25743	0.0204512	P2RY8	protein_coding
ENSG00000197976.12_PAR_Y	-1.97855	1.50405	6.53475	0.0335096	AKAP17A	protein_coding
ENSG00000231535.6	1.45734	-1.11367	6.78852	0.0307132	LINC00278	lincRNA
ENSG00000012817.15	1.22881	5.38775	33.4842	0.000388346	KDM5D	protein_coding

## Sheet: 643 overlapped genes
gene	genename	log2FoldChange (sh-TP53LC04-1-ADR+ vs sh-LacZ-ADR+)	pvalue (sh-TP53LC04-1-ADR+ vs sh-LacZ-ADR+)	log2FoldChange (WT-ADR+ vs TP53-/- -ADR+)	pvalue (WT-ADR+ vsTP53-/- -ADR+)
ENSG00000175899.14	A2M	2.03816	0.00341382	-1.32923	8.05e-07
ENSG00000085563.14	ABCB1	1.42326	0.010422	-1.0507	0.000637786
ENSG00000005471.17	ABCB4	1.72736	0.00303292	-2.26863	1.33045e-10
ENSG00000244167.1	AC005532.2	2.13909	0.0273978	-2.37734	6.34387e-09
ENSG00000250770.3	AC005865.2	-1.19697	0.0409317	3.5906	1.92348e-11
ENSG00000247011.2	AC005920.1	1.17248	0.0276464	1.77714	2.20583e-05
ENSG00000267324.1	AC006557.2	-3.63387	0.000597479	4.1247	3.03136e-06
ENSG00000285188.1	AC008397.2	-1.22686	0.0239142	7.78998	1.0906e-22
ENSG00000268287.1	AC008687.3	-1.8996	0.0134831	8.55462	1.44728e-15
ENSG00000268743.1	AC008737.1	-1.66776	0.0241787	1.8866	0.00155984
ENSG00000271926.1	AC008972.1	-1.33234	0.0261815	3.26654	0.000249647
ENSG00000272081.1	AC008972.2	-1.42565	0.00209143	2.93559	8.02082e-07
ENSG00000261170.1	AC009053.3	-1.53601	0.00629995	2.50301	0.00300665
ENSG00000260778.5	AC009065.4	-1.34947	0.00948883	1.37526	0.00458005
ENSG00000279227.1	AC009303.4	1.04921	0.00857257	-1.1338	0.00127368
ENSG00000260729.1	AC009690.1	-1.29698	0.015175	1.76544	0.00267115
ENSG00000251257.2	AC010457.1	-1.408	0.010713	5.15314	6.52634e-05
ENSG00000284526.1	AC015802.6	-1.3701	0.0431111	2.973	0.000678768
ENSG00000279806.1	AC018629.1	1.23612	0.0149345	-1.75443	5.79767e-08
ENSG00000213963.6	AC019080.1	-1.15184	0.00280468	1.62551	6.24691e-07
ENSG00000275441.1	AC020765.2	-2.01362	0.0078105	-2.15418	0.00505598
ENSG00000251467.1	AC020893.2	-2.2414	0.0410268	1.81422	0.00182068
ENSG00000204876.4	AC021218.1	1.65678	0.00104681	1.08231	0.0092683
ENSG00000270002.1	AC022028.2	-1.54628	0.0403783	-3.53874	0.00172878
ENSG00000245648.1	AC022075.1	-2.53389	0.00610315	3.63133	6.14768e-24
ENSG00000255745.1	AC023796.1	1.04936	0.0143876	2.50722	1.41509e-09
ENSG00000278434.1	AC023830.3	-1.48832	0.0454446	3.28926	6.04667e-24
ENSG00000259098.1	AC025884.2	-1.34069	0.0498015	6.86516	0.00010035
ENSG00000260963.1	AC026462.3	2.39628	0.0120527	-4.18114	1.12436e-12
ENSG00000275155.1	AC027348.1	-2.80403	0.0174146	7.78302	1.69136e-06
ENSG00000260457.2	AC027458.1	-2.32477	0.040646	5.94813	0.00346477
ENSG00000257354.2	AC048341.1	-1.11252	0.00955319	-1.32551	0.00126172
ENSG00000011028.14	AC080038.1	-1.96391	0.0203573	4.54295	1.09892e-33
ENSG00000279852.1	AC083964.2	-1.08737	0.0260326	-1.10662	0.0112522
ENSG00000253190.3	AC084082.1	-1.28272	0.00982241	2.74605	2.60393e-06
ENSG00000265010.1	AC087301.1	-1.51319	0.0109126	1.77104	0.000539897
ENSG00000280828.1	AC090114.3	-1.18028	0.0261608	2.15964	2.88394e-05
ENSG00000274528.1	AC090970.2	1.46548	0.0102022	-1.92024	0.00428207
ENSG00000282418.1	AC092811.2	-2.43994	0.00324271	5.02018	3.98158e-06
ENSG00000274238.1	AC097478.2	-2.64179	0.000605362	7.06541	4.96114e-05
ENSG00000283973.1	AC099795.1	2.99034	0.0222308	-3.72078	0.000624414
ENSG00000260293.2	AC106820.4	-1.1759	0.0260832	2.10786	7.52363e-06
ENSG00000222001.2	AC106876.1	2.29365	0.00115152	-1.91465	0.00141857
ENSG00000245025.2	AC107959.1	-1.74513	0.0212871	1.87044	0.000338307
ENSG00000243885.1	AC108751.4	1.2949	0.0301016	-1.58255	8.21923e-05
ENSG00000240241.5	AC108752.1	-2.09417	0.0157962	4.01429	5.98502e-12
ENSG00000254186.2	AC113414.1	-1.42583	0.0091772	2.05122	0.00147414
ENSG00000226767.1	AC114501.1	3.36854	0.000226112	-3.89321	1.50759e-05
ENSG00000262558.1	AC129507.3	1.25746	0.0400295	-1.87151	0.00277028
ENSG00000279196.1	AC135048.4	-1.35731	0.0288488	2.43756	1.27905e-05
ENSG00000255328.1	AC136475.5	1.88025	0.0130536	-3.32184	2.90621e-05
ENSG00000270030.1	AC136475.7	2.25242	0.00416907	-2.2094	7.76507e-05
ENSG00000256092.2	AC137767.1	-1.46876	0.000707122	-1.89796	1.33677e-06
ENSG00000261273.1	AC138512.1	1.42489	0.0453694	4.20386	0.000656487
ENSG00000260628.5	AC142381.3	-1.66869	0.0164861	7.36731	1.14076e-06
ENSG00000230964.1	AC233266.1	-2.21947	0.000825751	2.99891	0.000481847
ENSG00000261600.1	AC233266.2	-1.67454	0.00988297	3.57127	5.9863e-11
ENSG00000231064.7	AC234582.1	-3.25791	0.0443951	-2.59506	0.00260043
ENSG00000286129.1	AC245060.7	-1.22909	0.0454188	1.36642	0.000147124
ENSG00000087085.15	ACHE	-1.21525	0.0221154	4.08424	4.12346e-34
ENSG00000168306.13	ACOX2	1.06068	0.0128097	-1.31357	6.80637e-06
ENSG00000066813.14	ACSM2B	2.32534	0.0115912	-1.75244	0.000535467
ENSG00000183549.10	ACSM5	1.20515	0.020445	-2.64344	8.24234e-08
ENSG00000114948.13	ADAM23	-2.18045	0.0141584	2.44942	2.71239e-12
ENSG00000049192.15	ADAMTS6	1.52442	0.0155317	2.12934	2.00516e-15
ENSG00000136378.15	ADAMTS7	-1.3446	0.0290569	5.59766	2.65784e-78
ENSG00000197859.10	ADAMTSL2	1.69644	0.000261964	-1.83313	1.8958e-07
ENSG00000164742.16	ADCY1	-1.46669	0.0030402	1.13365	0.000175918
ENSG00000111452.13	ADGRD1	-1.32337	0.00835579	1.40224	0.0026015
ENSG00000198099.8	ADH4	1.44069	0.0245368	-1.40349	5.64388e-06
ENSG00000169252.5	ADRB2	-2.43583	0.00930714	3.8759	2.36406e-07
ENSG00000157510.14	AFAP1L1	-1.24904	0.0114069	-1.6473	0.001265
ENSG00000198221.8	AFDN-DT	1.3525	0.0042173	-1.37446	0.000283757
ENSG00000106541.12	AGR2	1.26287	0.00655593	-1.71086	0.0105747
ENSG00000185567.7	AHNAK2	-2.83534	0.00734771	3.54775	3.75098e-21
ENSG00000122787.15	AKR1D1	1.60001	0.0225428	-2.07325	1.44457e-10
ENSG00000117020.17	AKT3	-1.49442	0.00786059	-1.79383	1.89983e-05
ENSG00000234869.1	AL021392.1	1.62035	0.0140497	5.77045	0.00546069
ENSG00000278383.1	AL031673.1	-1.8893	0.000821163	1.48552	0.00147103
ENSG00000233017.2	AL121832.1	-3.17198	0.019479	-6.00538	0.00228707
ENSG00000270001.1	AL121894.2	-1.06537	0.0387507	1.64388	0.000421522
ENSG00000275223.1	AL121906.2	1.16703	0.0123332	-1.38745	0.00137313
ENSG00000227589.1	AL136528.1	2.15634	0.00101917	-2.74717	0.0118156
ENSG00000224592.5	AL139158.2	-1.02322	0.0105072	10.6249	8.83031e-13
ENSG00000272841.1	AL139393.2	-1.59073	0.000250877	-1.46632	0.000171153
ENSG00000280660.1	AL157396.1	2.00738	0.0207601	2.15755	7.06339e-05
ENSG00000230074.1	AL162231.2	-1.92463	0.0054983	3.94473	3.54925e-10
ENSG00000236924.1	AL162411.1	2.5357	0.00306501	-1.8607	1.76725e-05
ENSG00000225339.3	AL354740.1	-1.69069	0.0186818	2.27314	6.08214e-05
ENSG00000232774.7	AL355916.1	-1.85508	0.00234208	1.62526	0.00994256
ENSG00000274702.1	AL357559.1	1.9726	0.0340919	7.04454	4.48452e-05
ENSG00000285280.1	AL390957.1	1.47315	0.0373689	-1.54555	0.000107374
ENSG00000237976.1	AL391069.2	-1.77629	0.0403908	-2.97275	3.91002e-10
ENSG00000258592.1	AL391152.1	-1.15347	0.0313597	3.85288	2.54755e-05
ENSG00000224750.6	AL391704.1	-2.78314	0.0365077	3.25152	0.00756091
ENSG00000285911.1	AL391834.3	-1.08838	0.0323618	7.36354	1.11559e-05
ENSG00000258813.2	AL442663.3	-1.65218	0.0400613	-1.84989	0.00547274
ENSG00000260604.2	AL590004.3	1.48681	0.000488064	-2.4135	2.80171e-22
ENSG00000272235.1	AL590438.1	2.11505	0.0279051	-5.8587	0.00311062
ENSG00000224417.2	AL606970.1	1.00181	0.00460988	-1.45555	3.73323e-06
ENSG00000184254.17	ALDH1A3	-1.726	0.0220309	5.94662	5.62402e-25
ENSG00000144908.13	ALDH1L1	-1.21214	0.0239184	2.23888	3.94689e-13
ENSG00000116194.13	ANGPTL1	4.35471	0.000322715	-3.48347	3.32946e-15
ENSG00000215559.8	ANKRD20A11P	-2.13038	0.0464936	8.44429	1.23176e-11
ENSG00000089847.12	ANKRD24	-1.41069	0.0142533	4.19823	1.54024e-06
ENSG00000175311.7	ANKS4B	1.7818	0.000428383	-2.21231	1.82831e-12
ENSG00000206199.10	ANKUB1	-2.12734	0.00125418	3.09619	4.04609e-10
ENSG00000151572.18	ANO4	-2.19129	0.0228	1.97815	3.20678e-05
ENSG00000143401.15	ANP32E	1.24809	0.00363731	-1.6277	5.22691e-11
ENSG00000166825.14	ANPEP	1.06377	0.00437406	-1.29274	1.1493e-05
ENSG00000286153.1	AP000331.1	1.52811	0.0250786	3.72472	3.03869e-08
ENSG00000273102.1	AP000569.1	1.29181	0.0158458	-2.11437	0.00905892
ENSG00000263727.1	AP001178.1	-1.09162	0.00537937	2.30393	3.0305e-07
ENSG00000255062.1	AP001318.2	1.5412	0.00201482	-1.80192	5.41951e-05
ENSG00000267733.5	AP005264.5	-2.04326	0.0437767	3.153	0.000121643
ENSG00000113108.19	APBB3	-1.04189	0.0217477	4.72505	2.41002e-06
ENSG00000110244.7	APOA4	1.79111	0.0317735	-4.70295	8.48111e-22
ENSG00000184730.11	APOBR	-1.39462	0.0366585	1.64696	0.00409201
ENSG00000175336.10	APOF	1.67868	0.0193896	-3.05652	4.39124e-15
ENSG00000204444.11	APOM	1.77498	0.0167812	-1.07254	0.000103543
ENSG00000112379.9	ARFGEF3	1.27279	0.00035842	1.1253	5.13522e-06
ENSG00000128805.14	ARHGAP22	-1.41741	0.0116432	2.46267	1.00725e-08
ENSG00000260781.1	ARHGAP23P1	-2.14772	0.0110957	3.29559	0.00582646
ENSG00000186517.14	ARHGAP30	-1.31169	0.0208252	5.81472	0.000316647
ENSG00000214944.9	ARHGEF28	1.21373	0.00019944	1.33203	2.18247e-08
ENSG00000111339.12	ART4	1.97623	0.000371571	-1.32282	0.000212836
ENSG00000005981.13	ASB4	2.29077	0.00014231	-1.1227	0.000941062
ENSG00000105011.9	ASF1B	-1.27543	0.00532843	-1.32498	1.13215e-05
ENSG00000271614.1	ATP2B1-AS1	-1.32906	0.00615057	-2.22667	0.000172749
ENSG00000157087.19	ATP2B2	-1.86266	0.0164537	4.63482	5.55596e-55
ENSG00000081923.13	ATP8B1	-1.09925	0.00612698	2.07933	6.63455e-13
ENSG00000054793.13	ATP9A	1.18749	0.00125266	-1.07667	3.52804e-05
ENSG00000109956.13	B3GAT1	-3.24707	0.0123528	-4.53566	3.29165e-06
ENSG00000179913.10	B3GNT3	2.92701	3.32619e-05	-1.49248	0.000356658
ENSG00000135454.14	B4GALNT1	1.44388	0.00440552	-1.0626	0.000129802
ENSG00000139044.11	B4GALNT3	-1.72343	0.00121339	-1.12819	0.00025239
ENSG00000186318.16	BACE1	-1.07914	0.0088398	1.53196	5.57491e-10
ENSG00000156127.6	BATF	1.49348	0.00112617	-2.04869	5.08333e-05
ENSG00000060982.15	BCAT1	1.10099	0.0156561	-2.54013	5.84378e-23
ENSG00000258057.5	BCDIN3D-AS1	-1.51594	0.0383116	1.77921	0.00555646
ENSG00000183092.16	BEGAIN	-1.94824	0.0068639	3.56295	0.000148817
ENSG00000133169.6	BEX1	-1.01969	0.015433	-3.10741	6.61485e-24
ENSG00000102409.10	BEX4	-2.84215	0.0394045	-2.43781	0.010443
ENSG00000123095.6	BHLHE41	1.77611	0.0234589	-3.59281	8.30035e-05
ENSG00000145692.15	BHMT	1.7303	0.00428279	-1.75337	0.00206129
ENSG00000132840.10	BHMT2	1.06075	0.005707	-1.54614	4.41699e-08
ENSG00000151746.14	BICD1	1.66236	0.00232073	-2.34559	3.3861e-14
ENSG00000136717.15	BIN1	1.13955	0.012718	-2.08322	6.25567e-10
ENSG00000125845.7	BMP2	-1.93017	0.0225086	-2.49643	0.000250093
ENSG00000101144.13	BMP7	-2.19287	0.0158013	6.4464	2.05263e-35
ENSG00000183682.8	BMP8A	-1.1695	0.0342483	4.65833	2.69107e-16
ENSG00000111801.16	BTN3A3	1.13727	0.0110827	-1.79988	1.15863e-06
ENSG00000154102.11	C16orf74	-2.40517	0.0192141	3.02368	0.0099981
ENSG00000141219.15	C17orf80	-1.26293	0.00218382	1.49864	1.49328e-08
ENSG00000165985.10	C1QL3	-1.37032	0.0290194	6.20531	3.90419e-16
ENSG00000204661.9	C5orf60	-1.66936	0.0288089	3.0686	0.00621786
ENSG00000188959.9	C9orf152	1.55237	0.0106098	-2.29759	5.33708e-05
ENSG00000154040.20	CABYR	-1.22336	0.00312158	7.1325	5.36436e-57
ENSG00000169885.10	CALML6	-1.936	0.00291076	4.84594	7.88923e-06
ENSG00000112186.12	CAP2	1.27123	0.00172915	-1.0341	2.08001e-05
ENSG00000135773.13	CAPN9	-2.07865	0.000627117	2.65164	5.84034e-10
ENSG00000132357.14	CARD6	1.2753	0.0446003	-1.9254	0.00245346
ENSG00000174898.16	CATSPERD	-1.68034	0.0298324	3.35921	6.19336e-14
ENSG00000105971.15	CAV2	-1.31802	0.00347047	2.03876	0.000108689
ENSG00000151468.11	CCDC3	-2.66578	0.00703706	3.35439	4.50021e-12
ENSG00000183273.7	CCDC60	-1.38835	0.0114597	7.43905	6.03468e-25
ENSG00000166510.14	CCDC68	1.56307	0.0356009	-1.78649	8.1753e-06
ENSG00000118523.6	CCN2	1.83631	8.42418e-05	1.35882	6.85073e-08
ENSG00000105173.14	CCNE1	-1.23952	0.000967906	-1.91777	4.60357e-12
ENSG00000175305.17	CCNE2	-1.06198	0.0116741	-3.09548	4.2253e-23
ENSG00000184451.5	CCR10	1.50776	0.039032	-1.94622	0.00968721
ENSG00000112486.16	CCR6	2.14409	0.0394277	-2.65129	0.00296505
ENSG00000226015.2	CCT8P1	1.50802	0.0155062	-1.23081	0.00174533
ENSG00000156535.15	CD109	1.17769	0.00115555	4.22028	4.83022e-56
ENSG00000135218.19	CD36	1.21181	0.00971452	1.72971	4.16565e-05
ENSG00000163171.7	CDC42EP3	-1.59167	0.0490033	1.15866	0.00498918
ENSG00000164649.20	CDCA7L	1.60681	0.0219148	-2.57822	1.93298e-20
ENSG00000040731.10	CDH10	-2.1516	0.00278856	3.22562	0.0022692
ENSG00000062038.14	CDH3	-2.19429	0.00934362	2.63521	5.44082e-07
ENSG00000074276.10	CDHR2	1.23429	0.0395313	1.23942	0.00201508
ENSG00000159409.14	CELF3	-1.47692	0.0259609	5.07978	7.59496e-24
ENSG00000198848.12	CES1	-2.17229	0.00017483	2.17653	2.55792e-17
ENSG00000228695.10	CES1P1	-1.94931	0.000576508	1.52856	1.26432e-08
ENSG00000087237.12	CETP	1.28313	0.012971	-2.09542	2.72218e-07
ENSG00000116254.18	CHD5	-1.07791	0.0306573	2.97006	3.17183e-19
ENSG00000169684.13	CHRNA5	-1.50524	0.00636858	-1.38089	8.57157e-05
ENSG00000166165.13	CKB	-1.17659	0.000554992	-1.08072	0.000112584
ENSG00000137975.8	CLCA2	-1.85292	0.0227457	2.67759	5.858e-06
ENSG00000171365.17	CLCN5	1.35762	0.000303934	-1.71434	5.54553e-12
ENSG00000125246.15	CLYBL	1.10277	0.00348428	1.82187	2.60617e-07
ENSG00000130176.8	CNN1	-1.13866	0.0443148	-1.5484	0.00252351
ENSG00000018236.15	CNTN1	-1.14402	0.0177298	2.17558	0.000359294
ENSG00000276386.1	CNTNAP3P2	1.74066	0.00139569	2.07697	2.9738e-06
ENSG00000214290.8	COLCA2	1.13764	0.0374316	-1.19789	1.67728e-05
ENSG00000198756.12	COLGALT2	2.69207	2.4815e-05	-2.38012	4.32975e-19
ENSG00000247624.6	CPEB2-DT	-2.2371	0.0253374	2.80401	0.00012395
ENSG00000145920.15	CPLX2	1.17987	0.000334591	1.6926	1.10173e-06
ENSG00000106066.15	CPVL	1.14864	0.000784106	-1.16243	3.95459e-06
ENSG00000060566.14	CREB3L3	2.16426	0.000681284	-2.88158	4.60565e-11
ENSG00000146592.17	CREB5	-1.21522	0.00183312	-1.75817	5.40561e-10
ENSG00000146215.13	CRIP3	1.31743	0.0356201	-3.41481	1.1687e-09
ENSG00000103196.12	CRISPLD2	-1.49033	0.0499882	1.60392	1.8529e-05
ENSG00000227684.2	CROCCP4	-1.68604	0.00731795	1.92462	0.00588561
ENSG00000095713.14	CRTAC1	-2.5949	0.000981246	2.1229	0.0036524
ENSG00000101441.4	CST4	-2.72833	0.00802486	5.67242	6.0018e-13
ENSG00000170367.5	CST5	-3.08085	0.00315015	8.91689	1.11211e-09
ENSG00000121552.4	CSTA	-1.69448	0.00662874	10.5393	2.08341e-135
ENSG00000163131.11	CTSS	1.13593	0.0185396	-1.32801	0.00832432
ENSG00000277067.4	CU634019.1	1.21008	0.00875248	-1.88227	7.83458e-06
ENSG00000095596.12	CYP26A1	-1.90228	0.0486113	3.40057	0.00420014
ENSG00000021461.16	CYP3A43	-1.32507	0.0337019	3.41514	2.39841e-16
ENSG00000186115.13	CYP4F2	-1.71246	0.00217189	6.22545	2.40406e-105
ENSG00000172817.4	CYP7B1	-1.7077	0.00819011	-1.60812	0.000235979
ENSG00000197191.5	CYSRT1	-1.08945	0.0105364	6.62773	7.53145e-57
ENSG00000132437.18	DDC	1.84735	0.02116	-3.59292	4.96304e-24
ENSG00000183628.13	DGCR6	-1.99141	0.00761711	6.00955	0.000220309
ENSG00000058866.15	DGKG	1.69822	0.000185128	-1.23635	2.26908e-05
ENSG00000187773.8	DIPK1C	-1.86098	0.00742185	4.80736	0.000310908
ENSG00000104371.5	DKK4	1.56722	0.00583776	-5.20364	7.23448e-12
ENSG00000144355.15	DLX1	1.11066	0.0206936	-2.36623	3.18093e-07
ENSG00000108813.11	DLX4	-1.44998	0.0224528	-1.90718	1.96652e-08
ENSG00000167646.13	DNAAF3	-1.61702	0.0075991	2.42472	2.9404e-07
ENSG00000197653.15	DNAH10	-1.33764	0.029011	2.86683	2.05585e-16
ENSG00000137094.14	DNAJB5	-1.30798	0.00771783	1.73789	1.20372e-07
ENSG00000272636.4	DOC2B	-2.40928	0.0134635	1.61591	0.00518571
ENSG00000092964.18	DPYSL2	1.62297	0.000133767	-2.50324	2.65351e-24
ENSG00000151640.13	DPYSL4	-1.32729	0.0347275	7.42295	2.31868e-96
ENSG00000162490.7	DRAXIN	-1.68128	0.0362352	9.15342	3.90549e-25
ENSG00000159625.14	DRC7	1.52428	0.0285289	-3.02666	9.78043e-06
ENSG00000177103.14	DSCAML1	-1.58913	0.00335951	5.68466	3.56784e-30
ENSG00000171451.14	DSEL	-1.46289	0.000500604	2.29306	2.04548e-09
ENSG00000243701.6	DUBR	-1.24988	0.0323277	3.12755	4.71178e-14
ENSG00000140274.13	DUOXA2	-2.05434	0.00615609	6.46328	1.73596e-08
ENSG00000149599.15	DUSP15	-1.55857	0.00242581	-2.58872	4.06777e-09
ENSG00000232815.1	DUX4L50	-1.10729	0.0332375	6.64879	6.15594e-09
ENSG00000165891.16	E2F7	-1.05788	0.00361914	1.43281	1.56795e-09
ENSG00000078401.7	EDN1	3.5245	5.82993e-05	1.57559	5.47202e-08
ENSG00000172771.12	EFCAB12	2.09828	0.000365886	-2.07239	5.63568e-06
ENSG00000115468.12	EFHD1	-1.8748	0.00859455	-2.52674	4.85499e-06
ENSG00000224057.1	EGFR-AS1	2.09193	0.012364	-1.8885	2.50716e-06
ENSG00000119915.5	ELOVL3	-1.22549	0.0481979	2.33847	0.00105235
ENSG00000170522.9	ELOVL6	-1.01827	0.0160086	-2.55975	3.89799e-22
ENSG00000183798.5	EMILIN3	-1.93465	0.00853207	-2.21726	2.88569e-07
ENSG00000213853.10	EMP2	1.81643	0.00599304	-2.69232	7.06407e-26
ENSG00000135638.13	EMX1	-1.42003	0.00645035	2.48051	6.59661e-13
ENSG00000168913.7	ENHO	-1.97161	0.00385111	2.45221	0.00109563
ENSG00000261580.1	ENPP7P13	-1.53599	0.00539455	2.83464	0.000356518
ENSG00000163508.12	EOMES	-1.32301	0.00270093	-1.13561	0.00549928
ENSG00000120915.13	EPHX2	1.50532	0.00120193	-1.30063	7.93237e-06
ENSG00000273604.1	EPOP	1.0816	0.00346977	-2.66564	1.48386e-24
ENSG00000261150.2	EPPK1	-1.46892	0.0315141	4.96132	9.53941e-66
ENSG00000198758.10	EPS8L3	1.3311	0.000434156	-1.92476	7.42202e-10
ENSG00000065361.15	ERBB3	1.41016	0.000384627	-1.20547	8.98179e-07
ENSG00000010030.14	ETV7	-1.35816	0.0212196	3.87394	3.56259e-09
ENSG00000166979.13	EVA1C	3.5377	0.00657423	-2.10733	0.00924633
ENSG00000145384.3	FABP2	2.12921	0.031404	-1.80735	0.000915337
ENSG00000162636.16	FAM102B	-1.25551	0.00566424	-1.05064	0.000478497
ENSG00000130054.4	FAM155B	-1.13535	0.00761012	-1.00313	0.00107221
ENSG00000164142.16	FAM160A1	1.13372	0.0251293	-2.03762	9.88692e-12
ENSG00000175170.15	FAM182B	-1.4402	0.036845	4.24405	2.32912e-37
ENSG00000108950.12	FAM20A	1.91387	0.0003683	-4.60944	6.27669e-30
ENSG00000174749.6	FAM241A	1.29277	0.000737793	-1.13763	0.000340729
ENSG00000231527.6	FAM27C	-1.1485	0.0354023	1.13486	0.0101125
ENSG00000168672.4	FAM84B	-1.28379	0.0175962	3.66302	1.07825e-35
ENSG00000182118.8	FAM89A	-1.06773	0.000938693	-1.4304	1.73299e-05
ENSG00000153789.13	FAM92B	-2.5025	0.0401858	5.23775	0.00266249
ENSG00000138829.12	FBN2	-1.88847	0.0142027	5.50974	2.42258e-74
ENSG00000164616.16	FBXL21P	-1.00925	0.000691507	1.45848	9.5956e-08
ENSG00000158869.11	FCER1G	1.94899	0.00413181	-2.17319	0.00725942
ENSG00000132185.16	FCRLA	-1.8359	0.0169783	10.8484	2.83406e-13
ENSG00000171560.15	FGA	2.85602	0.00474527	-1.88025	5.42568e-10
ENSG00000171564.11	FGB	2.83413	0.0104763	-1.84118	2.29697e-11
ENSG00000066468.22	FGFR2	-1.82206	0.00587072	1.75601	7.45483e-10
ENSG00000171557.16	FGG	2.81228	0.00726778	-2.35288	1.01272e-13
ENSG00000115641.19	FHL2	2.14682	0.000476886	1.73357	9.2199e-09
ENSG00000182263.14	FIGN	1.94612	0.0036295	-1.82453	6.25993e-11
ENSG00000261308.2	FIGNL2	-1.5592	0.0198456	-1.64999	0.000562186
ENSG00000213468.6	FIRRE	1.13005	0.0197966	-1.01621	9.35874e-05
ENSG00000185070.11	FLRT2	-1.18317	0.00968263	2.56132	8.23947e-24
ENSG00000131781.13	FMO5	2.86132	0.00471769	-1.65253	1.22749e-09
ENSG00000137273.5	FOXF2	-1.30714	0.01773	-2.87236	8.52366e-06
ENSG00000164946.19	FREM1	1.98788	0.0296229	-3.69688	3.73152e-46
ENSG00000150175.13	FRMPD2B	-1.37804	0.00981773	3.65647	4.17096e-07
ENSG00000168843.14	FSTL5	1.04945	0.0327955	2.41608	6.22418e-05
ENSG00000165060.13	FXN	1.13634	0.00361301	-1.05345	0.000127804
ENSG00000187889.13	FYB2	-1.01781	0.0154633	3.93537	2.35249e-28
ENSG00000188763.4	FZD9	-1.30766	0.0206969	-1.47798	0.00211805
ENSG00000204681.11	GABBR1	-1.70849	0.0468129	-2.23796	1.29969e-06
ENSG00000226443.3	GAPDHP32	-1.62209	0.00855871	4.69805	9.30828e-08
ENSG00000148935.11	GAS2	2.09018	0.011067	-2.10888	3.67962e-13
ENSG00000007237.18	GAS7	-1.41967	0.0499812	-2.67839	1.23662e-16
ENSG00000184502.4	GAST	-1.77815	0.0230803	6.32284	4.12051e-19
ENSG00000117228.10	GBP1	1.12223	0.023927	-2.76888	7.25932e-05
ENSG00000084734.9	GCKR	2.71582	7.64299e-06	-1.81989	8.7361e-08
ENSG00000119125.16	GDA	3.89538	0.000691134	-3.48239	2.52093e-40
ENSG00000136487.18	GH2	-2.27664	0.00634419	8.58895	3.47132e-08
ENSG00000189280.3	GJB5	-2.39119	0.0169114	4.9561	0.00643446
ENSG00000122694.16	GLIPR2	-1.60423	0.0115596	2.79238	1.08951e-14
ENSG00000126603.8	GLIS2	-1.03865	0.0172809	2.71944	7.22108e-13
ENSG00000196743.8	GM2A	-1.15697	0.031715	3.46402	2.41736e-44
ENSG00000141404.16	GNAL	1.37563	0.00216067	-3.20527	9.06928e-19
ENSG00000076716.9	GPC4	-1.56637	0.0409815	1.63235	2.03568e-07
ENSG00000167588.13	GPD1	2.01144	0.00042995	-1.69963	0.000466128
ENSG00000164850.15	GPER1	1.21598	0.00341871	-2.13883	8.81599e-10
ENSG00000077585.14	GPR137B	1.69911	0.00412216	-2.23979	2.56907e-08
ENSG00000158292.7	GPR153	-1.27272	0.0292721	2.15299	8.83845e-09
ENSG00000143147.14	GPR161	-1.11643	0.0165536	-2.63595	7.42335e-19
ENSG00000102195.9	GPR50	-2.06438	0.0478747	5.2677	3.03928e-24
ENSG00000013588.8	GPRC5A	1.7328	0.00819987	-1.54447	0.000121566
ENSG00000116032.5	GRIN3B	-1.73502	0.0338287	3.267	6.23376e-10
ENSG00000243955.6	GSTA1	-1.35378	0.00638231	-2.08352	0.00173463
ENSG00000113249.12	HAVCR1	1.19569	0.00421838	1.91279	0.00542908
ENSG00000196917.5	HCAR1	2.10719	0.000519563	-1.8021	1.40329e-06
ENSG00000182782.7	HCAR2	-1.07459	0.00255501	3.83237	9.0891e-19
ENSG00000099822.3	HCN2	-2.0925	0.0167938	3.0575	4.15568e-12
ENSG00000138622.4	HCN4	-1.96215	0.00844376	2.07594	0.00313317
ENSG00000166503.9	HDGFL3	-1.67857	0.00279647	-2.60359	3.24221e-16
ENSG00000010704.18	HFE	1.57196	0.000350616	-1.90208	1.49296e-07
ENSG00000054392.13	HHAT	-1.00937	0.00199256	4.29116	6.73729e-59
ENSG00000156510.13	HKDC1	1.64544	4.3584e-05	-2.00832	1.39982e-10
ENSG00000148357.16	HMCN2	-1.88028	0.0331067	2.57576	1.08051e-05
ENSG00000188620.10	HMX3	1.20327	0.0335598	-1.83446	0.00209517
ENSG00000162040.6	HS3ST6	-2.24984	0.0480053	6.30629	0.000808784
ENSG00000198189.11	HSD17B11	1.59458	0.0100699	-1.47753	2.59471e-08
ENSG00000251348.1	HSPD1P11	1.62103	0.0110799	1.04115	0.00680099
ENSG00000119917.14	IFIT3	1.50872	0.00446287	-2.72558	6.58958e-07
ENSG00000185201.16	IFITM2	2.08004	0.0109769	-1.2796	3.52132e-05
ENSG00000142089.16	IFITM3	1.19141	0.0130293	-1.61483	6.25282e-08
ENSG00000100360.15	IFT27	-2.40138	0.00180996	-1.76649	0.00928802
ENSG00000146678.10	IGFBP1	2.1257	0.0104441	1.75455	6.6785e-14
ENSG00000115457.10	IGFBP2	1.06888	0.00106759	3.28728	7.49106e-13
ENSG00000134470.21	IL15RA	1.45082	0.0075626	-2.32157	0.000174493
ENSG00000172458.4	IL17D	-2.24288	0.00127002	-1.7294	0.00207733
ENSG00000115604.10	IL18R1	1.54817	0.0465555	-3.6665	8.01192e-12
ENSG00000115594.12	IL1R1	1.61719	0.000252954	-1.44115	6.4603e-09
ENSG00000115590.14	IL1R2	1.73281	0.00949645	-2.53683	1.21077e-05
ENSG00000103522.16	IL21R	-1.52638	0.0431932	3.54007	9.36521e-11
ENSG00000137033.11	IL33	-2.38677	0.00391507	5.32337	5.77825e-29
ENSG00000175189.4	INHBC	1.4555	0.00291721	-1.57433	4.34966e-05
ENSG00000185614.5	INKA1	-1.58645	0.0315646	2.53151	7.64497e-05
ENSG00000227811.2	INKA2-AS1	-1.45244	0.00449512	1.30526	0.00360725
ENSG00000134070.5	IRAK2	1.03853	0.00219916	-1.15008	0.000209995
ENSG00000101230.6	ISM1	-1.07563	0.00743037	-1.95794	2.69725e-11
ENSG00000005961.18	ITGA2B	-1.1413	0.0450281	1.97279	1.5493e-08
ENSG00000158764.7	ITLN2	-3.07689	0.00147775	4.46327	0.00131573
ENSG00000184916.9	JAG2	-1.77522	0.0392998	4.65072	1.40856e-18
ENSG00000269993.1	KC877982.1	-2.20856	0.0198134	5.50141	7.63693e-08
ENSG00000116396.14	KCNC4	-1.04646	0.0461454	1.42683	3.4148e-07
ENSG00000175538.10	KCNE3	2.74403	0.00100774	-2.05159	0.00986031
ENSG00000089558.9	KCNH4	-1.75634	0.0138453	3.14707	4.38448e-13
ENSG00000168135.4	KCNJ4	-1.64096	0.0388968	5.24045	0.00281136
ENSG00000100433.15	KCNK10	-1.88897	0.0466278	1.76468	0.00512902
ENSG00000112078.14	KCTD20	1.13067	0.000268961	-1.13655	2.06165e-06
ENSG00000136883.14	KIF12	1.29682	0.00341232	-1.75829	2.56604e-05
ENSG00000155980.12	KIF5A	2.04968	0.000570834	-1.43955	7.75858e-07
ENSG00000118922.17	KLF12	1.48922	0.0229944	-2.6221	6.39753e-11
ENSG00000227268.3	KLLN	-1.08847	0.0197455	2.16852	1.25261e-06
ENSG00000131650.14	KREMEN2	-1.89843	0.0063179	1.49515	2.52163e-05
ENSG00000101680.15	LAMA1	-1.71477	0.00170853	3.89418	2.09091e-35
ENSG00000196878.15	LAMB3	-2.02806	0.0231284	2.99265	1.37654e-06
ENSG00000100079.7	LGALS2	2.07841	0.00313938	-2.02291	0.000255936
ENSG00000131981.16	LGALS3	1.02668	0.0011692	1.29016	4.9521e-06
ENSG00000187772.8	LIN28B	1.17637	0.0138513	-1.71976	1.55933e-11
ENSG00000203809.6	LIN28B-AS1	-1.15342	0.0441562	-1.47635	0.00903793
ENSG00000231535.6	LINC00278	1.45734	0.0307132	3.35301	3.53152e-07
ENSG00000178977.3	LINC00324	-1.0023	0.0340893	3.21395	2.59076e-20
ENSG00000265933.5	LINC00668	2.68604	0.000973018	-2.78292	2.63322e-09
ENSG00000243083.6	LINC00870	2.46523	0.00839147	-3.22677	5.3052e-09
ENSG00000246898.1	LINC00920	1.79033	0.0193242	-2.22854	1.40249e-08
ENSG00000249267.6	LINC00939	-1.64493	0.00779337	2.64229	0.000466865
ENSG00000232560.6	LINC01549	3.38212	0.01348	-4.01626	1.75934e-06
ENSG00000225328.1	LINC01594	-3.60104	0.00449264	2.73134	0.00349704
ENSG00000227764.1	LINC01693	2.93651	0.00337088	5.3055	0.0022471
ENSG00000242741.1	LINC02005	-1.54925	0.0169502	4.57521	2.88763e-08
ENSG00000273033.2	LINC02035	-1.04738	0.00782351	1.00353	0.00278999
ENSG00000248461.2	LINC02119	1.37272	0.0141825	-2.13664	5.78875e-08
ENSG00000258474.1	LINC02313	1.64015	0.000733663	-2.47298	4.88143e-09
ENSG00000203688.5	LINC02487	2.27427	0.0220187	-1.96886	0.00751696
ENSG00000234155.1	LINC02535	1.74572	0.0161019	-3.16406	4.94124e-12
ENSG00000272549.1	LINC02538	1.7881	0.0346071	-2.08758	0.000944414
ENSG00000186235.10	LINC02610	-1.3325	0.0263923	5.51265	7.22954e-06
ENSG00000101670.12	LIPG	-1.92598	0.000710157	-2.69357	3.93819e-14
ENSG00000206535.8	LNP1	2.46531	0.000963015	-1.42858	1.32695e-05
ENSG00000129038.16	LOXL1	-1.87327	0.030412	5.15303	1.10191e-28
ENSG00000139679.15	LPAR6	2.02547	0.0211959	-2.30368	2.04386e-16
ENSG00000145012.13	LPP	1.00603	0.0272985	1.10496	3.42283e-06
ENSG00000164109.14	MAD2L1	-1.66966	0.000117193	-1.16087	1.33771e-06
ENSG00000143194.13	MAEL	-1.34102	0.0292858	3.88962	6.18533e-05
ENSG00000178573.7	MAF	-1.76368	0.018575	-1.85572	1.8785e-06
ENSG00000182759.3	MAFA	-1.18041	0.0277793	1.80208	2.7643e-06
ENSG00000204103.4	MAFB	-2.53425	0.00788101	3.40018	5.7452e-26
ENSG00000176746.6	MAGEB6	-2.16525	0.0242957	2.3677	0.0107715
ENSG00000185386.15	MAPK11	-1.64538	0.013117	5.36894	5.58423e-25
ENSG00000132031.13	MATN3	1.87675	0.000521569	1.13914	1.79463e-06
ENSG00000140563.15	MCTP2	2.56563	0.00205514	2.68659	3.82614e-05
ENSG00000112559.14	MDFI	-1.85607	0.018967	4.80653	3.00353e-38
ENSG00000135272.10	MDFIC	-2.47483	0.00191157	3.17931	0.00122626
ENSG00000105419.17	MEIS3	-1.50274	0.00156121	-3.74476	6.40002e-21
ENSG00000112818.10	MEP1A	2.20272	0.00247438	-1.22588	0.00124592
ENSG00000105976.15	MET	1.27535	0.0223744	-1.3886	1.31963e-08
ENSG00000170439.7	METTL7B	1.79133	0.000716075	-2.94164	4.81893e-19
ENSG00000198948.12	MFAP3L	-1.46032	0.00351401	1.41463	0.000102531
ENSG00000100060.17	MFNG	1.95697	0.00218803	-2.49227	7.64443e-15
ENSG00000008394.13	MGST1	1.37097	0.000814542	-1.61762	5.79245e-08
ENSG00000244625.6	MIATNB	-2.26247	0.0190673	-1.85447	0.00341712
ENSG00000218537.1	MIF-AS1	-1.25632	0.0225583	1.12766	0.00387903
ENSG00000268654.2	MIMT1	2.26514	0.0365766	-1.47374	0.000266044
ENSG00000253522.6	MIR3142HG	2.72969	0.00696794	-1.08429	0.000483441
ENSG00000265462.1	MIR3680-1	-1.84291	0.0314443	1.44304	0.00128724
ENSG00000197182.14	MIRLET7BHG	2.18236	0.0477732	2.5435	0.001006
ENSG00000168404.13	MLKL	1.50883	0.00381946	-1.98205	2.29063e-07
ENSG00000157227.13	MMP14	-1.30953	0.00874416	1.44942	5.14145e-07
ENSG00000087245.13	MMP2	-2.02866	0.000194524	2.17386	1.16806e-10
ENSG00000124003.12	MOGAT1	-3.27701	0.0390131	-2.01722	0.000856918
ENSG00000143158.11	MPC2	1.00755	0.03798	-1.7205	1.87706e-11
ENSG00000251141.5	MRPS30-DT	1.42465	0.0147096	-1.69942	0.0101655
ENSG00000135097.7	MSI1	-1.62586	0.00672043	-3.49991	9.15132e-26
ENSG00000174099.11	MSRB3	-1.02049	0.0348885	-1.67241	3.654e-05
ENSG00000169715.14	MT1E	1.33442	0.00901456	-1.34066	8.92627e-06
ENSG00000187193.9	MT1X	1.57012	0.0328669	-1.53422	3.02843e-07
ENSG00000125148.7	MT2A	1.37469	0.000184655	2.54671	6.62161e-23
ENSG00000162840.4	MT2P1	1.60534	0.000274524	3.35647	8.10488e-07
ENSG00000163738.18	MTHFD2L	1.26325	0.0226583	-1.61996	1.96686e-08
ENSG00000014914.21	MTMR11	1.80592	8.85031e-05	-1.54804	0.00757876
ENSG00000138823.13	MTTP	2.66757	0.047003	-4.21001	6.17864e-34
ENSG00000173702.7	MUC13	1.38861	0.0419864	-3.51033	2.49172e-23
ENSG00000181143.15	MUC16	-1.02072	0.0424378	2.13943	1.96544e-07
ENSG00000179820.16	MYADM	1.03048	0.0351523	-2.15476	2.86383e-17
ENSG00000134323.12	MYCN	2.43562	0.000287387	-4.18289	1.4839e-29
ENSG00000077616.11	NAALAD2	1.21123	0.0118038	-1.71898	2.38679e-09
ENSG00000186462.8	NAP1L2	3.63472	0.000136456	-2.26912	0.00334439
ENSG00000184454.7	NCMAP	1.97958	0.0467568	-2.3476	0.00782896
ENSG00000111912.20	NCOA7	1.31944	0.00540125	-1.59095	1.97182e-08
ENSG00000245532.8	NEAT1	1.05729	0.0132609	1.9762	1.09813e-16
ENSG00000175319.3	NF1P5	-2.40675	0.0169684	5.31487	0.00228457
ENSG00000188158.15	NHS	-1.51116	0.0317354	1.90208	0.000129365
ENSG00000091592.16	NLRP1	1.35792	0.00378409	-1.75864	1.66046e-10
ENSG00000123609.10	NMI	2.42313	0.000212688	-2.25889	2.39161e-07
ENSG00000163273.4	NPPC	-1.66173	0.00269421	1.35823	0.0106571
ENSG00000116833.14	NR5A2	2.74277	9.39998e-05	-2.19079	6.68155e-05
ENSG00000198435.4	NRARP	-1.07795	0.00149994	1.48532	2.98665e-06
ENSG00000118257.16	NRP2	-1.57558	0.00415413	3.17911	5.98901e-35
ENSG00000065320.9	NTN1	-1.5788	0.0409456	6.37498	8.16196e-79
ENSG00000162068.1	NTN3	-1.5522	0.0446973	2.55108	1.07566e-05
ENSG00000182379.10	NXPH4	-2.28226	0.00406825	2.02186	5.70659e-05
ENSG00000089127.13	OAS1	1.80969	2.04282e-05	-1.1711	0.00088131
ENSG00000109205.16	ODAM	2.55644	0.00454252	-1.18534	0.00132942
ENSG00000116329.11	OPRD1	-1.45917	0.0143327	-2.73693	5.44844e-14
ENSG00000116885.18	OSCP1	-1.12743	0.0145268	2.09971	2.20173e-05
ENSG00000257838.5	OTOAP1	-1.16409	0.017121	4.65054	2.85989e-59
ENSG00000145569.6	OTULINL	-1.04414	0.00466648	1.01673	0.000467768
ENSG00000083720.13	OXCT1	1.14609	0.0342587	-1.55309	0.000103589
ENSG00000171631.14	P2RY6	1.34146	0.0312744	-1.36023	0.00126875
ENSG00000124374.9	PAIP2B	-2.04595	0.00164472	-1.63487	0.000204041
ENSG00000107719.9	PALD1	-1.53407	0.0130191	-2.52568	4.45006e-06
ENSG00000099260.11	PALMD	1.28171	0.000933123	1.07342	0.00266582
ENSG00000182752.10	PAPPA	-1.32298	0.00326026	1.57506	7.52178e-05
ENSG00000198682.13	PAPSS2	-1.10093	0.0191859	-1.64544	0.000496685
ENSG00000152931.7	PART1	1.1056	0.0200936	-1.58995	1.38414e-09
ENSG00000186472.20	PCLO	-1.51974	0.000604588	1.86521	1.04726e-06
ENSG00000169174.10	PCSK9	-1.47487	0.00127689	-2.89238	1.1145e-22
ENSG00000128655.18	PDE11A	2.7632	1.53141e-05	-1.72353	9.39241e-06
ENSG00000186642.16	PDE2A	-1.81253	0.0232794	2.16603	1.35239e-08
ENSG00000113721.14	PDGFRB	1.37595	0.00349487	-3.10611	9.74827e-27
ENSG00000282164.3	PEG13	1.8212	9.27452e-05	-1.35845	2.33794e-06
ENSG00000119630.14	PGF	-1.65857	0.00149737	2.84206	7.63618e-24
ENSG00000153823.18	PID1	-2.14916	0.00830569	2.81397	5.10949e-10
ENSG00000137193.14	PIM1	2.48465	9.68349e-06	-1.26917	1.78842e-05
ENSG00000107242.18	PIP5K1B	1.94926	0.0125191	-1.49898	6.42797e-07
ENSG00000197181.12	PIWIL2	2.76091	0.00136205	-2.3831	2.02037e-07
ENSG00000168734.14	PKIG	1.00201	0.00167606	-1.31746	2.81709e-05
ENSG00000143627.19	PKLR	1.85167	0.00033381	-2.24034	2.24962e-08
ENSG00000138308.5	PLA2G12B	1.14967	0.0126768	-2.88183	8.16951e-15
ENSG00000188257.11	PLA2G2A	3.36184	0.00138179	1.1245	0.000199901
ENSG00000105499.14	PLA2G4C	-1.10579	0.00375752	-2.41036	1.08995e-12
ENSG00000145287.10	PLAC8	1.90827	0.0434169	3.1369	2.67607e-31
ENSG00000011422.12	PLAUR	1.94584	0.00103281	-2.36714	1.24774e-05
ENSG00000187091.13	PLCD1	-1.21536	0.0339426	2.18168	6.33983e-13
ENSG00000149527.18	PLCH2	1.15163	0.0348473	-2.88971	2.31929e-10
ENSG00000154822.18	PLCL2	-1.65818	0.011183	5.37225	2.39657e-37
ENSG00000169499.15	PLEKHA2	1.5596	0.00374822	-1.11801	7.22178e-05
ENSG00000021300.14	PLEKHB1	1.05778	0.00186935	-2.22974	3.97398e-18
ENSG00000148123.15	PLPPR1	2.67654	0.0195394	-2.23401	5.16936e-14
ENSG00000129951.18	PLPPR3	-1.59615	0.0458785	5.13343	7.96387e-16
ENSG00000114698.15	PLSCR4	3.63768	0.0196098	-1.04992	0.0017427
ENSG00000161381.14	PLXDC1	-1.45259	0.0381766	2.82046	0.000196223
ENSG00000076356.7	PLXNA2	1.20226	0.0192417	1.09452	0.000164737
ENSG00000141682.11	PMAIP1	-1.12063	0.00204872	2.70079	4.95592e-21
ENSG00000132000.13	PODNL1	-1.81326	0.0205224	2.92613	0.00208656
ENSG00000185668.7	POU3F1	-2.6576	0.000455104	6.62499	2.79413e-27
ENSG00000132170.21	PPARG	2.21673	0.0229909	-1.31419	1.71229e-06
ENSG00000177380.14	PPFIA3	-1.4617	0.00314638	-1.35488	1.16817e-05
ENSG00000163590.14	PPM1L	-1.60058	0.00228158	-2.62272	3.23724e-15
ENSG00000173281.5	PPP1R3B	1.7311	0.00216986	-1.70377	0.0115744
ENSG00000163637.13	PRICKLE2	-1.78616	0.0214301	2.26361	7.17053e-09
ENSG00000167525.13	PROCA1	-1.20778	0.00767601	-1.4276	0.00466009
ENSG00000250799.9	PRODH2	2.26393	0.0128056	-3.15886	4.08472e-14
ENSG00000007062.11	PROM1	1.11634	0.00102606	-2.2885	2.0132e-17
ENSG00000155066.16	PROM2	-2.3329	0.0282416	3.81935	0.000105521
ENSG00000135362.14	PRR5L	-1.36408	0.0476838	2.04883	0.00212024
ENSG00000172460.16	PRSS30P	-1.72584	0.008176	4.02975	2.68964e-11
ENSG00000059915.17	PSD	-1.56202	0.0272942	-2.36603	0.00157133
ENSG00000185920.15	PTCH1	1.04228	0.00623031	-3.16009	3.89439e-26
ENSG00000100228.12	RAB36	1.27673	0.0171059	-2.27042	1.5518e-07
ENSG00000172794.20	RAB37	-1.20714	0.00890044	2.2204	1.94074e-11
ENSG00000188060.7	RAB42	1.0029	0.00189406	-1.28404	2.30484e-06
ENSG00000123570.4	RAB9B	1.5029	0.002298	-1.93242	6.25836e-05
ENSG00000116191.17	RALGPS2	1.153	0.021616	-1.29251	1.17637e-06
ENSG00000246695.7	RASSF8-AS1	-1.0616	0.0100243	-2.04381	0.000226005
ENSG00000112183.15	RBM24	1.58189	0.0012689	-1.83374	4.83109e-12
ENSG00000183688.4	RFLNB	-1.62801	0.00146861	-2.08821	4.96914e-09
ENSG00000203616.2	RHOT1P2	-2.03039	0.0313626	6.90433	1.3605e-09
ENSG00000101098.12	RIMS4	-1.01701	0.0460351	5.11165	2.62589e-62
ENSG00000165799.5	RNASE7	1.16198	0.0431021	2.58391	0.00265782
ENSG00000204618.8	RNF39	-1.04808	0.0264929	2.88061	2.77196e-15
ENSG00000206712.1	RNU6-26P	2.06228	0.0052876	1.25231	0.0120737
ENSG00000154133.14	ROBO4	1.38438	0.0441746	-1.436	7.48937e-05
ENSG00000243742.5	RPLP0P2	-1.00988	0.0270868	1.55607	0.00246467
ENSG00000124787.13	RPP40	1.2997	0.016022	-1.95753	7.37359e-12
ENSG00000242732.4	RTL5	-1.65294	0.0264726	3.73686	1.70984e-29
ENSG00000196218.12	RYR1	-1.72356	0.0197755	1.60334	0.00303162
ENSG00000267534.4	S1PR2	-1.39206	0.0195354	-1.47219	4.68647e-06
ENSG00000213694.5	S1PR3	-1.11015	0.0469972	3.5798	4.40758e-19
ENSG00000133812.15	SBF2	1.29619	0.00229633	2.6518	3.51173e-23
ENSG00000188322.5	SBK1	-1.34211	0.0472051	1.75661	8.27896e-07
ENSG00000231274.5	SBK3	1.16241	0.0260191	-1.81087	0.00106973
ENSG00000168077.14	SCARA3	-1.42715	0.00409997	-5.26768	2.76632e-46
ENSG00000079689.14	SCGN	1.41481	0.0232979	-5.86048	1.27509e-49
ENSG00000166257.8	SCN3B	-2.14016	0.00644777	5.16923	1.90967e-25
ENSG00000177098.8	SCN4B	-1.35581	0.0381325	3.46526	8.93188e-14
ENSG00000281501.1	SEPSECS-AS1	1.34515	0.0148237	-1.38122	0.000262305
ENSG00000108387.14	SEPT4	-1.11477	0.0403332	1.73425	9.57429e-06
ENSG00000206075.14	SERPINB5	-1.35803	0.0458336	4.88037	2.80371e-20
ENSG00000117601.13	SERPINC1	1.40101	0.0304956	-1.93001	1.86577e-11
ENSG00000099937.11	SERPIND1	1.40912	0.0383989	-1.19963	2.6019e-06
ENSG00000149131.15	SERPING1	-1.19399	0.0361813	-1.56627	0.000695258
ENSG00000149212.11	SESN3	-1.82654	4.46806e-05	-2.61577	1.48559e-22
ENSG00000106483.12	SFRP4	-1.14815	0.00191345	1.1321	0.000898491
ENSG00000118515.11	SGK1	1.47809	0.001296	-1.87957	1.18613e-13
ENSG00000156463.18	SH3RF2	1.04011	0.010293	-2.45223	6.68039e-11
ENSG00000180592.16	SKIDA1	-1.30235	0.0461543	-1.9013	0.00775312
ENSG00000145604.15	SKP2	1.16725	0.00729922	-2.41299	1.83788e-20
ENSG00000253598.1	SLC10A5	2.56596	0.00475784	-1.61466	0.000375466
ENSG00000124568.10	SLC17A1	1.70047	0.0403914	-3.39568	0.000194061
ENSG00000197847.12	SLC22A20P	-1.28621	0.00856157	2.59594	0.000903353
ENSG00000140090.17	SLC24A4	-1.17082	0.0335623	2.0676	0.00148632
ENSG00000115840.14	SLC25A12	1.57429	9.26141e-05	1.17537	0.000174965
ENSG00000227533.5	SLC2A1-AS1	2.77436	0.00130902	-1.32188	0.000127368
ENSG00000163581.14	SLC2A2	2.38231	0.0031387	-1.35293	4.06122e-07
ENSG00000169507.9	SLC38A11	1.43375	0.012809	-2.40535	3.24221e-15
ENSG00000104635.14	SLC39A14	1.29632	0.00100328	-1.8894	4.52274e-14
ENSG00000139540.12	SLC39A5	1.60743	0.000523683	-1.32982	0.000399109
ENSG00000088836.13	SLC4A11	1.85599	0.0154686	2.42757	2.94541e-16
ENSG00000158865.12	SLC5A11	2.82368	0.000373286	-2.15744	0.00354706
ENSG00000105641.4	SLC5A5	-3.2555	0.00291974	3.03791	0.000442404
ENSG00000174358.16	SLC6A19	3.69824	0.0149333	-4.12875	5.97035e-05
ENSG00000108576.10	SLC6A4	2.36548	0.000170734	-3.33306	7.62771e-24
ENSG00000066230.11	SLC9A3	-1.45549	0.0205406	2.52039	0.00331791
ENSG00000225138.7	SLC9A3-AS1	-1.38423	0.00287346	1.29206	0.00380792
ENSG00000164038.15	SLC9B2	1.21399	0.0334074	-1.09727	5.52213e-05
ENSG00000137491.14	SLCO2B1	1.83573	0.000507234	-1.12614	0.00129796
ENSG00000172123.12	SLFN12	-2.66271	0.0367116	-3.83791	0.000423931
ENSG00000198732.10	SMOC1	1.0115	0.0170869	-1.59068	7.80364e-07
ENSG00000124216.4	SNAI1	-1.57876	0.0011658	-1.57996	2.30038e-05
ENSG00000185669.6	SNAI3	-1.14325	0.0434556	5.94325	1.38786e-23
ENSG00000162804.14	SNED1	-1.38676	0.0284813	2.73658	1.13563e-09
ENSG00000207442.1	SNORD116-6	2.31115	0.017715	-1.83775	0.000405753
ENSG00000230965.1	SNX18P13	-2.60156	0.0152864	7.76613	2.09108e-06
ENSG00000167780.12	SOAT2	1.45541	0.00334086	-3.36388	2.28474e-29
ENSG00000137642.13	SORL1	1.41077	0.00312506	2.00005	9.39121e-17
ENSG00000189120.5	SP6	-1.21094	0.029202	3.10717	3.39476e-13
ENSG00000113140.11	SPARC	-1.0971	0.00110328	1.78194	1.76391e-09
ENSG00000164266.10	SPINK1	5.90977	1.33806e-06	-2.81913	0.000146785
ENSG00000182557.8	SPNS3	-1.4951	0.0237795	4.27864	1.41739e-09
ENSG00000172296.13	SPTLC3	2.34214	0.0013309	-3.45771	9.81879e-37
ENSG00000137767.14	SQOR	1.50692	6.20289e-05	1.55788	9.13319e-07
ENSG00000145545.12	SRD5A1	-1.07386	0.000725466	-1.48334	4.50052e-09
ENSG00000196220.16	SRGAP3	-1.47822	0.0172362	4.10901	5.45289e-42
ENSG00000102359.7	SRPX2	2.17399	0.000107517	-1.45157	9.62322e-05
ENSG00000138134.12	STAMBPL1	2.6435	0.00120434	-2.3413	0.00389517
ENSG00000172345.14	STARD5	-1.16171	0.0194754	2.62401	5.04431e-12
ENSG00000136854.21	STXBP1	-1.32192	0.00855225	-1.22163	4.81999e-05
ENSG00000196562.14	SULF2	-1.15197	0.0350978	7.79483	3.16344e-189
ENSG00000198168.9	SVIP	1.17313	0.0332158	-2.23684	1.78135e-16
ENSG00000103528.17	SYT17	-1.09332	0.0106312	1.16557	0.0071231
ENSG00000102362.15	SYTL4	1.37928	0.0119883	-1.56996	0.000226083
ENSG00000198650.11	TAT	2.20455	0.00541166	-1.70445	8.56045e-06
ENSG00000101849.16	TBL1X	1.00223	0.000923824	-1.19073	1.84042e-05
ENSG00000092607.15	TBX15	-1.53522	0.000317586	5.26262	3.83787e-28
ENSG00000176907.4	TCIM	1.27394	0.0307281	-1.21017	6.54983e-06
ENSG00000166046.11	TCP11L2	1.15957	0.00117936	2.6422	2.41415e-23
ENSG00000158246.8	TENT5B	-1.51296	0.00970169	-1.21091	0.00928926
ENSG00000088992.18	TESC	1.07706	0.00085651	-1.00398	0.000572182
ENSG00000198959.12	TGM2	1.21992	0.0228917	-1.22862	8.93526e-06
ENSG00000129028.9	THAP10	-1.36348	0.00161389	-1.13322	0.00230126
ENSG00000223573.7	TINCR	-1.72158	0.042249	5.23825	2.3359e-31
ENSG00000119139.19	TJP2	1.08826	0.000638945	-1.00817	0.000112015
ENSG00000160606.11	TLCD1	-1.16409	0.00511695	1.24606	1.64354e-05
ENSG00000179292.5	TMEM151A	-1.33106	0.0121205	-1.45954	0.00648057
ENSG00000249992.1	TMEM158	-2.94674	0.000131	-2.19536	0.00790572
ENSG00000253304.2	TMEM200B	-1.68564	0.000689616	-1.6658	4.59138e-06
ENSG00000105518.14	TMEM205	1.17996	0.00172358	-1.17691	0.000153024
ENSG00000187824.8	TMEM220	1.21809	0.019966	-2.03398	0.000176186
ENSG00000072954.7	TMEM38A	-1.01846	0.0248654	-1.30966	8.07699e-05
ENSG00000178821.13	TMEM52	-1.44344	0.00110815	2.02558	1.82593e-09
ENSG00000137842.7	TMEM62	1.48574	0.0178885	-1.14704	0.000202908
ENSG00000133687.16	TMTC1	1.29693	0.00557629	-1.03514	0.00407268
ENSG00000118503.15	TNFAIP3	1.39286	0.000392883	-2.22902	7.68838e-15
ENSG00000159958.6	TNFRSF13C	-1.45389	0.0210968	-1.66979	4.42583e-05
ENSG00000121858.11	TNFSF10	1.72384	0.00244488	1.44515	0.000191052
ENSG00000131746.13	TNS4	1.09469	0.0183088	-1.15328	6.68597e-06
ENSG00000204613.11	TRIM10	1.03716	0.00495195	-2.13074	1.46874e-12
ENSG00000204610.13	TRIM15	1.40117	0.000204297	-1.50815	1.18729e-06
ENSG00000137699.17	TRIM29	-1.69873	0.0205036	1.69707	6.14285e-05
ENSG00000204616.11	TRIM31	2.13485	0.00453964	-2.41603	0.000953408
ENSG00000147573.17	TRIM55	-2.61044	0.000856133	3.26883	0.000110659
ENSG00000158022.6	TRIM63	-1.51951	0.0383536	5.63988	4.33037e-06
ENSG00000198860.12	TSEN15	1.31705	0.00760292	-1.30724	1.9166e-05
ENSG00000110900.15	TSPAN11	-1.76636	0.012014	8.26705	7.51087e-26
ENSG00000157570.11	TSPAN18	-2.1916	0.0300297	4.71435	3.99188e-23
ENSG00000085831.15	TTC39A	2.07368	0.000186848	-1.31562	0.000661124
ENSG00000137941.17	TTLL7	1.37001	0.0448694	-1.84567	0.000316087
ENSG00000137561.4	TTPA	1.39115	0.00450418	-1.46158	0.00168598
ENSG00000118271.10	TTR	3.2911	8.387e-05	-1.99142	2.17079e-13
ENSG00000127824.14	TUBA4A	1.49176	0.0012254	-2.18883	1.34945e-12
ENSG00000272462.2	U91328.1	1.15568	0.00521965	-1.27613	0.000859987
ENSG00000156096.14	UGT2B4	-2.08014	0.0289494	-3.88327	8.23136e-14
ENSG00000143494.15	VASH2	1.2086	0.00707795	-1.22624	0.0025114
ENSG00000128564.7	VGF	-1.22555	0.00648112	-1.77817	0.0034998
ENSG00000176428.6	VPS37D	-1.07403	0.0155067	1.92866	3.29545e-06
ENSG00000110002.15	VWA5A	2.04344	0.00196088	-2.13763	0.00023185
ENSG00000127578.7	WFIKKN1	-1.47054	0.0443488	1.85612	4.02623e-05
ENSG00000095397.14	WHRN	-1.18646	0.017142	3.55207	9.99499e-28
ENSG00000126562.17	WNK4	1.80446	1.93148e-05	-2.23552	7.91968e-15
ENSG00000108379.10	WNT3	-1.30247	0.000553288	-1.05856	9.42474e-05
ENSG00000143816.8	WNT9A	-1.85405	0.0354062	4.58185	2.13399e-20
ENSG00000186919.12	ZACN	-1.26605	0.0150137	2.25064	0.00268904
ENSG00000178199.13	ZC3H12D	1.08386	0.0178993	-1.74261	5.2078e-07
ENSG00000177108.5	ZDHHC22	-1.69078	0.0338915	2.39196	0.00135916
ENSG00000151789.12	ZNF385D	-1.48918	0.0292921	3.305	5.01357e-05
ENSG00000102935.11	ZNF423	-1.21276	0.0166513	5.08684	2.36461e-42
ENSG00000204947.9	ZNF425	-1.24833	0.00312338	1.95518	1.61356e-07
ENSG00000181444.13	ZNF467	-1.76961	0.0245117	3.66338	0.00108462

## Sheet: 1211 TP53LC04 dependent genes
gene	genename	log2FoldChange (sh-TP53LC04-1-ADR+ vs sh-LacZ-ADR+)	pvalue (sh-TP53LC04-1-ADR+ vs sh-LacZ-ADR+)
ENSG00000240409.1	MTATP8P1	1.44181	0.0404696
ENSG00000272512.1	AL645608.7	-1.44017	0.034928
ENSG00000217801.10	AL390719.1	1.05356	0.0263315
ENSG00000269978.1	AL359881.1	-1.19536	0.0144249
ENSG00000188807.13	TMEM201	-1.19472	0.018226
ENSG00000204624.8	DISP3	-2.27367	0.00852446
ENSG00000235643.1	LINC01647	-3.26939	0.000303337
ENSG00000175147.12	TMEM51-AS1	1.36824	0.0184361
ENSG00000237301.1	AL121992.1	-1.61698	0.0347483
ENSG00000173641.17	HSPB7	-1.85116	0.0237906
ENSG00000009709.12	PAX7	-3.4628	0.0176368
ENSG00000227001.3	NBPF2P	-1.36779	0.00359592
ENSG00000133216.16	EPHB2	-2.18076	0.00241889
ENSG00000236810.5	ELOA-AS1	1.323	0.00960766
ENSG00000162430.17	SELENON	-1.14634	0.0375846
ENSG00000090020.11	SLC9A1	-1.2004	0.0084668
ENSG00000174950.11	CD164L2	-2.10772	0.0345106
ENSG00000084628.10	NKAIN1	-1.24756	0.0424001
ENSG00000121769.7	FABP3	-1.27827	0.0167117
ENSG00000134668.12	SPOCD1	-1.80105	0.0475481
ENSG00000160097.18	FNDC5	-1.95135	0.00852512
ENSG00000142920.17	AZIN2	-1.57085	0.00224642
ENSG00000116544.12	DLGAP3	-1.68871	0.0308826
ENSG00000232273.1	FTH1P1	2.02546	0.0477186
ENSG00000116983.13	HPCAL4	-3.87275	0.0251734
ENSG00000117010.17	ZNF684	1.06381	0.00284906
ENSG00000186409.16	CCDC30	-1.30745	0.0208806
ENSG00000117394.21	SLC2A1	2.22889	0.000272653
ENSG00000117407.17	ARTN	-1.71703	0.0189588
ENSG00000196517.11	SLC6A9	-1.9574	0.00538218
ENSG00000230615.6	AL139220.2	-2.46707	6.3632e-05
ENSG00000225721.5	AL592166.1	-2.44647	0.0395126
ENSG00000117461.15	PIK3R3	-1.25891	0.0140459
ENSG00000085999.12	RAD54L	-1.0643	0.00279958
ENSG00000162456.9	KNCN	-2.70445	0.0489533
ENSG00000186564.5	FOXD2	-1.17248	0.0147549
ENSG00000279096.2	AL356289.3	-4.87627	0.0313888
ENSG00000117834.12	SLC5A9	1.2236	0.00215394
ENSG00000157077.14	ZFYVE9	1.37623	0.00579694
ENSG00000226754.1	AL606760.1	1.62498	0.0309325
ENSG00000223956.2	LINC01767	2.37714	0.00319706
ENSG00000021852.13	C8B	2.28157	0.0334227
ENSG00000234264.1	DEPDC1-AS1	-2.43674	0.00418632
ENSG00000226088.1	AL158839.1	-2.3827	0.0270513
ENSG00000137960.6	GIPC2	1.31621	0.00523315
ENSG00000117226.12	GBP3	2.8959	1.59868e-05
ENSG00000162645.13	GBP2	2.73763	7.42188e-05
ENSG00000226835.2	AC097059.1	1.8552	0.0237645
ENSG00000172339.10	ALG14	1.01645	0.00653364
ENSG00000156869.13	FRRS1	1.49151	0.0204335
ENSG00000162631.18	NTNG1	-2.30188	0.0185616
ENSG00000215717.6	TMEM167B	1.06598	0.0144903
ENSG00000197106.7	SLC6A17	-1.7044	0.0498894
ENSG00000224965.1	LINC02586	-1.70563	0.0347186
ENSG00000177301.15	KCNA2	-2.4425	0.0162927
ENSG00000260948.1	AL390195.2	-1.35377	0.0128487
ENSG00000243960.1	AL390195.1	-1.7843	0.00891436
ENSG00000231346.5	LINC01160	-1.94589	0.0184874
ENSG00000173212.4	MAB21L3	1.27618	0.00348255
ENSG00000221040.2	RF00012	-1.73949	0.0330442
ENSG00000177173.5	NAP1L4P1	1.43118	0.000948197
ENSG00000143061.17	IGSF3	-1.80485	0.00779024
ENSG00000134240.11	HMGCS2	-1.40866	0.0399216
ENSG00000232527.7	AC245595.1	2.89596	0.022443
ENSG00000143127.13	ITGA10	1.80793	0.00746889
ENSG00000211451.12	GNRHR2	1.91285	0.00388106
ENSG00000201558.1	RNVU1-6	-2.1471	0.0239544
ENSG00000277406.2	SEC22B4P	2.16982	0.0468043
ENSG00000237188.5	AC242426.2	1.99092	0.0267801
ENSG00000162836.12	ACP6	1.06708	0.00122956
ENSG00000177144.7	NUDT4B	-3.75728	0.00446507
ENSG00000270276.2	HIST2H4B	2.67276	0.00141759
ENSG00000213190.3	MLLT11	2.65694	8.06502e-06
ENSG00000188643.11	S100A16	1.28687	0.000488437
ENSG00000160712.13	IL6R	1.19576	0.000719068
ENSG00000163239.12	TDRD10	-2.62625	0.0409948
ENSG00000272068.1	AL365181.2	1.28214	0.0110042
ENSG00000143320.9	CRABP2	-1.1903	0.0472467
ENSG00000224520.2	KRT8P45	-1.56617	0.01158
ENSG00000183853.18	KIRREL1	-2.18352	0.00545001
ENSG00000171786.6	NHLH1	-2.18371	0.00388885
ENSG00000270149.5	AL591806.3	-1.62572	0.0198434
ENSG00000162745.10	OLFML2B	-2.44935	0.0285972
ENSG00000188859.6	FAM78B	-1.71654	0.0366855
ENSG00000272205.1	AL451050.2	-1.95483	0.0127309
ENSG00000198821.10	CD247	-2.27336	0.00379039
ENSG00000116132.12	PRRX1	-2.13	0.0378202
ENSG00000180999.11	C1orf105	1.7518	0.00681806
ENSG00000152092.16	ASTN1	-2.17226	0.0346266
ENSG00000254154.8	CRYZL2P-SEC16B	1.56567	0.0150553
ENSG00000242193.11	CRYZL2P	2.09342	0.00020614
ENSG00000135828.11	RNASEL	1.62007	0.00439531
ENSG00000116741.8	RGS2	1.62196	0.0371598
ENSG00000174502.19	SLC26A9	2.77525	0.000223581
ENSG00000182795.13	C1orf116	1.1799	0.0189921
ENSG00000123843.13	C4BPB	1.79794	0.000112152
ENSG00000123838.11	C4BPA	2.16388	0.00102986
ENSG00000196352.15	CD55	1.38156	0.00844083
ENSG00000117691.10	NENF	-1.15207	0.018157
ENSG00000143353.12	LYPLAL1	1.05216	0.00553365
ENSG00000277007.1	AC096642.1	1.17948	0.0379934
ENSG00000228536.2	LYPLAL1-AS1	3.33057	0.00272311
ENSG00000143768.13	LEFTY2	-1.60479	0.00942151
ENSG00000185155.11	MIXL1	2.42622	0.000488366
ENSG00000154342.6	WNT3A	-3.67673	0.00569583
ENSG00000143632.14	ACTA1	-2.39482	0.00162454
ENSG00000177614.11	PGBD5	-1.98904	0.0212986
ENSG00000119283.15	TRIM67	-2.00753	0.00833302
ENSG00000135749.19	PCNX2	-1.25846	0.00691239
ENSG00000279261.2	AL360294.1	1.25465	0.0187994
ENSG00000116977.18	LGALS8	1.46895	0.00199898
ENSG00000223776.5	LGALS8-AS1	1.08567	0.00622385
ENSG00000230325.1	AL359921.1	2.1042	0.0156503
ENSG00000135747.11	ZNF670-ZNF695	-2.87679	0.0130274
ENSG00000215795.2	AL390728.2	-3.61872	0.00672309
ENSG00000189292.16	ALKAL2	1.22285	0.00323925
ENSG00000236760.1	AC019118.2	1.87699	0.0384674
ENSG00000223884.6	AC068481.1	-1.6252	0.0344706
ENSG00000143797.12	MBOAT2	-1.66909	0.010718
ENSG00000151693.11	ASAP2	1.0161	0.00166943
ENSG00000272275.1	AC092687.3	-2.21309	0.00600664
ENSG00000163032.11	VSNL1	1.40414	0.0156237
ENSG00000227210.1	AC079145.1	1.56377	0.00405819
ENSG00000234378.1	AC098828.3	2.87956	0.0300187
ENSG00000261012.2	AC115619.1	1.84246	0.00167901
ENSG00000119771.15	KLHL29	-2.53111	0.00187605
ENSG00000084710.14	EFR3B	-1.47804	0.00889303
ENSG00000115138.11	POMC	-2.64347	0.0350317
ENSG00000157851.17	DPYSL5	-2.54716	0.00515979
ENSG00000229122.1	AGBL5-IT1	-1.59923	0.00587696
ENSG00000138002.15	IFT172	1.23125	0.00316167
ENSG00000189350.12	TOGARAM2	-1.91935	0.0476131
ENSG00000213626.13	LBH	-1.9041	0.0210535
ENSG00000018699.13	TTC27	1.11629	0.00595591
ENSG00000049323.16	LTBP1	-1.32423	0.0405103
ENSG00000205111.8	CDKL4	1.5239	0.033102
ENSG00000152154.11	TMEM178A	1.61713	0.012098
ENSG00000143924.19	EML4	1.13162	0.031788
ENSG00000226087.1	AC073283.2	-2.20539	0.0196339
ENSG00000184261.4	KCNK12	-1.96759	0.0216646
ENSG00000214595.11	EML6	-1.24685	0.00101936
ENSG00000237522.1	NONOP2	1.48531	0.00496693
ENSG00000162927.14	PUS10	1.67744	0.0131987
ENSG00000143952.20	VPS54	1.07416	0.0407468
ENSG00000223935.2	LGALSL-DT	-1.70239	0.0176211
ENSG00000260101.1	AC008074.2	1.64307	0.00512599
ENSG00000115956.10	PLEK	-1.66161	0.0113012
ENSG00000244617.2	ASPRV1	-1.74353	0.0044505
ENSG00000144191.11	CNGA3	-1.7267	0.0141677
ENSG00000272902.2	TBC1D8-AS1	1.05431	0.0384658
ENSG00000175701.10	MTLN	1.06214	0.015408
ENSG00000153093.18	ACOXL	-1.41688	0.0386313
ENSG00000204581.2	ACOXL-AS1	-1.53557	0.0287301
ENSG00000144152.13	FBLN7	-2.52856	0.00462141
ENSG00000278962.1	AC092645.1	-2.83541	0.00415782
ENSG00000136689.18	IL1RN	1.08288	0.0017126
ENSG00000227359.1	AC017074.1	-1.06179	0.0137179
ENSG00000236255.1	AC009404.1	-1.13207	0.0190601
ENSG00000125629.15	INSIG2	1.70062	0.0372418
ENSG00000163075.13	CFAP221	-1.98893	0.0248358
ENSG00000152076.18	CCDC74B	-1.24056	0.0182063
ENSG00000150540.14	HNMT	1.12372	0.0170061
ENSG00000230569.1	AC114763.2	-2.82885	0.00317339
ENSG00000168280.17	KIF5C	-1.81232	0.0025071
ENSG00000187123.15	LYPD6	-2.27831	0.00577042
ENSG00000115963.13	RND3	-1.77452	0.0133338
ENSG00000144278.15	GALNT13	-1.75813	0.00323817
ENSG00000123612.16	ACVR1C	-1.41361	0.014654
ENSG00000271924.1	RNA5SP108	1.64792	0.0442891
ENSG00000197635.10	DPP4	1.61941	0.000552697
ENSG00000184611.11	KCNH7	-1.64717	0.0168265
ENSG00000115339.13	GALNT3	1.29129	0.0238454
ENSG00000236107.9	SCN1A-AS1	1.00992	0.0353953
ENSG00000144285.19	SCN1A	1.48836	0.0200273
ENSG00000207744.1	MIR10B	-3.03389	0.025408
ENSG00000230552.5	AC092162.2	-2.1511	0.0460861
ENSG00000278418.1	MIR6512	-3.0439	0.016605
ENSG00000144331.20	ZNF385B	1.11616	0.0192048
ENSG00000170396.8	ZNF804A	2.00475	0.00392857
ENSG00000237877.6	LINC01473	2.0372	0.0082286
ENSG00000270757.1	HSPE1-MOB4	-2.39738	0.0387501
ENSG00000237166.1	LINC01792	-1.84392	0.0354633
ENSG00000230799.1	AC007279.1	1.67131	0.0240253
ENSG00000228577.1	AC010731.2	-2.45147	0.0147293
ENSG00000115361.8	ACADL	-3.02509	0.0151811
ENSG00000284820.1	AC068946.2	-1.08728	0.0205603
ENSG00000163286.9	ALPG	-3.28159	0.00181531
ENSG00000066248.15	NGEF	1.65672	0.000434898
ENSG00000243135.6	UGT1A3	2.35696	0.000690969
ENSG00000241635.7	UGT1A1	2.10504	0.00166428
ENSG00000144481.17	TRPM8	-2.04632	0.0175715
ENSG00000234949.2	AC104667.2	1.48422	0.0109996
ENSG00000178752.16	ERFE	-1.90507	0.0187674
ENSG00000144485.11	HES6	-1.19356	0.0188763
ENSG00000218416.4	AC110619.1	-1.23224	0.0394649
ENSG00000172478.18	MAB21L4	-1.78266	0.0173294
ENSG00000273113.1	AC133528.1	-3.16344	0.0203037
ENSG00000125046.14	SSUH2	1.07087	0.00297606
ENSG00000187288.10	CIDEC	3.93791	6.85137e-05
ENSG00000264534.3	MIR378B	-3.01724	0.0348009
ENSG00000283392.1	AC090952.2	-3.13599	0.0304143
ENSG00000230524.8	COL6A4P1	-1.15577	0.0278497
ENSG00000272529.1	AC090948.3	1.46895	0.0425878
ENSG00000274840.4	AC132807.2	2.51566	0.0468717
ENSG00000144677.15	CTDSPL	1.15083	0.00187881
ENSG00000168356.11	SCN11A	-1.48775	0.00739306
ENSG00000283849.1	AC092053.2	-2.50895	0.000306163
ENSG00000280739.2	EIF1B-AS1	1.18933	0.0484284
ENSG00000180432.5	CYP8B1	1.69885	0.00150272
ENSG00000114646.10	CSPG5	-1.97366	0.016671
ENSG00000179564.4	LSMEM2	1.74234	0.0352558
ENSG00000007402.11	CACNA2D2	-1.80181	0.0175986
ENSG00000010327.10	STAB1	-1.25136	0.0192373
ENSG00000162267.12	ITIH3	2.87457	0.00247225
ENSG00000271916.1	AC012467.1	2.13514	0.00687765
ENSG00000189283.10	FHIT	1.03493	0.0442778
ENSG00000270059.1	AC121493.1	1.48001	0.0390863
ENSG00000272610.1	MAGI1-IT1	1.24145	0.00707812
ENSG00000121440.15	PDZRN3	-1.95148	0.00609702
ENSG00000185008.17	ROBO2	-2.16118	0.0258019
ENSG00000064225.12	ST3GAL6	1.36496	0.0014321
ENSG00000057019.16	DCBLD2	1.13431	0.000898678
ENSG00000239462.1	AC091212.1	2.52544	0.00623659
ENSG00000240476.1	LINC00973	2.13245	1.22528e-05
ENSG00000168386.18	FILIP1L	1.45123	0.0274534
ENSG00000114391.13	RPL24	1.22892	0.0295599
ENSG00000244119.1	PDCL3P4	-1.70422	0.0182646
ENSG00000241634.1	AC069499.1	-1.65914	0.0489458
ENSG00000206532.2	AC117402.1	1.4877	0.000237399
ENSG00000242242.5	NECTIN3-AS1	1.21915	0.0182417
ENSG00000241889.1	AC079944.2	-2.35332	0.0259794
ENSG00000031081.10	ARHGAP31	-1.36814	0.0312329
ENSG00000144852.17	NR1I2	1.17555	0.000209729
ENSG00000163430.12	FSTL1	-1.24517	0.0148999
ENSG00000173175.14	ADCY5	-1.63411	0.0191566
ENSG00000221955.10	SLC12A8	-1.03394	0.040127
ENSG00000229048.5	DUTP1	-2.34166	0.0251108
ENSG00000246022.2	ALDH1L1-AS2	-1.76078	0.00221641
ENSG00000261159.1	AC112484.3	-2.12092	0.0365692
ENSG00000231305.3	AC112484.1	-1.19309	0.0297538
ENSG00000114654.7	EFCC1	1.27682	0.0326873
ENSG00000181789.14	COPG1	1.28277	0.000151817
ENSG00000163914.4	RHO	1.26582	0.0314042
ENSG00000203644.3	AC083799.1	1.06806	0.0103726
ENSG00000271270.6	TMCC1-AS1	1.13394	0.0360517
ENSG00000206384.10	COL6A6	-1.23389	0.0150451
ENSG00000154917.11	RAB6B	-1.17953	0.0160229
ENSG00000174564.13	IL20RB	2.07148	0.0190448
ENSG00000120756.13	PLS1	1.19384	0.0221756
ENSG00000018408.14	WWTR1	1.00688	0.00259272
ENSG00000070087.14	PFN2	1.01257	0.00198555
ENSG00000244265.1	SIAH2-AS1	-1.1721	0.0019475
ENSG00000152601.17	MBNL1	1.08455	0.00784216
ENSG00000244268.1	AC117394.2	-1.09518	0.00563294
ENSG00000243629.1	LINC00880	1.26922	0.0439767
ENSG00000269984.1	AC078795.1	-1.08505	0.039212
ENSG00000173890.17	GPR160	1.3419	0.0207156
ENSG00000199488.1	RNU1-70P	2.69793	0.0025459
ENSG00000058056.9	USP13	1.08958	0.0143313
ENSG00000090539.15	CHRD	-1.26307	0.00387715
ENSG00000163898.10	LIPH	2.27034	0.00201316
ENSG00000171658.8	NMRAL2P	1.90003	0.000811121
ENSG00000127241.16	MASP1	1.3192	0.0146458
ENSG00000136514.3	RTP4	1.4231	0.0423906
ENSG00000276407.4	AC024559.2	-2.50526	0.00879902
ENSG00000184203.8	PPP1R2	1.19664	0.0208786
ENSG00000189058.9	APOD	1.63998	0.0124831
ENSG00000224769.1	MUC20P1	-2.72371	0.0129409
ENSG00000176945.17	MUC20	-1.67066	0.00256577
ENSG00000260261.2	AC124944.3	-1.16474	0.00533675
ENSG00000225822.4	UBXN7-AS1	-2.14973	0.0404501
ENSG00000215375.6	MYL5	-1.12564	0.00191295
ENSG00000185818.7	NAT8L	-1.11013	0.0121308
ENSG00000247708.7	STX18-AS1	1.14958	0.00952433
ENSG00000173013.5	CCDC96	-1.02593	0.0188372
ENSG00000178597.7	PSAPL1	-1.4562	0.0335174
ENSG00000145147.20	SLIT2	-1.73516	0.000428654
ENSG00000109819.9	PPARGC1A	2.41052	0.00368148
ENSG00000109680.11	TBC1D19	1.31649	0.0156773
ENSG00000174145.8	NWD2	-1.51476	0.0346892
ENSG00000174130.12	TLR6	1.43829	0.00679051
ENSG00000154277.12	UCHL1	2.46257	0.000176407
ENSG00000249212.1	ATP1B1P1	-2.33058	0.0455813
ENSG00000109182.12	CWH43	-3.14618	0.0170654
ENSG00000188993.3	LRRC66	1.7513	0.0107095
ENSG00000251040.1	LINC02480	-3.16703	0.0275494
ENSG00000226887.8	ERVMER34-1	-1.34793	0.00229675
ENSG00000250919.1	UGT2B26P	-1.17419	0.0138287
ENSG00000250696.5	AC111000.4	-1.74445	0.00493732
ENSG00000213759.9	UGT2B11	-1.10333	0.00786052
ENSG00000173597.9	SULT1B1	1.91153	0.00225192
ENSG00000169435.14	RASSF6	-1.12314	0.0155237
ENSG00000138769.11	CDKL2	-1.90824	0.0280919
ENSG00000251442.5	LINC01094	2.32122	0.026317
ENSG00000145284.12	SCD5	-1.60956	0.0257324
ENSG00000138678.11	GPAT3	1.00953	0.0454804
ENSG00000118785.14	SPP1	1.6887	0.00166489
ENSG00000145335.15	SNCA	-1.69244	0.0230504
ENSG00000168743.12	NPNT	-1.18292	0.0020472
ENSG00000205403.13	CFI	1.27291	0.00140969
ENSG00000180245.5	RRH	-1.98313	0.0438656
ENSG00000183423.11	LRIT3	-2.21265	0.00614278
ENSG00000138798.12	EGF	4.76859	4.71553e-06
ENSG00000150961.15	SEC24D	1.00156	0.000700151
ENSG00000085871.9	MGST2	1.03005	0.0095965
ENSG00000170153.11	RNF150	-1.78488	0.019865
ENSG00000109452.12	INPP4B	-2.01041	0.0480429
ENSG00000251600.7	AC107223.1	1.79419	0.049652
ENSG00000151611.15	MMAA	1.27821	0.0326257
ENSG00000120519.14	SLC10A7	1.50186	0.00240486
ENSG00000170390.16	DCLK2	-1.89292	0.0252509
ENSG00000251611.1	FAM160A1-DT	2.77455	0.0215623
ENSG00000137462.7	TLR2	-1.3536	0.0424876
ENSG00000154447.15	SH3RF1	1.18721	0.000738756
ENSG00000248774.1	AC097534.1	-1.42221	0.0441277
ENSG00000249173.5	LINC01093	-3.24295	0.0186147
ENSG00000205129.8	C4orf47	-1.58333	0.00606598
ENSG00000154556.18	SORBS2	1.04255	0.0222092
ENSG00000109794.13	FAM149A	-1.47536	0.041954
ENSG00000250829.2	AC108865.1	2.50643	0.000222709
ENSG00000272218.1	AC108865.2	2.58494	0.000377872
ENSG00000249378.5	LINC01060	1.43009	0.032666
ENSG00000206077.11	ZDHHC11B	-1.52946	0.0368522
ENSG00000272347.1	AC116351.2	-2.40317	0.0286043
ENSG00000215217.7	C5orf49	-2.07028	0.000418253
ENSG00000145491.12	ROPN1L	-1.72964	0.00724886
ENSG00000198865.10	CCDC152	1.42394	0.00206228
ENSG00000250722.6	SELENOP	1.59147	0.00570353
ENSG00000272382.1	AC025171.5	-3.05077	0.017176
ENSG00000164171.11	ITGA2	1.50292	0.0109469
ENSG00000164509.14	IL31RA	-2.4159	0.0329191
ENSG00000113448.19	PDE4D	1.61798	0.0384407
ENSG00000268942.2	CKS1BP3	-1.52438	0.0163662
ENSG00000186479.4	RGS7BP	-2.54991	0.0341118
ENSG00000269961.1	AC010359.1	-1.9044	0.0222273
ENSG00000250387.2	LINC02197	-2.45193	0.0237737
ENSG00000251493.5	FOXD1	-1.25995	0.0351585
ENSG00000207336.1	RNU6-658P	2.54423	0.0454999
ENSG00000132837.14	DMGDH	1.93106	9.14351e-05
ENSG00000249042.5	AC008771.1	1.10279	0.021698
ENSG00000248323.6	LUCAT1	1.33833	0.0209788
ENSG00000249958.1	CCT7P2	1.86522	0.00499755
ENSG00000237187.8	NR2F1-AS1	1.13401	0.0230241
ENSG00000236882.7	LINC01554	-1.68926	0.0245751
ENSG00000133835.15	HSD17B4	1.1487	0.00847821
ENSG00000250328.5	AC022101.1	3.63765	0.00712631
ENSG00000155324.9	GRAMD2B	1.1282	0.00642413
ENSG00000164398.13	ACSL6	-1.10624	0.0282496
ENSG00000145826.9	LECT2	-1.36939	0.000640818
ENSG00000271824.1	SMIM32	-1.38918	0.0066769
ENSG00000272070.1	AC005618.1	1.58827	0.00612348
ENSG00000204956.5	PCDHGA1	1.97986	0.00585952
ENSG00000253910.2	PCDHGB2	1.06372	0.0440778
ENSG00000156475.18	PPP2R2B	-1.96603	0.0243364
ENSG00000145882.11	PCYOX1L	-1.92344	0.00146657
ENSG00000127743.6	IL17B	-1.79385	0.00201469
ENSG00000211445.12	GPX3	1.50522	0.000501024
ENSG00000253921.1	AC091982.1	-1.83832	0.0492976
ENSG00000113196.3	HAND1	-2.00228	0.00768698
ENSG00000221886.4	ZBED8	1.02892	0.0158923
ENSG00000156427.8	FGF18	-2.64591	0.00575436
ENSG00000113734.17	BNIP1	1.11407	0.0133416
ENSG00000253686.1	LINC01484	1.03116	0.00152404
ENSG00000254211.5	LINC01485	2.03358	0.0228566
ENSG00000113763.12	UNC5A	-2.85645	0.00481693
ENSG00000252464.1	RN7SKP70	1.59216	0.049366
ENSG00000131459.13	GFPT2	-1.64707	0.017682
ENSG00000161055.4	SCGB3A1	-1.3558	0.0323305
ENSG00000165810.17	BTNL9	-1.87823	0.0151983
ENSG00000145949.10	MYLK4	-1.05639	0.0462297
ENSG00000244041.7	LINC01011	1.79935	0.00900804
ENSG00000231811.2	AL159166.1	-3.14666	0.0131731
ENSG00000233503.1	HNRNPLP1	-3.03533	0.0339689
ENSG00000153162.9	BMP6	1.49551	0.00446615
ENSG00000111846.17	GCNT2	2.2349	2.17429e-05
ENSG00000285763.1	AL358777.1	-1.39048	0.017119
ENSG00000145990.11	GFOD1	-1.15683	0.0380897
ENSG00000235488.1	JARID2-AS1	-2.03373	0.0215593
ENSG00000137261.14	KIAA0319	2.59543	0.00355403
ENSG00000124564.17	SLC17A3	3.54441	0.00204782
ENSG00000180596.7	HIST1H2BC	1.32449	0.00482955
ENSG00000180573.9	HIST1H2AC	1.03519	0.0223363
ENSG00000186470.14	BTN3A2	1.26185	0.000972584
ENSG00000026950.17	BTN3A1	1.43394	0.00322457
ENSG00000196787.3	HIST1H2AG	-1.16816	0.00306379
ENSG00000124657.1	OR2B6	-1.37647	0.0427851
ENSG00000229390.1	MICD	1.70335	0.0368675
ENSG00000272501.1	AL662844.4	1.22399	0.00958525
ENSG00000204516.10	MICB	-1.30012	0.000187907
ENSG00000166278.15	C2	1.08789	0.0168843
ENSG00000243649.8	CFB	1.84349	0.00198962
ENSG00000204338.8	CYP21A1P	1.41205	0.00674597
ENSG00000196126.11	HLA-DRB1	-1.57536	0.0380676
ENSG00000112053.13	SLC26A8	1.08135	0.0274017
ENSG00000179165.11	PXT1	-1.6265	0.00229543
ENSG00000285888.1	Z85996.2	1.90716	0.0380907
ENSG00000164530.15	PI16	-1.7615	0.00447278
ENSG00000112139.16	MDGA1	-1.67406	0.012562
ENSG00000164627.18	KIF6	-1.72413	0.0465979
ENSG00000124593.16	AL365205.1	-1.19076	0.00687199
ENSG00000112599.9	GUCA1B	-1.46259	0.0173807
ENSG00000181524.6	RPL24P4	1.36026	0.016973
ENSG00000137204.14	SLC22A7	1.98038	0.0271895
ENSG00000204052.4	LRRC73	-1.67912	0.0171017
ENSG00000178233.17	TMEM151B	-2.03249	0.0261714
ENSG00000272442.2	AL353588.1	-1.84855	0.0162474
ENSG00000112782.17	CLIC5	-2.25584	0.00358927
ENSG00000172348.14	RCAN2	-2.60037	0.0466328
ENSG00000244067.3	GSTA2	-2.25739	0.000458046
ENSG00000236740.6	AL033384.1	2.75277	0.0258205
ENSG00000236345.1	SCAT8	-1.08964	0.0150585
ENSG00000119900.9	OGFRL1	-1.2938	0.000638618
ENSG00000119899.13	SLC17A5	1.15932	0.00189408
ENSG00000112706.12	IMPG1	-1.18166	0.0228736
ENSG00000118402.6	ELOVL4	-1.43591	0.00512731
ENSG00000154548.9	SRSF12	-1.34377	0.00699023
ENSG00000146267.12	FAXC	-1.76413	0.0311198
ENSG00000112246.9	SIM1	-2.55046	0.034182
ENSG00000112297.15	CRYBG1	1.11073	0.000434438
ENSG00000235142.9	LINC02532	2.78673	0.0096996
ENSG00000112333.11	NR2E1	-3.03896	0.0398014
ENSG00000249853.7	HS3ST5	1.57674	0.0246166
ENSG00000047936.10	ROS1	-1.34817	0.0220959
ENSG00000172594.13	SMPDL3A	2.03978	0.00309908
ENSG00000111907.21	TPD52L1	-1.34024	0.0352923
ENSG00000286215.1	AL356534.1	-1.09013	0.0363749
ENSG00000256162.2	SMLR1	1.41072	0.00128991
ENSG00000197594.13	ENPP1	1.22293	0.0169869
ENSG00000112299.8	VNN1	3.10652	1.73117e-05
ENSG00000231023.6	LINC00326	2.49924	0.00230287
ENSG00000118514.14	ALDH8A1	1.17416	0.00627764
ENSG00000231028.8	LINC00271	1.84905	0.00607005
ENSG00000135525.18	MAP7	-1.04238	0.0278422
ENSG00000278899.1	AL358852.1	-1.40692	0.0210525
ENSG00000111981.5	ULBP1	-2.12174	0.0199726
ENSG00000218358.2	RAET1K	-1.79912	0.00280812
ENSG00000074706.13	IPCEF1	-2.77911	0.0069959
ENSG00000146453.13	PNLDC1	-2.71978	0.00747377
ENSG00000112530.11	PACRG	-5.19704	0.00605002
ENSG00000112541.14	PDE10A	-1.48105	0.0370093
ENSG00000164488.12	DACT2	1.32875	0.0245752
ENSG00000198719.9	DLL1	-2.23325	0.00115554
ENSG00000002822.15	MAD1L1	-1.09338	0.0327696
ENSG00000106003.13	LFNG	-1.13161	0.00974166
ENSG00000231704.5	AC004895.1	-1.55811	0.0370487
ENSG00000228010.5	AC073343.2	-1.02715	0.0465337
ENSG00000226943.3	ALG1L5P	-2.0462	0.0432329
ENSG00000164651.16	SP8	-1.83231	0.0325284
ENSG00000136235.16	GPNMB	2.16363	0.00465297
ENSG00000197576.13	HOXA4	-1.40582	0.00383964
ENSG00000106006.6	HOXA6	1.06144	0.0421864
ENSG00000285162.1	AC004593.3	1.88546	0.0443862
ENSG00000227014.6	AC007285.1	1.02506	0.0245529
ENSG00000229358.3	DPY19L1P1	1.10666	0.00825449
ENSG00000271117.1	AC078841.1	-5.20685	0.0116469
ENSG00000106536.19	POU6F2	-2.36876	0.0491032
ENSG00000002746.15	HECW1	-1.62499	0.0205138
ENSG00000235314.1	LINC00957	1.75447	0.037125
ENSG00000228653.2	HNRNPCP7	2.05142	0.0374543
ENSG00000152926.14	ZNF117	1.05147	0.00774115
ENSG00000213462.5	ERV3-1	1.12978	0.00041388
ENSG00000275833.1	AC073107.2	-1.19173	0.0205912
ENSG00000158517.13	NCF1	-1.54293	0.0256658
ENSG00000230882.1	AC005077.4	1.60394	0.000402665
ENSG00000251798.1	RNU6-863P	3.32479	0.00384011
ENSG00000227038.3	GTF2IP7	1.52267	0.000461712
ENSG00000188372.15	ZP3	-1.45913	0.0388955
ENSG00000186704.9	DTX2P1	-3.04727	0.0375898
ENSG00000234456.7	MAGI2-AS3	1.30736	0.00585956
ENSG00000075213.11	SEMA3A	2.53131	0.0318285
ENSG00000058091.17	CDK14	-1.3651	0.037495
ENSG00000157240.3	FZD1	-1.36633	0.010631
ENSG00000177409.12	SAMD9L	1.51935	0.0353389
ENSG00000242265.5	PEG10	1.28284	0.00223925
ENSG00000279525.1	AC002451.2	3.63414	0.00338411
ENSG00000158560.14	DYNC1I1	1.70354	0.0154764
ENSG00000284707.1	AC079781.5	-1.69669	0.0435138
ENSG00000185467.7	KPNA7	1.30997	0.0134958
ENSG00000106351.13	AGFG2	1.70037	4.9608e-05
ENSG00000087077.14	TRIP6	-1.19231	0.0466419
ENSG00000169894.18	MUC3A	-1.61441	0.0262542
ENSG00000160963.14	COL26A1	-2.44177	0.0101259
ENSG00000244490.1	RWDD4P1	1.49318	0.039577
ENSG00000253276.3	CCDC71L	-1.88994	0.00454044
ENSG00000272072.1	AC004492.1	1.53024	0.0331632
ENSG00000091128.13	LAMB4	1.56145	0.00476402
ENSG00000184408.10	KCND2	-2.38469	0.0266549
ENSG00000196937.11	FAM3C	1.40128	0.024513
ENSG00000179603.17	GRM8	-1.34541	0.0497131
ENSG00000224940.8	PRRT4	-3.09303	0.00437886
ENSG00000272899.4	ATP6V1FNB	-1.93402	0.00167977
ENSG00000242078.1	AC084864.1	-3.36533	0.0110491
ENSG00000158516.12	CPA2	-2.62777	0.0152359
ENSG00000254270.1	ERHP1	-3.24749	0.015854
ENSG00000106123.12	EPHB6	-2.70782	0.000823762
ENSG00000178826.11	TMEM139	1.5076	0.00726635
ENSG00000213215.5	OR2F1	1.89988	0.0137633
ENSG00000199370.2	RF00012	2.44128	0.0179005
ENSG00000261305.2	AC005586.2	-1.46684	0.0468093
ENSG00000244151.1	AC010973.2	-1.44608	0.0299258
ENSG00000164900.4	GBX1	-2.41284	0.036833
ENSG00000130675.15	MNX1	-1.1516	0.00137091
ENSG00000155093.19	PTPRN2	2.84774	4.28224e-05
ENSG00000282021.1	AC100810.3	2.63271	0.00157937
ENSG00000164821.4	DEFA4	-3.23031	0.0192485
ENSG00000223629.1	DEFA8P	-3.34756	0.0100381
ENSG00000233238.1	DEFA9P	-2.46223	0.0456351
ENSG00000233531.1	DEFA10P	-2.8734	0.0175788
ENSG00000233609.3	RPL10P19	-1.91251	0.0261948
ENSG00000171044.10	XKR6	-1.6664	0.0276374
ENSG00000154319.16	FAM167A	-2.26365	0.048019
ENSG00000104723.20	TUSC3	3.0993	8.96641e-05
ENSG00000104760.17	FGL1	1.31563	0.0245812
ENSG00000254054.2	AC087273.2	1.33234	0.000941371
ENSG00000254064.1	AC105206.2	1.7751	0.034528
ENSG00000189233.12	NUGGC	2.3404	0.000415168
ENSG00000246339.5	EXTL3-AS1	-1.20083	0.0346825
ENSG00000156687.11	UNC5D	-5.61295	0.00237129
ENSG00000253361.2	AC069120.1	1.14063	0.00153463
ENSG00000147526.20	TACC1	1.27936	0.000100819
ENSG00000248531.3	NDUFA5P12	1.97659	0.0256104
ENSG00000196711.9	ALKAL1	-2.07115	0.0140414
ENSG00000228862.4	AC068389.1	-2.05533	0.0344309
ENSG00000198363.18	ASPH	1.2035	0.0017863
ENSG00000185697.16	MYBL1	-1.52592	0.000729995
ENSG00000104313.19	EYA1	-1.90869	0.0462341
ENSG00000154589.6	LY96	2.21935	0.000636686
ENSG00000121005.9	CRISPLD1	-2.13094	0.0408278
ENSG00000164683.17	HEY1	1.05398	0.0119908
ENSG00000076554.15	TPD52	1.36449	0.0062872
ENSG00000260317.1	AC009812.4	-2.31187	0.0195666
ENSG00000164879.7	CA3	1.37866	0.00637143
ENSG00000104267.10	CA2	-2.31179	5.66587e-05
ENSG00000132561.14	MATN2	-1.8076	0.00427116
ENSG00000104490.18	NCALD	-1.29906	0.0391014
ENSG00000283959.1	AP002851.1	-2.38618	0.0224431
ENSG00000147650.11	LRP12	-1.1021	0.00461235
ENSG00000251003.8	ZFPM2-AS1	1.93297	0.00333151
ENSG00000147642.17	SYBU	1.43843	0.00608792
ENSG00000172164.15	SNTB1	1.33405	0.00796506
ENSG00000170873.18	MTSS1	1.52817	0.000226959
ENSG00000254389.3	RHPN1-AS1	1.54882	0.0172008
ENSG00000255050.1	AC067930.4	-2.46221	0.000633603
ENSG00000261678.3	SCRT1	-1.99849	0.0307832
ENSG00000107077.18	KDM4C	1.06555	0.0258692
ENSG00000283647.1	AL512643.1	2.78209	0.045802
ENSG00000272842.1	AL391834.1	1.27011	0.0412539
ENSG00000227071.1	FOCAD-AS1	-1.15058	0.0313421
ENSG00000234840.1	LINC01239	1.33507	0.0407002
ENSG00000231991.4	ANXA2P2	1.76372	0.0154261
ENSG00000164976.9	MYORG	1.09515	0.0109978
ENSG00000205143.2	ARID3C	-1.95317	0.0351972
ENSG00000187186.14	AL162231.1	-1.75651	0.0119855
ENSG00000234160.1	AL513165.1	-1.99175	0.00179784
ENSG00000184906.11	AMYH02020865.1	2.40825	0.0292769
ENSG00000154529.14	CNTNAP3B	1.18432	0.00799242
ENSG00000236816.2	ANKRD20A7P	2.29337	0.00368828
ENSG00000170165.5	CR848007.1	2.42119	0.000500224
ENSG00000230635.2	CYP4F60P	1.33492	0.0476257
ENSG00000276591.1	GXYLT1P5	2.22152	0.0360816
ENSG00000186466.5	AQP7P1	1.14763	0.00926962
ENSG00000181997.8	AQP7P2	1.55496	0.0190233
ENSG00000280286.1	FRG1KP	-2.57325	0.0264582
ENSG00000235523.1	AL135924.2	5.27327	0.0359315
ENSG00000233926.1	AL591368.1	-3.37088	0.0260172
ENSG00000278988.1	AL356490.1	2.38419	0.008138
ENSG00000130958.13	SLC35D2	1.22179	0.00144925
ENSG00000136943.11	CTSV	-1.66905	8.91885e-05
ENSG00000228376.3	GAS2L1P2	-2.57329	0.0314146
ENSG00000106789.13	CORO2A	-1.04628	0.0116703
ENSG00000241697.5	TMEFF1	-2.76957	8.68467e-05
ENSG00000170681.6	CAVIN4	-2.76494	0.00515854
ENSG00000165124.18	SVEP1	-1.5883	0.0296144
ENSG00000228623.6	ZNF883	1.30131	0.0179956
ENSG00000138835.22	RGS3	1.14643	0.000856885
ENSG00000056558.11	TRAF1	-1.2412	0.00225127
ENSG00000185585.20	OLFML2A	-2.0668	0.0255775
ENSG00000271833.1	AL445222.1	-1.21649	0.0295233
ENSG00000167103.12	PIP5KL1	-2.2235	0.0263775
ENSG00000148346.12	LCN2	1.79073	0.0266768
ENSG00000106976.20	DNM1	1.32011	0.00249942
ENSG00000196358.11	NTNG2	-1.80729	0.0216457
ENSG00000233198.3	RNF224	-1.3329	0.00836888
ENSG00000198569.9	SLC34A3	-1.19635	0.013511
ENSG00000067057.17	PFKP	1.10689	0.0150864
ENSG00000215267.8	AKR1C7P	1.63436	0.0373811
ENSG00000231483.1	AL365356.4	2.75486	0.0223291
ENSG00000134461.16	ANKRD16	-1.04801	0.00143372
ENSG00000107485.17	GATA3	-2.70097	0.000918827
ENSG00000197308.9	GATA3-AS1	-3.67915	0.00369124
ENSG00000204682.6	CASC10	-1.64725	0.000147986
ENSG00000222071.1	MIR1915	-1.91203	0.0189819
ENSG00000283709.1	FAM238C	-1.44253	0.0269929
ENSG00000230445.4	LRRC37A6P	-1.95487	0.0127962
ENSG00000177283.7	FZD8	-1.89698	0.000468061
ENSG00000185904.11	LINC00839	-1.53338	0.0377208
ENSG00000259869.2	AL022344.1	-1.94145	0.0423917
ENSG00000165731.19	RET	-1.92484	0.0127056
ENSG00000237590.1	AL137026.2	2.98938	0.022464
ENSG00000165507.8	DEPP1	1.45454	0.00368591
ENSG00000264404.2	BX547991.1	1.28007	0.0279047
ENSG00000165471.6	MBL2	1.67566	0.00181936
ENSG00000171988.19	JMJD1C	1.36009	0.0108835
ENSG00000108176.15	DNAJC12	2.66376	0.04256
ENSG00000075073.14	TACR2	-1.68586	0.0206179
ENSG00000171224.9	FAM241B	1.06985	0.0130672
ENSG00000138315.13	OIT3	1.35334	0.00863873
ENSG00000133678.14	TMEM254	1.09863	0.0179038
ENSG00000173267.14	SNCG	1.37647	0.00691846
ENSG00000119922.10	IFIT2	1.60455	0.0141983
ENSG00000107864.15	CPEB3	1.10806	0.0101885
ENSG00000108231.13	LGI1	2.32515	0.000406264
ENSG00000108242.13	CYP2C18	-2.3996	0.0185426
ENSG00000095587.9	TLL2	-1.45421	0.0267051
ENSG00000225850.3	AL355490.1	-2.70289	0.0096121
ENSG00000241935.9	HOGA1	-1.28734	0.0060014
ENSG00000120057.5	SFRP5	-3.62714	0.00777986
ENSG00000107819.13	SFXN3	1.24364	0.00312882
ENSG00000227128.4	LBX1-AS1	-2.53079	0.030442
ENSG00000107859.10	PITX3	-2.14327	0.0323806
ENSG00000273108.1	AL121929.2	-2.23253	0.0380034
ENSG00000119913.5	TECTB	-1.18281	0.00896056
ENSG00000243316.7	GUCY2GP	2.07247	0.04937
ENSG00000148702.15	HABP2	-1.81655	0.000687016
ENSG00000188613.7	NANOS1	-1.51869	0.00102558
ENSG00000148908.15	RGS10	1.20559	0.00511559
ENSG00000270300.2	PHACTR2P1	3.46754	0.0137239
ENSG00000226864.2	ATE1-AS1	-1.70027	0.0247446
ENSG00000283095.1	FP565171.1	2.2856	0.00510318
ENSG00000235010.1	AL512622.1	-3.74743	0.0133126
ENSG00000171811.14	CFAP46	-1.18574	0.0207066
ENSG00000151651.16	ADAM8	-2.26045	0.000618131
ENSG00000255026.1	AC136475.3	-1.39182	0.0330442
ENSG00000251661.3	AC136475.1	1.24357	0.0233784
ENSG00000185187.13	SIGIRR	1.3298	0.0349458
ENSG00000254815.5	AP006284.1	-1.05513	0.0330831
ENSG00000177156.11	TALDO1	1.031	0.000731501
ENSG00000274897.3	PANO1	-2.22541	0.00763957
ENSG00000205869.2	KRTAP5-1	-1.42589	0.0231273
ENSG00000167244.20	IGF2	-1.31257	0.0203377
ENSG00000099869.7	IGF2-AS	-1.83476	0.0114385
ENSG00000064201.15	TSPAN32	2.16623	0.0046946
ENSG00000110628.14	SLC22A18	1.00857	0.021419
ENSG00000166341.8	DCHS1	-2.38272	0.00325259
ENSG00000183378.11	OVCH2	-1.51682	0.0149529
ENSG00000176716.5	OR10AB1P	-1.94172	0.0055089
ENSG00000166402.8	TUB	-1.24968	0.0130432
ENSG00000175356.13	SCUBE2	-1.03204	0.0342768
ENSG00000133805.15	AMPD3	1.53856	0.000870501
ENSG00000133800.8	LYVE1	1.33133	0.00605754
ENSG00000050165.17	DKK3	-2.6777	0.00335212
ENSG00000175868.14	CALCB	-3.15398	0.00410744
ENSG00000110693.17	SOX6	1.14651	0.00683048
ENSG00000179817.5	MRGPRX4	2.18129	0.0182111
ENSG00000110756.17	HPS5	-1.21159	0.000322097
ENSG00000228061.6	AC131571.1	1.67418	0.0381191
ENSG00000007372.22	PAX6	2.44615	4.24238e-06
ENSG00000281880.2	PAUPAR	1.91458	0.0308089
ENSG00000121691.6	CAT	1.34571	0.000982844
ENSG00000135374.9	ELF5	2.43746	0.000136673
ENSG00000179241.13	LDLRAD3	-1.30712	0.00150909
ENSG00000052850.7	ALX4	-1.62382	0.047581
ENSG00000110492.15	MDK	-1.18373	0.00318219
ENSG00000180720.7	CHRM4	-3.04412	0.000336615
ENSG00000247675.6	LRP4-AS1	-1.67749	0.00711703
ENSG00000254602.1	AP000662.1	-1.84165	0.0124769
ENSG00000183134.5	PTGDR2	2.22376	0.000218153
ENSG00000013725.14	CD6	-2.04372	0.0177395
ENSG00000256713.7	PGA5	-1.05777	0.0447274
ENSG00000149476.15	TKFC	1.08297	0.000881444
ENSG00000011347.9	SYT7	-1.49191	0.0012853
ENSG00000124915.10	AP002380.1	1.63076	0.0135394
ENSG00000134824.14	FADS2	-1.2637	0.000546547
ENSG00000124935.4	SCGB1D2	-2.58069	0.0249357
ENSG00000176485.11	PLA2G16	2.04883	0.00496266
ENSG00000278952.1	AP003068.4	-1.70942	0.0253899
ENSG00000175294.5	CATSPER1	1.05101	0.0263015
ENSG00000173599.14	PC	1.09741	0.00398608
ENSG00000250508.1	AP000808.1	2.4545	0.00742345
ENSG00000149243.15	KLHL35	-1.97102	0.0168804
ENSG00000254933.1	AP000785.1	-2.28683	0.0131401
ENSG00000255362.1	AP000785.2	-1.56348	0.0460804
ENSG00000137513.10	NARS2	1.03338	0.0272261
ENSG00000280339.1	AP001528.3	1.79282	0.041997
ENSG00000166575.17	TMEM135	1.21891	0.0277621
ENSG00000261645.6	DISC1FP1	2.08829	0.00124601
ENSG00000250519.6	AP002784.1	-2.11721	0.0239163
ENSG00000184384.14	MAML2	1.78712	0.000131053
ENSG00000137673.9	MMP7	2.76847	0.00102773
ENSG00000196954.14	CASP4	1.13286	0.00535331
ENSG00000137752.24	CASP1	-1.07583	0.0226008
ENSG00000285813.1	AP000813.1	-1.03806	0.0364352
ENSG00000182359.15	KBTBD3	1.38852	0.00160263
ENSG00000152402.10	GUCY1A2	-1.48323	0.00289552
ENSG00000110723.12	EXPH5	-1.03536	0.0158735
ENSG00000254416.5	AP000924.1	1.97117	0.00495067
ENSG00000254990.5	AP001781.1	2.00158	0.000180214
ENSG00000149295.14	DRD2	-2.69498	0.00623006
ENSG00000255710.2	AP003170.1	2.20544	0.0426466
ENSG00000180425.11	C11orf71	1.12203	0.0237993
ENSG00000255580.1	AP000462.1	-1.91958	0.0277829
ENSG00000237937.5	AP000770.1	-1.97192	0.0057383
ENSG00000276505.1	AP000892.2	-1.36947	0.0456876
ENSG00000160593.18	JAML	1.73333	0.00354799
ENSG00000149573.9	MPZL2	1.94829	0.00664119
ENSG00000280032.1	AP002800.1	3.02185	0.00751225
ENSG00000110375.3	UPK2	-2.31812	0.00315568
ENSG00000109927.10	TECTA	-1.40885	0.00555785
ENSG00000246790.2	AP000977.1	2.75624	0.0310696
ENSG00000255045.1	AP000866.5	1.74634	0.0232863
ENSG00000245498.6	AP000866.1	-1.16295	0.0063965
ENSG00000187686.4	KRT18P59	-1.8094	0.00932977
ENSG00000165495.16	PKNOX2	-1.68023	0.0457844
ENSG00000150455.13	TIRAP	1.3991	0.000147668
ENSG00000174370.9	C11orf45	-1.84278	0.0414755
ENSG00000151715.7	TMEM45B	1.22162	0.0285541
ENSG00000250132.6	AC004803.1	1.03128	0.0316082
ENSG00000111186.13	WNT5B	-2.60149	0.0391803
ENSG00000166159.11	LRTM2	2.52003	0.0307984
ENSG00000111254.8	AKAP3	1.43903	0.014308
ENSG00000111665.11	CDCA3	-1.17333	0.00948331
ENSG00000215241.3	LINC02449	-2.79451	0.0275161
ENSG00000226091.7	LINC00937	-2.72306	0.018844
ENSG00000245105.3	A2M-AS1	1.44057	0.0033279
ENSG00000278635.1	AC141557.2	1.53103	0.0112691
ENSG00000257027.1	AC010186.3	1.34978	0.00607383
ENSG00000139112.11	GABARAPL1	1.19788	0.000133813
ENSG00000213809.9	KLRK1	-2.22041	0.02758
ENSG00000111291.8	GPRC5D	1.34276	0.0145392
ENSG00000139055.7	ERP27	-1.71476	0.00728085
ENSG00000270926.1	AC008013.3	2.54689	0.0383557
ENSG00000177359.20	AC024940.2	-1.56314	0.0323369
ENSG00000177340.5	AC024940.1	-1.47568	0.0387614
ENSG00000139132.14	FGD4	1.17104	0.00199581
ENSG00000188906.16	LRRK2	-2.34175	0.00753708
ENSG00000139168.8	ZCRB1	1.0285	0.0267435
ENSG00000186897.5	C1QL4	-1.96883	0.049194
ENSG00000110911.15	SLC11A2	1.33935	0.0363824
ENSG00000284730.1	AC068987.5	-1.62586	0.00341562
ENSG00000172819.17	RARG	-1.54104	0.0148493
ENSG00000180806.5	HOXC9	1.07194	0.0132428
ENSG00000250742.3	LINC02381	-3.22381	0.00299241
ENSG00000166866.13	MYO1A	1.0802	0.0147576
ENSG00000118596.12	SLC16A7	-1.02736	0.0283734
ENSG00000277945.1	AC107308.1	1.65391	0.0393015
ENSG00000247131.5	AC025263.1	-1.7252	0.0316636
ENSG00000135643.5	KCNMB4	-1.77399	0.00428044
ENSG00000277247.1	AC083809.1	-3.43098	0.0148993
ENSG00000175183.10	CSRP2	-1.31274	0.00010544
ENSG00000274021.1	AC024909.1	1.14225	0.0123059
ENSG00000258365.1	AC073655.2	1.69038	0.0294326
ENSG00000028203.18	VEZT	1.08821	0.00891236
ENSG00000265917.1	MIR3685	2.38746	0.00520463
ENSG00000012504.15	NR1H4	1.30237	0.00406299
ENSG00000196091.13	MYBPC1	1.38272	0.0111429
ENSG00000139351.15	SYCP3	1.25867	0.00765117
ENSG00000281344.1	HELLPAR	-1.06865	0.014042
ENSG00000017427.16	IGF1	-2.36253	0.0289984
ENSG00000120820.12	GLT8D2	-1.03456	0.031257
ENSG00000256139.2	AC007637.1	1.09881	0.03582
ENSG00000122986.13	HVCN1	-1.13685	0.00403416
ENSG00000135144.7	DTX1	-2.08648	0.0409782
ENSG00000170890.14	PLA2G1B	1.36278	0.020577
ENSG00000157782.9	CABP1	-3.44084	0.00546145
ENSG00000176383.9	B3GNT4	-1.32678	0.0212861
ENSG00000130783.13	CCDC62	-1.23318	0.0382025
ENSG00000119242.8	CCDC92	-1.0861	0.0314301
ENSG00000139364.10	TMEM132B	-1.42868	0.0180794
ENSG00000253771.6	TPTE2P1	3.41513	0.00805439
ENSG00000132932.17	ATP8A2	-1.04815	0.03935
ENSG00000073910.21	FRY	1.13767	0.00270909
ENSG00000133121.21	STARD13	1.12741	0.000560077
ENSG00000183722.9	LHFPL6	-2.79483	0.000663695
ENSG00000237361.2	TUSC8	1.08111	0.0178933
ENSG00000231665.1	OGFOD1P1	-1.78567	0.0145205
ENSG00000102539.5	MLNR	-1.73158	0.00809837
ENSG00000136169.16	SETDB2	1.14862	0.00324971
ENSG00000253309.6	SERPINE3	-3.33403	0.0472986
ENSG00000178695.5	KCTD12	-2.82365	0.005285
ENSG00000179399.15	GPC5	-1.52032	0.0440568
ENSG00000223392.1	CLDN10-AS1	2.35038	0.0254361
ENSG00000260992.1	DOCK9-DT	-3.14491	0.0486286
ENSG00000041515.16	MYO16	-1.5743	0.0487644
ENSG00000187498.16	COL4A1	-1.56131	0.0311434
ENSG00000057593.13	F7	1.90916	0.00276506
ENSG00000222489.1	SNORA79B	-1.03207	0.0326513
ENSG00000258818.4	RNASE4	1.49845	0.00916001
ENSG00000139890.10	REM2	-2.79188	0.014252
ENSG00000139880.19	CDH24	-1.77953	0.0403031
ENSG00000139914.6	FITM1	1.34015	0.0302078
ENSG00000092010.15	PSME1	-1.06501	0.000567352
ENSG00000259529.2	AL136295.5	-1.08038	0.0223411
ENSG00000092009.10	CMA1	-1.98899	0.0211296
ENSG00000203546.7	AL139353.1	-2.05471	0.00196545
ENSG00000206596.1	RNU1-27P	-2.55192	0.00324891
ENSG00000206588.1	RNU1-28P	-3.66112	0.000151716
ENSG00000259022.2	DNAJC8P1	-1.30644	0.0117512
ENSG00000168348.4	INSM2	-3.11739	0.00184806
ENSG00000174373.16	RALGAPA1	1.33839	0.00932415
ENSG00000198807.12	PAX9	-1.62974	0.0303173
ENSG00000258700.5	LINC00871	2.85425	0.0248402
ENSG00000278771.1	RN7SL3	2.05643	0.0320672
ENSG00000274012.1	RN7SL2	1.99882	0.0455352
ENSG00000261120.1	AL133299.1	-2.53915	0.00186956
ENSG00000139974.15	SLC38A6	1.12957	0.000945521
ENSG00000139988.9	RDH12	1.87691	0.00683284
ENSG00000133985.3	TTC9	1.39226	0.0104777
ENSG00000251393.3	AC005280.1	2.43187	0.00353391
ENSG00000187097.12	ENTPD5	1.27967	0.00462096
ENSG00000259319.1	AF111167.2	-1.17431	0.0370231
ENSG00000266553.2	RN7SL356P	-1.12594	0.0178292
ENSG00000100593.18	ISM2	1.97695	0.000448293
ENSG00000258867.5	LINC01146	1.96363	0.0100664
ENSG00000165929.13	TC2N	-1.45915	0.0198782
ENSG00000175785.13	PRIMA1	-1.78742	0.00275279
ENSG00000140093.10	SERPINA10	1.11187	0.015623
ENSG00000186910.4	SERPINA11	2.47642	0.0306562
ENSG00000165953.9	SERPINA12	2.21023	0.0098031
ENSG00000036530.8	CYP46A1	-1.64602	0.0204289
ENSG00000258982.1	AL133523.1	-1.59542	0.00564108
ENSG00000258460.1	AL355096.1	1.58537	0.00440272
ENSG00000258919.1	AL049836.1	1.63223	0.015131
ENSG00000259088.1	AL137779.2	1.9929	0.0110655
ENSG00000213145.9	CRIP1	-1.21661	0.0456515
ENSG00000276141.4	WHAMMP3	1.47208	0.0378254
ENSG00000248334.6	WHAMMP2	1.65712	0.0355622
ENSG00000262728.5	AC123768.3	1.70643	0.0354804
ENSG00000166923.11	GREM1	-2.59549	0.034167
ENSG00000259287.2	AC010809.1	1.12815	0.0402282
ENSG00000140323.6	DISP2	-1.40684	0.0219325
ENSG00000137877.10	SPTBN5	-1.61296	0.0288202
ENSG00000242028.6	HYPK	-1.16255	0.0353095
ENSG00000171766.16	GATM	2.86486	0.0201159
ENSG00000166147.13	FBN1	-1.89756	0.00411224
ENSG00000140284.11	SLC27A2	1.17016	0.0054961
ENSG00000273674.4	AC021752.1	1.41659	0.0260017
ENSG00000140280.14	LYSMD2	-1.08133	0.0365248
ENSG00000069943.10	PIGB	1.24164	0.0057599
ENSG00000171016.12	PYGO1	-1.18371	0.00123791
ENSG00000285805.1	AC012378.2	-2.64958	0.0111469
ENSG00000166035.11	LIPC	1.4551	0.000403733
ENSG00000140297.13	GCNT3	1.14808	0.00206315
ENSG00000182718.16	ANXA2	1.56429	0.0284021
ENSG00000234438.4	KBTBD13	-2.6437	0.0124394
ENSG00000174485.15	DENND4A	1.00818	0.0200389
ENSG00000157890.17	MEGF11	-1.11316	0.0496359
ENSG00000187720.14	THSD4	-1.10622	0.0238232
ENSG00000175318.12	GRAMD2A	-1.71977	0.0468468
ENSG00000137817.17	PARP6	-1.68365	0.00747734
ENSG00000260339.1	HEXA-AS1	-2.09535	0.0110137
ENSG00000205363.5	INSYN1	-2.63614	0.0205256
ENSG00000261801.5	LOXL1-AS1	-1.49246	0.0408071
ENSG00000178718.6	RPP25	-1.39584	0.021902
ENSG00000169783.12	LINGO1	-2.28235	0.0190893
ENSG00000136425.13	CIB2	-1.56187	0.00154696
ENSG00000140403.12	DNAJA4	-1.3766	0.01342
ENSG00000235711.4	ANKRD34C	-3.03039	0.0231969
ENSG00000103888.17	CEMIP	2.23507	0.00142076
ENSG00000274376.4	ADAMTS7P1	-2.07258	0.0225818
ENSG00000103723.13	AP3B2	-2.73571	0.0011971
ENSG00000259726.1	CSPG4P11	-2.10849	0.0380804
ENSG00000259728.5	LINC00933	2.6373	0.0166743
ENSG00000197696.10	NMB	-1.00096	0.0016149
ENSG00000140511.11	HAPLN3	-2.44697	0.00449165
ENSG00000140545.15	MFGE8	-1.40387	0.0401342
ENSG00000185518.11	SV2B	-1.32959	0.0469128
ENSG00000176463.14	SLCO3A1	-1.93229	0.0457618
ENSG00000258527.1	ASB9P1	1.70575	0.0210561
ENSG00000257060.6	AC091078.1	2.37415	0.0093127
ENSG00000182253.14	SYNM	-1.19341	0.0101347
ENSG00000140470.14	ADAMTS17	-1.45408	0.0220724
ENSG00000279970.1	AC023024.2	1.54825	0.0053518
ENSG00000282793.1	AC090164.4	1.28329	0.0371808
ENSG00000185615.15	PDIA2	1.87819	0.00353214
ENSG00000127585.12	FBXL16	1.03131	0.00906406
ENSG00000102854.16	MSLN	1.12204	0.00291425
ENSG00000116176.6	TPSG1	3.89496	0.00163465
ENSG00000260051.1	AL031600.1	-1.02041	0.0217964
ENSG00000183971.8	NPW	-1.51281	0.00875102
ENSG00000065057.8	NTHL1	1.10896	0.00355346
ENSG00000276791.1	AC092117.1	-1.1767	0.0253038
ENSG00000162078.11	ZG16B	1.01401	0.0110639
ENSG00000274367.1	AC004233.4	-1.85326	0.0031966
ENSG00000272079.2	AC004233.3	-1.02251	0.0325385
ENSG00000184697.7	CLDN6	-1.71427	0.000197205
ENSG00000262370.5	AC108134.3	1.44666	0.0102022
ENSG00000130182.8	ZSCAN10	-2.52011	0.000859952
ENSG00000168140.5	VASN	-1.42651	0.000998036
ENSG00000277170.1	AC012676.3	1.49741	0.0321672
ENSG00000103489.11	XYLT1	-2.34543	0.0111126
ENSG00000260342.2	AC138811.2	-2.14487	0.0181463
ENSG00000103534.17	TMC5	1.68435	0.0305769
ENSG00000183747.12	ACSM2A	2.3833	0.0125164
ENSG00000260762.1	ACSM5P1	-2.8217	0.025773
ENSG00000261266.2	AC008870.3	-3.31195	0.029886
ENSG00000182601.7	HS3ST4	-2.42887	0.0221286
ENSG00000250982.2	GAPDHP35	-3.25285	0.0178865
ENSG00000198156.10	NPIPB6	-1.14697	0.0345633
ENSG00000197471.12	SPN	-1.83991	0.00270447
ENSG00000197162.9	ZNF785	-1.29316	0.014671
ENSG00000156886.11	ITGAD	2.83608	0.0110108
ENSG00000261727.2	AC142381.4	-3.03702	0.0188592
ENSG00000259882.2	AC142384.1	-1.76484	0.0145248
ENSG00000260308.1	AC136428.2	-2.82079	0.0201049
ENSG00000261173.1	AC018845.3	-1.09457	0.048465
ENSG00000102893.16	PHKB	1.2692	0.00165904
ENSG00000260249.2	AC007608.3	-2.23002	0.0497896
ENSG00000103546.18	SLC6A2	-2.56293	0.000358079
ENSG00000278928.1	AC136621.1	-2.71249	0.00110543
ENSG00000140853.15	NLRC5	2.7092	0.000945286
ENSG00000260828.1	HMGB3P32	2.50119	0.0161837
ENSG00000103034.14	NDRG4	1.10836	0.0365485
ENSG00000261807.2	LINC02141	-2.6471	0.0280303
ENSG00000150394.14	CDH8	-3.36572	0.0162128
ENSG00000166589.13	CDH16	1.96786	0.0017062
ENSG00000176387.7	HSD11B2	-2.60946	0.00148233
ENSG00000261469.1	AC020978.4	-1.26839	0.0146751
ENSG00000103056.12	SMPD3	-1.37781	0.00478434
ENSG00000279693.1	AC099521.2	-5.27898	0.00527123
ENSG00000274698.1	AC099521.1	-3.26595	0.0100971
ENSG00000260290.2	AC092115.1	-1.30284	0.0270765
ENSG00000157335.20	CLEC18C	-1.37538	0.0445967
ENSG00000261556.9	SMG1P7	-1.04873	0.0278403
ENSG00000257017.8	HP	2.70065	0.0112027
ENSG00000261701.7	HPR	3.12029	0.0129059
ENSG00000261079.1	AC009053.2	-2.37259	0.0261782
ENSG00000168925.11	CTRB1	-2.16875	0.0146487
ENSG00000260876.5	LINC01229	-2.36348	0.0377975
ENSG00000166446.15	CDYL2	-1.25794	0.0294642
ENSG00000166473.17	PKD1L2	1.17364	0.00125572
ENSG00000269901.1	AC010531.5	1.11729	0.00648065
ENSG00000015413.9	DPEP1	1.26031	0.00167551
ENSG00000273172.1	LINC02091	-5.36609	0.00456384
ENSG00000262294.1	AC129507.2	1.44665	0.0217406
ENSG00000231784.8	DBIL5P	-1.25788	0.047797
ENSG00000185924.7	RTN4RL1	-2.13991	0.0288217
ENSG00000177374.13	HIC1	-1.31405	0.00476624
ENSG00000240898.1	AC132942.1	-1.20604	0.0388592
ENSG00000108405.4	P2RX1	-1.42883	0.032656
ENSG00000188176.12	SMTNL2	-1.49571	0.0291927
ENSG00000142484.7	TM4SF5	1.93006	0.00213352
ENSG00000182853.12	VMO1	2.03836	0.00114662
ENSG00000282936.1	AC004706.3	-1.34717	0.00164872
ENSG00000141505.12	ASGR1	1.30502	0.00516145
ENSG00000169992.10	NLGN2	-1.03116	0.0170955
ENSG00000141506.13	PIK3R5	-3.43015	0.00917992
ENSG00000125414.19	MYH2	-2.96431	0.00631449
ENSG00000259024.6	TVP23C-CDRT4	1.85833	0.0268659
ENSG00000141040.15	ZNF287	-2.3029	0.00844311
ENSG00000128438.10	TBC1D27P	-3.03762	0.0341934
ENSG00000205309.14	NT5M	-1.22663	0.0163151
ENSG00000168961.17	LGALS9	-1.37691	0.0457324
ENSG00000007171.17	NOS2	2.46022	0.00292891
ENSG00000267729.1	AC010761.7	-2.48034	0.0416527
ENSG00000168792.5	ABHD15	-1.24535	0.0144251
ENSG00000198720.13	ANKRD13B	-1.71299	0.0113767
ENSG00000184060.11	ADAP2	1.11475	0.0221183
ENSG00000264107.1	AC138207.2	-1.10099	0.025042
ENSG00000141314.13	RHBDL3	-1.48701	0.0351114
ENSG00000092871.16	RFFL	1.01152	0.00165672
ENSG00000166750.10	SLFN5	-1.56546	0.0010069
ENSG00000267312.1	AC015911.4	1.86	0.0299428
ENSG00000271447.6	MMP28	-1.8315	0.0328868
ENSG00000275152.5	CCL16	3.49479	0.000247674
ENSG00000275431.1	AC244100.2	1.25715	0.012773
ENSG00000275718.2	CCL15	1.47844	0.000744878
ENSG00000275944.1	AC244100.3	1.34728	0.000518222
ENSG00000278690.1	AC244100.4	1.72717	0.00420419
ENSG00000274736.5	CCL23	1.86632	0.00185628
ENSG00000274620.1	MIR378J	1.76035	0.030693
ENSG00000277399.4	GPR179	-1.51707	0.0474107
ENSG00000273576.1	AC009283.1	-1.21484	0.0117103
ENSG00000141738.14	GRB7	1.35903	4.57439e-05
ENSG00000264968.1	AC090844.2	1.60988	0.0455587
ENSG00000265799.1	AC090844.3	-1.16649	0.0247325
ENSG00000279199.1	AC068669.1	-1.38274	0.0286633
ENSG00000266088.5	AC004585.1	1.57667	0.0157771
ENSG00000196859.7	KRT39	1.96389	0.0393589
ENSG00000173805.15	HAP1	-1.46671	0.0150769
ENSG00000131482.9	G6PC	2.81838	0.00644759
ENSG00000184988.8	TMEM106A	1.60548	4.16831e-05
ENSG00000279602.1	AC109326.1	-1.1822	0.00841434
ENSG00000260793.2	AC003102.1	-1.39904	0.00560073
ENSG00000073670.14	ADAM11	-1.69406	0.00326063
ENSG00000131095.13	GFAP	-1.40126	0.0218369
ENSG00000131094.4	C1QL1	-2.33079	0.000822089
ENSG00000236234.1	AC091132.2	-2.71711	0.00840558
ENSG00000158955.11	WNT9B	-1.37563	0.0382856
ENSG00000167080.8	B4GALNT2	-1.08193	0.0265831
ENSG00000006283.18	CACNA1G	-2.04129	0.0417836
ENSG00000011052.21	NME1-NME2	-1.22162	0.0181009
ENSG00000279207.1	AC015813.6	-1.18836	0.00598343
ENSG00000159640.16	ACE	-3.22609	0.00915633
ENSG00000279369.1	AC046185.3	-1.89859	0.00540309
ENSG00000239823.2	RF00019	2.26486	0.00555711
ENSG00000264057.1	AC103810.1	-2.14307	0.0417825
ENSG00000108370.17	RGS9	-1.91467	0.00449892
ENSG00000141337.12	ARSG	1.04292	0.00106003
ENSG00000108932.12	SLC16A6	2.37396	0.0195004
ENSG00000070540.13	WIPI1	1.09742	0.00818182
ENSG00000207561.1	MIR635	1.04848	0.00583605
ENSG00000187959.9	CPSF4L	1.12938	0.0362788
ENSG00000069188.17	SDK2	-1.36896	0.020584
ENSG00000246731.2	AC100786.1	-2.45481	0.0263474
ENSG00000250506.7	CDK3	1.49046	0.0412287
ENSG00000182687.4	GALR2	-1.09041	0.00417231
ENSG00000167889.12	MGAT5B	-1.13935	0.0266203
ENSG00000263718.2	AC068594.1	-1.56608	0.00205346
ENSG00000267123.6	SCAT1	1.52151	0.00124576
ENSG00000182156.10	ENPP7	1.27236	0.0241947
ENSG00000262772.1	LINC01977	1.30968	0.016605
ENSG00000171246.6	NPTX1	-1.98974	0.0271303
ENSG00000185105.5	MYADML2	-3.02989	0.0202789
ENSG00000185269.12	NOTUM	1.25525	0.0134723
ENSG00000266445.1	NARF-AS1	-2.04857	0.00538733
ENSG00000267478.1	AP002414.3	-2.08298	0.041714
ENSG00000267704.1	FRG2LP	-4.11678	0.00454069
ENSG00000154065.17	ANKRD29	-1.58589	0.0497399
ENSG00000265750.1	AC090772.3	-1.4363	0.00386172
ENSG00000285095.1	AC025887.2	-2.25883	0.0413517
ENSG00000197705.9	KLHL14	1.94861	0.000193816
ENSG00000206052.11	DOK6	1.19838	0.0238797
ENSG00000206043.6	C18orf63	-2.15522	0.0282904
ENSG00000264278.1	ZNF236-DT	-1.3727	0.00457427
ENSG00000267666.2	AC004156.1	-2.44028	0.0488479
ENSG00000070404.10	FSTL3	-1.40414	0.0171642
ENSG00000116014.10	KISS1R	-1.21349	0.00650193
ENSG00000099625.13	CBARP	-1.03564	0.0466871
ENSG00000176490.5	DIRAS1	-1.65958	0.00145992
ENSG00000065717.15	TLE2	-2.17826	0.0489679
ENSG00000268670.1	AC016586.1	-1.26679	0.0288297
ENSG00000156413.13	FUT6	1.88602	0.00181783
ENSG00000181029.9	TRAPPC5	-1.26412	0.0230781
ENSG00000278611.1	ZNF426-DT	1.59912	0.0234222
ENSG00000105088.8	OLFM2	-2.24744	0.00543973
ENSG00000130173.13	ANGPTL8	1.53315	0.000929738
ENSG00000183401.12	CCDC159	1.14557	0.00350043
ENSG00000187266.14	EPOR	-1.33687	0.0039427
ENSG00000278897.1	AC020951.1	1.46566	0.0299624
ENSG00000198342.10	ZNF442	-1.13725	0.00350117
ENSG00000267519.6	AC020916.1	-1.0331	0.0117487
ENSG00000187867.8	PALM3	1.30983	0.0107672
ENSG00000161031.13	PGLYRP2	1.89508	0.00766514
ENSG00000269720.2	CCDC194	-1.7915	0.00473993
ENSG00000267565.1	AC011477.3	-1.30797	0.0174642
ENSG00000184635.15	ZNF93	-1.89422	0.0144219
ENSG00000197134.12	ZNF257	-2.16476	0.002889
ENSG00000198597.9	ZNF536	-2.22855	0.0259926
ENSG00000124302.13	CHST8	-1.90876	0.0402197
ENSG00000105711.12	SCN1B	1.86085	0.00202228
ENSG00000268947.1	AC002128.1	-1.1259	0.0442785
ENSG00000105675.8	ATP4A	-1.06996	0.0226838
ENSG00000225975.6	LINC01534	1.58865	0.0118099
ENSG00000267041.6	ZNF850	-1.56526	0.00705972
ENSG00000198453.13	ZNF568	-1.95533	0.0172603
ENSG00000171804.10	WDR87	-1.69491	0.0482129
ENSG00000188766.12	SPRED3	-1.11237	0.0278457
ENSG00000104814.13	MAP4K1	-3.27508	0.0081347
ENSG00000267107.7	PCAT19	-2.05351	0.000973276
ENSG00000105737.9	GRIK5	-3.83816	0.000497271
ENSG00000234465.11	PINLYP	-1.58531	0.0152394
ENSG00000159915.12	ZNF233	1.29918	0.0275043
ENSG00000273777.4	CEACAM20	2.4431	0.0187069
ENSG00000234906.10	APOC2	1.11966	0.00530761
ENSG00000104936.17	DMPK	-1.0671	0.0182324
ENSG00000204869.8	IGFL4	2.51183	0.000509668
ENSG00000134830.5	C5AR2	-3.15937	0.0137668
ENSG00000118160.14	SLC8A2	-2.00092	0.00819577
ENSG00000277383.1	AC010331.1	-1.12192	0.0232604
ENSG00000182324.6	KCNJ14	1.87486	0.0149452
ENSG00000088002.11	SULT2B1	-1.90147	0.0101611
ENSG00000286024.1	AC026803.3	1.65295	0.00630641
ENSG00000087076.9	HSD17B14	-1.00516	0.0410482
ENSG00000267898.1	AC026803.2	-1.15961	0.0474999
ENSG00000225950.8	NTF4	-1.64497	0.0229248
ENSG00000104848.1	KCNA7	-2.27083	0.0341355
ENSG00000204653.10	ASPDH	1.56705	0.00602574
ENSG00000161681.15	SHANK1	-3.24129	0.0135456
ENSG00000105383.15	CD33	-2.01873	0.0218061
ENSG00000268520.1	AC008750.5	1.10515	0.0486526
ENSG00000142512.15	SIGLEC10	-1.47597	0.0132691
ENSG00000283236.1	AC074141.1	-1.10131	0.0127036
ENSG00000237017.1	AC245052.4	-1.06181	0.0375403
ENSG00000167608.11	TMC4	-1.31891	0.0180003
ENSG00000167618.10	LAIR2	1.41991	0.0426565
ENSG00000187550.8	SBK2	-1.60995	0.0247173
ENSG00000171487.14	NLRP5	-1.84164	0.0329236
ENSG00000267710.9	EDDM13	1.66658	0.0114885
ENSG00000018869.16	ZNF582	1.07449	0.00945722
ENSG00000196724.12	ZNF418	-2.52997	0.0147413
ENSG00000268912.1	AC012313.5	-1.54089	0.0168342
ENSG00000125898.13	FAM110A	-1.24542	0.030065
ENSG00000088881.20	EBF4	-2.12563	0.00119372
ENSG00000171873.7	ADRA1D	2.59885	0.000133683
ENSG00000101333.16	PLCB4	-1.55495	0.0081411
ENSG00000230990.1	AL049649.1	-2.47335	0.0140372
ENSG00000232838.4	PET117	1.00237	0.0182259
ENSG00000173404.5	INSM1	-1.5883	0.0443414
ENSG00000088970.16	KIZ	1.23169	0.0133982
ENSG00000232712.6	KIZ-AS1	1.071	0.00995789
ENSG00000230400.2	LINC01747	-2.98134	0.000253651
ENSG00000170369.4	CST2	-3.34631	0.0232717
ENSG00000077984.6	CST7	1.49624	0.0409269
ENSG00000277938.1	AL035252.3	-1.322	0.0394035
ENSG00000227379.2	PPIAP2	-3.17139	0.0303149
ENSG00000230772.1	VN1R108P	1.46225	0.0319451
ENSG00000125804.13	FAM182A	-2.61117	0.00609867
ENSG00000101331.15	CCM2L	-2.51431	0.0295062
ENSG00000101336.14	HCK	-1.73579	0.0250775
ENSG00000204117.1	AL162293.1	-1.3973	0.0212509
ENSG00000132821.12	VSTM2L	-3.54201	0.00216582
ENSG00000124143.10	ARHGAP40	1.64172	0.0022994
ENSG00000229771.2	AL035665.1	-2.2539	0.0376187
ENSG00000226648.1	PLCG1-AS1	-1.92385	0.000543386
ENSG00000124194.16	GDAP1L1	-2.80606	0.0318122
ENSG00000229005.2	HNF4A-AS1	2.09641	0.0427795
ENSG00000124102.5	PI3	3.08623	0.0400224
ENSG00000101443.18	WFDC2	-2.07114	0.00305985
ENSG00000124116.19	WFDC3	-2.51817	0.0302904
ENSG00000286063.1	AL121888.1	-2.30124	0.0270547
ENSG00000124126.14	PREX1	-1.15188	0.0378292
ENSG00000230758.1	SNAP23P1	-1.27295	0.0171214
ENSG00000227431.5	CSE1L-AS1	-1.11355	0.0191099
ENSG00000158445.10	KCNB1	-1.02827	0.0301111
ENSG00000124212.6	PTGIS	-1.51315	0.0417012
ENSG00000231703.2	AL354993.1	-2.33555	0.0437649
ENSG00000087589.16	CASS4	1.72082	0.0163947
ENSG00000283078.1	AL137077.2	-1.05786	0.0235176
ENSG00000101180.16	HRH3	-2.53631	0.0173765
ENSG00000130701.4	RBBP8NL	2.65989	0.00144288
ENSG00000101187.16	SLCO4A1	2.05023	0.00167575
ENSG00000203900.2	AL121827.1	-2.87321	0.00550807
ENSG00000197457.10	STMN3	-2.17485	5.39137e-05
ENSG00000203896.10	LIME1	-1.1402	0.00460219
ENSG00000203883.7	SOX18	-1.73824	0.00622728
ENSG00000274276.4	CBSL	-2.75493	0.00568885
ENSG00000278233.1	RNA5-8SN2	3.7406	0.0466313
ENSG00000279390.1	AF127577.6	-1.16194	0.0368671
ENSG00000229962.1	AP000221.1	-3.34756	0.0100381
ENSG00000286018.1	AF129075.3	1.16707	0.0144372
ENSG00000236830.6	CBR3-AS1	-1.41445	0.044079
ENSG00000182093.15	WRB	1.02001	0.0090193
ENSG00000160180.15	TFF3	1.48157	0.0472017
ENSG00000160182.3	TFF1	5.19384	0.0150197
ENSG00000160183.15	TMPRSS3	2.67591	0.0020564
ENSG00000160233.8	LRRC3	1.03953	0.00594072
ENSG00000235890.2	TSPEAR-AS1	1.16993	0.00117845
ENSG00000142156.14	COL6A1	-1.65654	0.00588666
ENSG00000040608.14	RTN4R	-2.27486	0.00778783
ENSG00000099957.16	P2RX6	2.17201	0.0240293
ENSG00000234630.1	AC245060.2	-1.159	0.0262631
ENSG00000234884.1	AL022329.1	-5.17507	0.00597015
ENSG00000169184.6	MN1	-1.99829	0.00707803
ENSG00000214491.8	SEC14L6	2.44309	0.00729795
ENSG00000185339.8	TCN2	2.81354	6.83374e-05
ENSG00000100342.20	APOL1	1.49331	0.0383519
ENSG00000231467.2	AL022314.1	-5.27453	0.00845097
ENSG00000205704.6	LINC00634	-2.70813	0.0179999
ENSG00000100167.20	SEPT3	-1.78987	0.0441305
ENSG00000235568.6	NFAM1	-2.72476	0.0117461
ENSG00000186732.14	MPPED1	-2.43508	0.0344895
ENSG00000056487.16	PHF21B	-3.1149	0.00230948
ENSG00000100373.10	UPK3A	2.16454	0.00162948
ENSG00000073150.13	PANX2	1.84557	0.0163668
ENSG00000008735.14	MAPK8IP2	-1.41739	0.0128961
ENSG00000124343.13	XG	-2.48312	0.00345468
ENSG00000101825.8	MXRA5	-2.73442	0.011636
ENSG00000011201.12	ANOS1	-2.36571	0.00325747
ENSG00000101850.13	GPR143	-1.51857	0.00213913
ENSG00000087842.11	PIR	1.67124	0.000353087
ENSG00000130234.10	ACE2	5.25811	0.00549473
ENSG00000044446.11	PHKA2	1.10422	0.0422126
ENSG00000177189.13	RPS6KA3	1.3183	0.0276936
ENSG00000226781.1	TBCAP1	1.37609	0.0272213
ENSG00000156298.12	TSPAN7	-1.16397	0.0311269
ENSG00000165175.15	MID1IP1	-1.39279	0.00119661
ENSG00000238123.1	MID1IP1-AS1	-1.6085	0.0296339
ENSG00000189221.9	MAOA	1.39107	0.004237
ENSG00000235636.1	NUS1P1	1.56558	0.0320334
ENSG00000267064.1	UXT-AS1	2.0879	0.0323448
ENSG00000234390.4	USP27X-AS1	1.55388	0.00146115
ENSG00000154545.16	MAGED4	4.98762	0.00553706
ENSG00000227329.2	AL139396.1	2.31502	0.043187
ENSG00000221716.1	SNORA11	-2.0462	0.0432329
ENSG00000187601.4	MAGEH1	-1.64448	0.000159165
ENSG00000131089.15	ARHGEF9	-1.49292	0.0173056
ENSG00000120500.17	ARR3	-1.06841	0.00780742
ENSG00000184481.16	FOXO4	1.0607	0.0126362
ENSG00000198157.10	HMGN5	-1.24634	0.0284046
ENSG00000126733.21	DACH2	-1.30729	0.0477746
ENSG00000102271.14	KLHL4	1.36375	0.0273078
ENSG00000207146.1	RF00019	-1.09572	0.0383401
ENSG00000243978.8	RTL9	-1.94935	0.0335166
ENSG00000077264.15	PAK3	-1.81588	0.0483335
ENSG00000126016.15	AMOT	-2.06479	0.00363869
ENSG00000174460.4	ZCCHC12	-1.42936	0.00994788
ENSG00000171155.8	C1GALT1C1	1.04471	0.010078
ENSG00000171388.12	APLN	-1.63395	0.00566491
ENSG00000122121.11	XPNPEP2	2.33067	1.19839e-05
ENSG00000147255.19	IGSF1	1.96618	5.49031e-05
ENSG00000236091.1	LINC02243	2.72386	0.0160041
ENSG00000196972.9	SMIM10L2B	-1.61796	0.0287735
ENSG00000129682.16	FGF13	-1.51028	0.047677
ENSG00000234696.1	GPR50-AS1	-2.87154	0.0167652
ENSG00000067840.12	PDZD4	-1.81409	0.0223568
ENSG00000160211.17	G6PD	-1.1728	0.0146883
ENSG00000275882.1	IKBKGP1	1.31163	0.0343967
ENSG00000169093.16_PAR_Y	ASMTL	2.7531	0.0295684
ENSG00000182162.11_PAR_Y	P2RY8	3.28336	0.0204512
ENSG00000197976.12_PAR_Y	AKAP17A	-1.97855	0.0335096
ENSG00000012817.15	KDM5D	1.22881	0.000388346
