# Supplementary material for: TP53-inducible putative long noncoding RNAs encode functional polypeptides that suppress cell proliferation
Source: HighWire-hosted journal article supplement (doi:10.1101/gr.275831.121), 2022-05-24
Supplement: Supplemental_Table_S10.xlsx [file Supplemental_Table_S10.xlsx]

## Sheet: README
Supplemental Table S10: Sequences of primers and oligos used in this study.
Primers and oligos corresponding to the qPCR,ChIP-qPCR, vectors construction and the identification for knocked-out/ down cell lines.

## Sheet: Sheet1
Primer sequences for qPCR
GENE NAME	FORWARD	REVERSE
TP53LC01	ACCAGCCACACCTTGTCTCT	CTTGGACTTCCCCAGCAGA
TP53LC02	GTTAGAATCGTGGGCTGCTT	TCTTTCTGGGTCAGGGTTATTC
TP53LC03	CTCAGATCAAGGATTCGGAGA	CAGACGACGGCAGCCATTAC
TP53LC04	ATGGAACCGAGGATGGGG	CTTGAACTTGGGAGGCAGAG
TP53LC05	TCCCCCAAAAAGATCCTGC	TTGGCTCAAGAGGTTGGGAC
TP53LC06	ACGGAGGAACTTCAGAGGC	ACGGATGAGGAAACAAGTACG
TP53LC07	TCAAGCGGAGAAGCGGAC	GGTAGAAAACGCCAGCCAG
TP53LC08	TGTATTTACCTGCCGCCAA	CCCCATTTGAGCATGAACCT
TP53LC09	AAGATGCCCCTCAAGATGG	GCGTTATTCCCCAGACCA
TP53LC10	GTGATTACGGCTGTCCCTGA	TGGTGTCTGAGTTAGGATGGC
TP53LC11	CTACAAATACTTCAGCCTAACACG	TCAGCCACAAAAACGAGCA
TP53LC12	CCCATTTTCACCCAACTTCT	GGTGTAAGTGTTCGCCTGGT
TP53LC13	ACCAGCAATGTAAGTGATGACC	GAGACCCAGAAGCCTGAAAGT
TP53LC14	CTTCCCACAGGGCACTTG	TTTTGGTGACGGCATAGACA
TP53LC15	ATGACTGAGTTAGATGAGACGAGG	TGGAGCGTGGCTGTTCTG
TP53LC16	GCCGAGACAACTGGGAGAG	CTTGTTCCTCTGATTTACCTGG
TP53LC17	GTCAGCCTACAAGGACACAGC	TTCTCTGTCTCTGTTTCCCTGA
TP53LC18	TCCCGTCTCCAGAAGCCT	GGGAGGGGAAGAGTTGCC
TP53LC19	GCTCCTTCTTCAGTTTCTCGG	GCTCATGGTTGACTCTGTGTTG
TINCR	TGGACGACCACCAGACGG	AGCCTATTCCTTCAGCCAGTA
hMINION	GAGAGGAGGGAGAGGTTAGGC	CTGTCCACTGGGCAGGCTTC
GAPDH	CCATGGGGAAGGTGAAGGTC	GAAGGGGTCATTGATGGCAAC
TP53	TAACAGTTCCTGCATGGGCGGC	AGGACAGGCACAAACACGCACC
E2F7	AGAAGAAAGCCAAGATGCCC	AAGCTGGTCAGAACATTGGC
CCNE1	TCATCTTTATTTATTGCAGCCAAAC	TCACATACGCAAACTGGTGC
CCNE2	CCTCAGTATTCTCAGGAAACATTCA	TGGAACTCTAATGAATCAATGGC
HIC1	CCTGGTGCTGGACTTCATCT	TTGAGGCGTTTCTTGCACAG
PMAIP1	CTCTTTCCTCCTCGCCACTT	TGCCGGAAGTTCAGTTTGTC
Related sequences and primers used for vectors construction
GENE NAME	Sequence (5'- 3')
TP53LC01-Fw	aagcttaaggaattcgatatcTGAAGATGAATCCTGACTGCCTG
TP53LC01-Re	gtctttgtagtcggggatatcGGGGCAGCTGGTGCGATA
TP53LC01+T-Fw	aagcttaaggaattcgatatcTGAAGATTGAATCCTGACTGCCT
TP53LC02-Fw	aagcttaaggaattcgatatcCAAAATGGTGGCGCCGAG
TP53LC02-Re	gtctttgtagtcggggatatcTTCGCGCGGCTCCGCCTC
TP53LC02+T-Fw	aagcttaaggaattcgatatcCAAAATTGTGGCGCCGAG
TP53LC02-R1	ctggcgcaagACCAGTGCGGGCCGCCTG
TP53LC02-F1	ccgcactggtCTTGCGCCAGGCCCAGCC
TP53LC03-Fw	aagcttaaggaattcgatatcGTCTAGGGGTATGATTCTCGCTTC
TP53LC03-Re	gtctttgtagtcggggatatcGGCACCAATCGTCAGATGGA
TP53LC03+T-Fw	aagcttaaggaattcgatatcGTCTAGGGGTATTGATTCTCGCTT
TP53LC03-R1	TCCTGACATGCCAGGCGG
TP53LC03-F1	TAAGTCATCAATTGTACAGTAAGCTCTTTT
TP53LC04-Fw	aagcttaaggaattcgatatcCTCAATCCCTTGGTCTCTCTGATT
TP53LC04-Re	gtctttgtagtcggggatatcAAGAAACTGACACAGGAGAATCACTT
TP53LC04+T-Fw	aagcttaaggaattcgatatcAGGATTGGAGATTGACAGATTTACTG
TP53LC05-Fw	aagcttaaggaattcgatatcAGCGGCGGCGATGCTAAT
TP53LC05-Re	gtctttgtagtcggggatatcAGAGGTTGGGACTGGGGCG
TP53LC05+T-Fw	aagcttaaggaattcgatatcAGCGGCGGCGATTGCTAA
TP53LC05+dT-R1	ttttgggggaagctggaatCCCGGCGCTGGCCTCGGC
TP53LC05+dT-F1	gATTCCAGCTTCCCCCAAAAA
TP53LC06-Fw	aagcttaaggaattcgatatcGGCACGGGCCATGCCTGA
TP53LC06-Re	gtctttgtagtcggggatatcCGGATGAGGAAACAAGTACGCA
TP53LC06+T-Fw	aagcttaaggaattcgatatcGGCACGGGCCATTGCCTG
TP53LC07-Fw	aagcttaaggaattcgatatcCTGAATTTTCATGGCCATGGG
TP53LC07-Re	gtctttgtagtcggggatatcAATGCTGATATTGTGGAGAAGAGGA
TP53LC07+T-Fw	aagcttaaggaattcgatatcCTGAATTTTCATTGGCCAGGG
TP53LC08-Fw	aagcttaaggaattcgatatcGCTTGGGACCATGTGCCC
TP53LC08-Re	gtctttgtagtcggggatatcCAACACAGGCTCCAGTATATAAATCA
TP53LC08+T-Fw	aagcttaaggaattcgatatcGCTTGGGACCATTGTGCCC
TP53LC09-Fw	aagcttaaggaattcgatatcCCGAGCACATGGGCCCGC
TP53LC09-Re	gtctttgtagtcggggatatcGCCAGCTGCAGTCCTTCGT
TP53LC09+T-Fw	aagcttaaggaattcgatatcCCGAGCACATTGGCCCGC
TP53LC09-R1	gccaacaatCCTTTCCGCAAGGAAATCCA
TP53LC09-F1	ttgcggaaaggATTGTTGGCGGTCCCTGTG
TP53LC10-Fw	aagcttaaggaattcgatatcCGGGAGCCTCATGCAAACT
TP53LC10-Re	gtctttgtagtcggggatatcGGCCCAGAGTCCCCAGGA
TP53LC10+T-Fw	aagcttaaggaattcgatatcCGGGAGCCTCATTCAAACTG
TP53LC10-R1	tcccagaggcactcaagCAAGGGCCAGGGACGGCA
TP53LC10-F1	ttgCTTGAGTGCCTCTGGGACGA
TP53LC11-Fw	aagcttaaggaattcgatatcGCCTGAAGGGATGTACAGCTCC
TP53LC11-Re	gtctttgtagtcggggatatcTGCCGAACCCACAGTCATTG
TP53LC11+T-Re	gtctttgtagtcggggatatcTGCCGAACCCACAGTCAATT
TP53LC12-Fw	aagcttaaggaattcgatatcAGCTTCCTGCATGATGCTGG
TP53LC12-Re	gtctttgtagtcggggatatcCTGTTCTTTTGCCAAGACACGG
TP53LC12+T-Fw	aagcttaaggaattcgatatcAGCTTCCTGCATGATGTCTGG
TP53LC13-Fw	aagcttaaggaattcgatatcGTCCTACATCATGACAGCCAACG
TP53LC13-Re	gtctttgtagtcggggatatcCGCTCTGCCGGACACCAA
TP53LC13+T-Fw	aagcttaaggaattcgatatcGTCCTACATCATTGACAGCCAACG
TP53LC14-Fw	aagcttaaggaattcgatatcGGCATAGGACATGATCCTAGCTTC
TP53LC14-Re	gtctttgtagtcggggatatcAAAGGCCTTGAGACGTTGGG
TP53LC14+T-Fw	aagcttaaggaattcgatatcGGCATAGGACATTGATCCTAGCTT
TP53LC14-R1	gacggcaatAGACATCAGAGAGGTCTGTGGAAAC
TP53LC14-F1	ctctgatgtctATTGCCGTCACCAAAAATATTCA
TP53LC15-Fw	aagcttaaggaattcgatatcACAGGGAGAGATGACTGAGTTAGATG
TP53LC15-Re	gtctttgtagtcggggatatcGCTATGCAAGAGCGGCGC
TP53LC16-Fw	aagcttaaggaattcgatatcGAGAGACTGGATGTCCATCAGGG
TP53LC16-Re	gtctttgtagtcggggatatcTGTTGCTTGTTCCTCTGATTTACC
TP53LC16+T-Fw	aagcttaaggaattcgatatcGAGAGACTGGATTGTCCATCAGG
TP53LC16-R1	acttcaatCAGGAGGTGACCCCTTCCC
TP53LC16-F1	ggtcacctcctgATTGAAGTTTCCGGTTCCGG
TP53LC17-Fw	aagcttaaggaattcgatatcCAGGTCATCGATGGAGGGG
TP53LC17-Re	gtctttgtagtcggggatatcCTGAAGTTTGGAGAAGCAGCTTC
TP53LC18-Fw	aagcttaaggaattcgatatcGGCAGATCAGATGCCTGAGC
TP53LC18-Re	gtctttgtagtcggggatatcTTCCTTTGGCTTCAGGGAGG
TP53LC18+T-Fw	aagcttaaggaattcgatatcGGCAGATCAGATTGCCTGAGC
TP53LC19-Fw	aagcttaaggaattcgatatcGACAAGACCAGGTACCTGTCGG
TP53LC19-Re	gtctttgtagtcggggatatcGTGAAGCAGGCGGTCACCT
TINCR-Fw	aagcttaaggaattcgatatcAGAGCTGGAGCCGGAGCC
TINCR-Re	gtctttgtagtcggggatatcCCTGGGGTCGCTGACGAG
TINCR+T-Fw	aagcttaaggaattcgatatcCGCCATTGGAGGGGCTGC
hMINION-Fw	aagcttaaggaattcgatatcTGGCCCTGCCATGCCCAC
hMINION-Re	gtctttgtagtcggggatatcCTTTTGGGGGCCTAACCTCT
hMINION+T-Fw	aagcttaaggaattcgatatcTGGCCCTGCCATTGCCCA
pCH-TP53LC04-Fw	aagcttaaggaattcgatatcCTCAATCCCTTGGTCTCTCTGATT
pCH-TP53LC04-Re	tttacgcgtcccggggatatcCTAAAGAAACTGACACAGGAGAATCAC
TP53-sg1-Fw	CACCGCAGTCACAGCACATGACGG
TP53-sg1-Re	AAACCCGTCATGTGCTGTGACTGC
TP53-sg2-Fw	CACCGATGGCCATGGCGCGGACGC
TP53-sg2-Re	AAACGCGTCCGCGCCATGGCCATC
wt-TP53LC01-Fw	TCGAGGACCTGAAGATGAATCCTGACTGCCTGGACATGCCTGGGCGGGTGTACCCATGA
wt-TP53LC01-Re	AGCTTCATGGGTACACCCGCCCAGGCATGTCCAGGCAGTCAGGATTCATCTTCAGGTCC
mTP53LC01-Fw	TCGAGGACCTGAAGATGAATCCTGATTACCTGGATATACCTGGGCGGGTGTACCCATGA
mTP53LC01-Re	AGCTTCATGGGTACACCCGCCCAGGTATATCCAGGTAATCAGGATTCATCTTCAGGTCC
wt-TP53LC02-Fw	TCGAGGCGACCTGTGCCTGGACATGCCCCTGCTACAGATAACTAGCCAGAGCCCATCCA
wt-TP53LC02-Re	AGCTTGGATGGGCTCTGGCTAGTTATCTGTAGCAGGGGCATGTCCAGGCACAGGTCGCC
mTP53LC02-Fw	TCGAGGCGACCTGTGCCTGGATATACCCCTGCTACAGATAATTAACCAGAGCCCATCCA
mTP53LC02-Re	AGCTTGGATGGGCTCTGGTTAATTATCTGTAGCAGGGGTATATCCAGGCACAGGTCGCC
wt-TP53LC03-Fw	TCGAGATGTCAGGAAGAGACGAGGCACGCCCAGACTTGGGCAGGTCCCTCCCTTTCTGA
wt-TP53LC03-Re	AGCTTCAGAAAGGGAGGGACCTGCCCAAGTCTGGGCGTGCCTCGTCTCTTCCTGACATC
mTP53LC03-Fw	TCGAGATGTCAGGAAGAGACGAGGTACACCCAGATTTAGGCAGGTCCCTCCCTTTCTGA
mTP53LC03-Re	AGCTTCAGAAAGGGAGGGACCTGCCTAAATCTGGGTGTACCTCGTCTCTTCCTGACATC
wt-TP53LC04-Fw	TCGAGTATTTGCCCTGGCATGCTTATACTGGTCCAAGCAAGCATTAGGTCATAGCCTGA
wt-TP53LC04-Re	AGCTTCAGGCTATGACCTAATGCTTGCTTGGACCAGTATAAGCATGCCAGGGCAAATAC
mTP53LC04-Fw	TCGAGTATTTGCCCTGGTATACTTATACTGGTCCAAGTAAACATTAGGTCATAGCCTGA
mTP53LC04-Re	AGCTTCAGGCTATGACCTAATGTTTACTTGGACCAGTATAAGTATACCAGGGCAAATAC
wt-TP53LC05-Fw	TCGAGGGACCTGTGGCTTAGCGCGCTCCGCCCGGGCTTGTCTGCCCGCGGGGGCGCAGA
wt-TP53LC05-Re	AGCTTCTGCGCCCCCGCGGGCAGACAAGCCCGGGCGGAGCGCGCTAAGCCACAGGTCCC
mTP53LC05-Fw	TCGAGGGACCTGTGGCTTAGCGCGTTCCACCCGGGTTTATCTGCCCGCGGGGGCGCAGA
mTP53LC05-Re	AGCTTCTGCGCCCCCGCGGGCAGATAAACCCGGGTGGAACGCGCTAAGCCACAGGTCCC
wt-TP53LC07-Fw	TCGAGCTTGTCTGAATATGCCTAGGCATGCCTGAACTTGCTACAACCCCAGTCCACATA
wt-TP53LC07-Re	AGCTTATGTGGACTGGGGTTGTAGCAAGTTCAGGCATGCCTAGGCATATTCAGACAAGC
mTP53LC07-Fw	TCGAGCTTGTCTGAATATGCCTAGGTATACCTGAATTTACTACAACCCCAGTCCACATA
mTP53LC07-Re	AGCTTATGTGGACTGGGGTTGTAGTAAATTCAGGTATACCTAGGCATATTCAGACAAGC
wt-TP53LC08-Fw	TCGAGTGACAGGAGAGCTGGGAGCTGTCCCGACATGTCCTGGTTTGCCCCTCCCCCAGA
wt-TP53LC08-Re	AGCTTCTGGGGGAGGGGCAAACCAGGACATGTCGGGACAGCTCCCAGCTCTCCTGTCAC
mTP53LC08-Fw	TCGAGTGACAGGAGAGCTGGGAGTTATCCCGATATATCCTGGTTTGCCCCTCCCCCAGA
mTP53LC08-Re	AGCTTCTGGGGGAGGGGCAAACCAGGATATATCGGGATAACTCCCAGCTCTCCTGTCAC
wt-TP53LC09-Fw	TCGAGTGCATACTGGCAGCGACAAGTTGAGACTTGTTCAACTTGACACAGTCCTGTGGA
wt-TP53LC09-Re	AGCTTCCACAGGACTGTGTCAAGTTGAACAAGTCTCAACTTGTCGCTGCCAGTATGCAC
mTP53LC09-Fw	TCGAGTGCATACTGGCAGCGATAAATTGAGATTTATTCAACTTGACACAGTCCTGTGGA
mTP53LC09-Re	AGCTTCCACAGGACTGTGTCAAGTTGAATAAATCTCAATTTATCGCTGCCAGTATGCAC
wt-TP53LC12-Fw	TCGAGGATTTAGATTTCAAATTAACATGTCATGACAGGCCCCATTCCTTTGTCTGTCGA
wt-TP53LC12-Re	AGCTTCGACAGACAAAGGAATGGGGCCTGTCATGACATGTTAATTTGAAATCTAAATCC
mTP53LC12-Fw	TCGAGGATTTAGATTTCAAATTAATATATCATGATAGACCCCATTCCTTTGTCTGTCGA
mTP53LC12-Re	AGCTTCGACAGACAAAGGAATGGGGTCTATCATGATATATTAATTTGAAATCTAAATCC
wt-TP53LC18-Fw	TCGAGAGAAGCAGCCCGGCTCGGAACAAGCCCAGGCAAGCCCAGGCAGAGCCCGCCGCA
wt-TP53LC18-Re	AGCTTGCGGCGGGCTCTGCCTGGGCTTGCCTGGGCTTGTTCCGAGCCGGGCTGCTTCTC
mTP53LC18-Fw	TCGAGAGAAGCAGCCCGGCTCGGAATAAACCCAGGTAAACCCAGGCAGAGCCCGCCGCA
mTP53LC18-Re	AGCTTGCGGCGGGCTCTGCCTGGGTTTACCTGGGTTTATTCCGAGCCGGGCTGCTTCTC
Re-TP53LC04-1-Fw	tgctggaattctgcagatatcAGGATTGGAGATGACAGATTTACTGTC
Re-TP53LC04-1-R1	attgcactggGCAGCTAGACAGGGTGCTGG
Re-TP53LC04-1-F1	gtctagctgcCCAGTGCAATCGAGGATGGG
Re-TP53LC04-1-Re	gccgccagtgtgatggatatcCTAAAGAAACTGACACAGGAGAATCAC
Primer sequences for detection of the mutation of TP53 gene
TP53-KO-Fw	TGTTTGTTTCTTTGCTGCCG
TP53-KO-Re	GACAACCACCCTTAACCCCT
Primer sequences for TP53 ChIP-qPCR
GENE NAME	FORWARD	REVERSE
TP53LC01	TATCACCTCCCACCCTCCA	CCACAGGAAAAGCACGCC
TP53LC02	TGAGCGACCTGTGCCTGG	GCCTCAAACAGAGATTTACCCA
TP53LC03	TACAGTAAGCTCTTTTGTGGCAC	TGTCAATCAAAGCGAAACCA
TP53LC04	TATTTGCCCTGGCATGCT	CATCCACCCTACTGCTGTATCC
TP53LC05	GCGGGGACCTGTGGCTTA	CTGAGGCAGGATCTTTTTGG
TP53LC07	ATCCAGTTTCCCCATTCTTTAT	GGGAGGTGAGAAGAGAGAGAAAG
TP53LC08	AGAGAGAAAAGGCAAAAGGTCA	GAGCCCTGGAAAAGCGTC
TP53LC09	TGTGTCTGCTGTGTTGTCTGTT	GGATTCTGTATTTGTCCTTCTGC
TP53LC12	TGTGGAAGGAAAGACCAAATG	CACATAGCCTCACTTCCCTTC
TP53LC18	GCAAACTTTCGCACGGAC	CACGAGCAGGAAGGAGGAC
BBC3	GCACACACGTCGGAGCATG	AAACCAGAGCAGGGCAGGA
shRNA sequences for the related genes
GENE NAME	Sequence (5'- 3')
sh-TP53LC04-1	TGCCTGGCAGCGCAATGGAAC
sh-TP53LC04-2	CTCCCAAGTTCAAGTGATTCT
sh-TP53LC02	GGAGCGCACTCACCTCAGACG
sh-TP53	GACTCCAGTGGTAATCTAC
sh-LacZ	CGCTAAATACTGGCAGGCGTT
