# Supplementary material for: TP53-inducible putative long noncoding RNAs encode functional polypeptides that suppress cell proliferation
Source: HighWire-hosted journal article supplement (doi:10.1101/gr.275831.121), 2022-05-24
Supplement: Supplemental_Table_S11.docx [file Supplemental_Table_S11.docx]

**Supplemental Table S11.** **List of the corresponding TP53LC gene ORFs and frameshift mutation sequences used in this study.**

| **Gene Name** | **5’UTR-ORF or 5’UTR-ORF-FS sequences** |
| --- | --- |
| TP53LC01 | TGAAGATGAATCCTGACTGCCTGGACATGCCTGGGCGGGTGTACCCATGGCCTGTGGTTGAACCAGCCACACCTTGTCTCTTGGCCAGAGGCTGCCCTGAGGCTGAGGGCTGTGAGTCCTGGGATCTGCTGGGGAAGTCCAAGGCATATCGCACCAGCTGCCCC |
| TP53LC01-FS | TGAAGATTGAATCCTGACTGCCTGGACATGCCTGGGCGGGTGTACCCATGGCCTGTGGTTGAACCAGCCACACCTTGTCTCTTGGCCAGAGGCTGCCCTGAGGCTGAGGGCTGTGAGTCCTGGGATCTGCTGGGGAAGTCCAAGGCATATCGCACCAGCTGCCCC |
| TP53LC02 | CAAAATGGTGGCGCCGAGGCGGAGGCCGGCGCACCTGGGGGCGCCACACGCCCTACGGGATCCCCGCAGACCGCCGCCAGCTGGACGCGAGCCCCGGGTCCAGGCGGCCCGCACTGGTCTGCGCCAGGCCCAGCCCGCAGGGGCCGCCCACAGCCGGTGGCCCGCGTCGCCGCTCGGTGTCCGCGGGTCTGGTGCTGGCGGGGGCGCGGGGCCCGGCGCGGCCGTCTCGGCCTCACCCAGCGGTCCGCGCCGGGGAGAGGGAGCGCACTCACCTCAGACGCGCCCCGGGAGCCGCTGGAAGAGCCCGGGAAAGGAGGCGGAGCCGCGCGAA |
| TP53LC02-FS1 | CAAAATTGGTGGCGCCGAGGCGGAGGCCGGCGCACCTGGGGGCGCCACACGCCCTACGGGATCCCCGCAGACCGCCGCCAGCTGGACGCGAGCCCCGGGTCCAGGCGGCCCGCACTGGTCTGCGCCAGGCCCAGCCCGCAGGGGCCGCCCACAGCCGGTGGCCCGCGTCGCCGCTCGGTGTCCGCGGGTCTGGTGCTGGCGGGGGCGCGGGGCCCGGCGCGGCCGTCTCGGCCTCACCCAGCGGTCCGCGCCGGGGAGAGGGAGCGCACTCACCTCAGACGCGCCCCGGGAGCCGCTGGAAGAGCCCGGGAAAGGAGGCGGAGCCGCGCGAA |
| TP53LC02-FS2 | CAAAATTGTGGCGCCGAGGCGGAGGCCGGCGCACCTGGGGGCGCCACACGCCCTACGGGATCCCCGCAGACCGCCGCCAGCTGGACGCGAGCCCCGGGTCCAGGCGGCCCGCACTGGTCTTGCGCCAGGCCCAGCCCGCAGGGGCCGCCCACAGCCGGTGGCCCGCGTCGCCGCTCGGTGTCCGCGGGTCTGGTGCTGGCGGGGGCGCGGGGCCCGGCGCGGCCGTCTCGGCCTCACCCAGCGGTCCGCGCCGGGGAGAGGGAGCGCACTCACCTCAGACGCGCCCCGGGAGCCGCTGGAAGAGCCCGGGAAAGGAGGCGGAGCCGCGCGAA |
| TP53LC03 | GTCTAGGGGTATGATTCTCGCTTCGGGTGCGAGAGGTCCCGGGTTCAAATCCCGGACGAGCCCTCCTTTACCTTTTACTGAGACAAGAGTGTCTTCAAGGAATAGGTTACCTGACCAGCGCTGCAGGAGGCTTGACTGTAAGTCATCAATGTACAGTAAGCTCTTTTGTGGCACCGCGGTAGCAGAAAGCATCTCAATCCCCAGACCCGCCTGGCATGTCAGGAAGAGACGAGGCACGCCCAGACTTGGGCAGGTCCCTCCCTTTCTGCTTCCTGACTTCCTTCCTGGTGTCTCAACTCGGCCACCACAGCCTGGTTTCGCTTTGATTGACACGCGTCAATCTATAGTTGTGGATGACAGTGTTCGGGAGAGCCCAGGAACTGTCAAAACTTGGTTCTCTGCAGTCCTGAAGGCACTCTGTCTCTTTCGGTCACTCCATCTGACGATTGGTGCC |
| TP53LC03-FS1 | GTCTAGGGGTATTGATTCTCGCTTCGGGTGCGAGAGGTCCCGGGTTCAAATCCCGGACGAGCCCTCCTTTACCTTTTACTGAGACAAGAGTGTCTTCAAGGAATAGGTTACCTGACCAGCGCTGCAGGAGGCTTGACTGTAAGTCATCAATGTACAGTAAGCTCTTTTGTGGCACCGCGGTAGCAGAAAGCATCTCAATCCCCAGACCCGCCTGGCATGTCAGGAAGAGACGAGGCACGCCCAGACTTGGGCAGGTCCCTCCCTTTCTGCTTCCTGACTTCCTTCCTGGTGTCTCAACTCGGCCACCACAGCCTGGTTTCGCTTTGATTGACACGCGTCAATCTATAGTTGTGGATGACAGTGTTCGGGAGAGCCCAGGAACTGTCAAAACTTGGTTCTCTGCAGTCCTGAAGGCACTCTGTCTCTTTCGGTCACTCCATCTGACGATTGGTGCC |
| TP53LC03-FS2 | GTCTAGGGGTATTGATTCTCGCTTCGGGTGCGAGAGGTCCCGGGTTCAAATCCCGGACGAGCCCTCCTTTACCTTTTACTGAGACAAGAGTGTCTTCAAGGAATAGGTTACCTGACCAGCGCTGCAGGAGGCTTGACTGTAAGTCATCAATTGTACAGTAAGCTCTTTTGTGGCACCGCGGTAGCAGAAAGCATCTCAATCCCCAGACCCGCCTGGCATGTCAGGAAGAGACGAGGCACGCCCAGACTTGGGCAGGTCCCTCCCTTTCTGCTTCCTGACTTCCTTCCTGGTGTCTCAACTCGGCCACCACAGCCTGGTTTCGCTTTGATTGACACGCGTCAATCTATAGTTGTGGATGACAGTGTTCGGGAGAGCCCAGGAACTGTCAAAACTTGGTTCTCTGCAGTCCTGAAGGCACTCTGTCTCTTTCGGTCACTCCATCTGACGATTGGTGCC |
| TP53LC04 | CTCAATCCCTTGGTCTCTCTGATTCCTTATATATCCCGATACATTTCTGGGGGCTCATCAGGATTGGAGATGACAGATTTACTGTCCCCTTTGCCTGCGATACTAGGTCCCCGGGGCCAGGAGAGACCCGGCATCCAAGGTGTGCCACAGCTGAGCTTCACCCGGATATATAGACCAGCTCTCCCCACGTCCCAGCACCCTGCCTGGCAGCGCAATGGAACCGAGGATGGGGCTGCAGGACGATACCAGCACTTCAGGAACTGTGACAGAATCTTGCTCCGCTGCCAAGGCTGGAGTGCACTGGTTCAATCTCGGCTCACTGCAAACTCTGCCTCCCAAGTTCAAGTGATTCTCCTGTGTCAGTTTCTT |
| TP53LC04-FS | AGGATTGGAGATTGACAGATTTACTGTCCCCTTTGCCTGCGATACTAGGTCCCCGGGGCCAGGAGAGACCCGGCATCCAAGGTGTGCCACAGCTGAGCTTCACCCGGATATATAGACCAGCTCTCCCCACGTCCCAGCACCCTGCCTGGCAGCGCAATGGAACCGAGGATGGGGCTGCAGGACGATACCAGCACTTCAGGAACTGTGACAGAATCTTGCTCCGCTGCCAAGGCTGGAGTGCACTGGTTCAATCTCGGCTCACTGCAAACTCTGCCTCCCAAGTTCAAGTGATTCTCCTGTGTCAGTTTCTT |
| TP53LC04-Mt1 | AGGATTGGAGATTACAGATTTACTGTCCCCTTTGCCTGCGATACTAGGTCCCCGGGGCCAGGAGAGACCCGGCATCCAAGGTGTGCCACAGCTGAGCTTCACCCGGATATATAGACCAGCTCTCCCCACGTCCCAGCACCCTGCCTGGCAGCGCAATGGAACCGAGGATGGGGCTGCAGGACGATACCAGCACTTCAGGAACTGTGACAGAATCTTGCTCCGCTGCCAAGGCTGGAGTGCACTGGTTCAATCTCGGCTCACTGCAAACTCTGCCTCCCAAGTTCAAGTGATTCTCCTGTGTCAGTTTCTT |
| TP53LC04-Mt2 | AGGATTGGAGACAGATTTACTGTCCCCTTTGCCTGCGATACTAGGTCCCCGGGGCCAGGAGAGACCCGGCATCCAAGGTGTGCCACAGCTGAGCTTCACCCGGATATATAGACCAGCTCTCCCCACGTCCCAGCACCCTGCCTGGCAGCGCAATGGAACCGAGGATGGGGCTGCAGGACGATACCAGCACTTCAGGAACTGTGACAGAATCTTGCTCCGCTGCCAAGGCTGGAGTGCACTGGTTCAATCTCGGCTCACTGCAAACTCTGCCTCCCAAGTTCAAGTGATTCTCCTGTGTCAGTTTCTT |
| TP53LC05 | AGCGGCGGCGATGCTAATCAGGCCGCTAAGATGGAAAAGCATCCCCGAAGACCGGGAGGAACGCCGCGGGGACCTGTGGCTTAGCGCGCTCCGCCCGGGCTTGTCTGCCCGCGGGGGCGCAGCGGCTGAGGCGGCTCCGGGCCGGAGTTCCAATCAAGCGCCACCCAACTCCCAGTCGGGGGCCGAGGCCAGCGCCGGGATGCCAGCTTCCCCCAAAAAGATCCTGCCTCAGGGAAATGCATGGAGCCGGCGGAAAAGCCCGCGGCGCCCCCGGCGGATCGCAGACCCTAAGGGGGCGGGAGGTGGCGCCCCAGTCCCAACCTCT |
| TP53LC05-FS1 | AGCGGCGGCGATTGCTAATCAGGCCGCTAAGATGGAAAAGCATCCCCGAAGACCGGGAGGAACGCCGCGGGGACCTGTGGCTTAGCGCGCTCCGCCCGGGCTTGTCTGCCCGCGGGGGCGCAGCGGCTGAGGCGGCTCCGGGCCGGAGTTCCAATCAAGCGCCACCCAACTCCCAGTCGGGGGCCGAGGCCAGCGCCGGGATGCCAGCTTCCCCCAAAAAGATCCTGCCTCAGGGAAATGCATGGAGCCGGCGGAAAAGCCCGCGGCGCCCCCGGCGGATCGCAGACCCTAAGGGGGCGGGAGGTGGCGCCCCAGTCCCAACCTCT |
| TP53LC05-FS2 | AGCGGCGGCGATTGCTAATCAGGCCGCTAAGATGGAAAAGCATCCCCGAAGACCGGGAGGAACGCCGCGGGGACCTGTGGCTTAGCGCGCTCCGCCCGGGCTTGTCTGCCCGCGGGGGCGCAGCGGCTGAGGCGGCTCCGGGCCGGAGTTCCAATCAAGCGCCACCCAACTCCCAGTCGGGGGCCGAGGCCAGCGCCGGGATTCCAGCTTCCCCCAAAAAGATCCTGCCTCAGGGAAATGCATGGAGCCGGCGGAAAAGCCCGCGGCGCCCCCGGCGGATCGCAGACCCTAAGGGGGCGGGAGGTGGCGCCCCAGTCCCAACCTCT |
| TP53LC06 | GGCACGGGCCATGCCTGAACCTTCTTCCACCGCCGCGCCCCGGGCCCGCGCCCCGCCGGCCGCCCGCACTGGGTCCCGCGTCGCCCCCGCCACCACACCGAGCCGCCCAGTACCTCCTCCTCCTGAAGGCAGAGCTGGGGGTCCGTACGGAGGAACTTCAGAGGCTGGAAGCACGCTTGAAAAAGAAAGGGGGCCTGGGCTTTGCACCAGCTTCAGGATTGCGTACTTGTTTCCTCATCCG |
| TP53LC06-FS | GGCACGGGCCATTGCCTGAACCTTCTTCCACCGCCGCGCCCCGGGCCCGCGCCCCGCCGGCCGCCCGCACTGGGTCCCGCGTCGCCCCCGCCACCACACCGAGCCGCCCAGTACCTCCTCCTCCTGAAGGCAGAGCTGGGGGTCCGTACGGAGGAACTTCAGAGGCTGGAAGCACGCTTGAAAAAGAAAGGGGGCCTGGGCTTTGCACCAGCTTCAGGATTGCGTACTTGTTTCCTCATCCG |
| TP53LC07 | CTGAATTTTCATGGCCATGGGACAAAGAACCCCGTCTTTAGCTGAATTAAGGAAAAGTTCTGCAACATTTTTGACGTGCAACTTGGGGGCTCAAGCGGAGAAGCGGACGGATCAGCAGCTCCCTGCCACTGTCCCCTCCCTGCCAGGGCTGGGACACATGGCTCAAGGCGCTGCAGAAGGCTGGCTGGCGTTTTCTACCATGTGCCCATGGAATCTCCTCCCACAGTCAGGGAGCCCAGCTCCAACCCACAGCAATTACACTTCTCCCCCTGGTGAAGGAAACACTTGCATAAGAATAAGAGGTTCTTCCACAGGCATTTTAAAACCTTTTTTCTTTCCTCTTCTCCACAATATCAGCATT |
| TP53LC07-FS | CTGAATTTTCATTGGCCAGGGACAAAGAACCCCGTCTTTAGCTGAATTAAGGAAAAGTTCTGCAACATTTTTGACGTGCAACTTGGGGGCTCAAGCGGAGAAGCGGACGGATCAGCAGCTCCCTGCCACTGTCCCCTCCCTGCCAGGGCTGGGACACATGGCTCAAGGCGCTGCAGAAGGCTGGCTGGCGTTTTCTACCATGTGCCCATGGAATCTCCTCCCACAGTCAGGGAGCCCAGCTCCAACCCACAGCAATTACACTTCTCCCCCTGGTGAAGGAAACACTTGCATAAGAATAAGAGGTTCTTCCACAGGCATTTTAAAACCTTTTTTCTTTCCTCTTCTCCACAATATCAGCATT |
| TP53LC08 | GCTTGGGACCATGTGCCCGCGCTCGCTCCGGGCCGCCACCCAGCGCCTCCGGTGGCTGCGCGGGCGCCCCAAGTGTTCGTGTGTCTGCGGCGGGTGGGCGTCCGGCTCGCGCTGCCAAGCGCCCCAAGTTGCCGCCGCGCCCCGCAGCGGGGACGCGAAGCCGGCGCGGGGCGGGTGTATTTACCTGCCGCCAAGACCTTCATTATGGGCTGCACTTCAGAGGGCCTTGGAGGAAACCTCAGATGCCGGCAGTTTTCAGAGGTTCATGCTCAAATGGGGAATTTGCCTGATTTATATACTGGAGCCTGTGTTG |
| TP53LC08-FS | GCTTGGGACCATTGTGCCCGCGCTCGCTCCGGGCCGCCACCCAGCGCCTCCGGTGGCTGCGCGGGCGCCCCAAGTGTTCGTGTGTCTGCGGCGGGTGGGCGTCCGGCTCGCGCTGCCAAGCGCCCCAAGTTGCCGCCGCGCCCCGCAGCGGGGACGCGAAGCCGGCGCGGGGCGGGTGTATTTACCTGCCGCCAAGACCTTCATTATGGGCTGCACTTCAGAGGGCCTTGGAGGAAACCTCAGATGCCGGCAGTTTTCAGAGGTTCATGCTCAAATGGGGAATTTGCCTGATTTATATACTGGAGCCTGTGTTG |
| TP53LC09 | CCGAGCACATGGGCCCGCGGGCCGGGCGGGCTCGGGGCGGCCGGGACGAGGAGGGGCGACGACGAGCTGCGAGCAAAGATGTGCCCCGGGACCCCCGGCACCTTCCAGTGGATTTCCTTGCGGAAAGGATGTTGGCGGTCCCTGTGACCTGTGGAGACACGGCCAGATCTGCCCTCCAGCCTGATCTTTTGGCCAGAAGGAGATTAAAAAGATGCCCCTCAAGATGGCTGTGCCTGTCAGCTGCATGGAGCTTCGTTCAAGTATTTTCTGAGCCTGATGGATTTACAGTGATCTTCAGTGGTCTGGGGAATAACGCTGGTGGAACCATGCACTGGAATGACACACGCCCGGCACATTTCAGGATACTAAAAGTGGTTTTAAGGGAGGCTGTGGCTGAATGCCTCATGGATTCTTACAGCTTGGATGTCCATGGGGGACGAAGGACTGCAGCTGGC |
| TP53LC09-FS1 | CCGAGCACATTGGGCCCGCGGGCCGGGCGGGCTCGGGGCGGCCGGGACGAGGAGGGGCGACGACGAGCTGCGAGCAAAGATGTGCCCCGGGACCCCCGGCACCTTCCAGTGGATTTCCTTGCGGAAAGGATGTTGGCGGTCCCTGTGACCTGTGGAGACACGGCCAGATCTGCCCTCCAGCCTGATCTTTTGGCCAGAAGGAGATTAAAAAGATGCCCCTCAAGATGGCTGTGCCTGTCAGCTGCATGGAGCTTCGTTCAAGTATTTTCTGAGCCTGATGGATTTACAGTGATCTTCAGTGGTCTGGGGAATAACGCTGGTGGAACCATGCACTGGAATGACACACGCCCGGCACATTTCAGGATACTAAAAGTGGTTTTAAGGGAGGCTGTGGCTGAATGCCTCATGGATTCTTACAGCTTGGATGTCCATGGGGGACGAAGGACTGCAGCTGGC |
| TP53LC09-FS2 | CCGAGCACATTGGCCCGCGGGCCGGGCGGGCTCGGGGCGGCCGGGACGAGGAGGGGCGACGACGAGCTGCGAGCAAAGATGTGCCCCGGGACCCCCGGCACCTTCCAGTGGATTTCCTTGCGGAAAGGATTGTTGGCGGTCCCTGTGACCTGTGGAGACACGGCCAGATCTGCCCTCCAGCCTGATCTTTTGGCCAGAAGGAGATTAAAAAGATGCCCCTCAAGATGGCTGTGCCTGTCAGCTGCATGGAGCTTCGTTCAAGTATTTTCTGAGCCTGATGGATTTACAGTGATCTTCAGTGGTCTGGGGAATAACGCTGGTGGAACCATGCACTGGAATGACACACGCCCGGCACATTTCAGGATACTAAAAGTGGTTTTAAGGGAGGCTGTGGCTGAATGCCTCATGGATTCTTACAGCTTGGATGTCCATGGGGGACGAAGGACTGCAGCTGGC |
| TP53LC10 | CGGGAGCCTCATGCAAACTGGTCCCGTTCTACAGACGAGGAAACTGAGGCACAGAGTGATTACGGCTGTCCCTGAGCTCCTGCAGCCAGTAAGTGTCTCTGAGGATGAACTGCCATGTGCCCGGCGGGGATGCCGTCCCTGGCCCTTGCTGAGTGCCTCTGGGACGAGGTCAGCTGAGCCTGCCATCCTAACTCAGACACCATCTCACTCTCCAAGTCCCTTCTCGGCCCAGCAAATTCTCACCTCCAGAGGCCAGGTCTGCCCCGCAGGTCTTAGGAAATACAGCCCTACTTCCATCCAGCACACCAACCCAAGGAAGTGCCTCGGAGCCCTGGGGCCCGAGGGGGGCCTGGCCTTGGTCTCACGGCGGCAGCTCCACCTGGAGAGGAGTGAACTCAAGCCAGGACGCCCCGTCTCCACAGCGGAAACCGTGTTGCCGGCTGCTCCCTCCTGGGGACTCTGGGCC |
| TP53LC10-FS1 | CGGGAGCCTCATTGCAAACTGGTCCCGTTCTACAGACGAGGAAACTGAGGCACAGAGTGATTACGGCTGTCCCTGAGCTCCTGCAGCCAGTAAGTGTCTCTGAGGATGAACTGCCATGTGCCCGGCGGGGATGCCGTCCCTGGCCCTTGCTGAGTGCCTCTGGGACGAGGTCAGCTGAGCCTGCCATCCTAACTCAGACACCATCTCACTCTCCAAGTCCCTTCTCGGCCCAGCAAATTCTCACCTCCAGAGGCCAGGTCTGCCCCGCAGGTCTTAGGAAATACAGCCCTACTTCCATCCAGCACACCAACCCAAGGAAGTGCCTCGGAGCCCTGGGGCCCGAGGGGGGCCTGGCCTTGGTCTCACGGCGGCAGCTCCACCTGGAGAGGAGTGAACTCAAGCCAGGACGCCCCGTCTCCACAGCGGAAACCGTGTTGCCGGCTGCTCCCTCCTGGGGACTCTGGGCC |
| TP53LC10-FS2 | CGGGAGCCTCATTGCAAACTGGTCCCGTTCTACAGACGAGGAAACTGAGGCACAGAGTGATTACGGCTGTCCCTGAGCTCCTGCAGCCAGTAAGTGTCTCTGAGGATGAACTGCCATGTGCCCGGCGGGGATGCCGTCCCTGGCCCTTGCTTGAGTGCCTCTGGGACGAGGTCAGCTGAGCCTGCCATCCTAACTCAGACACCATCTCACTCTCCAAGTCCCTTCTCGGCCCAGCAAATTCTCACCTCCAGAGGCCAGGTCTGCCCCGCAGGTCTTAGGAAATACAGCCCTACTTCCATCCAGCACACCAACCCAAGGAAGTGCCTCGGAGCCCTGGGGCCCGAGGGGGGCCTGGCCTTGGTCTCACGGCGGCAGCTCCACCTGGAGAGGAGTGAACTCAAGCCAGGACGCCCCGTCTCCACAGCGGAAACCGTGTTGCCGGCTGCTCCCTCCTGGGGACTCTGGGCC |
| TP53LC11 | GCCTGAAGGGATGTACAGCTCCCGGGTGGCCCAACGCCTAAAGCGAATGCCAGCAGCCGGGGCCTCCGCTCCACCTTCCTCATCTGGGCTGCCAGGCGCTGGGCTGCGTTGCCTGCTCAGGCTCTCCCGAACCACCGACTCCACAGCCTTCTCCATCTCACTGGCCTCATCTTTGCTCAGCTCCTCCAGGTCTAACCGATCGGCATCCACAGTTTGTGAGACGTTGACTTCAGCAACCAGGGTCACGGAACTGCCACCAGCACCCTGGACCTTCTTGACATCCACGGAAACGCTCCCCGGCCCACCCTGCCCCTCTCTGGTGAGGGCGGACAGCTCCTCCCTCATGCGCTCGGGAAGGGTTTCCTCCAGCTGCCCGATGACCTCCACCAGCTGCTGCCGGGGCTCCTTGGAGGAGATGCCCTTCATGGAGGTGTGGAATTCGTGGGGTATTTTAATTTCTTTTTCAATGACTGTGGGTTCGGCA |
| TP53LC11-FS | GCCTGAAGGGATGTACAGCTCCCGGGTGGCCCAACGCCTAAAGCGAATGCCAGCAGCCGGGGCCTCCGCTCCACCTTCCTCATCTGGGCTGCCAGGCGCTGGGCTGCGTTGCCTGCTCAGGCTCTCCCGAACCACCGACTCCACAGCCTTCTCCATCTCACTGGCCTCATCTTTGCTCAGCTCCTCCAGGTCTAACCGATCGGCATCCACAGTTTGTGAGACGTTGACTTCAGCAACCAGGGTCACGGAACTGCCACCAGCACCCTGGACCTTCTTGACATCCACGGAAACGCTCCCCGGCCCACCCTGCCCCTCTCTGGTGAGGGCGGACAGCTCCTCCCTCATGCGCTCGGGAAGGGTTTCCTCCAGCTGCCCGATGACCTCCACCAGCTGCTGCCGGGGCTCCTTGGAGGAGATGCCCTTCATGGAGGTGTGGAATTCGTGGGGTATTTTAATTTCTTTTTCAATTGACTGTGGGTTCGGCA |
| TP53LC12 | AGCTTCCTGCATGATGCTGGGGAGCTTGGCGCCTGACCCAGGATCTAGAAGGCACTCTGGGCAGGCCGCGCTCCGCCCACGAAGGTACCCAACCCTCTGGGATAGATGCAGGAAGCGATGGTTAAGACCCATTTTCACCCAACTTCTCGCCGCAGGTCTGGCTTACCACACGCTCCTCCCCATTCCCAGTGAGCCGCTTTTTGCAGCACCAGGCGAACACTTACACCAGTGCTTTGTAAAGGAATCTTATTGTCCACCCCGTGTCTTGGCAAAAGAACAG |
| TP53LC12-FS | AGCTTCCTGCATGATGTCTGGGGAGCTTGGCGCCTGACCCAGGATCTAGAAGGCACTCTGGGCAGGCCGCGCTCCGCCCACGAAGGTACCCAACCCTCTGGGATAGATGCAGGAAGCGATGGTTAAGACCCATTTTCACCCAACTTCTCGCCGCAGGTCTGGCTTACCACACGCTCCTCCCCATTCCCAGTGAGCCGCTTTTTGCAGCACCAGGCGAACACTTACACCAGTGCTTTGTAAAGGAATCTTATTGTCCACCCCGTGTCTTGGCAAAAGAACAG |
| TP53LC13 | GTCCTACATCATGACAGCCAACGCGTCCATCCTGCGCCTCCCCGCAGGCCTTGCTCCCCGCTCGGTCCCTCCCGGCCGCGGCGCTGCCGGAAGTGCGTGTCGGCGCGGGGGCGGATCCCGGTGGCGGCGAGGGGCGGACTCCGCGGACAAGGCCAGGCCTAGCCTTGAGCTCCGTCGGGCAGGGCCGCCGGGATTGGTGTCCGGCAGAGCG |
| TP53LC13-FS | GTCCTACATCATTGACAGCCAACGCGTCCATCCTGCGCCTCCCCGCAGGCCTTGCTCCCCGCTCGGTCCCTCCCGGCCGCGGCGCTGCCGGAAGTGCGTGTCGGCGCGGGGGCGGATCCCGGTGGCGGCGAGGGGCGGACTCCGCGGACAAGGCCAGGCCTAGCCTTGAGCTCCGTCGGGCAGGGCCGCCGGGATTGGTGTCCGGCAGAGCG |
| TP53LC14 | GGCATAGGACATGATCCTAGCTTCCCACAGGGCACTTGGGATTGTGCAGTCAGAAGTGATTGATGTGCATATGTTTCCACAGACCTCTCTGATGTCTATGCCGTCACCAAAAATATTCAGACTGCAAACCAGGAAATGCATTGAATTGCCACCATTGTCCTTATACTTCCGTTTAAGGACACTCCAGGCCCAACGTCTCAAGGCCTTT |
| TP53LC14-FS | GGCATAGGACATTGATCCTAGCTTCCCACAGGGCACTTGGGATTGTGCAGTCAGAAGTGATTGATGTGCATATGTTTCCACAGACCTCTCTGATGTCTATTGCCGTCACCAAAAATATTCAGACTGCAAACCAGGAAATGCATTGAATTGCCACCATTGTCCTTATACTTCCGTTTAAGGACACTCCAGGCCCAACGTCTCAAGGCCTTT |
| TP53LC15 | ACAGGGAGAGATGACTGAGTTAGATGAGACGAGGGGGCGGGCTGGGGGTGCGAGAAGGAAGCTTGGCAAGGAGACTAGGTCTAGGGGGACCACAGTGGGGCAGGCTGCATGGAAAATATCCGCAGGGTCCCCCAGGCAGAACAGCCACGCTCCAGGCCAGGCTGTCCCTACTGCCTGGTGGAGGGGGAACTTGACCTCTGGGAGGGCGCCGCTCTTGCATAGC |
| TP53LC16 | GAGAGACTGGATGTCCATCAGGGTCACGCTTGCAGGGCAACGAGAGGCAAAACAAGAGGGAAGACGACTTTCCTCCTGTGAGCCAATGAGGCCAGCTGGACTACGCCGAGACAACTGGGAGAGGCGCGGGACTCGCCCGTTCCGCGGAACGCCGGGAAGGGGTCACCTCCTGATGAAGTTTCCGGTTCCGGTGTCAGCGGCGGTTGAATTGCCATGGCAATGCGATTCATTGATTCCAGGTAAATCAGAGGAACAAGCAACA |
| TP53LC16-FS | GAGAGACTGGATTGTCCATCAGGGTCACGCTTGCAGGGCAACGAGAGGCAAAACAAGAGGGAAGACGACTTTCCTCCTGTGAGCCAATGAGGCCAGCTGGACTACGCCGAGACAACTGGGAGAGGCGCGGGACTCGCCCGTTCCGCGGAACGCCGGGAAGGGGTCACCTCCTGATTGAAGTTTCCGGTTCCGGTGTCAGCGGCGGTTGAATTGCCATGGCAATGCGATTCATTGATTCCAGGTAAATCAGAGGAACAAGCAACA |
| TP53LC17 | CAGGTCATCGATGGAGGGGTCAGCCTACAAGGACACAGCCAAGTTCATGTTCTTTGGGAGGTGGCAGCCAAGGACTTGGTGCACTGCAAGGAGGTCAGGGAAACAGAGACAGAGAAGCTGCTTCTCCAAACTTCAG |
| TP53LC18 | GGCAGATCAGATGCCTGAGCATTCAGAAGCAACAGCTGTGGAGCCCCCGTGGGTTCAGAAGGCCTGGTTCCCGTCTCCAGAAGCCTGGCTCTCCTCCCTCCTGGGCCCACTACTTTGGCTTCTTGTTCCTACGTACAAGGAGTTGCGAAGAAGGCAACTCTTCCCCTCCCTGAAGCCAAAGGAA |
| TP53LC18-FS | GGCAGATCAGATTGCCTGAGCATTCAGAAGCAACAGCTGTGGAGCCCCCGTGGGTTCAGAAGGCCTGGTTCCCGTCTCCAGAAGCCTGGCTCTCCTCCCTCCTGGGCCCACTACTTTGGCTTCTTGTTCCTACGTACAAGGAGTTGCGAAGAAGGCAACTCTTCCCCTCCCTGAAGCCAAAGGAA |
| TP53LC19 | GACAAGACCAGGTACCTGTCGGGGGATGCGGCCGTGGTACCAGGCATGGCTGCGCAGGTCCTCGCTGCTCAGGAGCAGCTCCTCCTCCAGCTCCTTCTTCAGTTTCTCGGGGGTCCTGTCCATGATGTGCCTCTCCTTGGAGAACTGCAACACAGAGTCAACCATGAGCTCACCCTGCCCAGGCCACACCAGGCCATGCCAGCTGGAGGTGACCGCCTGCTTCAC |
| TINCR | AGAGCTGGAGCCGGAGCCGGGCGGGCGCCATGGAGGGGCTGCGGCGGGGGCTGTCGCGCTGGAAGCGCTACCACATCAAGGTGCACCTGGCGGACGAGGCGCTGCTGCTACCGCTGACCGTGCGGCCGCGGGACACGCTCAGCGACCTGCGCGCCCAGCTGGTGGGCCAGGGCGTGAGCTCCTGGAAGCGCGCCTTCTACTACAACGCGCGGCGGCTGGACGACCACCAGACGGTGCGCGACGCGCGCCTGCAGGACGGCTCGGTGCTGCTGCTCGTCAGCGACCCCAGG |
| TINCR-FS | CGCCATTGGAGGGGCTGCGGCGGGGGCTGTCGCGCTGGAAGCGCTACCACATCAAGGTGCACCTGGCGGACGAGGCGCTGCTGCTACCGCTGACCGTGCGGCCGCGGGACACGCTCAGCGACCTGCGCGCCCAGCTGGTGGGCCAGGGCGTGAGCTCCTGGAAGCGCGCCTTCTACTACAACGCGCGGCGGCTGGACGACCACCAGACGGTGCGCGACGCGCGCCTGCAGGACGGCTCGGTGCTGCTGCTCGTCAGCGACCCCAGG |
| hMINION | TGGCCCTGCCATGCCCACGCCACTGCTCCCGCTGCTGCTTCGATTGCTGCTGTCCTGCCTGCTGCTGCCTGCTGCCCGCCTGGCCCGCCAATACCTCCTGCCCCTGCTGCGCCGATTGGCCCGCCGCCTGGGCTCCCAGGACATGCGAGAGGCTTTGCTGGGCTGTCTGCTGTTCATTCTCAGCCAGCGACACTCGCCAGACGCTGGGGAGGCCTCAAGAGTGGACCGCCTGGAGAGGAGGGAGAGGTTAGGCCCCCAAAAG |
| hMINION–FS | TGGCCCTGCCATTGCCCACGCCACTGCTCCCGCTGCTGCTTCGATTGCTGCTGTCCTGCCTGCTGCTGCCTGCTGCCCGCCTGGCCCGCCAATACCTCCTGCCCCTGCTGCGCCGATTGGCCCGCCGCCTGGGCTCCCAGGACATGCGAGAGGCTTTGCTGGGCTGTCTGCTGTTCATTCTCAGCCAGCGACACTCGCCAGACGCTGGGGAGGCCTCAAGAGTGGACCGCCTGGAGAGGAGGGAGAGGTTAGGCCCCCAAAAG |
